# Supplementary material
Source: Hindawi journal article supplement (doi:10.1155/2010/391583)
Supplement: f1 [file 391583.f1.pdf]

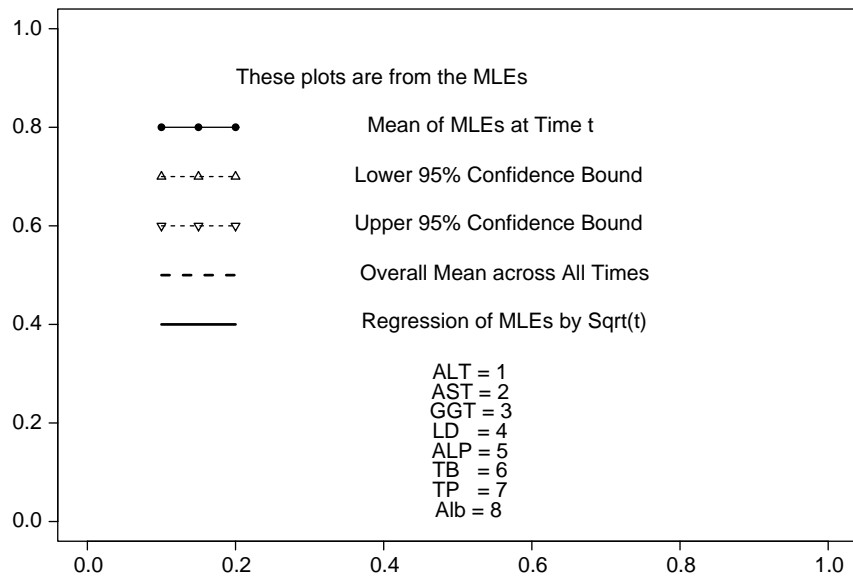

Legend for Plots for Figure S1.1 to Figure S1.264

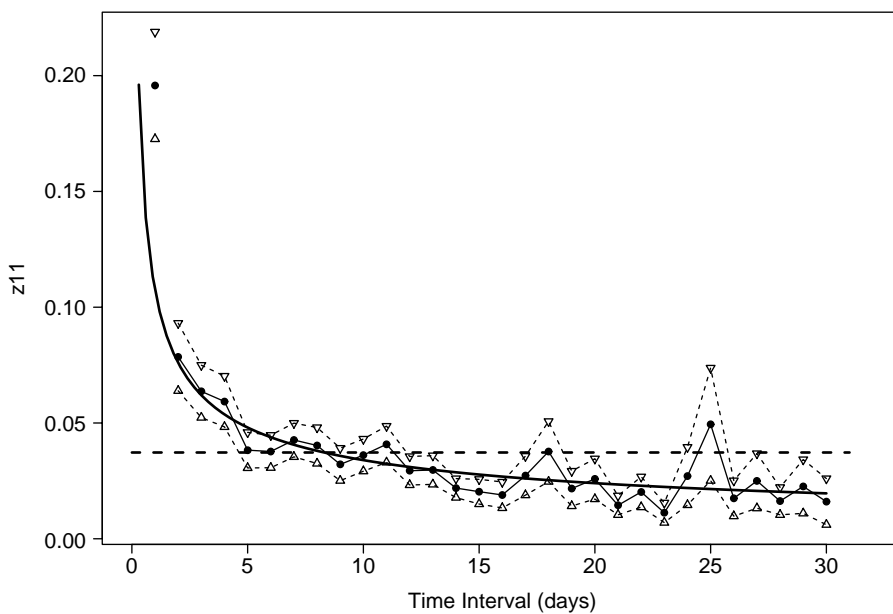

Figure S1.1. MLE of  $z_{11}$  by Time Interval Compared to Overall Mean (0.0373) for  $p = 1$  and  $f(t) = t$ .

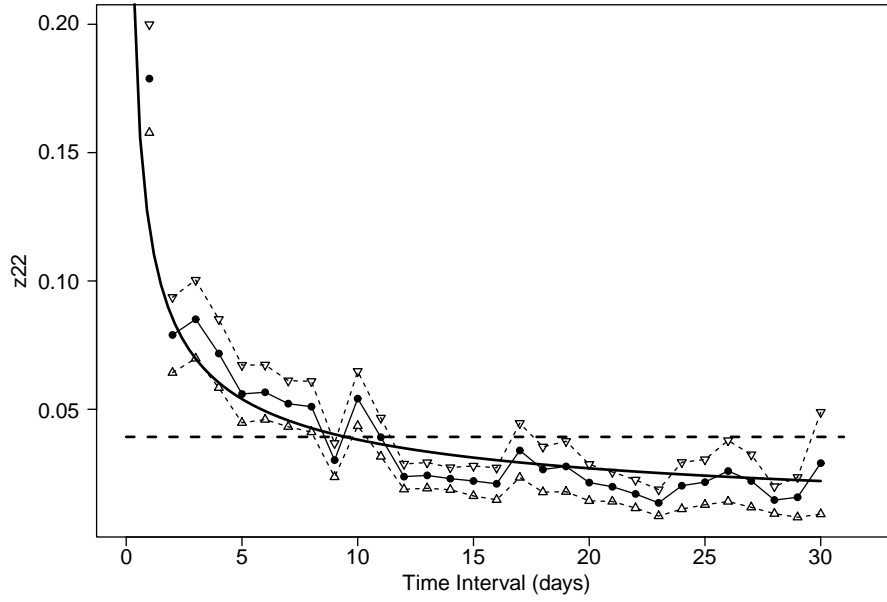

Figure S1.2. MLE of  $z_{22}$  by Time Interval Compared to Overall Mean (0.0392) for  $p = 1$  and  $f(t) = t$ .

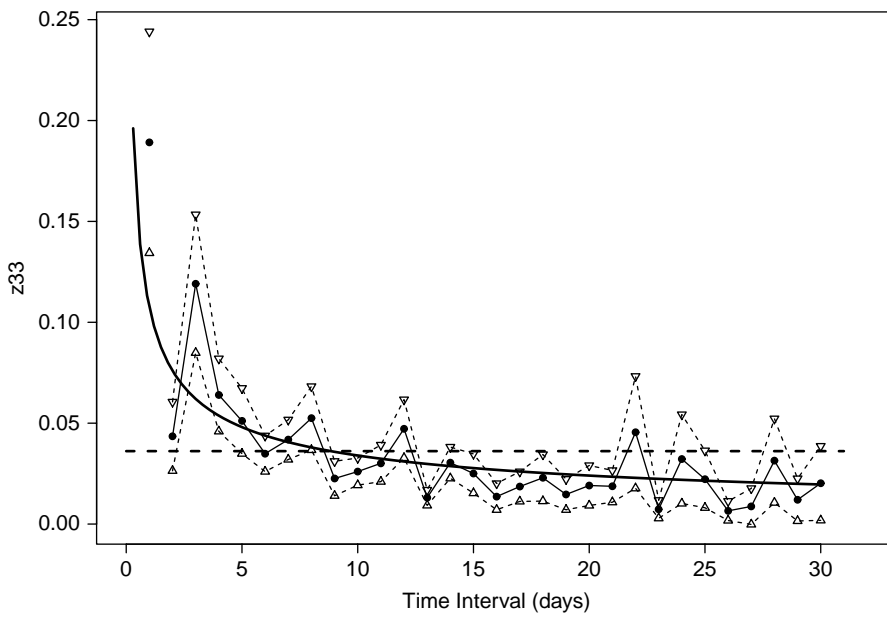

Figure S1.3. MLE of  $z_{33}$  by Time Interval Compared to Overall Mean (0.0361) for  $p = 1$  and  $f(t) = t$ .

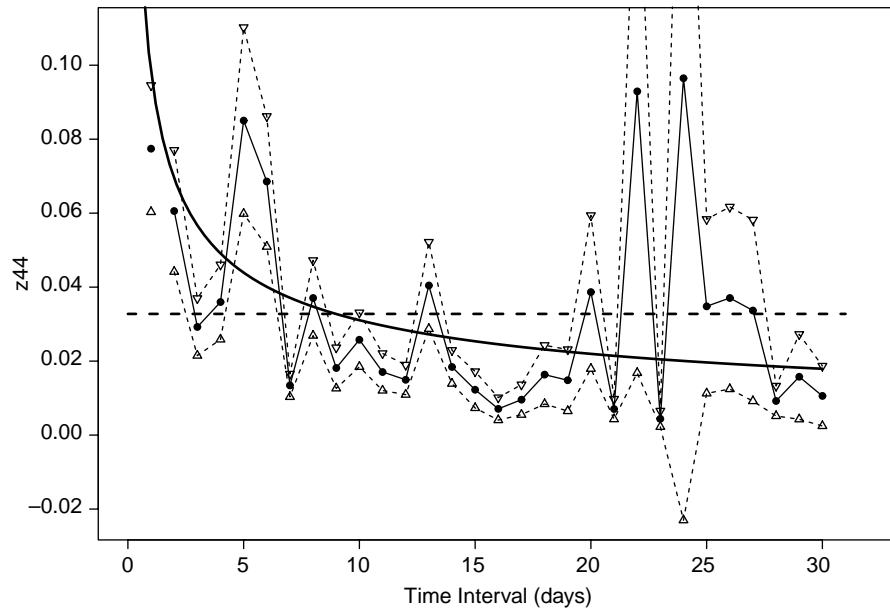

Figure S1.4. MLE of  $z_{44}$  by Time Interval Compared to Overall Mean (0.0328) for  $p = 1$  and  $f(t) = t$ .

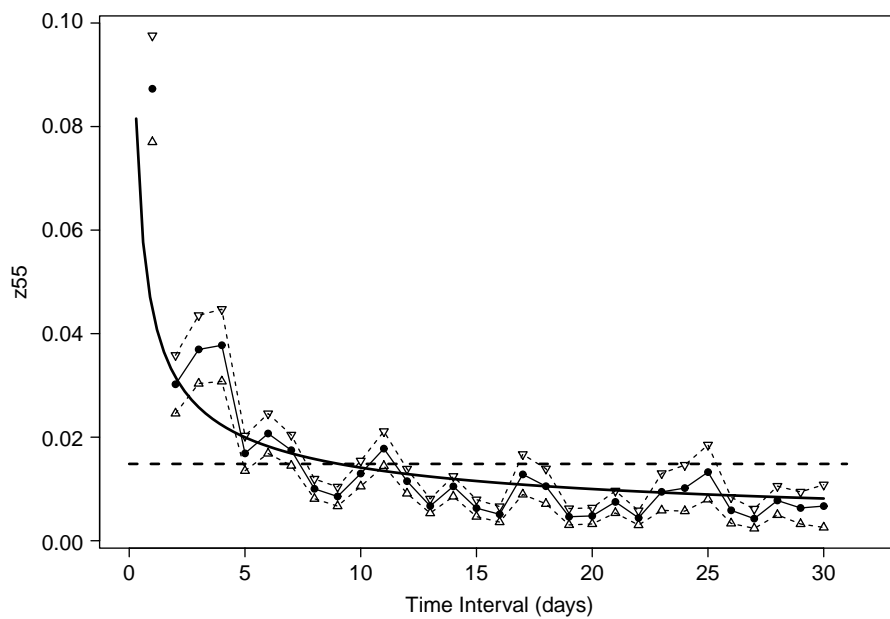

Figure S1.5. MLE of  $z_{55}$  by Time Interval Compared to Overall Mean (0.0148) for  $p = 1$  and  $f(t) = t$ .

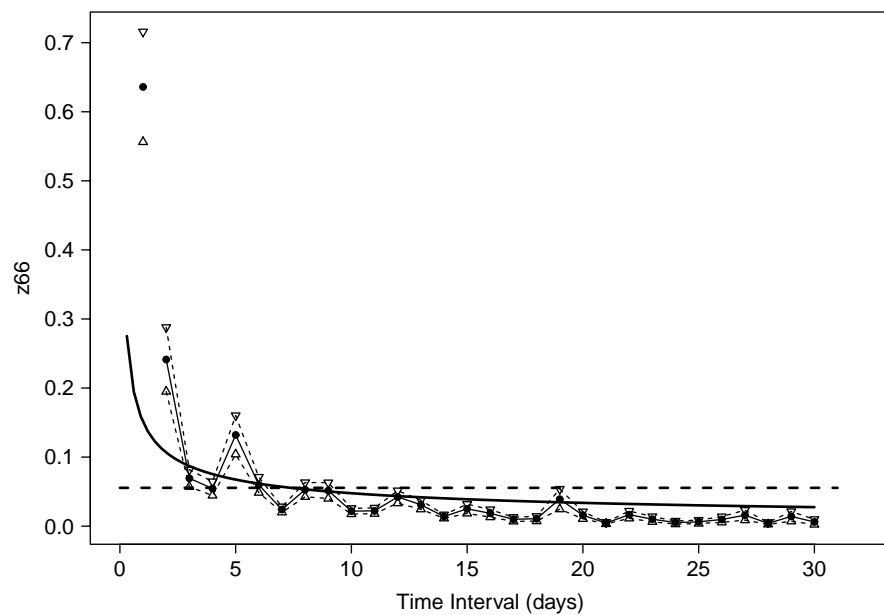

Figure S1.6. MLE of  $z_{66}$  by Time Interval Compared to Overall Mean (0.0555) for  $p = 1$  and  $f(t) = t$ .

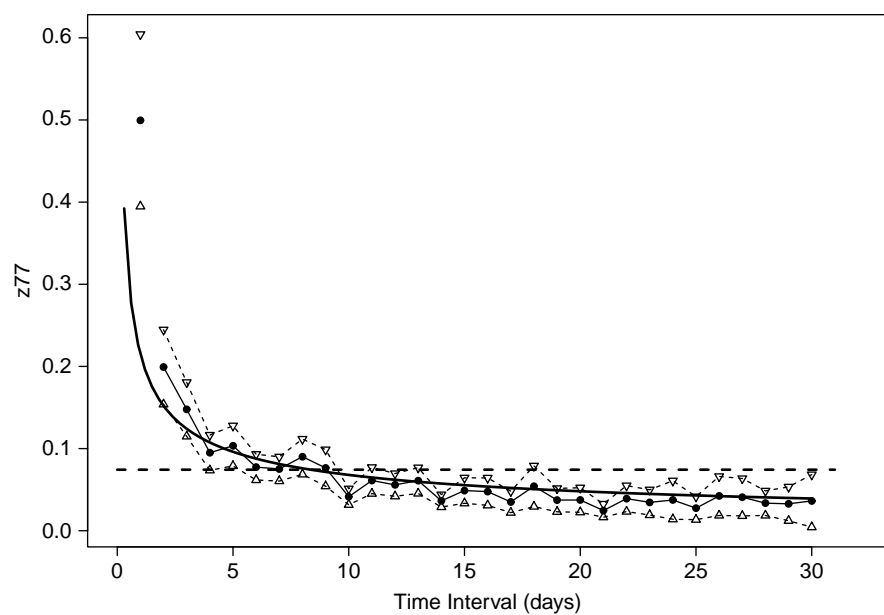

Figure S1.7. MLE of  $z_{77}$  by Time Interval Compared to Overall Mean (0.0743) for  $p = 1$  and  $f(t) = t$ .

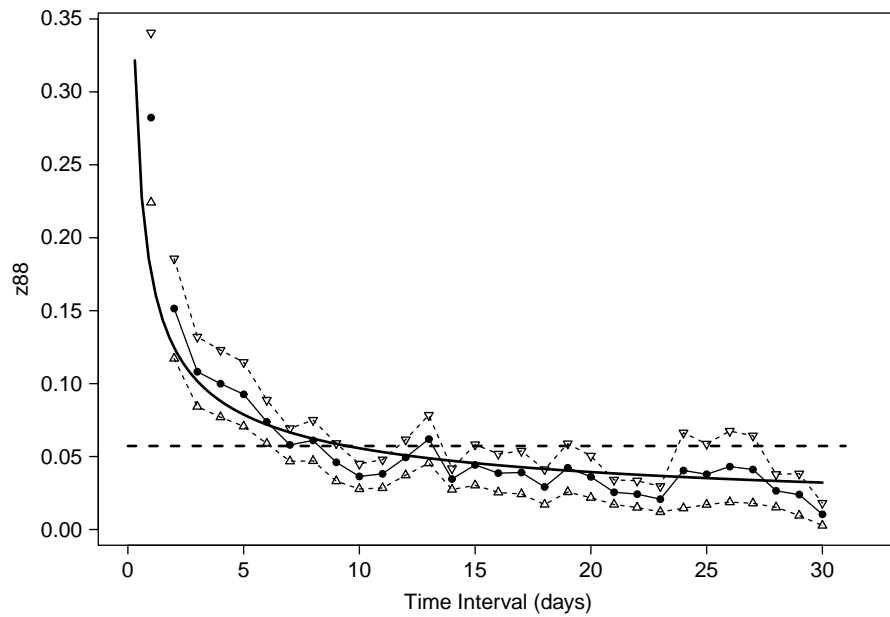

Figure S1.8. MLE of  $z_{88}$  by Time Interval Compared to Overall Mean (0.0573) for  $p = 1$  and  $f(t) = t$ .

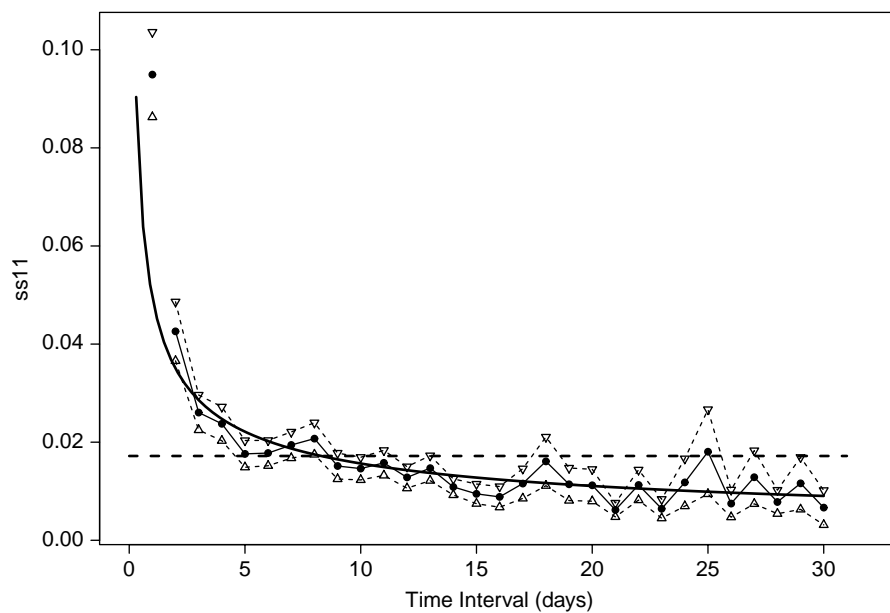

Figure S1.9. MLE of  $ss_{11}$  by Time Interval Compared to Overall Mean (0.0172) for  $p = 1$  and  $f(t) = t$ .

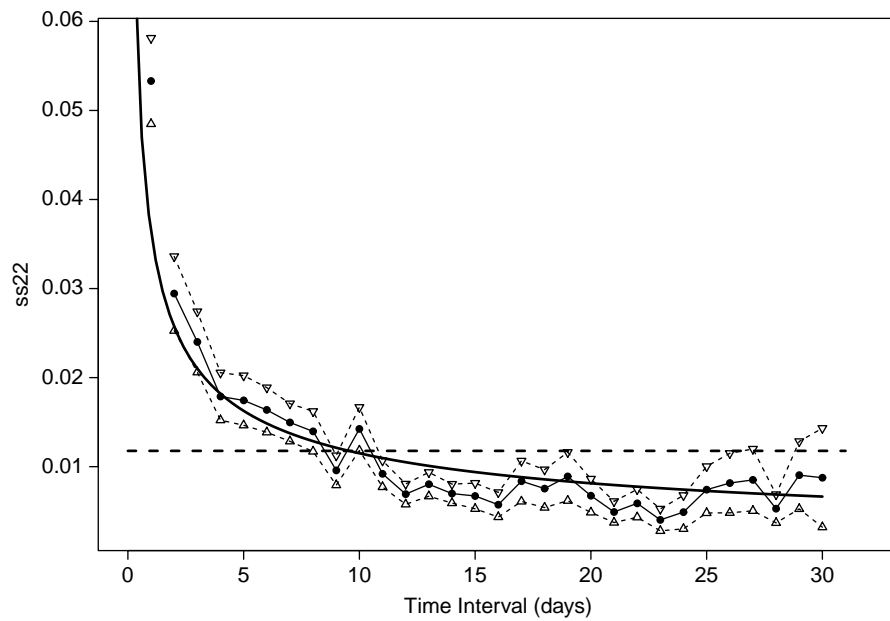

Figure S1.10. MLE of  $ss_{22}$  by Time Interval Compared to Overall Mean (0.0118) for  $p = 1$  and  $f(t) = t$ .

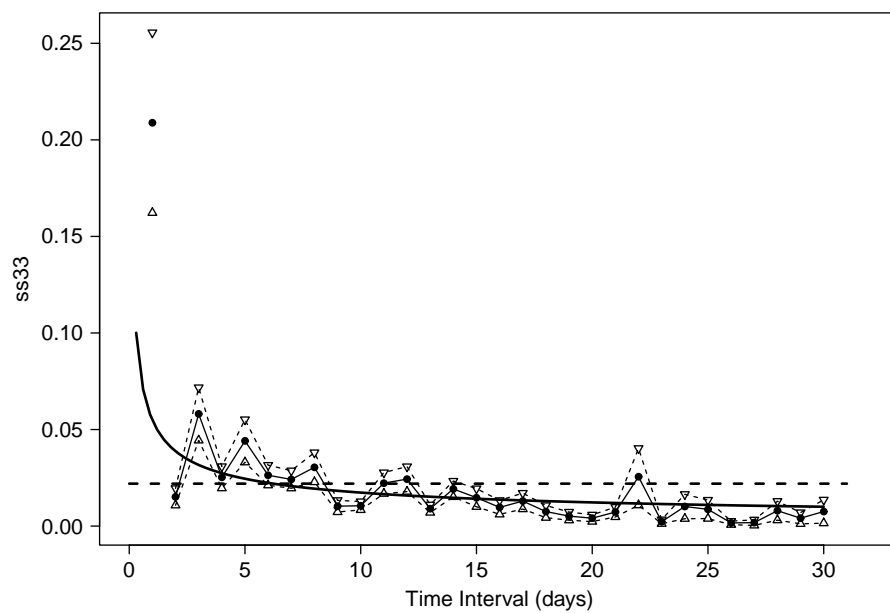

Figure S1.11. MLE of  $ss_{33}$  by Time Interval Compared to Overall Mean (0.022) for  $p = 1$  and  $f(t) = t$ .

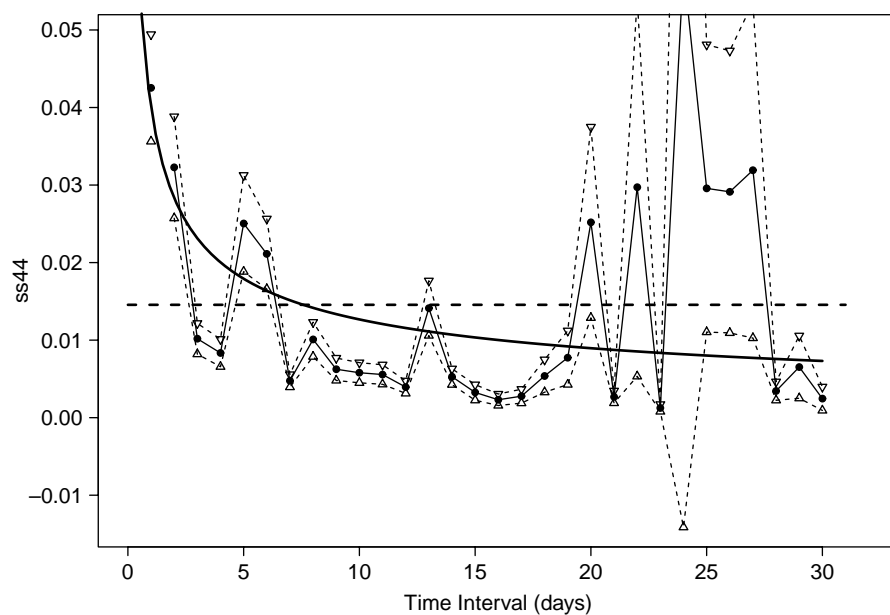

Figure S1.12. MLE of  $ss_{44}$  by Time Interval Compared to Overall Mean (0.0146) for  $p = 1$  and  $f(t) = t$ .

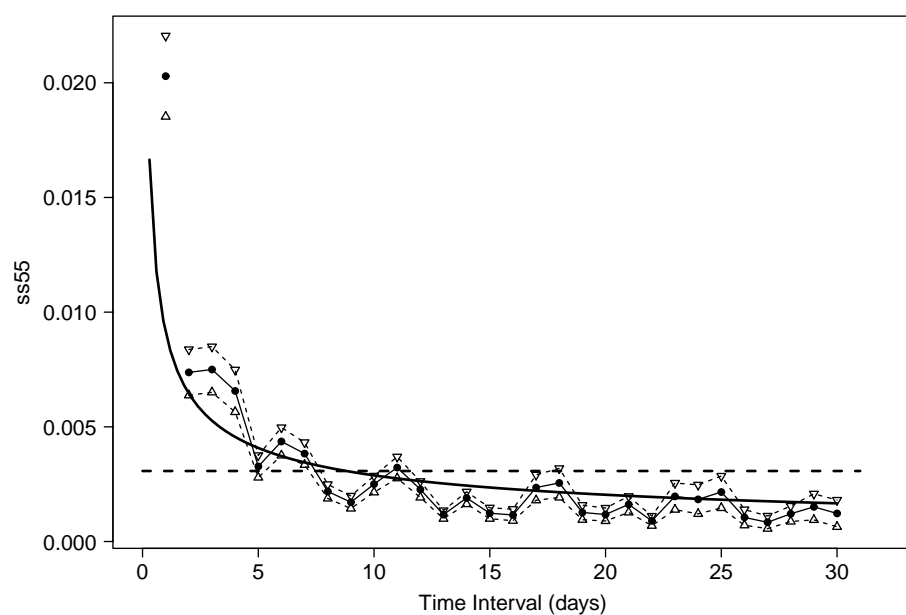

Figure S1.13. MLE of  $ss_{55}$  by Time Interval Compared to Overall Mean (0.0031) for  $p = 1$  and  $f(t) = t$ .

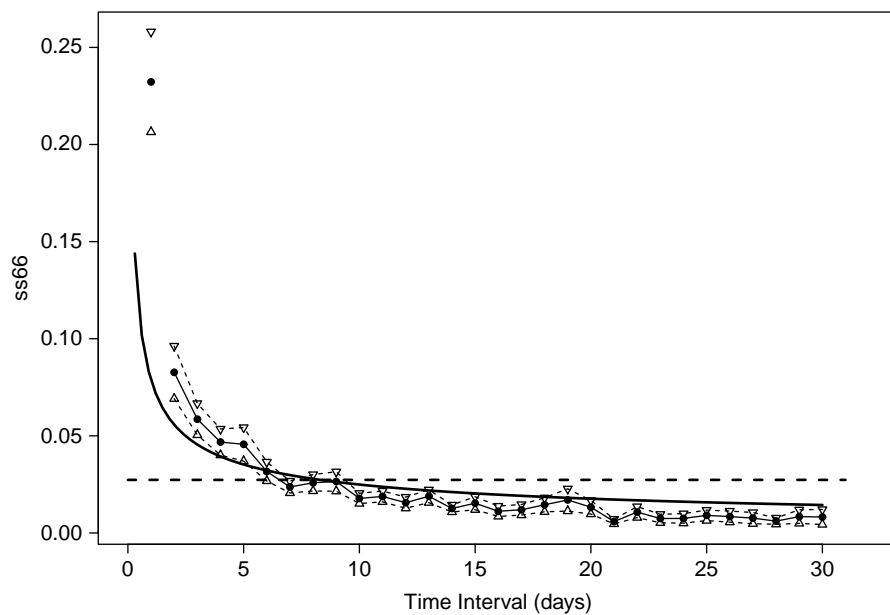

Figure S1.14. MLE of ss66 by Time Interval Compared to Overall Mean (0.0273) for  $p = 1$  and  $f(t) = t$ .

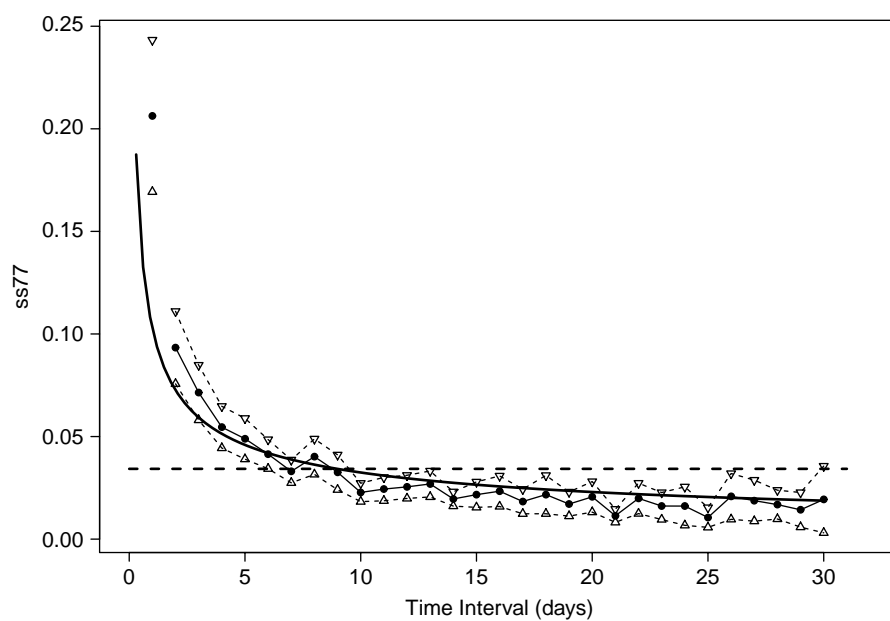

Figure S1.15. MLE of ss77 by Time Interval Compared to Overall Mean (0.0343) for  $p = 1$  and  $f(t) = t$ .



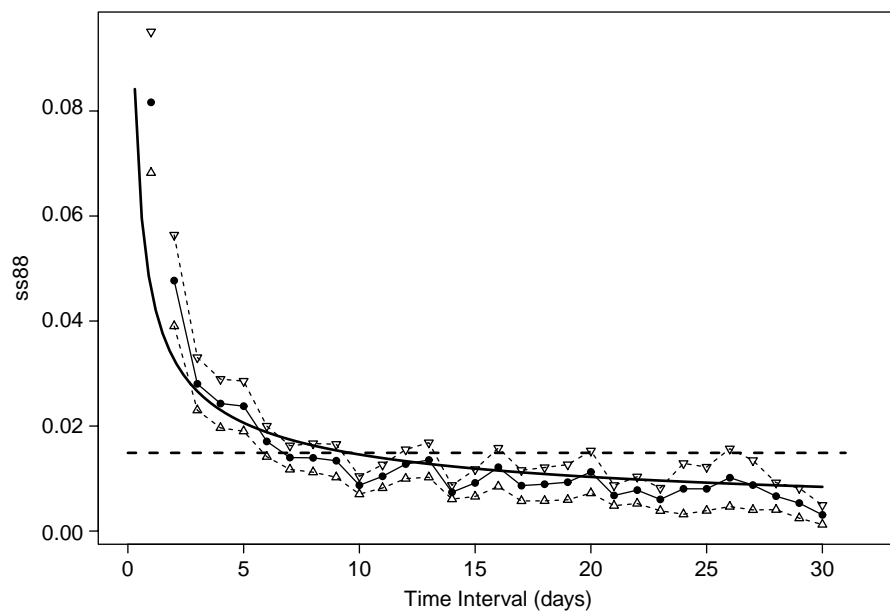

Figure S1.16. MLE of  $ss88$  by Time Interval Compared to Overall Mean (0.0149) for  $p = 1$  and  $f(t) = t$ .

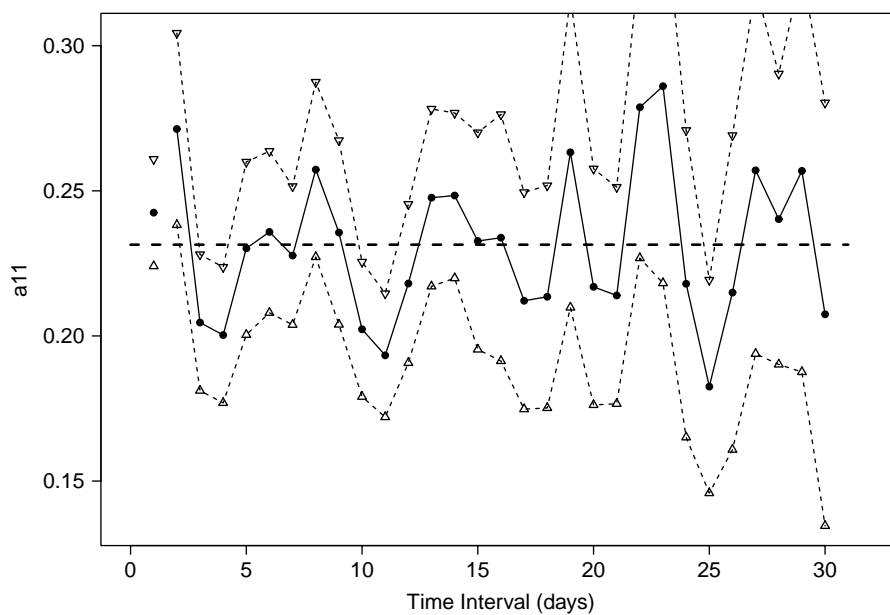

Figure S1.17. MLE of  $a11$  by Time Interval Compared to Overall Mean (0.2314) for  $p = 1$  and  $f(t) = t$ .

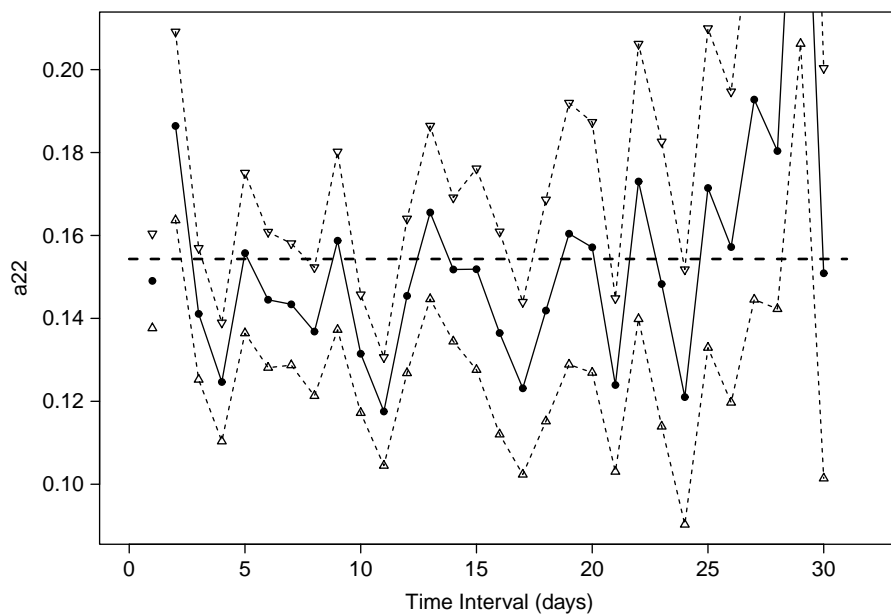

Figure S1.18. MLE of  $a_{22}$  by Time Interval Compared to Overall Mean (0.1543) for  $p = 1$  and  $f(t) = t$ .

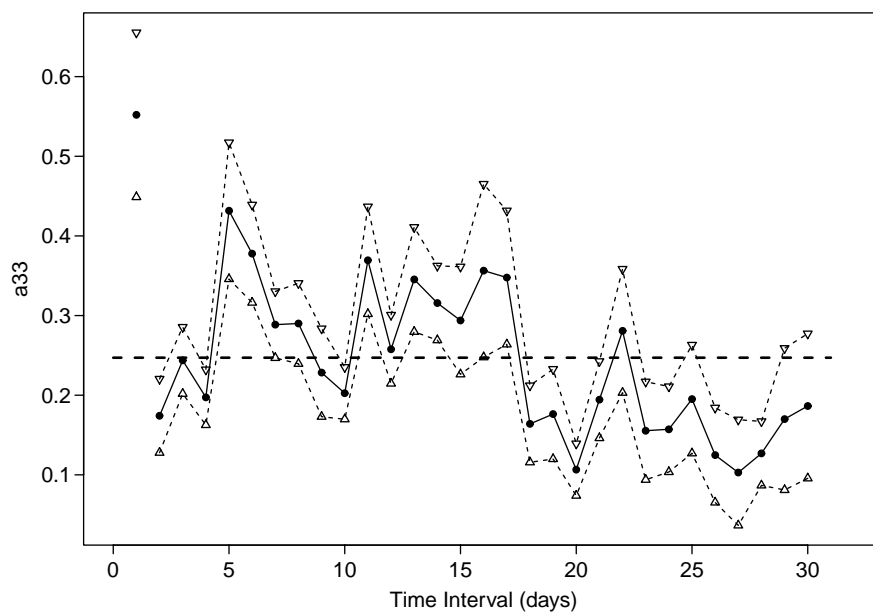

Figure S1.19. MLE of  $a_{33}$  by Time Interval Compared to Overall Mean (0.2471) for  $p = 1$  and  $f(t) = t$ .

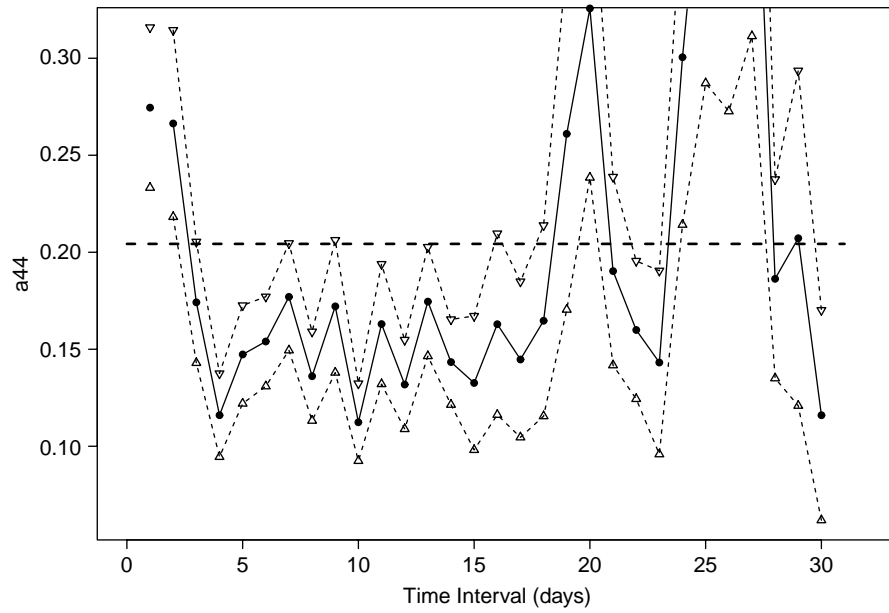

Figure S1.20. MLE of  $a_{44}$  by Time Interval Compared to Overall Mean (0.2043) for  $p = 1$  and  $f(t) = t$ .

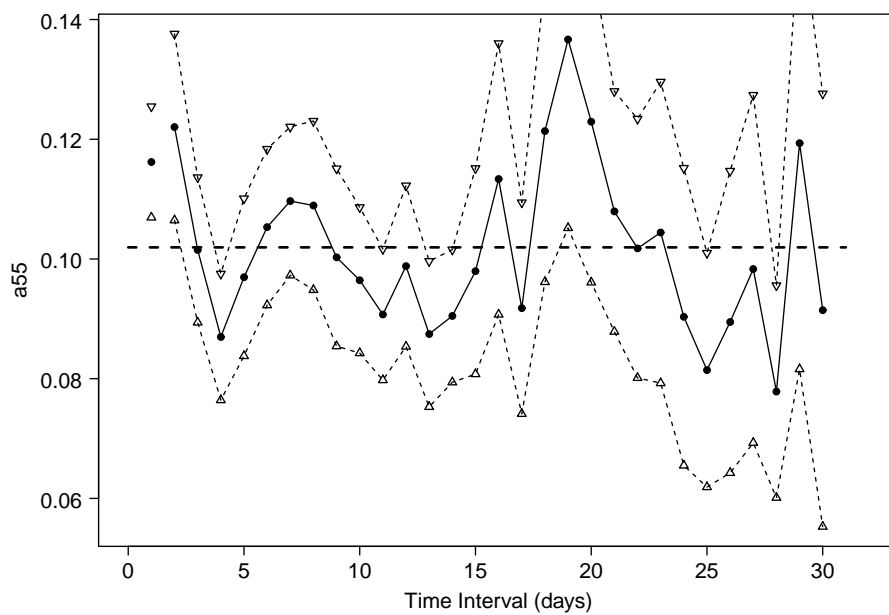

Figure S1.21. MLE of  $a_{55}$  by Time Interval Compared to Overall Mean (0.1019) for  $p = 1$  and  $f(t) = t$ .

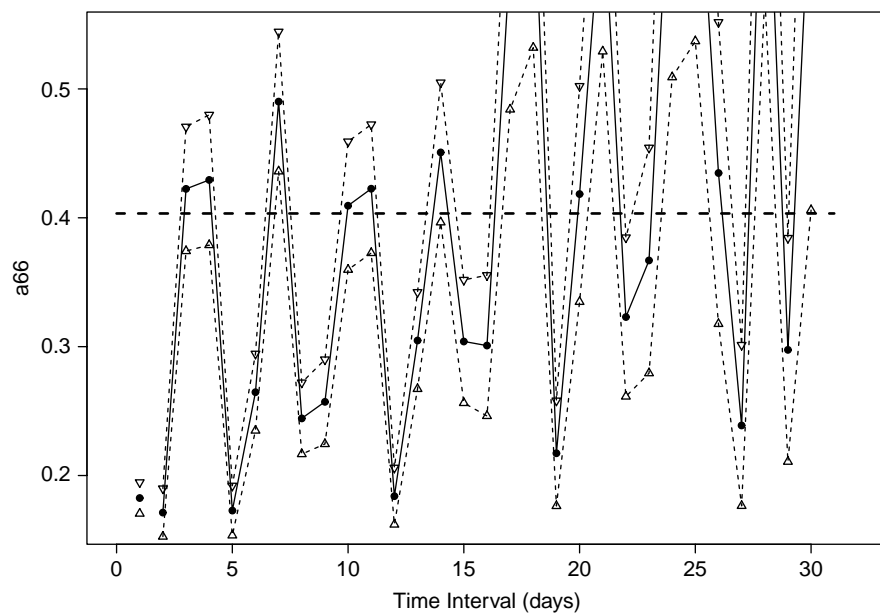

Figure S1.22. MLE of  $a_{66}$  by Time Interval Compared to Overall Mean (0.4034) for  $p = 1$  and  $f(t) = t$ .

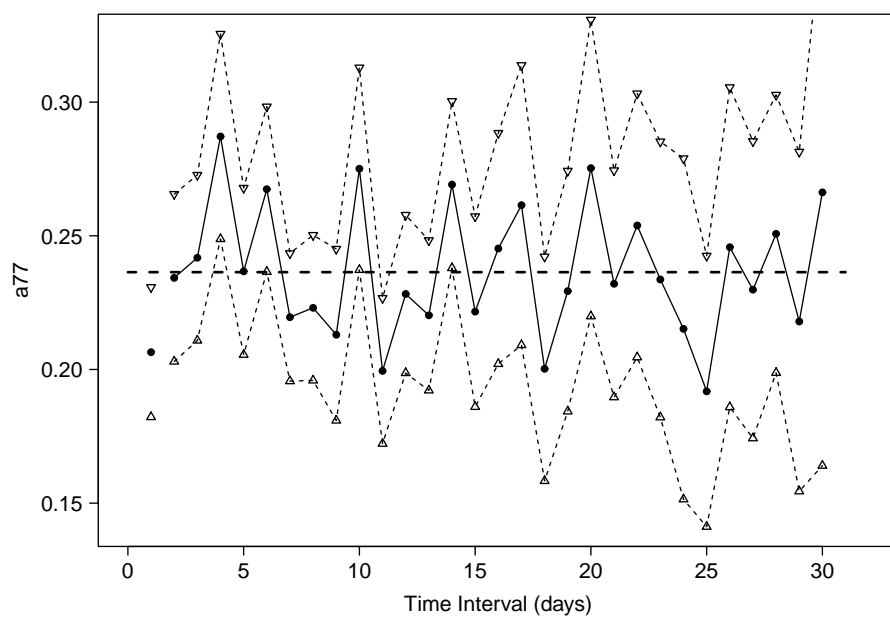

Figure S1.23. MLE of  $a_{77}$  by Time Interval Compared to Overall Mean (0.2364) for  $p = 1$  and  $f(t) = t$ .

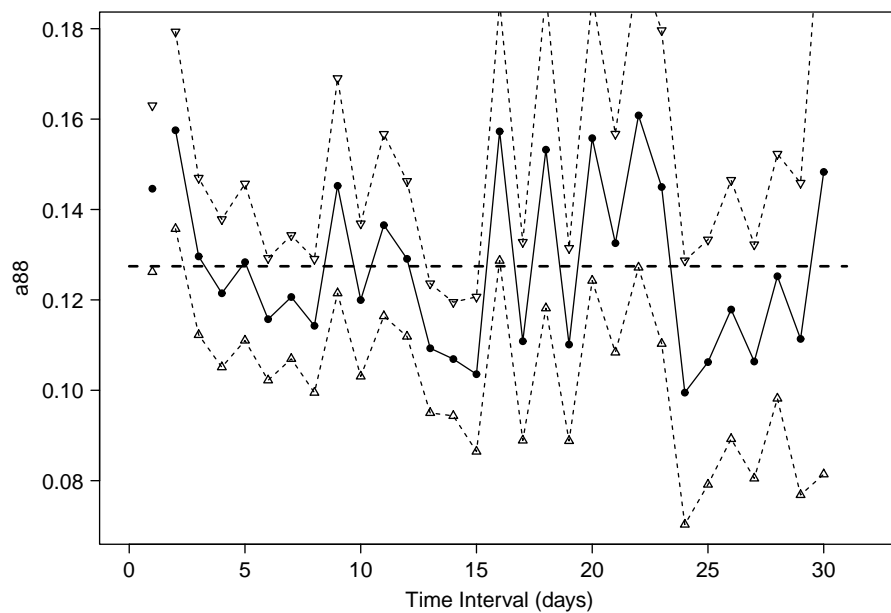

Figure S1.24. MLE of  $a_{88}$  by Time Interval Compared to Overall Mean (0.1274) for  $p = 1$  and  $f(t) = t$ .

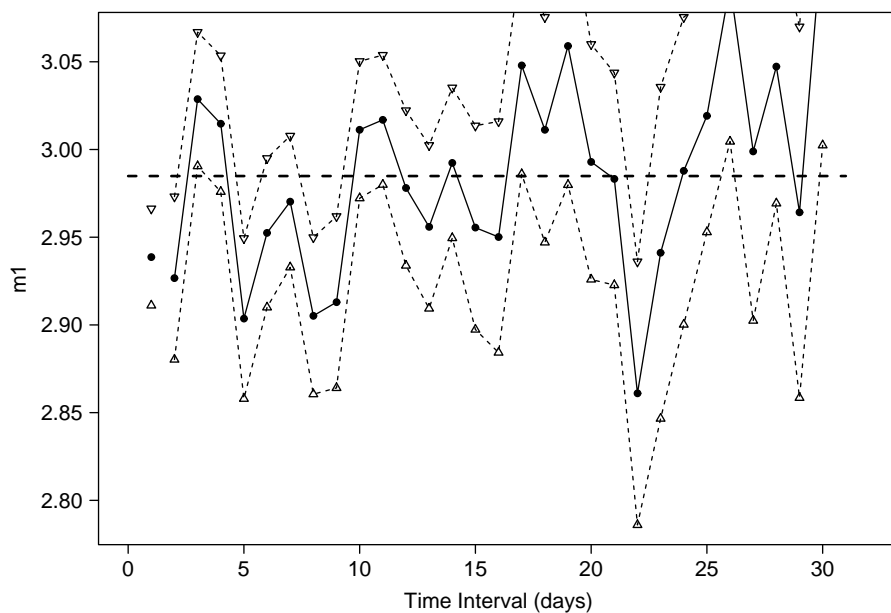

Figure S1.25. MLE of  $m_1$  by Time Interval Compared to Overall Mean (2.9849) for  $p = 1$  and  $f(t) = t$ .

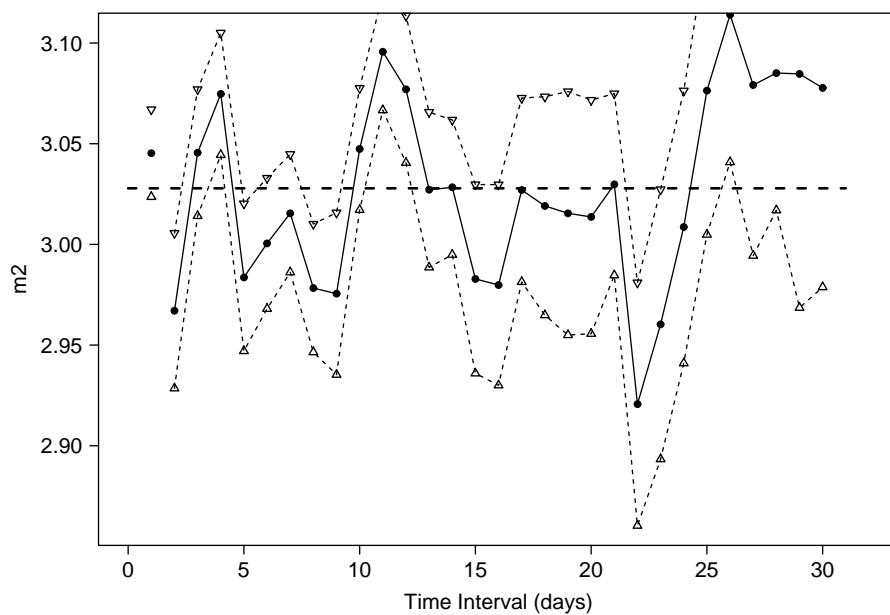

Figure S1.26. MLE of  $m_2$  by Time Interval Compared to Overall Mean (3.0279) for  $p = 1$  and  $f(t) = t$ .

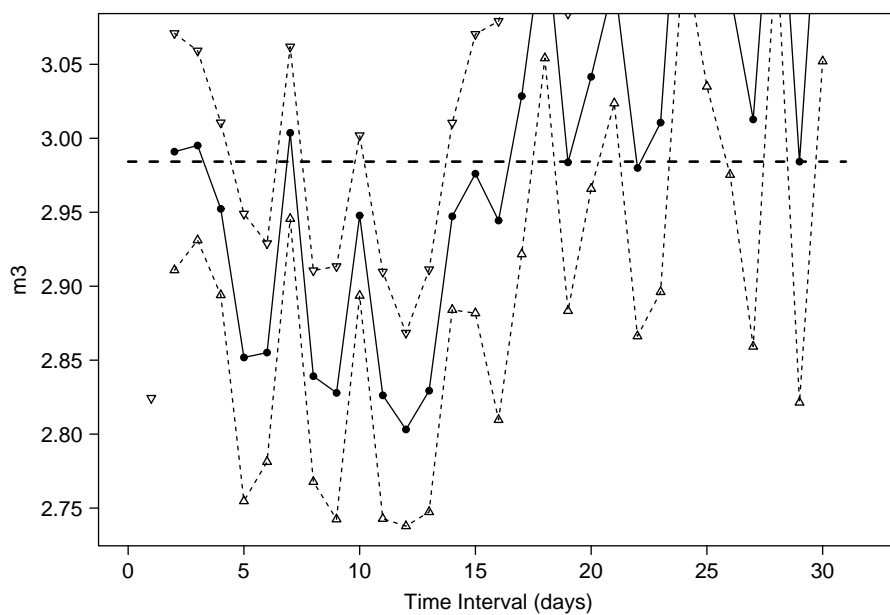

Figure S1.27. MLE of  $m_3$  by Time Interval Compared to Overall Mean (2.9842) for  $p = 1$  and  $f(t) = t$ .

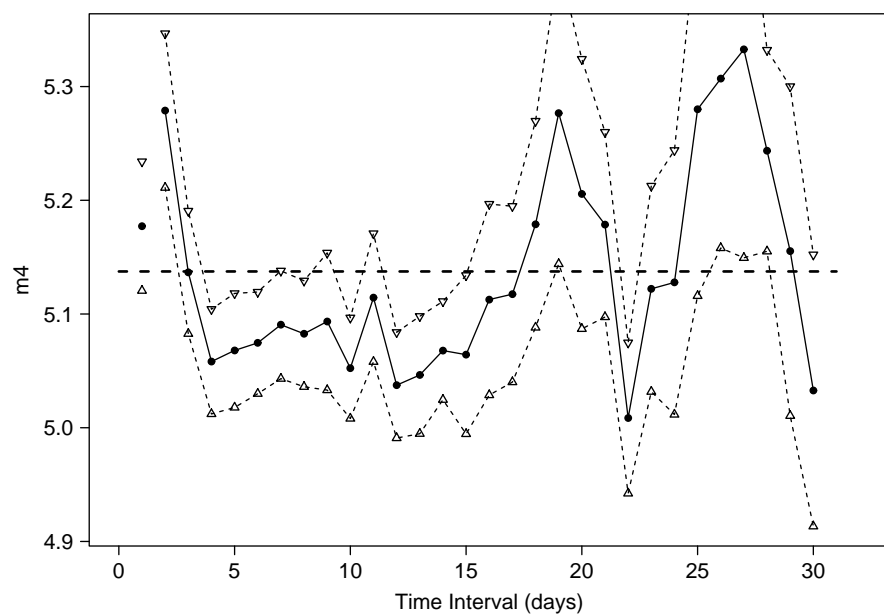

Figure S1.28. MLE of  $m_4$  by Time Interval Compared to Overall Mean (5.1374) for  $p = 1$  and  $f(t) = t$ .

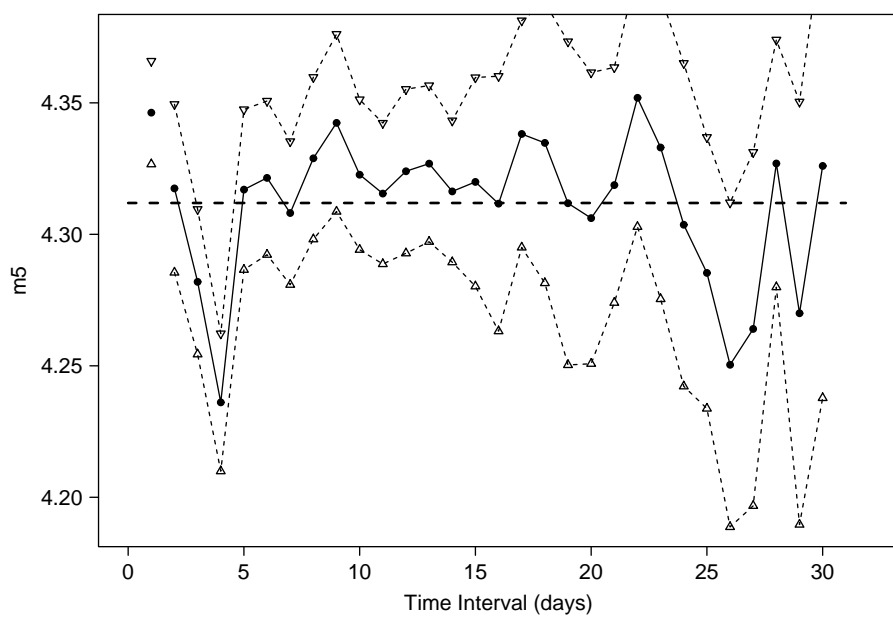

Figure S1.29. MLE of  $m_5$  by Time Interval Compared to Overall Mean (4.3119) for  $p = 1$  and  $f(t) = t$ .

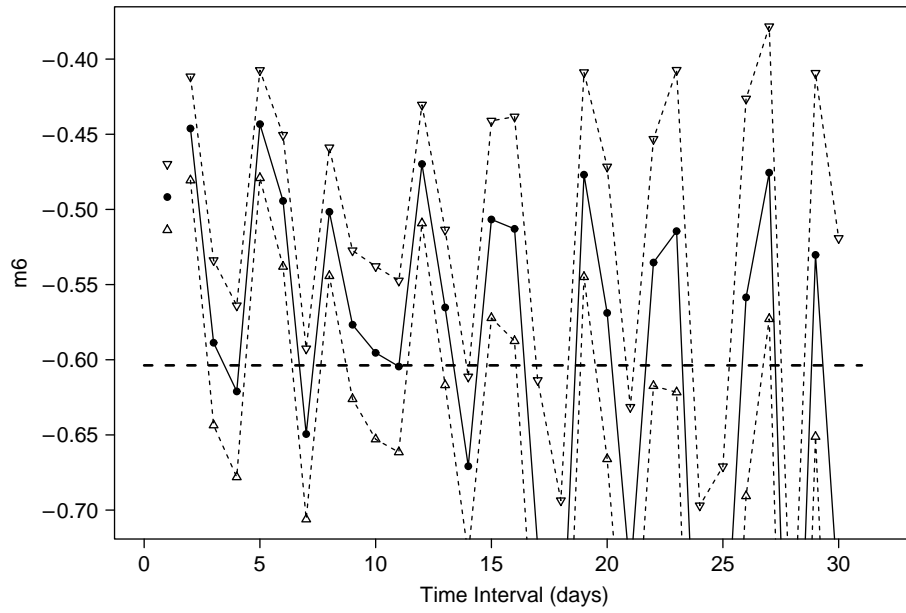

Figure S1.30. MLE of  $m_6$  by Time Interval Compared to Overall Mean ( $-0.6037$ ) for  $p = 1$  and  $f(t) = t$ .

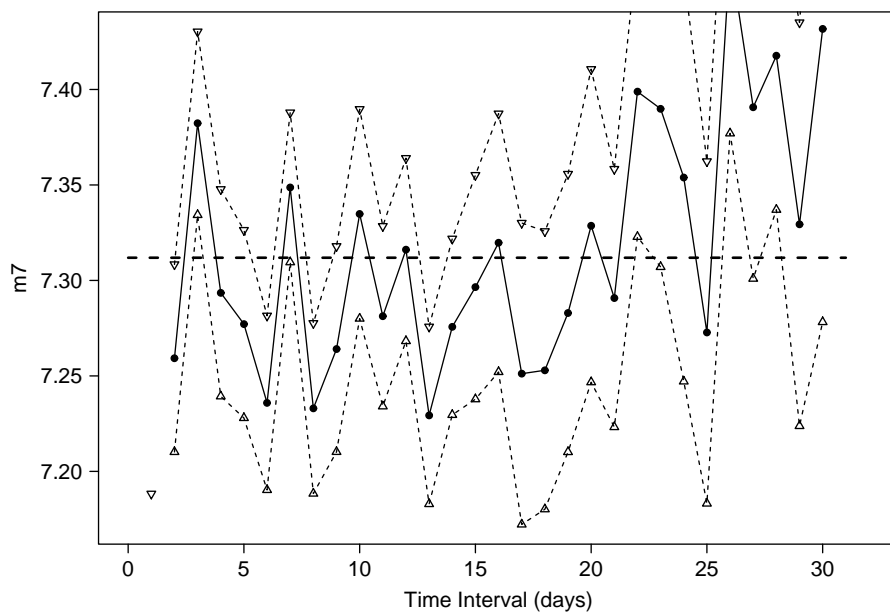

Figure S1.31. MLE of  $m_7$  by Time Interval Compared to Overall Mean ( $7.3119$ ) for  $p = 1$  and  $f(t) = t$ .



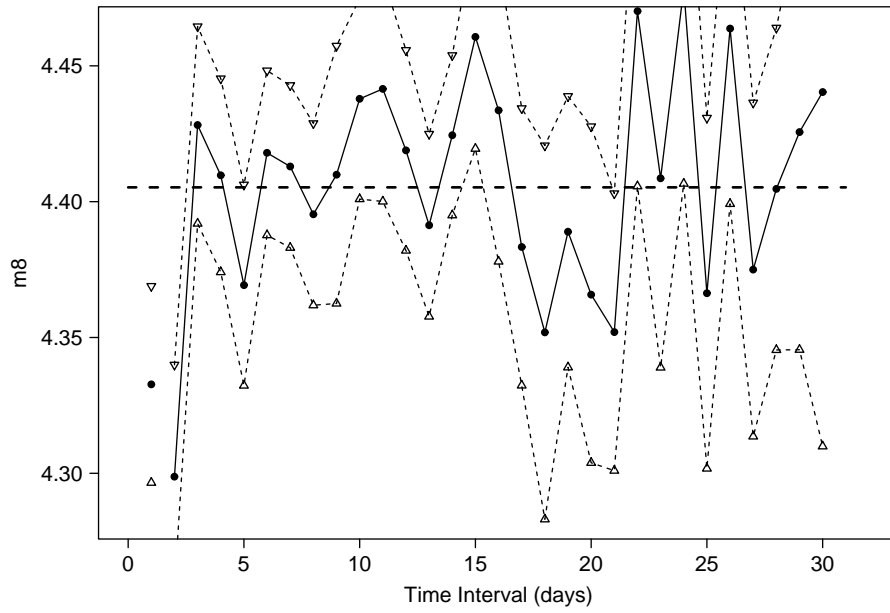

Figure S1.32. MLE of  $m_8$  by Time Interval Compared to Overall Mean (4.4053) for  $p = 1$  and  $f(t) = t$ .

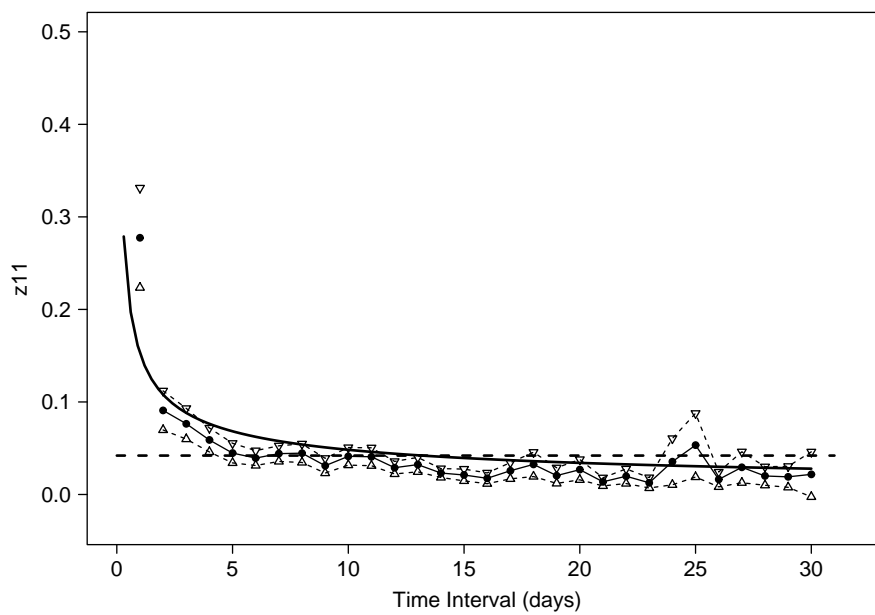

Figure S1.33. MLE of  $z_{11}$  by Time Interval Compared to Overall Mean (0.042) for  $p = 2$  and  $f(t) = t$ .

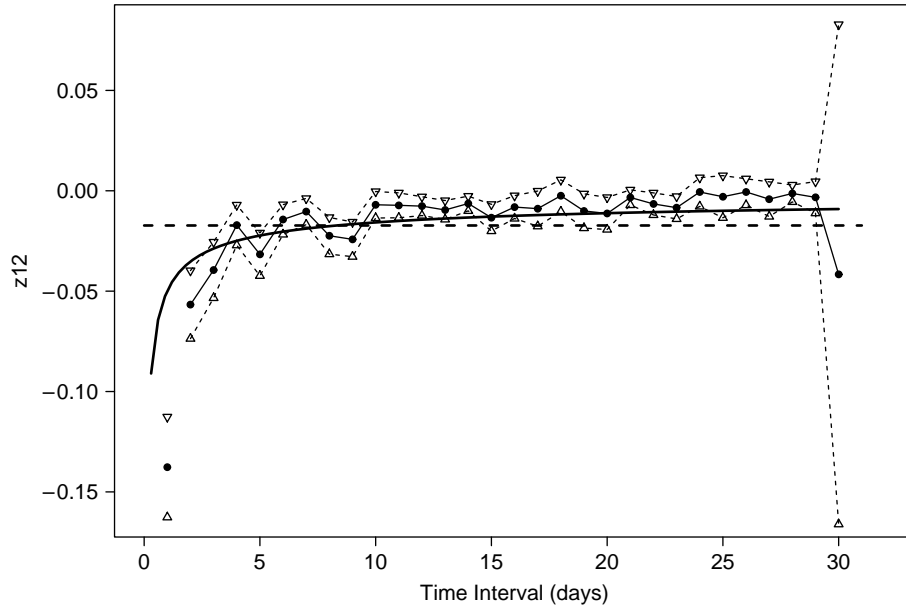

Figure S1.34. MLE of  $z_{12}$  by Time Interval Compared to Overall Mean ( $-0.0173$ ) for  $p = 2$  and  $f(t) = t$ .

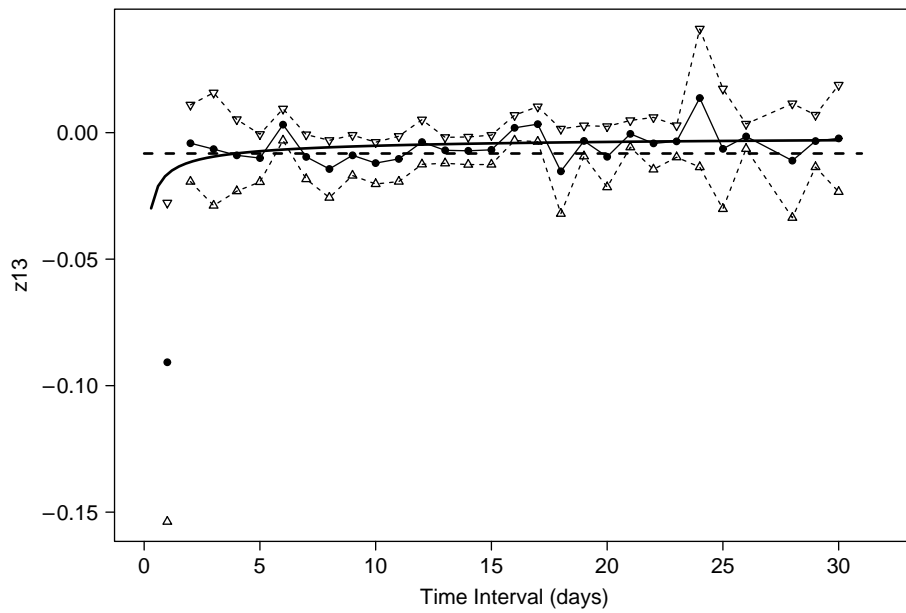

Figure S1.35. MLE of  $z_{13}$  by Time Interval Compared to Overall Mean ( $-0.0082$ ) for  $p = 2$  and  $f(t) = t$ .

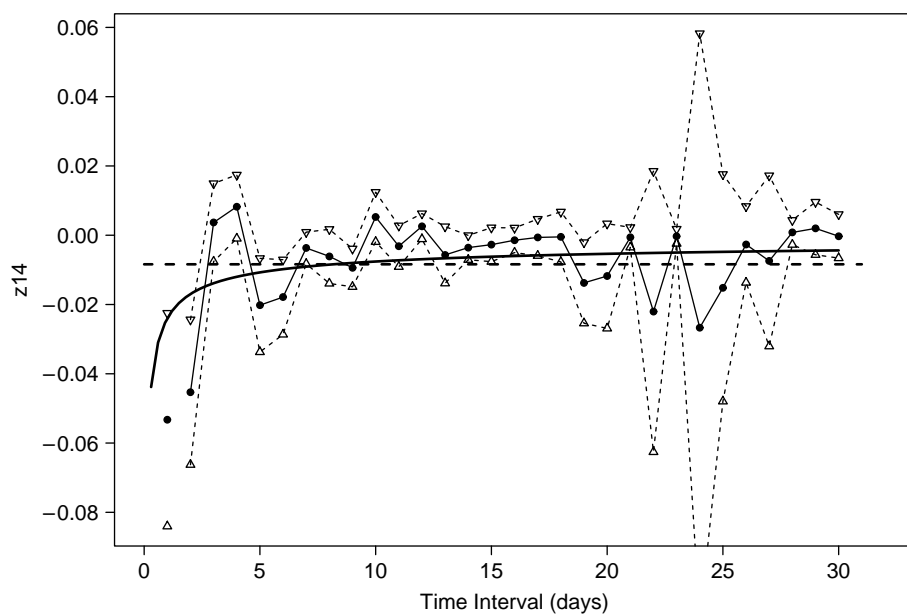

Figure S1.36. MLE of  $z_{14}$  by Time Interval Compared to Overall Mean ( $-0.0084$ ) for  $p = 2$  and  $f(t) = t$ .

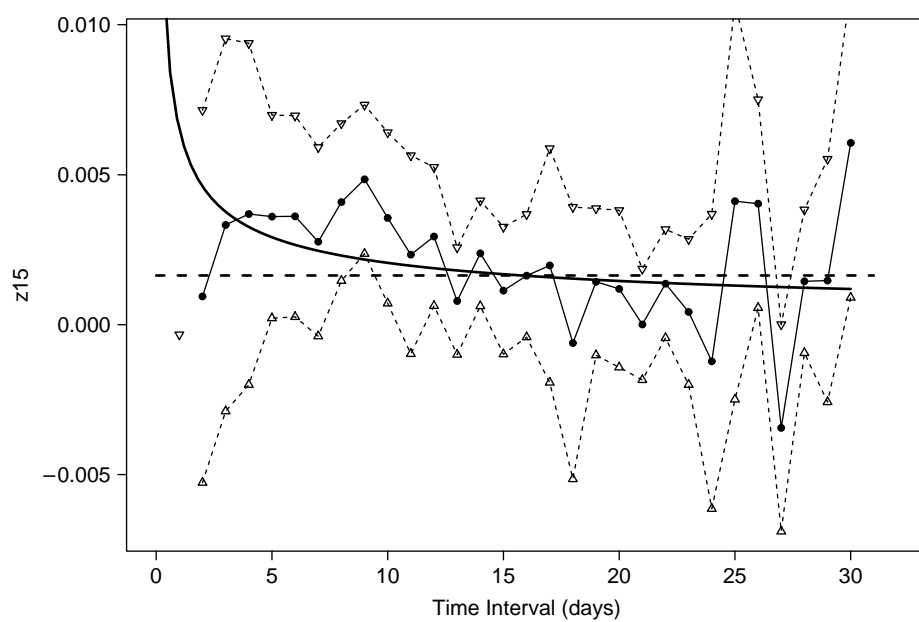

Figure S1.37. MLE of  $z_{15}$  by Time Interval Compared to Overall Mean ( $0.0016$ ) for  $p = 2$  and  $f(t) = t$ .

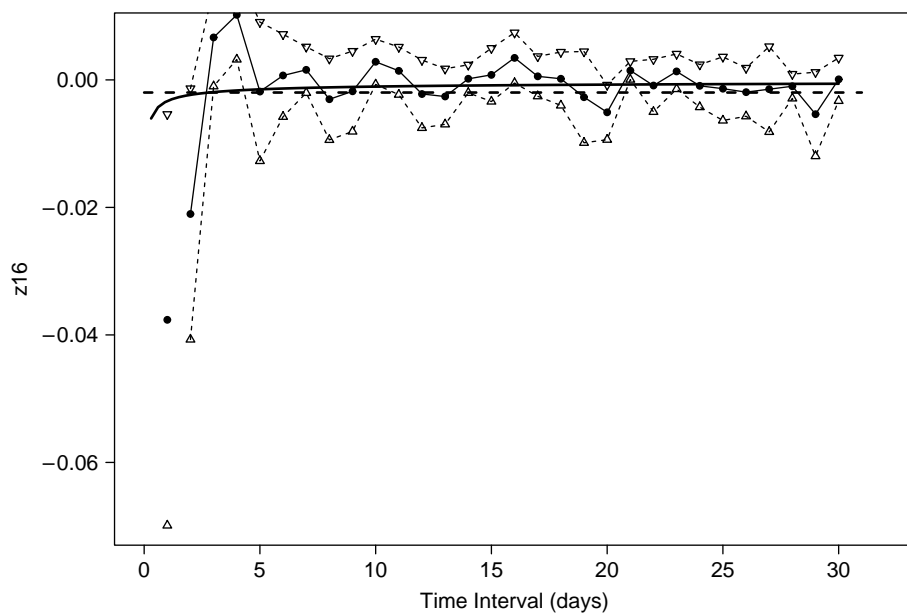

Figure S1.38. MLE of  $z_{16}$  by Time Interval Compared to Overall Mean ( $-0.002$ ) for  $p = 2$  and  $f(t) = t$ .

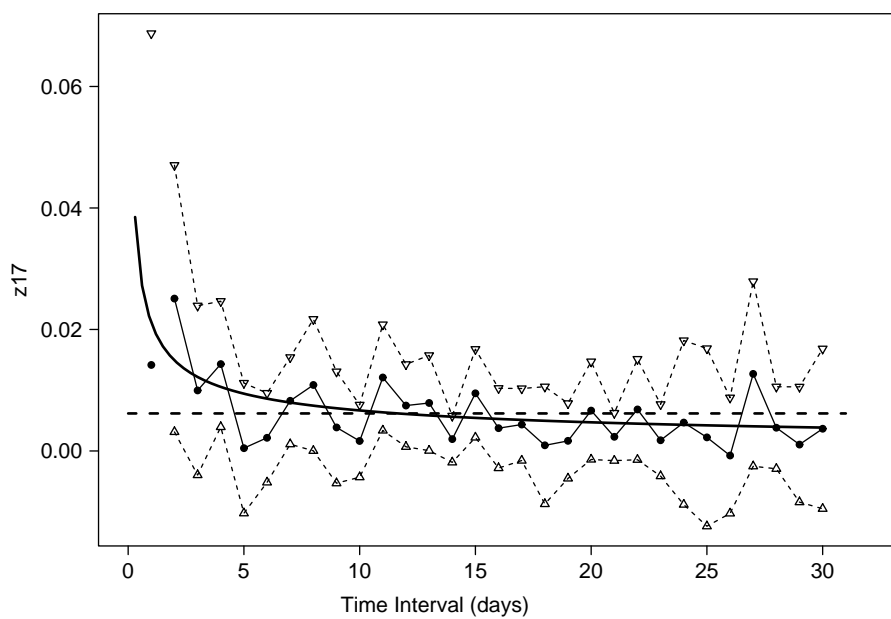

Figure S1.39. MLE of  $z_{17}$  by Time Interval Compared to Overall Mean ( $0.0062$ ) for  $p = 2$  and  $f(t) = t$ .

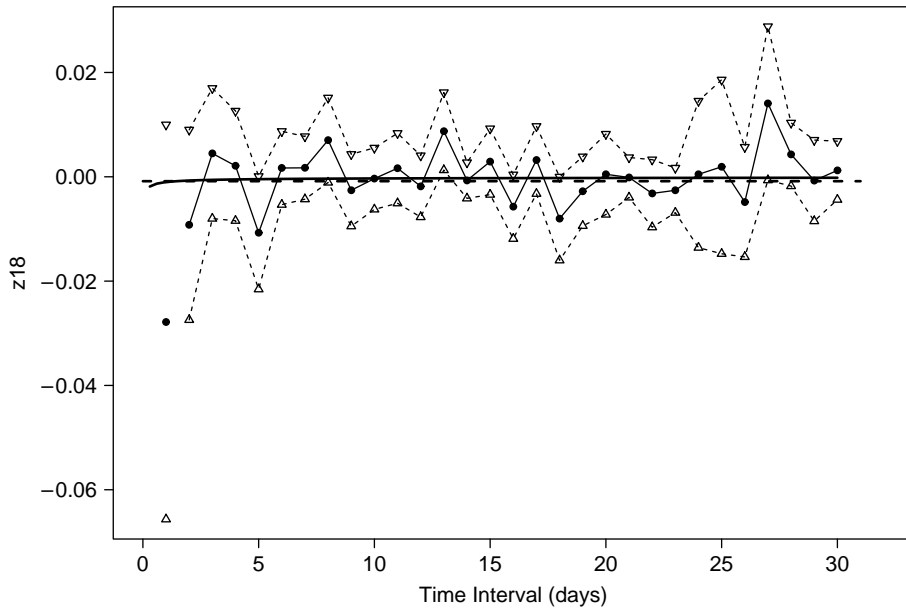

Figure S1.40. MLE of  $z_{18}$  by Time Interval Compared to Overall Mean ( $-8 \times 10^{-4}$ ) for  $p = 2$  and  $f(t) = t$ .

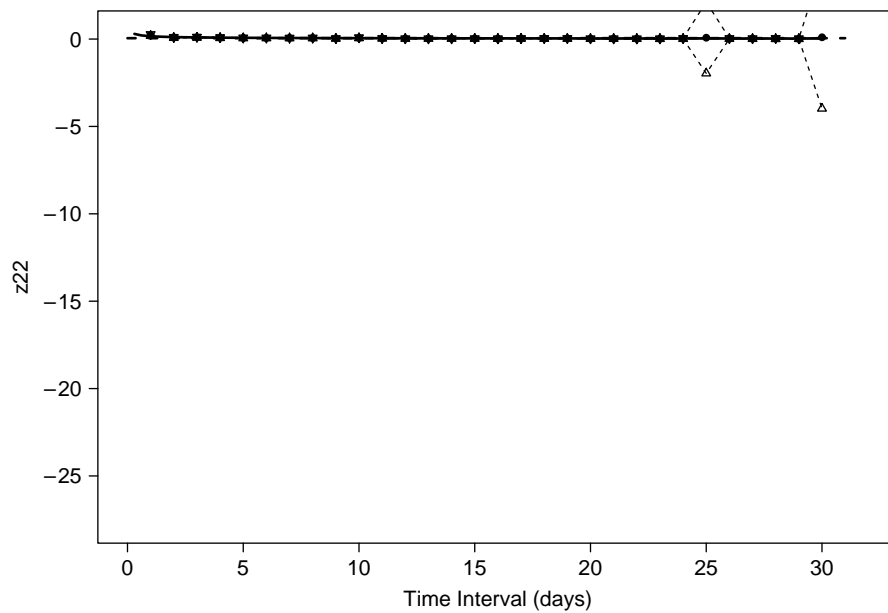

Figure S1.41. MLE of  $z_{22}$  by Time Interval Compared to Overall Mean ( $0.0501$ ) for  $p = 2$  and  $f(t) = t$ .

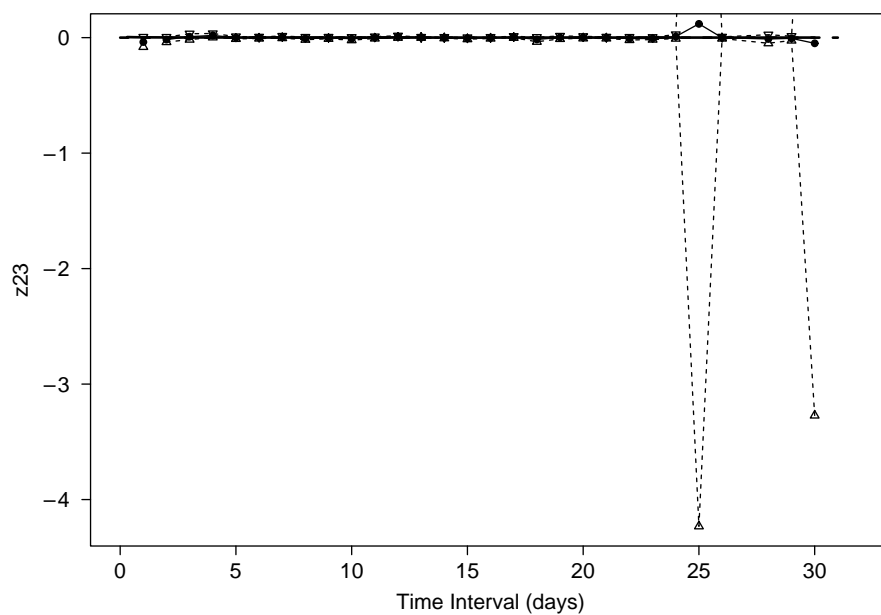

Figure S1.42. MLE of  $z_{23}$  by Time Interval Compared to Overall Mean ( $1e-04$ ) for  $p = 2$  and  $f(t) = t$ .

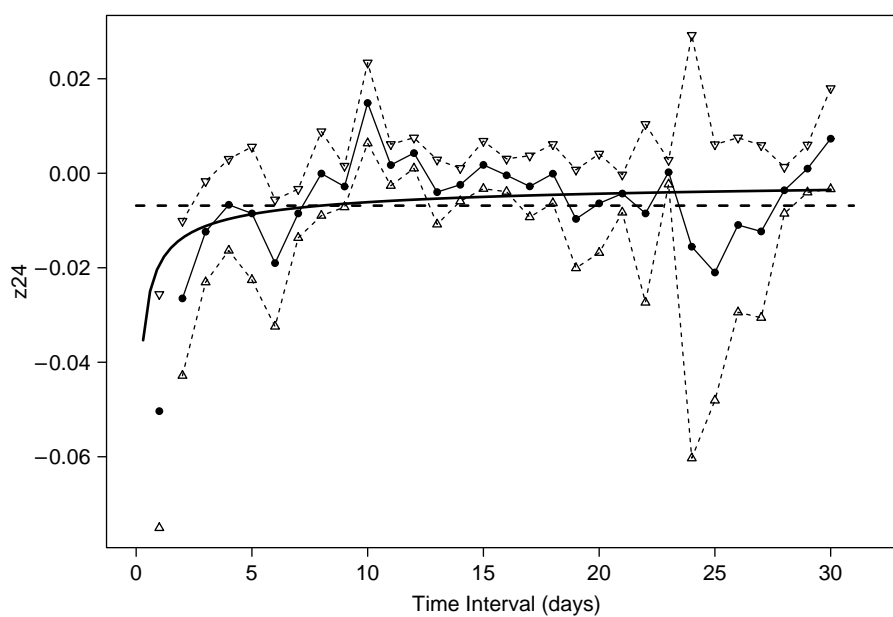

Figure S1.43. MLE of  $z_{24}$  by Time Interval Compared to Overall Mean ( $-0.0069$ ) for  $p = 2$  and  $f(t) = t$ .

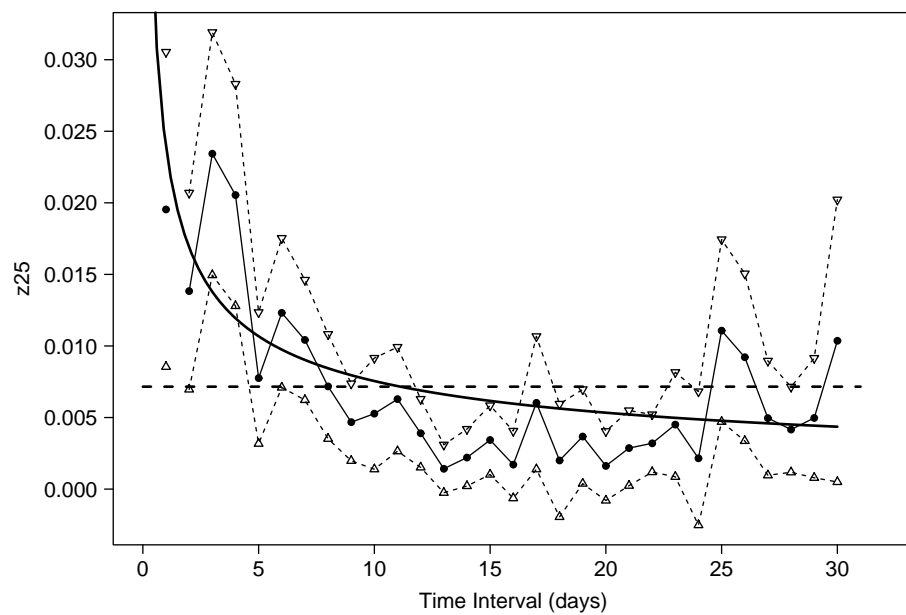

Figure S1.44. MLE of  $z_{25}$  by Time Interval Compared to Overall Mean (0.0072) for  $p = 2$  and  $f(t) = t$ .

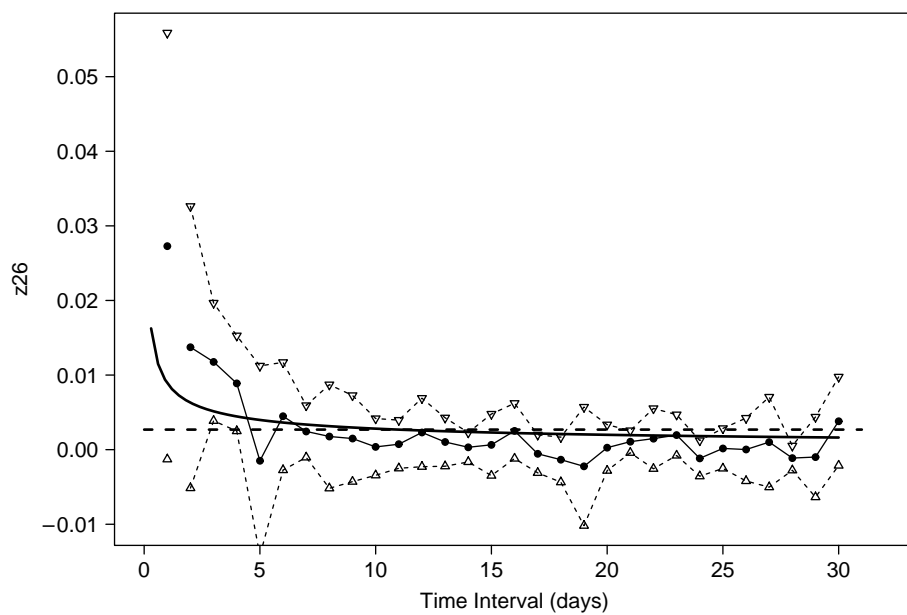

Figure S1.45. MLE of  $z_{26}$  by Time Interval Compared to Overall Mean (0.0027) for  $p = 2$  and  $f(t) = t$ .

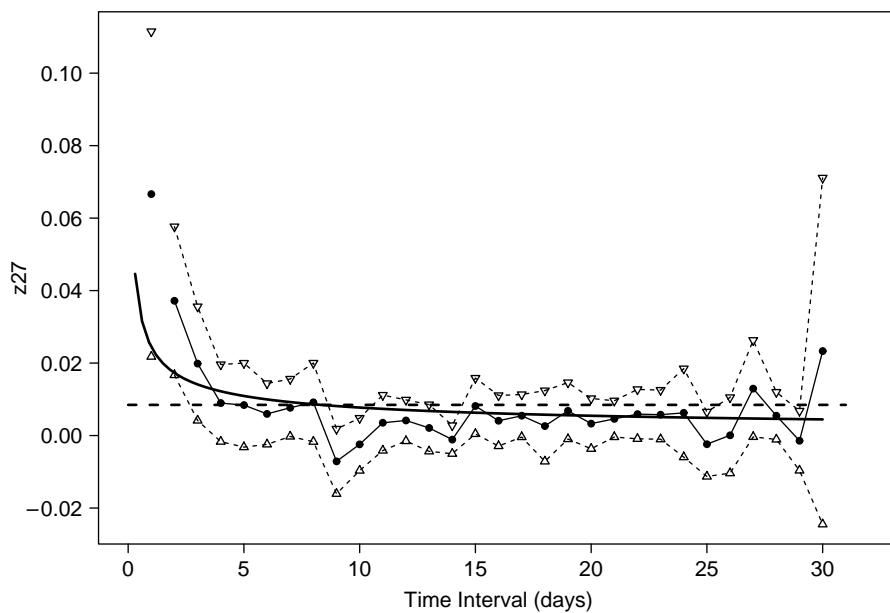

Figure S1.46. MLE of  $z_{27}$  by Time Interval Compared to Overall Mean (0.0085) for  $p = 2$  and  $f(t) = t$ .

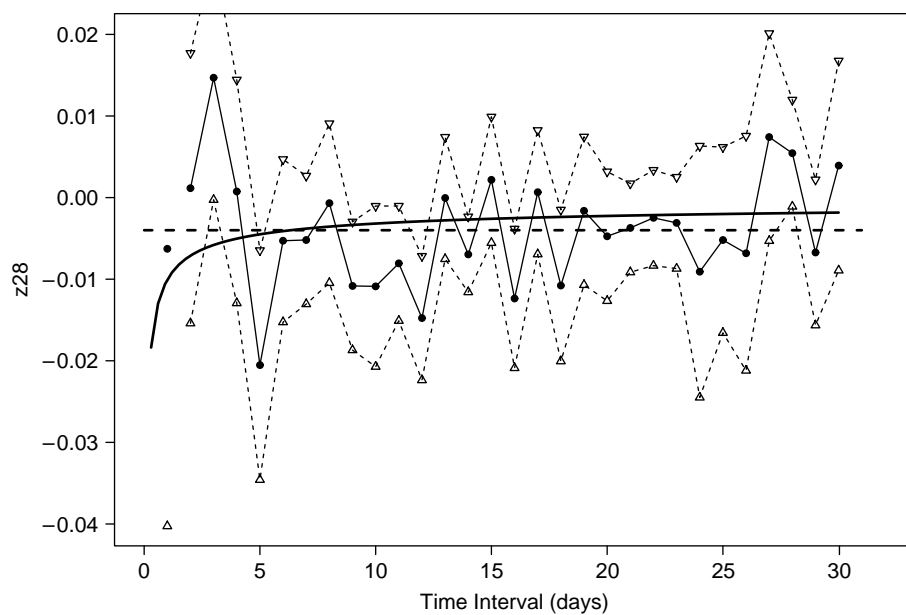

Figure S1.47. MLE of  $z_{28}$  by Time Interval Compared to Overall Mean (-0.004) for  $p = 2$  and  $f(t) = t$ .



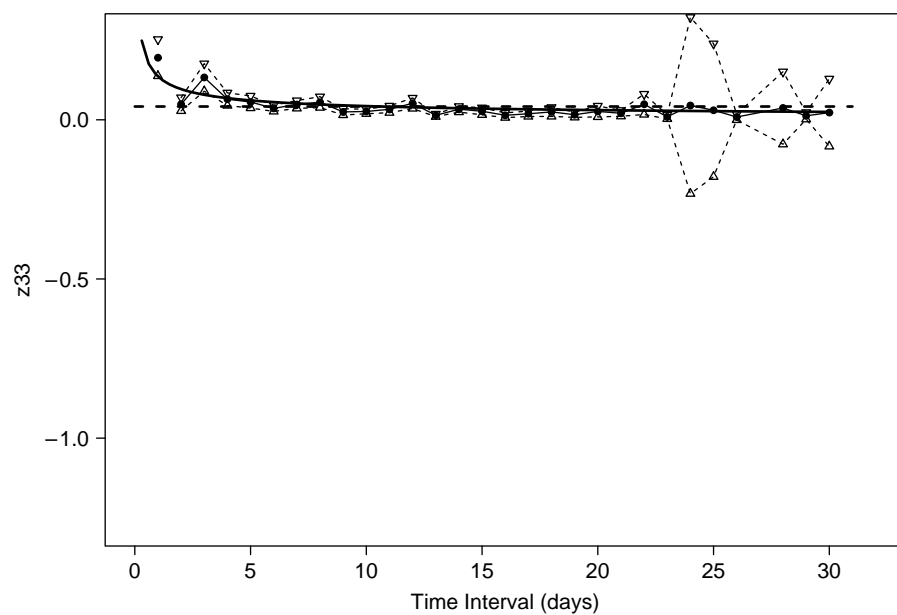

Figure S1.48. MLE of  $z_{33}$  by Time Interval Compared to Overall Mean (0.0418) for  $p = 2$  and  $f(t) = t$ .

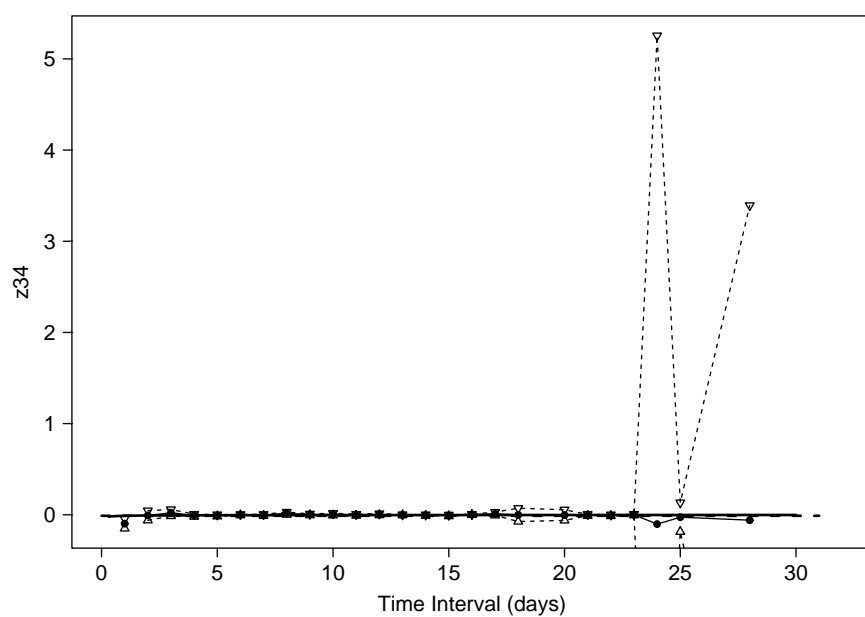

Figure S1.49. MLE of  $z_{34}$  by Time Interval Compared to Overall Mean ( $-0.0109$ ) for  $p = 2$  and  $f(t) = t$ .

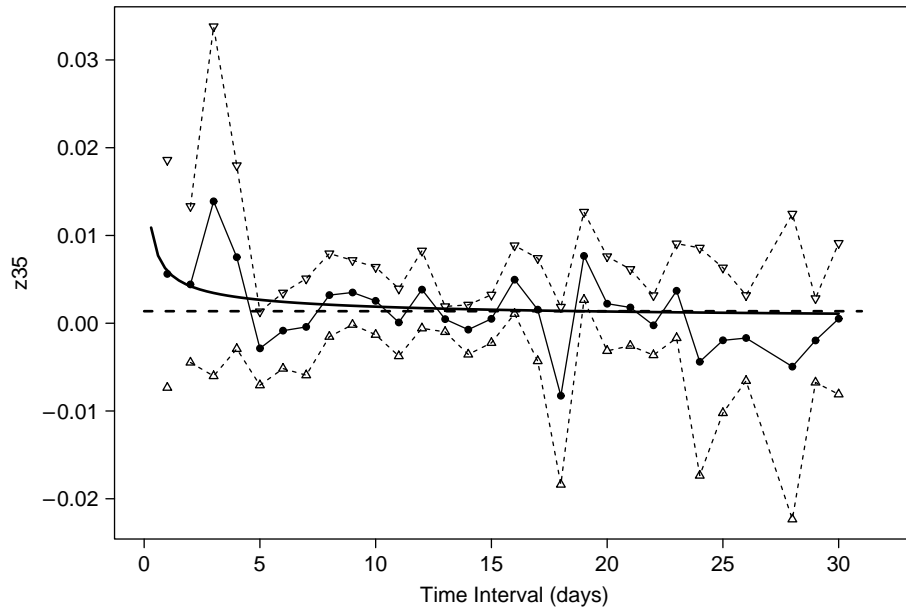

Figure S1.50. MLE of  $z_{35}$  by Time Interval Compared to Overall Mean (0.0014) for  $p = 2$  and  $f(t) = t$ .

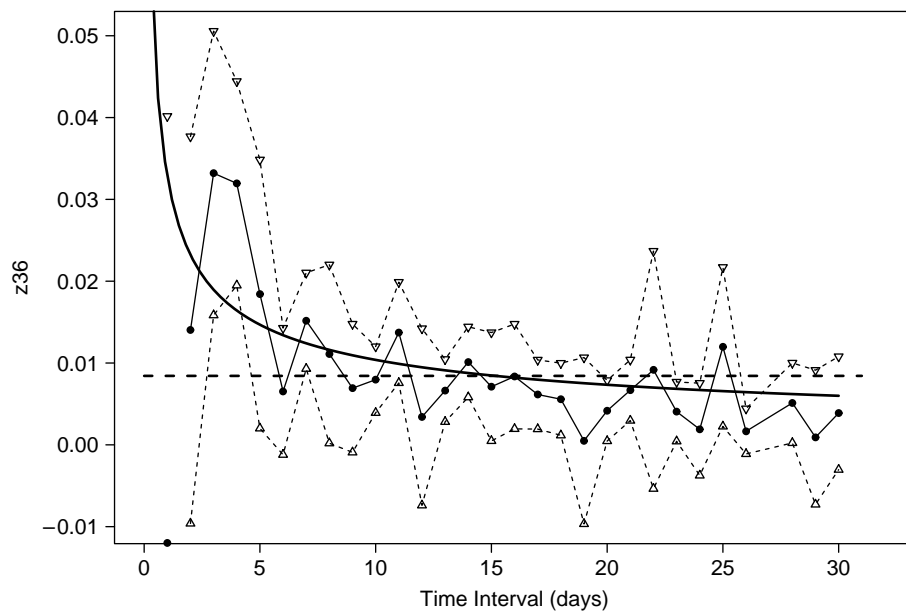

Figure S1.51. MLE of  $z_{36}$  by Time Interval Compared to Overall Mean (0.0084) for  $p = 2$  and  $f(t) = t$ .

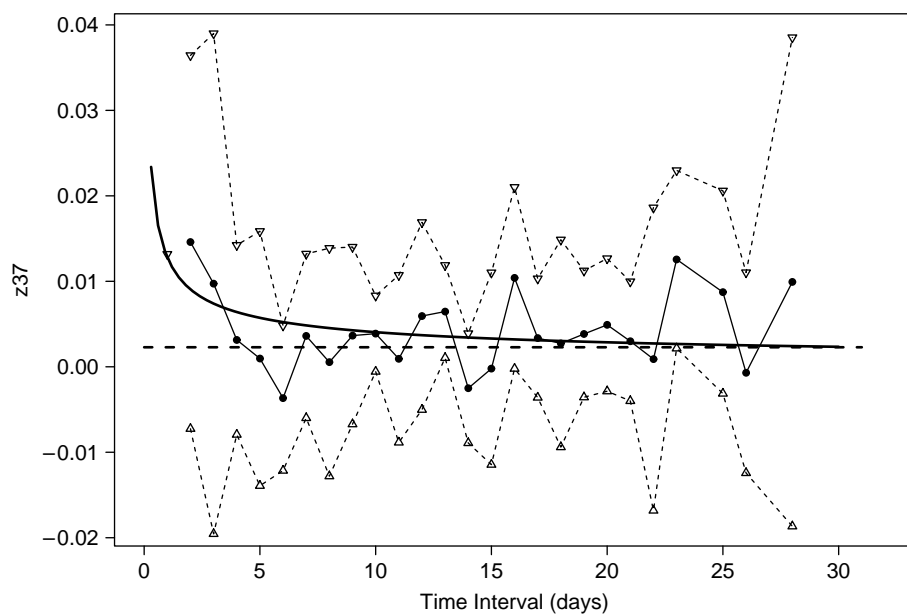

Figure S1.52. MLE of  $z_{37}$  by Time Interval Compared to Overall Mean (0.0023) for  $p = 2$  and  $f(t) = t$ .

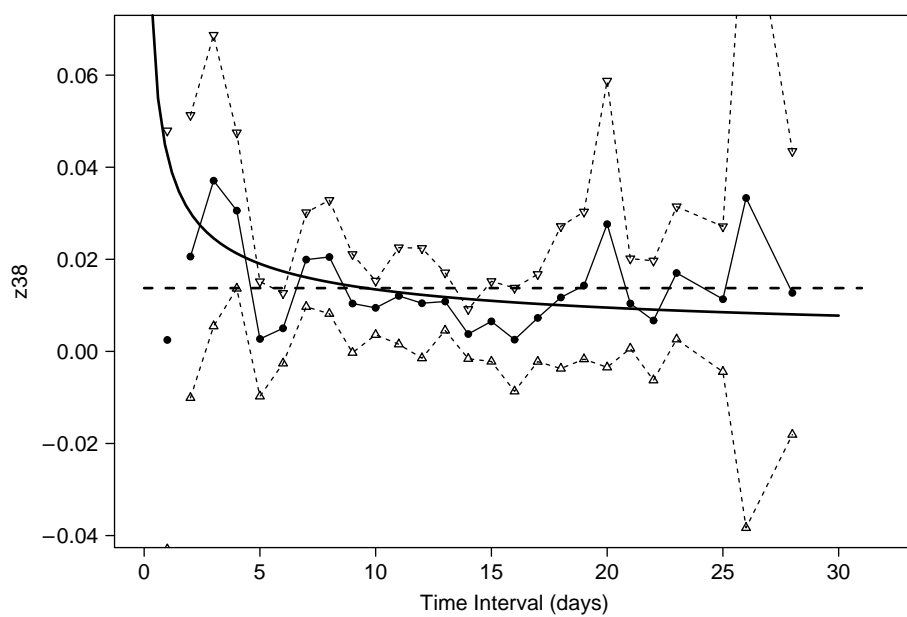

Figure S1.53. MLE of  $z_{38}$  by Time Interval Compared to Overall Mean (0.0137) for  $p = 2$  and  $f(t) = t$ .

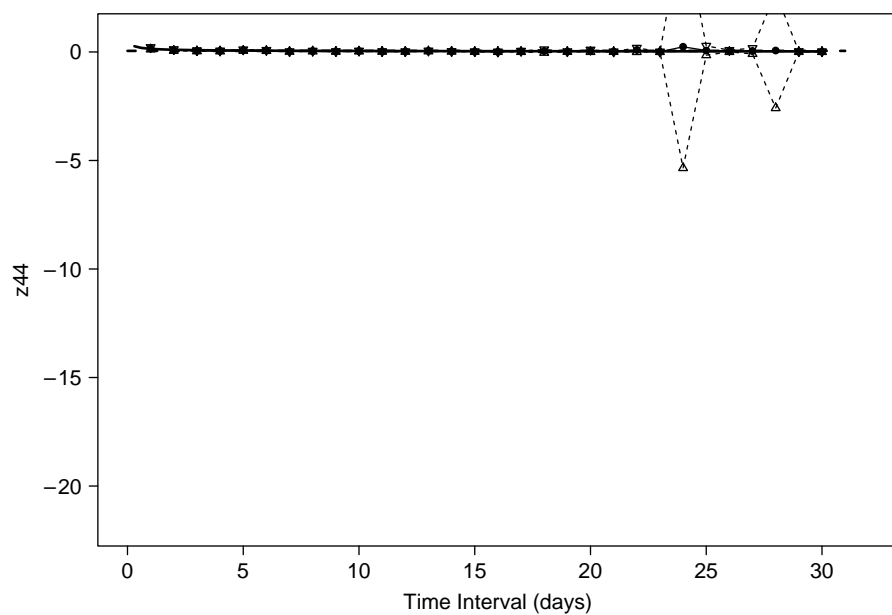

Figure S1.54. MLE of  $z_{44}$  by Time Interval Compared to Overall Mean (0.0496) for  $p = 2$  and  $f(t) = t$ .

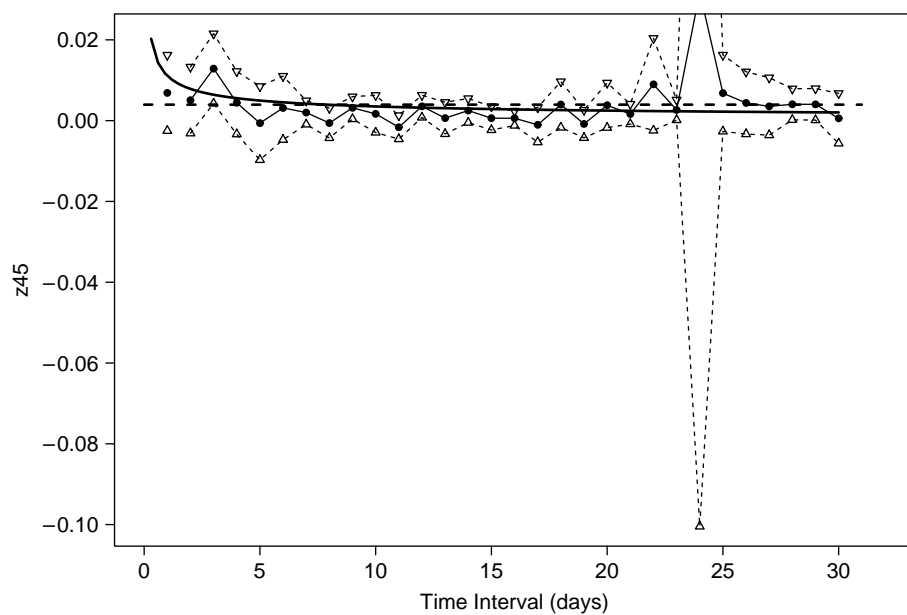

Figure S1.55. MLE of  $z_{45}$  by Time Interval Compared to Overall Mean (0.004) for  $p = 2$  and  $f(t) = t$ .

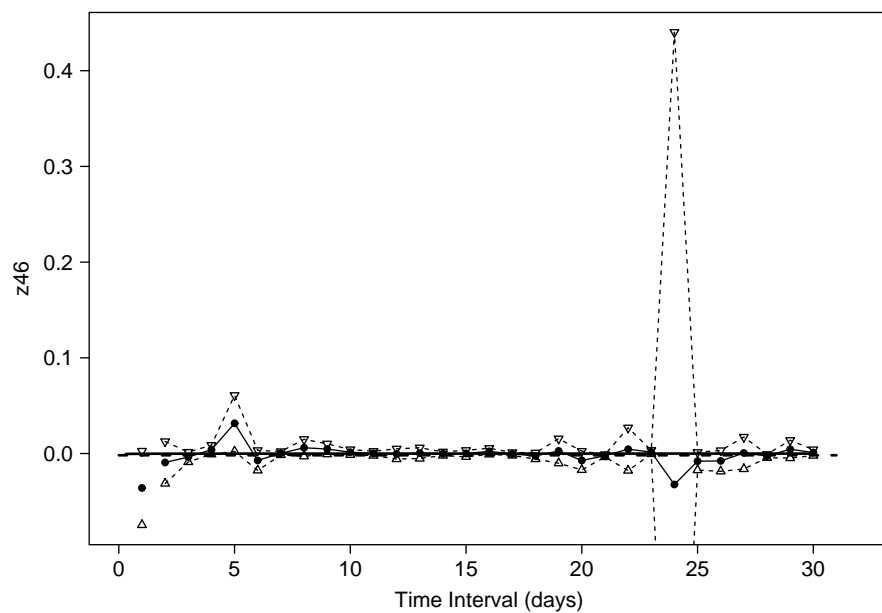

Figure S1.56. MLE of  $z_{46}$  by Time Interval Compared to Overall Mean ( $-0.0018$ ) for  $p = 2$  and  $f(t) = t$ .

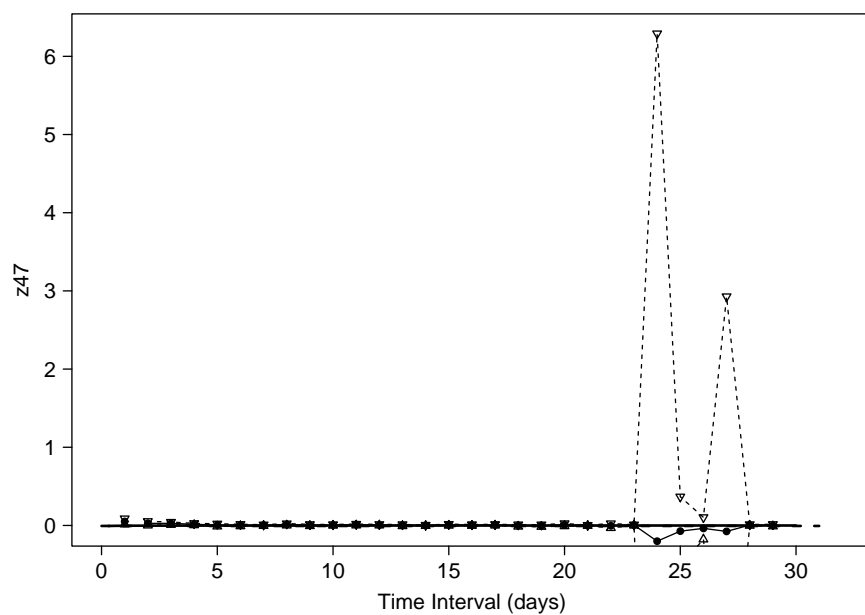

Figure S1.57. MLE of  $z_{47}$  by Time Interval Compared to Overall Mean ( $-0.0064$ ) for  $p = 2$  and  $f(t) = t$ .

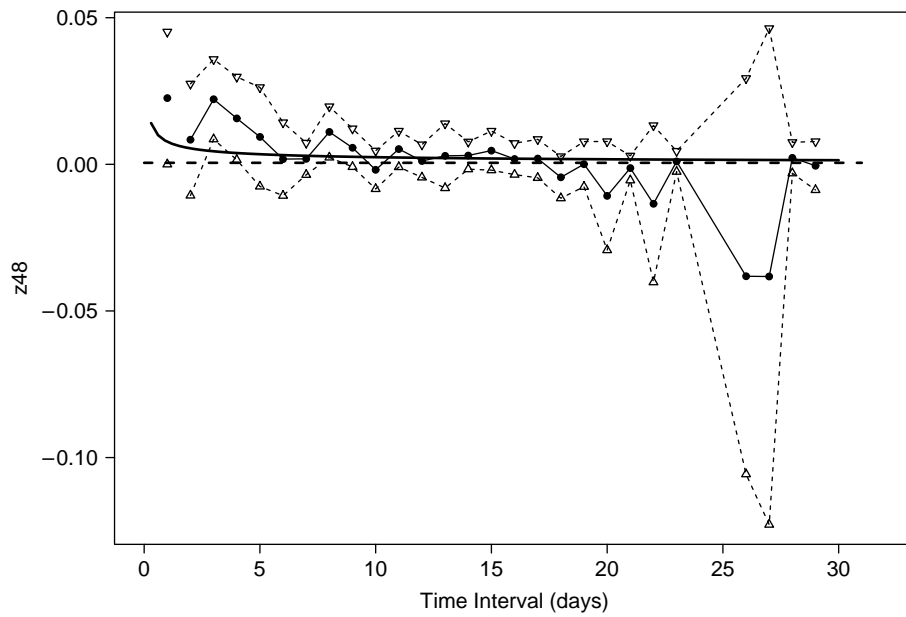

Figure S1.58. MLE of  $z_{48}$  by Time Interval Compared to Overall Mean ( $5e-04$ ) for  $p = 2$  and  $f(t) = t$ .

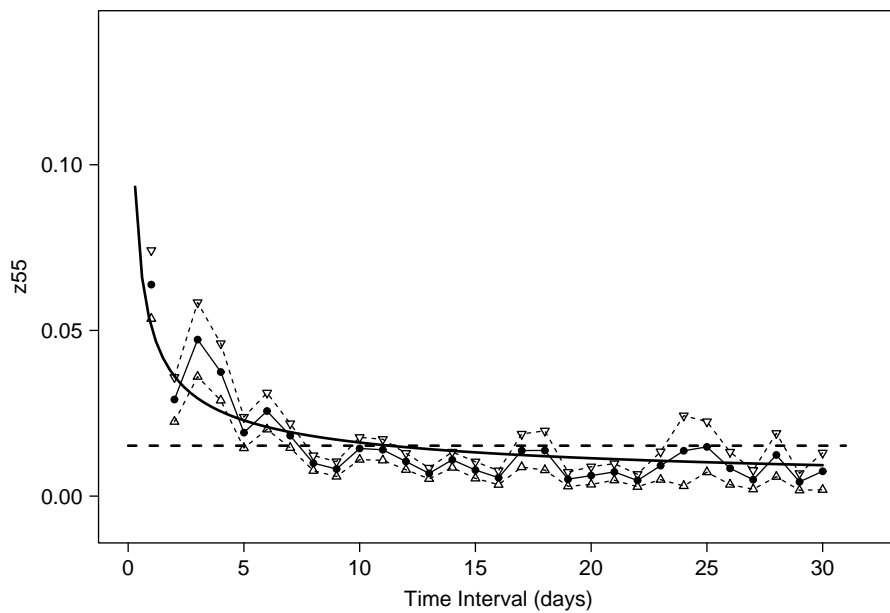

Figure S1.59. MLE of  $z_{55}$  by Time Interval Compared to Overall Mean ( $0.0152$ ) for  $p = 2$  and  $f(t) = t$ .

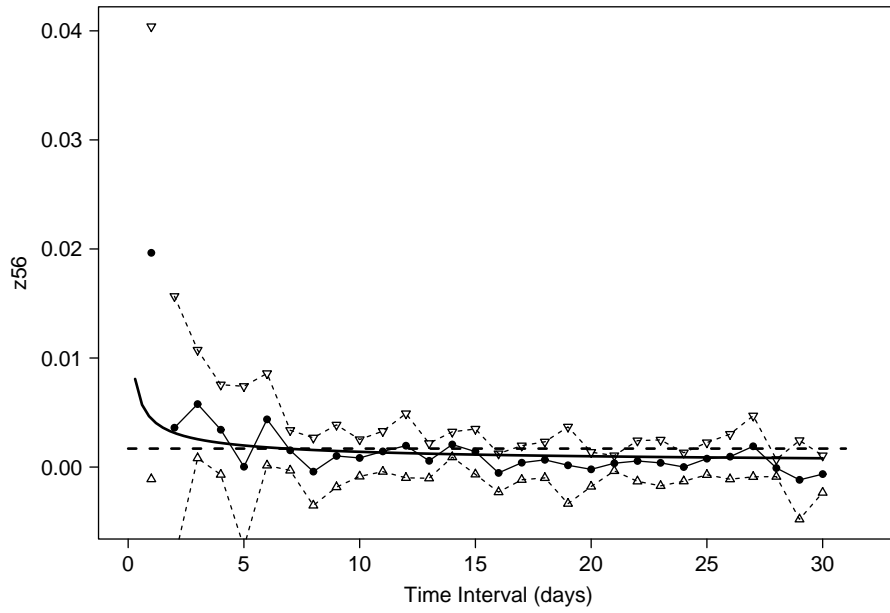

Figure S1.60. MLE of  $z_{56}$  by Time Interval Compared to Overall Mean (0.0017) for  $p = 2$  and  $f(t) = t$ .

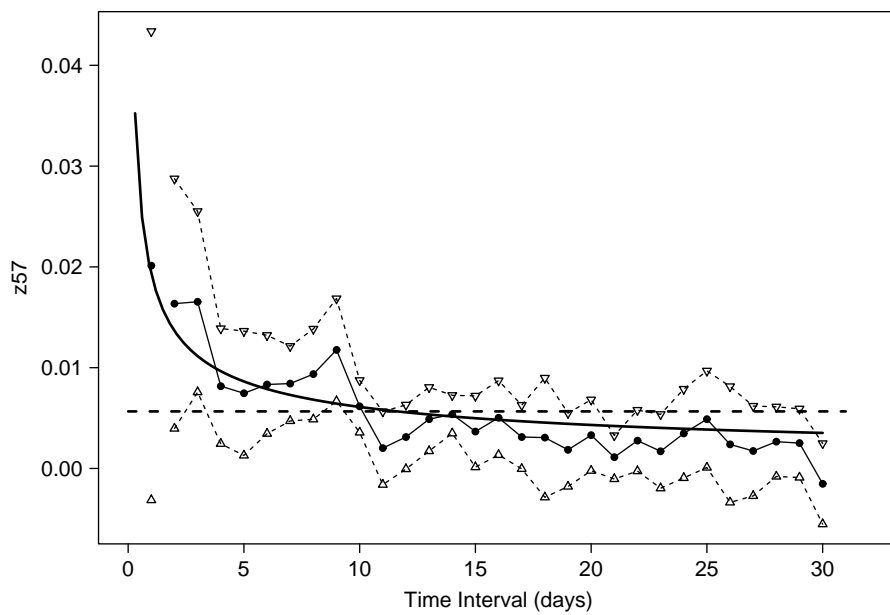

Figure S1.61. MLE of  $z_{57}$  by Time Interval Compared to Overall Mean (0.0057) for  $p = 2$  and  $f(t) = t$ .

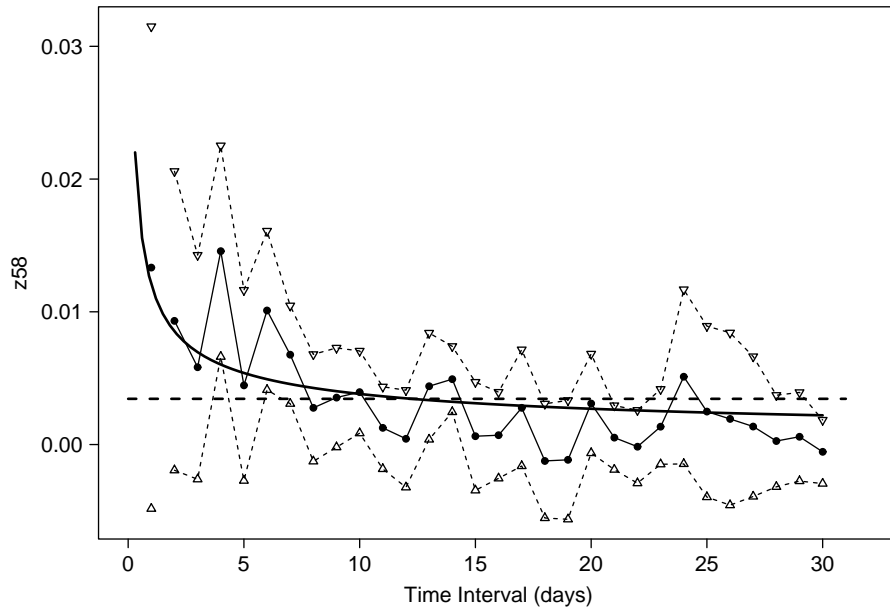

Figure S1.62. MLE of  $z_{58}$  by Time Interval Compared to Overall Mean (0.0034) for  $p = 2$  and  $f(t) = t$ .

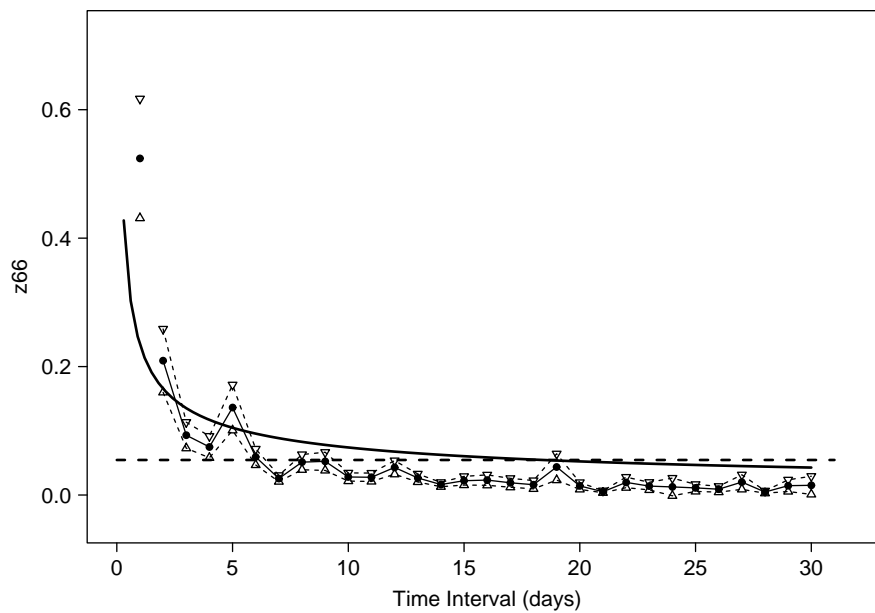

Figure S1.63. MLE of  $z_{66}$  by Time Interval Compared to Overall Mean (0.0546) for  $p = 2$  and  $f(t) = t$ .



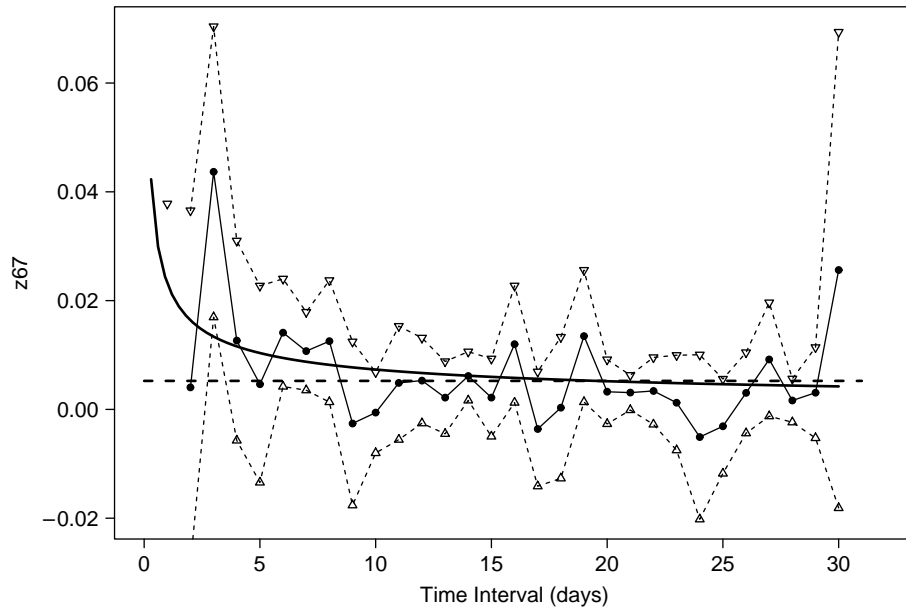

Figure S1.64. MLE of  $z_{67}$  by Time Interval Compared to Overall Mean (0.0052) for  $p = 2$  and  $f(t) = t$ .

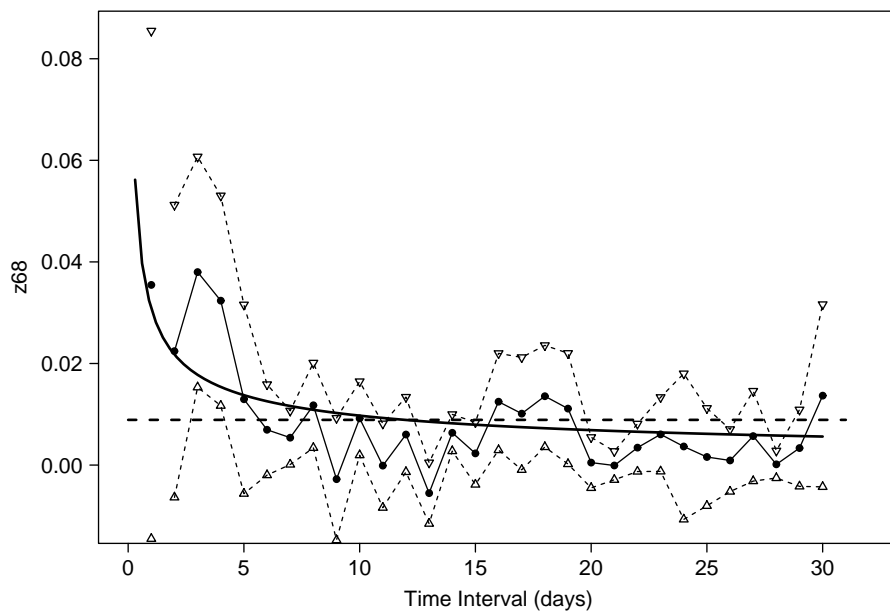

Figure S1.65. MLE of  $z_{68}$  by Time Interval Compared to Overall Mean (0.0089) for  $p = 2$  and  $f(t) = t$ .

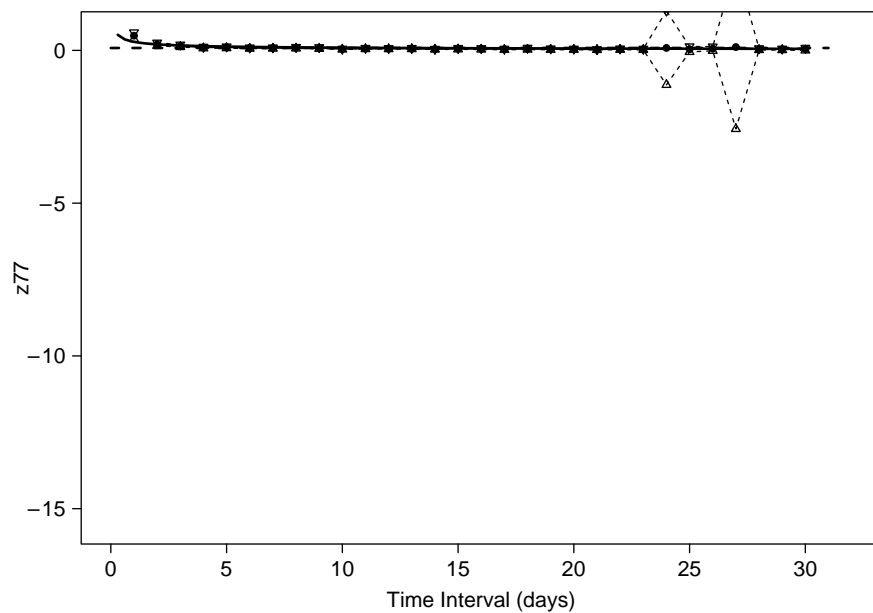

Figure S1.66. MLE of  $z_{77}$  by Time Interval Compared to Overall Mean (0.0783) for  $p = 2$  and  $f(t) = t$ .

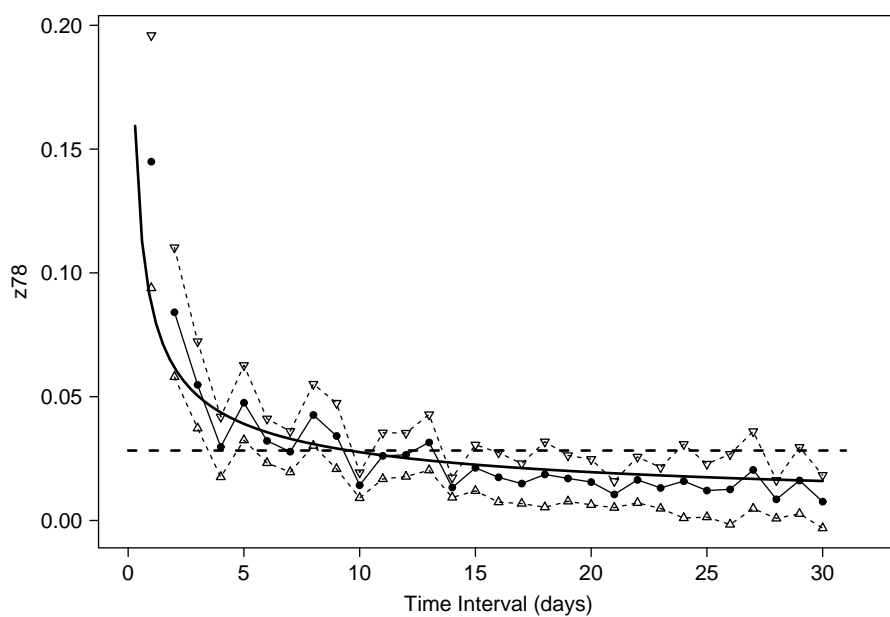

Figure S1.67. MLE of  $z_{78}$  by Time Interval Compared to Overall Mean (0.0282) for  $p = 2$  and  $f(t) = t$ .

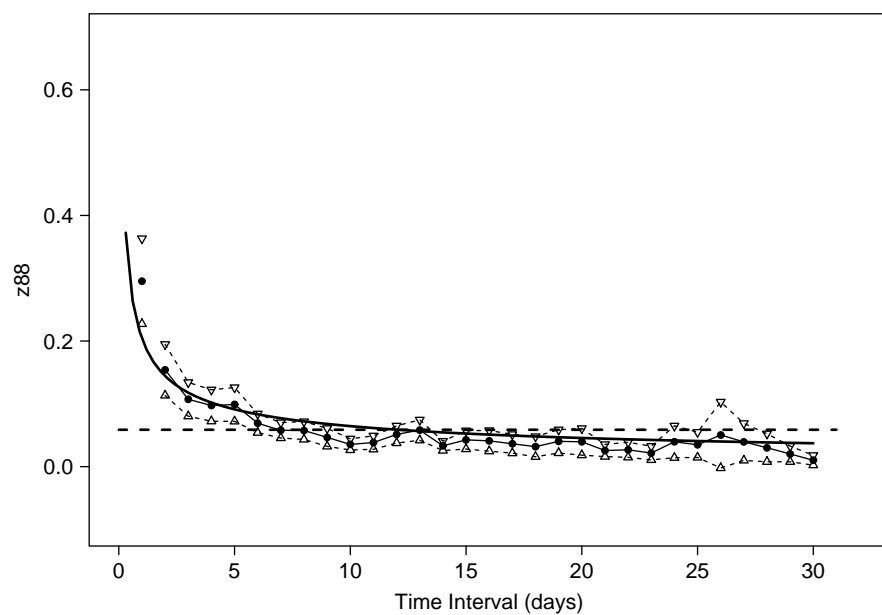

Figure S1.68. MLE of  $z_{88}$  by Time Interval Compared to Overall Mean (0.0587) for  $p = 2$  and  $f(t) = t$ .

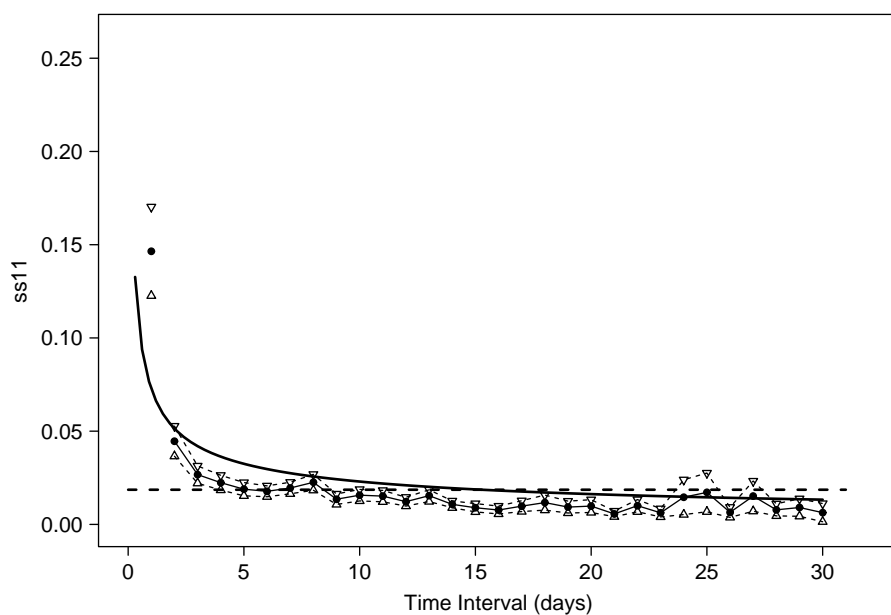

Figure S1.69. MLE of  $ss_{11}$  by Time Interval Compared to Overall Mean (0.0186) for  $p = 2$  and  $f(t) = t$ .

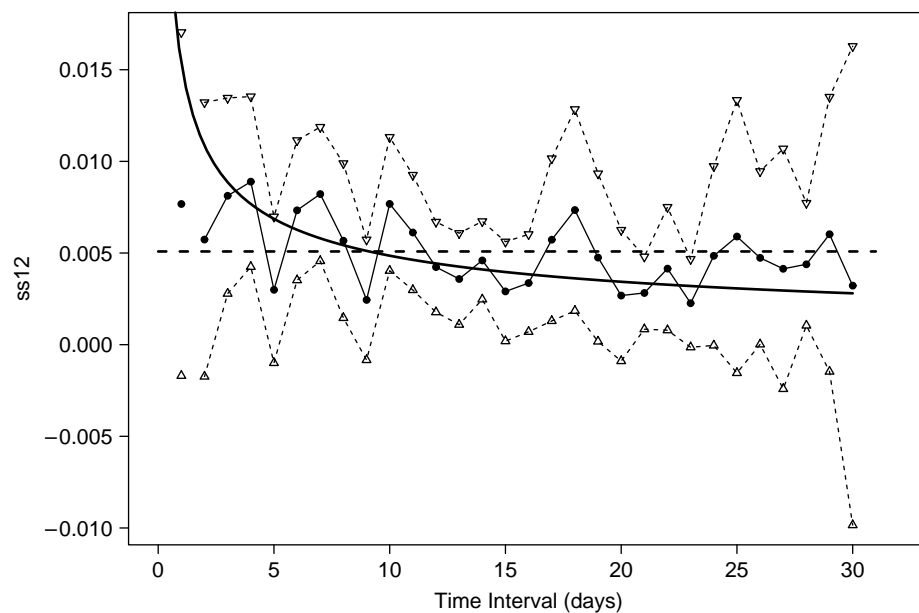

Figure S1.70. MLE of  $ss_{12}$  by Time Interval Compared to Overall Mean (0.0051) for  $p = 2$  and  $f(t) = t$ .

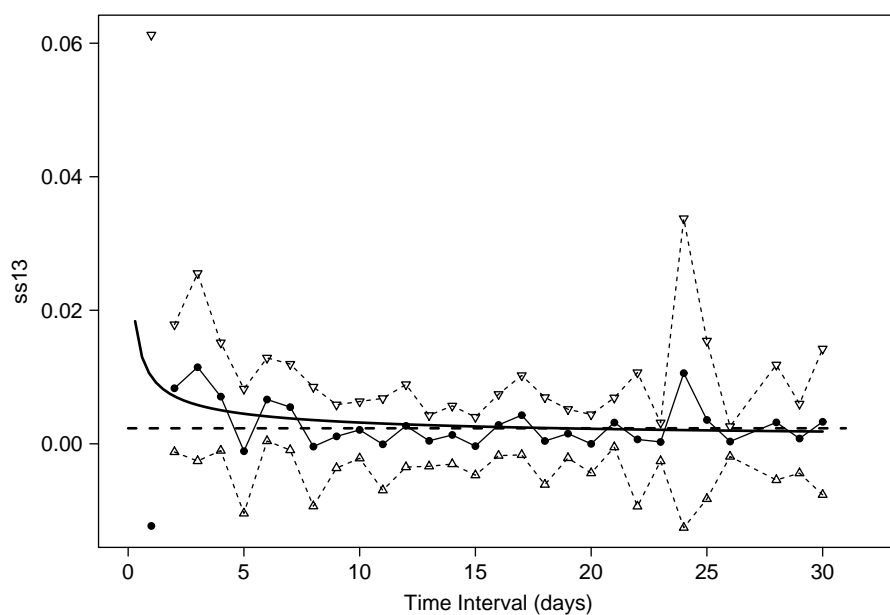

Figure S1.71. MLE of  $ss_{13}$  by Time Interval Compared to Overall Mean (0.0023) for  $p = 2$  and  $f(t) = t$ .

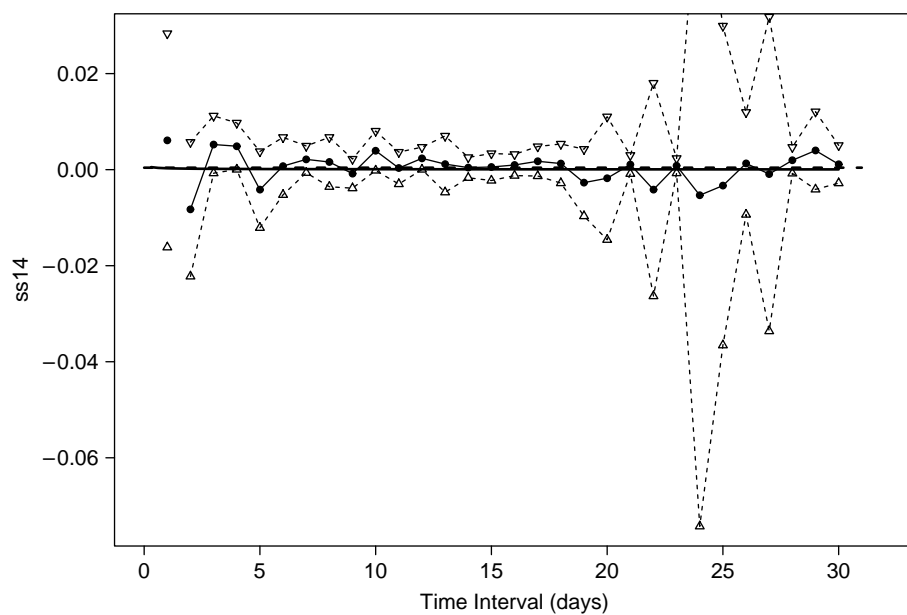

Figure S1.72. MLE of  $ss14$  by Time Interval Compared to Overall Mean ( $4e-04$ ) for  $p = 2$  and  $f(t) = t$ .

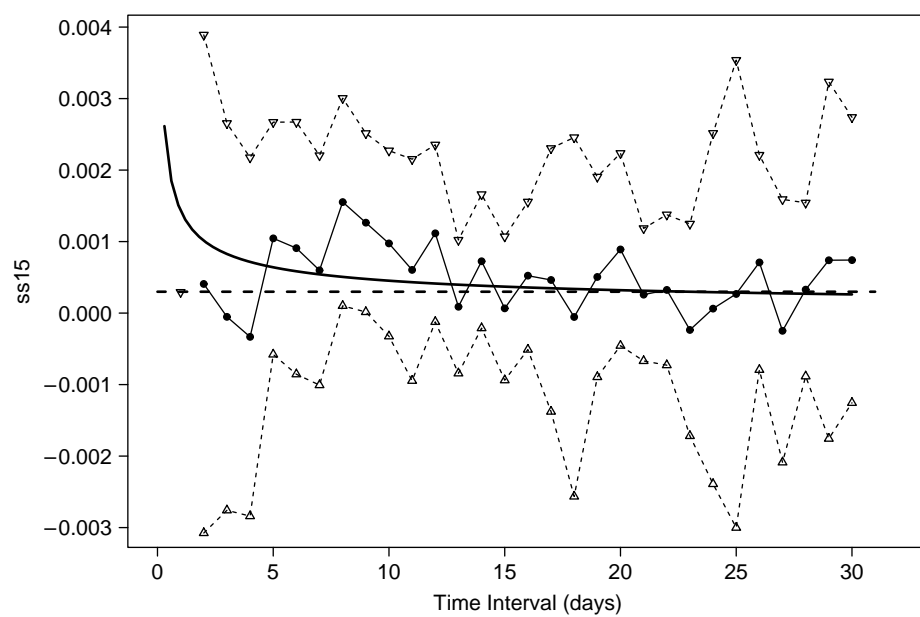

Figure S1.73. MLE of  $ss15$  by Time Interval Compared to Overall Mean ( $3e-04$ ) for  $p = 2$  and  $f(t) = t$ .

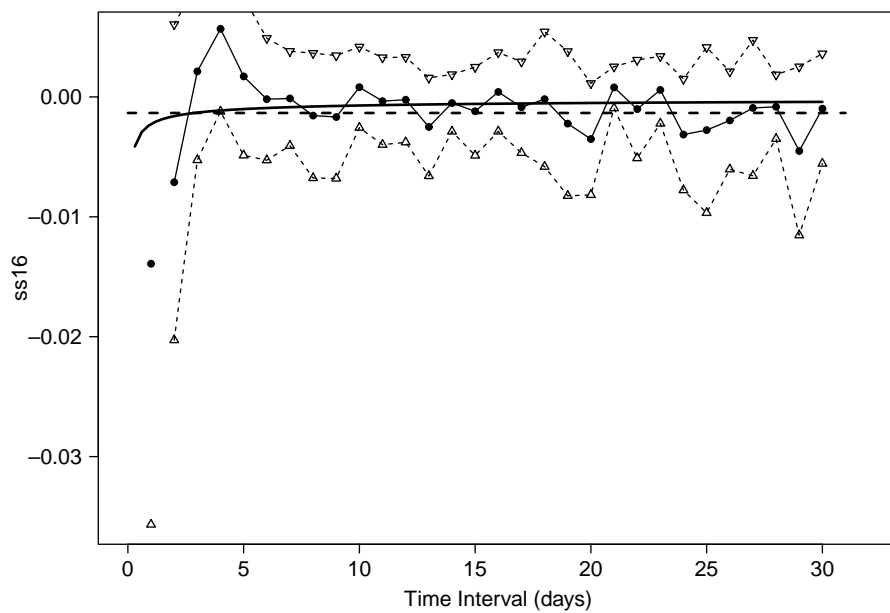

Figure S1.74. MLE of  $ss_{16}$  by Time Interval Compared to Overall Mean ( $-0.0013$ ) for  $p = 2$  and  $f(t) = t$ .

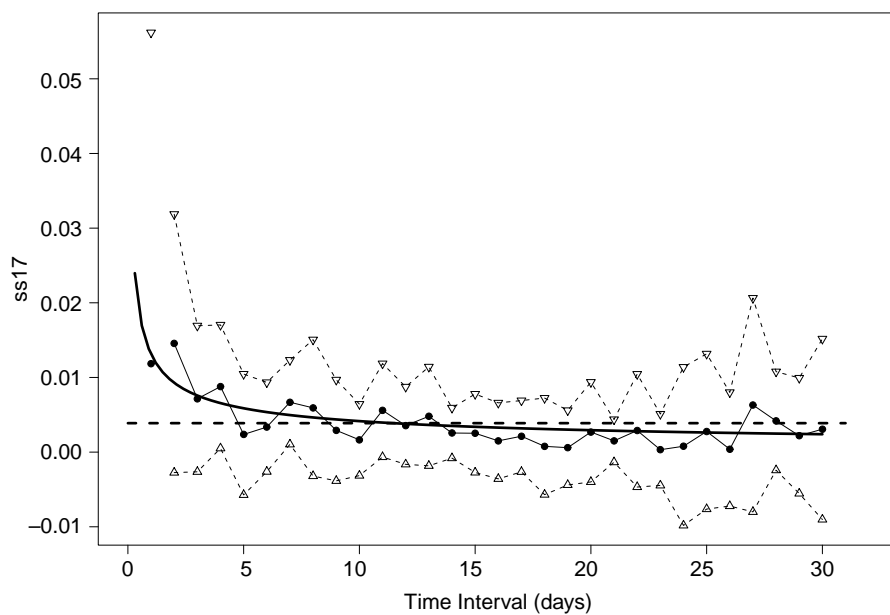

Figure S1.75. MLE of  $ss_{17}$  by Time Interval Compared to Overall Mean ( $0.0039$ ) for  $p = 2$  and  $f(t) = t$ .

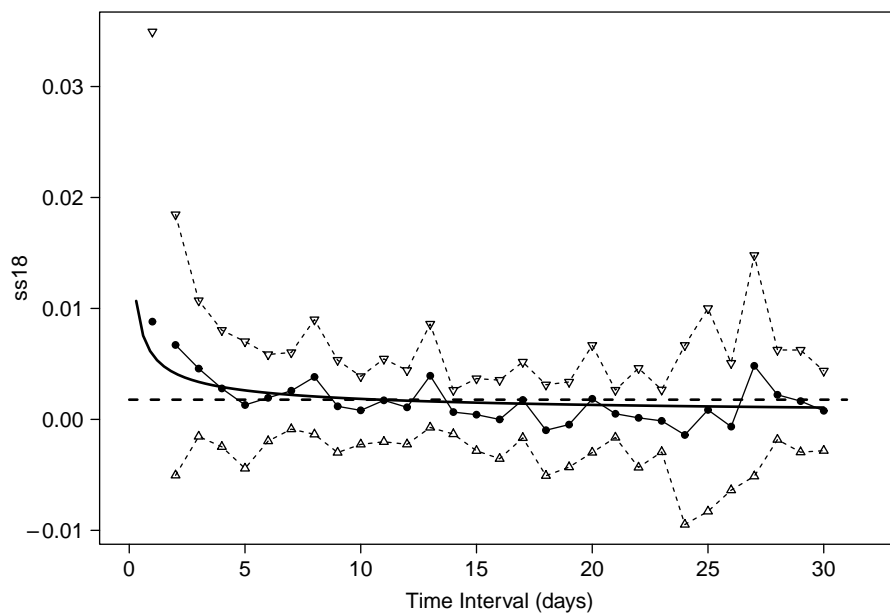

Figure S1.76. MLE of  $ss18$  by Time Interval Compared to Overall Mean (0.0018) for  $p = 2$  and  $f(t) = t$ .

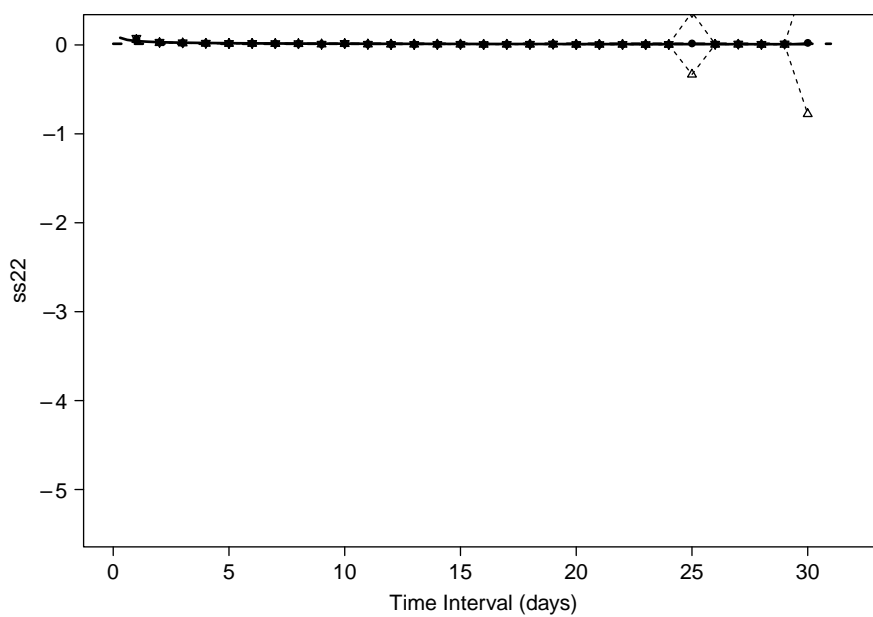

Figure S1.77. MLE of  $ss22$  by Time Interval Compared to Overall Mean (0.0129) for  $p = 2$  and  $f(t) = t$ .

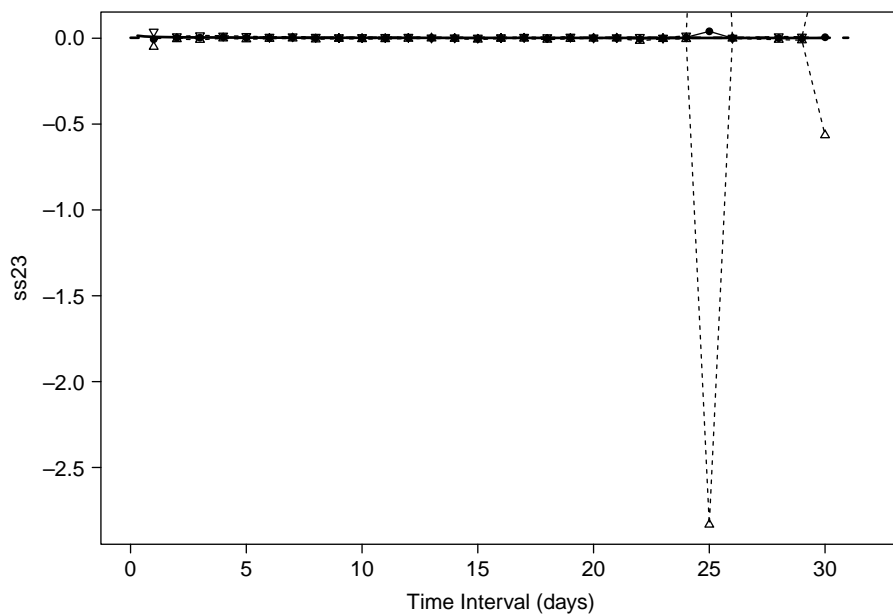

Figure S1.78. MLE of ss23 by Time Interval Compared to Overall Mean (0.0026) for  $p = 2$  and  $f(t) = t$ .

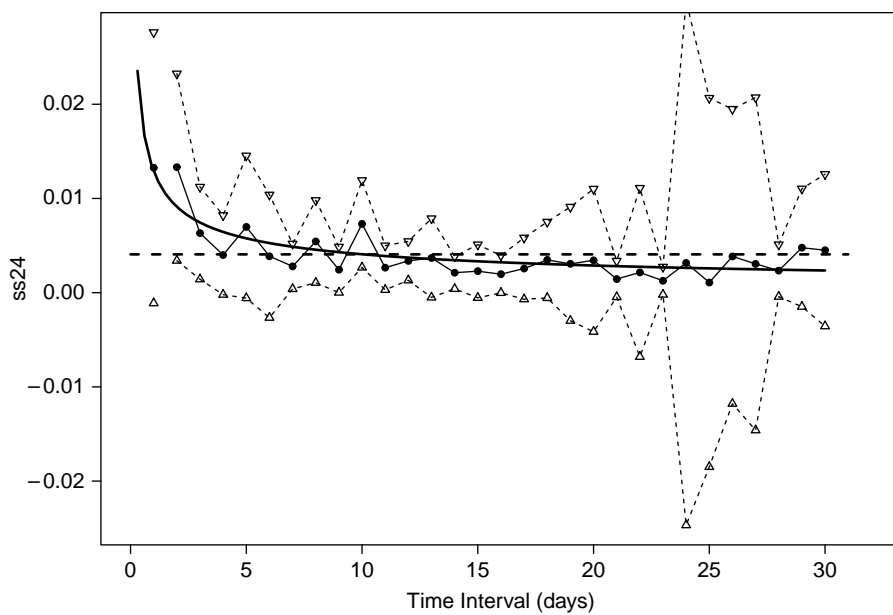

Figure S1.79. MLE of ss24 by Time Interval Compared to Overall Mean (0.0041) for  $p = 2$  and  $f(t) = t$ .



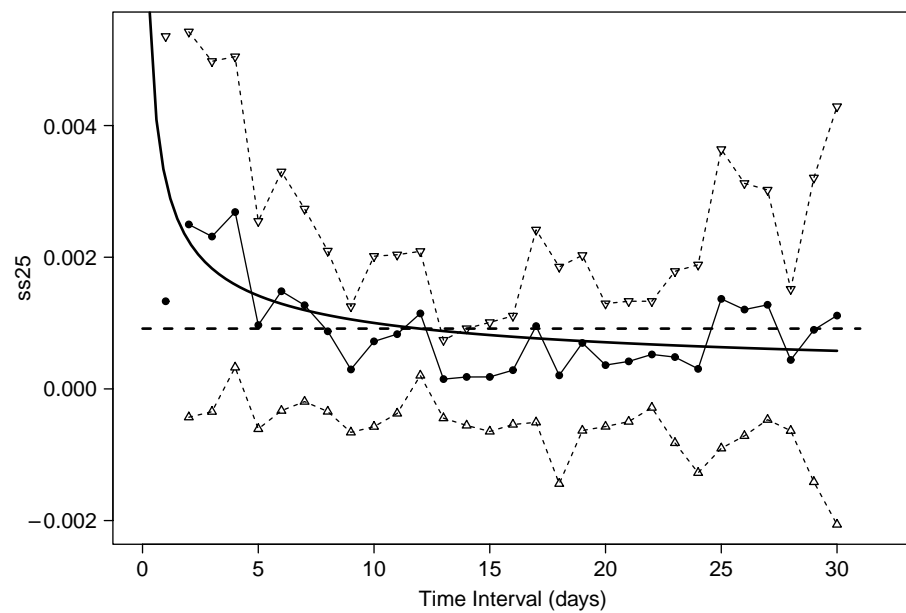

Figure S1.80. MLE of  $ss_{25}$  by Time Interval Compared to Overall Mean ( $9 \times 10^{-4}$ ) for  $p = 2$  and  $f(t) = t$ .

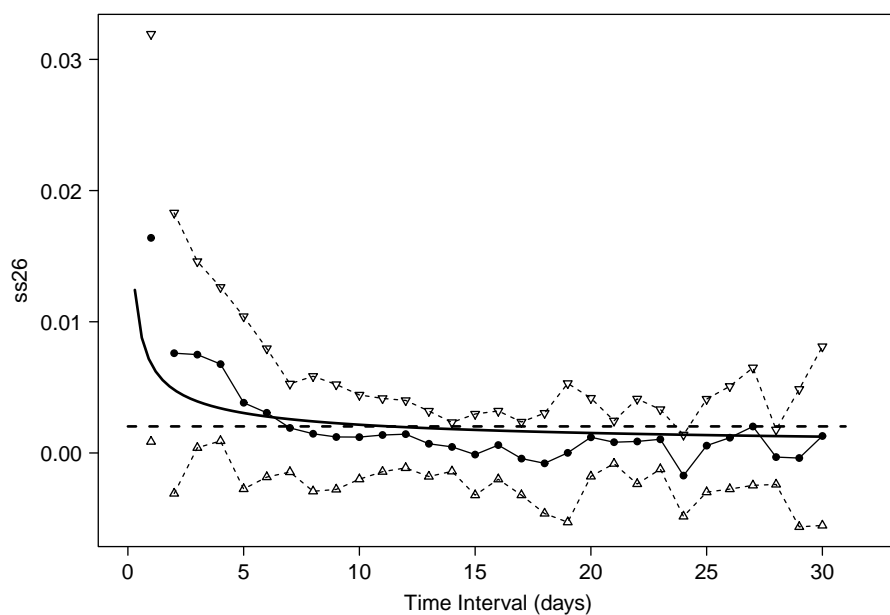

Figure S1.81. MLE of  $ss_{26}$  by Time Interval Compared to Overall Mean (0.002) for  $p = 2$  and  $f(t) = t$ .

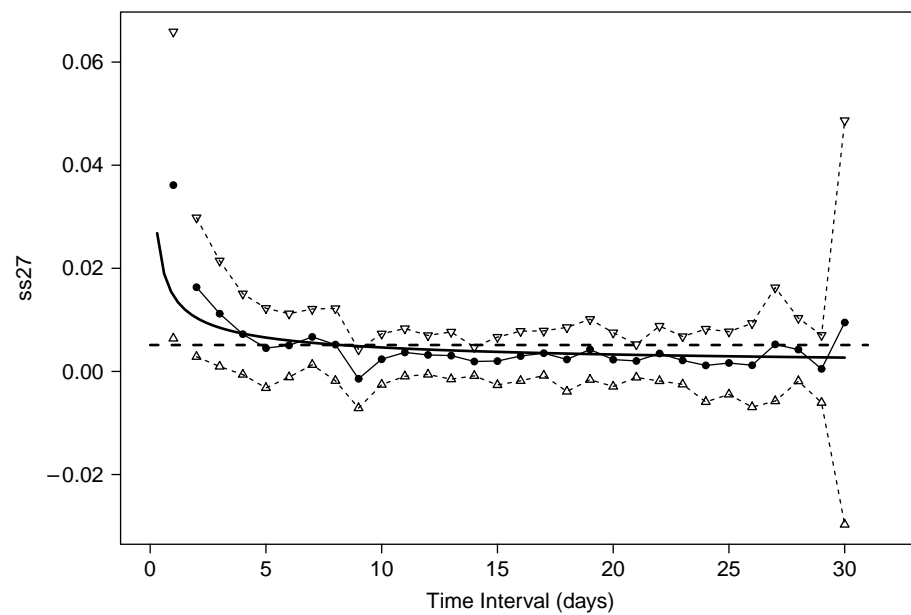

Figure S1.82. MLE of  $ss27$  by Time Interval Compared to Overall Mean (0.0051) for  $p = 2$  and  $f(t) = t$ .

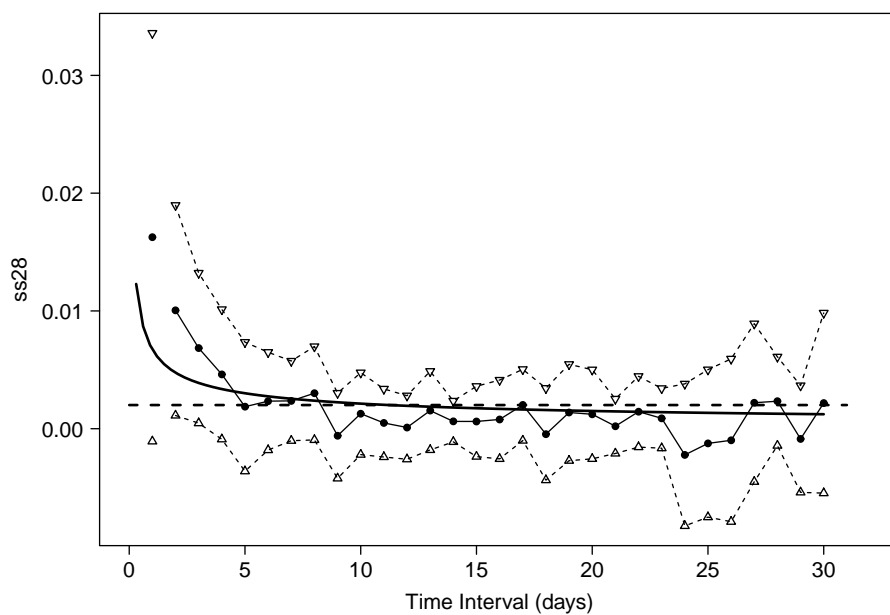

Figure S1.83. MLE of  $ss28$  by Time Interval Compared to Overall Mean (0.002) for  $p = 2$  and  $f(t) = t$ .

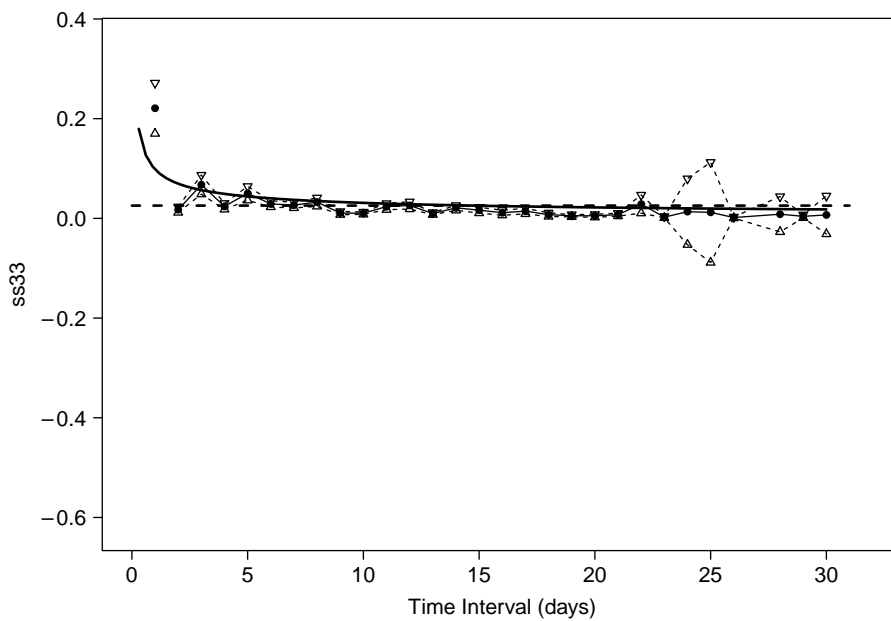

Figure S1.84. MLE of  $ss_{33}$  by Time Interval Compared to Overall Mean (0.0256) for  $p = 2$  and  $f(t) = t$ .

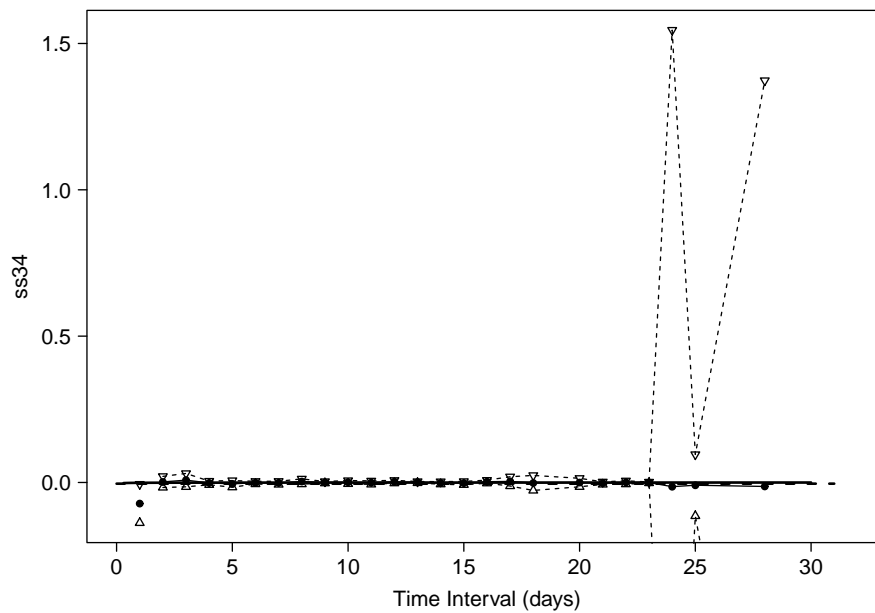

Figure S1.85. MLE of  $ss_{34}$  by Time Interval Compared to Overall Mean ( $-0.0041$ ) for  $p = 2$  and  $f(t) = t$ .

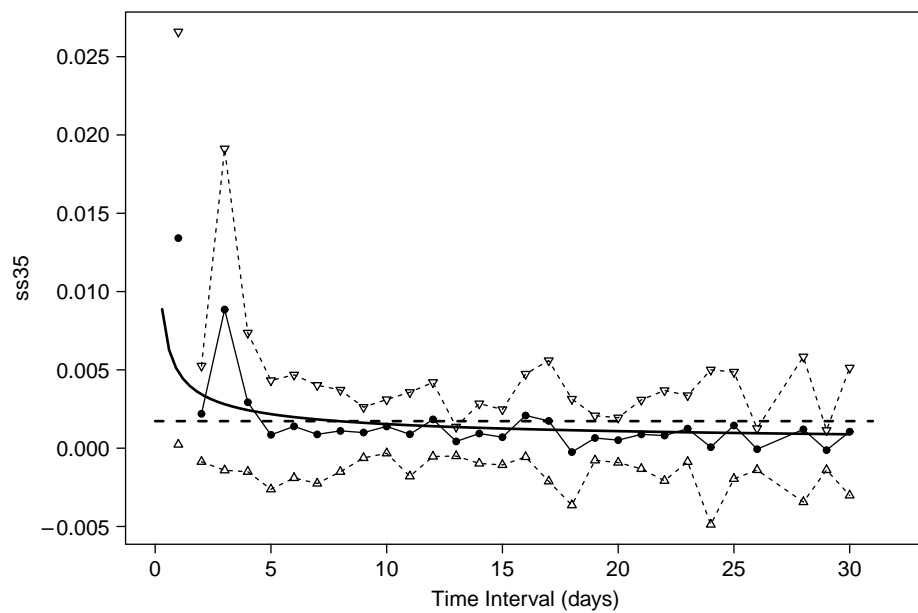

Figure S1.86. MLE of  $ss_{35}$  by Time Interval Compared to Overall Mean (0.0017) for  $p = 2$  and  $f(t) = t$ .

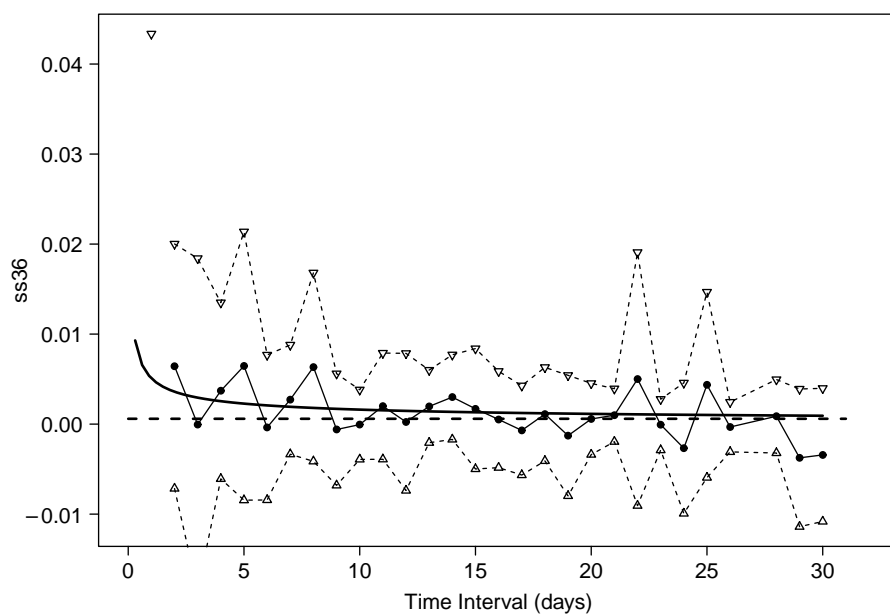

Figure S1.87. MLE of  $ss_{36}$  by Time Interval Compared to Overall Mean ( $6e-04$ ) for  $p = 2$  and  $f(t) = t$ .

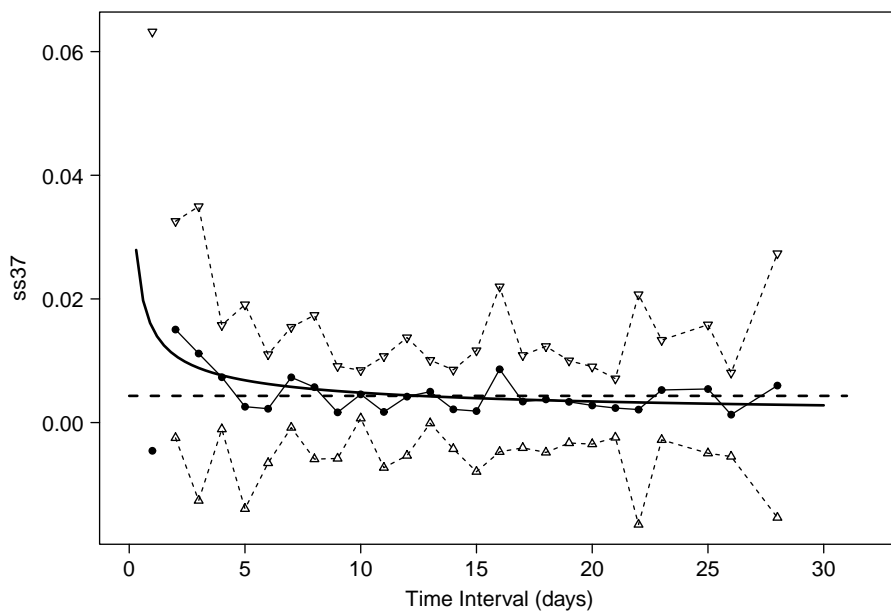

Figure S1.88. MLE of ss37 by Time Interval Compared to Overall Mean (0.0043) for  $p = 2$  and  $f(t) = t$ .

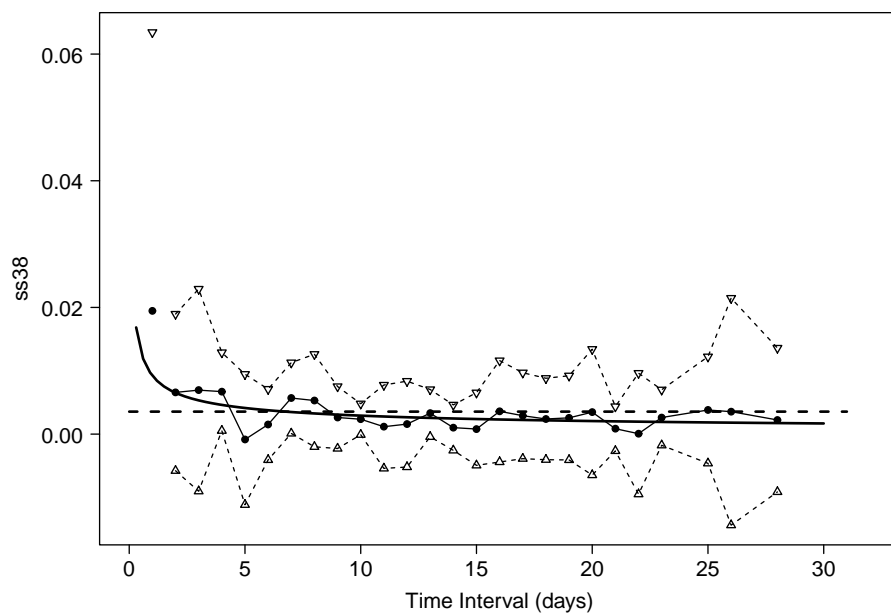

Figure S1.89. MLE of ss38 by Time Interval Compared to Overall Mean (0.0035) for  $p = 2$  and  $f(t) = t$ .

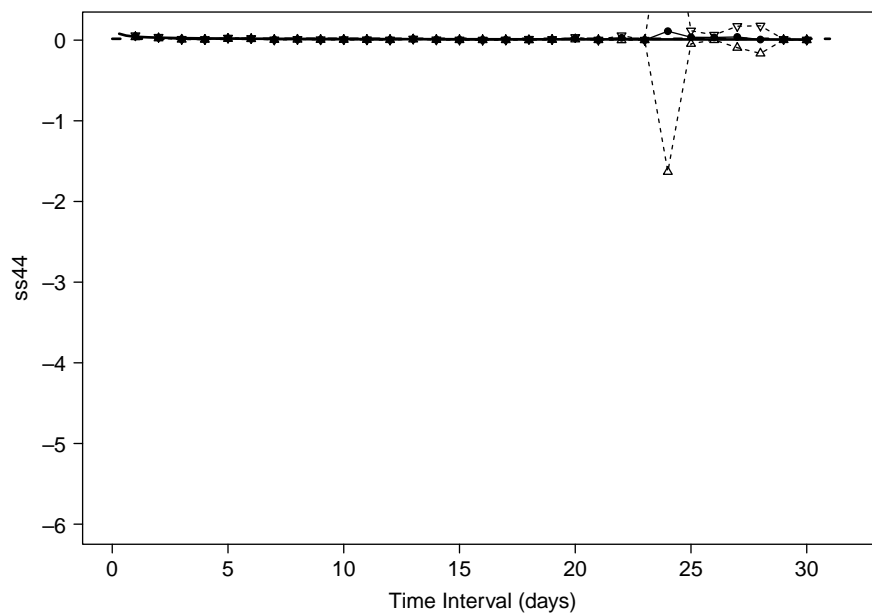

Figure S1.90. MLE of  $ss_{44}$  by Time Interval Compared to Overall Mean (0.0164) for  $p = 2$  and  $f(t) = t$ .

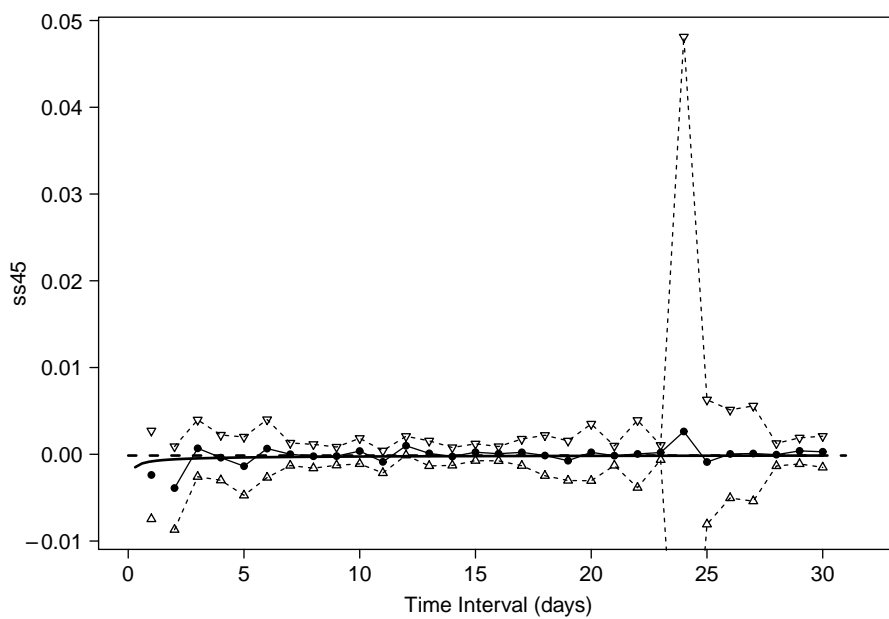

Figure S1.91. MLE of  $ss_{45}$  by Time Interval Compared to Overall Mean ( $-1 \times 10^{-4}$ ) for  $p = 2$  and  $f(t) = t$ .

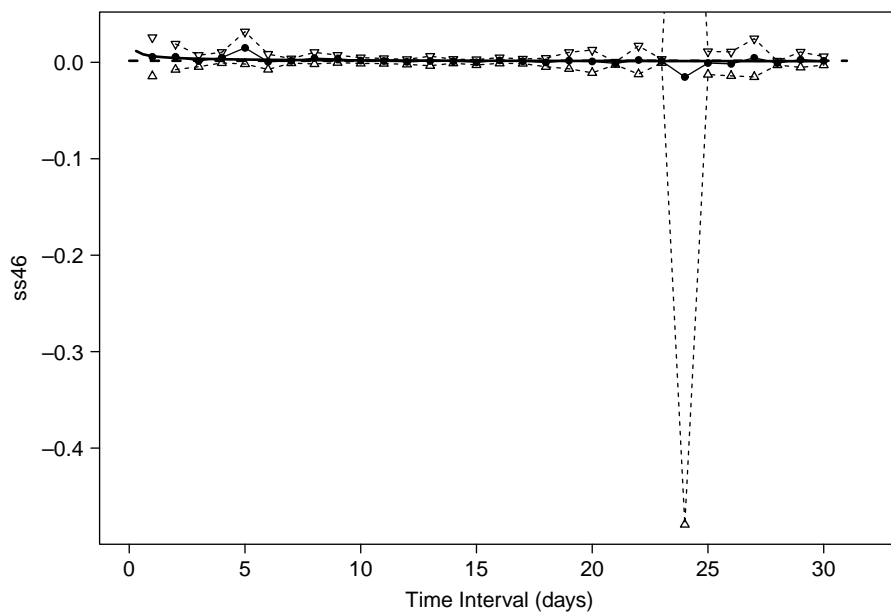

Figure S1.92. MLE of ss46 by Time Interval Compared to Overall Mean (0.0016) for  $p = 2$  and  $f(t) = t$ .

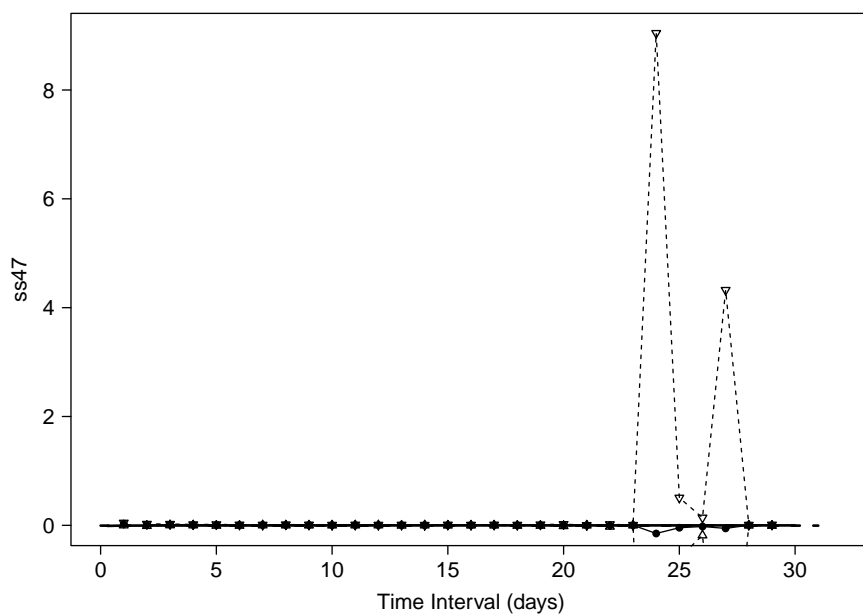

Figure S1.93. MLE of ss47 by Time Interval Compared to Overall Mean ( $-0.0053$ ) for  $p = 2$  and  $f(t) = t$ .

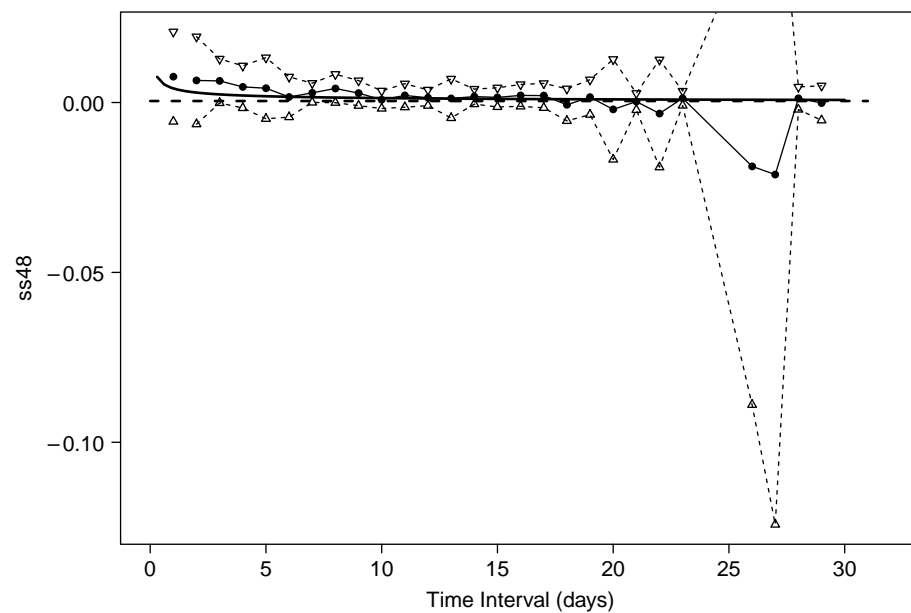

Figure S1.94. MLE of ss48 by Time Interval Compared to Overall Mean ( $4e-04$ ) for  $p = 2$  and  $f(t) = t$ .

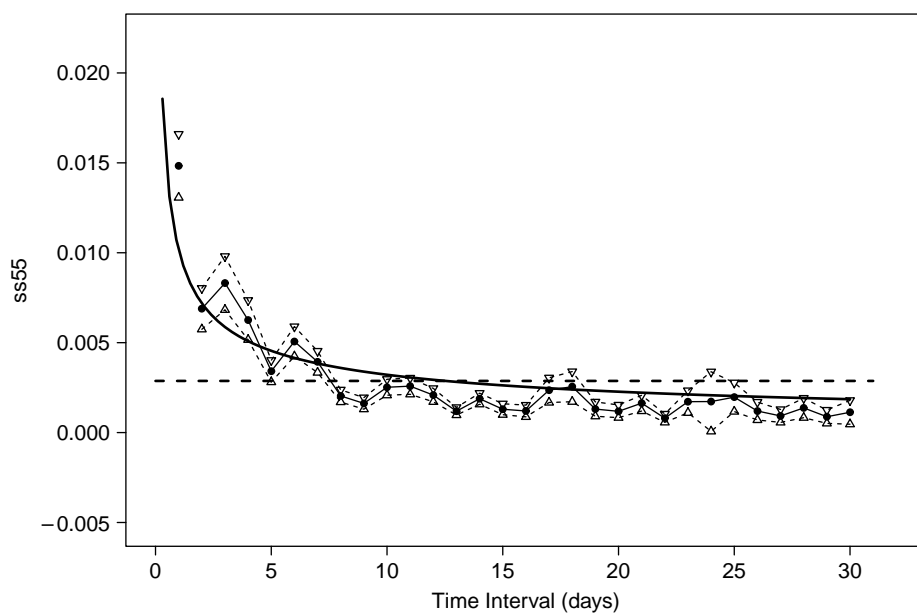

Figure S1.95. MLE of ss55 by Time Interval Compared to Overall Mean ( $0.0029$ ) for  $p = 2$  and  $f(t) = t$ .



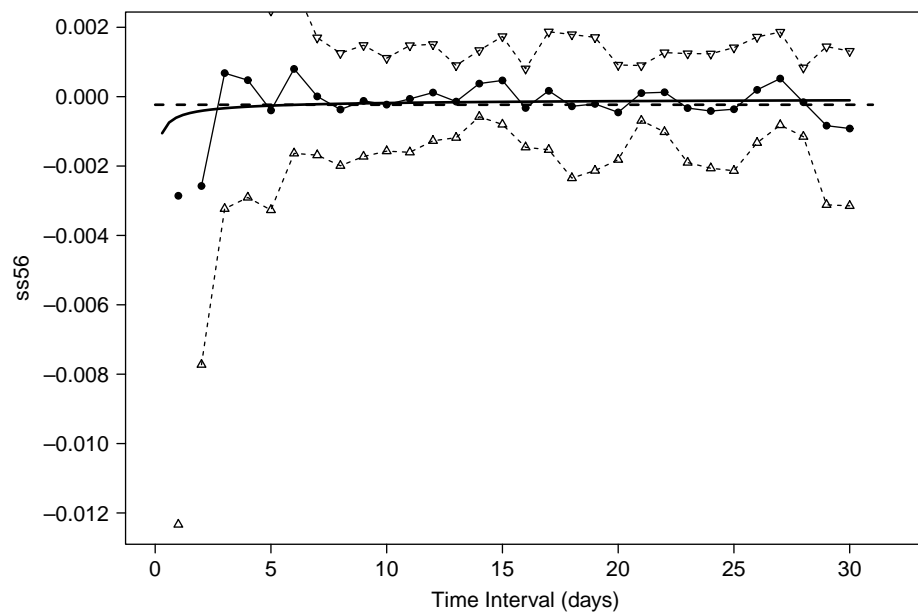

Figure S1.96. MLE of  $ss56$  by Time Interval Compared to Overall Mean ( $-2e-04$ ) for  $p = 2$  and  $f(t) = t$ .

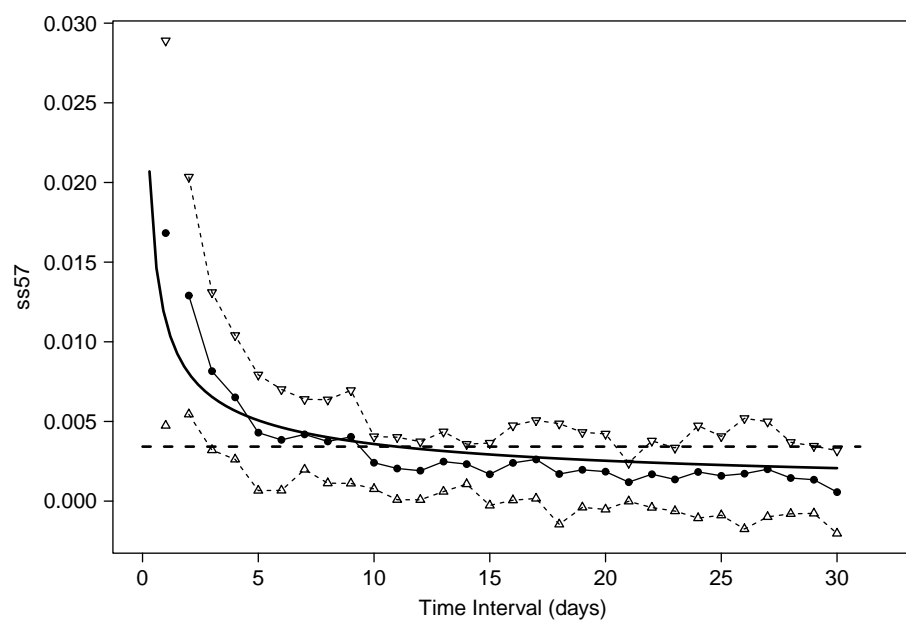

Figure S1.97. MLE of  $ss57$  by Time Interval Compared to Overall Mean (0.0034) for  $p = 2$  and  $f(t) = t$ .

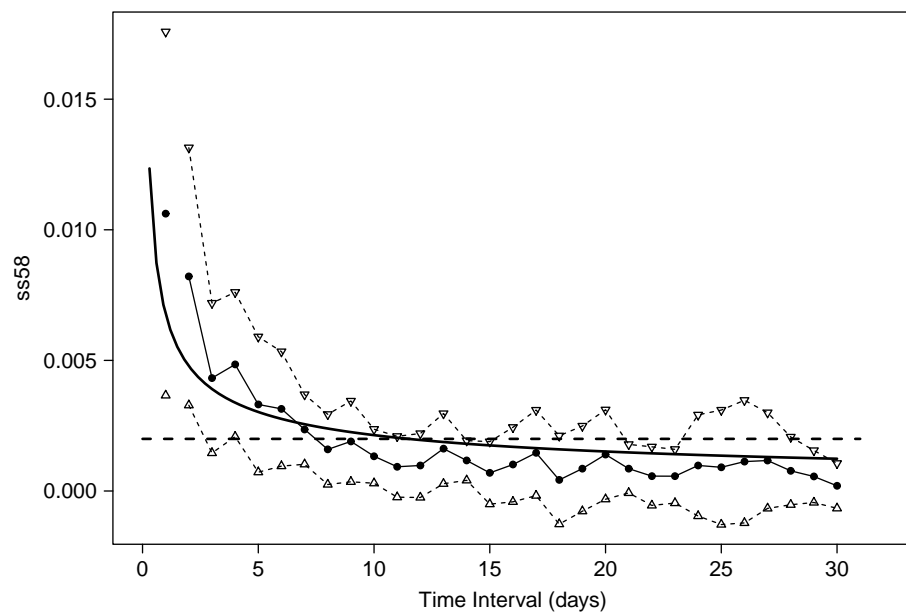

Figure S1.98. MLE of  $ss58$  by Time Interval Compared to Overall Mean (0.002) for  $p = 2$  and  $f(t) = t$ .

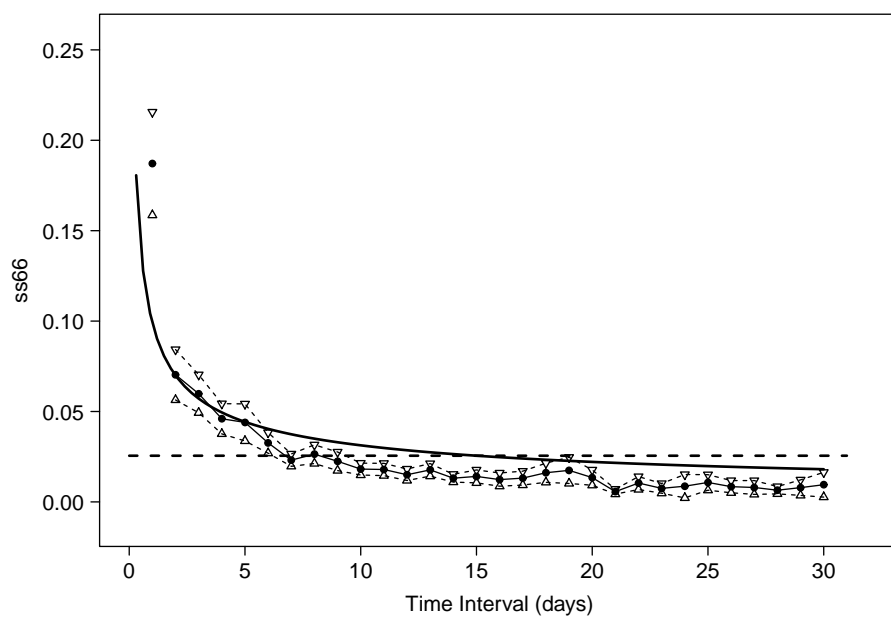

Figure S1.99. MLE of  $ss66$  by Time Interval Compared to Overall Mean (0.0255) for  $p = 2$  and  $f(t) = t$ .

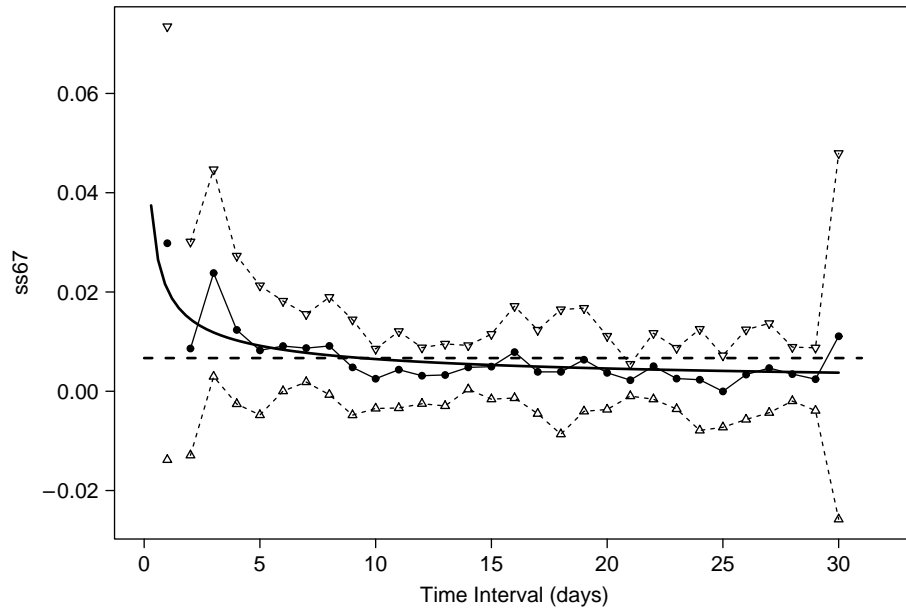

Figure S1.100. MLE of ss67 by Time Interval Compared to Overall Mean (0.0067) for  $p = 2$  and  $f(t) = t$ .

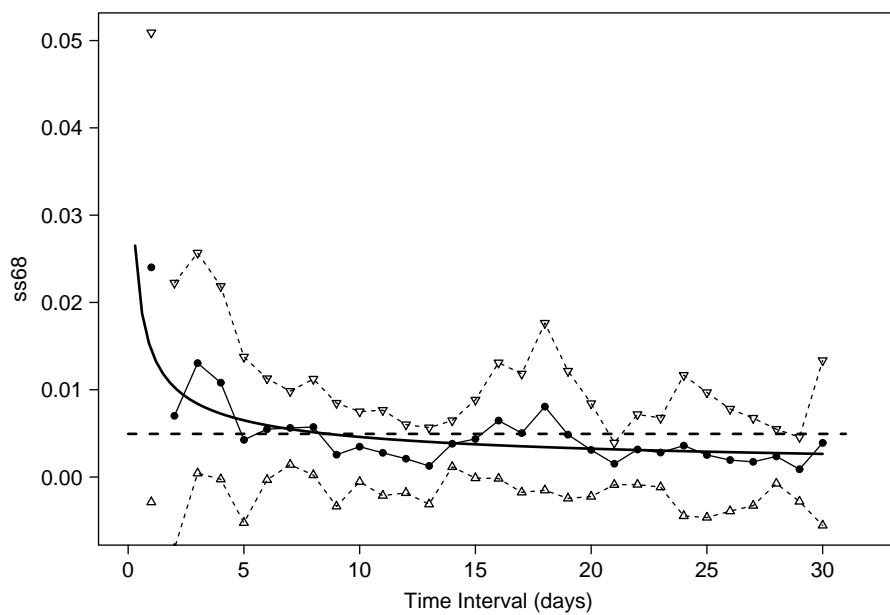

Figure S1.101. MLE of ss68 by Time Interval Compared to Overall Mean (0.0049) for  $p = 2$  and  $f(t) = t$ .

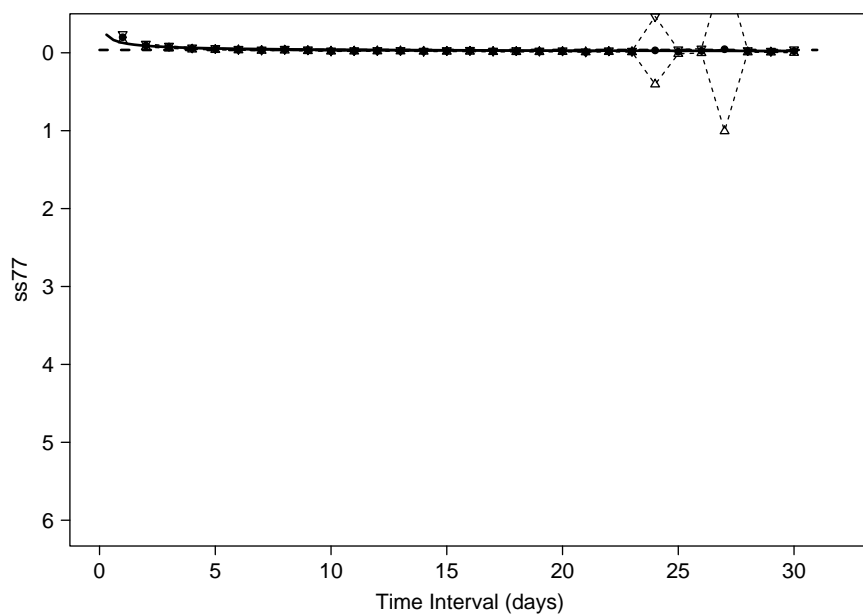

Figure S1.102. MLE of ss77 by Time Interval Compared to Overall Mean (0.0362) for  $p = 2$  and  $f(t) = t$ .

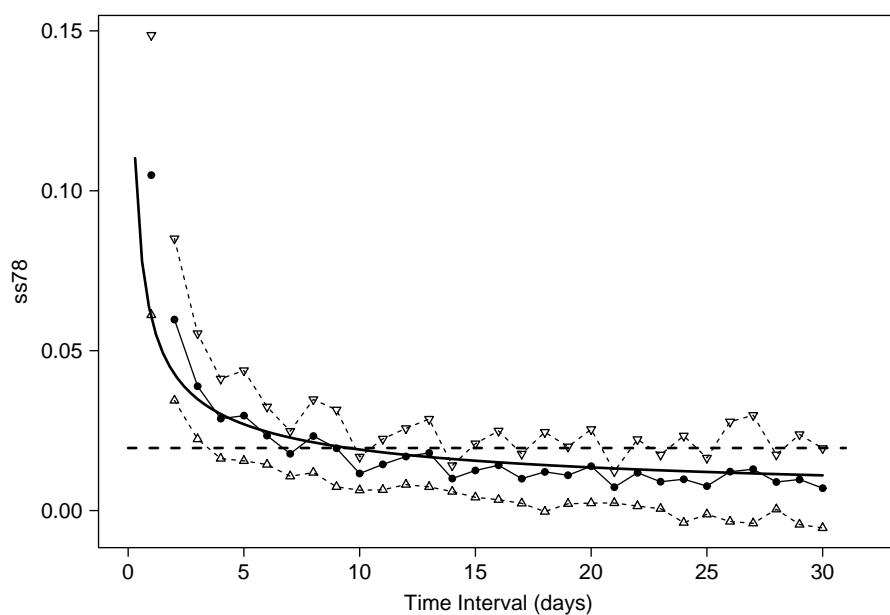

Figure S1.103. MLE of ss78 by Time Interval Compared to Overall Mean (0.0196) for  $p = 2$  and  $f(t) = t$ .

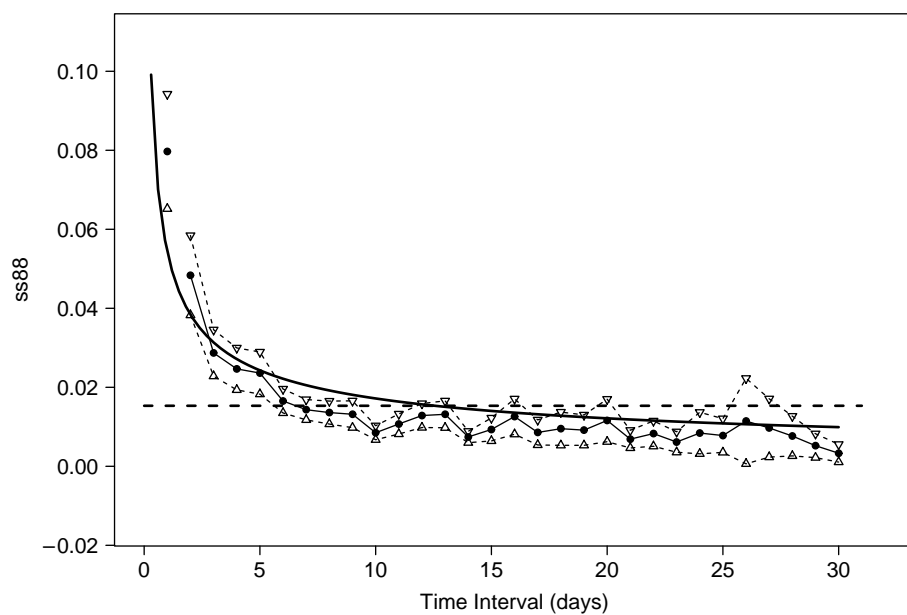

Figure S1.104. MLE of  $ss88$  by Time Interval Compared to Overall Mean (0.0153) for  $p = 2$  and  $f(t) = t$ .

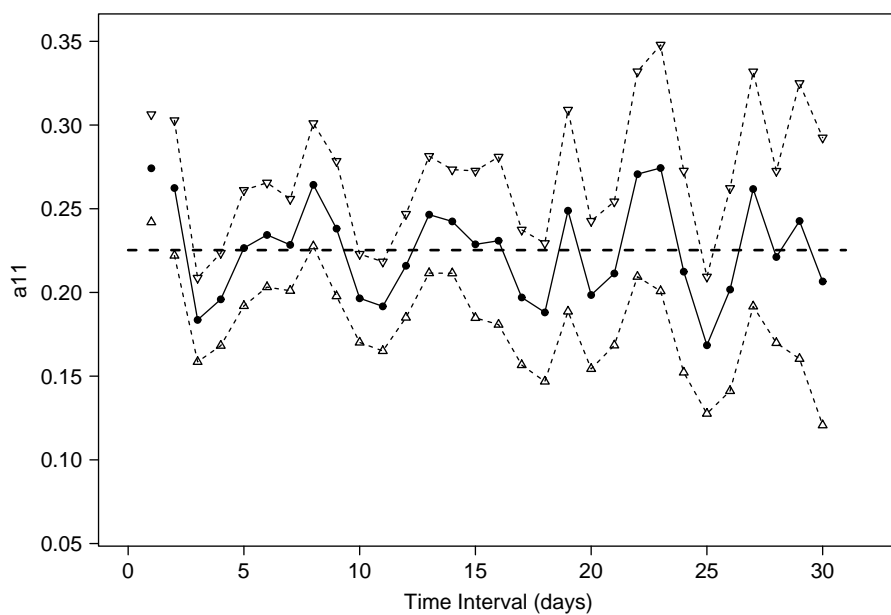

Figure S1.105. MLE of  $a11$  by Time Interval Compared to Overall Mean (0.2253) for  $p = 2$  and  $f(t) = t$ .

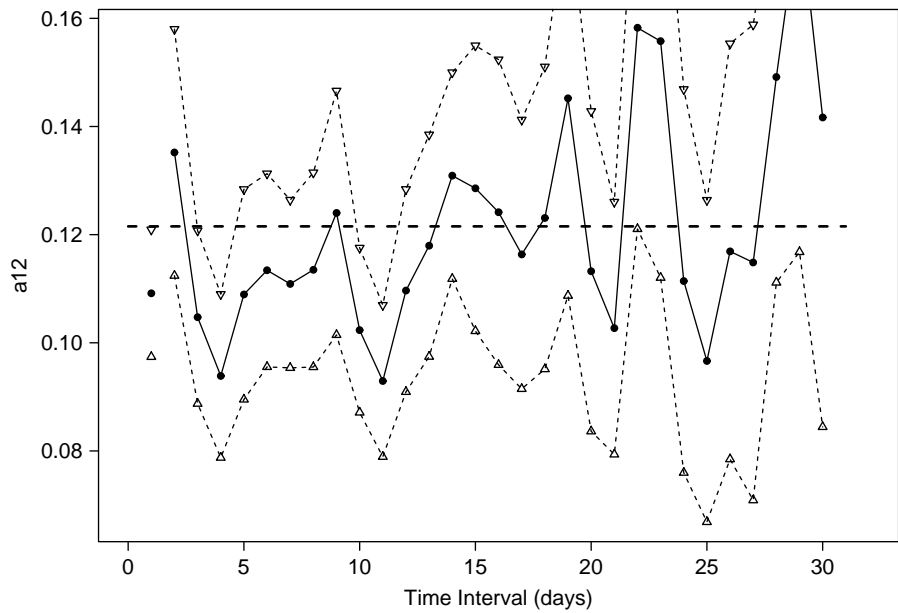

Figure S1.106. MLE of  $a_{12}$  by Time Interval Compared to Overall Mean (0.1215) for  $p = 2$  and  $f(t) = t$ .

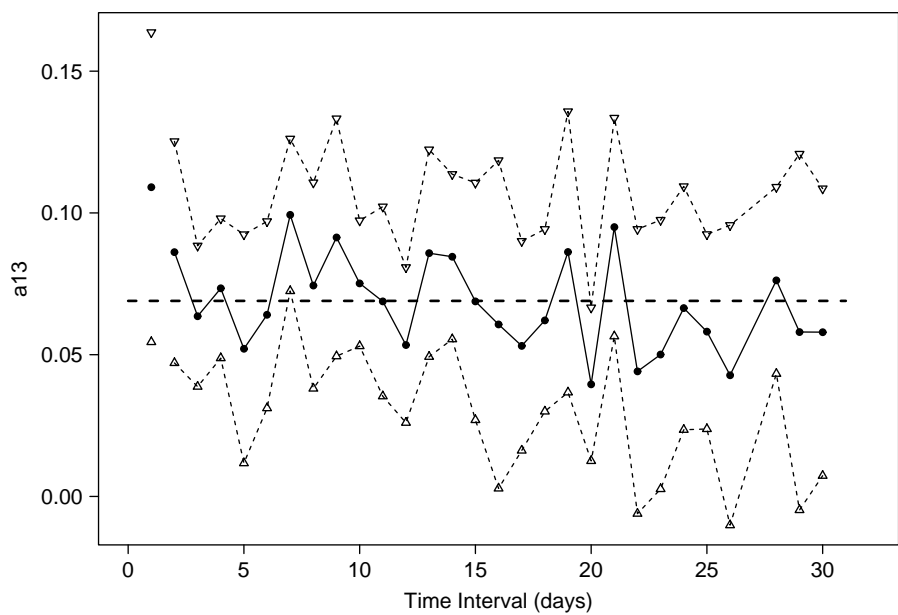

Figure S1.107. MLE of  $a_{13}$  by Time Interval Compared to Overall Mean (0.069) for  $p = 2$  and  $f(t) = t$ .

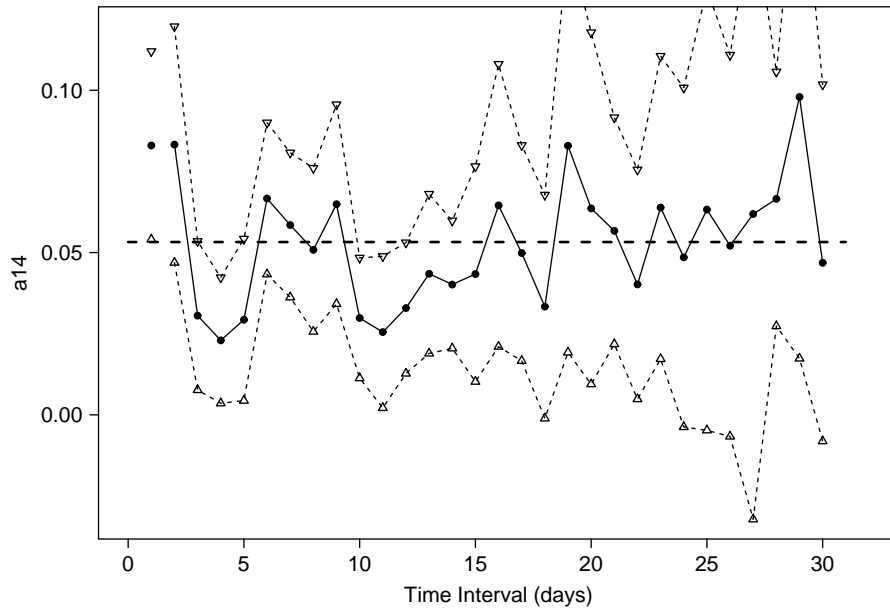

Figure S1.108. MLE of  $a_{14}$  by Time Interval Compared to Overall Mean (0.0532) for  $p = 2$  and  $f(t) = t$ .

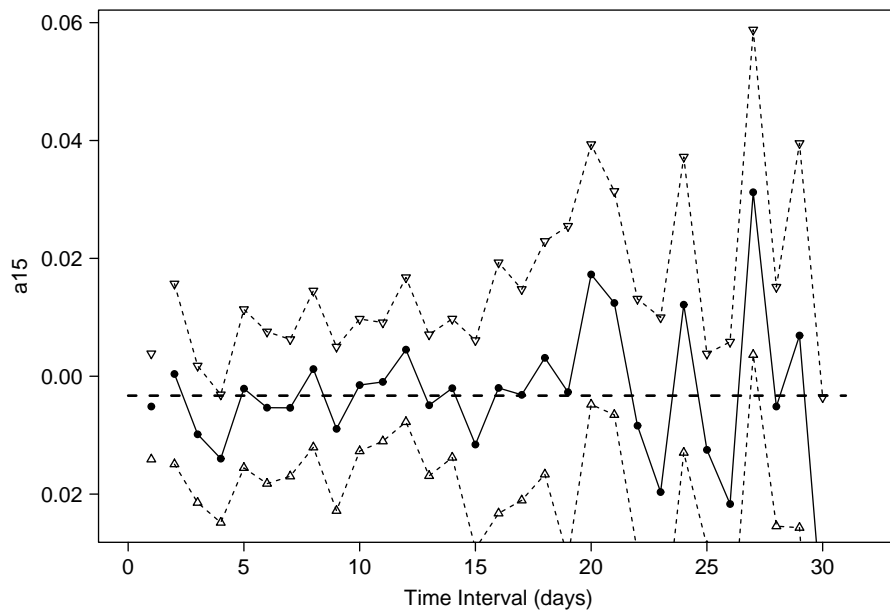

Figure S1.109. MLE of  $a_{15}$  by Time Interval Compared to Overall Mean (-0.0033) for  $p = 2$  and  $f(t) = t$ .

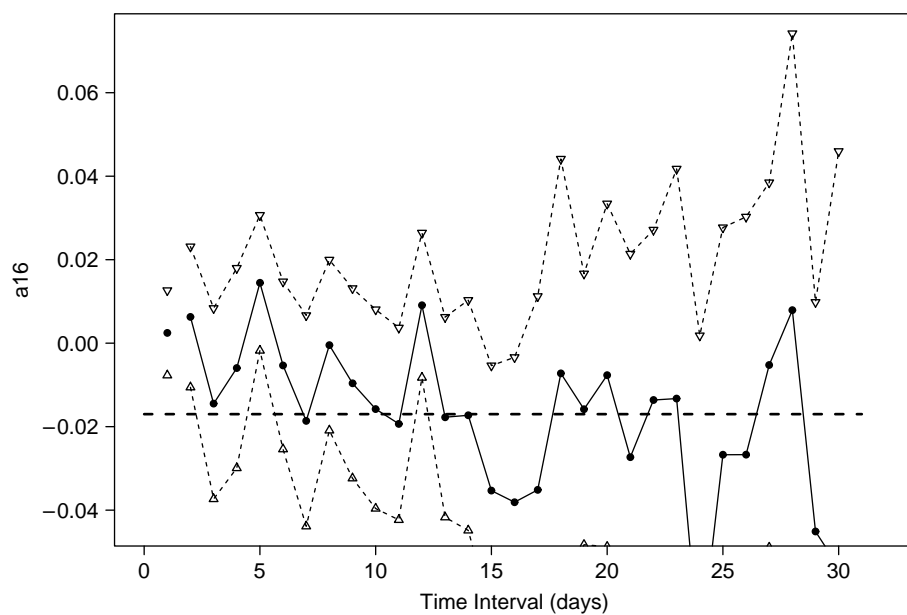

Figure S1.110. MLE of  $a_{16}$  by Time Interval Compared to Overall Mean ( $-0.017$ ) for  $p = 2$  and  $f(t) = t$ .

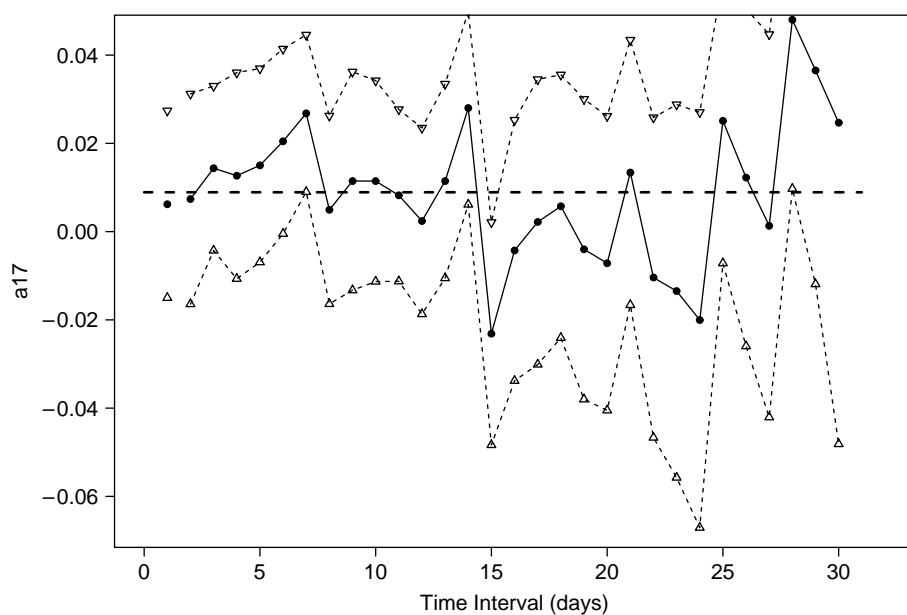

Figure S1.111. MLE of  $a_{17}$  by Time Interval Compared to Overall Mean ( $0.0089$ ) for  $p = 2$  and  $f(t) = t$ .



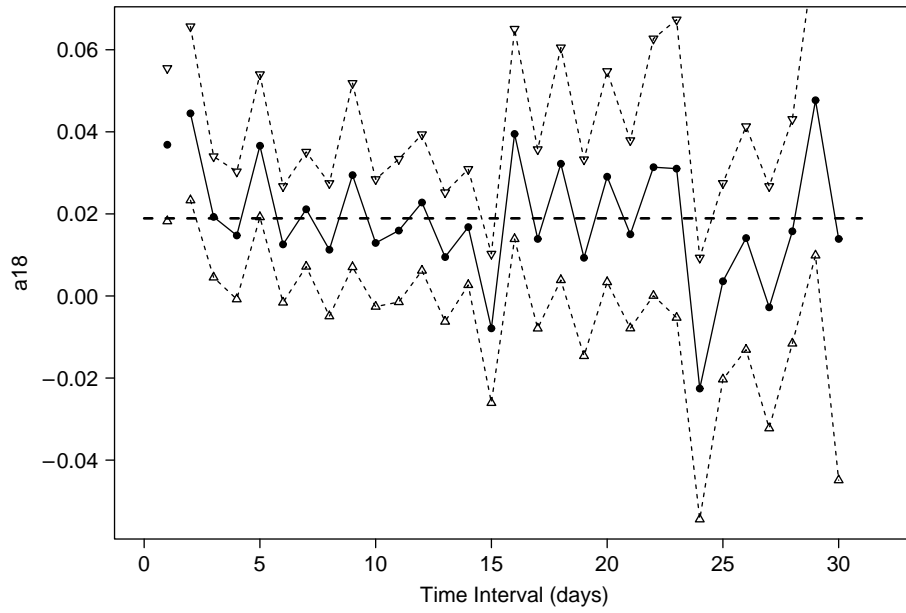

Figure S1.112. MLE of  $a_{18}$  by Time Interval Compared to Overall Mean (0.0189) for  $p = 2$  and  $f(t) = t$ .

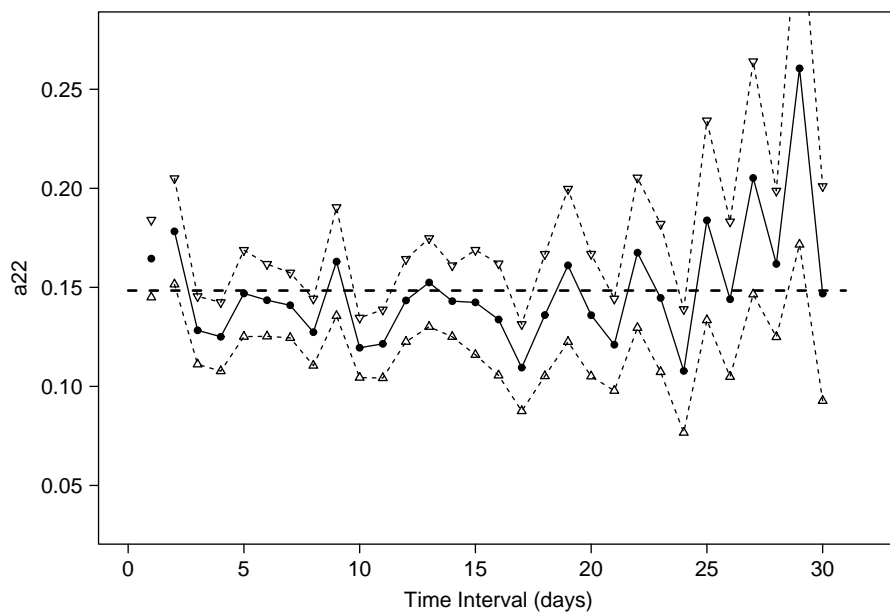

Figure S1.113. MLE of  $a_{22}$  by Time Interval Compared to Overall Mean (0.1484) for  $p = 2$  and  $f(t) = t$ .

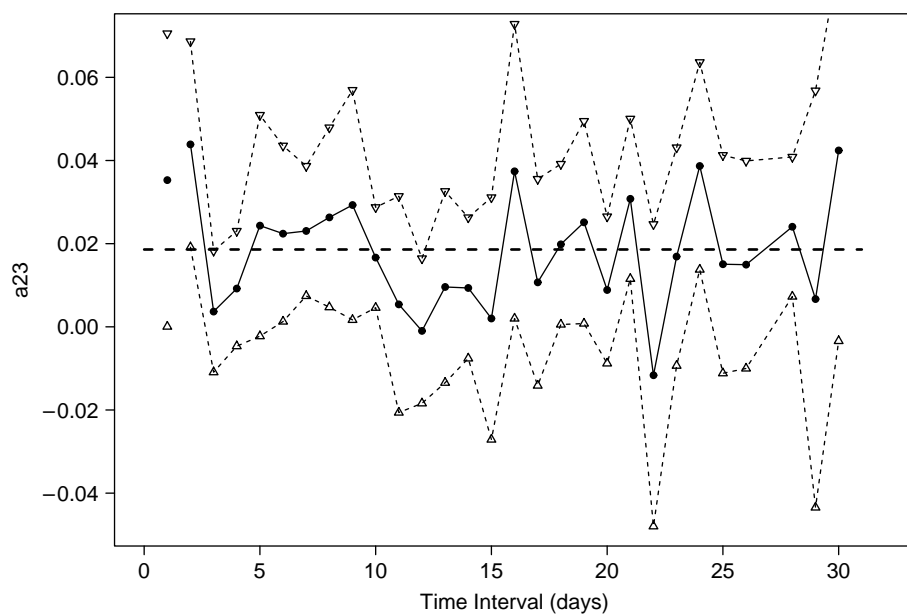

Figure S1.114. MLE of  $a_{23}$  by Time Interval Compared to Overall Mean (0.0186) for  $p = 2$  and  $f(t) = t$ .

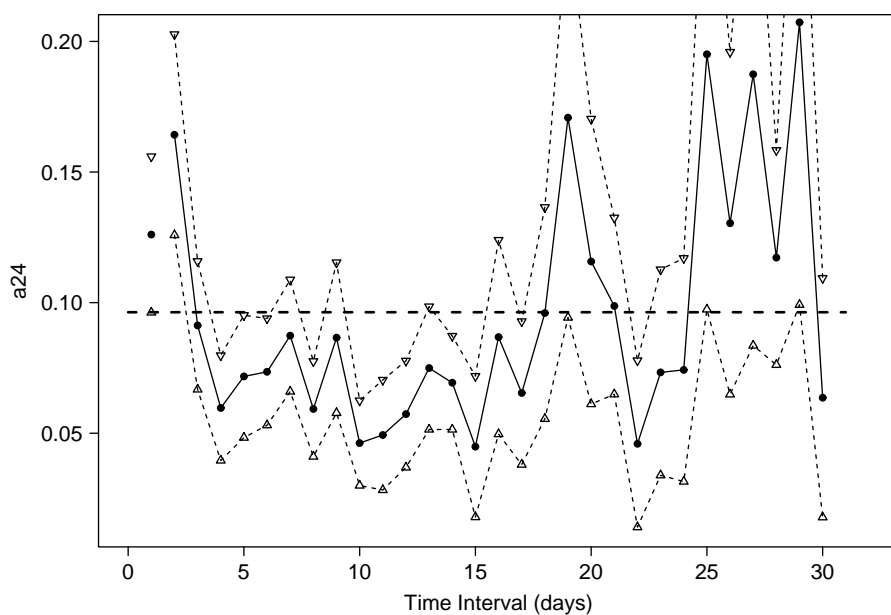

Figure S1.115. MLE of  $a_{24}$  by Time Interval Compared to Overall Mean (0.0963) for  $p = 2$  and  $f(t) = t$ .

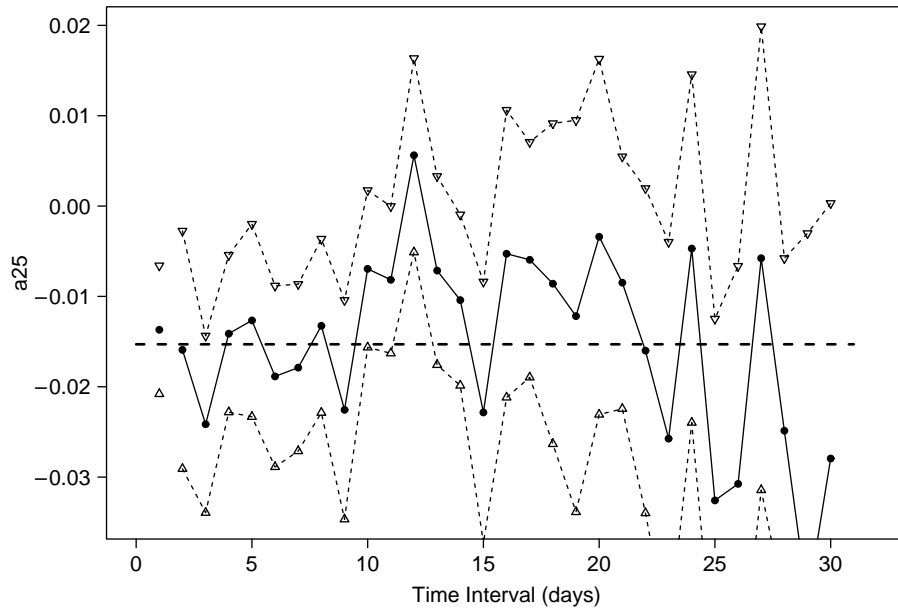

Figure S1.116. MLE of  $a_{25}$  by Time Interval Compared to Overall Mean ( $-0.0153$ ) for  $p = 2$  and  $f(t) = t$ .

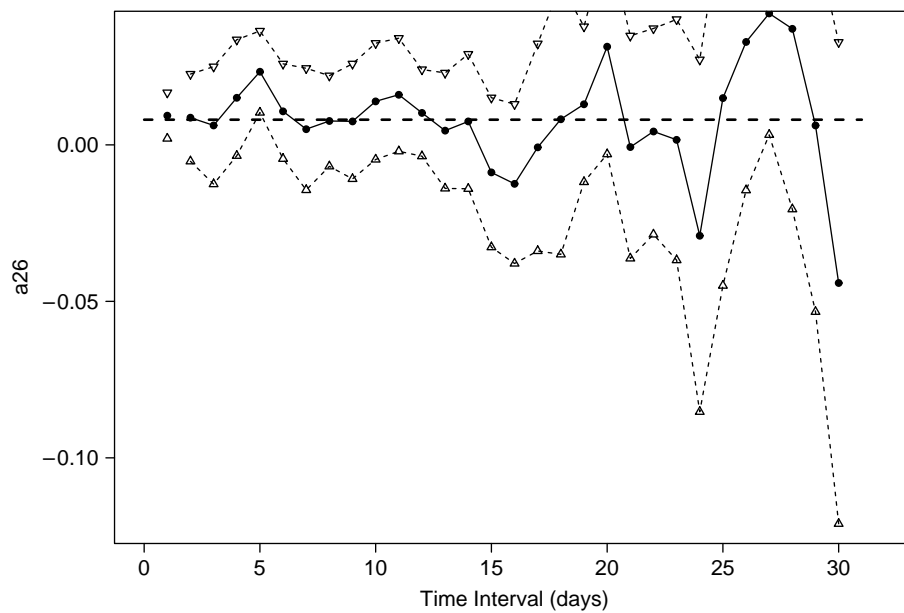

Figure S1.117. MLE of  $a_{26}$  by Time Interval Compared to Overall Mean ( $0.008$ ) for  $p = 2$  and  $f(t) = t$ .

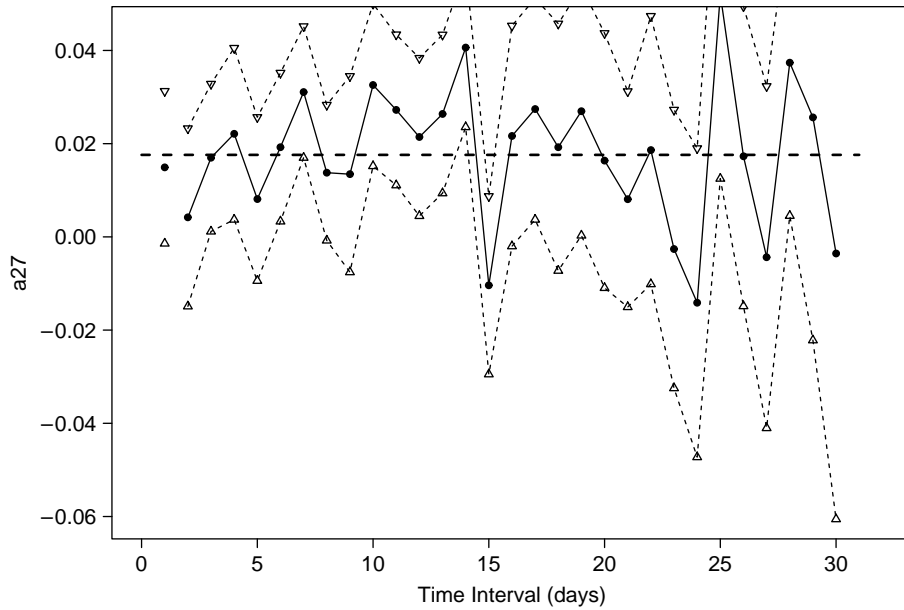

Figure S1.118. MLE of  $a_{27}$  by Time Interval Compared to Overall Mean (0.0176) for  $p = 2$  and  $f(t) = t$ .

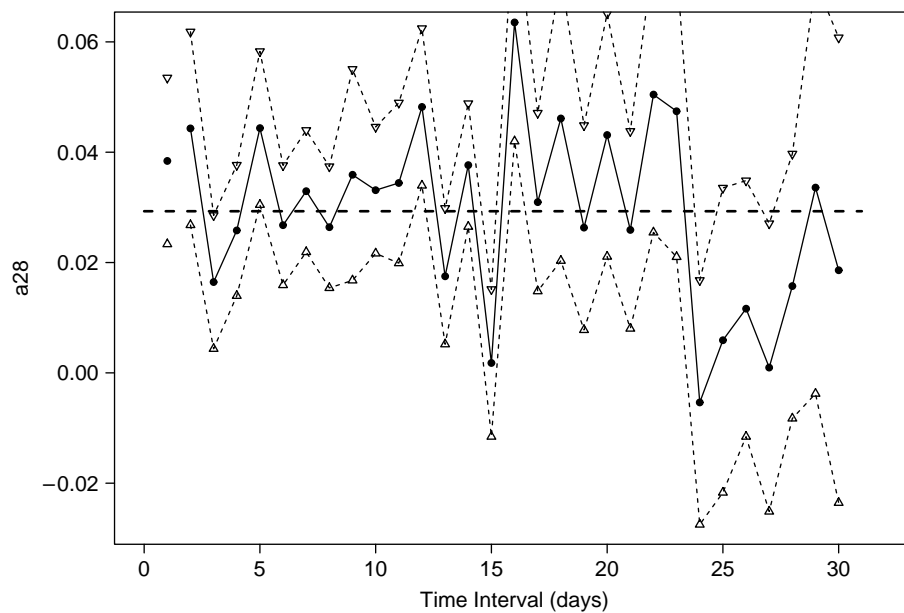

Figure S1.119. MLE of  $a_{28}$  by Time Interval Compared to Overall Mean (0.0293) for  $p = 2$  and  $f(t) = t$ .

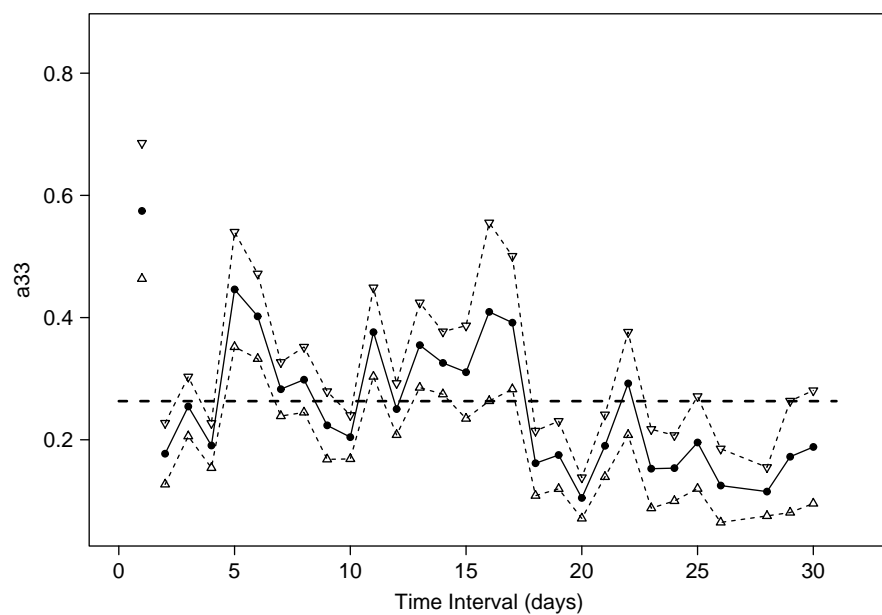

Figure S1.120. MLE of  $a_{33}$  by Time Interval Compared to Overall Mean (0.2633) for  $p = 2$  and  $f(t) = t$ .

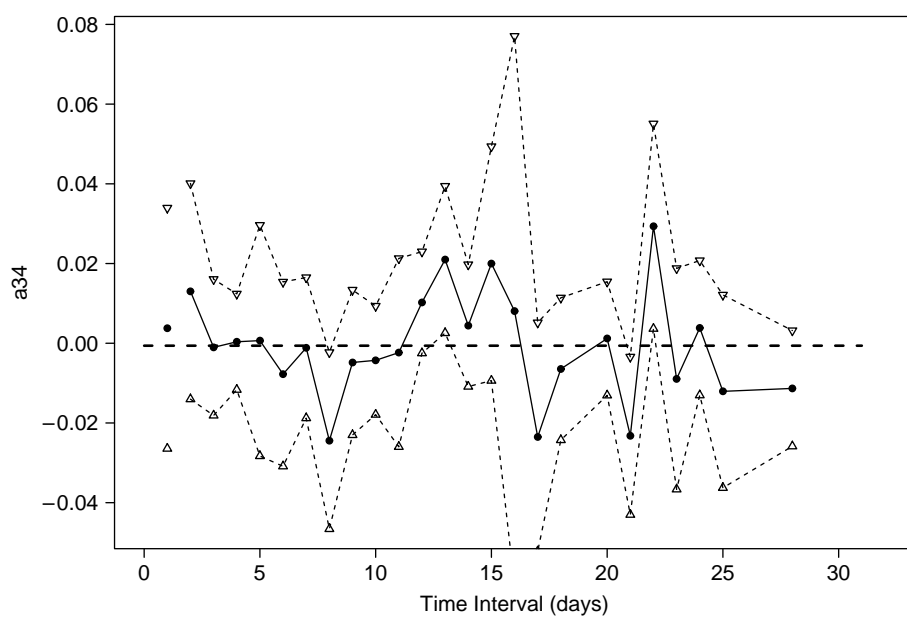

Figure S1.121. MLE of  $a_{34}$  by Time Interval Compared to Overall Mean ( $-6e-04$ ) for  $p = 2$  and  $f(t) = t$ .

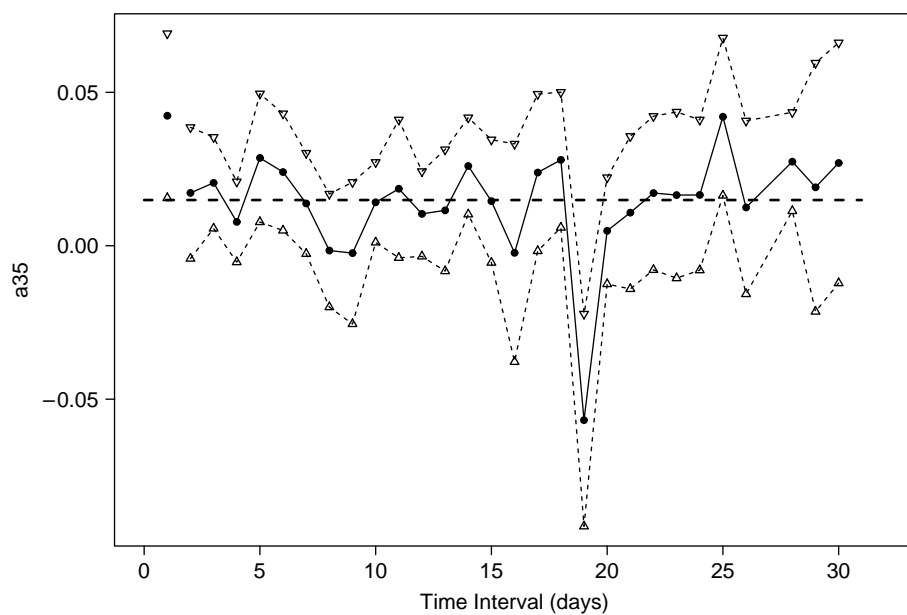

Figure S1.122. MLE of  $a_{35}$  by Time Interval Compared to Overall Mean (0.0149) for  $p = 2$  and  $f(t) = t$ .

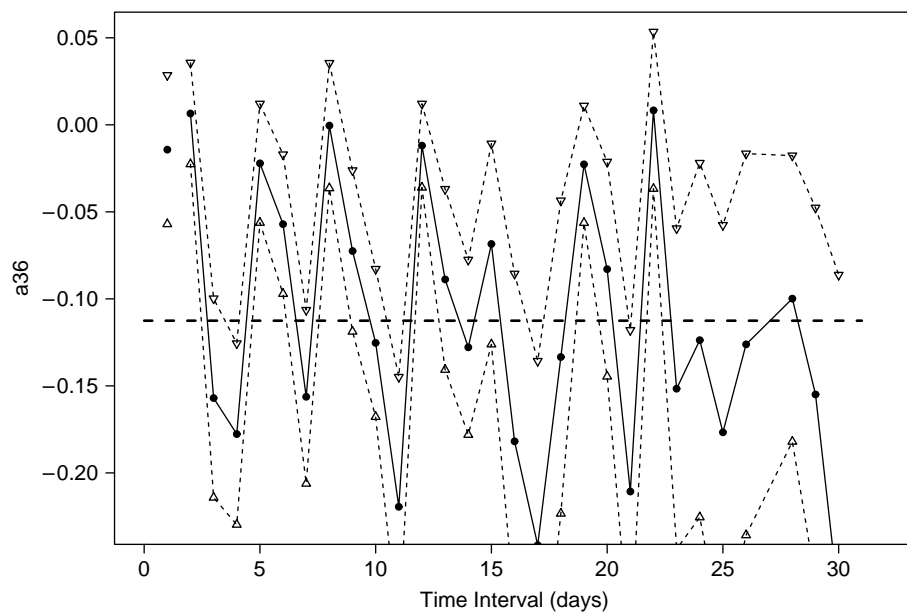

Figure S1.123. MLE of  $a_{36}$  by Time Interval Compared to Overall Mean (-0.1125) for  $p = 2$  and  $f(t) = t$ .

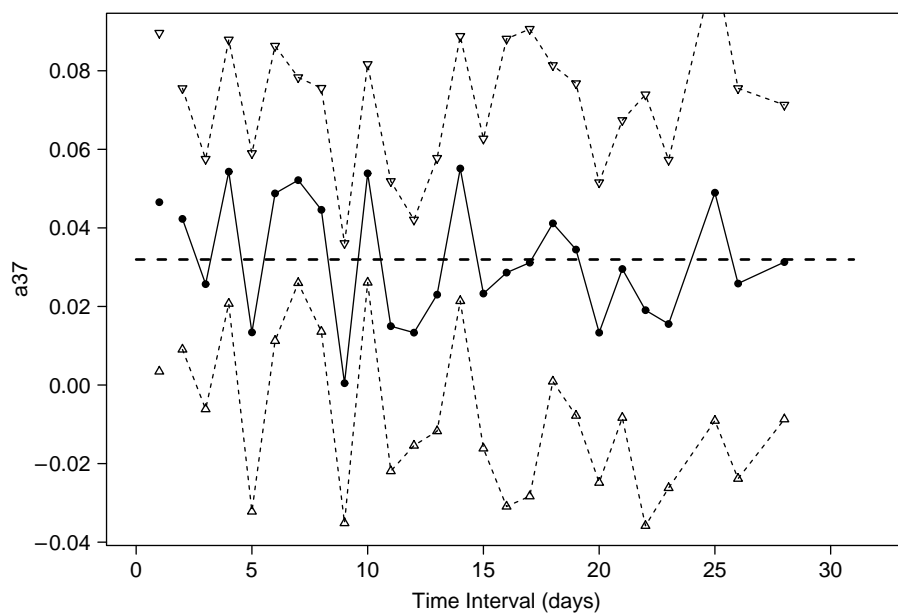

Figure S1.124. MLE of  $a_{37}$  by Time Interval Compared to Overall Mean (0.032) for  $p = 2$  and  $f(t) = t$ .

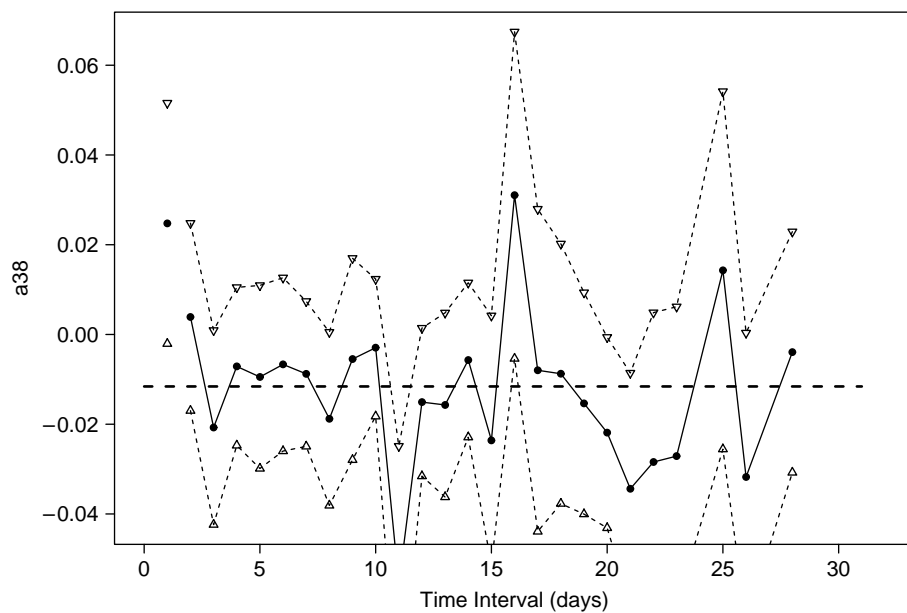

Figure S1.125. MLE of  $a_{38}$  by Time Interval Compared to Overall Mean (-0.0116) for  $p = 2$  and  $f(t) = t$ .

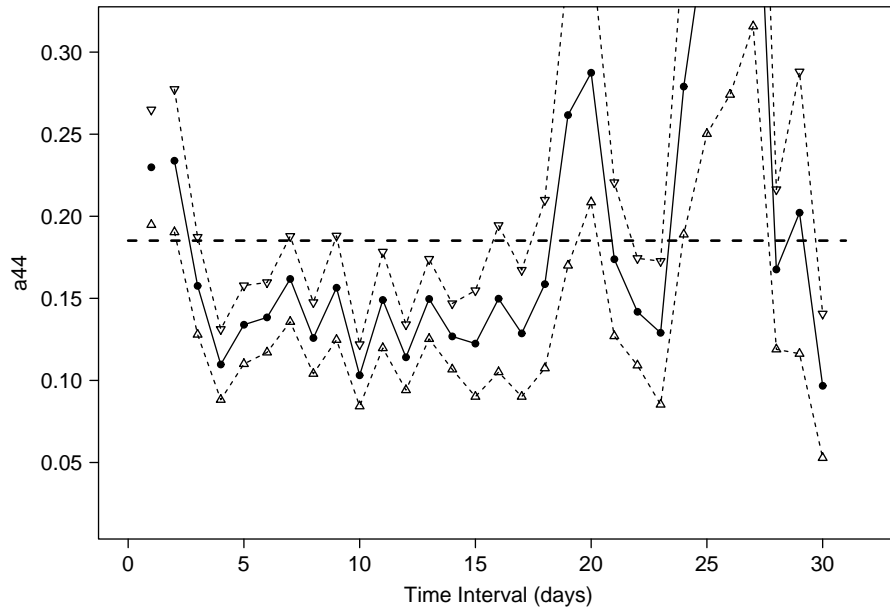

Figure S1.126. MLE of  $a_{44}$  by Time Interval Compared to Overall Mean (0.1852) for  $p = 2$  and  $f(t) = t$ .

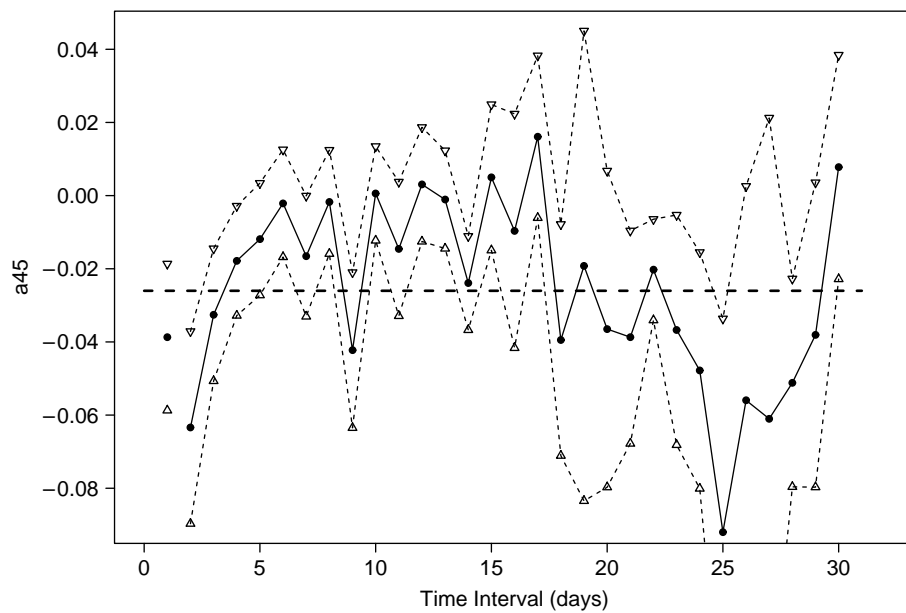

Figure S1.127. MLE of  $a_{45}$  by Time Interval Compared to Overall Mean (-0.026) for  $p = 2$  and  $f(t) = t$ .



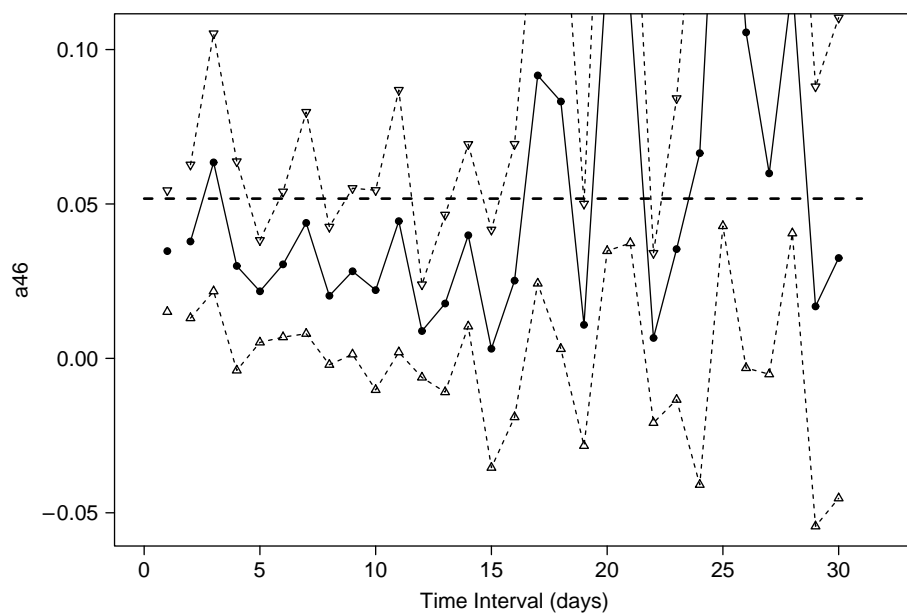

Figure S1.128. MLE of  $a_{46}$  by Time Interval Compared to Overall Mean (0.0517) for  $p = 2$  and  $f(t) = t$ .

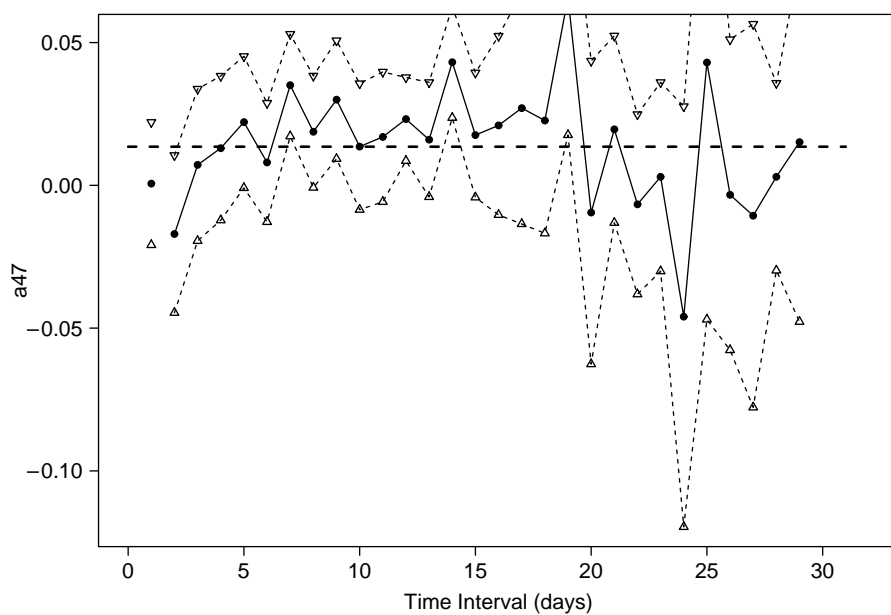

Figure S1.129. MLE of  $a_{47}$  by Time Interval Compared to Overall Mean (0.0135) for  $p = 2$  and  $f(t) = t$ .

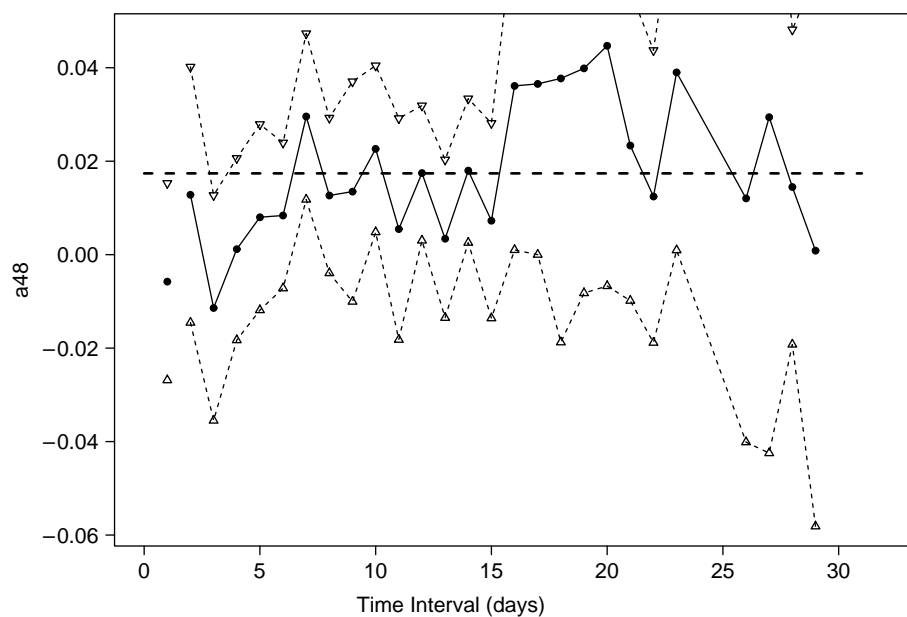

Figure S1.130. MLE of  $a_{48}$  by Time Interval Compared to Overall Mean (0.0174) for  $p = 2$  and  $f(t) = t$ .

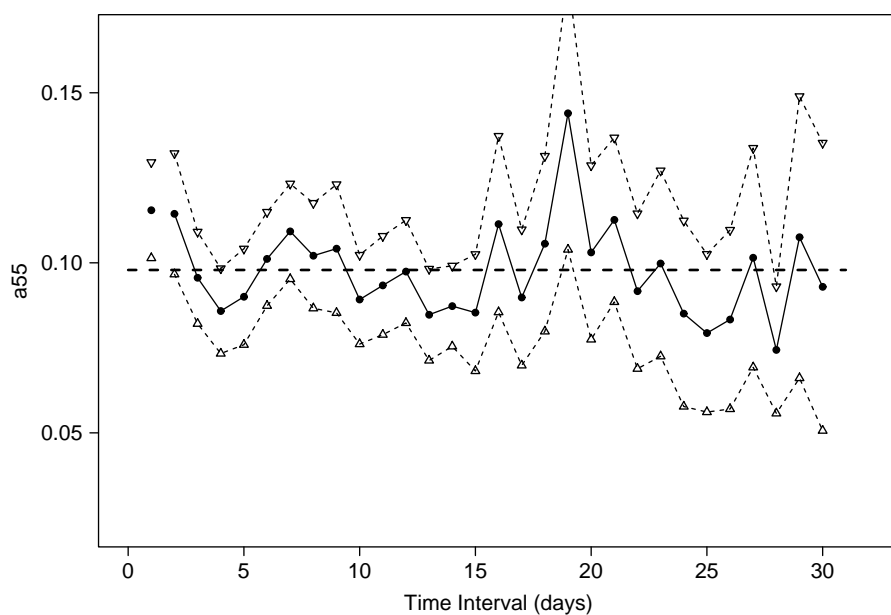

Figure S1.131. MLE of  $a_{55}$  by Time Interval Compared to Overall Mean (0.0979) for  $p = 2$  and  $f(t) = t$ .

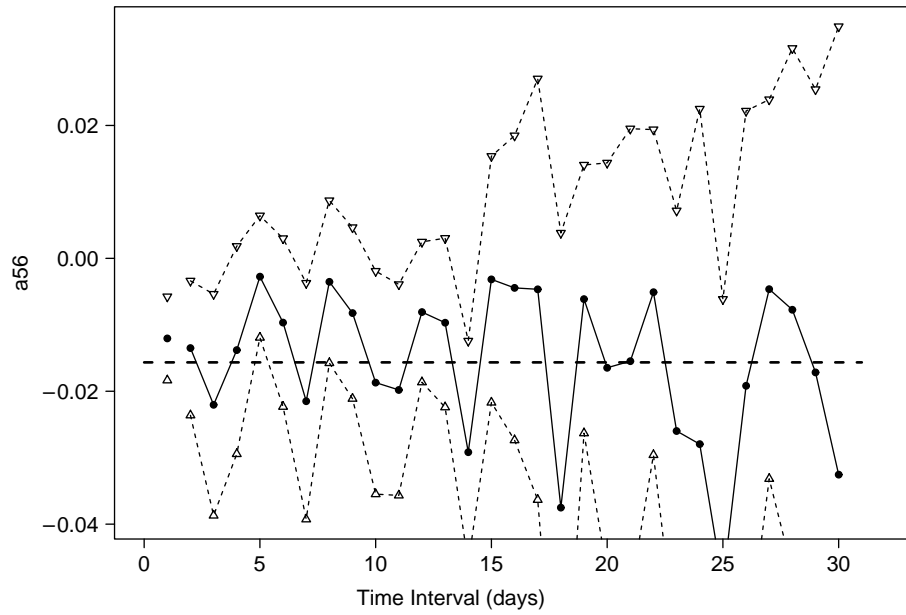

Figure S1.132. MLE of a56 by Time Interval Compared to Overall Mean ( $-0.0157$ ) for  $p = 2$  and  $f(t) = t$ .

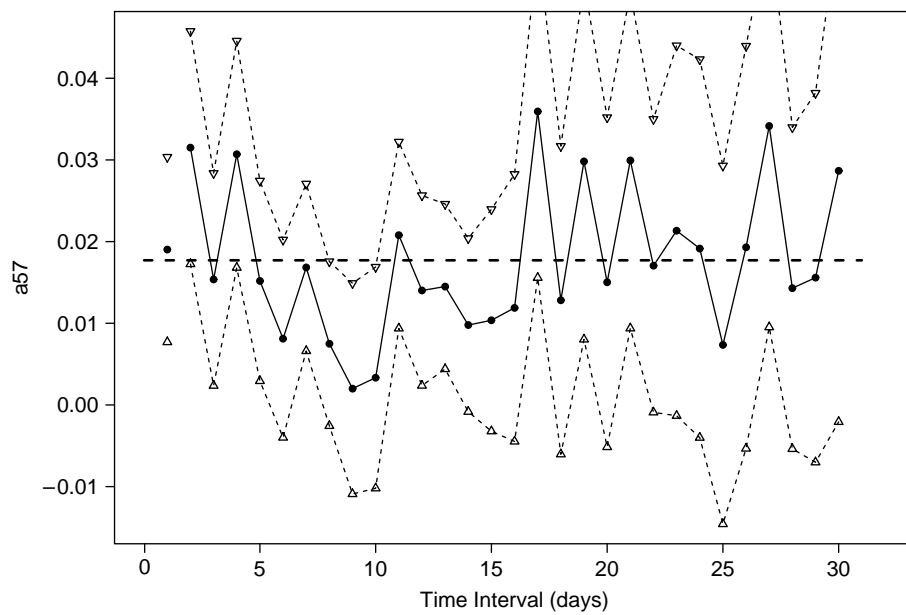

Figure S1.133. MLE of a57 by Time Interval Compared to Overall Mean ( $0.0177$ ) for  $p = 2$  and  $f(t) = t$ .

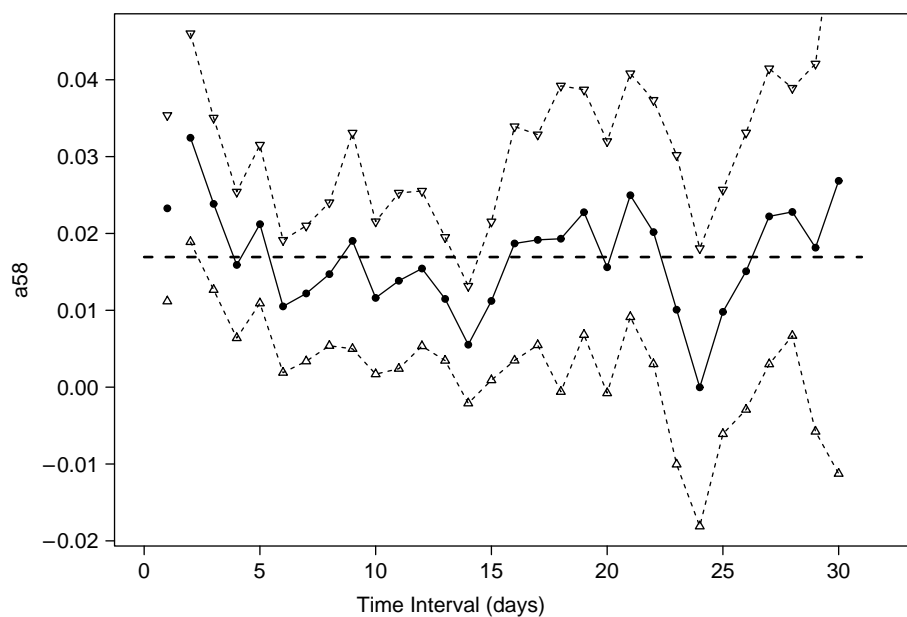

Figure S1.134. MLE of  $a_{58}$  by Time Interval Compared to Overall Mean (0.0169) for  $p = 2$  and  $f(t) = t$ .

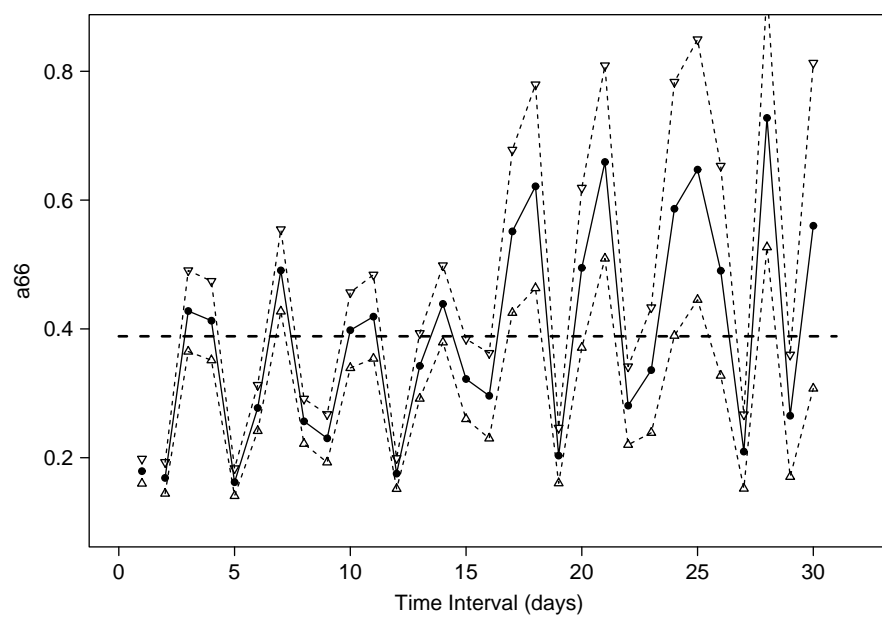

Figure S1.135. MLE of  $a_{66}$  by Time Interval Compared to Overall Mean (0.3886) for  $p = 2$  and  $f(t) = t$ .

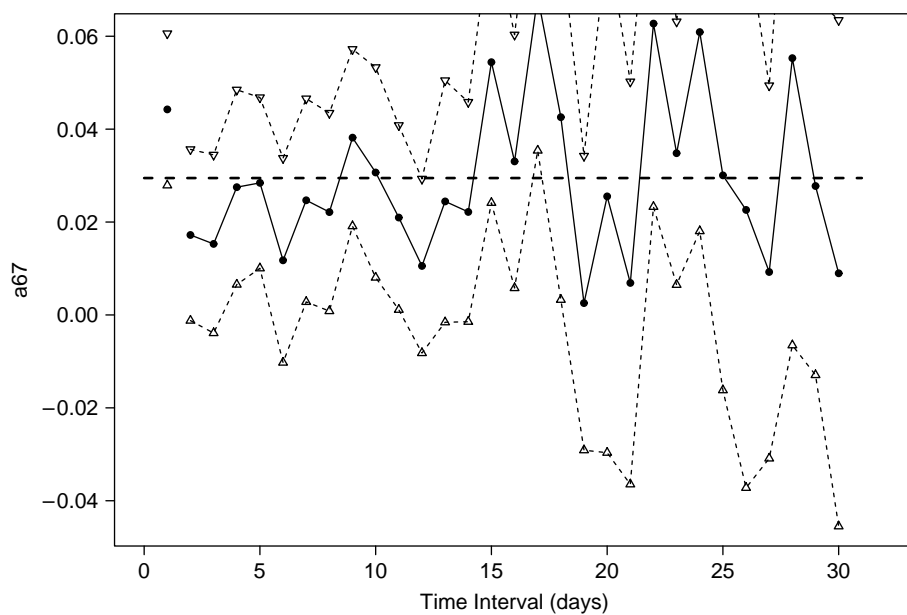

Figure S1.136. MLE of  $a_{67}$  by Time Interval Compared to Overall Mean (0.0295) for  $p = 2$  and  $f(t) = t$ .

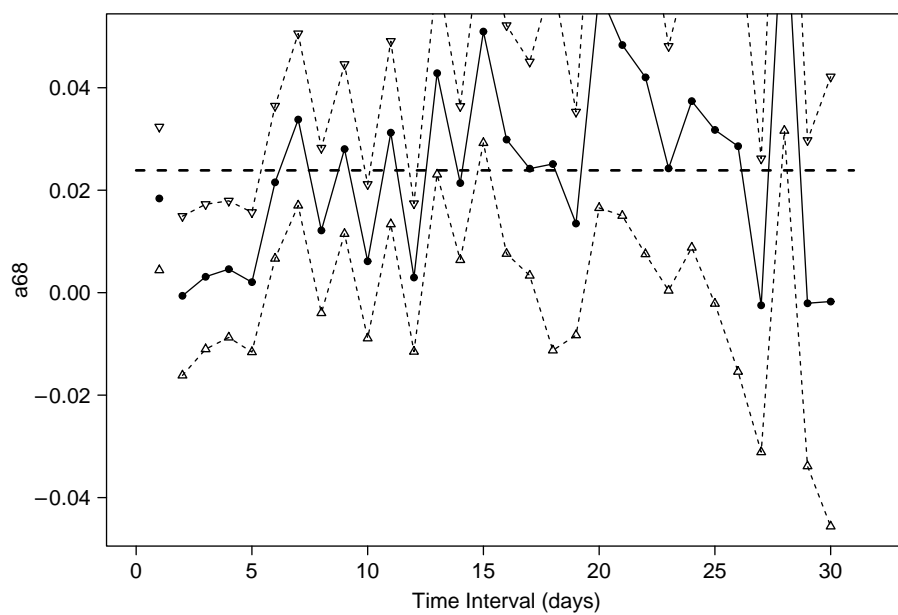

Figure S1.137. MLE of  $a_{68}$  by Time Interval Compared to Overall Mean (0.0239) for  $p = 2$  and  $f(t) = t$ .

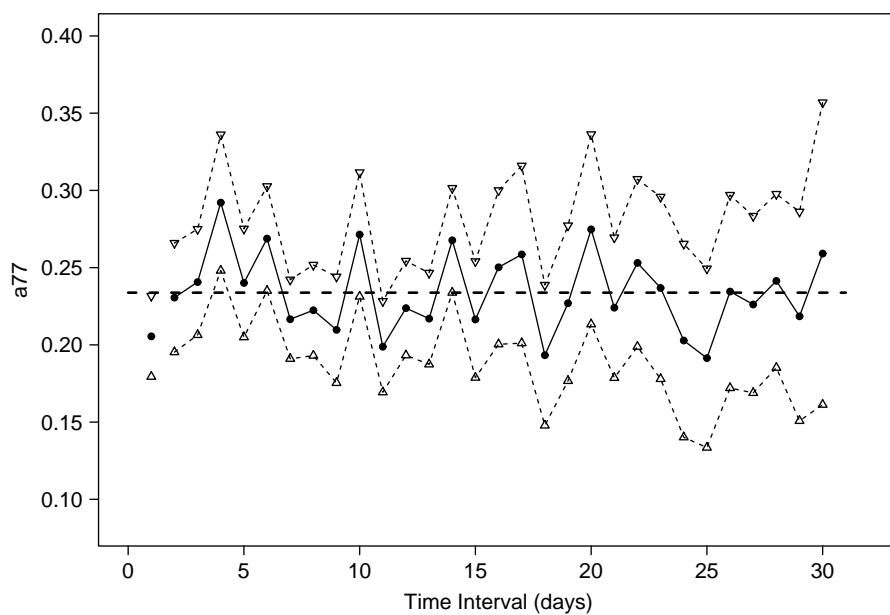

Figure S1.138. MLE of  $a_{77}$  by Time Interval Compared to Overall Mean (0.2338) for  $p = 2$  and  $f(t) = t$ .

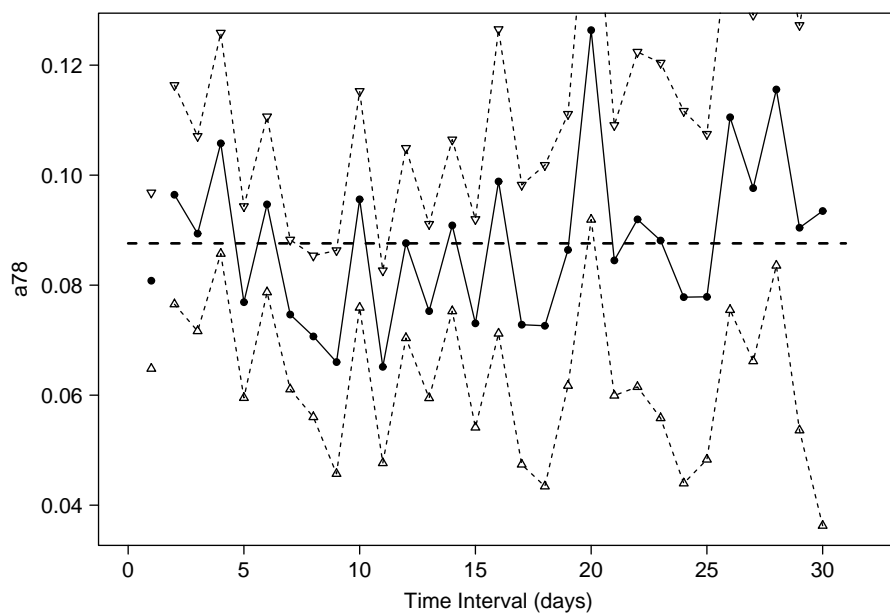

Figure S1.139. MLE of  $a_{78}$  by Time Interval Compared to Overall Mean (0.0876) for  $p = 2$  and  $f(t) = t$ .

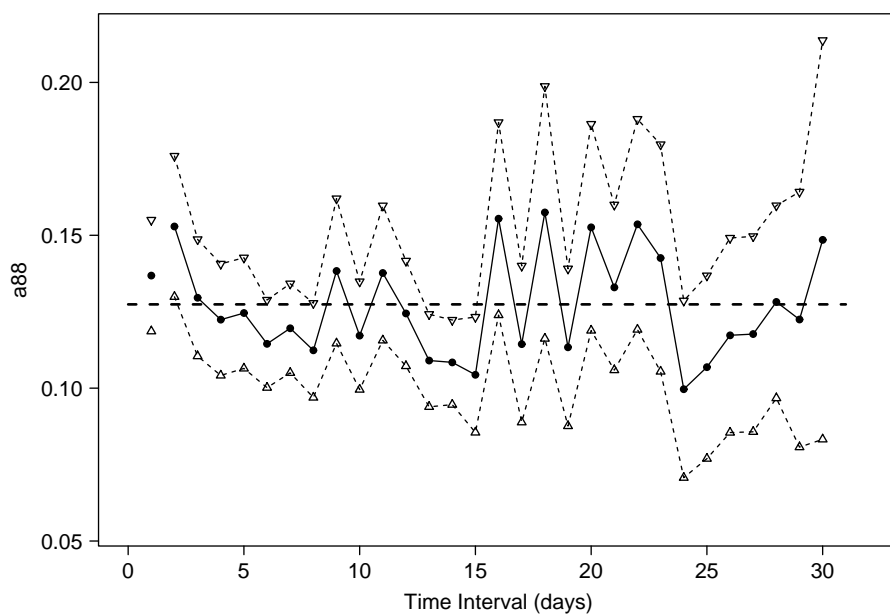

Figure S1.140. MLE of  $a_{88}$  by Time Interval Compared to Overall Mean (0.1274) for  $p = 2$  and  $f(t) = t$ .

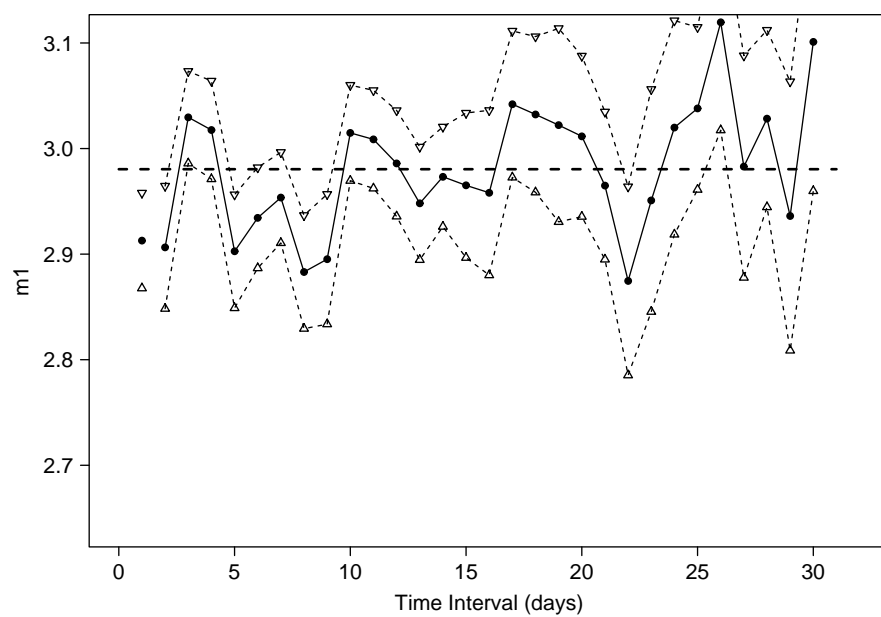

Figure S1.141. MLE of  $m_1$  by Time Interval Compared to Overall Mean (2.9804) for  $p = 2$  and  $f(t) = t$ .

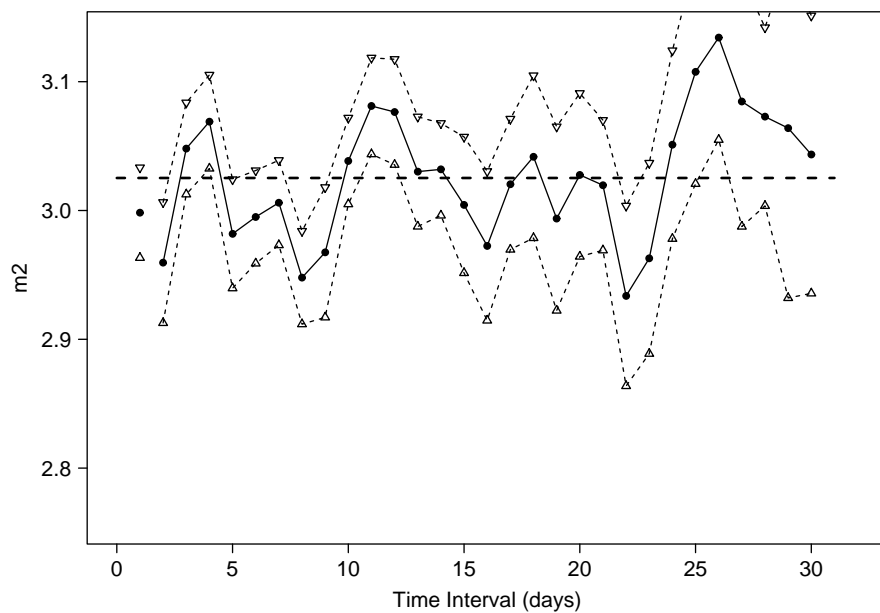

Figure S1.142. MLE of  $m_2$  by Time Interval Compared to Overall Mean (3.0252) for  $p = 2$  and  $f(t) = t$ .

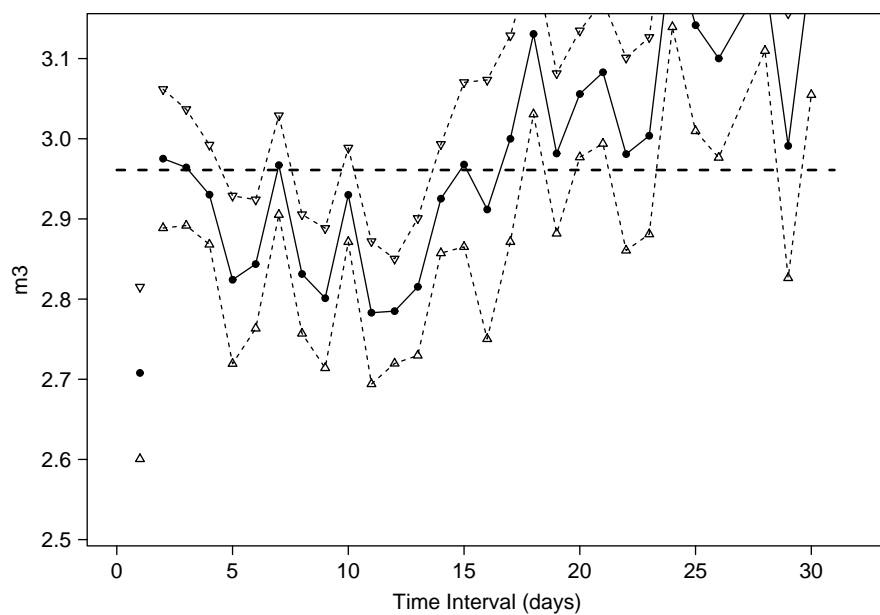

Figure S1.143. MLE of  $m_3$  by Time Interval Compared to Overall Mean (2.961) for  $p = 2$  and  $f(t) = t$ .



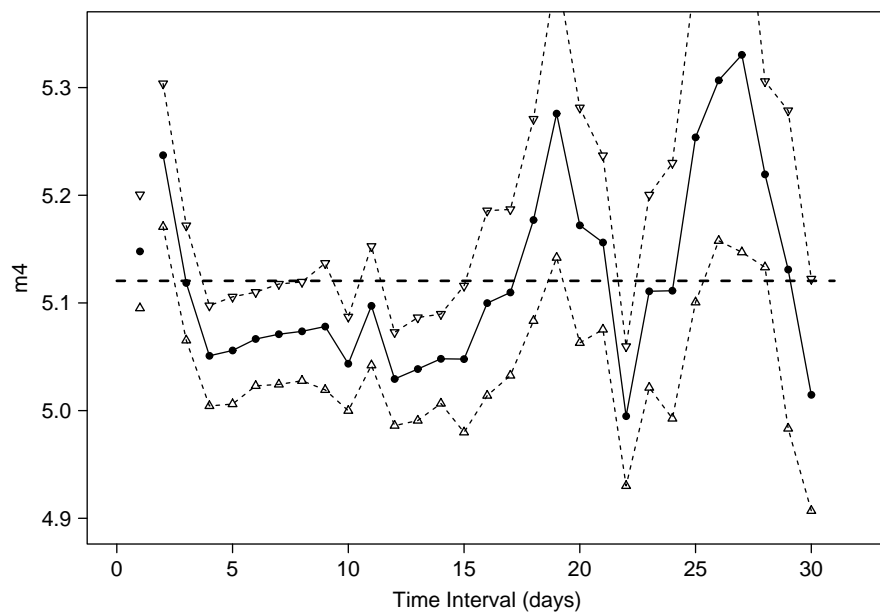

Figure S1.144. MLE of  $m_4$  by Time Interval Compared to Overall Mean (5.1205) for  $p = 2$  and  $f(t) = t$ .

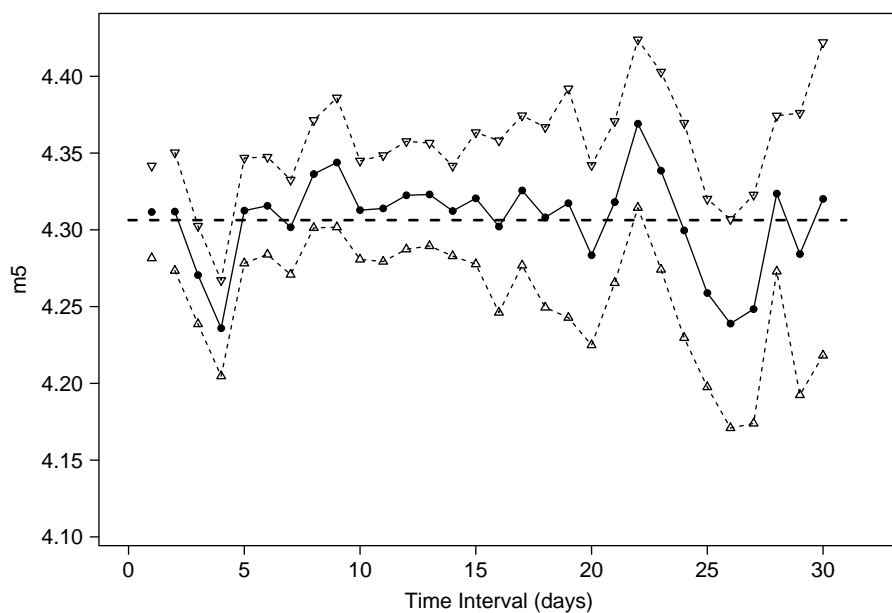

Figure S1.145. MLE of  $m_5$  by Time Interval Compared to Overall Mean (4.3063) for  $p = 2$  and  $f(t) = t$ .

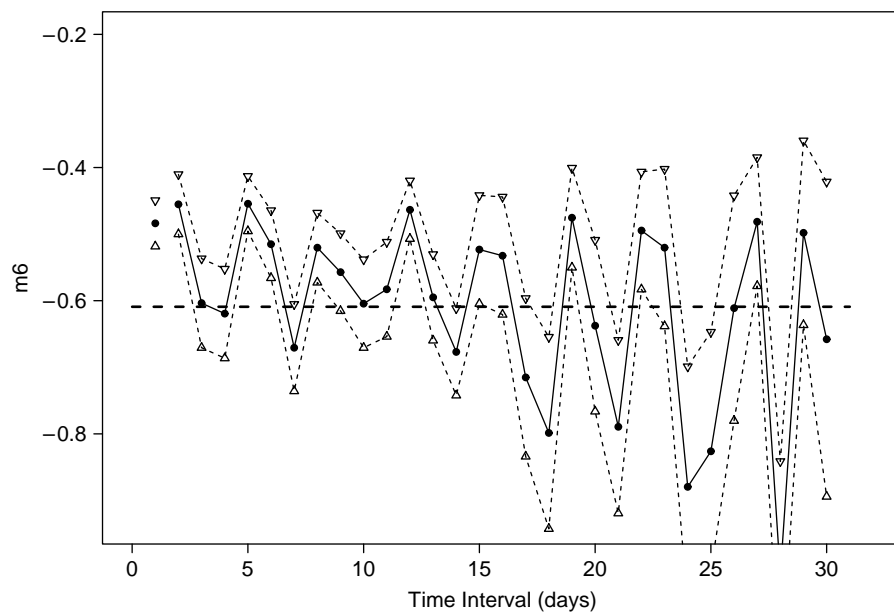

Figure S1.146. MLE of  $m_6$  by Time Interval Compared to Overall Mean ( $-0.6091$ ) for  $p = 2$  and  $f(t) = t$ .

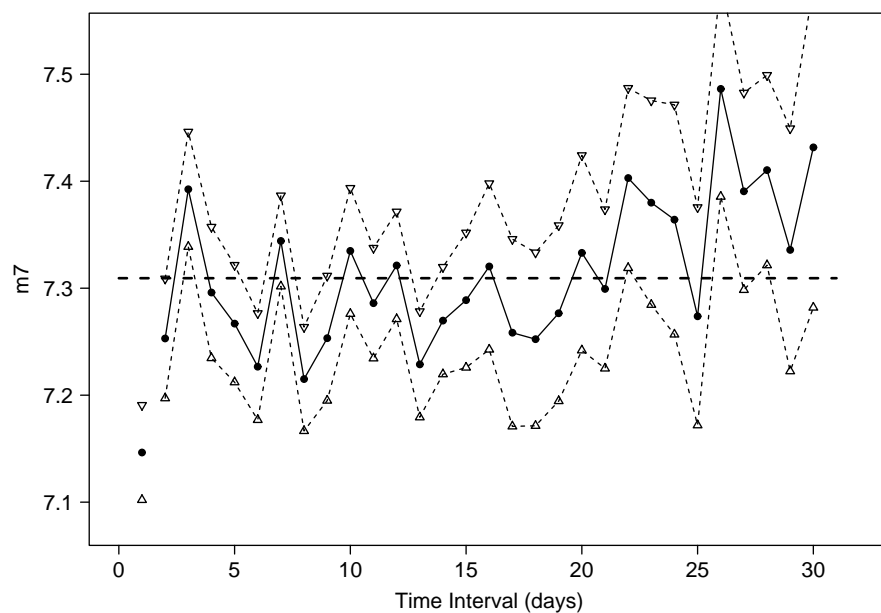

Figure S1.147. MLE of  $m_7$  by Time Interval Compared to Overall Mean ( $7.3094$ ) for  $p = 2$  and  $f(t) = t$ .

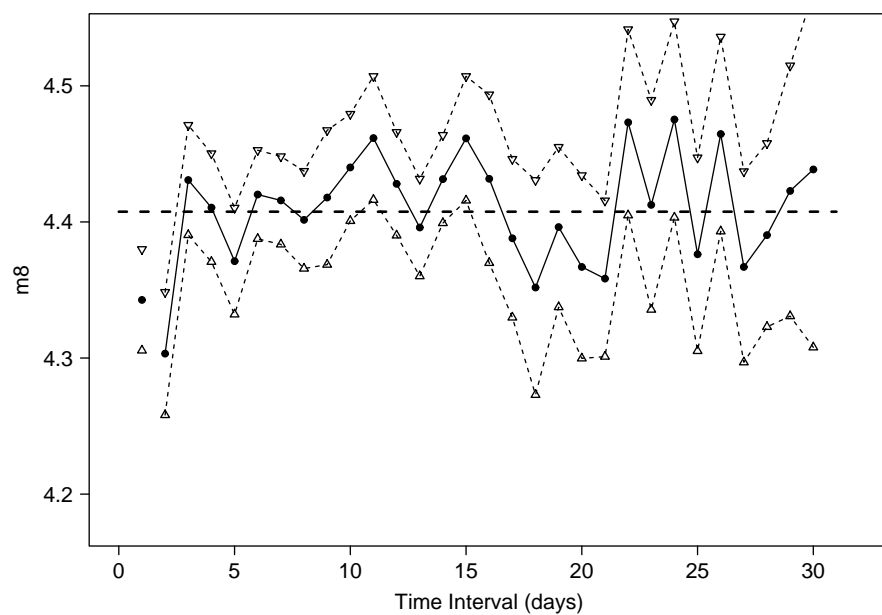

Figure S1.148. MLE of  $m_8$  by Time Interval Compared to Overall Mean (4.4075) for  $p = 2$  and  $f(t) = t$ .

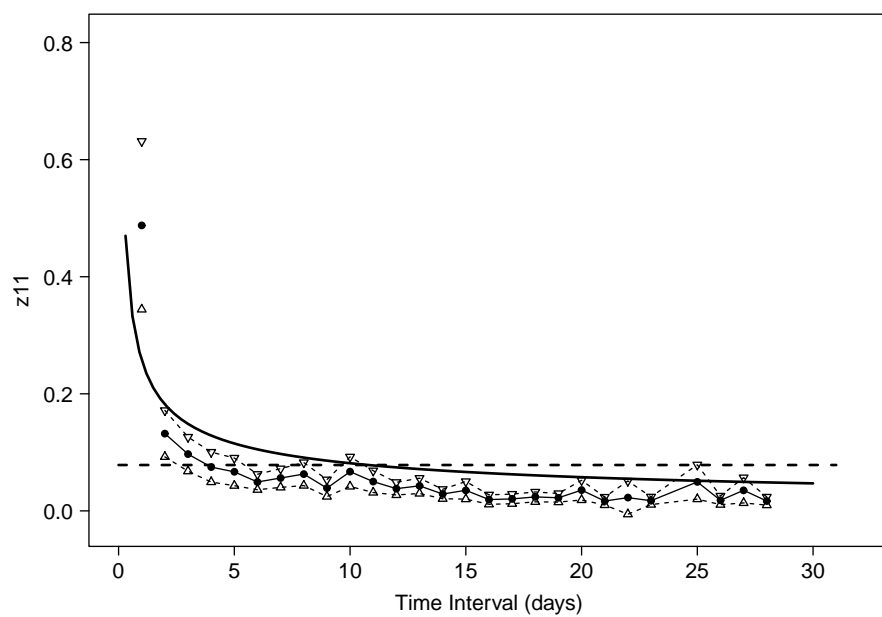

Figure S1.149. MLE of  $z_{11}$  by Time Interval Compared to Overall Mean (0.0784) for  $p = 6$  and  $f(t) = t$ .

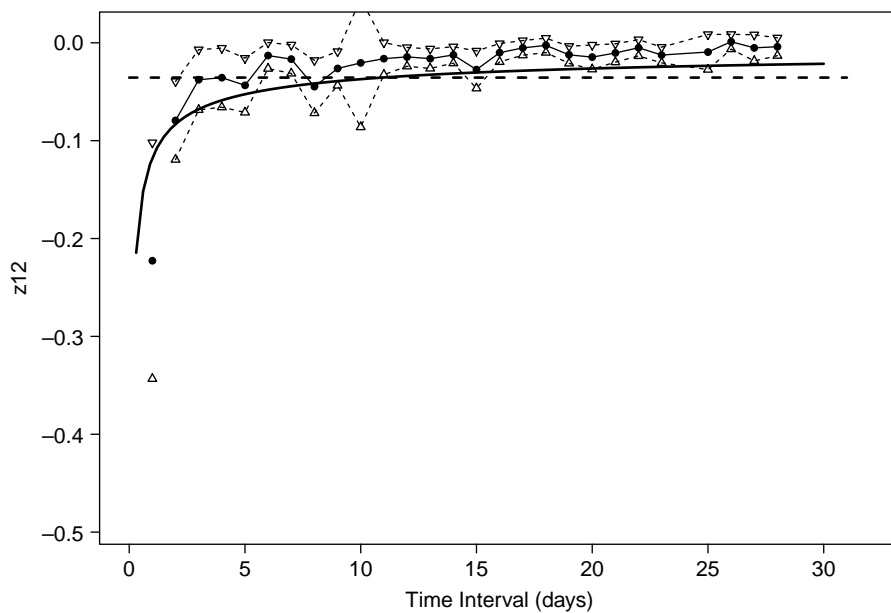

Figure S1.150. MLE of  $z_{12}$  by Time Interval Compared to Overall Mean ( $-0.0356$ ) for  $p = 6$  and  $f(t) = t$ .

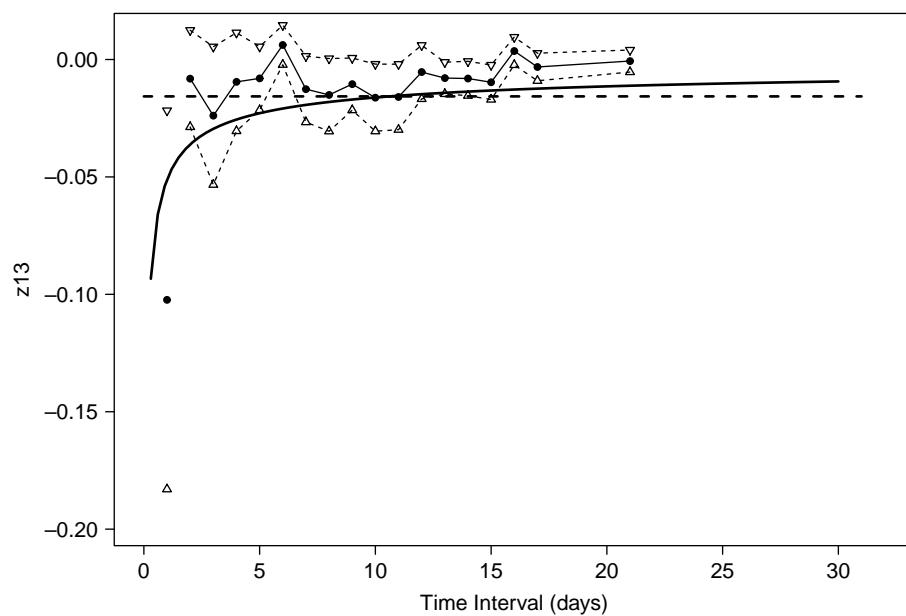

Figure S1.151. MLE of  $z_{13}$  by Time Interval Compared to Overall Mean ( $-0.0157$ ) for  $p = 6$  and  $f(t) = t$ .

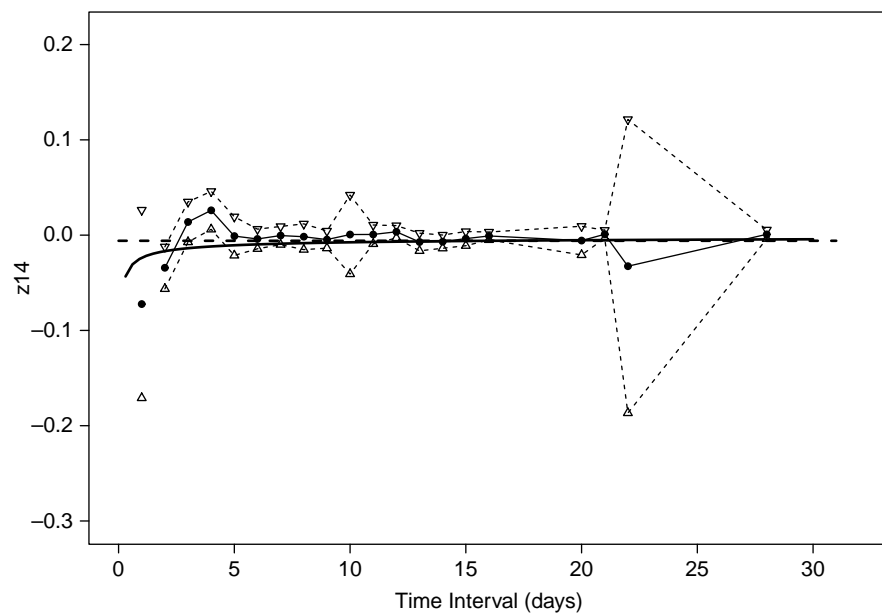

Figure S1.152. MLE of  $z_{14}$  by Time Interval Compared to Overall Mean ( $-0.0059$ ) for  $p = 6$  and  $f(t) = t$ .

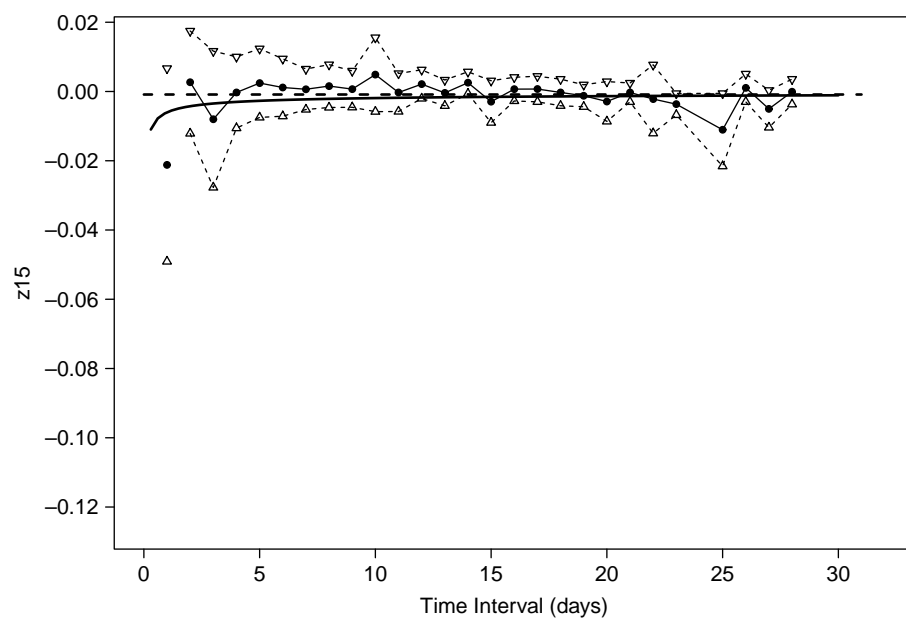

Figure S1.153. MLE of  $z_{15}$  by Time Interval Compared to Overall Mean ( $-9e-04$ ) for  $p = 6$  and  $f(t) = t$ .

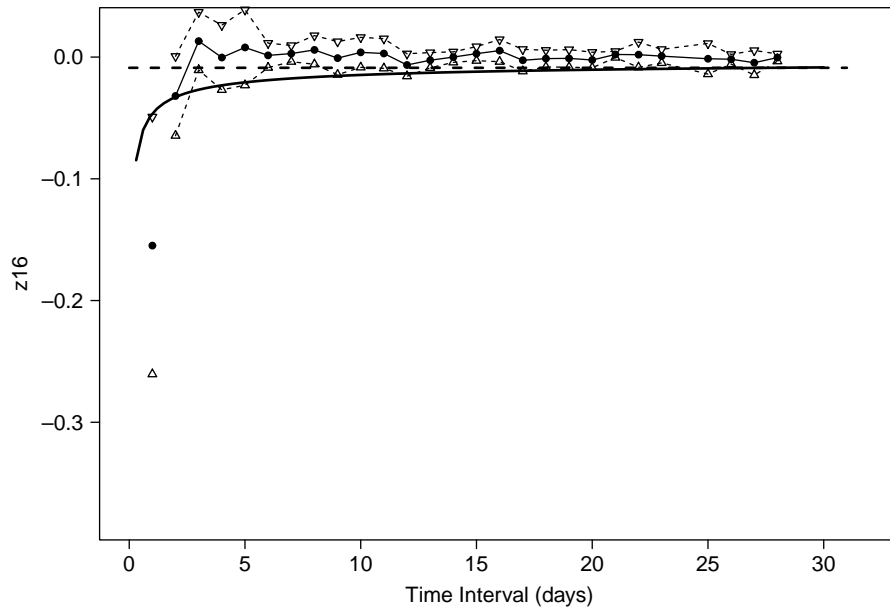

Figure S1.154. MLE of  $z_{16}$  by Time Interval Compared to Overall Mean ( $-0.0088$ ) for  $p = 6$  and  $f(t) = t$ .

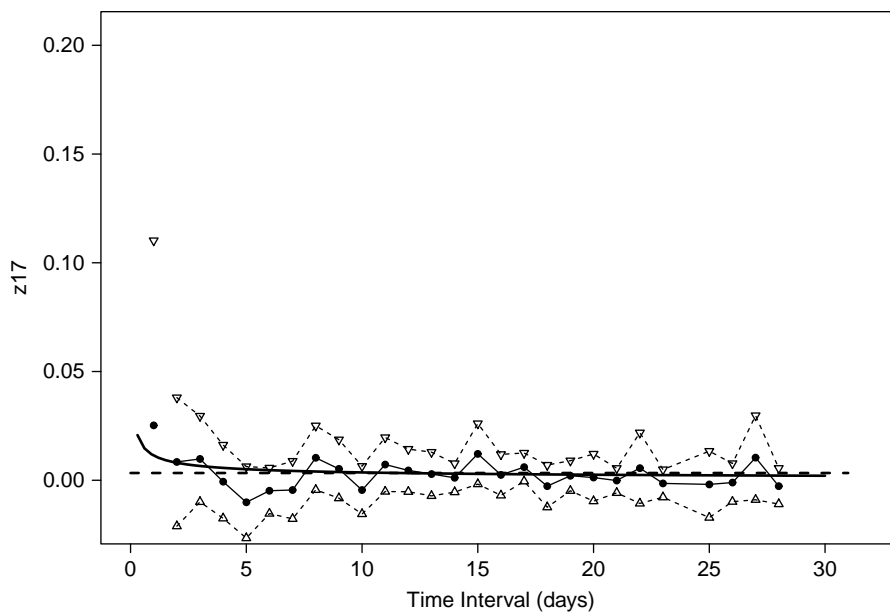

Figure S1.155. MLE of  $z_{17}$  by Time Interval Compared to Overall Mean ( $0.0033$ ) for  $p = 6$  and  $f(t) = t$ .

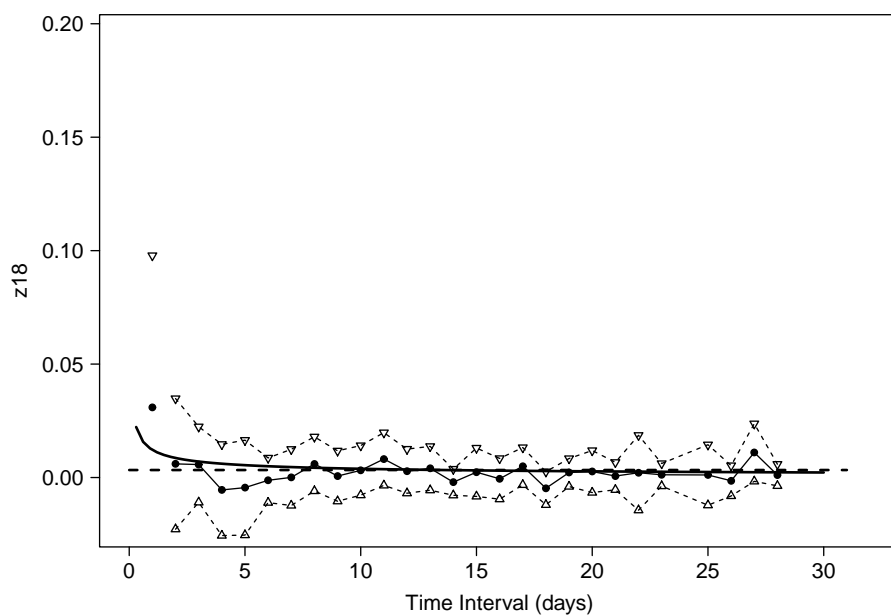

Figure S1.156. MLE of  $z_{18}$  by Time Interval Compared to Overall Mean (0.0033) for  $p = 6$  and  $f(t) = t$ .

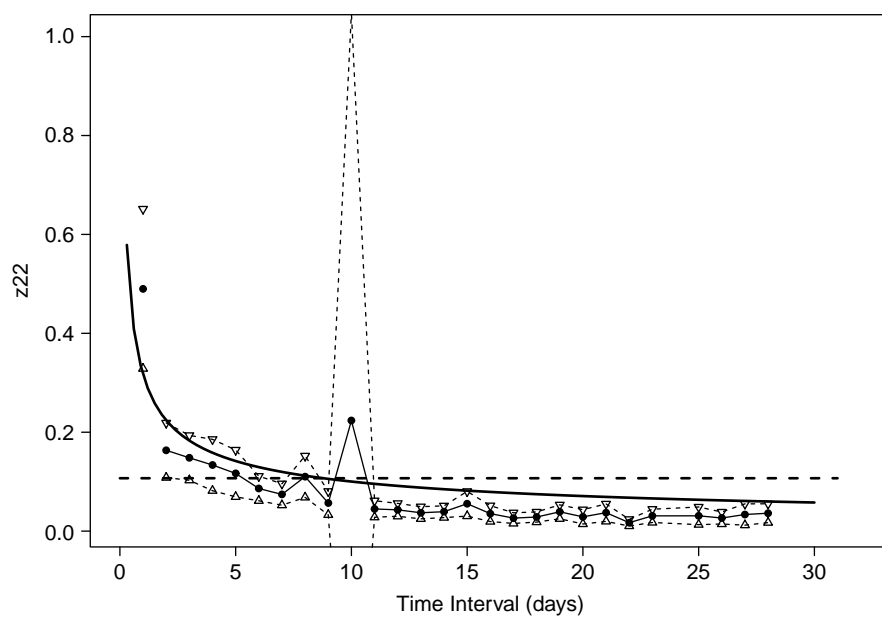

Figure S1.157. MLE of  $z_{22}$  by Time Interval Compared to Overall Mean (0.107) for  $p = 6$  and  $f(t) = t$ .

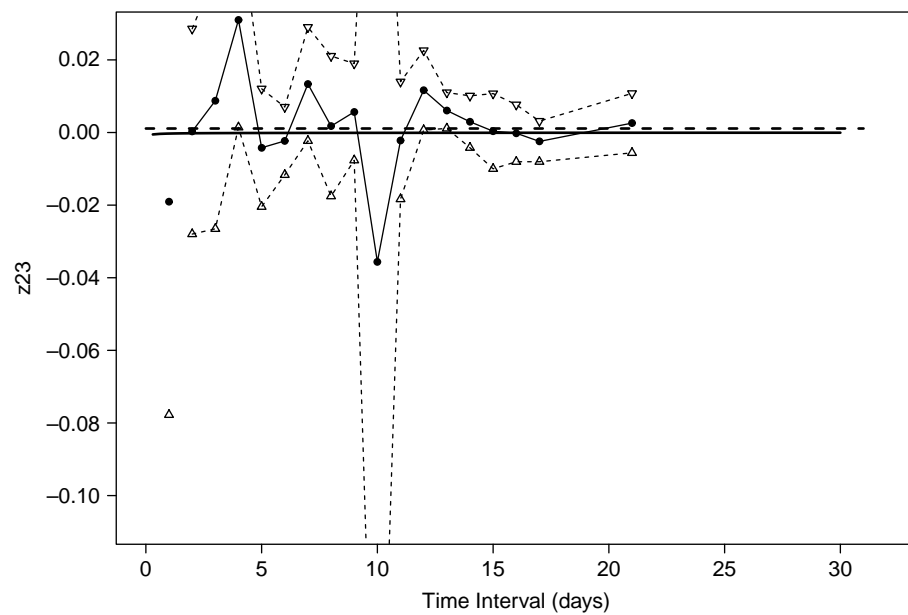

Figure S1.158. MLE of  $z_{23}$  by Time Interval Compared to Overall Mean (0.0011) for  $p = 6$  and  $f(t) = t$ .

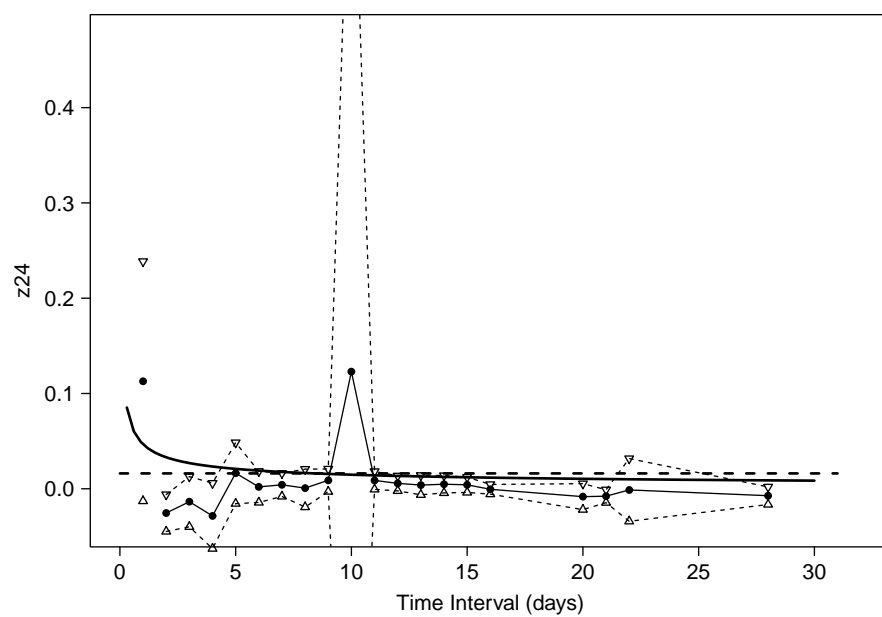

Figure S1.159. MLE of  $z_{24}$  by Time Interval Compared to Overall Mean (0.0161) for  $p = 6$  and  $f(t) = t$ .



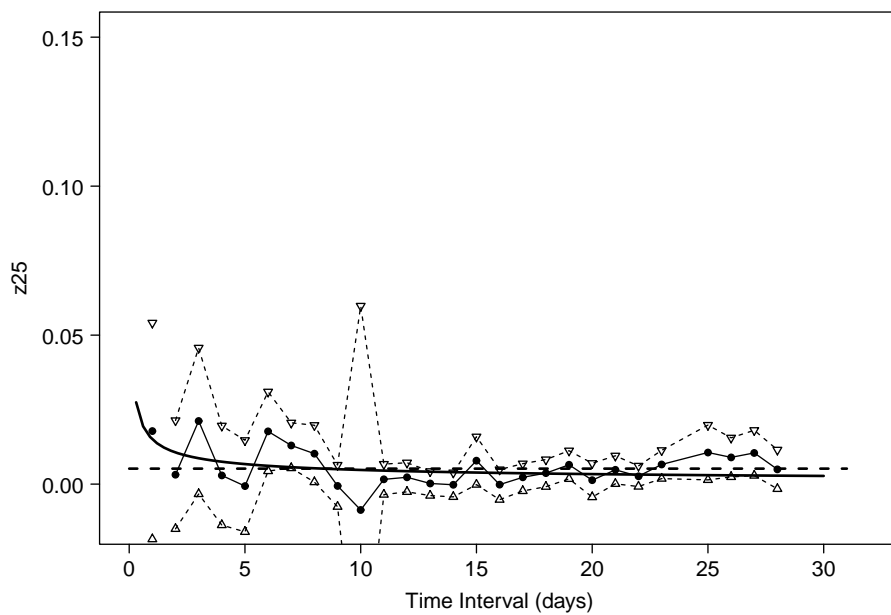

Figure S1.160. MLE of  $z_{25}$  by Time Interval Compared to Overall Mean (0.0052) for  $p = 6$  and  $f(t) = t$ .

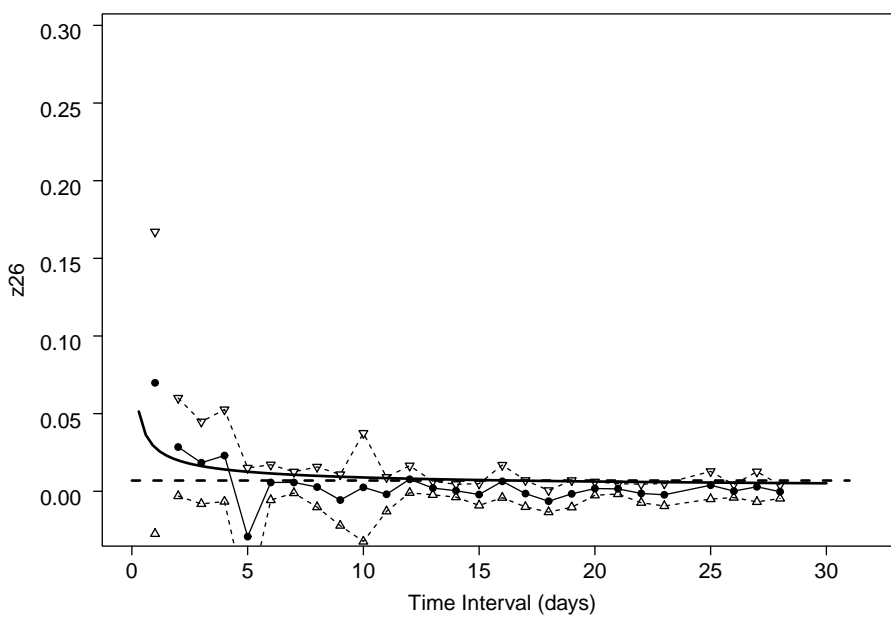

Figure S1.161. MLE of  $z_{26}$  by Time Interval Compared to Overall Mean (0.0069) for  $p = 6$  and  $f(t) = t$ .

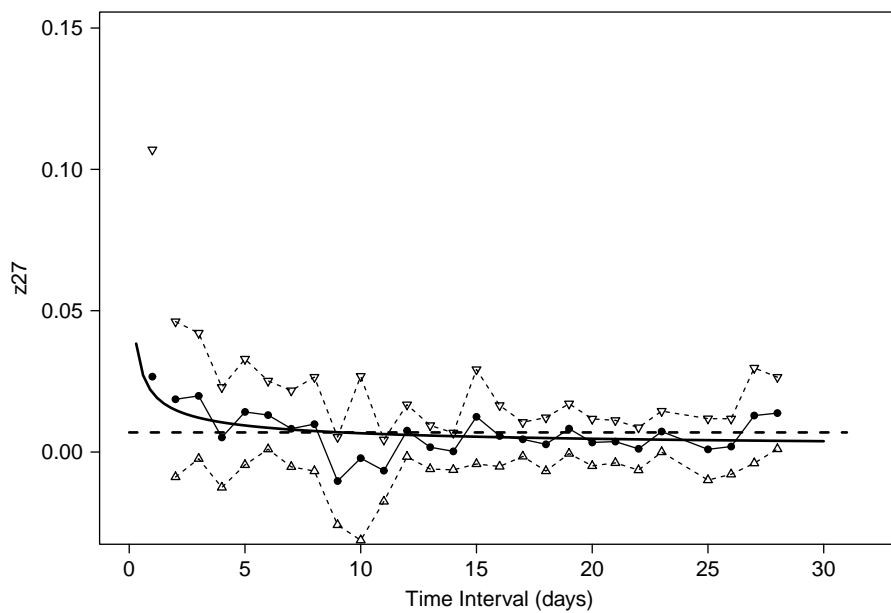

Figure S1.162. MLE of  $z_{27}$  by Time Interval Compared to Overall Mean (0.0069) for  $p = 6$  and  $f(t) = t$ .

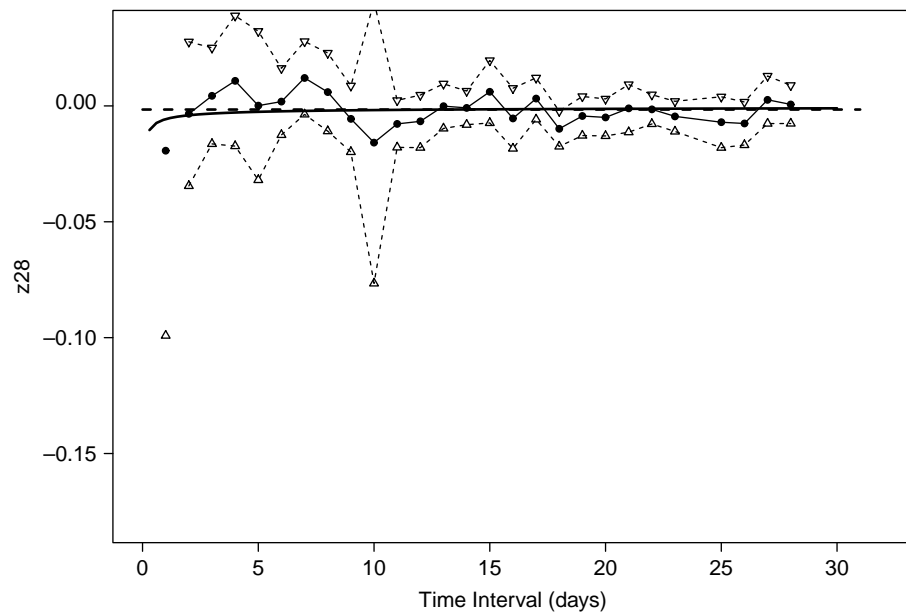

Figure S1.163. MLE of  $z_{28}$  by Time Interval Compared to Overall Mean (-0.0016) for  $p = 6$  and  $f(t) = t$ .

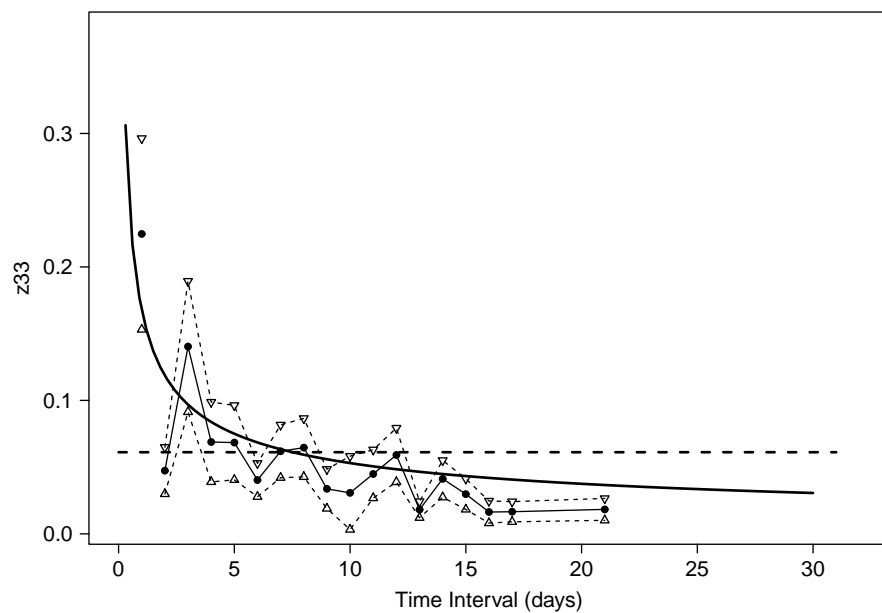

Figure S1.164. MLE of  $z_{33}$  by Time Interval Compared to Overall Mean (0.0612) for  $p = 6$  and  $f(t) = t$ .

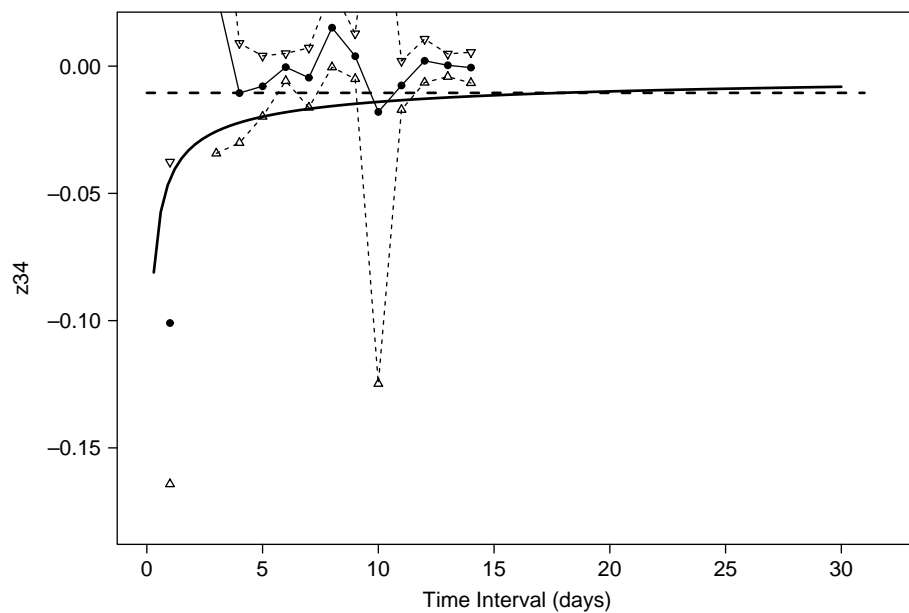

Figure S1.165. MLE of  $z_{34}$  by Time Interval Compared to Overall Mean (-0.0105) for  $p = 6$  and  $f(t) = t$ .

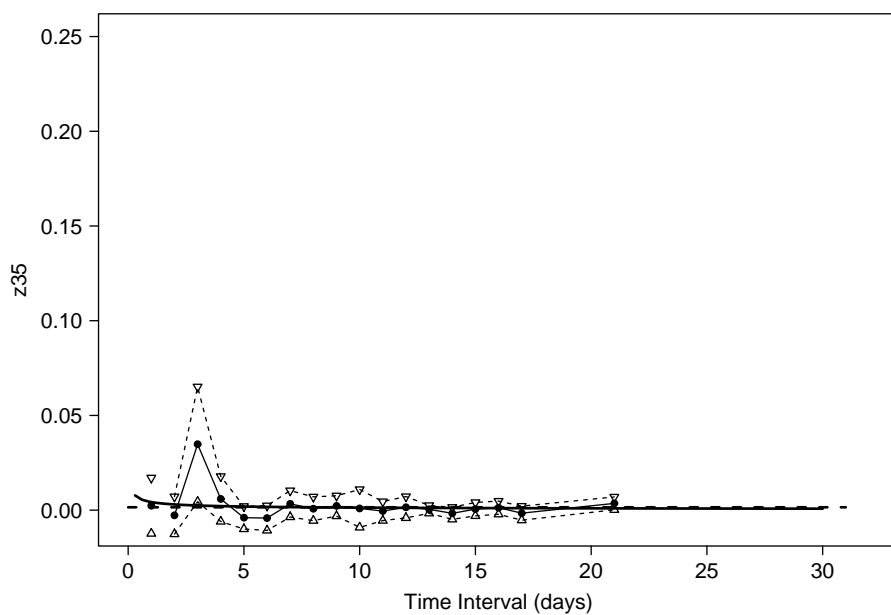

Figure S1.166. MLE of  $z_{35}$  by Time Interval Compared to Overall Mean (0.0015) for  $p = 6$  and  $f(t) = t$ .

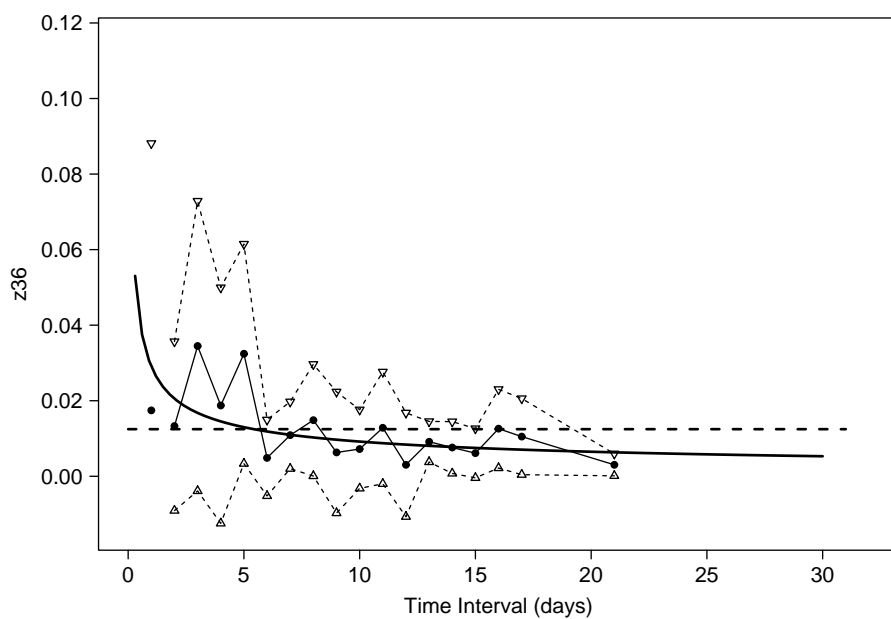

Figure S1.167. MLE of  $z_{36}$  by Time Interval Compared to Overall Mean (0.0125) for  $p = 6$  and  $f(t) = t$ .

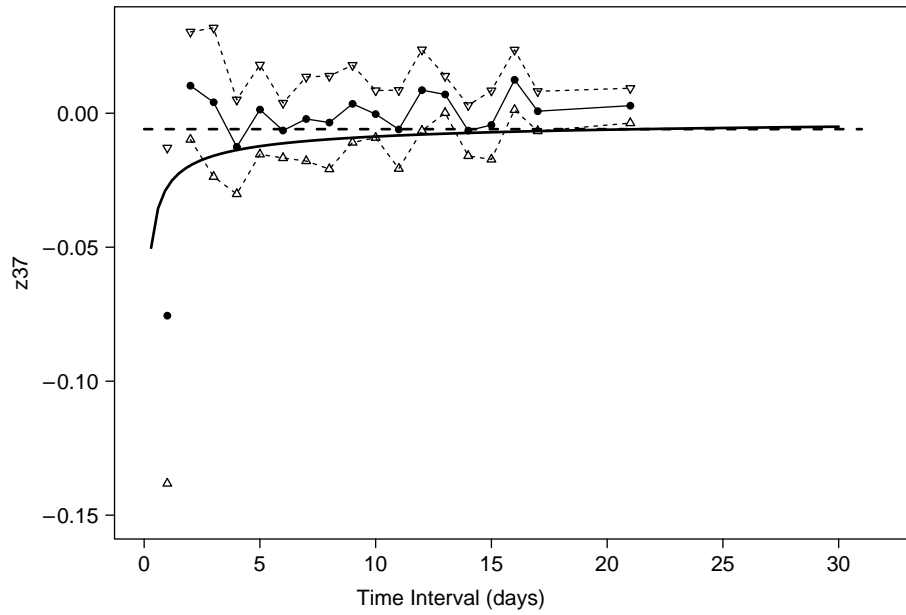

Figure S1.168. MLE of  $z_{37}$  by Time Interval Compared to Overall Mean ( $-0.0059$ ) for  $p = 6$  and  $f(t) = t$ .

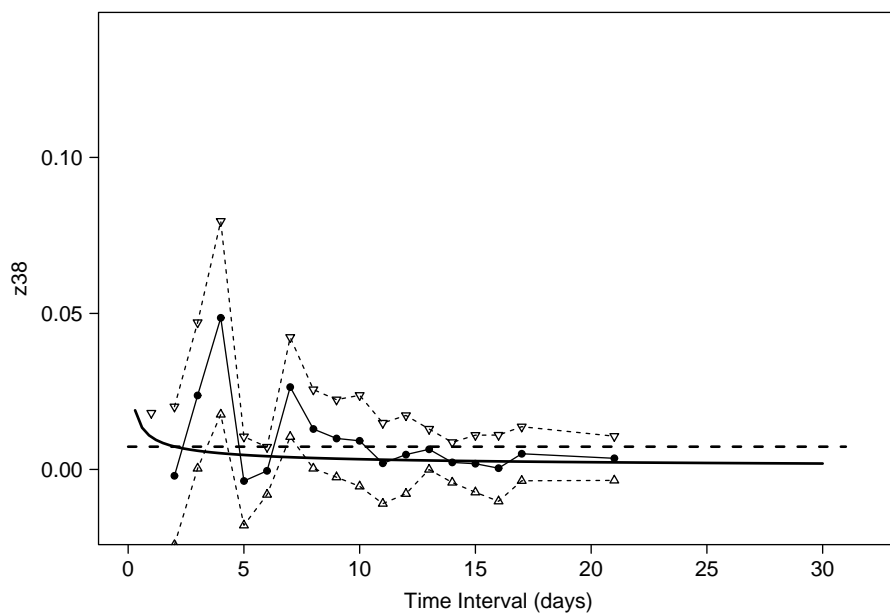

Figure S1.169. MLE of  $z_{38}$  by Time Interval Compared to Overall Mean ( $0.0073$ ) for  $p = 6$  and  $f(t) = t$ .

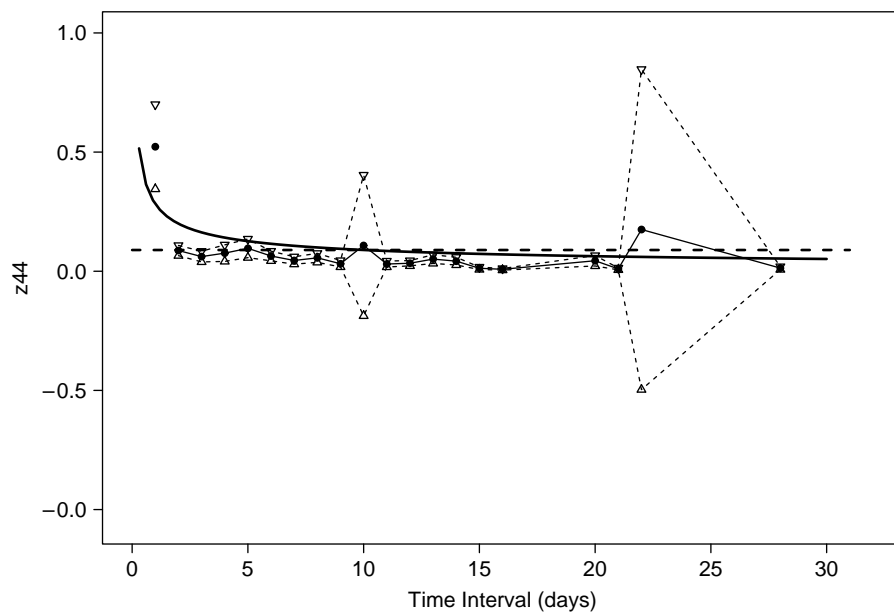

Figure S1.170. MLE of  $z_{44}$  by Time Interval Compared to Overall Mean (0.0891) for  $p = 6$  and  $f(t) = t$ .

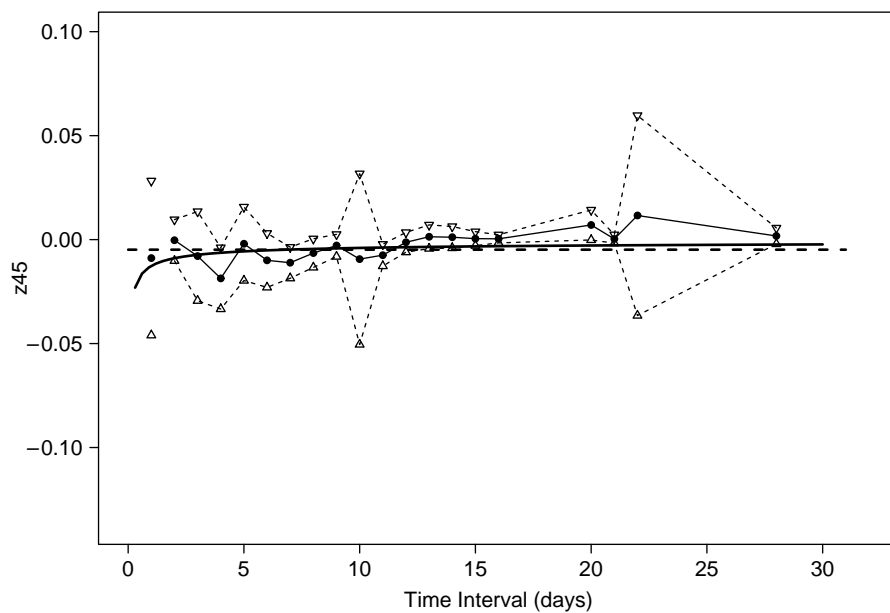

Figure S1.171. MLE of  $z_{45}$  by Time Interval Compared to Overall Mean (-0.0048) for  $p = 6$  and  $f(t) = t$ .

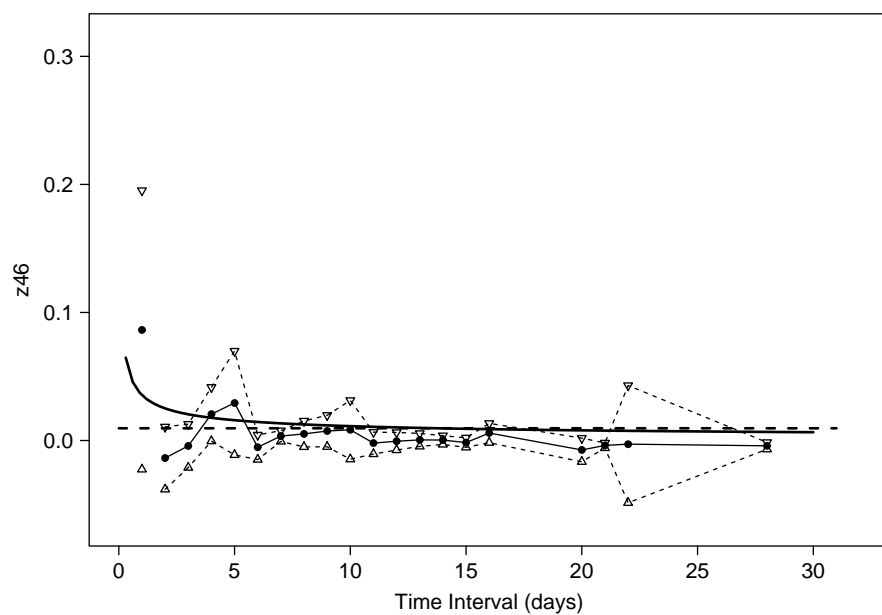

Figure S1.172. MLE of  $z_{46}$  by Time Interval Compared to Overall Mean (0.0095) for  $p = 6$  and  $f(t) = t$ .

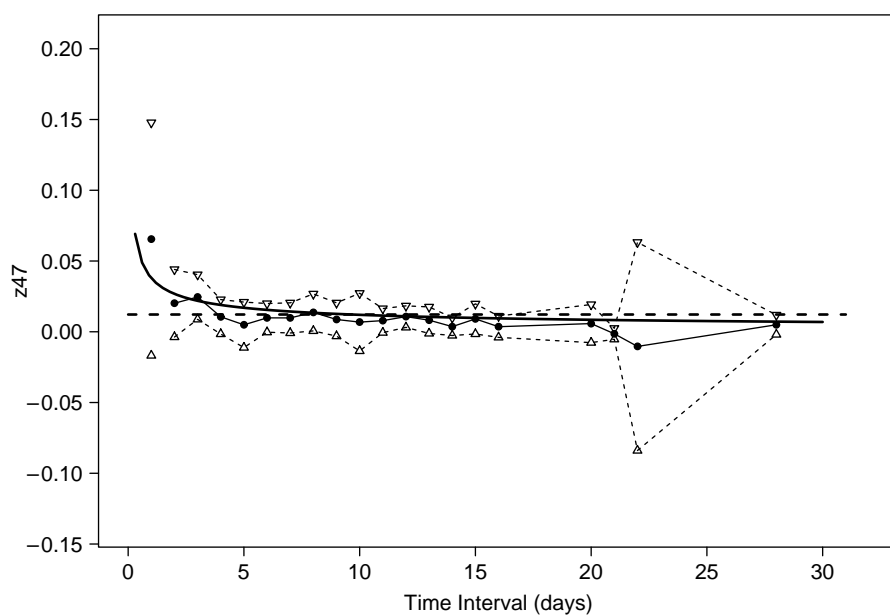

Figure S1.173. MLE of  $z_{47}$  by Time Interval Compared to Overall Mean (0.0122) for  $p = 6$  and  $f(t) = t$ .

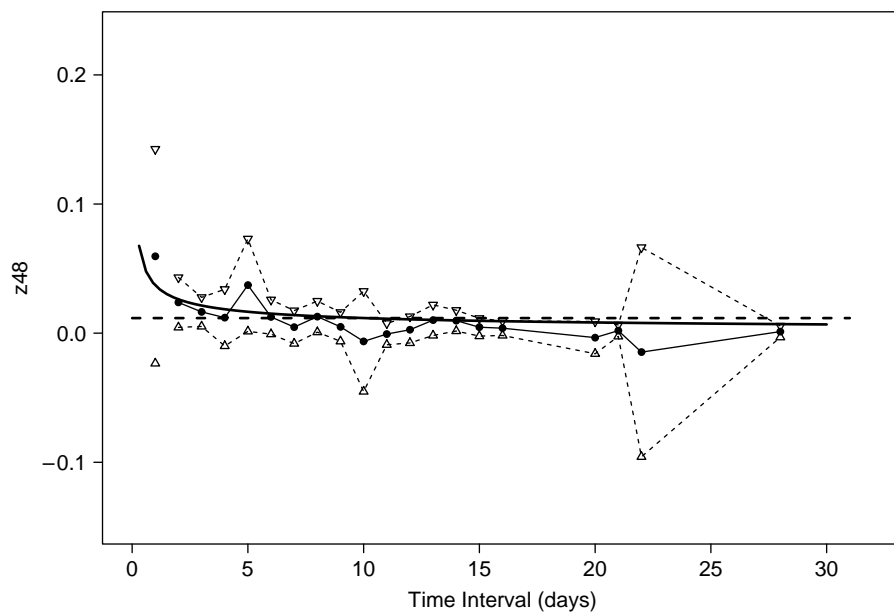

Figure S1.174. MLE of  $z_{48}$  by Time Interval Compared to Overall Mean (0.0117) for  $p = 6$  and  $f(t) = t$ .

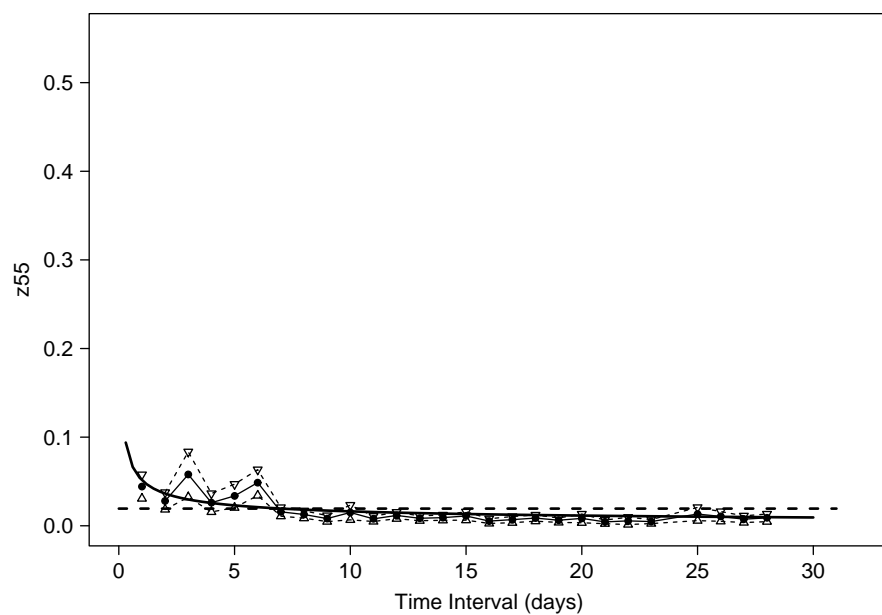

Figure S1.175. MLE of  $z_{55}$  by Time Interval Compared to Overall Mean (0.0194) for  $p = 6$  and  $f(t) = t$ .



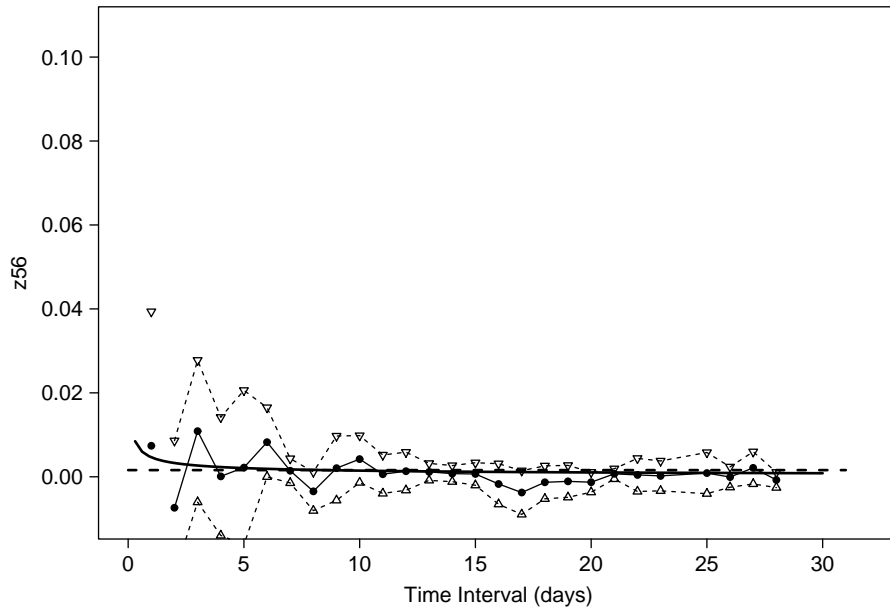

Figure S1.176. MLE of  $z_{56}$  by Time Interval Compared to Overall Mean (0.0016) for  $p = 6$  and  $f(t) = t$ .

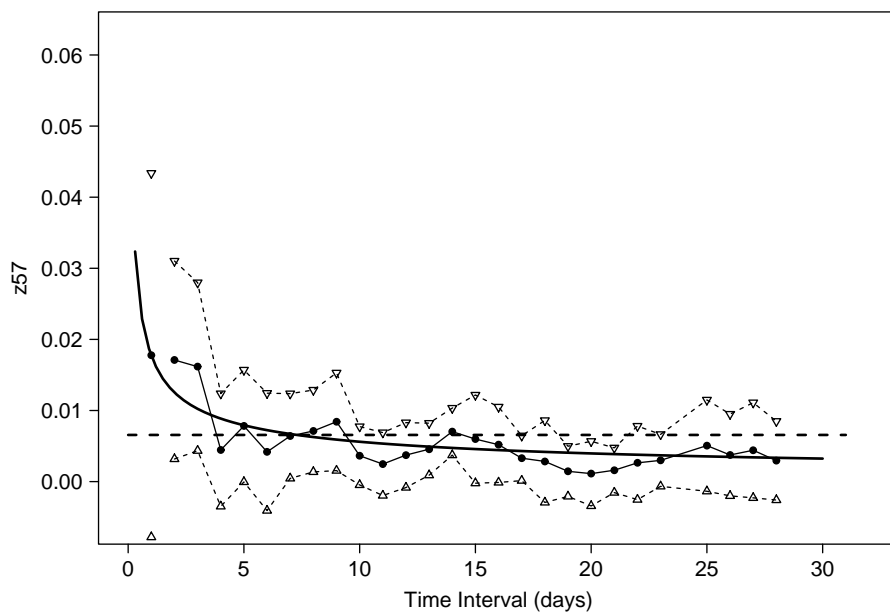

Figure S1.177. MLE of  $z_{57}$  by Time Interval Compared to Overall Mean (0.0066) for  $p = 6$  and  $f(t) = t$ .

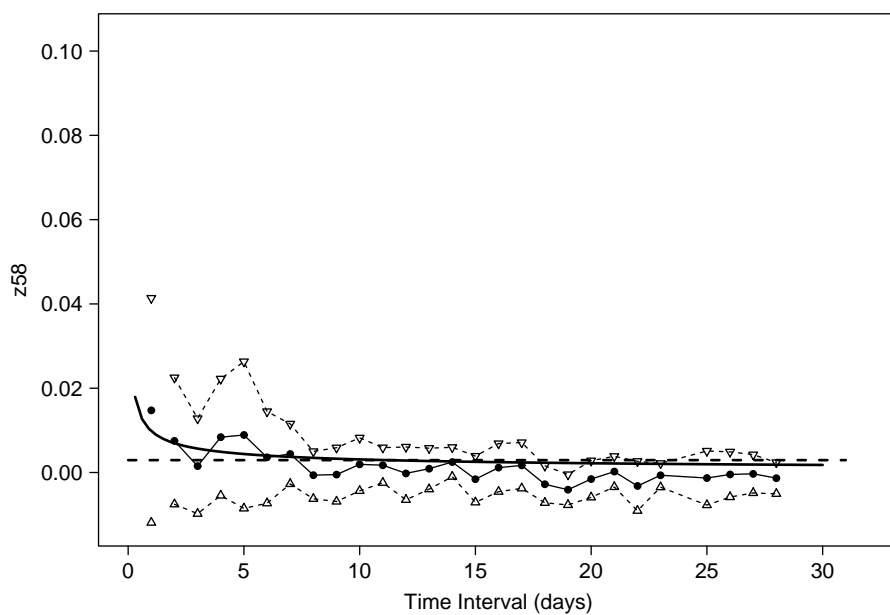

Figure S1.178. MLE of  $z_{58}$  by Time Interval Compared to Overall Mean (0.0029) for  $p = 6$  and  $f(t) = t$ .

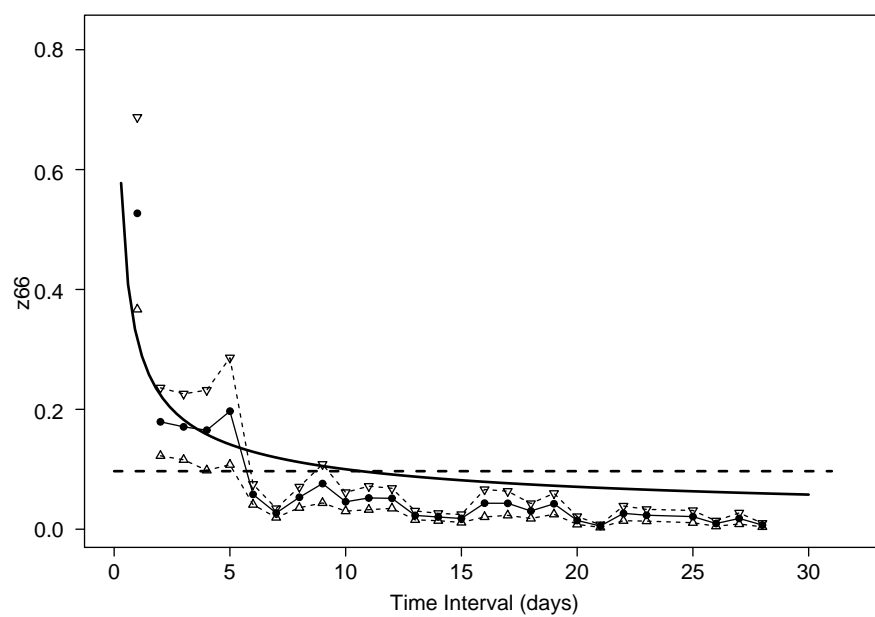

Figure S1.179. MLE of  $z_{66}$  by Time Interval Compared to Overall Mean (0.0968) for  $p = 6$  and  $f(t) = t$ .

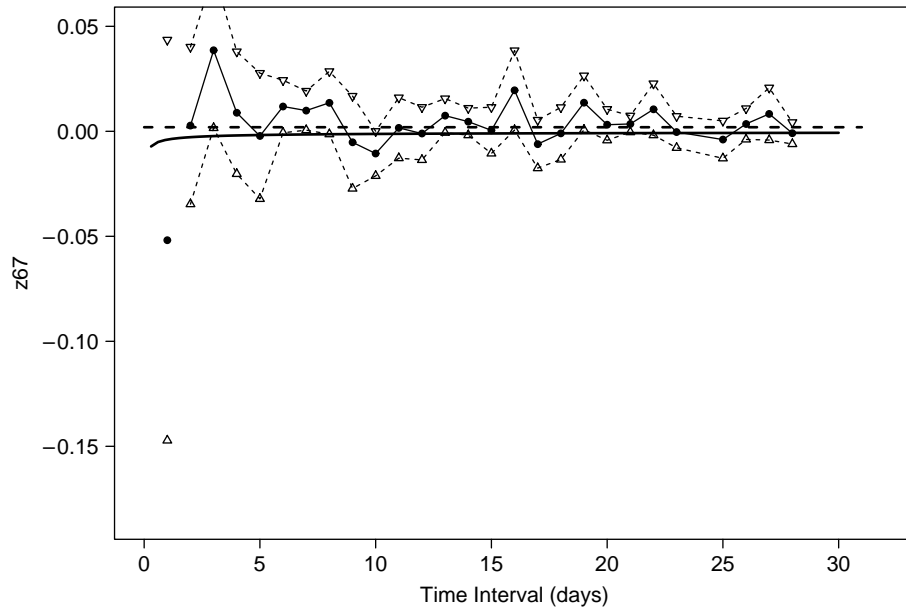

Figure S1.180. MLE of  $z_{67}$  by Time Interval Compared to Overall Mean (0.0019) for  $p = 6$  and  $f(t) = t$ .

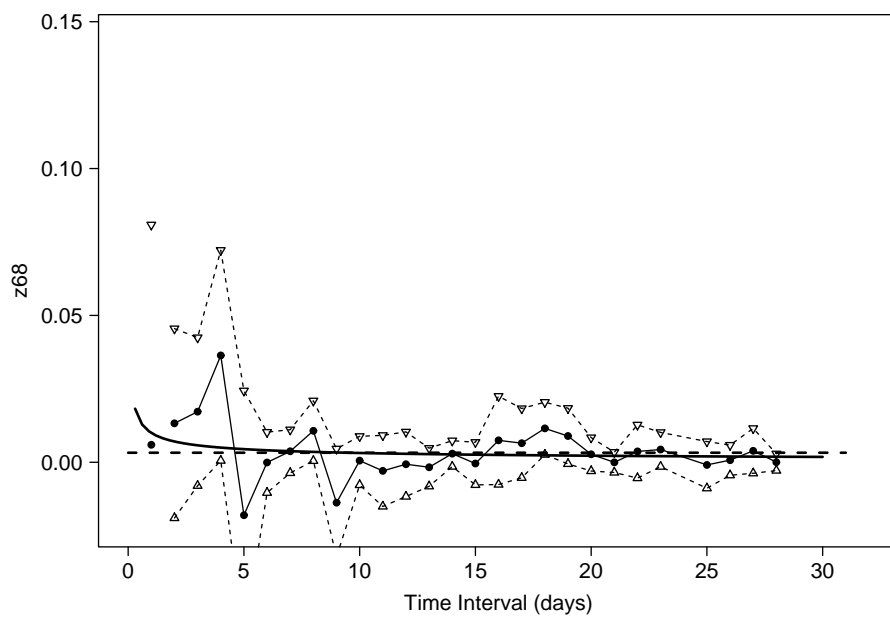

Figure S1.181. MLE of  $z_{68}$  by Time Interval Compared to Overall Mean (0.0032) for  $p = 6$  and  $f(t) = t$ .

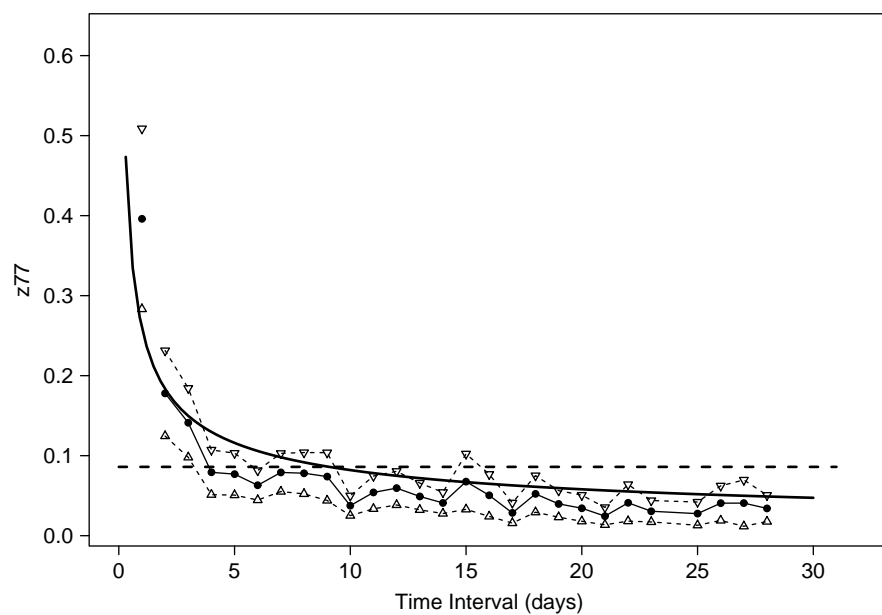

Figure S1.182. MLE of  $z_{77}$  by Time Interval Compared to Overall Mean (0.086) for  $p = 6$  and  $f(t) = t$ .

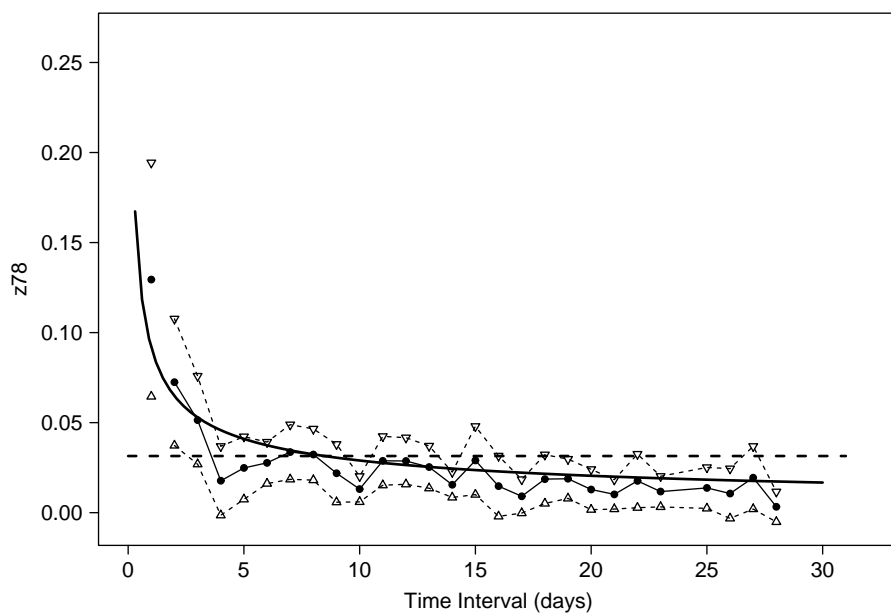

Figure S1.183. MLE of  $z_{78}$  by Time Interval Compared to Overall Mean (0.0315) for  $p = 6$  and  $f(t) = t$ .

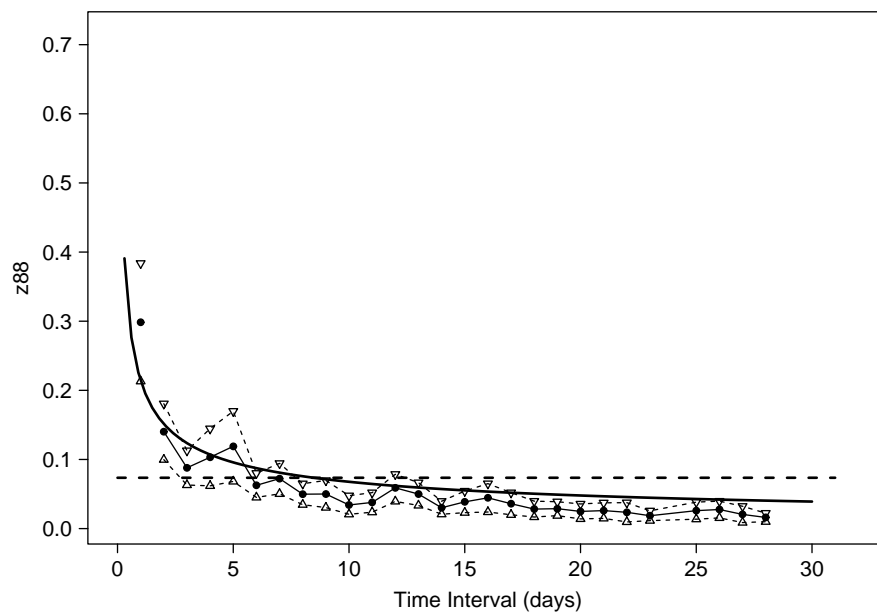

Figure S1.184. MLE of  $z_{88}$  by Time Interval Compared to Overall Mean (0.0735) for  $p = 6$  and  $f(t) = t$ .

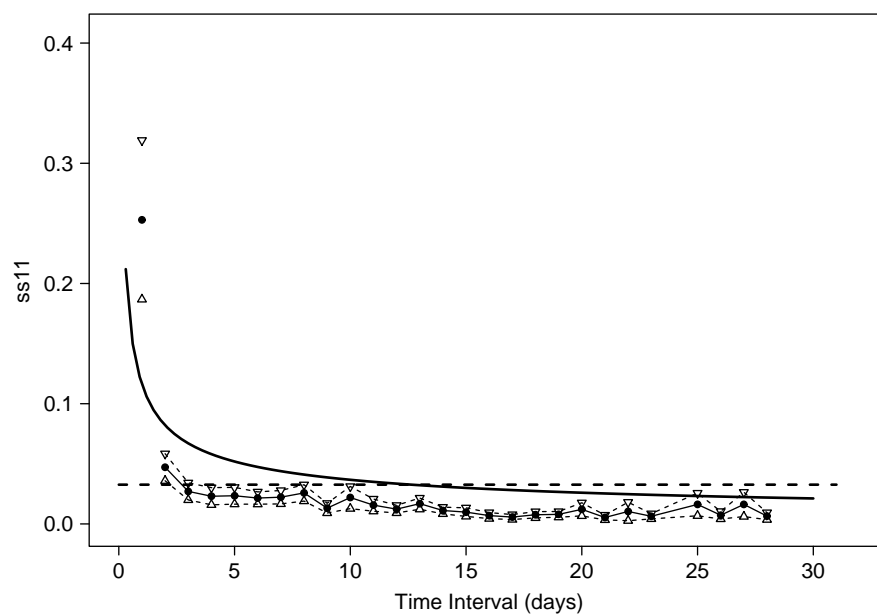

Figure S1.185. MLE of  $ss_{11}$  by Time Interval Compared to Overall Mean (0.0327) for  $p = 6$  and  $f(t) = t$ .

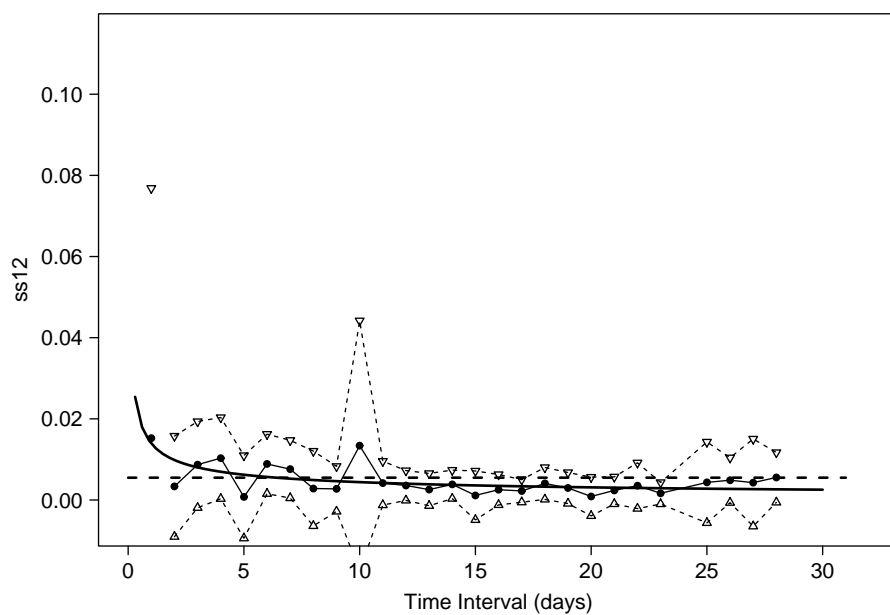

Figure S1.186. MLE of ss12 by Time Interval Compared to Overall Mean (0.0055) for  $p = 6$  and  $f(t) = t$ .

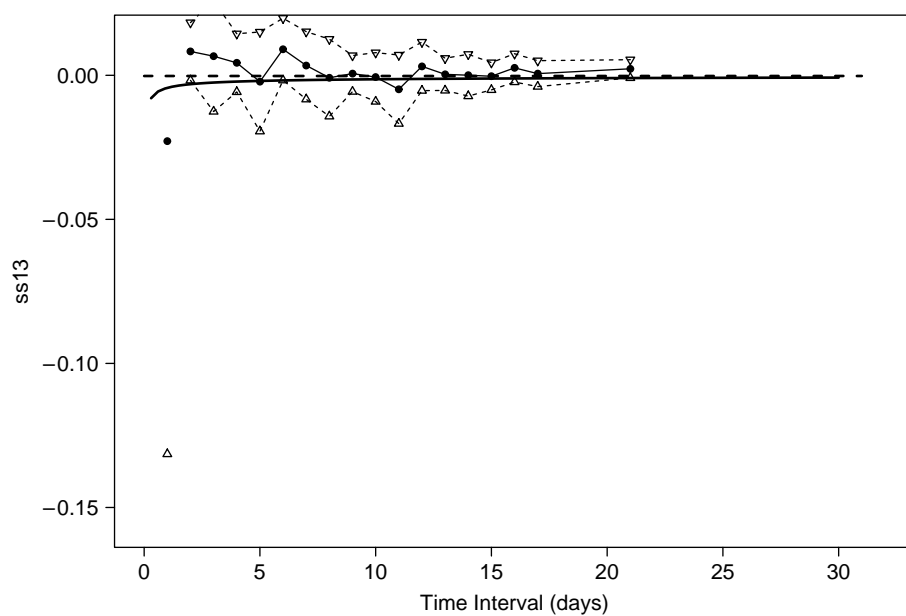

Figure S1.187. MLE of ss13 by Time Interval Compared to Overall Mean ( $-2e-04$ ) for  $p = 6$  and  $f(t) = t$ .

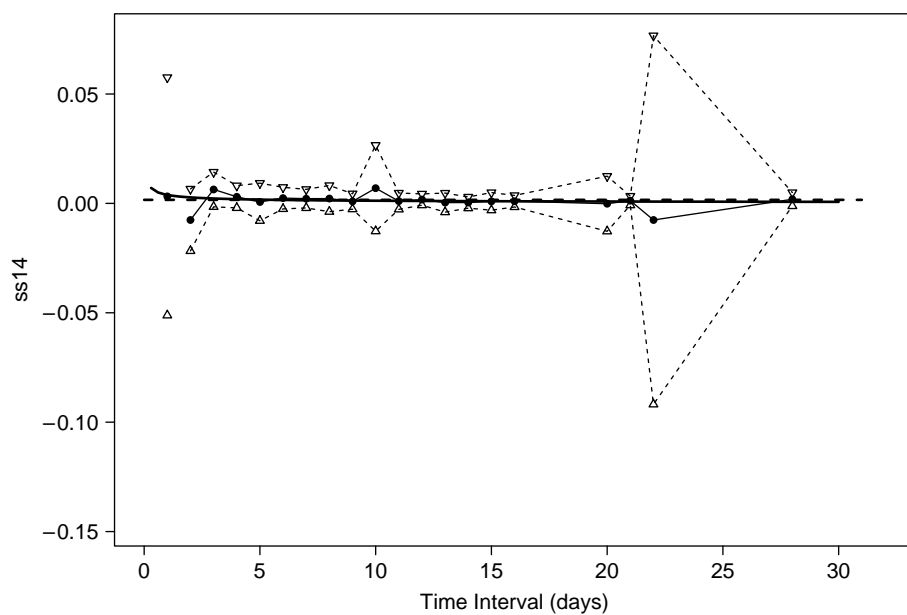

Figure S1.188. MLE of ss14 by Time Interval Compared to Overall Mean (0.0016) for  $p = 6$  and  $f(t) = t$ .

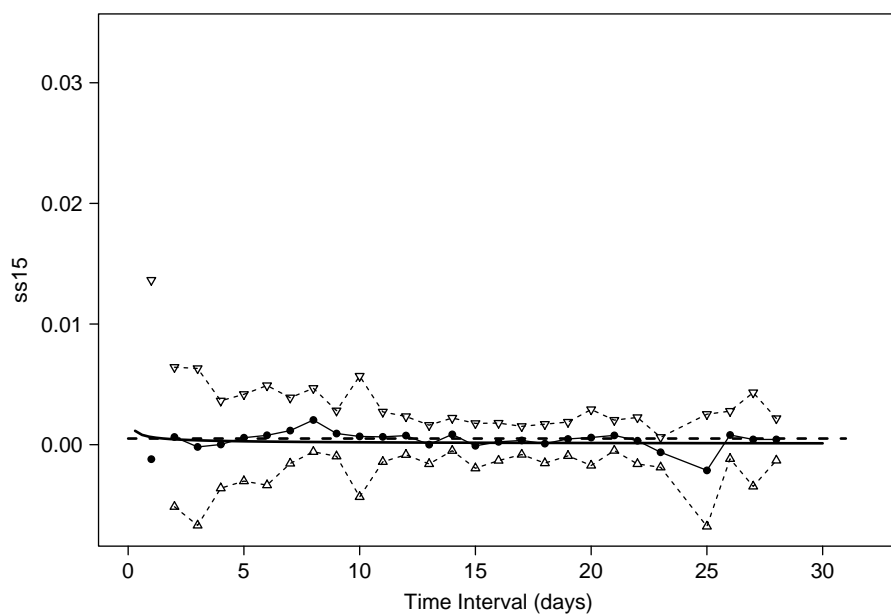

Figure S1.189. MLE of ss15 by Time Interval Compared to Overall Mean ( $5e-04$ ) for  $p = 6$  and  $f(t) = t$ .

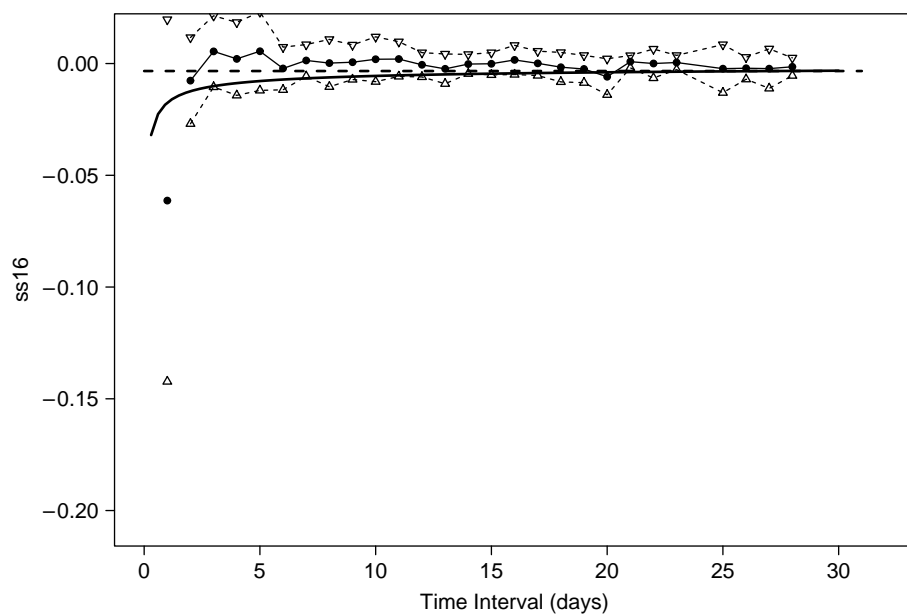

Figure S1.190. MLE of  $ss16$  by Time Interval Compared to Overall Mean ( $-0.0033$ ) for  $p = 6$  and  $f(t) = t$ .

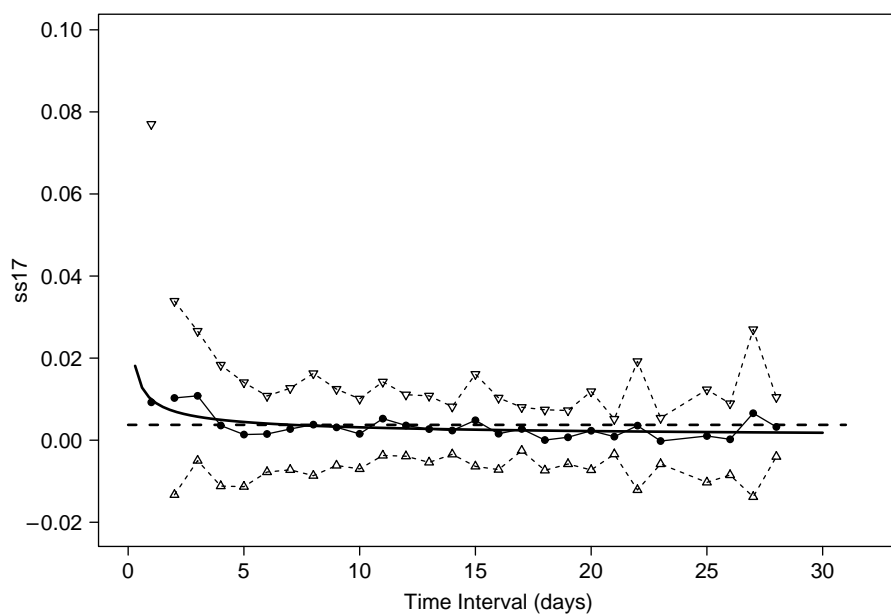

Figure S1.191. MLE of  $ss17$  by Time Interval Compared to Overall Mean ( $0.0037$ ) for  $p = 6$  and  $f(t) = t$ .



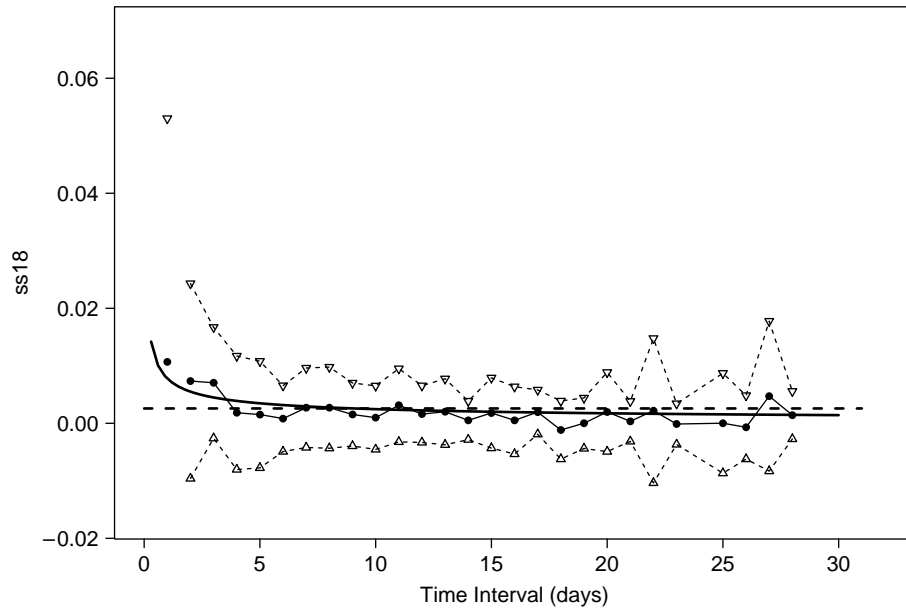

Figure S1.192. MLE of ss18 by Time Interval Compared to Overall Mean (0.0026) for  $p = 6$  and  $f(t) = t$ .

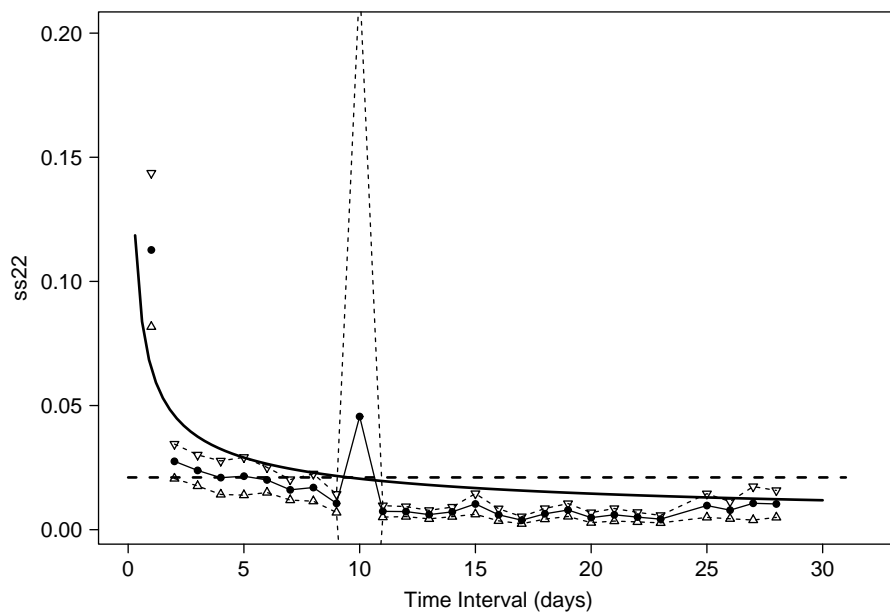

Figure S1.193. MLE of ss22 by Time Interval Compared to Overall Mean (0.021) for  $p = 6$  and  $f(t) = t$ .

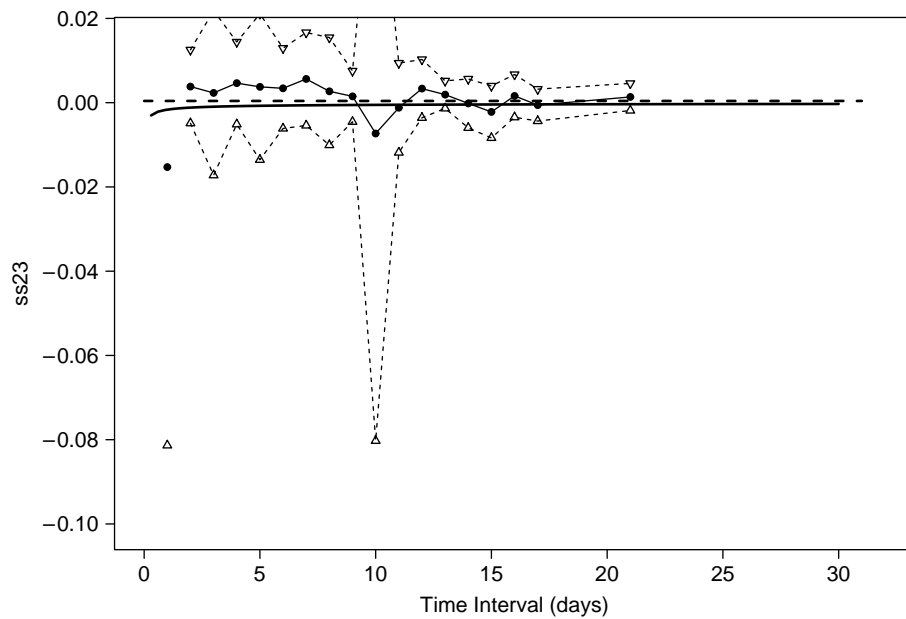

Figure S1.194. MLE of ss23 by Time Interval Compared to Overall Mean ( $4e-04$ ) for  $p = 6$  and  $f(t) = t$ .

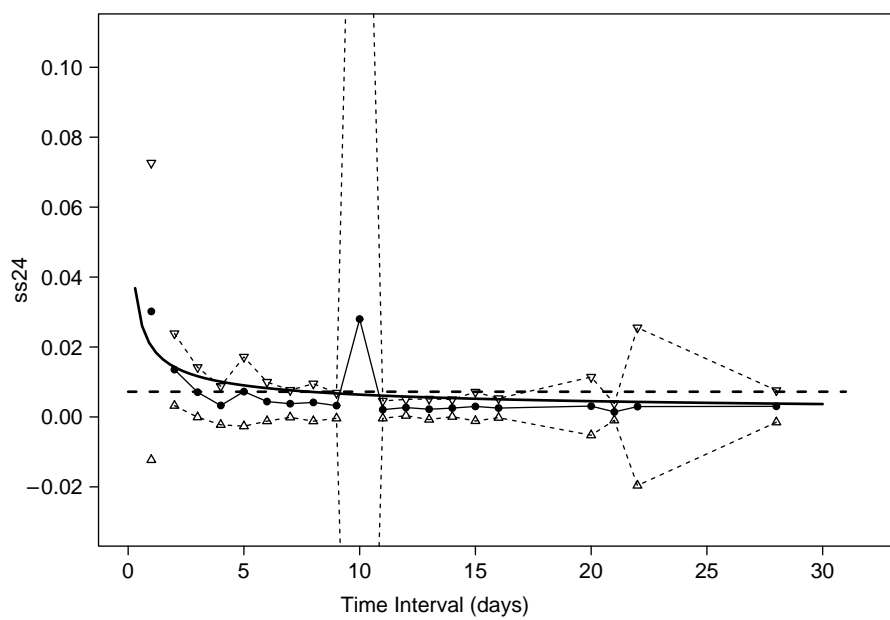

Figure S1.195. MLE of ss24 by Time Interval Compared to Overall Mean (0.0072) for  $p = 6$  and  $f(t) = t$ .

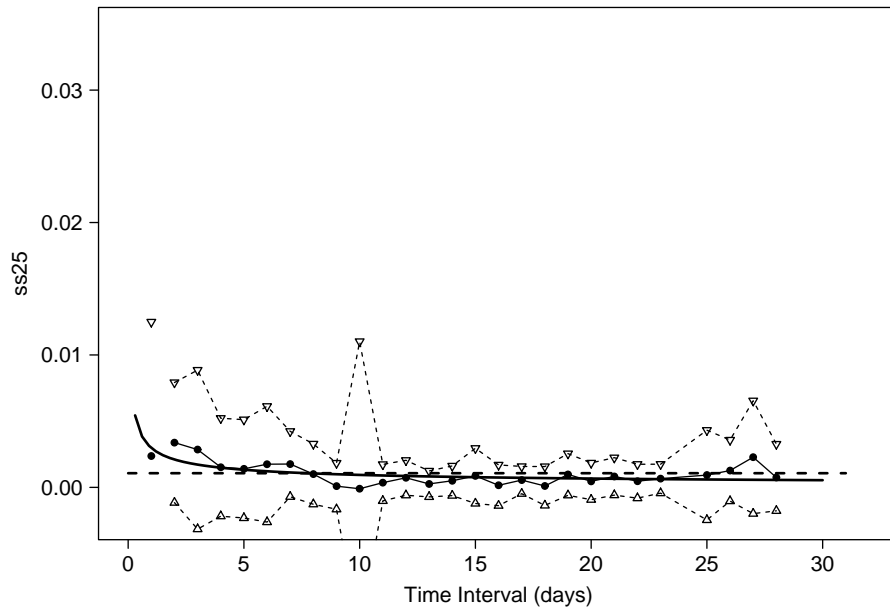

Figure S1.196. MLE of ss25 by Time Interval Compared to Overall Mean (0.0011) for  $p = 6$  and  $f(t) = t$ .

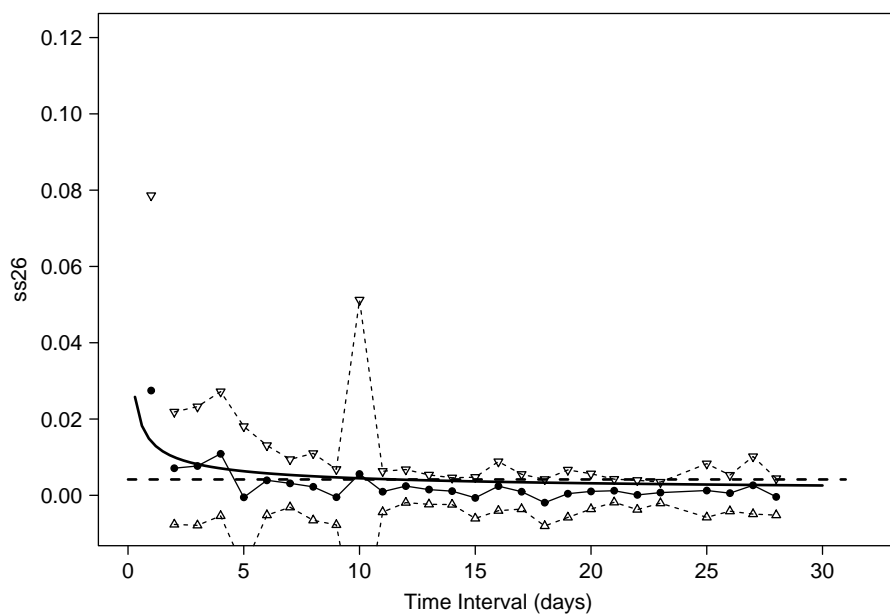

Figure S1.197. MLE of ss26 by Time Interval Compared to Overall Mean (0.0042) for  $p = 6$  and  $f(t) = t$ .

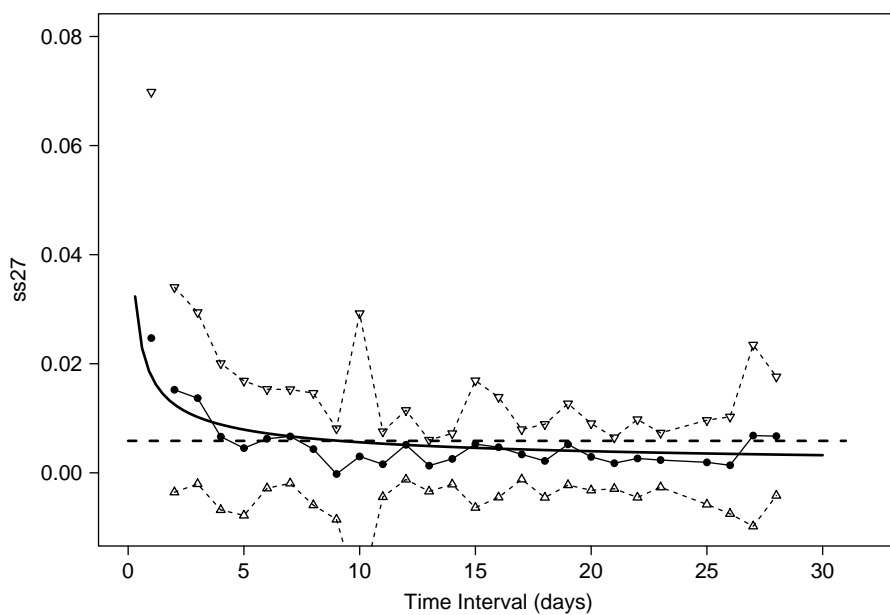

Figure S1.198. MLE of  $ss_{27}$  by Time Interval Compared to Overall Mean (0.0059) for  $p = 6$  and  $f(t)$ .

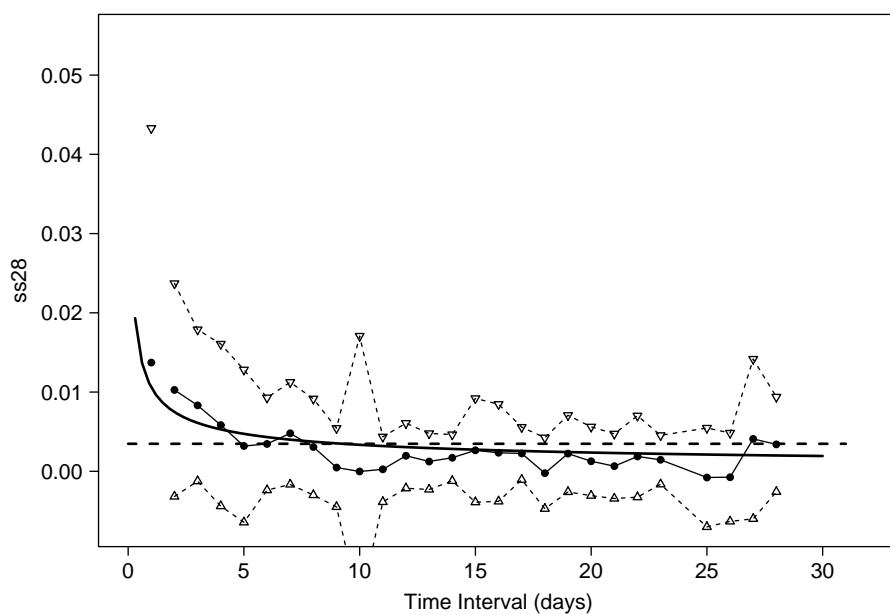

Figure S1.199. MLE of  $ss_{28}$  by Time Interval Compared to Overall Mean (0.0035) for  $p = 6$  and  $f(t) = t$ .

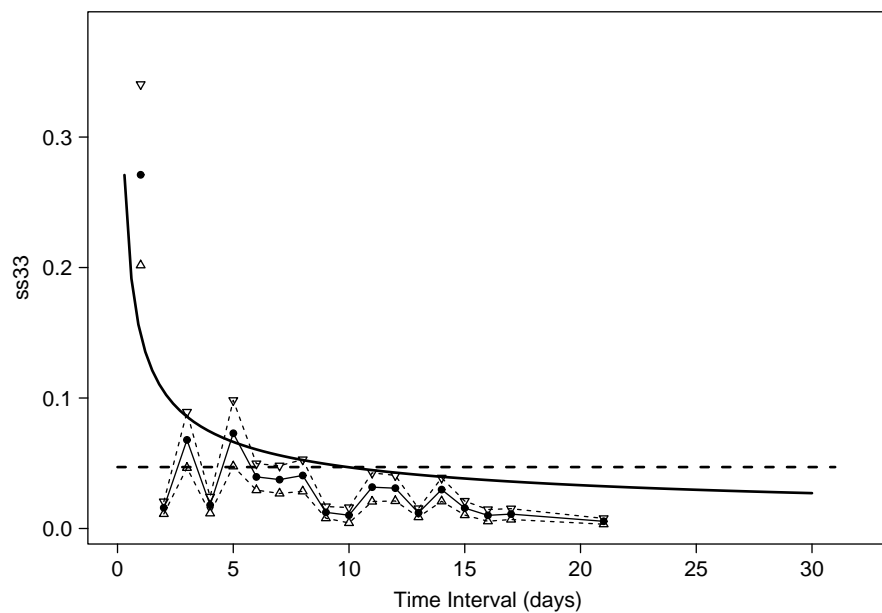

Figure S1.200. MLE of  $ss_{33}$  by Time Interval Compared to Overall Mean (0.0471) for  $p = 6$  and  $f(t) = t$ .

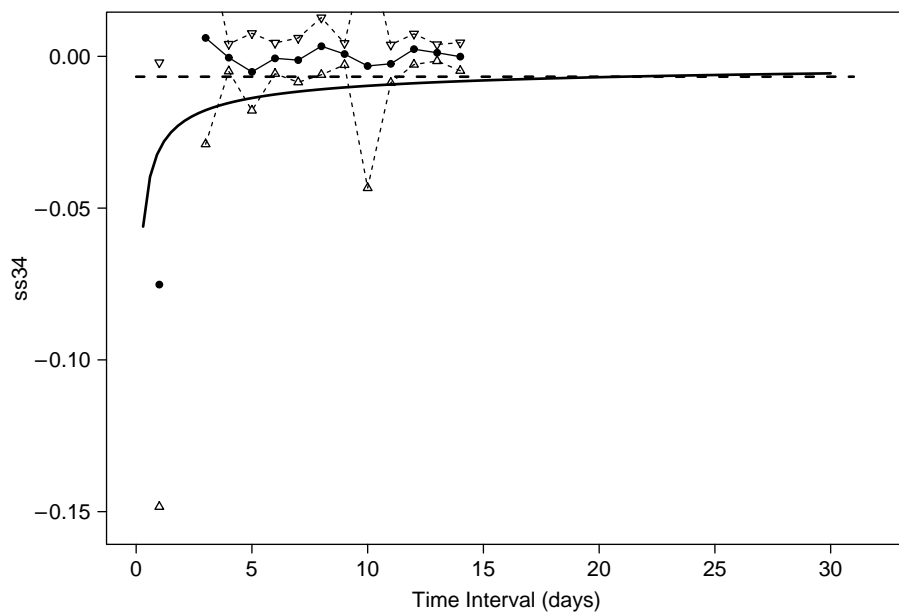

Figure S1.201. MLE of  $ss_{34}$  by Time Interval Compared to Overall Mean (-0.0067) for  $p = 6$  and  $f(t) = t$ .

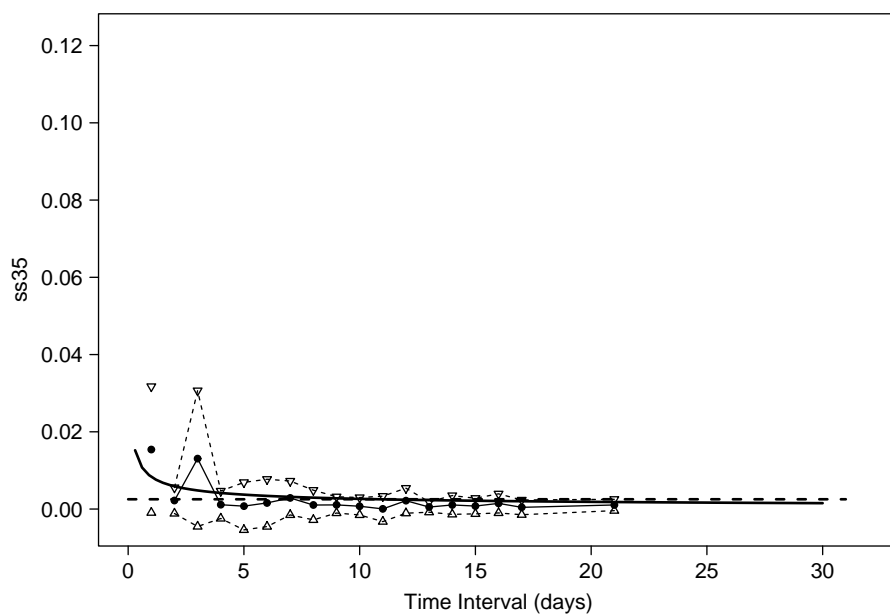

Figure S1.202. MLE of  $ss35$  by Time Interval Compared to Overall Mean (0.0025) for  $p = 6$  and  $f(t) = t$ .

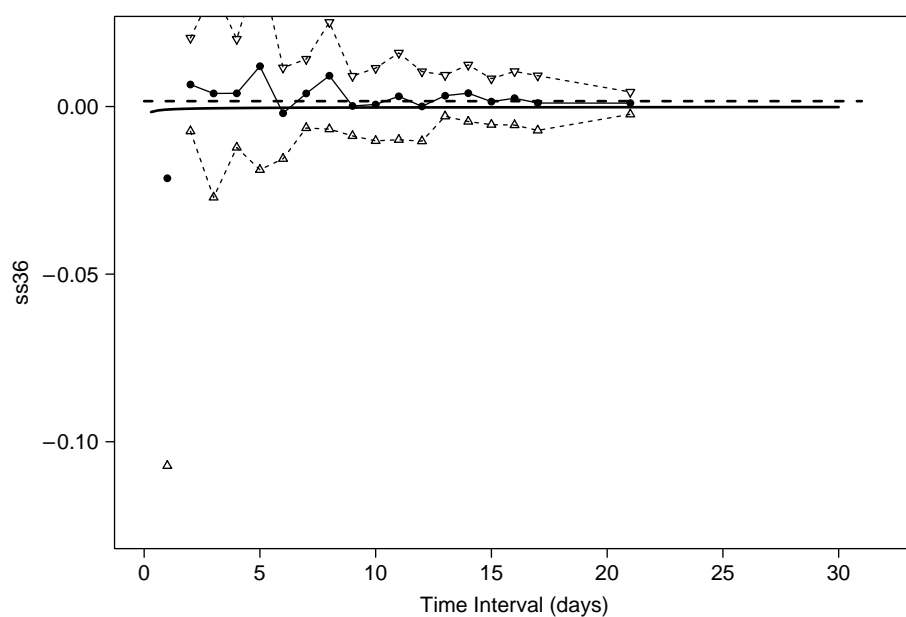

Figure S1.203. MLE of  $ss36$  by Time Interval Compared to Overall Mean (0.0016) for  $p = 6$  and  $f(t) = t$ .

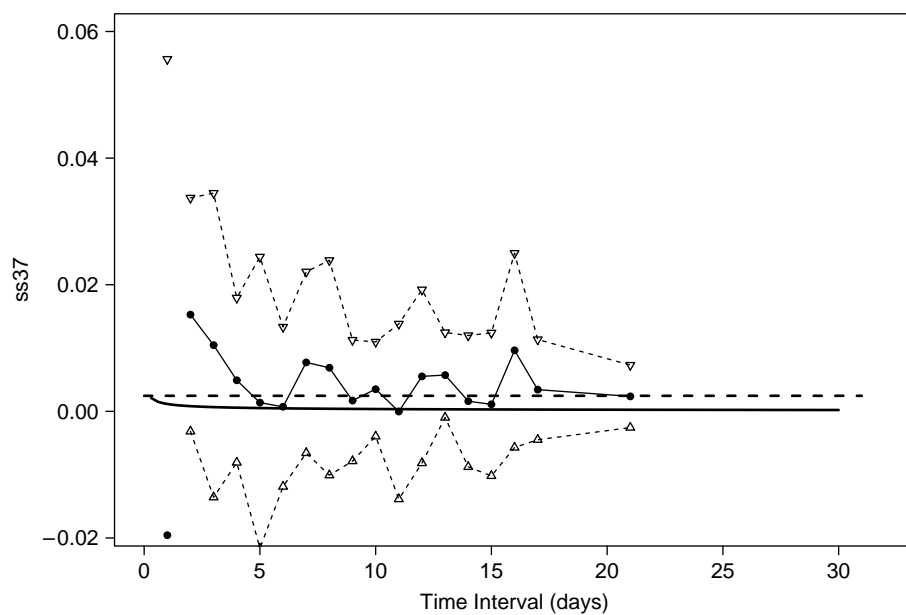

Figure S1.204. MLE of ss37 by Time Interval Compared to Overall Mean (0.0025) for  $p = 6$  and  $f(t) = t$ .

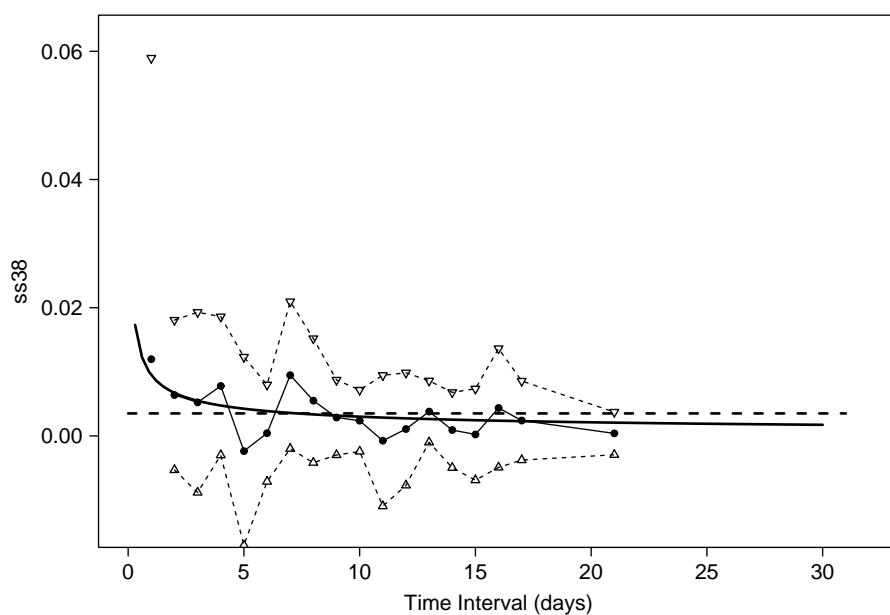

Figure S1.205. MLE of ss38 by Time Interval Compared to Overall Mean (0.0035) for  $p = 6$  and  $f(t) = t$ .

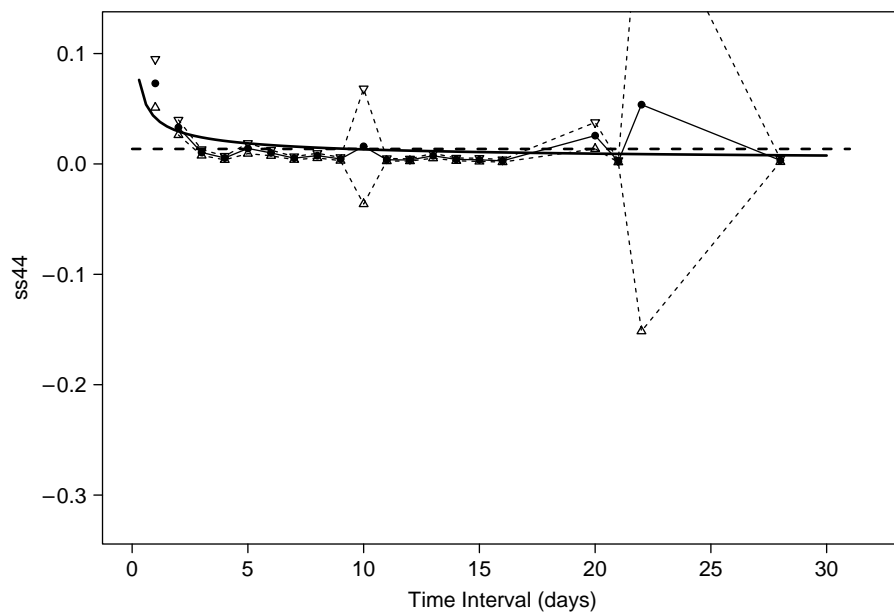

Figure S1.206. MLE of  $ss_{44}$  by Time Interval Compared to Overall Mean (0.0136) for  $p = 6$  and  $f(t) = t$ .

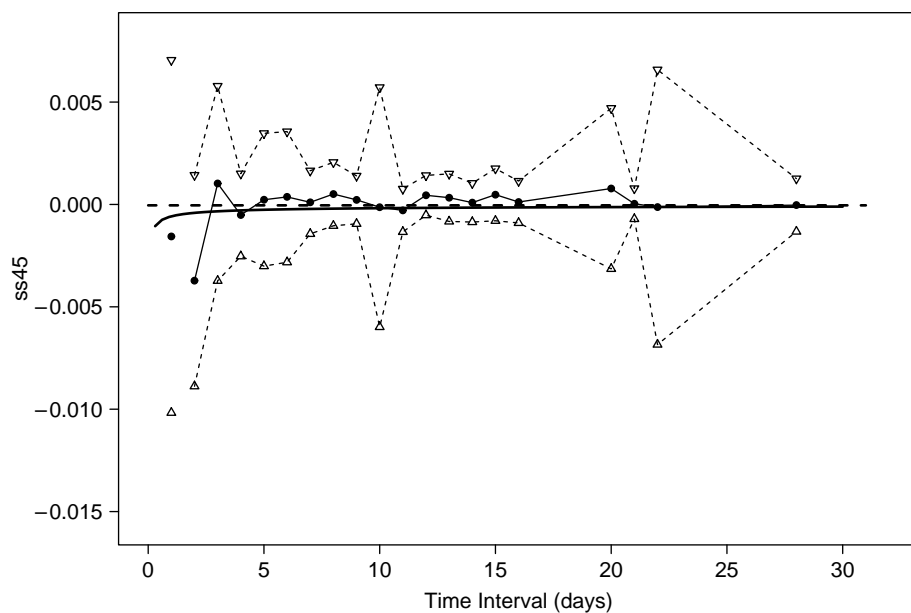

Figure S1.207. MLE of  $ss_{45}$  by Time Interval Compared to Overall Mean (0) for  $p = 6$  and  $f(t) = t$ .



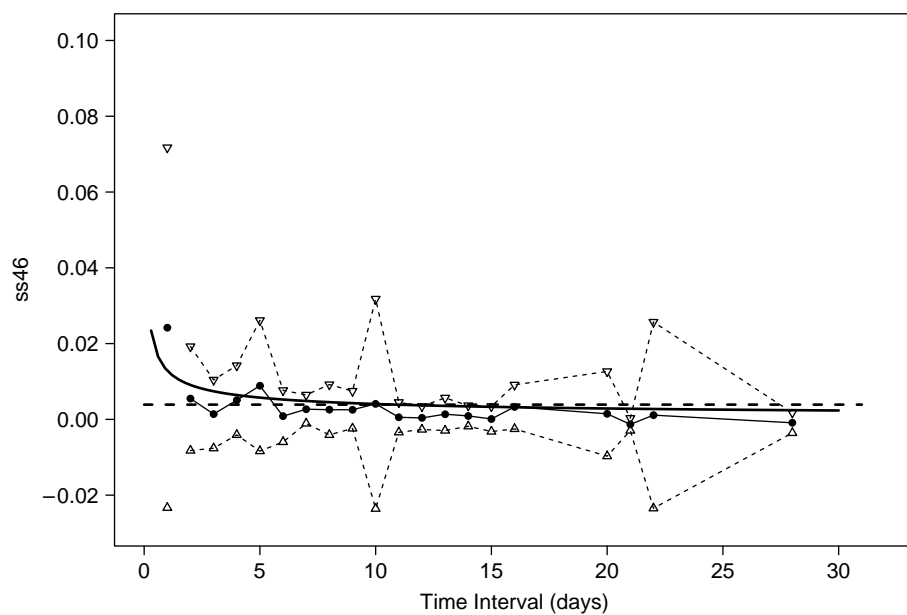

Figure S1.208. MLE of ss46 by Time Interval Compared to Overall Mean (0.0039) for  $p = 6$  and  $f(t) = t$ .

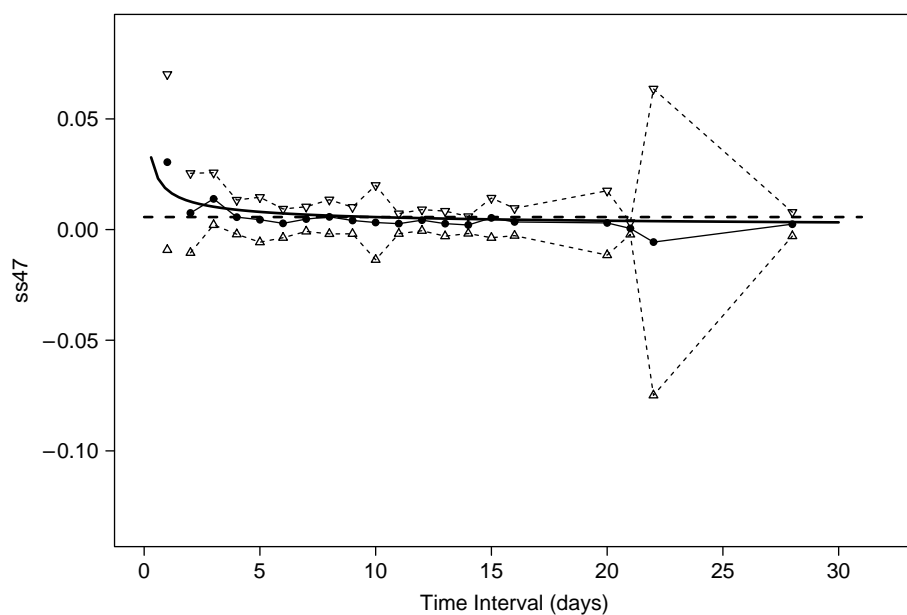

Figure S1.209. MLE of ss47 by Time Interval Compared to Overall Mean (0.0057) for  $p = 6$  and  $f(t) = t$ .

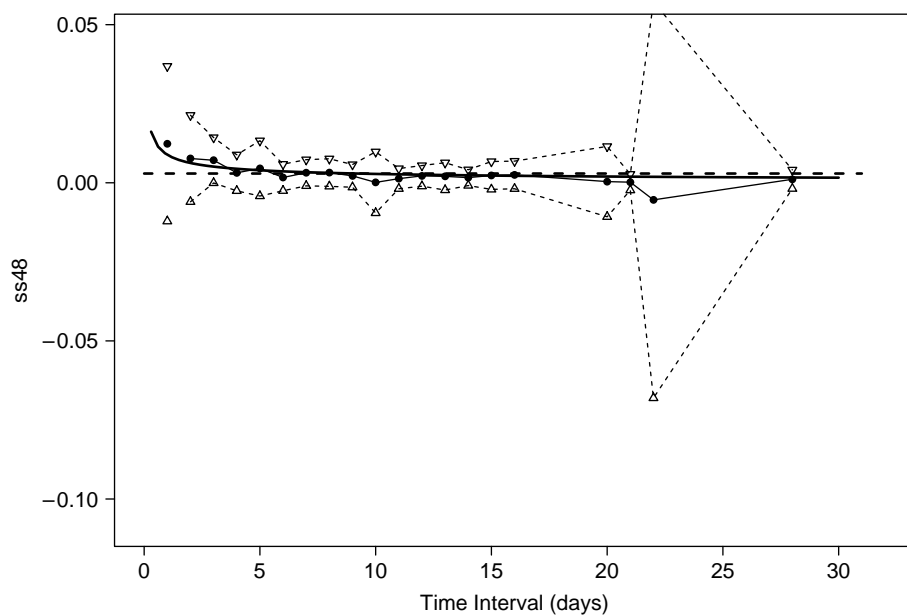

Figure S1.210. MLE of ss48 by Time Interval Compared to Overall Mean (0.0029) for  $p = 6$  and  $f(t) = t$ .

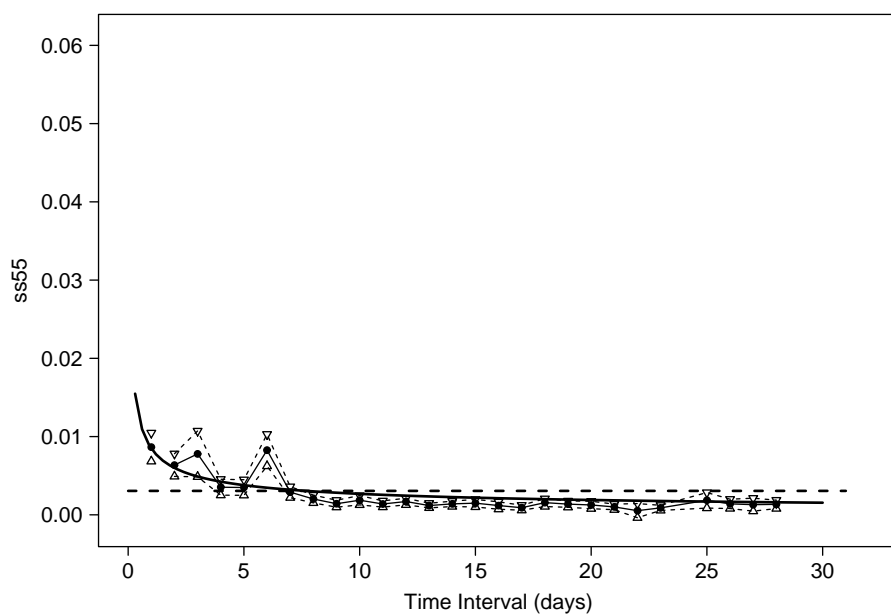

Figure S1.211. MLE of ss55 by Time Interval Compared to Overall Mean (0.0031) for  $p = 6$  and  $f(t) = t$ .

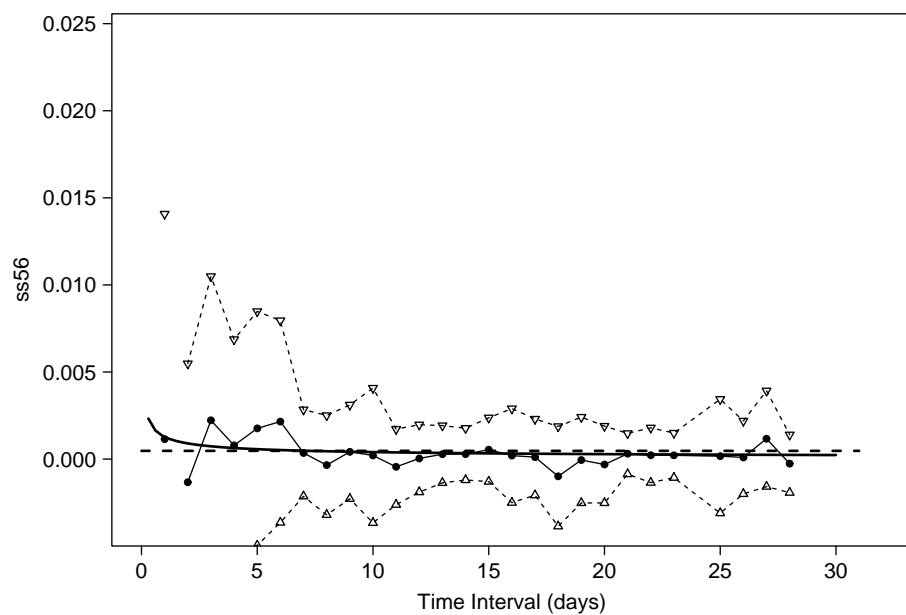

Figure S1.212. MLE of  $ss56$  by Time Interval Compared to Overall Mean ( $5e-04$ ) for  $p = 6$  and  $f(t) = t$ .

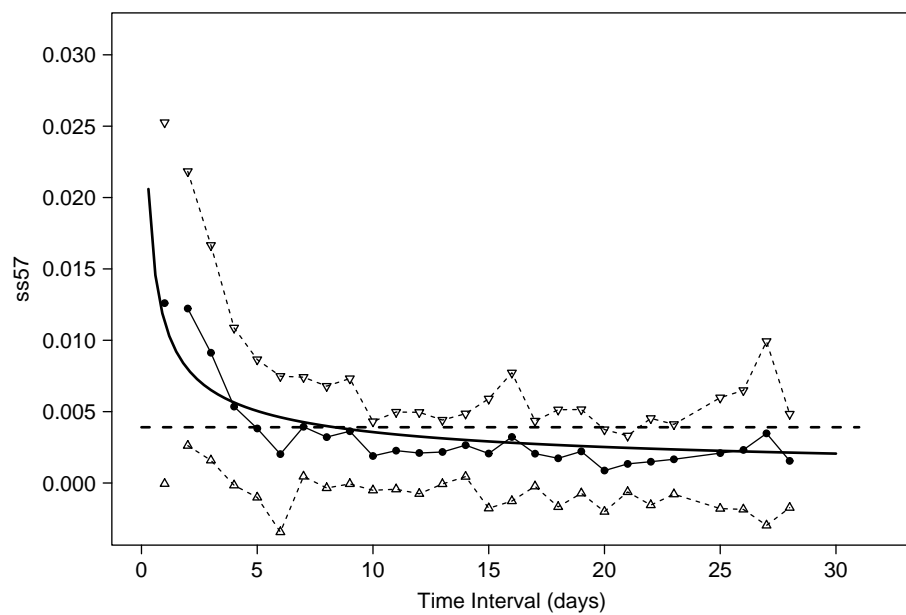

Figure S1.213. MLE of  $ss57$  by Time Interval Compared to Overall Mean ( $0.0039$ ) for  $p = 6$  and  $f(t) = t$ .

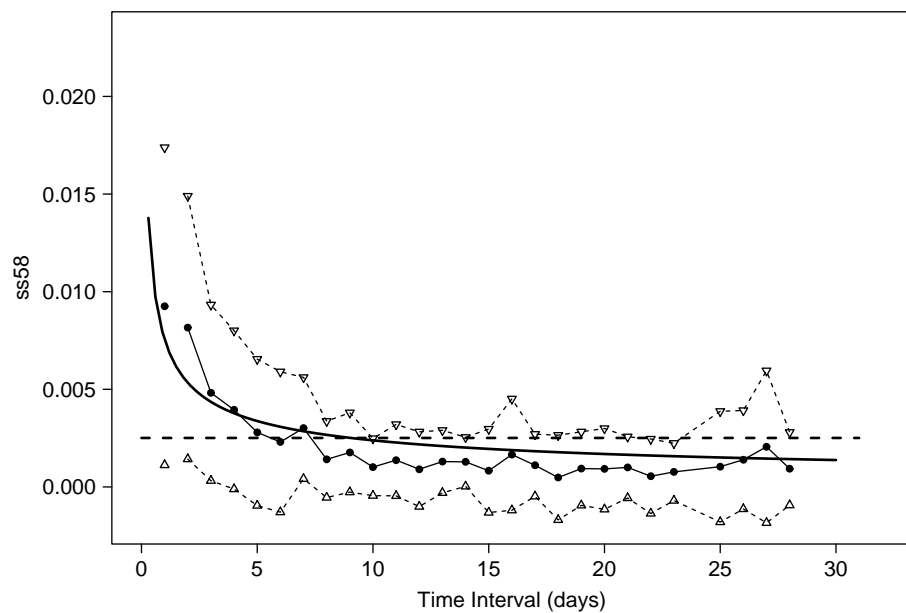

Figure S1.214. MLE of  $ss_{58}$  by Time Interval Compared to Overall Mean (0.0025) for  $p = 6$  and  $f(t) = t$ .

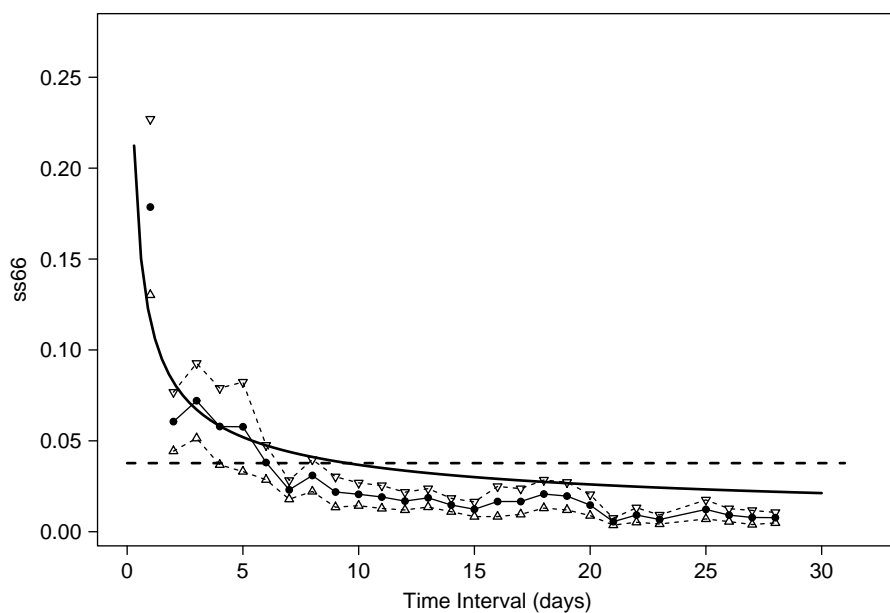

Figure S1.215. MLE of  $ss_{66}$  by Time Interval Compared to Overall Mean (0.0377) for  $p = 6$  and  $f(t) = t$ .

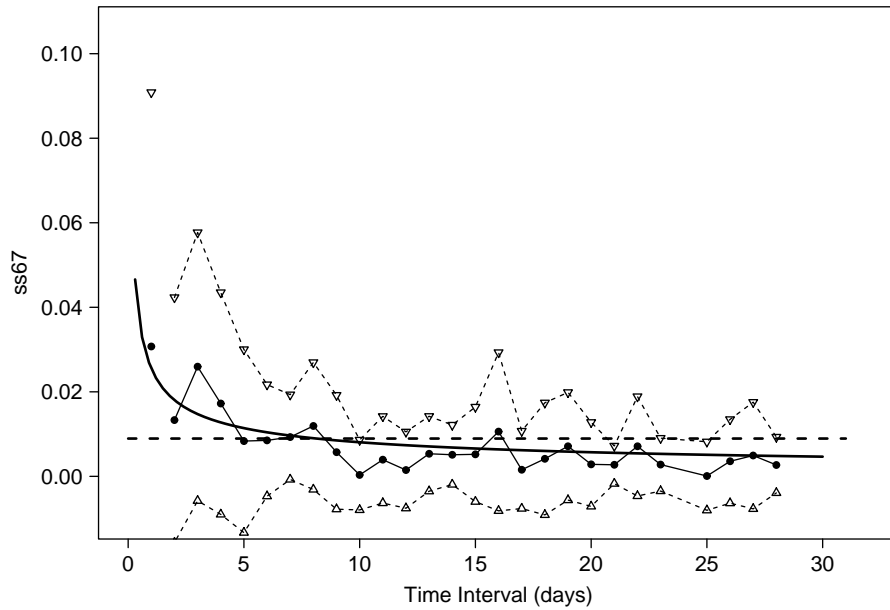

Figure S1.216. MLE of  $ss67$  by Time Interval Compared to Overall Mean (0.0089) for  $p = 6$  and  $f(t) = t$ .

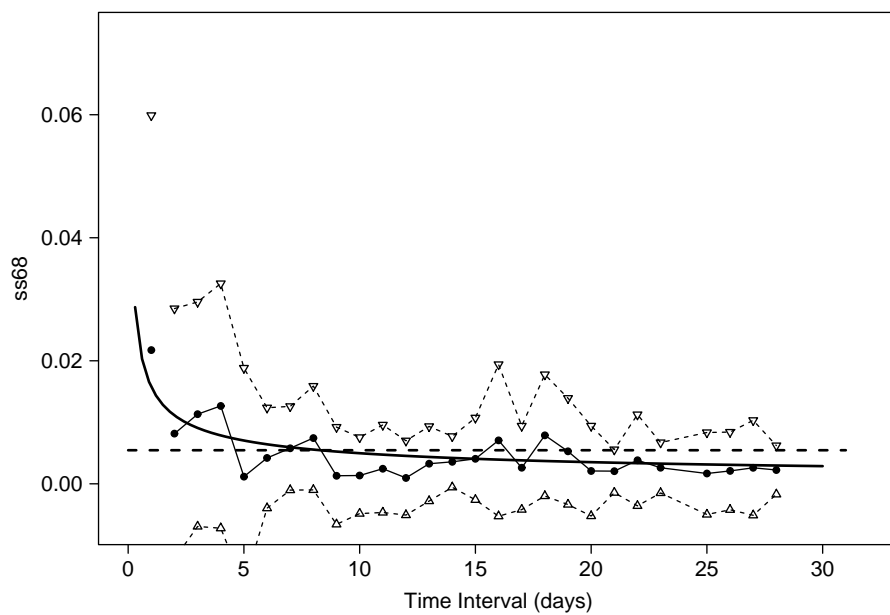

Figure S1.217. MLE of  $ss68$  by Time Interval Compared to Overall Mean (0.0055) for  $p = 6$  and  $f(t) = t$ .

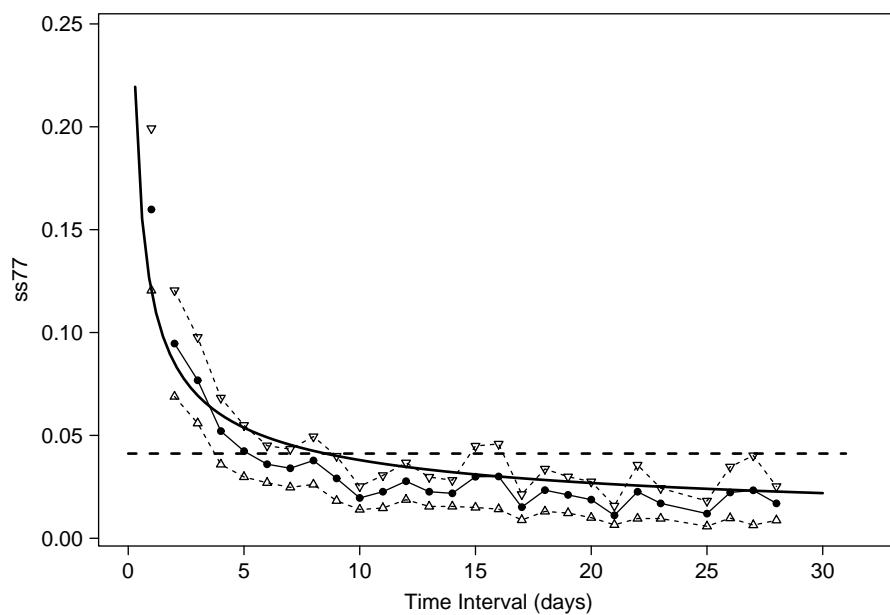

Figure S1.218. MLE of  $ss77$  by Time Interval Compared to Overall Mean (0.0412) for  $p = 6$  and  $f(t) = t$ .

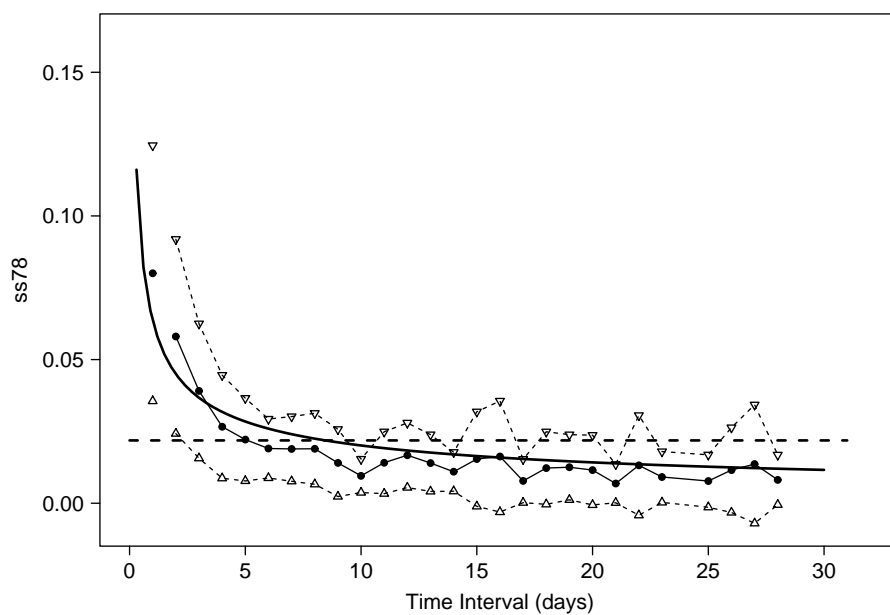

Figure S1.219. MLE of  $ss78$  by Time Interval Compared to Overall Mean (0.0219) for  $p = 6$  and  $f(t) = t$ .

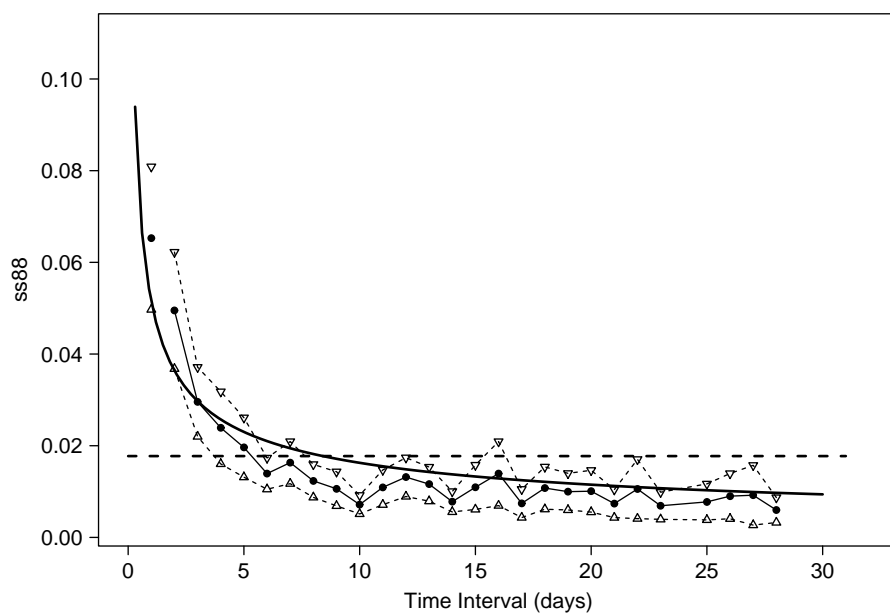

Figure S1.220. MLE of  $ss88$  by Time Interval Compared to Overall Mean (0.0177) for  $p = 6$  and  $f(t) = t$ .

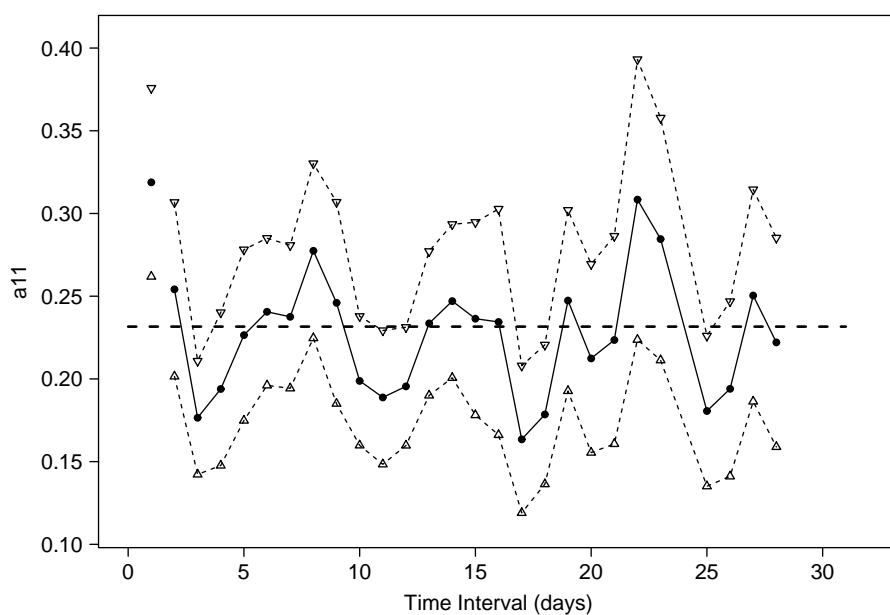

Figure S1.221. MLE of  $a11$  by Time Interval Compared to Overall Mean (0.2316) for  $p = 6$  and  $f(t) = t$ .

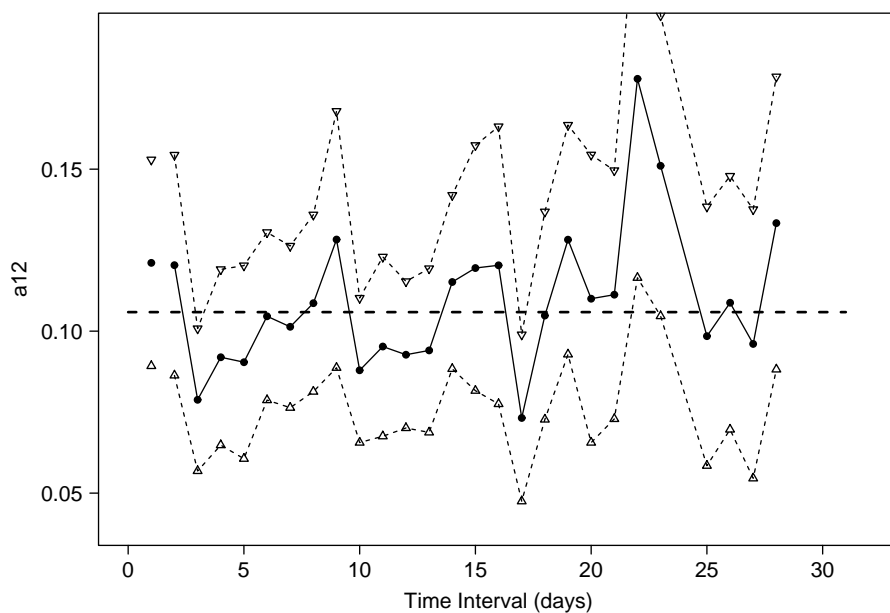

Figure S1.222. MLE of  $a_{12}$  by Time Interval Compared to Overall Mean (0.1059) for  $p = 6$  and  $f(t) = t$ .

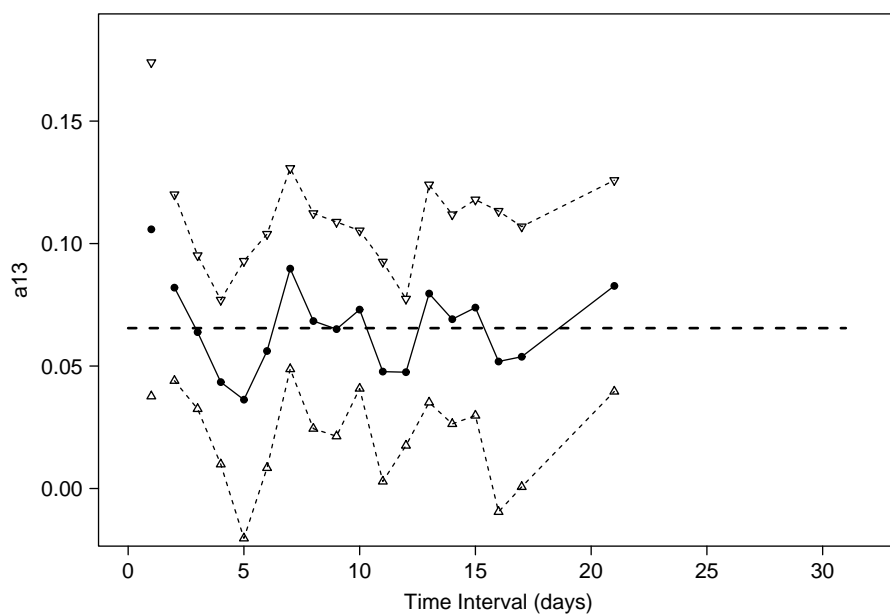

Figure S1.223. MLE of  $a_{13}$  by Time Interval Compared to Overall Mean (0.0655) for  $p = 6$  and  $f(t) = t$ .



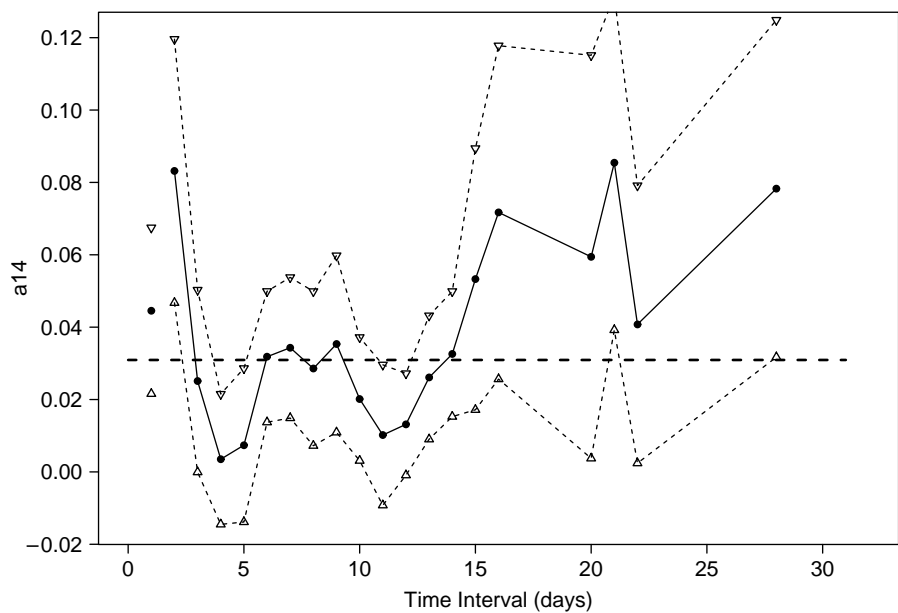

Figure S1.224. MLE of  $a_{14}$  by Time Interval Compared to Overall Mean (0.0309) for  $p = 6$  and  $f(t) = t$ .

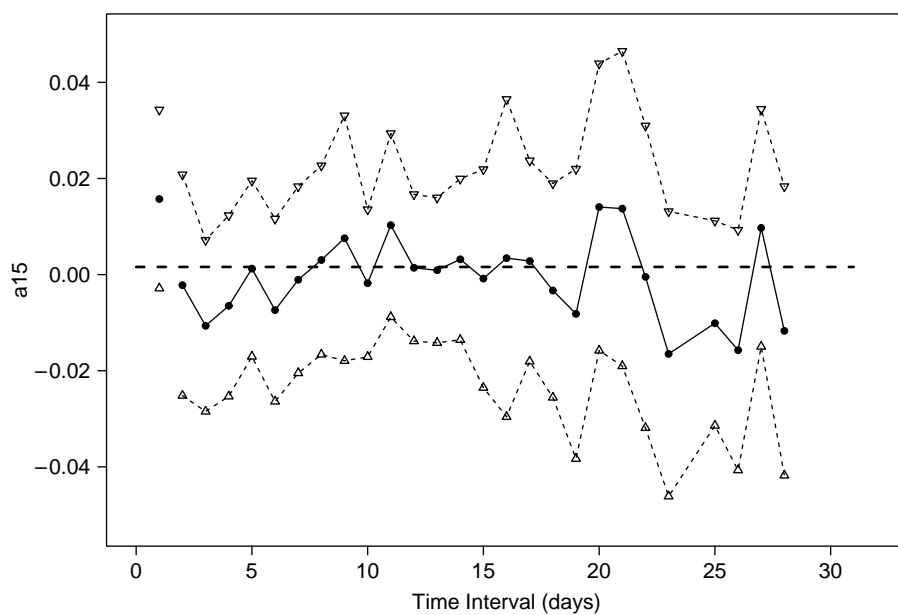

Figure S1.225. MLE of  $a_{15}$  by Time Interval Compared to Overall Mean (0.0016) for  $p = 6$  and  $f(t) = t$ .

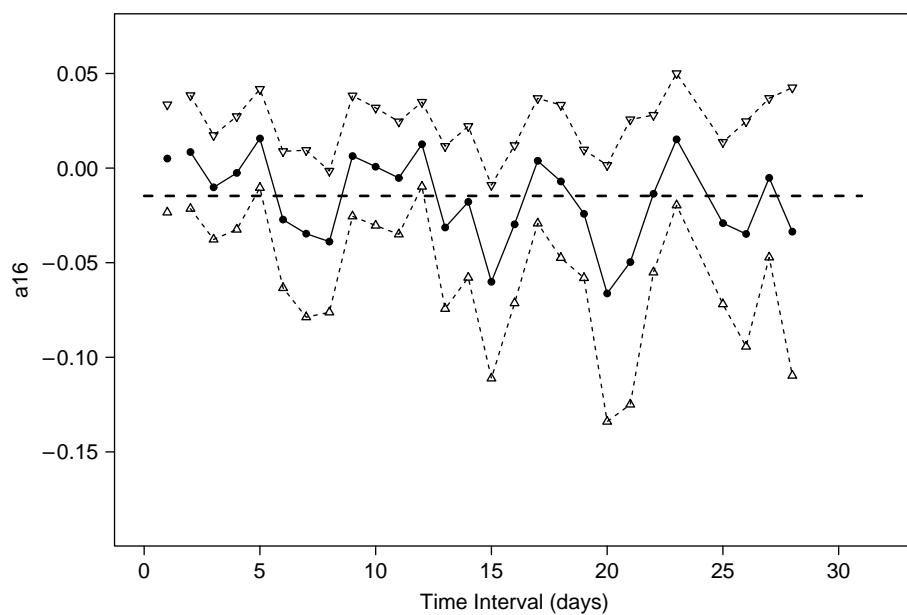

Figure S1.226. MLE of  $a_{16}$  by Time Interval Compared to Overall Mean ( $-0.0147$ ) for  $p = 6$  and  $f(t) = t$ .

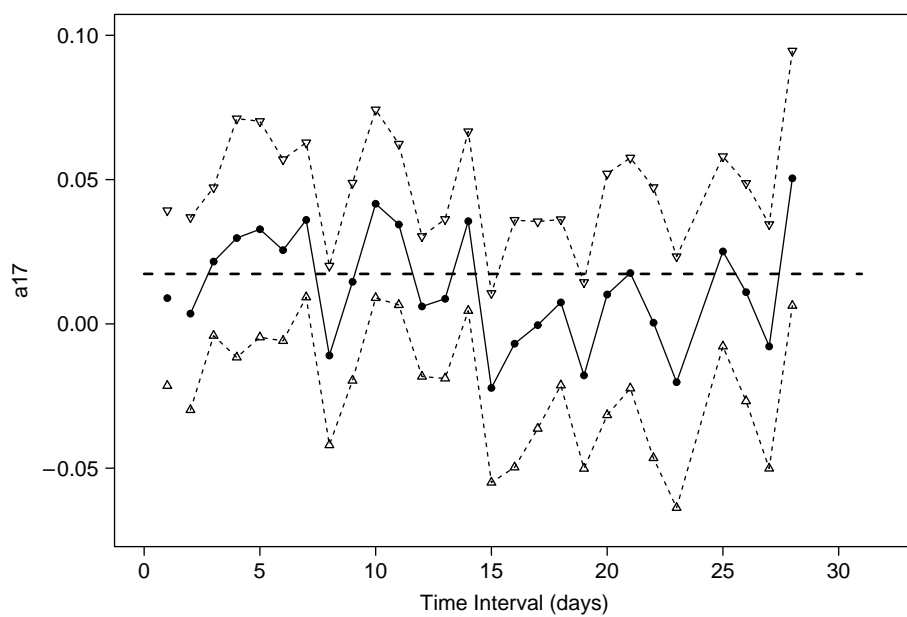

Figure S1.227. MLE of  $a_{17}$  by Time Interval Compared to Overall Mean ( $0.0173$ ) for  $p = 6$  and  $f(t) = t$ .

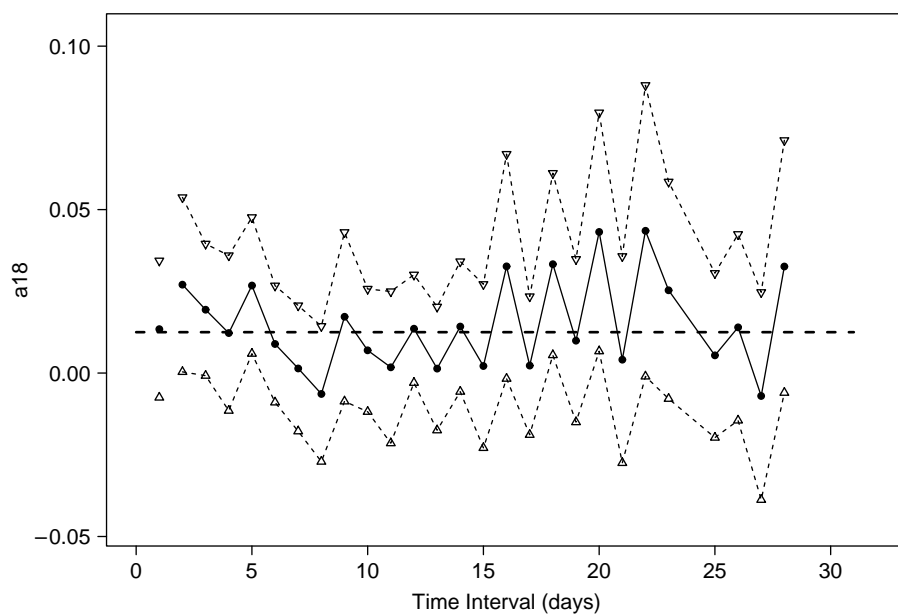

Figure S1.228. MLE of a18 by Time Interval Compared to Overall Mean (0.0125) for  $p = 6$  and  $f(t) = t$ .

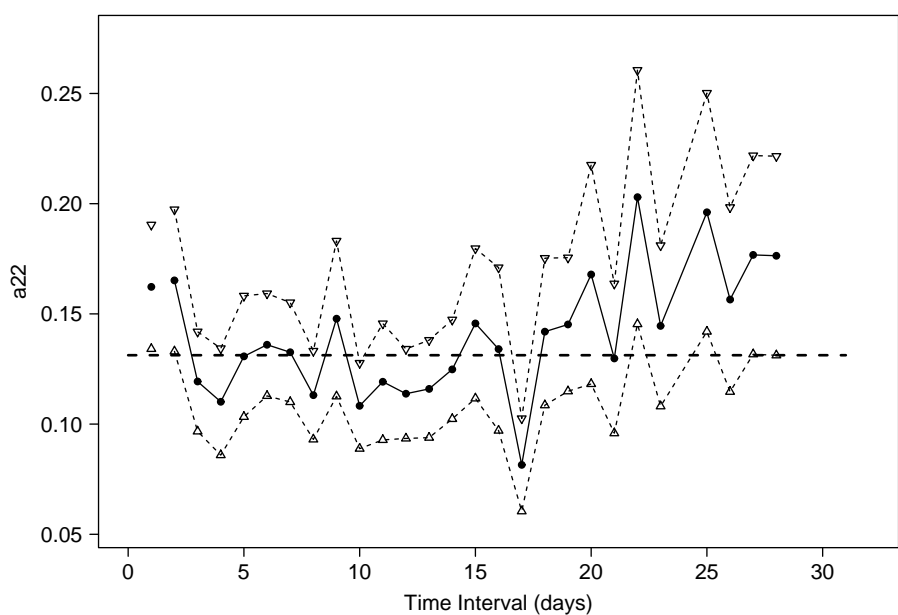

Figure S1.229. MLE of a22 by Time Interval Compared to Overall Mean (0.1313) for  $p = 6$  and  $f(t) = t$ .

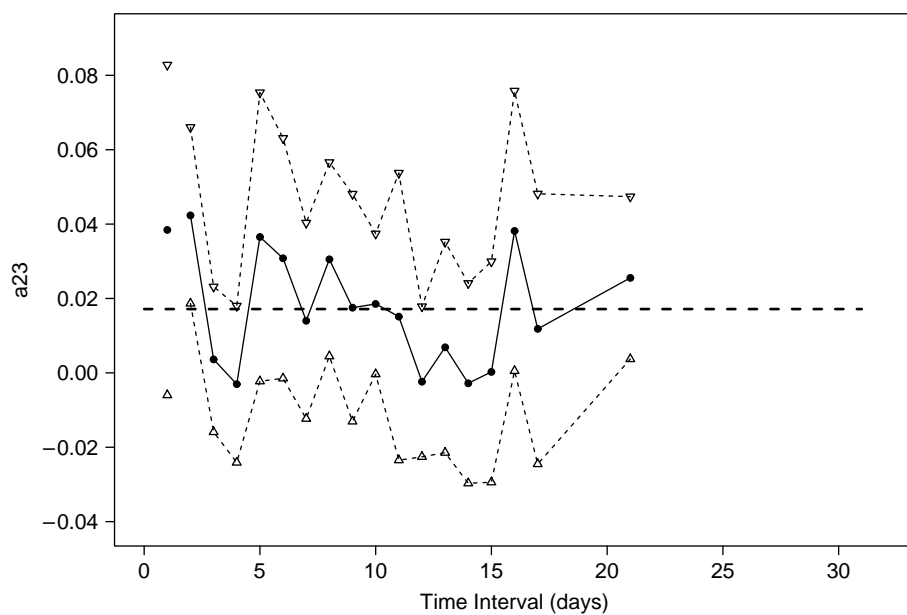

Figure S1.230. MLE of  $a_{23}$  by Time Interval Compared to Overall Mean (0.0172) for  $p = 6$  and  $f(t) = t$ .

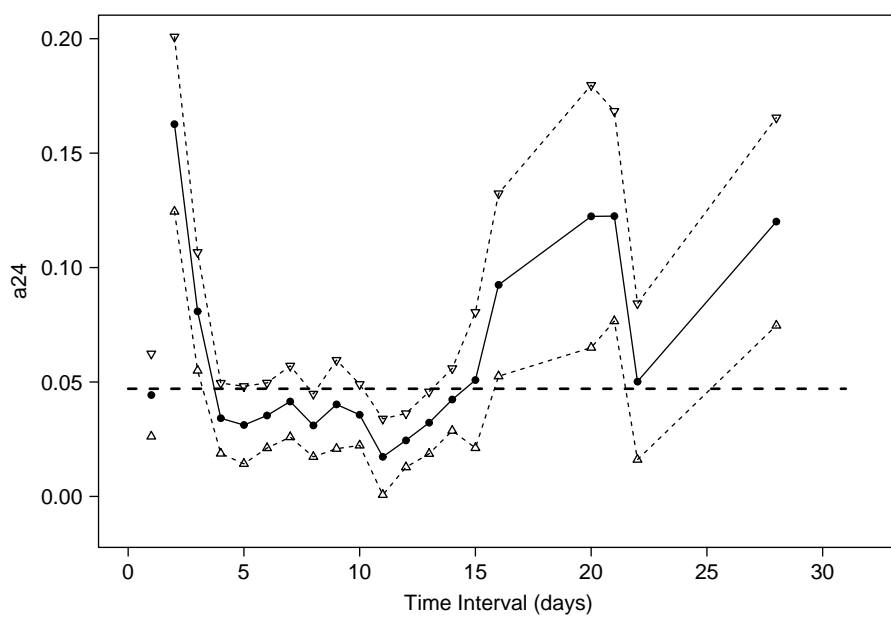

Figure S1.231. MLE of  $a_{24}$  by Time Interval Compared to Overall Mean (0.0471) for  $p = 6$  and  $f(t) = t$ .

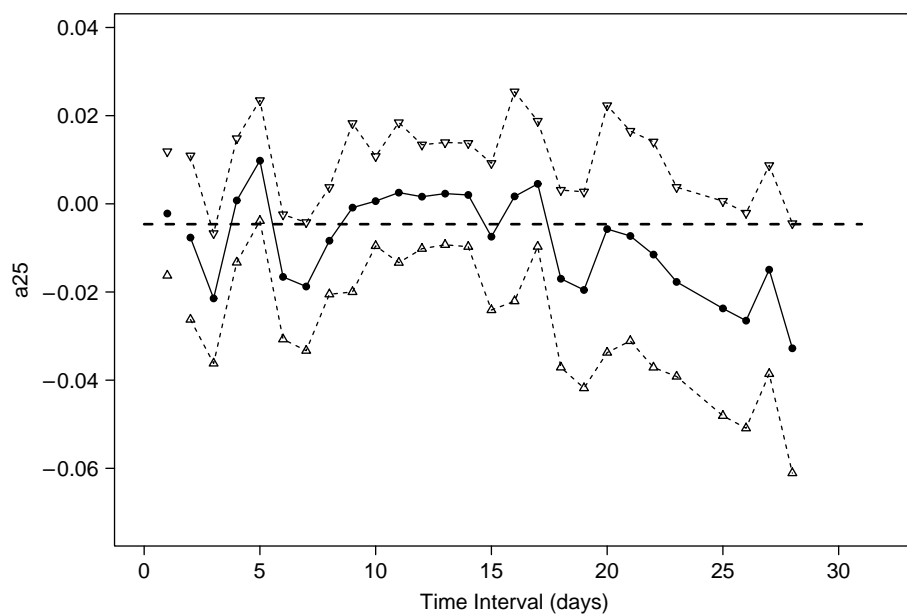

Figure S1.232. MLE of  $a_{25}$  by Time Interval Compared to Overall Mean ( $-0.0046$ ) for  $p = 6$  and  $f(t) = t$ .

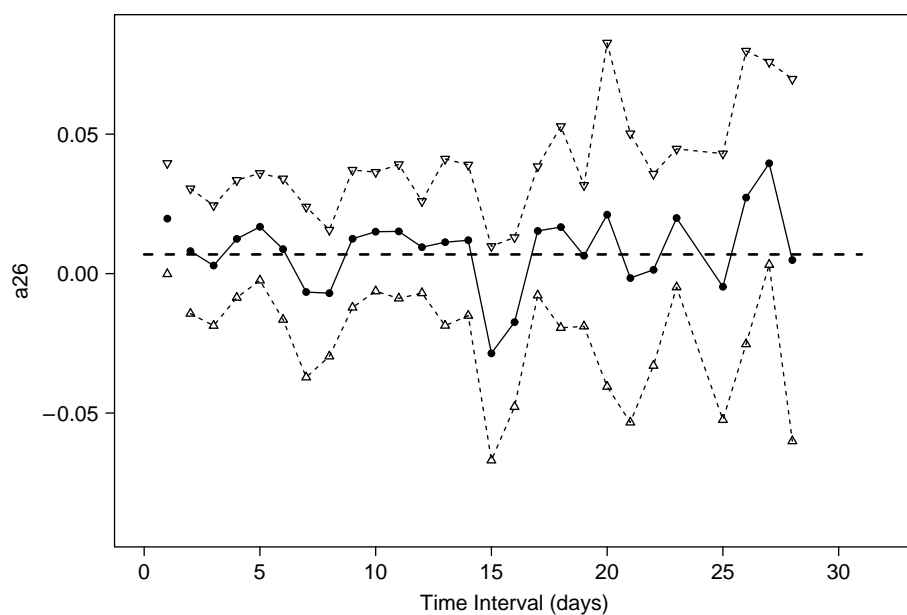

Figure S1.233. MLE of  $a_{26}$  by Time Interval Compared to Overall Mean ( $0.0069$ ) for  $p = 6$  and  $f(t) = t$ .

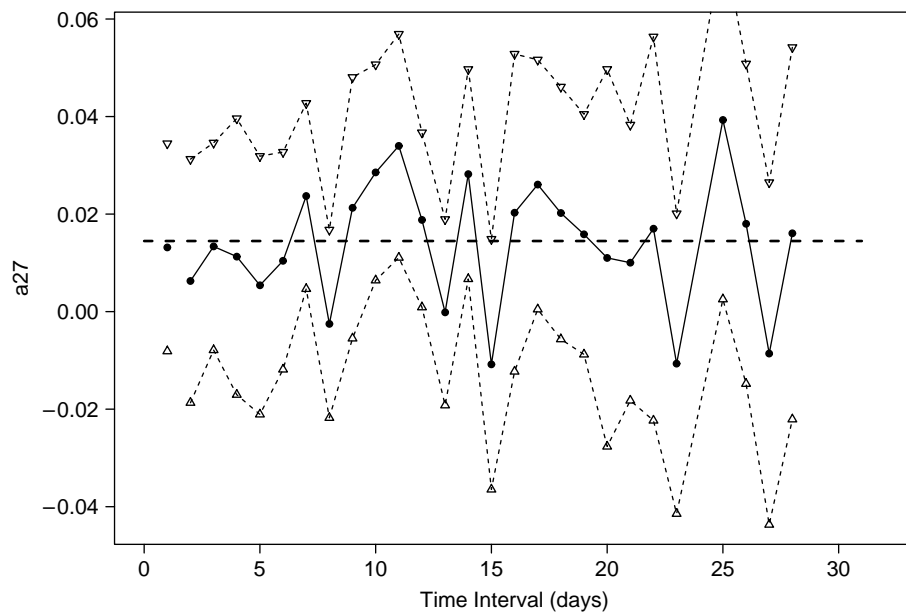

Figure S1.234. MLE of  $a_{27}$  by Time Interval Compared to Overall Mean (0.0145) for  $p = 6$  and  $f(t) = t$ .

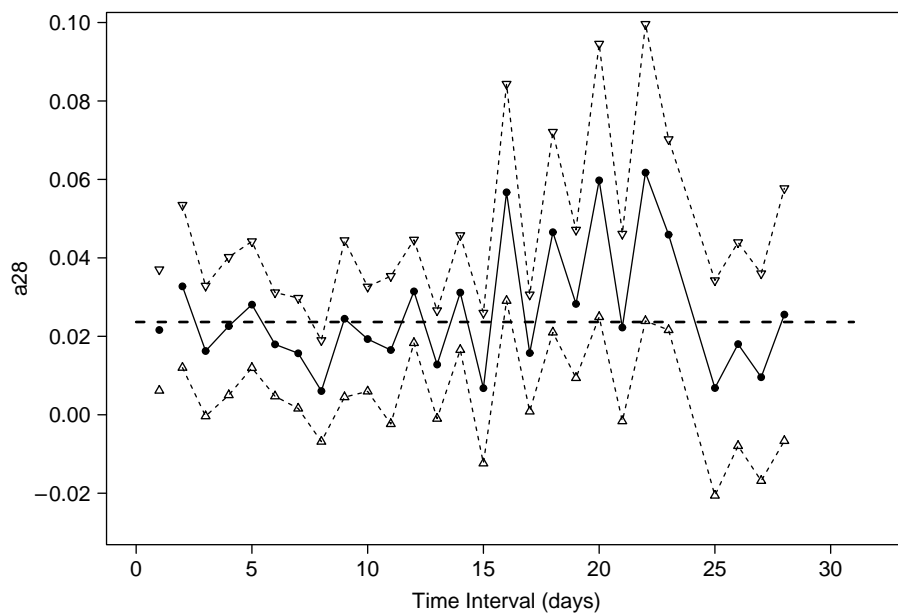

Figure S1.235. MLE of  $a_{28}$  by Time Interval Compared to Overall Mean (0.0237) for  $p = 6$  and  $f(t) = t$ .

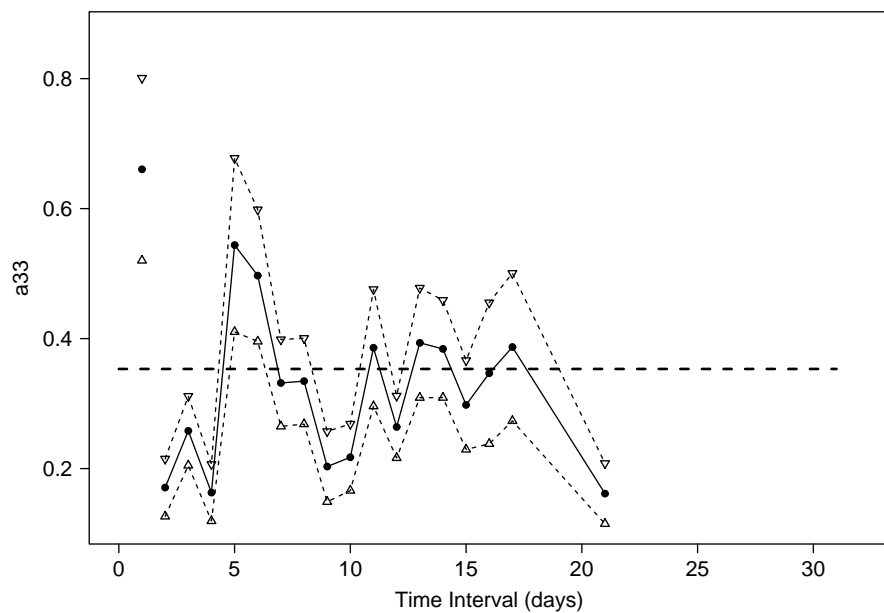

Figure S1.236. MLE of  $a_{33}$  by Time Interval Compared to Overall Mean (0.3533) for  $p = 6$  and  $f(t) = t$ .

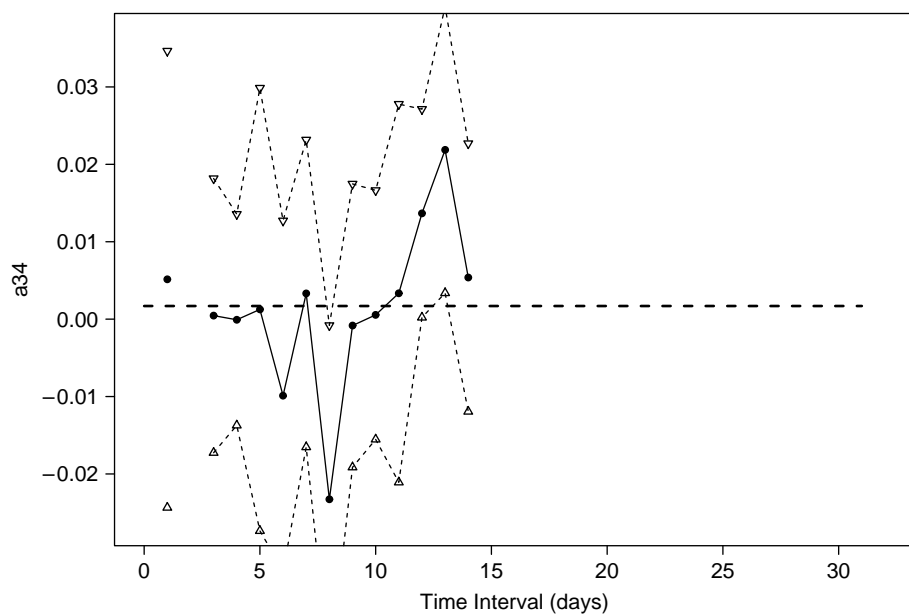

Figure S1.237. MLE of  $a_{34}$  by Time Interval Compared to Overall Mean (0.0017) for  $p = 6$  and  $f(t) = t$ .

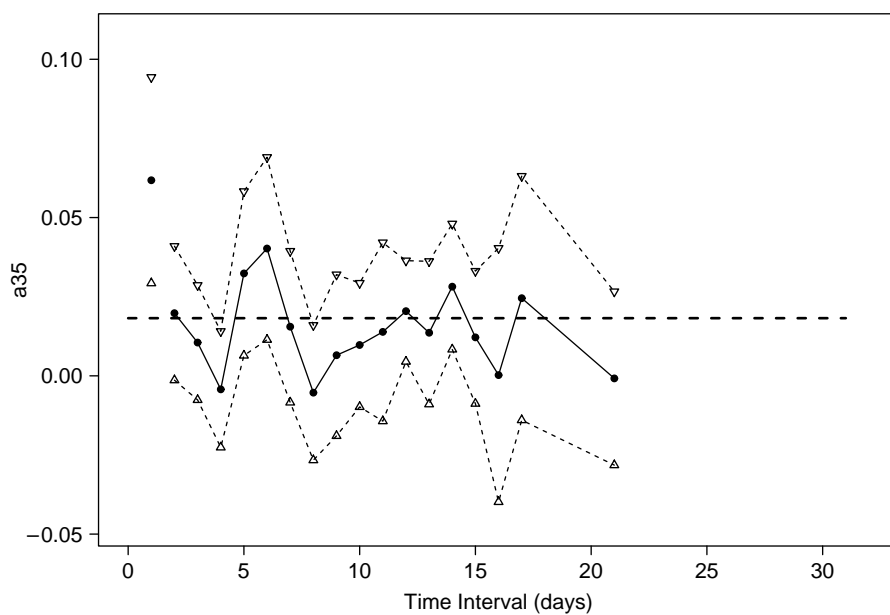

Figure S1.238. MLE of  $a_{35}$  by Time Interval Compared to Overall Mean (0.0182) for  $p = 6$  and  $f(t) = t$ .

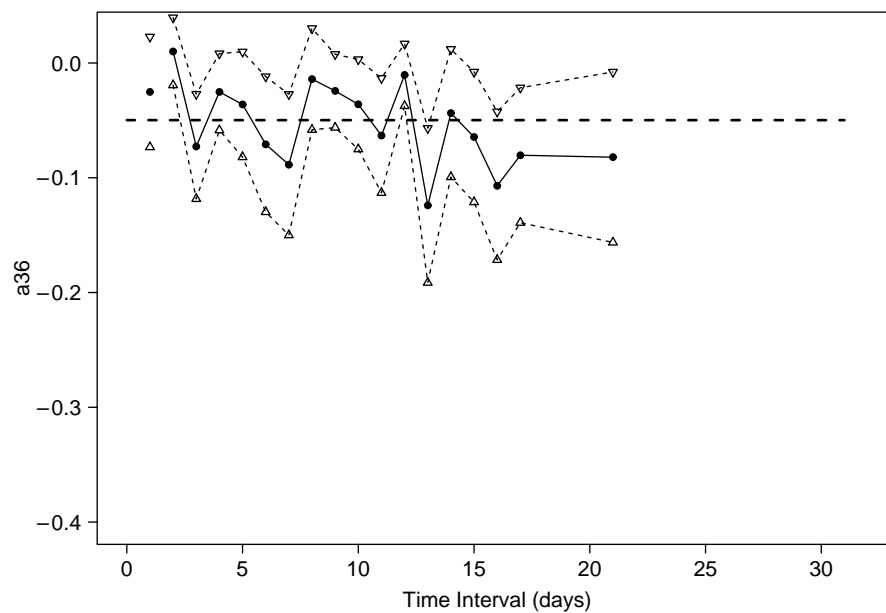

Figure S1.239. MLE of  $a_{36}$  by Time Interval Compared to Overall Mean (-0.0498) for  $p = 6$  and  $f(t) = t$ .



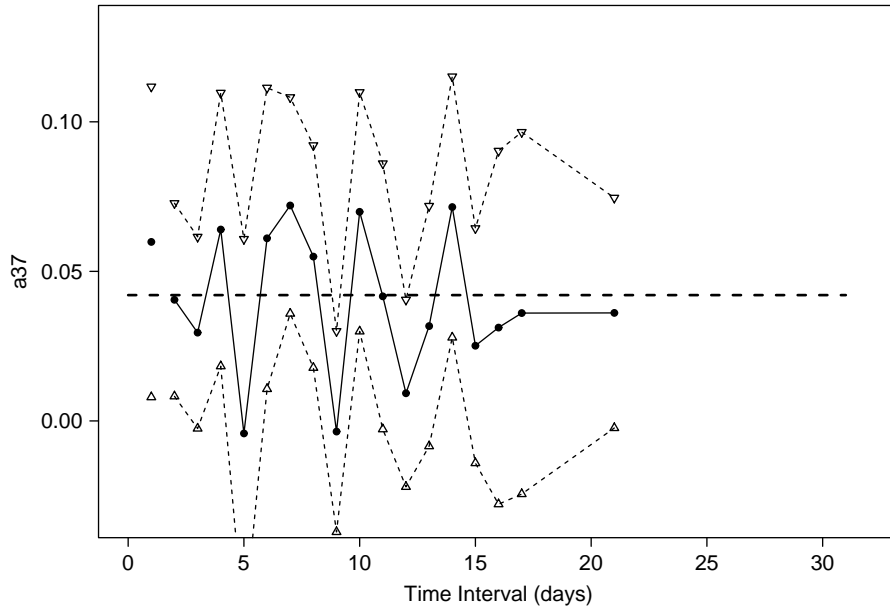

Figure S1.240. MLE of  $a_{37}$  by Time Interval Compared to Overall Mean (0.0421) for  $p = 6$  and  $f(t) = t$ .

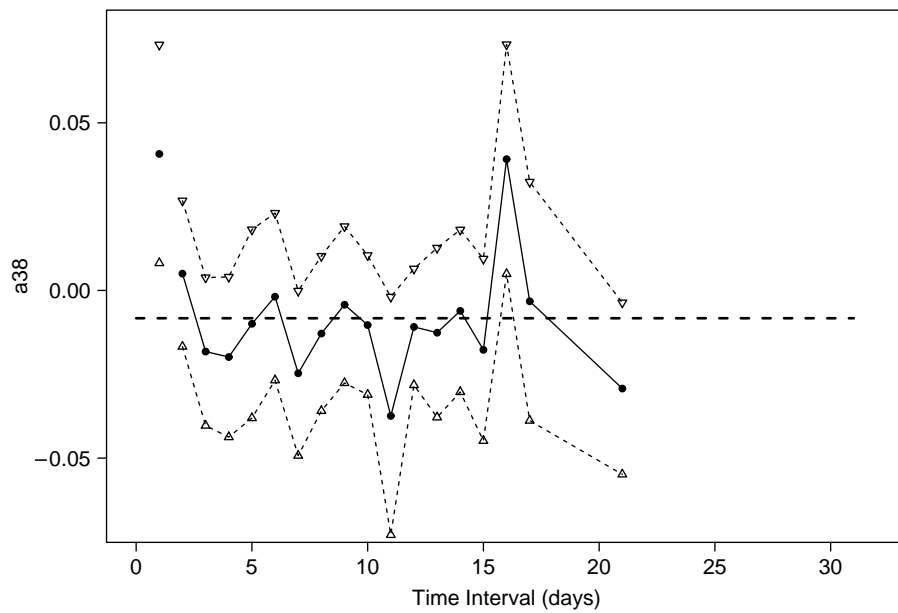

Figure S1.241. MLE of  $a_{38}$  by Time Interval Compared to Overall Mean (-0.0083) for  $p = 6$  and  $f(t) = t$ .

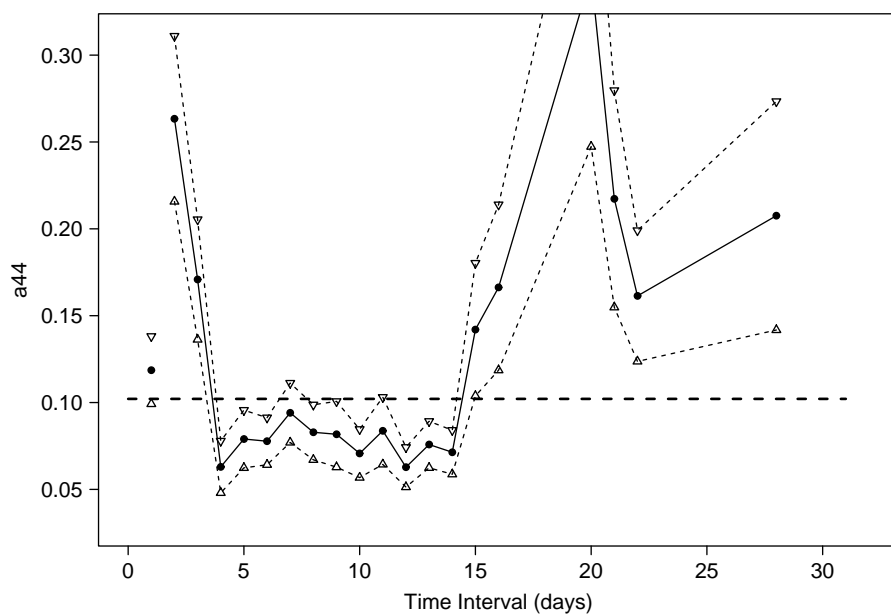

Figure S1.242. MLE of  $a_{44}$  by Time Interval Compared to Overall Mean (0.1021) for  $p = 6$  and  $f(t) = t$ .

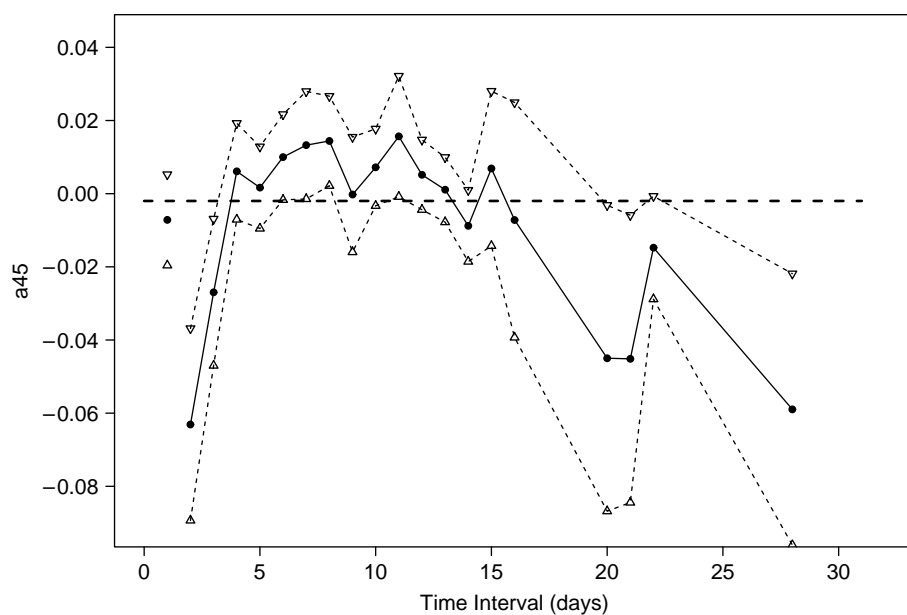

Figure S1.243. MLE of  $a_{45}$  by Time Interval Compared to Overall Mean (-0.002) for  $p = 6$  and  $f(t) = t$ .

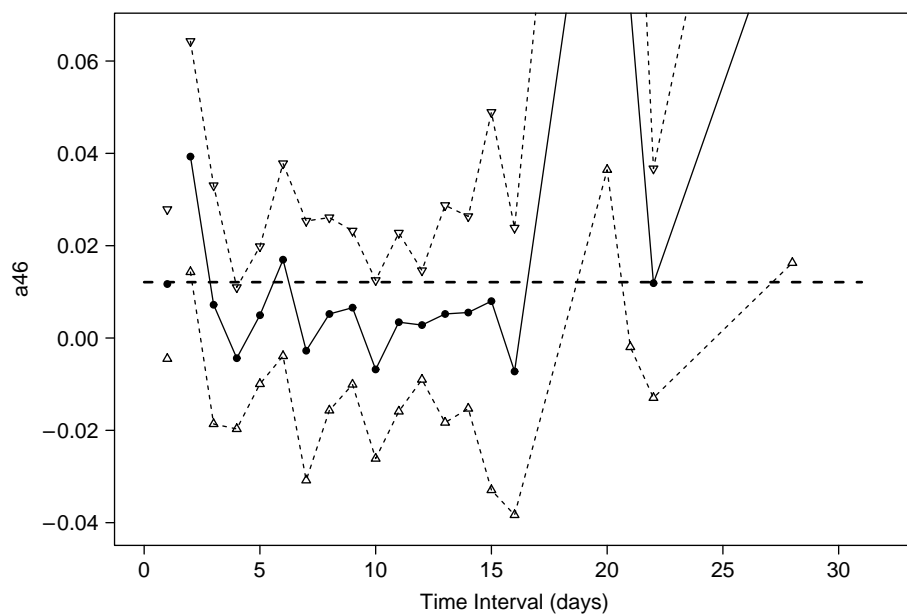

Figure S1.244. MLE of  $a_{46}$  by Time Interval Compared to Overall Mean (0.0121) for  $p = 6$  and  $f(t) = t$ .

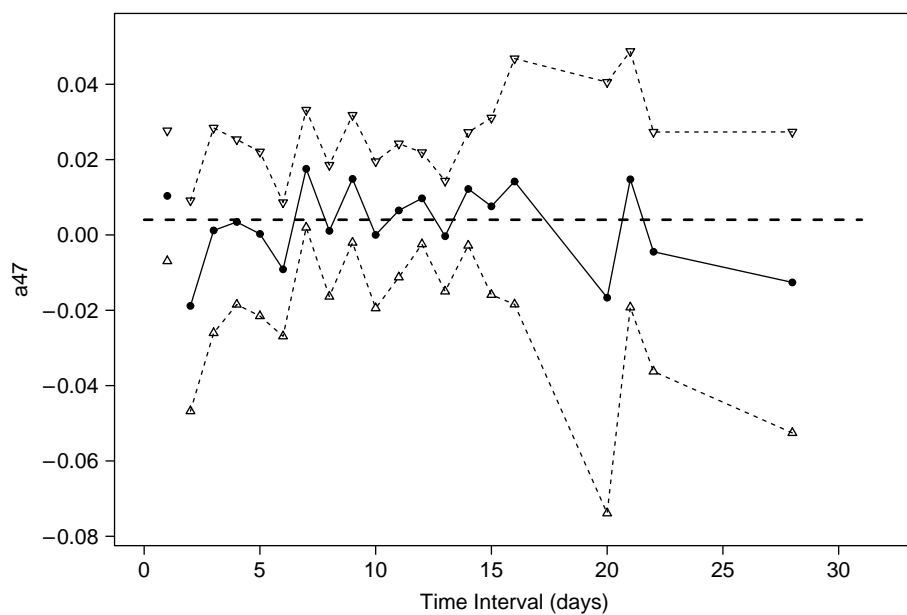

Figure S1.245. MLE of  $a_{47}$  by Time Interval Compared to Overall Mean (0.004) for  $p = 6$  and  $f(t) = t$ .

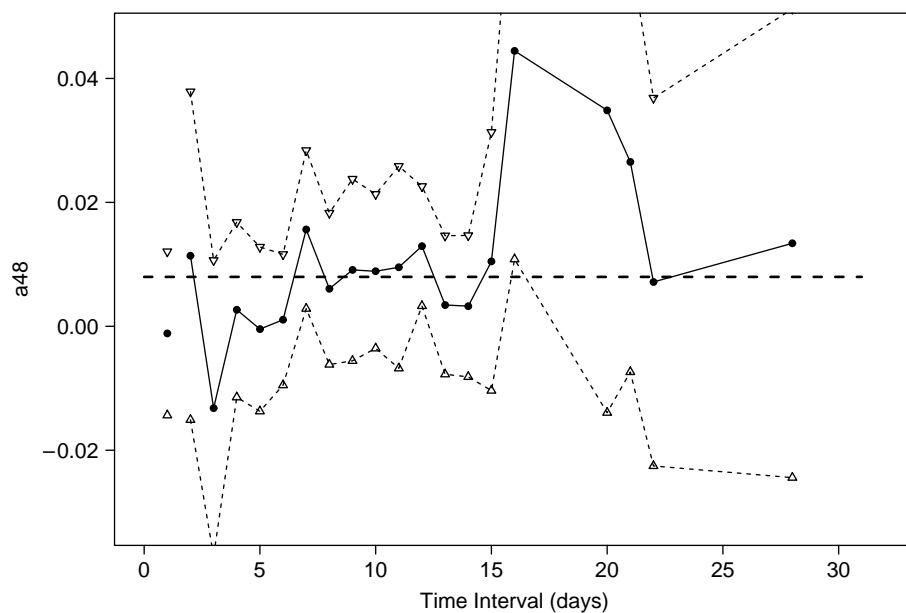

Figure S1.246. MLE of  $a_{48}$  by Time Interval Compared to Overall Mean (0.008) for  $p = 6$  and  $f(t) = t$ .

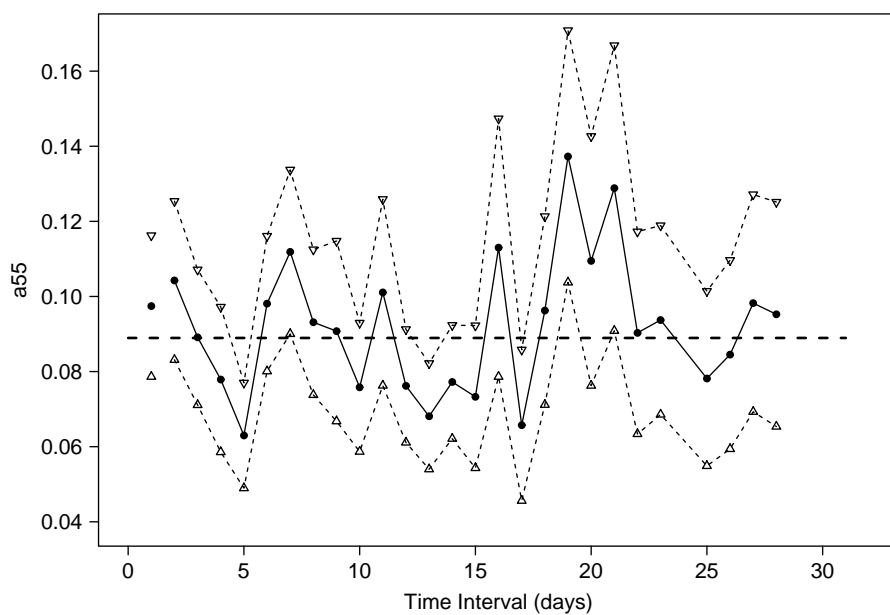

Figure S1.247. MLE of  $a_{55}$  by Time Interval Compared to Overall Mean (0.0889) for  $p = 6$  and  $f(t) = t$ .

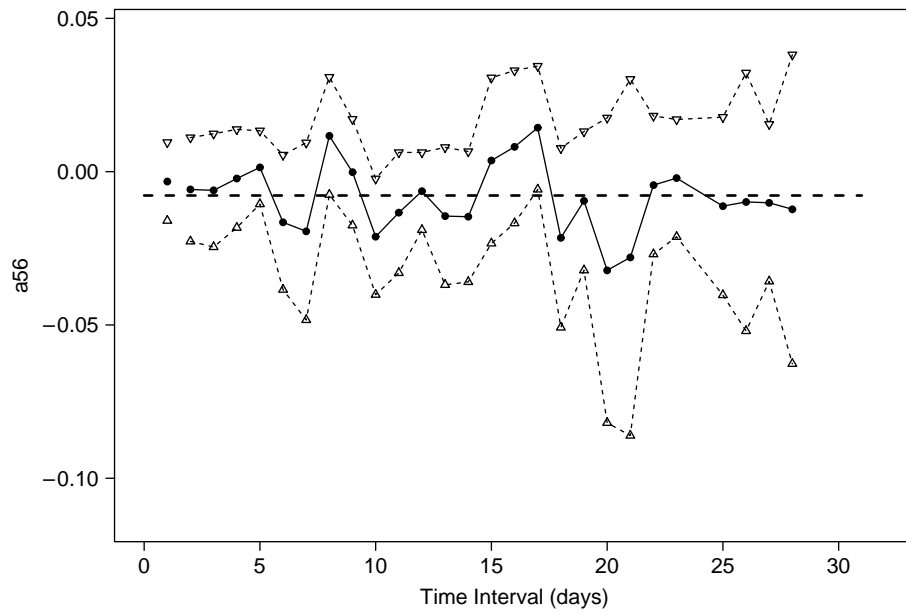

Figure S1.248. MLE of  $a_{56}$  by Time Interval Compared to Overall Mean ( $-0.0078$ ) for  $p = 6$  and  $f(t) = t$ .

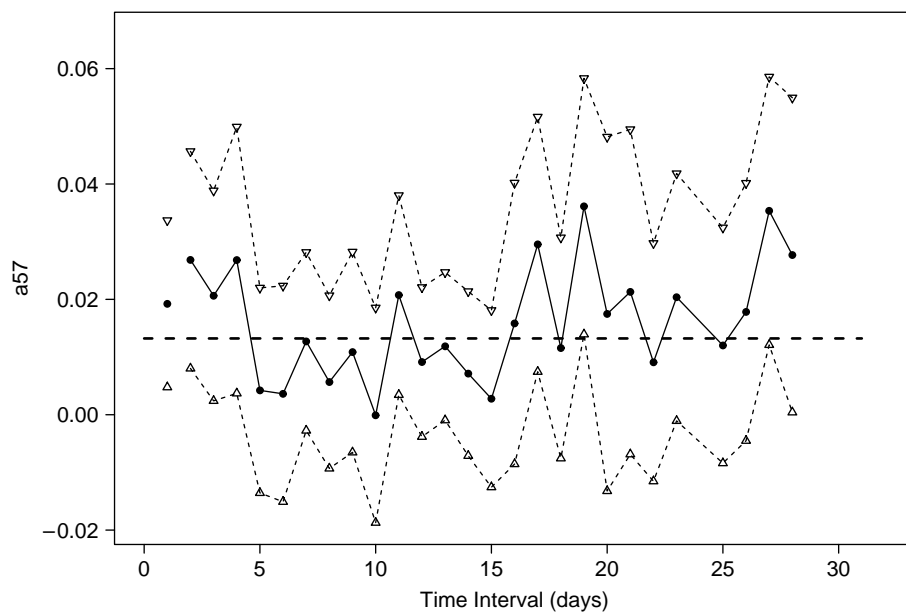

Figure S1.249. MLE of  $a_{57}$  by Time Interval Compared to Overall Mean ( $0.0132$ ) for  $p = 6$  and  $f(t) = t$ .

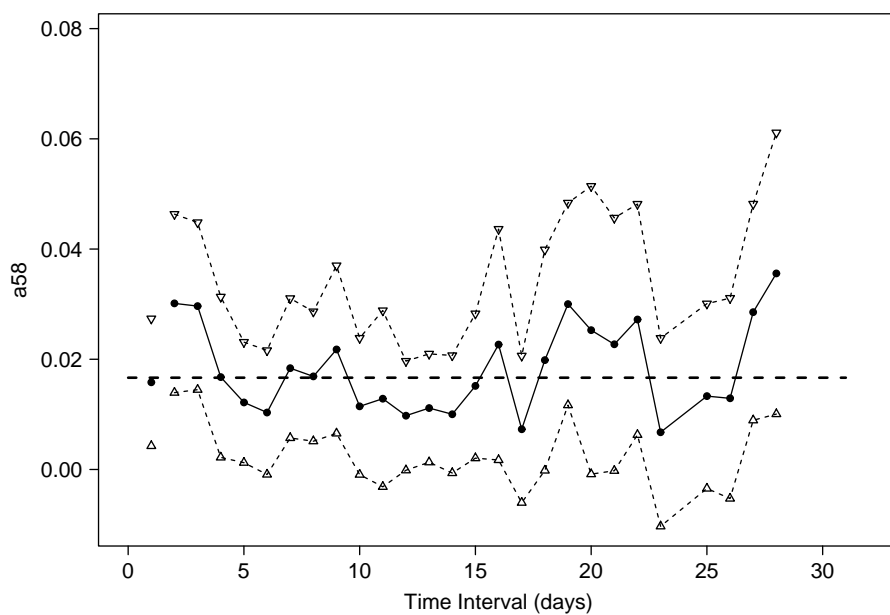

Figure S1.250. MLE of  $a_{58}$  by Time Interval Compared to Overall Mean (0.0167) for  $p = 6$  and  $f(t) = t$ .

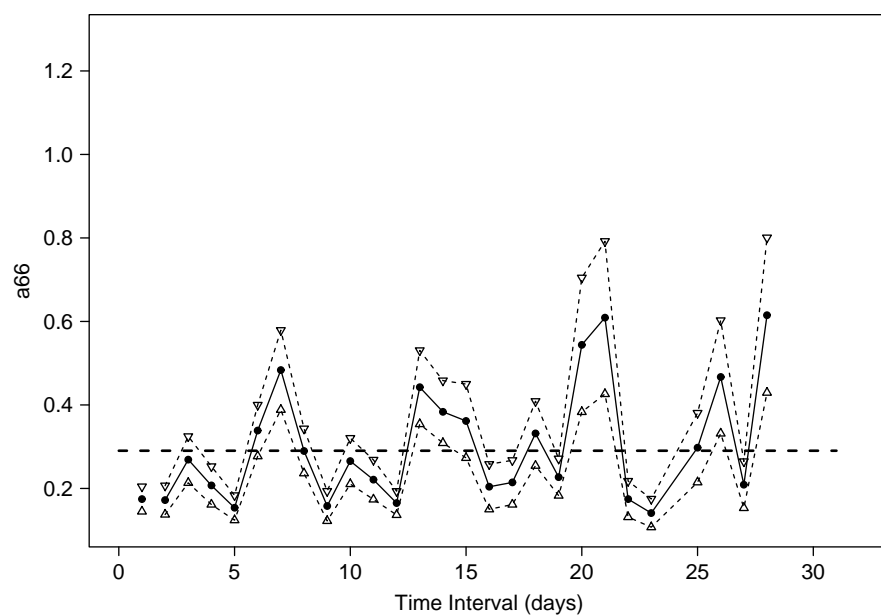

Figure S1.251. MLE of  $a_{66}$  by Time Interval Compared to Overall Mean (0.2903) for  $p = 6$  and  $f(t) = t$ .

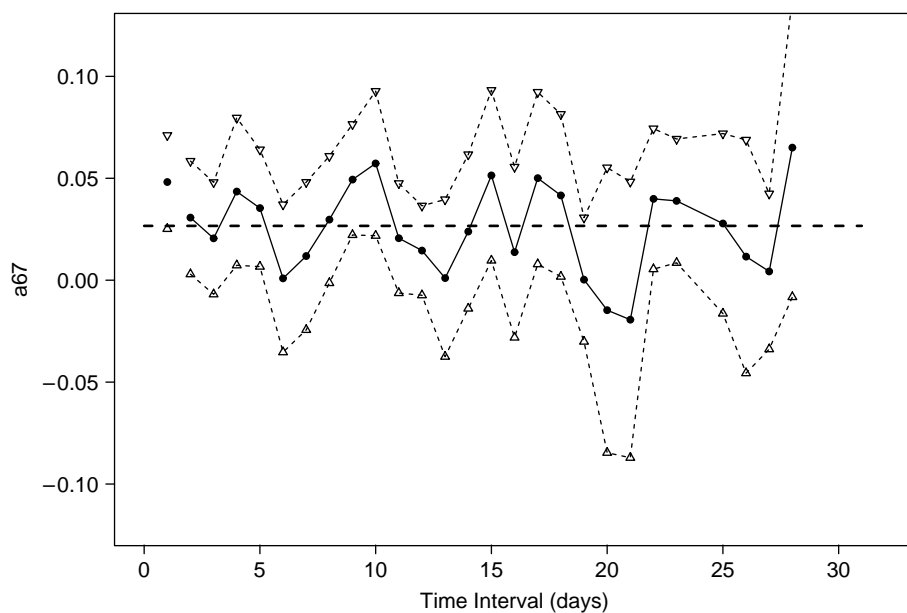

Figure S1.252. MLE of  $a_{67}$  by Time Interval Compared to Overall Mean (0.0266) for  $p = 6$  and  $f(t) = t$ .

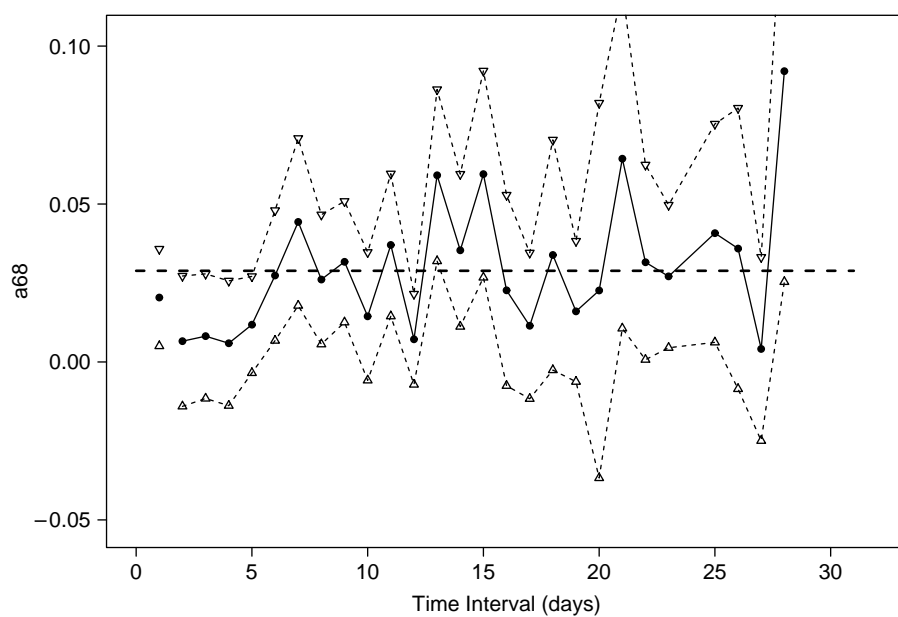

Figure S1.253. MLE of  $a_{68}$  by Time Interval Compared to Overall Mean (0.0289) for  $p = 6$  and  $f(t) = t$ .

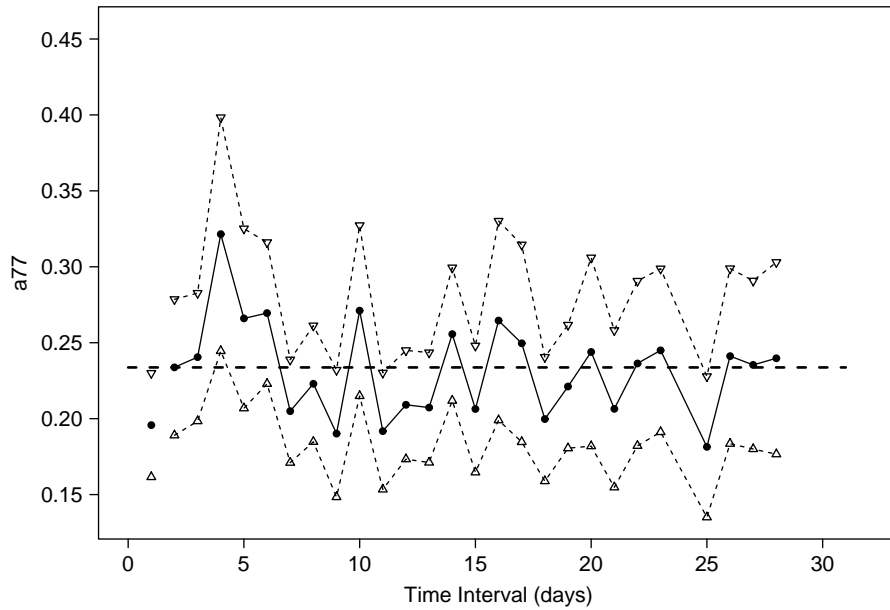

Figure S1.254. MLE of  $a_{77}$  by Time Interval Compared to Overall Mean (0.2337) for  $p = 6$  and  $f(t) = t$ .

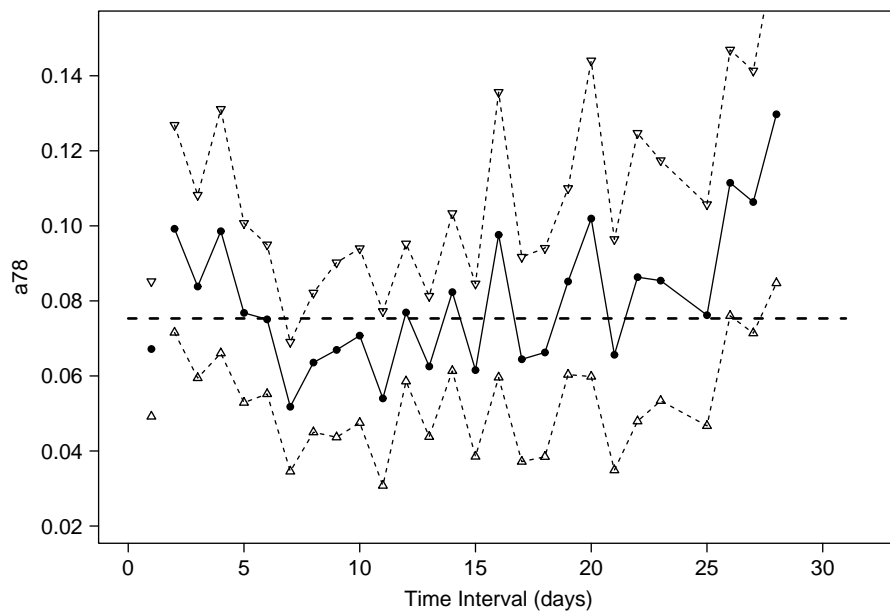

Figure S1.255. MLE of  $a_{78}$  by Time Interval Compared to Overall Mean (0.0753) for  $p = 6$  and  $f(t) = t$ .



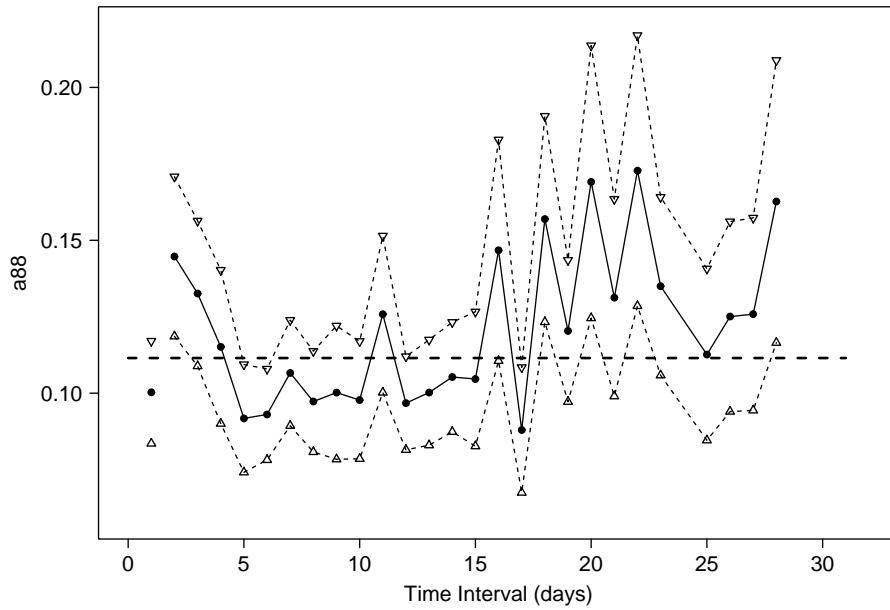

Figure S1.256. MLE of  $a_{88}$  by Time Interval Compared to Overall Mean (0.1115) for  $p = 6$  and  $f(t) = t$ .

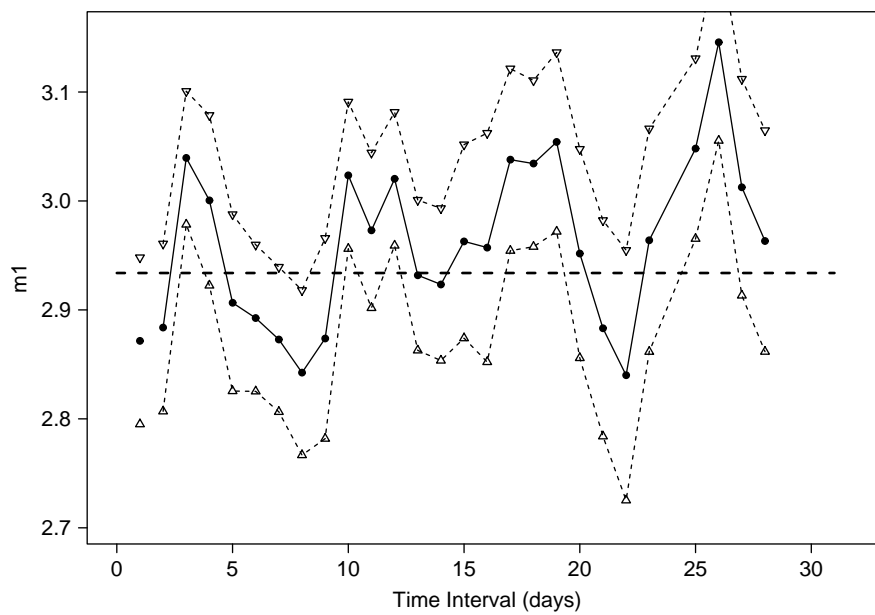

Figure S1.257. MLE of  $m_1$  by Time Interval Compared to Overall Mean (2.9339) for  $p = 6$  and  $f(t) = t$ .

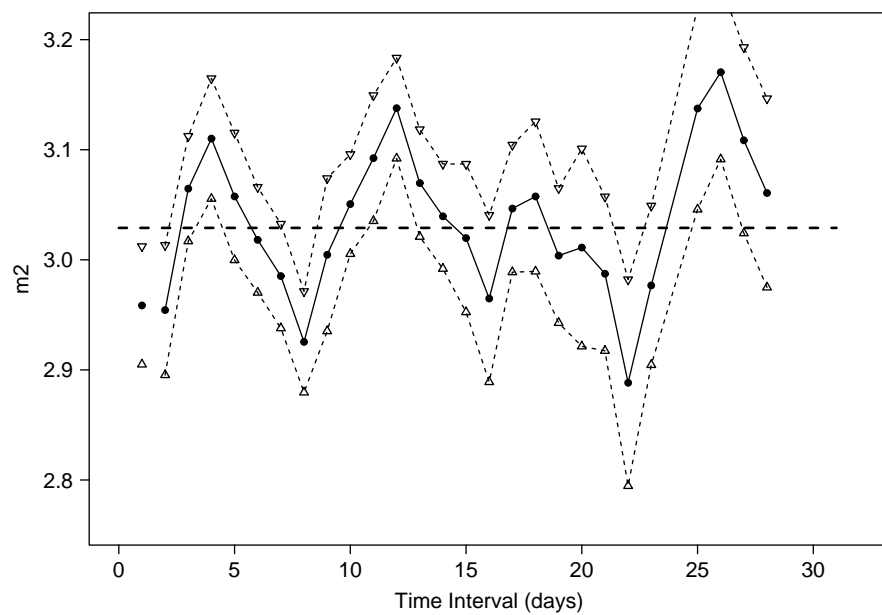

Figure S1.258. MLE of  $m_2$  by Time Interval Compared to Overall Mean (3.029) for  $p = 6$  and  $f(t) = t$ .

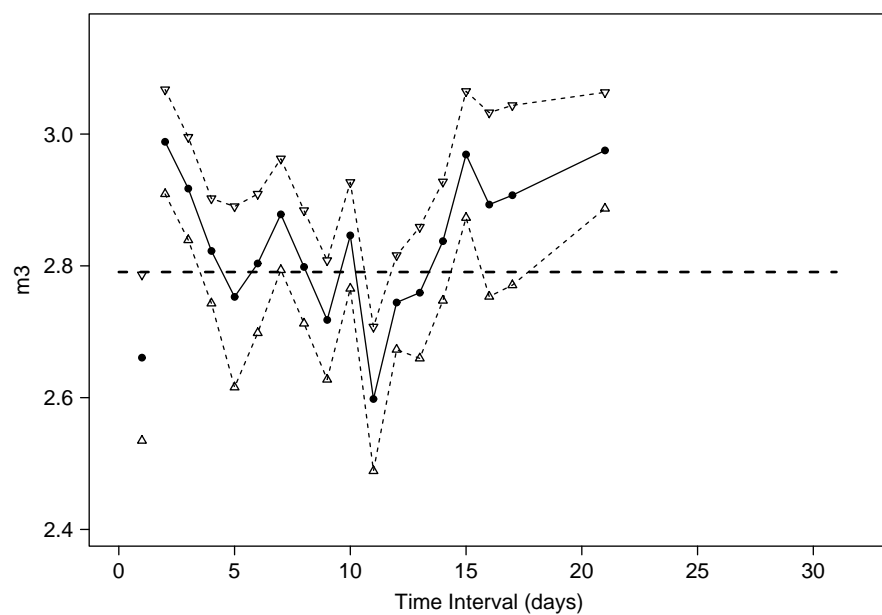

Figure S1.259. MLE of  $m_3$  by Time Interval Compared to Overall Mean (2.7907) for  $p = 6$  and  $f(t) = t$ .

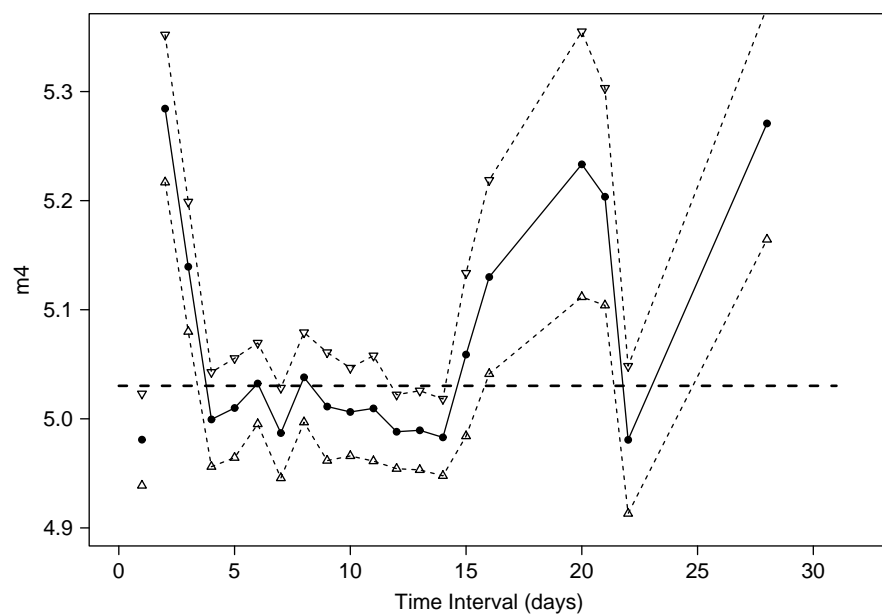

Figure S1.260. MLE of  $m_4$  by Time Interval Compared to Overall Mean (5.0302) for  $p = 6$  and  $f(t) = t$ .

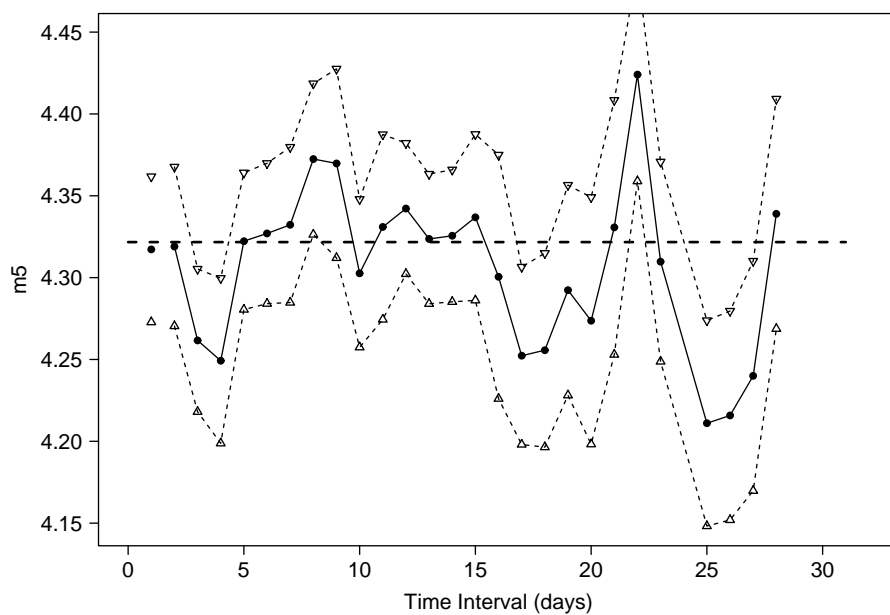

Figure S1.261. MLE of  $m_5$  by Time Interval Compared to Overall Mean (4.3217) for  $p = 6$  and  $f(t) = t$ .

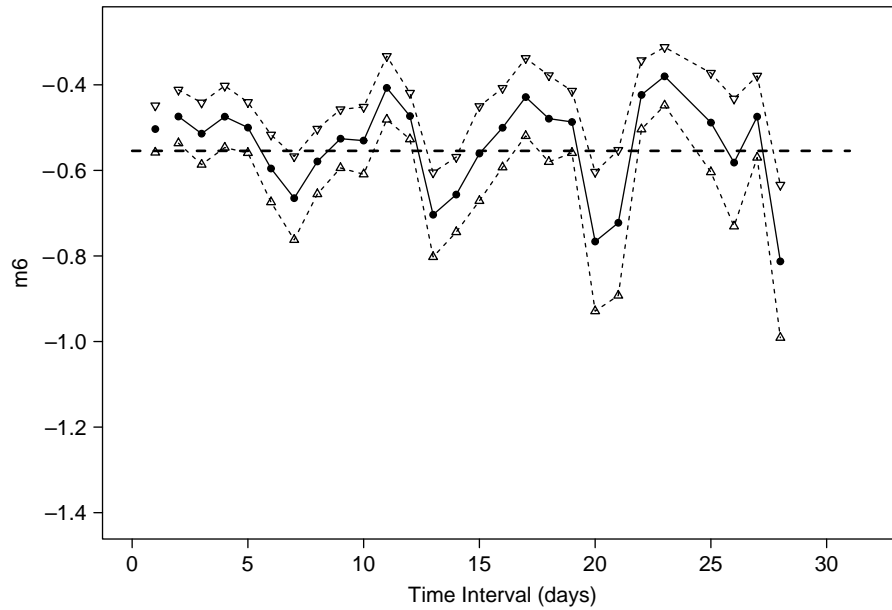

Figure S1.262. MLE of  $m_6$  by Time Interval Compared to Overall Mean (-0.5544) for  $p = 6$  and  $f(t) = t$ .

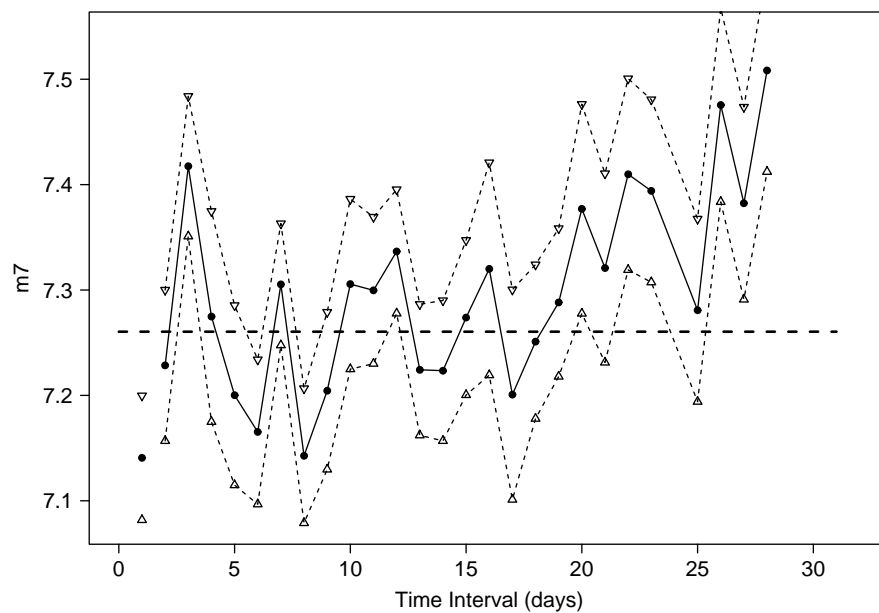

Figure S1.263. MLE of  $m_7$  by Time Interval Compared to Overall Mean (7.2604) for  $p = 6$  and  $f(t) = t$ .

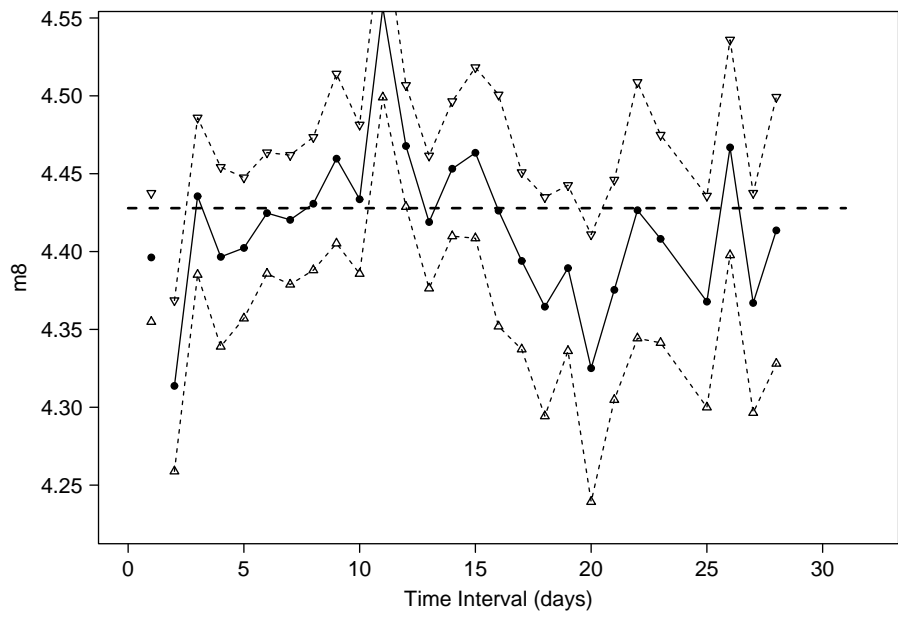

Figure S1.264. MLE of  $m_8$  by Time Interval Compared to Overall Mean (4.4279) for  $p = 6$  and  $f(t) = t$ .

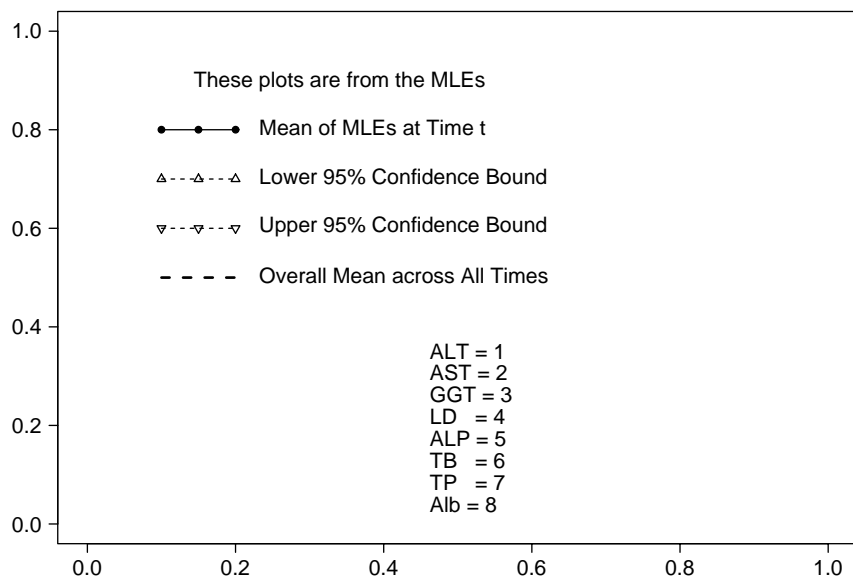

Legend for Plots for Figure S2.1 to Figure S2.264.

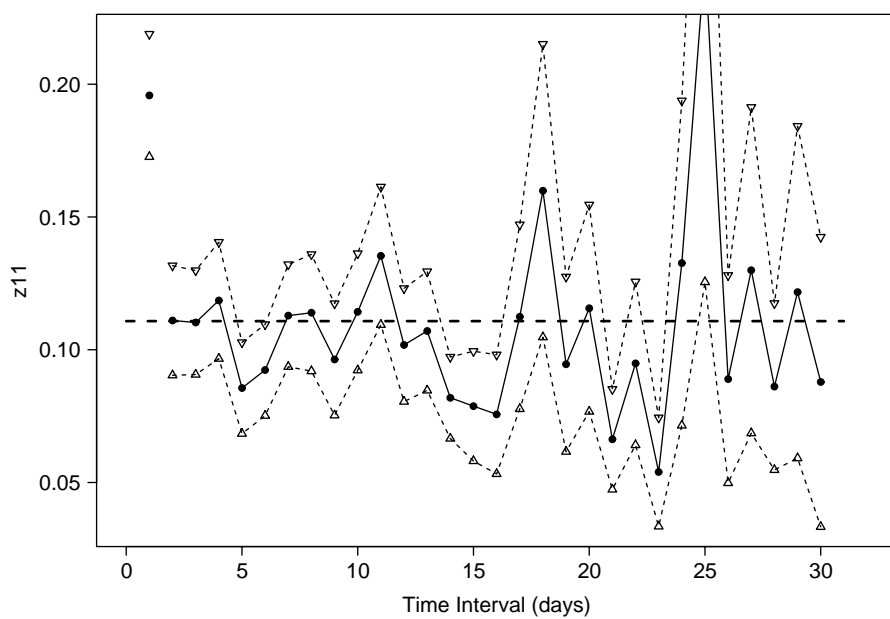

Figure S2.1. MLE of  $z_{11}$  by Time Interval Compared to Overall Mean (0.1108) for  $p = 1$  and  $f(t) = \sqrt{t}$ .

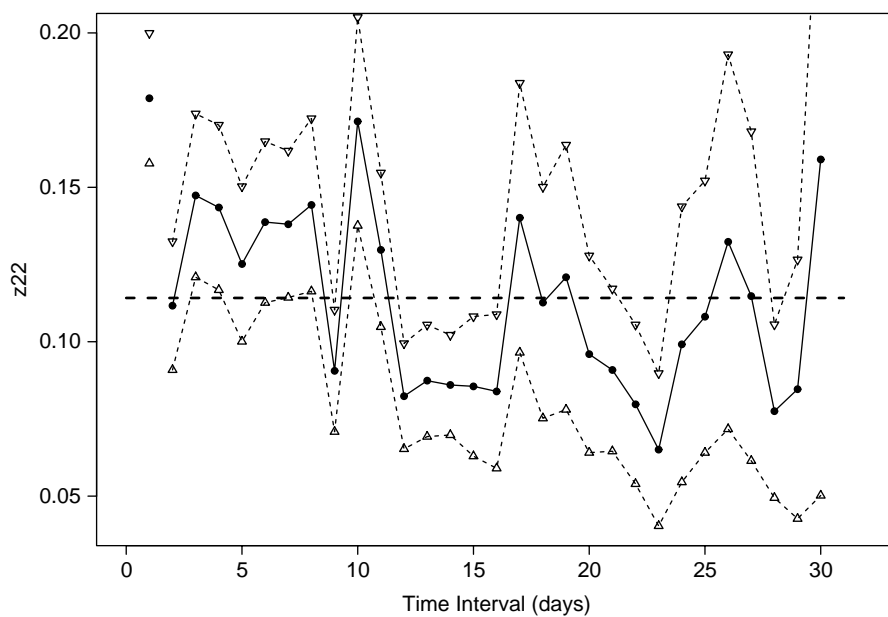

Figure S2.2. MLE of  $z_{22}$  by Time Interval Compared to Overall Mean (0.1142) for  $p = 1$  and  $f(t) = \sqrt{t}$ .

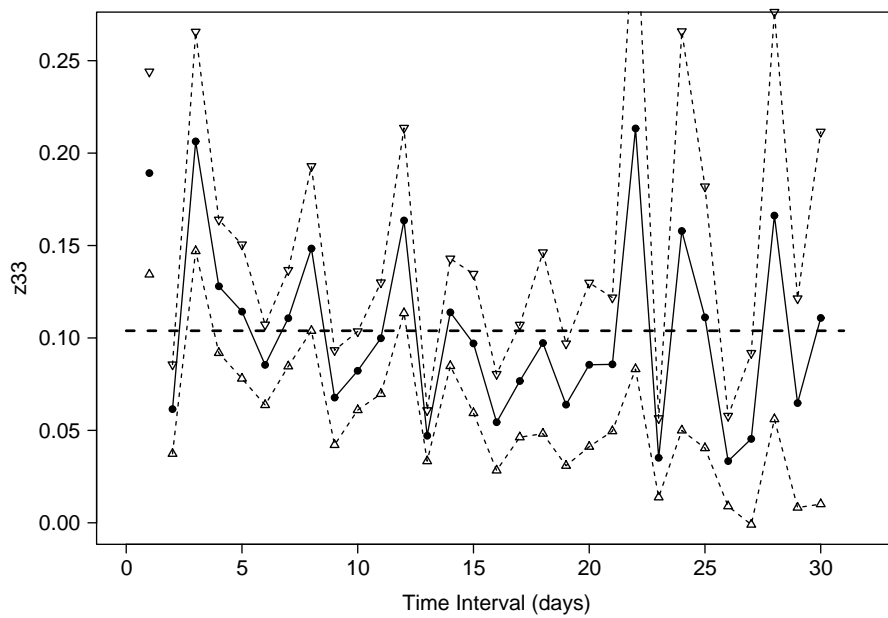

Figure S2.3. MLE of  $z_{33}$  by Time Interval Compared to Overall Mean (0.1039) for  $p = 1$  and  $f(t) = \sqrt{t}$ .

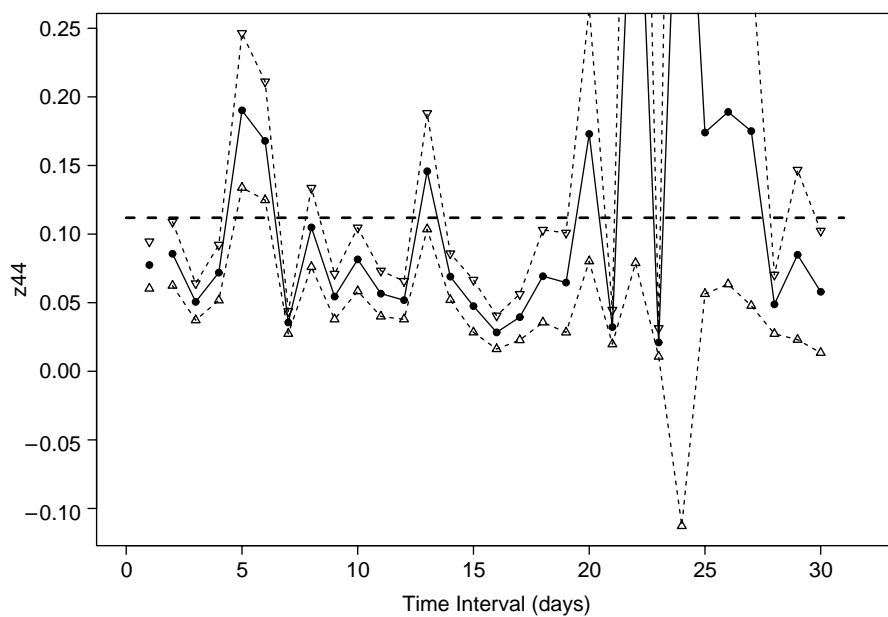

Figure S2.4. MLE of  $z_{44}$  by Time Interval Compared to Overall Mean (0.1119) for  $p = 1$  and  $f(t) = \sqrt{t}$ .

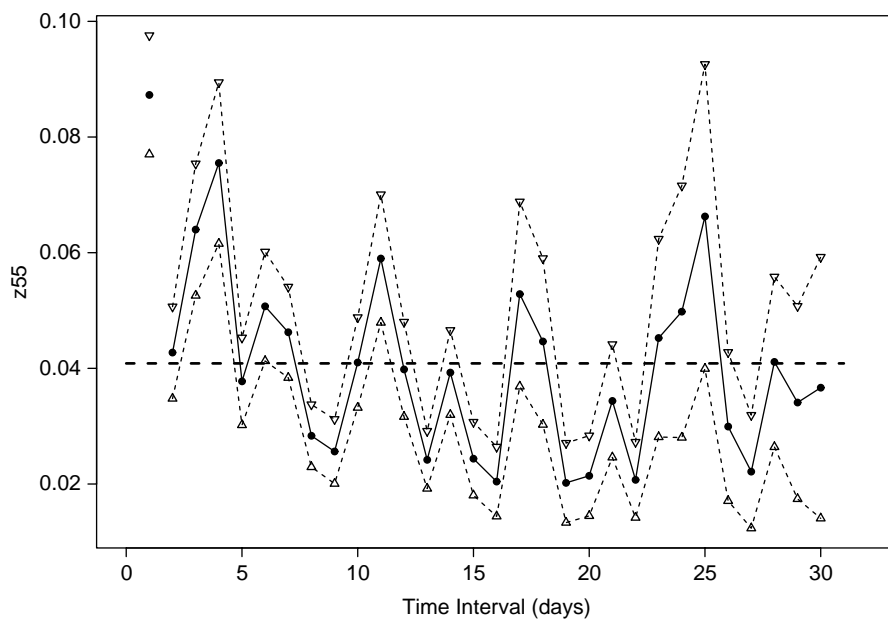

Figure S2.5. MLE of  $z_{55}$  by Time Interval Compared to Overall Mean (0.0409) for  $p = 1$  and  $f(t) = \sqrt{t}$ .



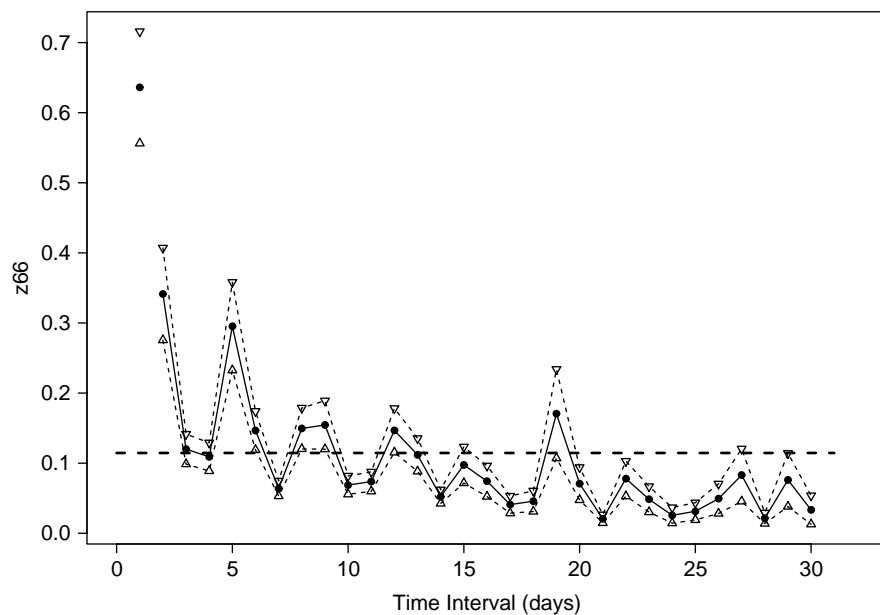

Figure S2.6. MLE of  $z_{66}$  by Time Interval Compared to Overall Mean (0.1145) for  $p = 1$  and  $f(t) = \sqrt{t}$ .

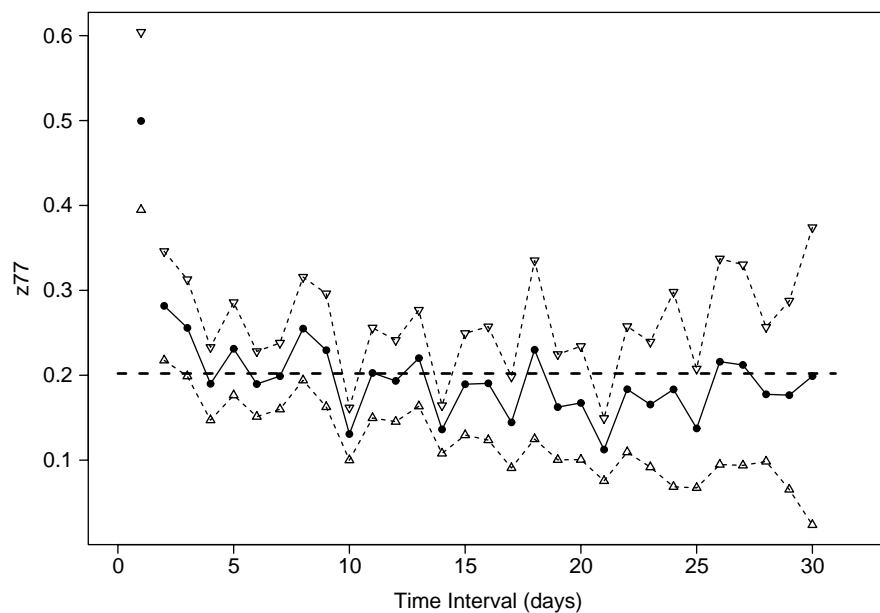

Figure S2.7. MLE of  $z_{77}$  by Time Interval Compared to Overall Mean (0.2021) for  $p = 1$  and  $f(t) = \sqrt{t}$ .

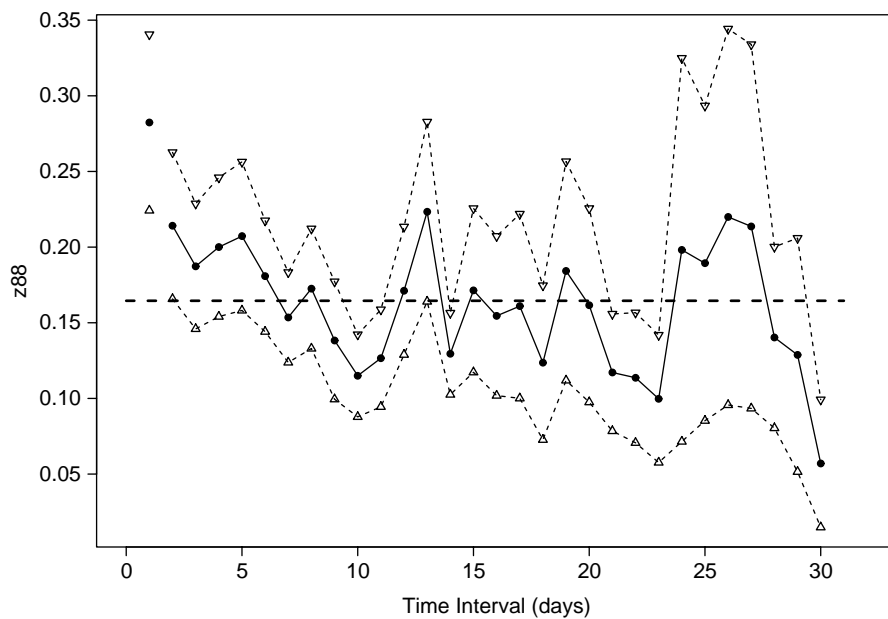

Figure S2.8. MLE of  $z_{88}$  by Time Interval Compared to Overall Mean (0.1645) for  $p = 1$  and  $f(t) = \sqrt{t}$ .

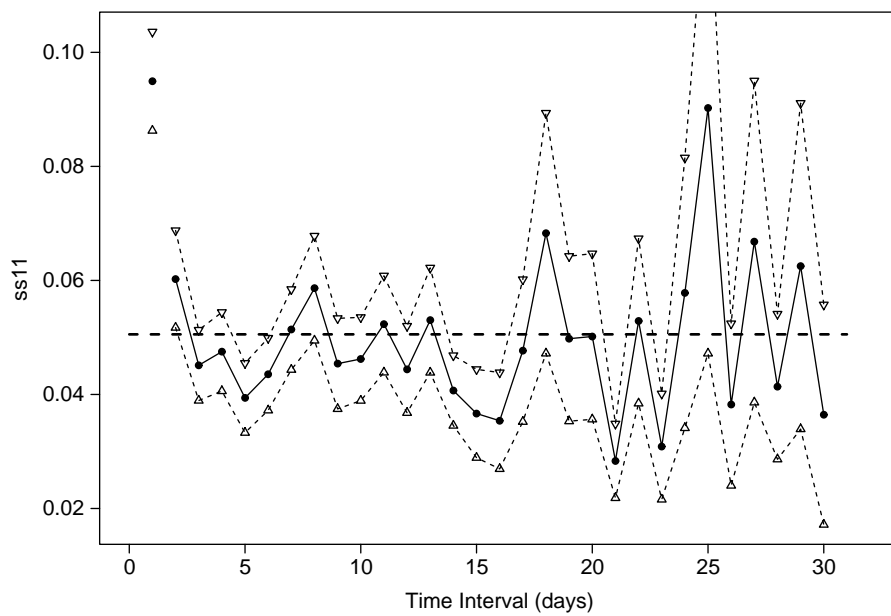

Figure S2.9. MLE of  $ss_{11}$  by Time Interval Compared to Overall Mean (0.0505) for  $p = 1$  and  $f(t) = \sqrt{t}$ .

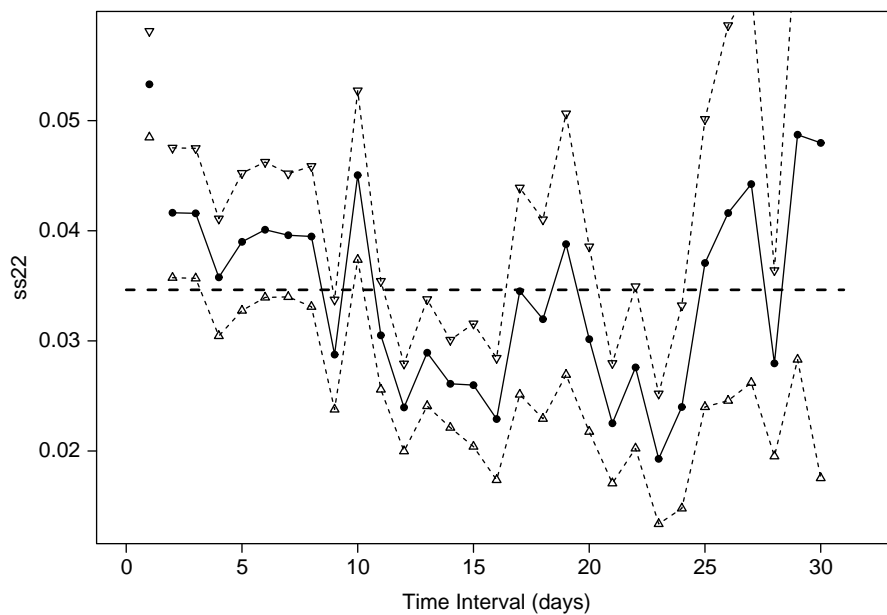

Figure S2.10. MLE of  $ss_{22}$  by Time Interval Compared to Overall Mean (0.0346) for  $p = 1$  and  $f(t) = \sqrt{t}$ .

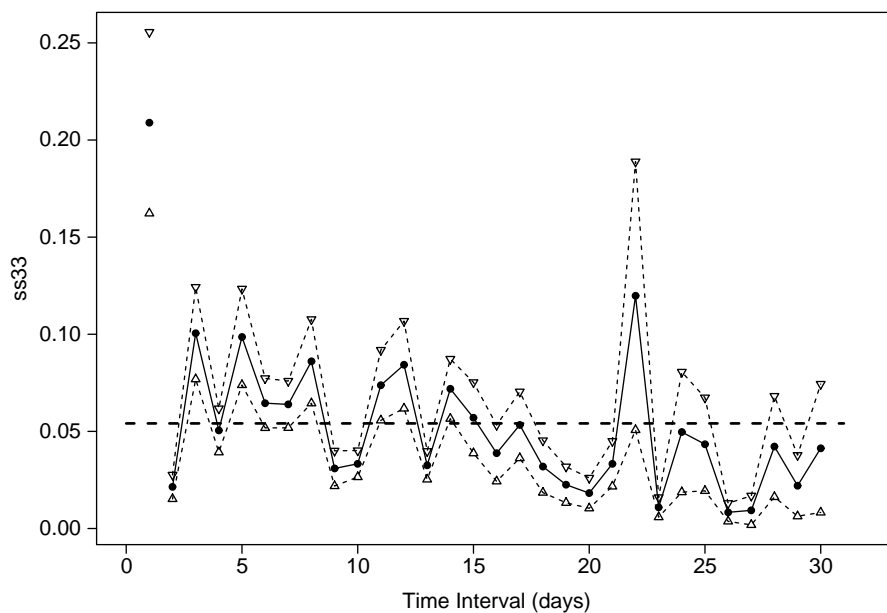

Figure S2.11. MLE of  $ss_{33}$  by Time Interval Compared to Overall Mean (0.0541) for  $p = 1$  and  $f(t) = \sqrt{t}$ .

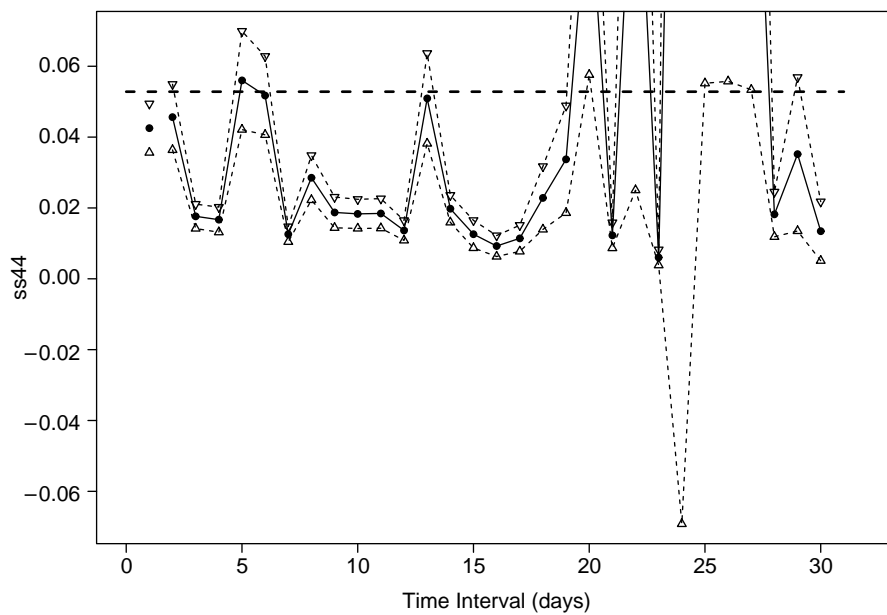

Figure S2.12. MLE of  $ss44$  by Time Interval Compared to Overall Mean (0.0528) for  $p = 1$  and  $f(t) = \sqrt{t}$ .

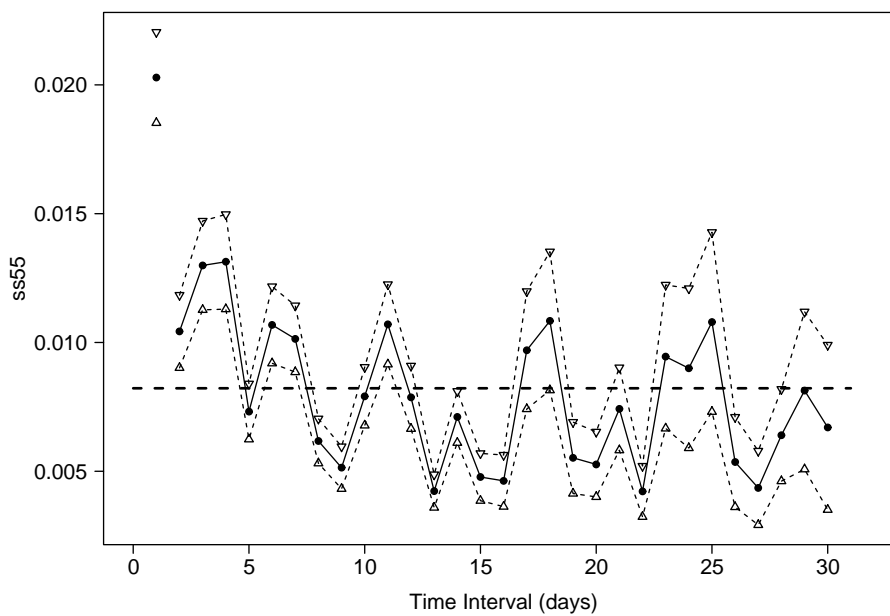

Figure S2.13. MLE of  $ss55$  by Time Interval Compared to Overall Mean (0.0082) for  $p = 1$  and  $f(t) = \sqrt{t}$ .

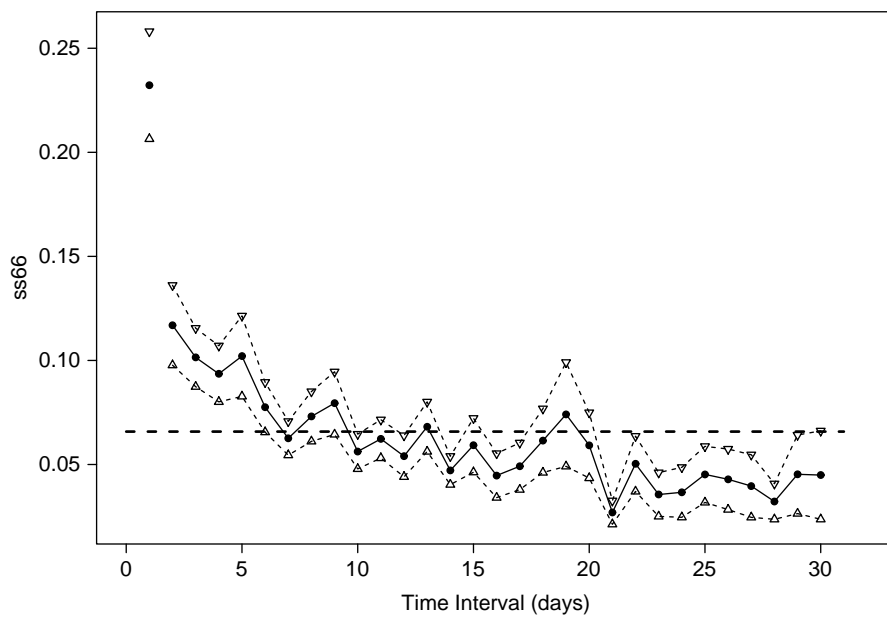

Figure S2.14. MLE of  $ss66$  by Time Interval Compared to Overall Mean (0.0658) for  $p = 1$  and  $f(t) = \sqrt{t}$ .

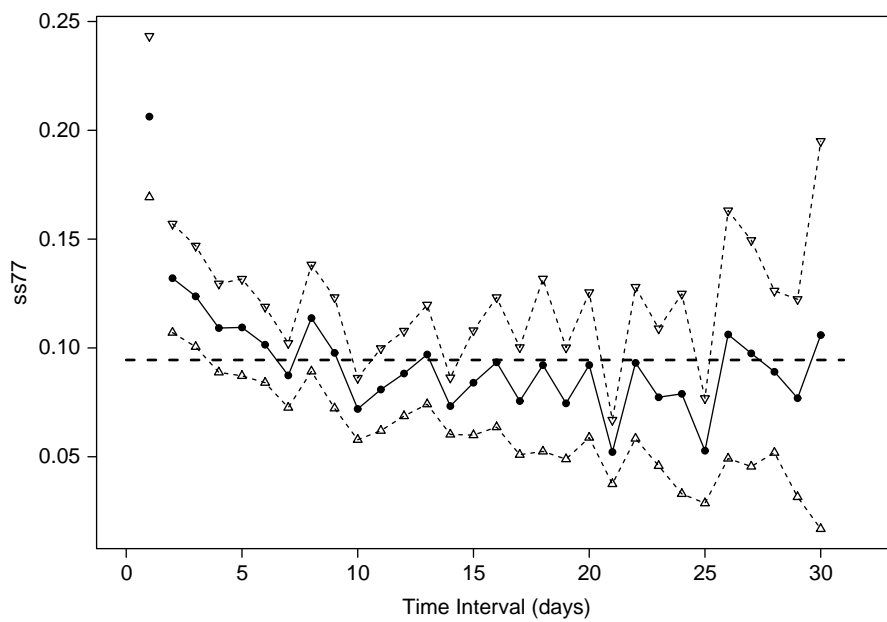

Figure S2.15. MLE of  $ss77$  by Time Interval Compared to Overall Mean (0.0945) for  $p = 1$  and  $f(t) = \sqrt{t}$ .

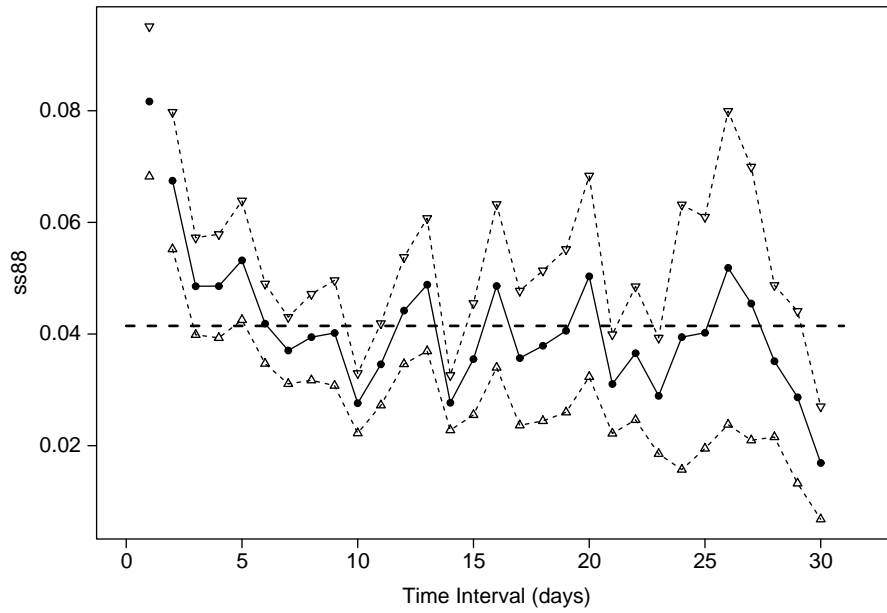

Figure S2.16. MLE of ss88 by Time Interval Compared to Overall Mean (0.0415) for  $p = 1$  and  $f(t) = \sqrt{t}$ .

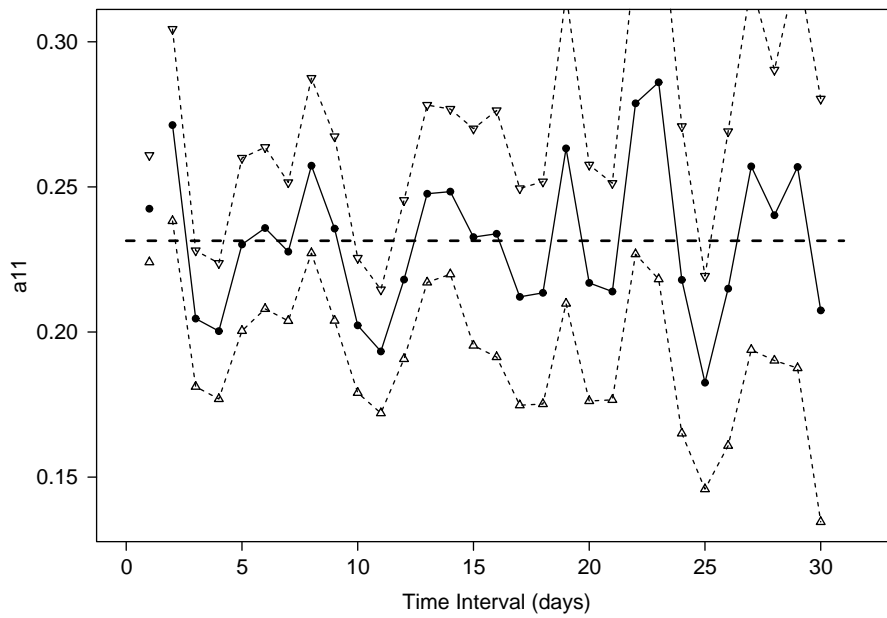

Figure S2.17. MLE of a11 by Time Interval Compared to Overall Mean (0.2314) for  $p = 1$  and  $f(t) = \sqrt{t}$ .

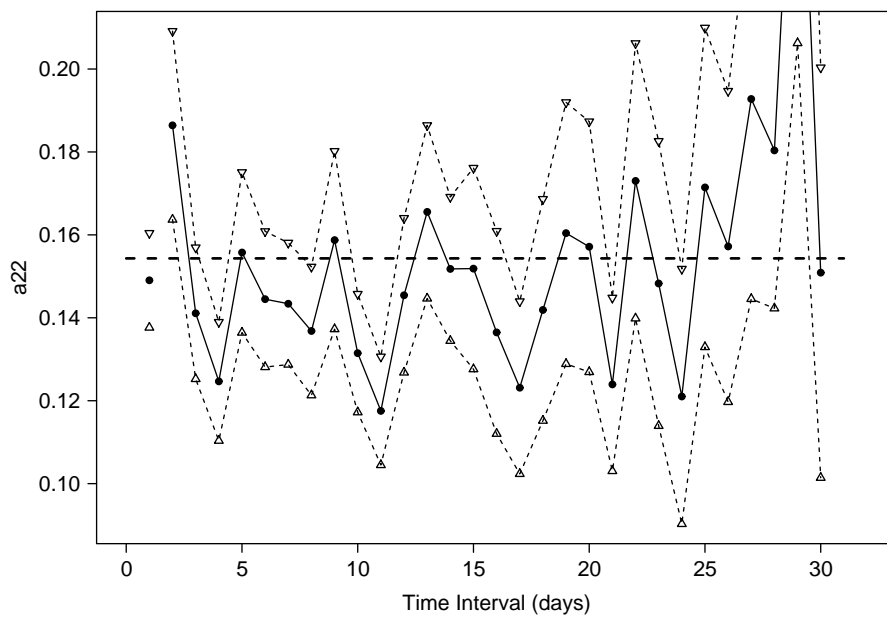

Figure S2.18. MLE of  $a_{22}$  by Time Interval Compared to Overall Mean (0.1543) for  $p = 1$  and  $f(t) = \sqrt{t}$ .

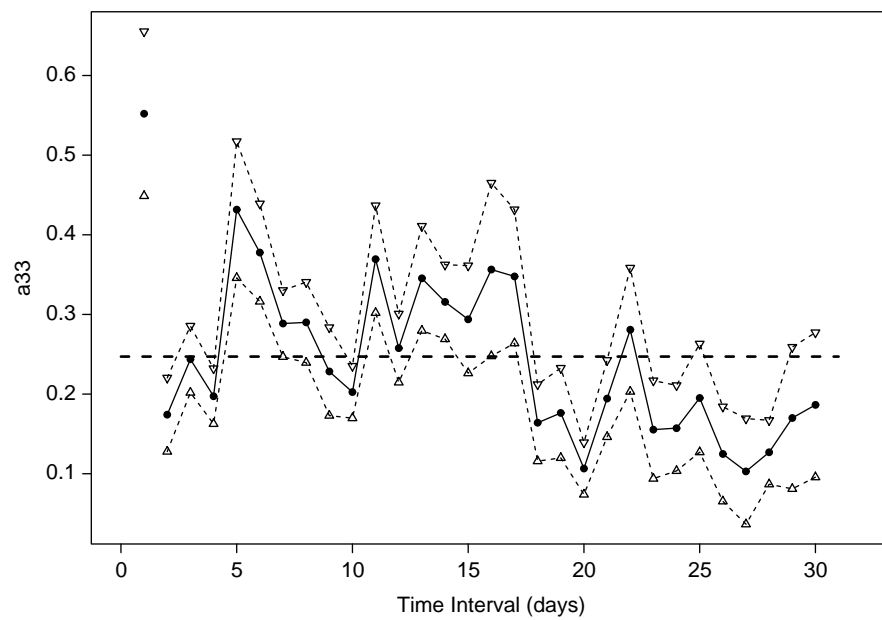

Figure S2.19. MLE of  $a_{33}$  by Time Interval Compared to Overall Mean (0.2471) for  $p = 1$  and  $f(t) = \sqrt{t}$ .

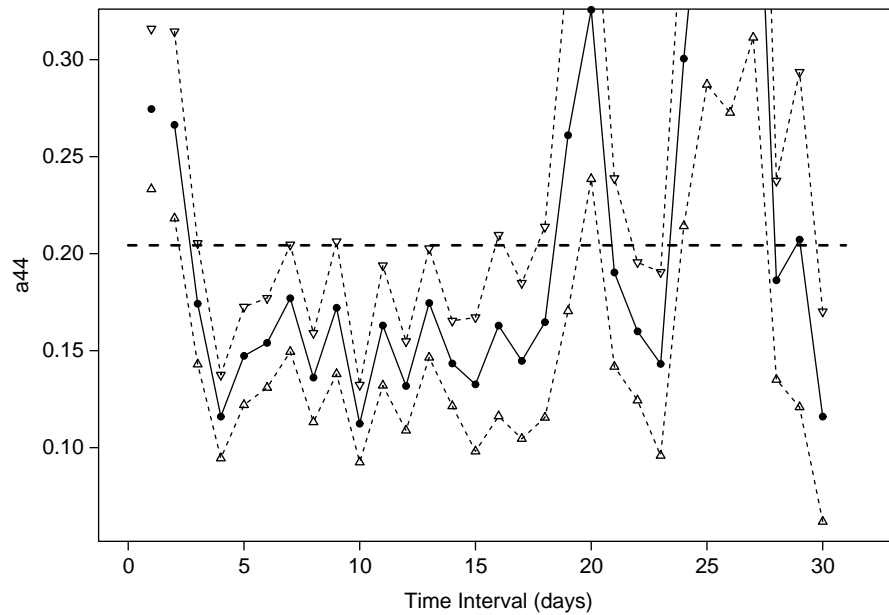

Figure S2.20. MLE of  $a_{44}$  by Time Interval Compared to Overall Mean (0.2043) for  $p = 1$  and  $f(t) = \sqrt{t}$ .

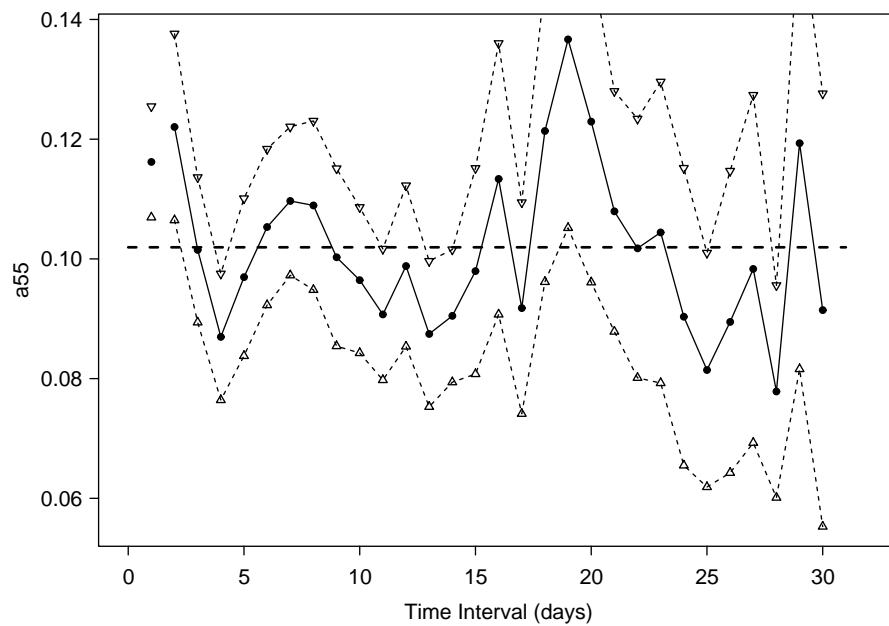

Figure S2.21. MLE of  $a_{55}$  by Time Interval Compared to Overall Mean (0.1019) for  $p = 1$  and  $f(t) = \sqrt{t}$ .



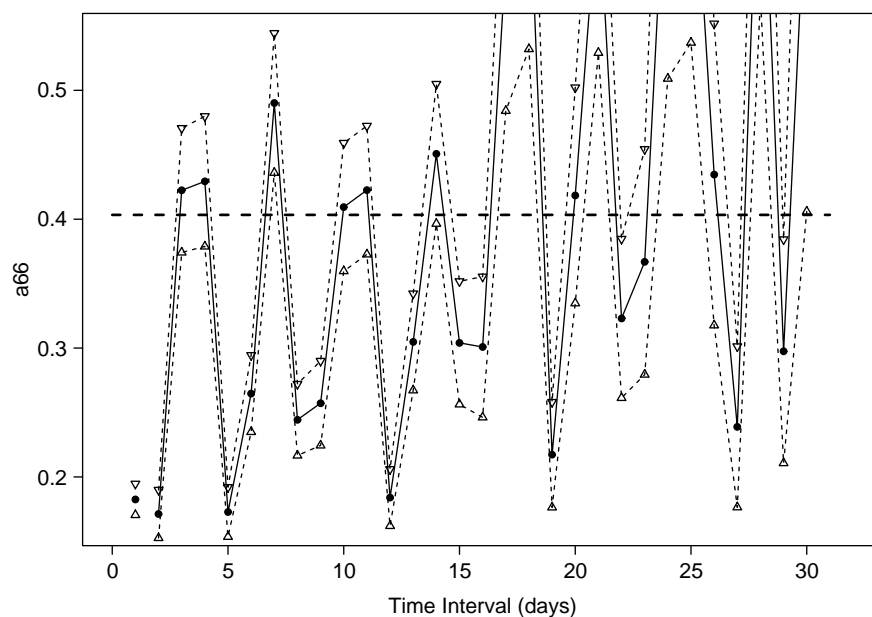

Figure S2.22. MLE of  $a_{66}$  by Time Interval Compared to Overall Mean (0.4033) for  $p = 1$  and  $f(t) = \sqrt{t}$ .

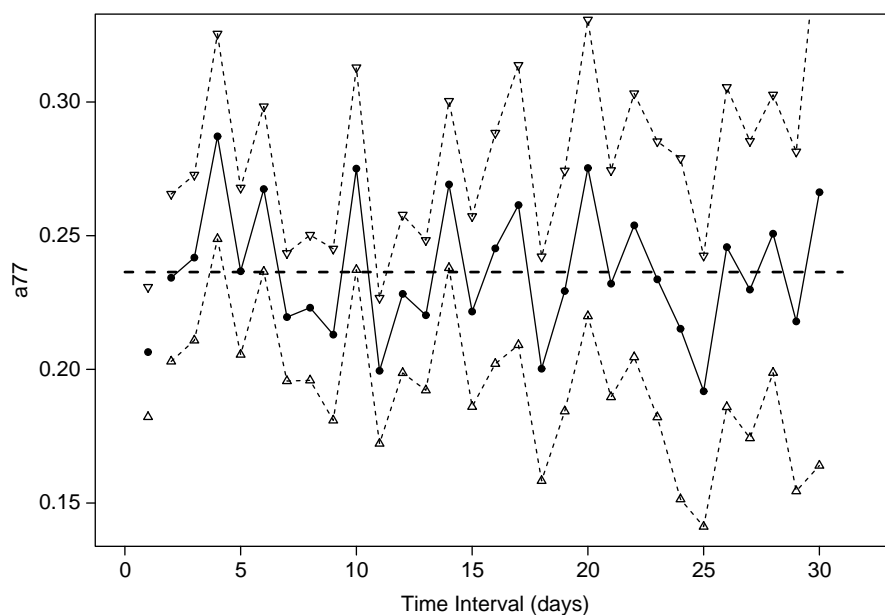

Figure S2.23. MLE of  $a_{77}$  by Time Interval Compared to Overall Mean (0.2364) for  $p = 1$  and  $f(t) = \sqrt{t}$ .

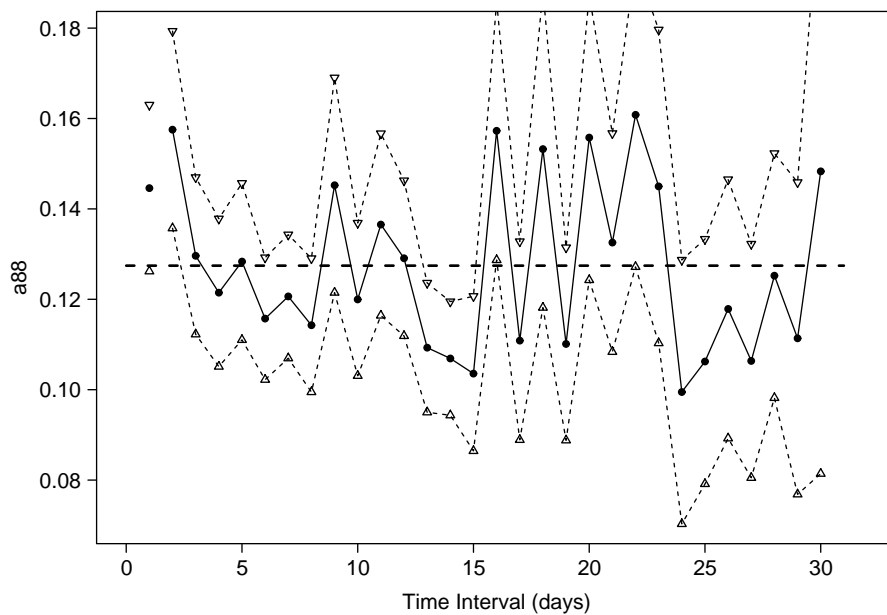

Figure S2.24. MLE of  $a_{88}$  by Time Interval Compared to Overall Mean (0.1274) for  $p = 1$  and  $f(t) = \sqrt{t}$ .

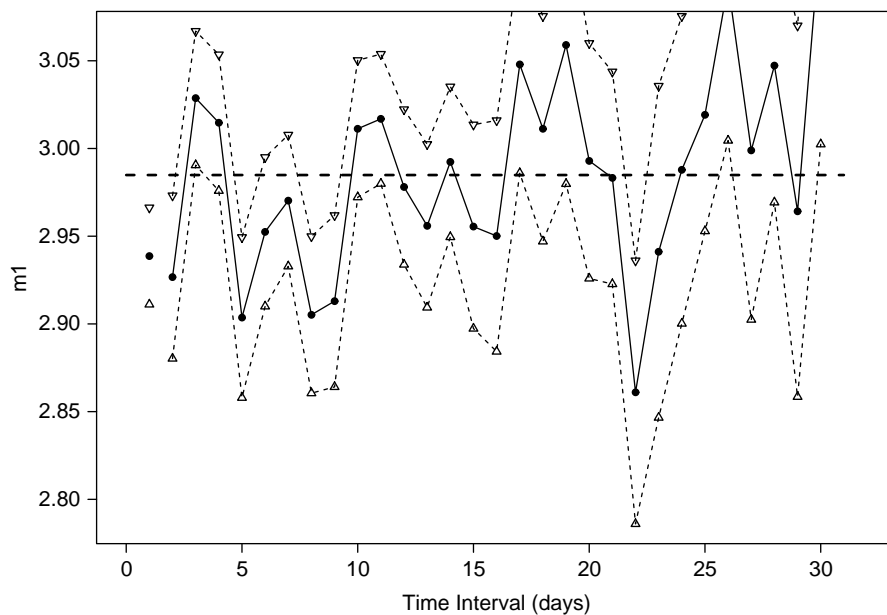

Figure S2.25. MLE of  $m_1$  by Time Interval Compared to Overall Mean (2.9849) for  $p = 1$  and  $f(t) = \sqrt{t}$ .

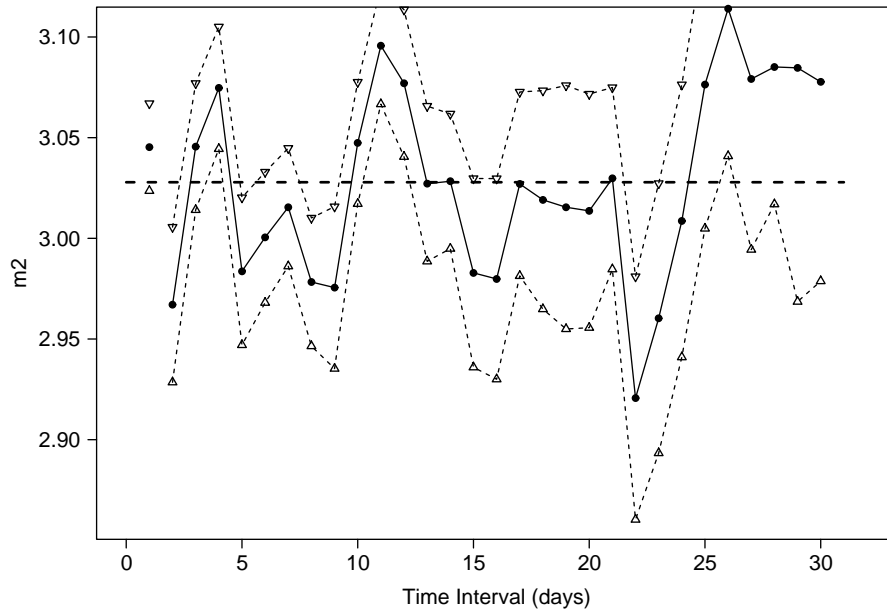

Figure S2.26. MLE of  $m_2$  by Time Interval Compared to Overall Mean (3.0279) for  $p = 1$  and  $f(t) = \sqrt{t}$ .

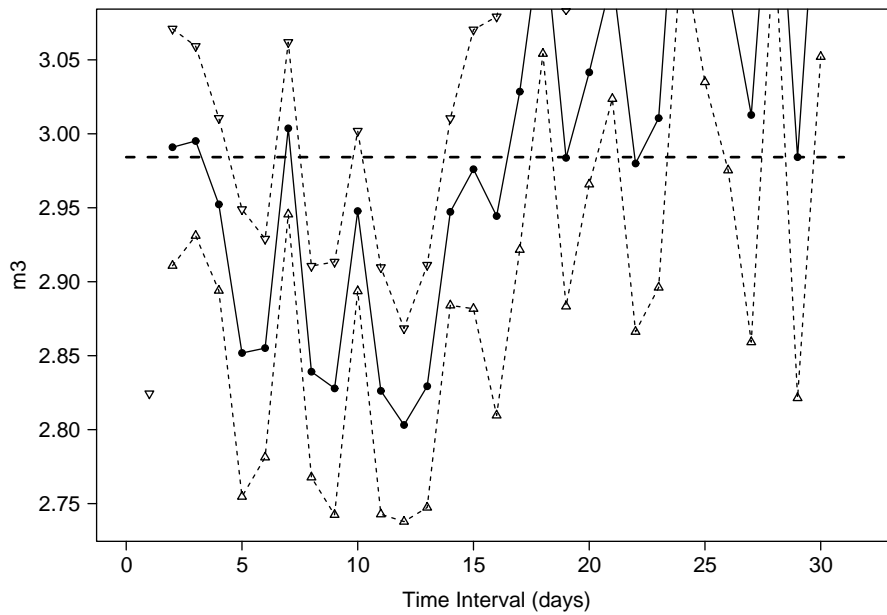

Figure S2.27. MLE of  $m_3$  by Time Interval Compared to Overall Mean (2.9842) for  $p = 1$  and  $f(t) = \sqrt{t}$ .

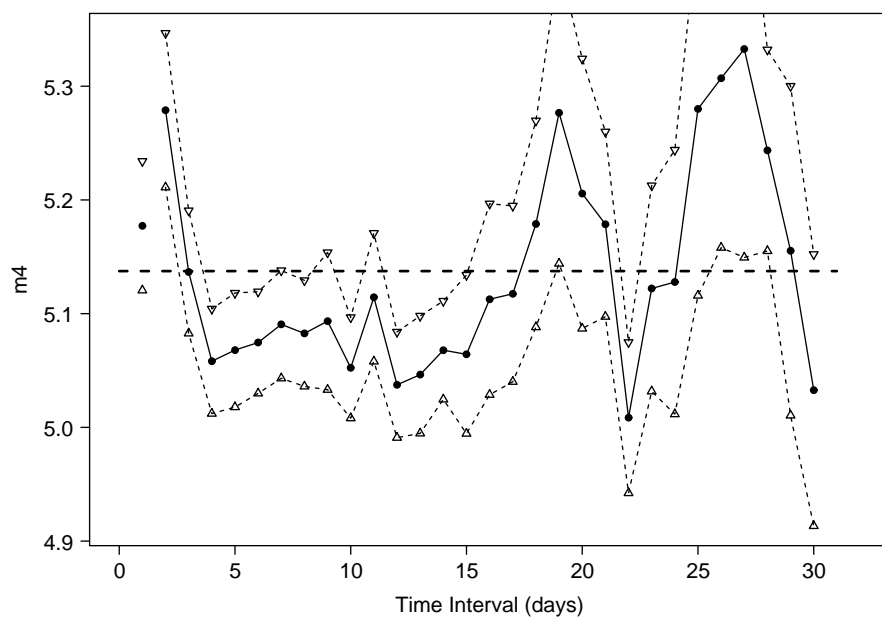

Figure S2.28. MLE of  $m_4$  by Time Interval Compared to Overall Mean (5.1374) for  $p = 1$  and  $f(t) = \sqrt{t}$ .

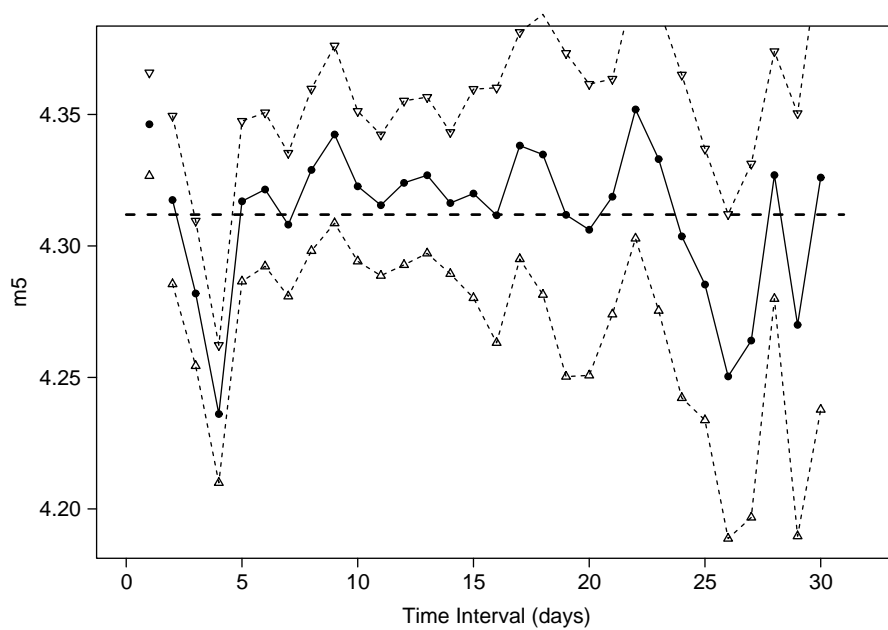

Figure S2.29. MLE of  $m_5$  by Time Interval Compared to Overall Mean (4.3119) for  $p = 1$  and  $f(t) = \sqrt{t}$ .

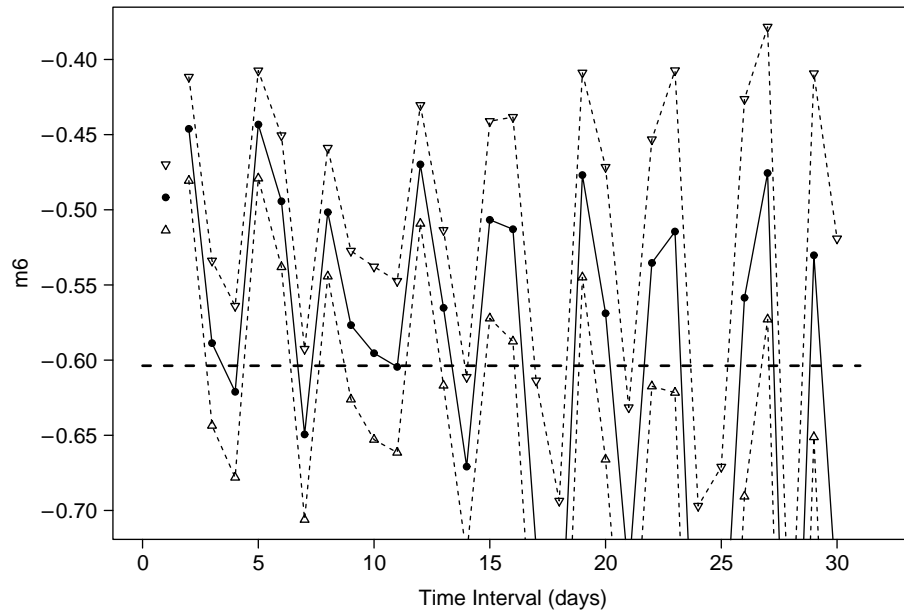

Figure S2.30. MLE of  $m_6$  by Time Interval Compared to Overall Mean ( $-0.6037$ ) for  $p = 1$  and  $f(t) = \sqrt{t}$ .

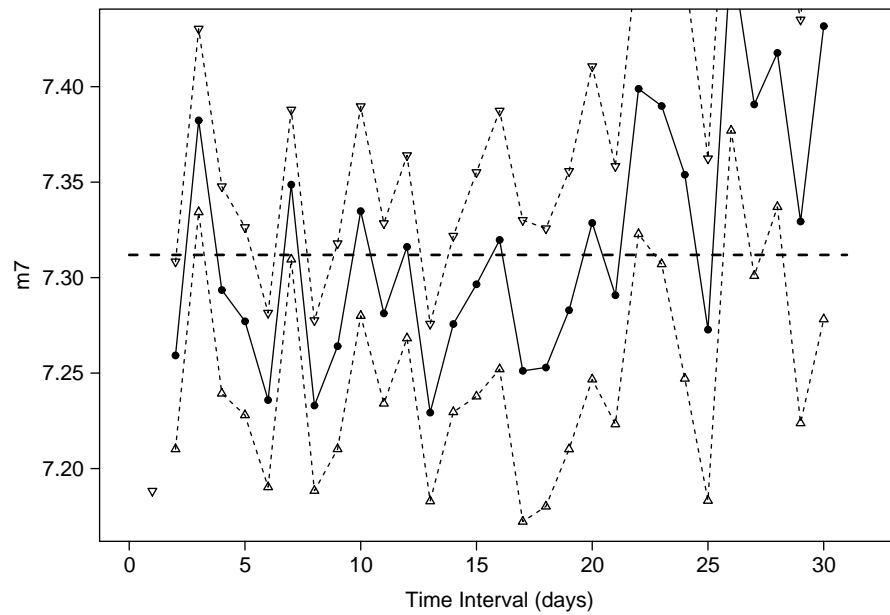

Figure S2.31. MLE of  $m_7$  by Time Interval Compared to Overall Mean ( $7.3119$ ) for  $p = 1$  and  $f(t) = \sqrt{t}$ .

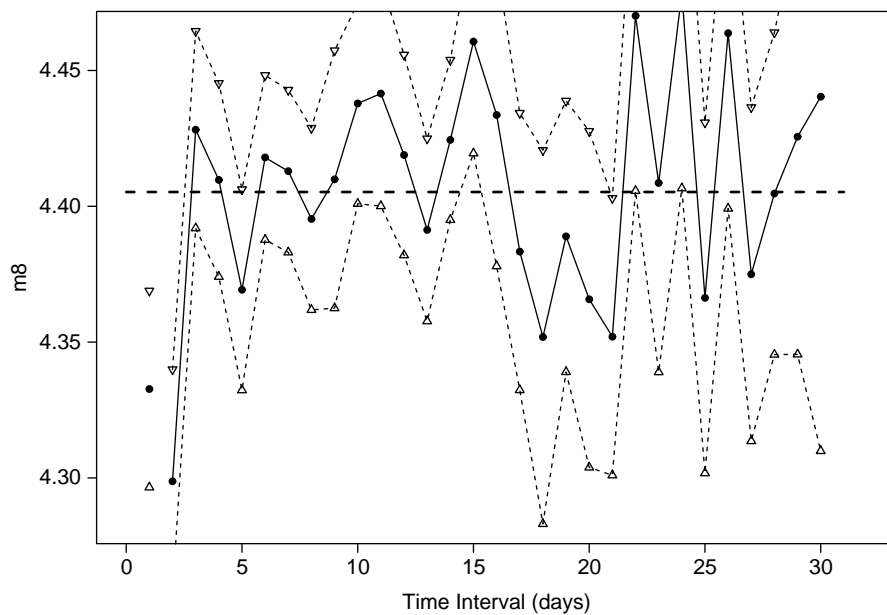

Figure S2.32. MLE of  $m_8$  by Time Interval Compared to Overall Mean (4.4053) for  $p = 1$  and  $f(t) = \sqrt{t}$ .

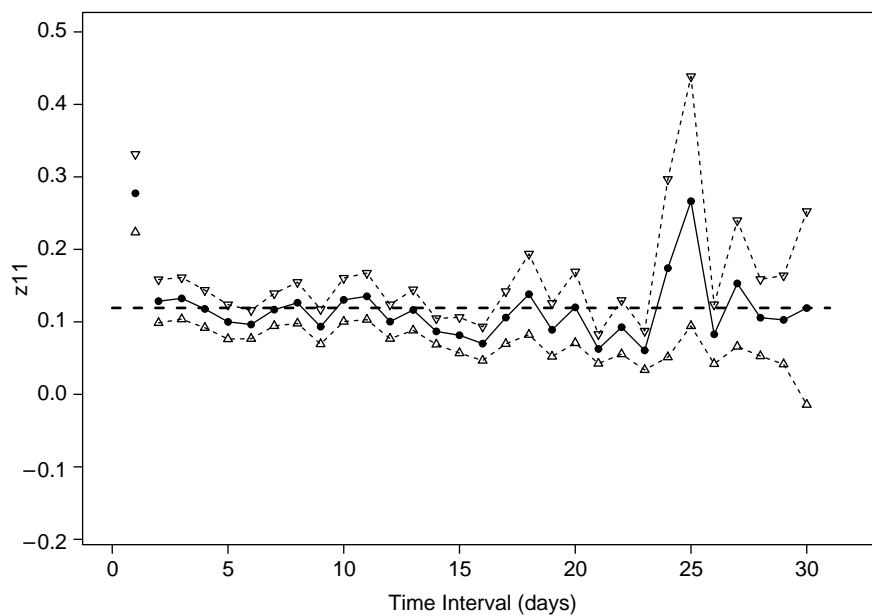

Figure S2.33. MLE of  $z_{11}$  by Time Interval Compared to Overall Mean (0.1192) for  $p = 2$  and  $f(t) = \sqrt{t}$ .

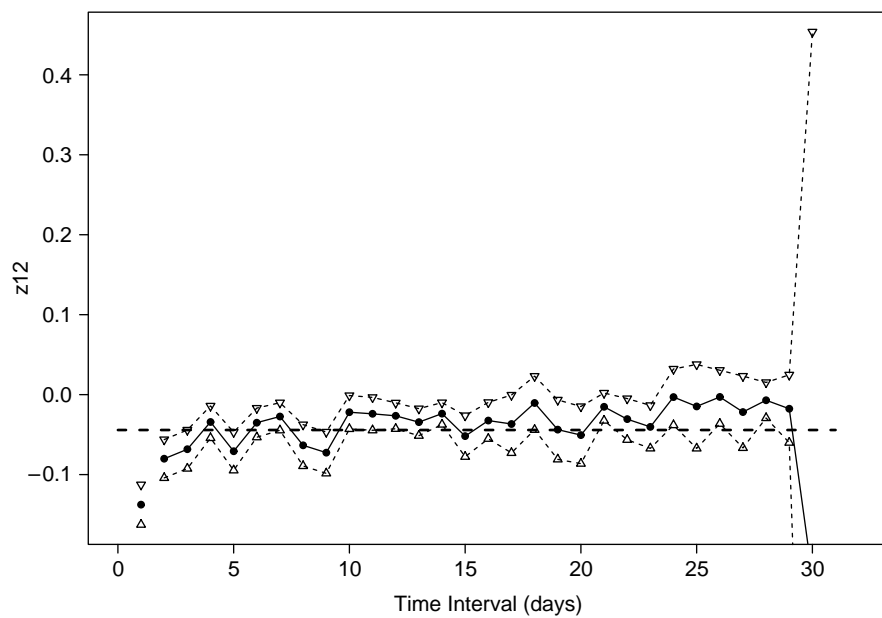

Figure S2.34. MLE of  $z_{12}$  by Time Interval Compared to Overall Mean ( $-0.0443$ ) for  $p = 2$  and  $f(t) = \sqrt{t}$ .

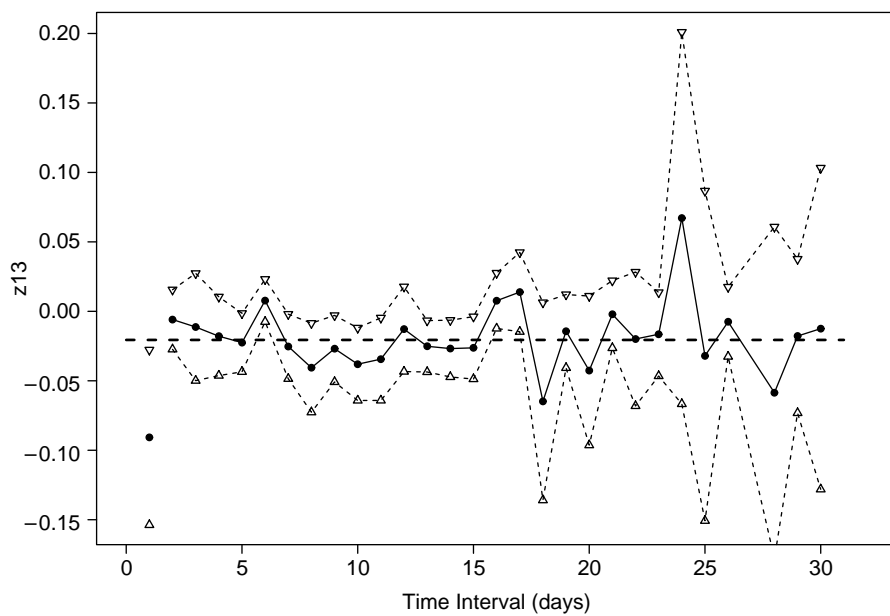

Figure S2.35. MLE of  $z_{13}$  by Time Interval Compared to Overall Mean ( $-0.0206$ ) for  $p = 2$  and  $f(t) = \sqrt{t}$ .

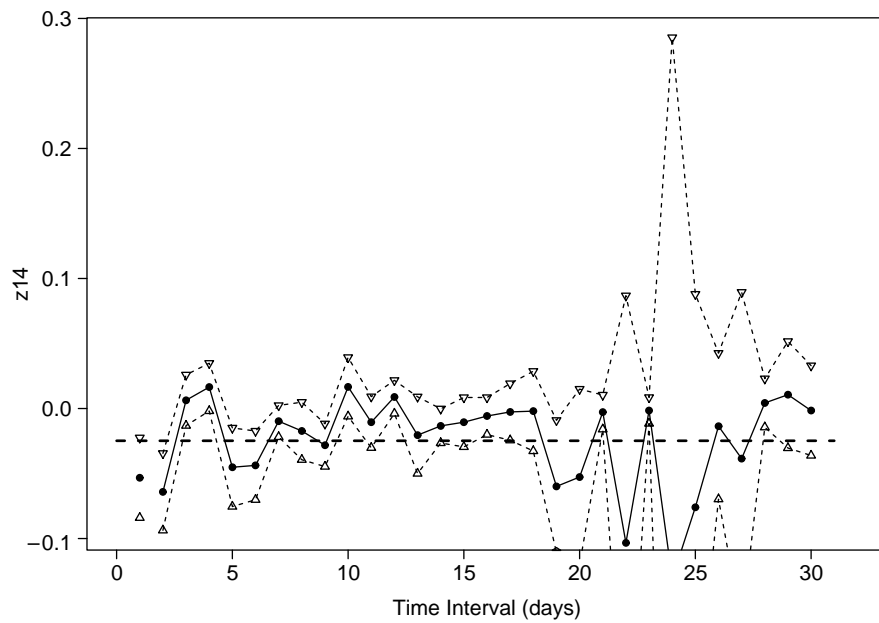

Figure S2.36. MLE of  $z_{14}$  by Time Interval Compared to Overall Mean ( $-0.0248$ ) for  $p = 2$  and  $f(t) = \sqrt{t}$ .

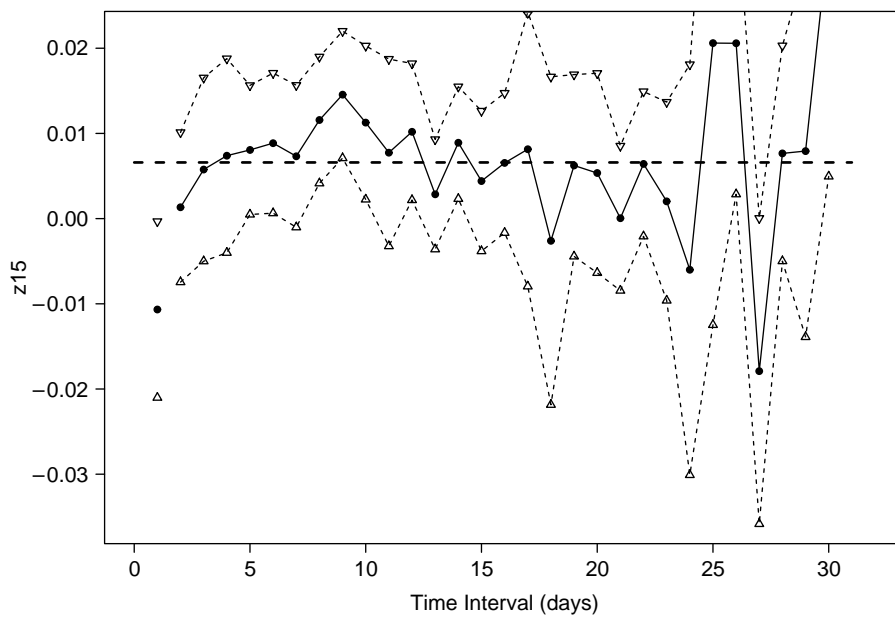

Figure S2.37. MLE of  $z_{15}$  by Time Interval Compared to Overall Mean ( $0.0066$ ) for  $p = 2$  and  $f(t) = \sqrt{t}$ .



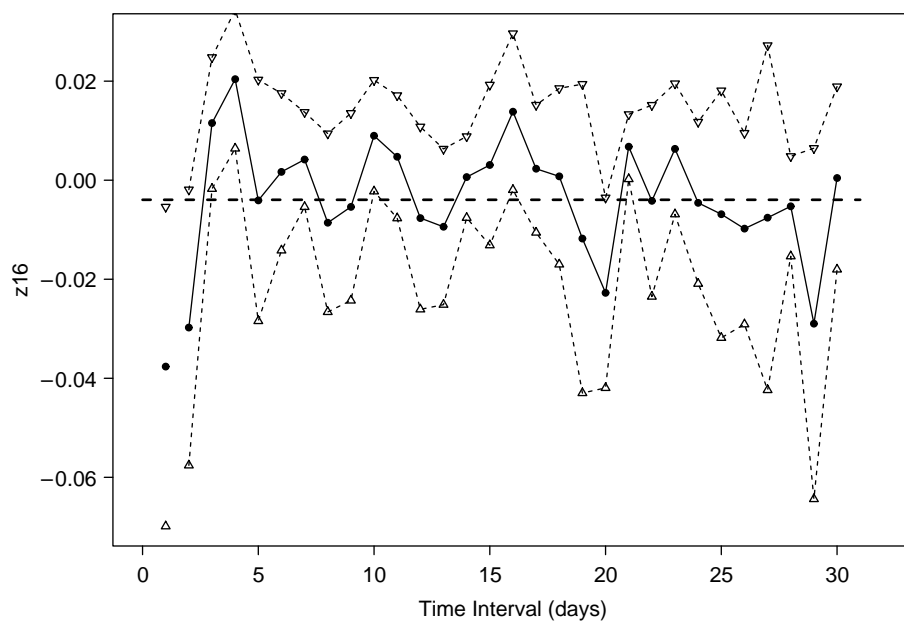

Figure S2.38. MLE of  $z_{16}$  by Time Interval Compared to Overall Mean ( $-0.004$ ) for  $p = 2$  and  $f(t) = \sqrt{t}$ .

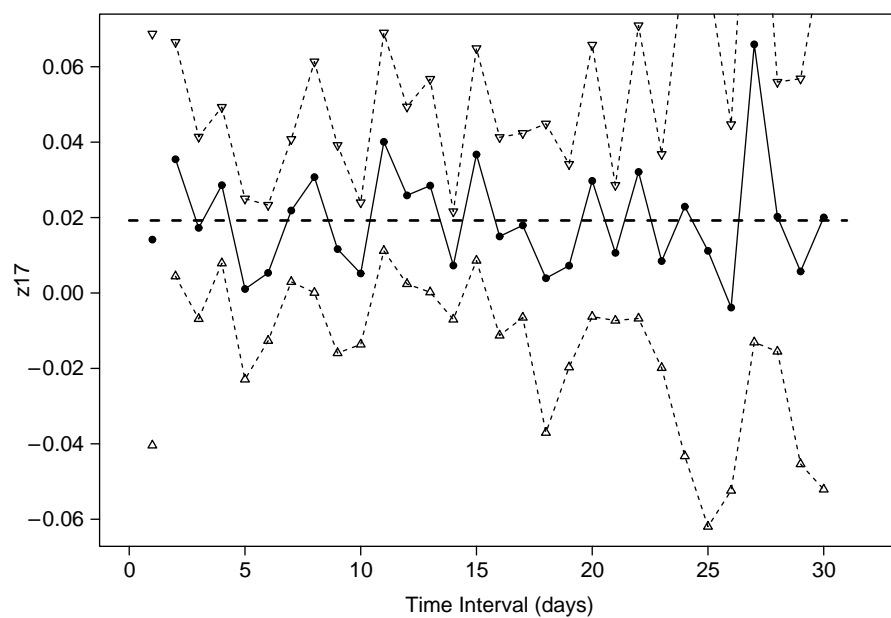

Figure S2.39. MLE of  $z_{17}$  by Time Interval Compared to Overall Mean ( $0.0192$ ) for  $p = 2$  and  $f(t) = \sqrt{t}$ .

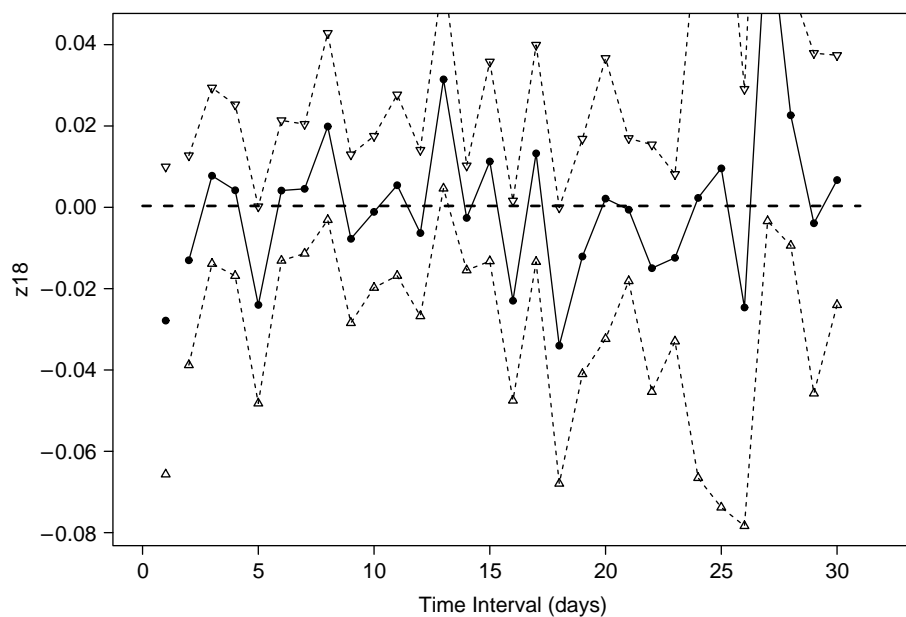

Figure S2.40. MLE of  $z_{18}$  by Time Interval Compared to Overall Mean ( $3e-04$ ) for  $p = 2$  and  $f(t) = \sqrt{t}$ .

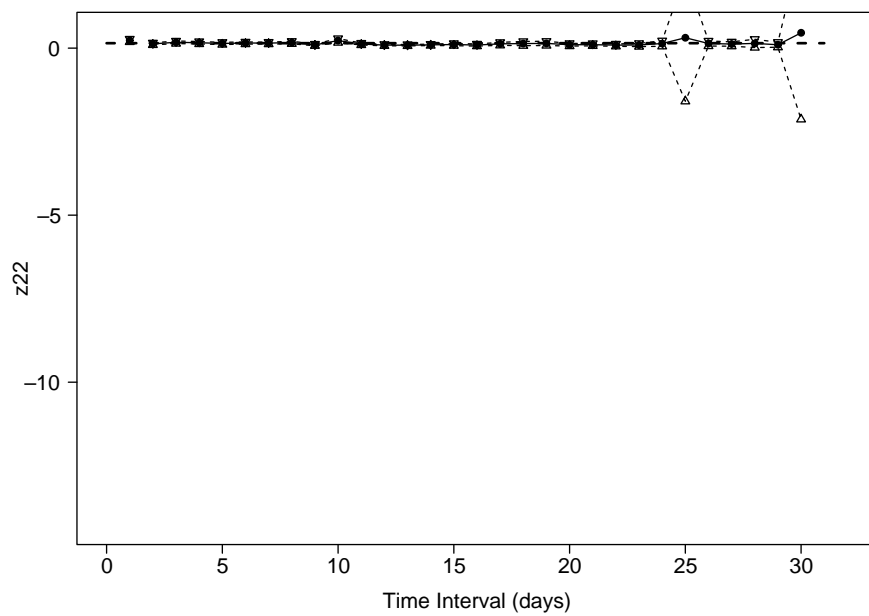

Figure S2.41. MLE of  $z_{22}$  by Time Interval Compared to Overall Mean ( $0.1479$ ) for  $p = 2$  and  $f(t) = \sqrt{t}$ .

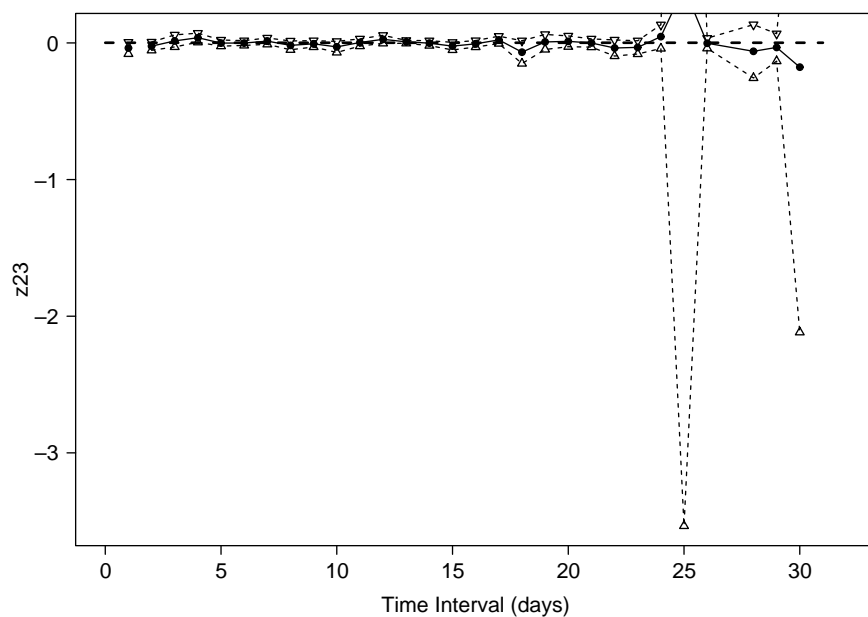

Figure S2.42. MLE of  $z_{23}$  by Time Interval Compared to Overall Mean (0.0013) for  $p = 2$  and  $f(t) = \sqrt{t}$ .

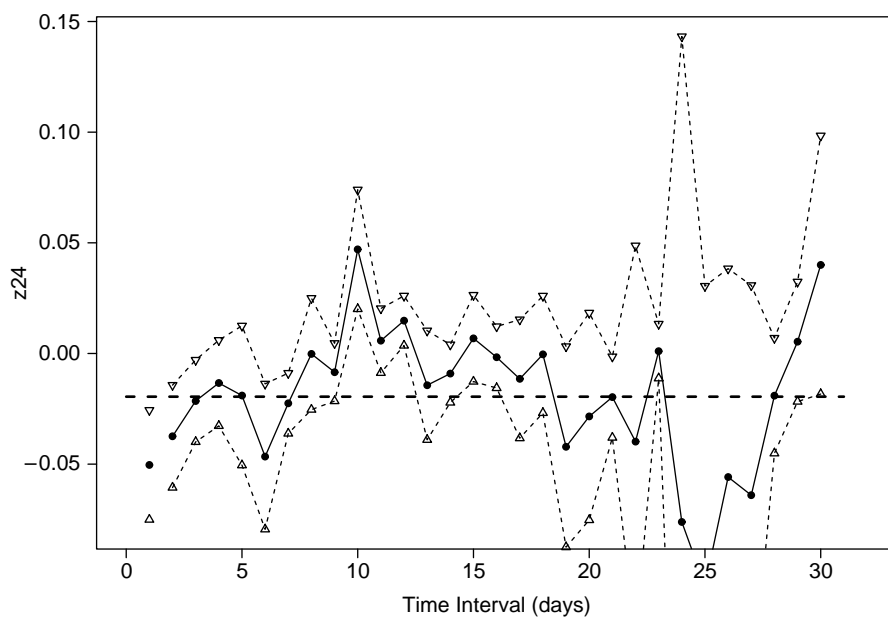

Figure S2.43. MLE of  $z_{24}$  by Time Interval Compared to Overall Mean ( $-0.0195$ ) for  $p = 2$  and  $f(t) = \sqrt{t}$ .

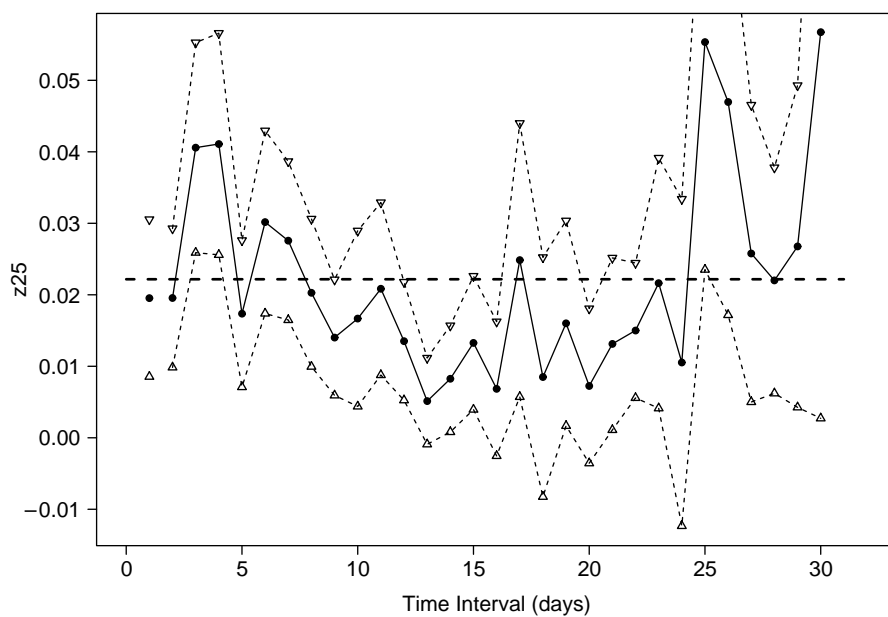

Figure S2.44. MLE of  $z_{25}$  by Time Interval Compared to Overall Mean (0.0222) for  $p = 2$  and  $f(t) = \sqrt{t}$ .

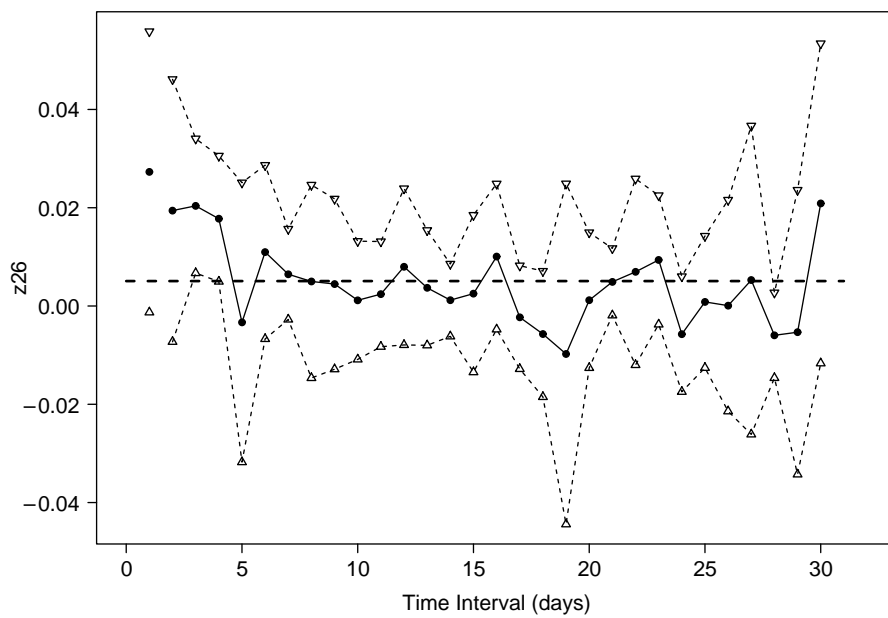

Figure S2.45. MLE of  $z_{26}$  by Time Interval Compared to Overall Mean (0.0051) for  $p = 2$  and  $f(t) = \sqrt{t}$ .

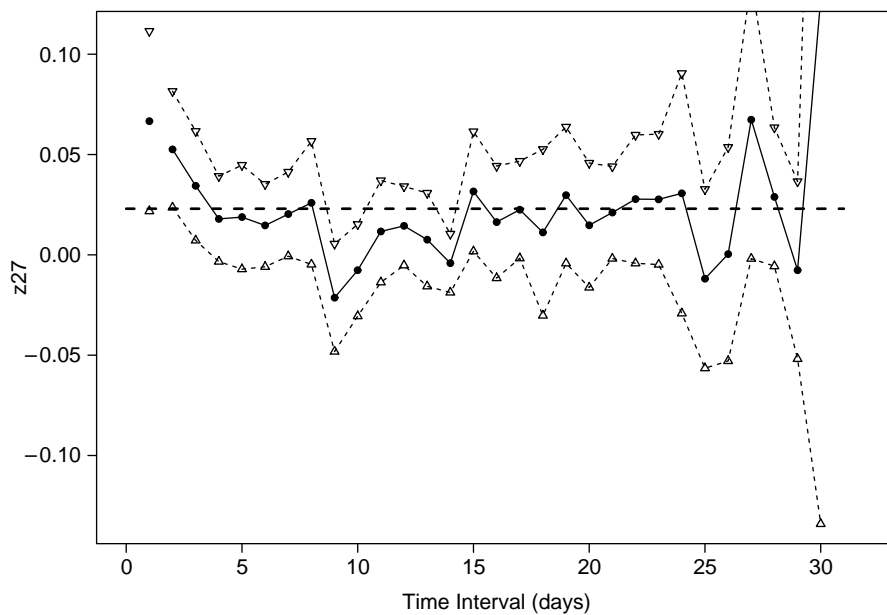

Figure S2.46. MLE of  $z_{27}$  by Time Interval Compared to Overall Mean (0.023) for  $p = 2$  and  $f(t) = \sqrt{t}$ .

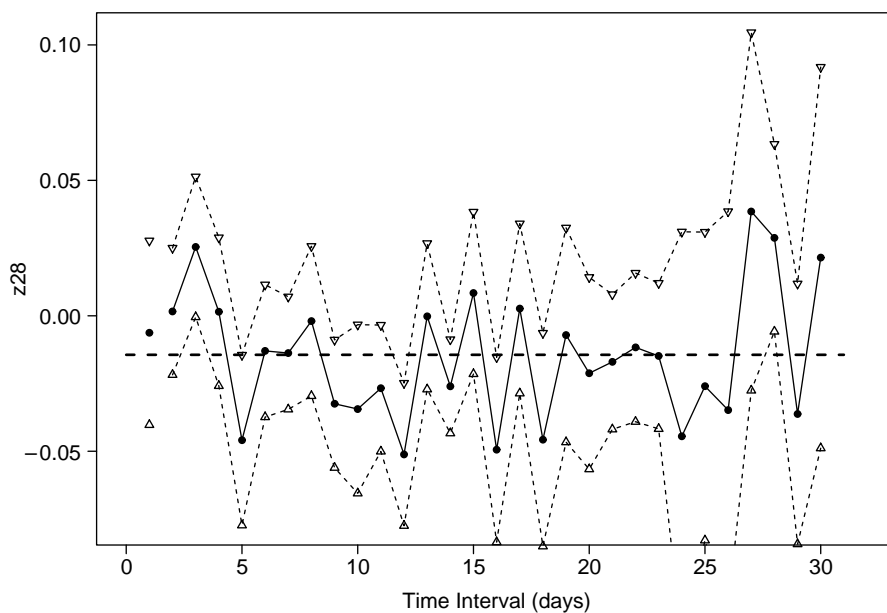

Figure S2.47. MLE of  $z_{28}$  by Time Interval Compared to Overall Mean ( $-0.0144$ ) for  $p = 2$  and  $f(t) = \sqrt{t}$ .

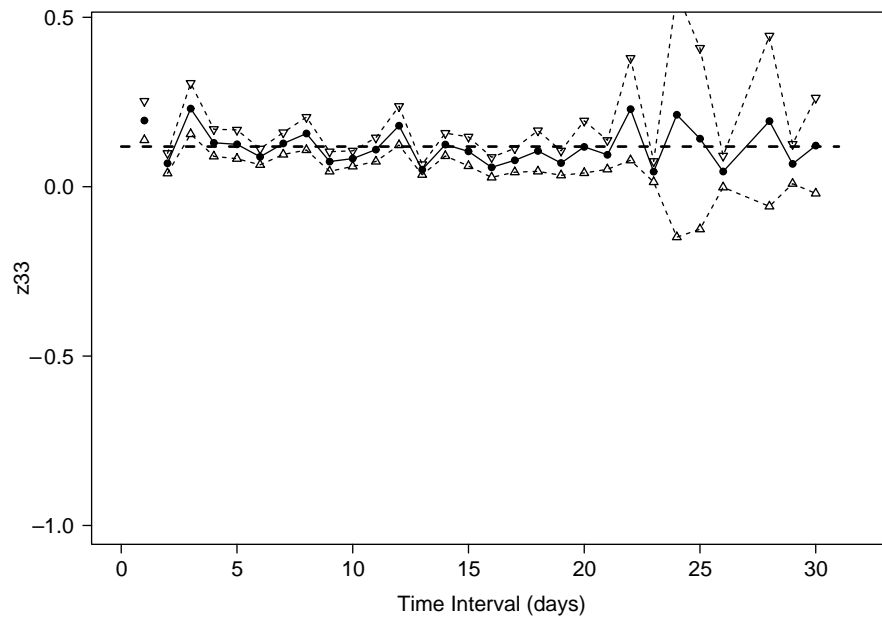

Figure S2.48. MLE of  $z_{33}$  by Time Interval Compared to Overall Mean (0.1185) for  $p = 2$  and  $f(t) = \sqrt{t}$ .

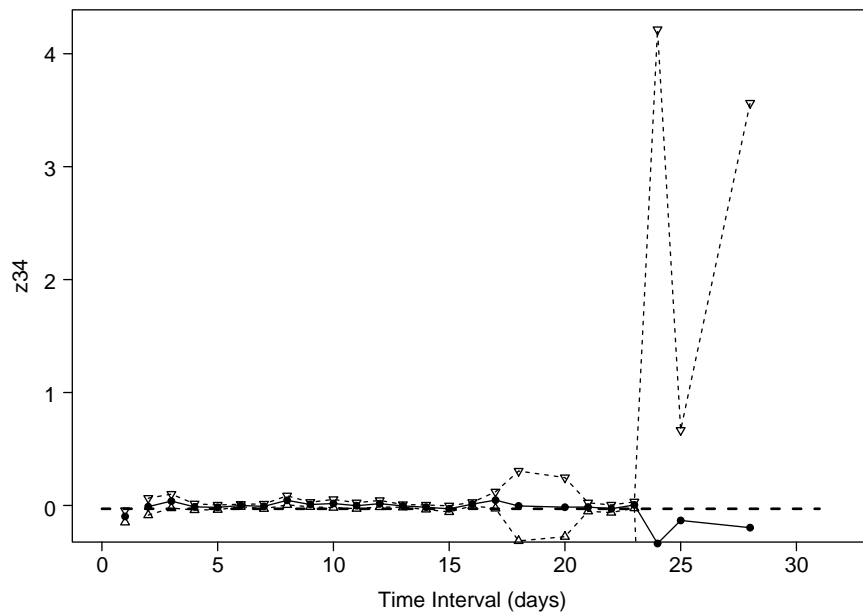

Figure S2.49. MLE of  $z_{34}$  by Time Interval Compared to Overall Mean (-0.0296) for  $p = 2$  and  $f(t) = \sqrt{t}$ .

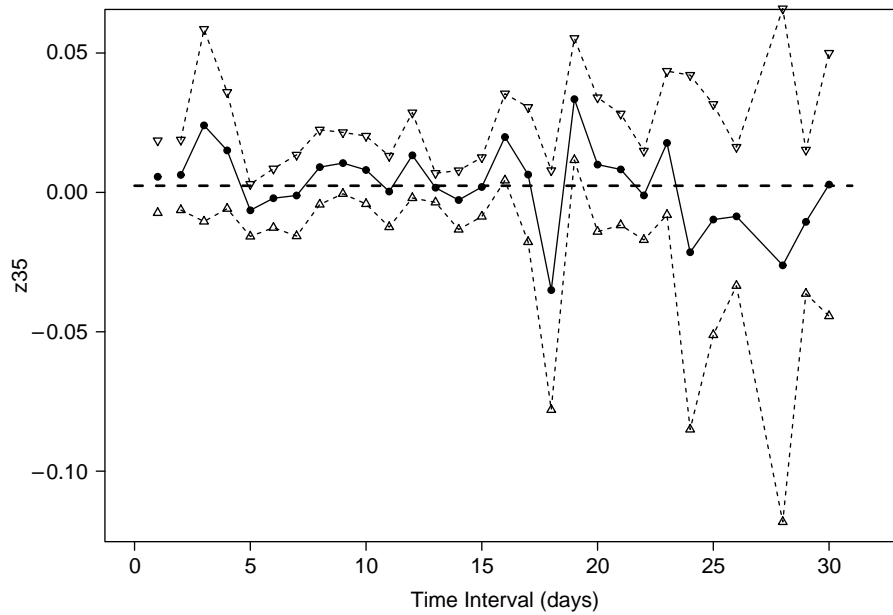

Figure S2.50. MLE of  $z_{35}$  by Time Interval Compared to Overall Mean (0.0024) for  $p = 2$  and  $f(t) = \sqrt{t}$ .

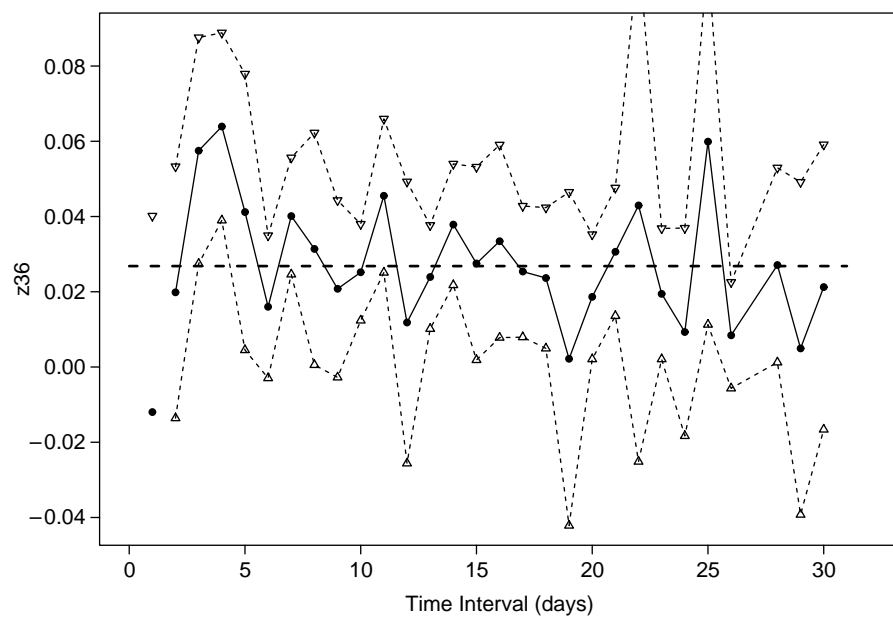

Figure S2.51. MLE of  $z_{36}$  by Time Interval Compared to Overall Mean (0.0268) for  $p = 2$  and  $f(t) = \sqrt{t}$ .

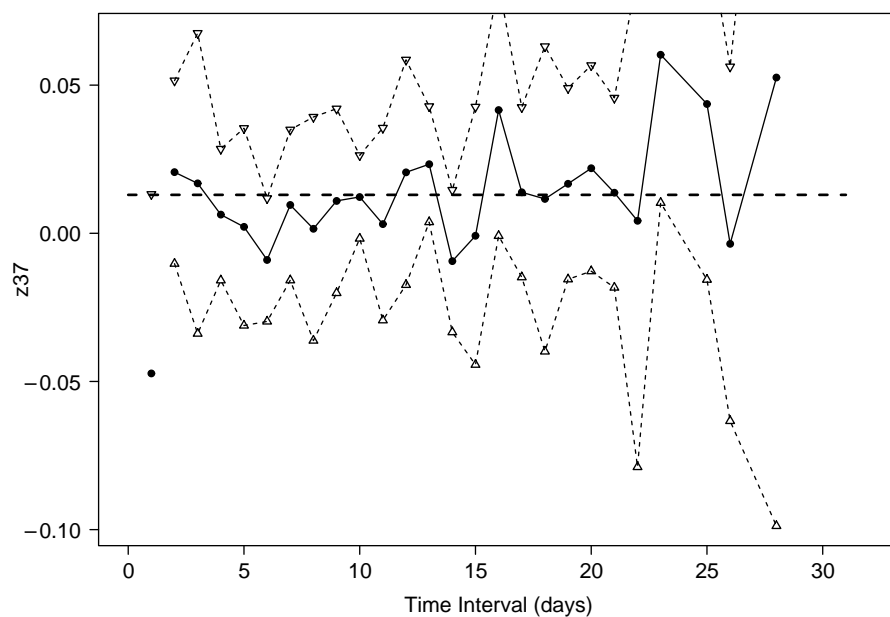

Figure S2.52. MLE of  $z_{37}$  by Time Interval Compared to Overall Mean (0.013) for  $p = 2$  and  $f(t) = \sqrt{t}$ .

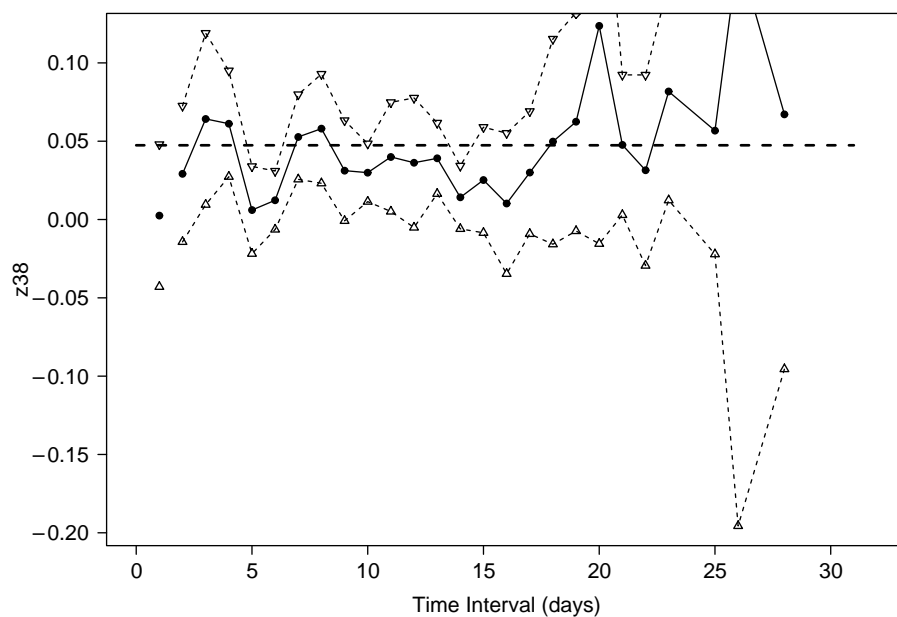

Figure S2.53. MLE of  $z_{38}$  by Time Interval Compared to Overall Mean (0.0474) for  $p = 2$  and  $f(t) = \sqrt{t}$ .



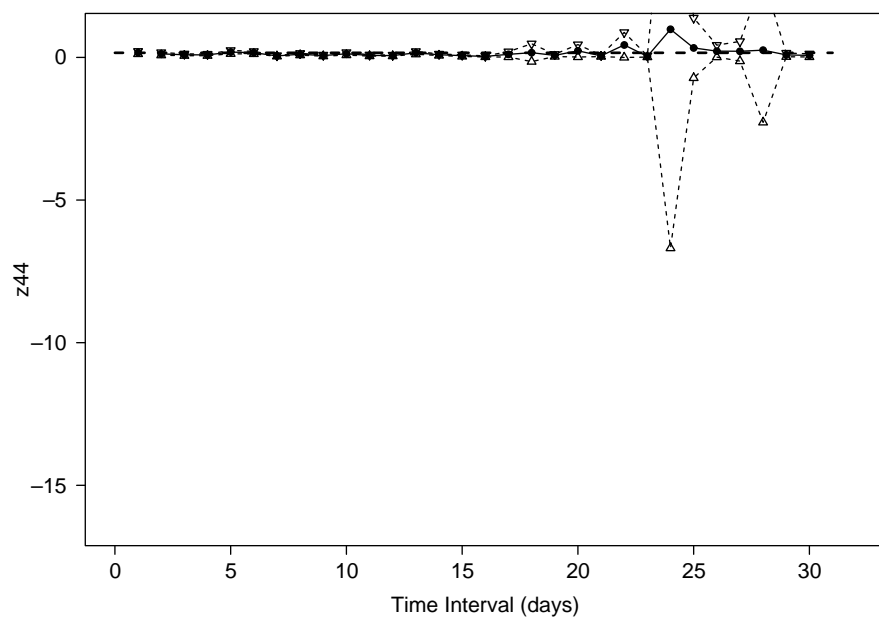

Figure S2.54. MLE of  $z_{44}$  by Time Interval Compared to Overall Mean (0.1615) for  $p = 2$  and  $f(t) = \sqrt{t}$ .

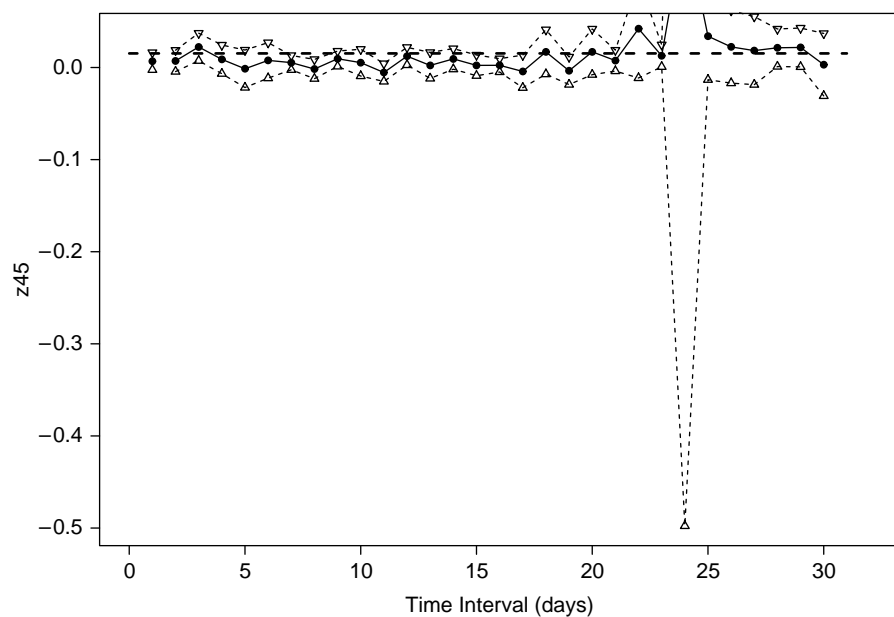

Figure S2.55. MLE of  $z_{45}$  by Time Interval Compared to Overall Mean (0.0153) for  $p = 2$  and  $f(t) = \sqrt{t}$ .

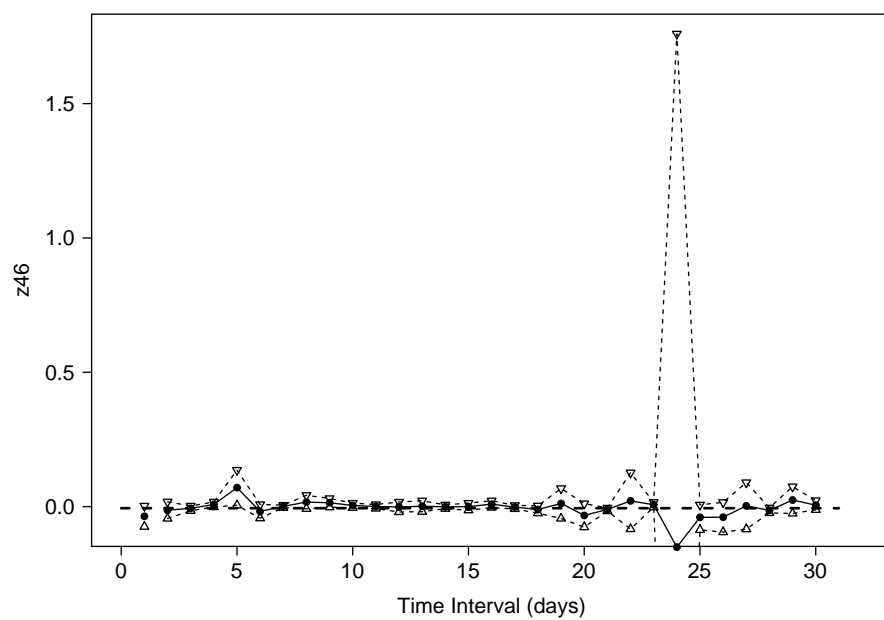

Figure S2.56. MLE of  $z_{46}$  by Time Interval Compared to Overall Mean ( $-0.0059$ ) for  $p = 2$  and  $f(t) = \sqrt{t}$ .

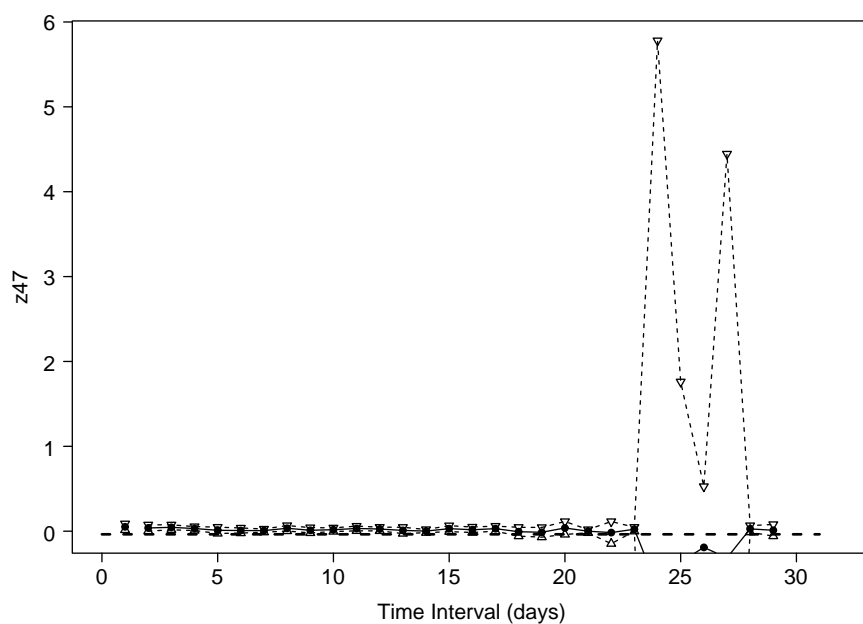

Figure S2.57. MLE of  $z_{47}$  by Time Interval Compared to Overall Mean ( $-0.0368$ ) for  $p = 2$  and  $f(t) = \sqrt{t}$ .

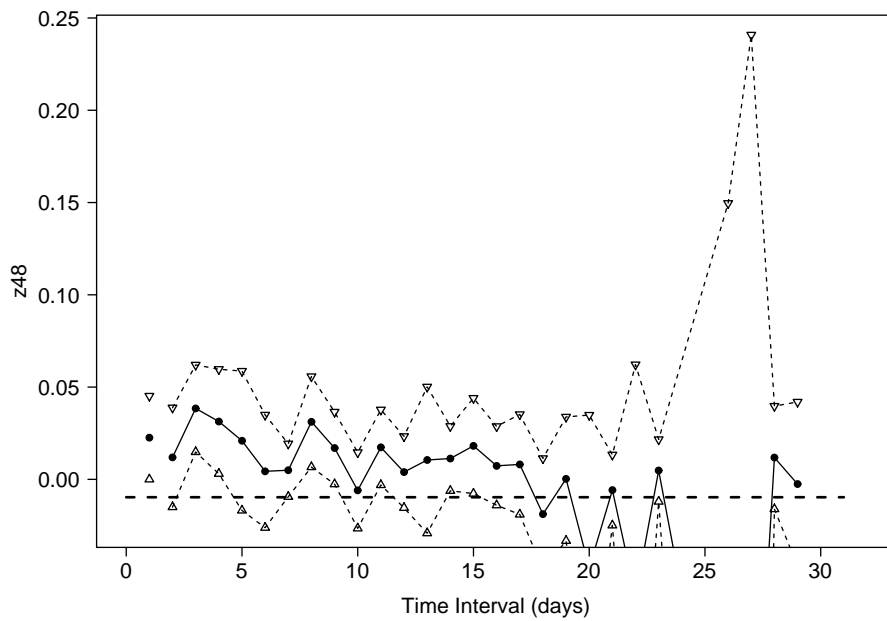

Figure S2.58. MLE of  $z_{48}$  by Time Interval Compared to Overall Mean ( $-0.0097$ ) for  $p = 2$  and  $f(t) = \sqrt{t}$ .

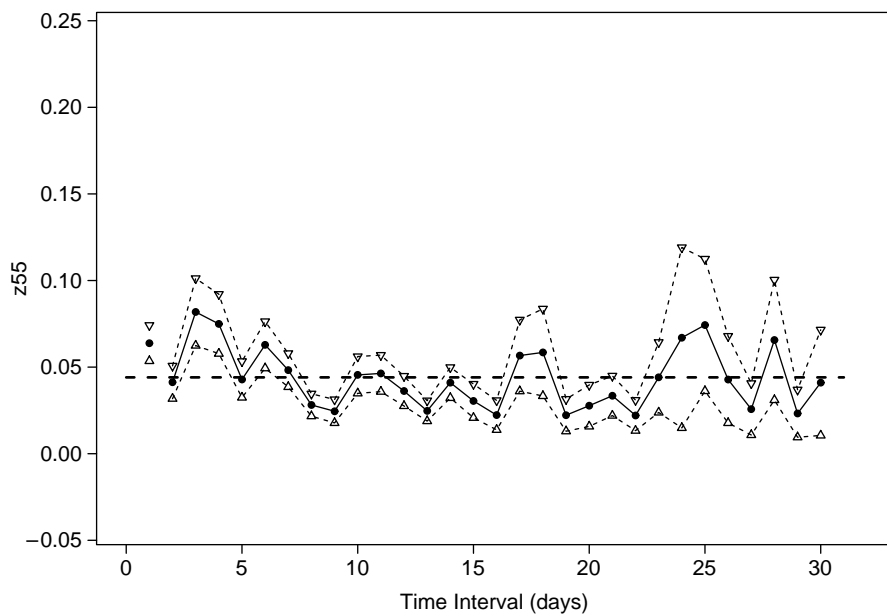

Figure S2.59. MLE of  $z_{55}$  by Time Interval Compared to Overall Mean ( $0.0441$ ) for  $p = 2$  and  $f(t) = \sqrt{t}$ .

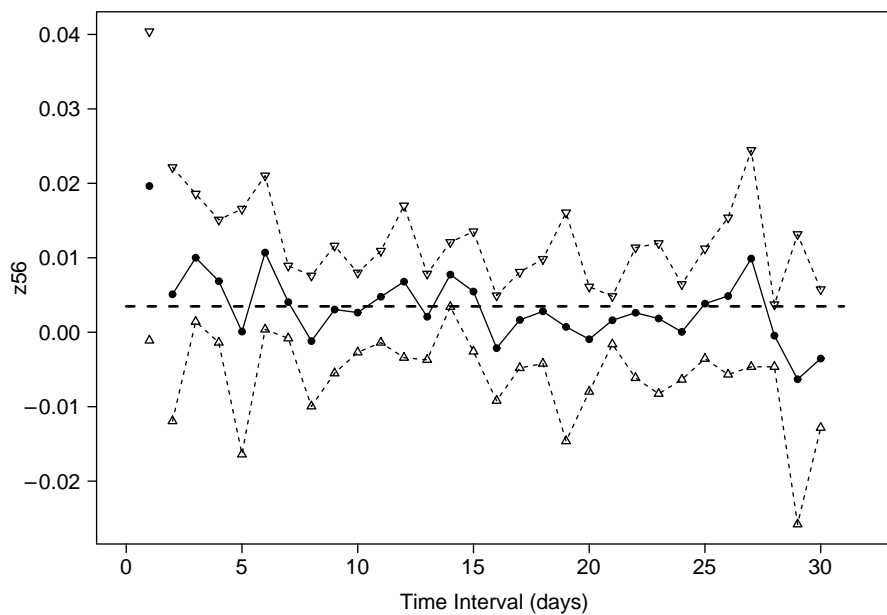

Figure S2.60. MLE of  $z_{56}$  by Time Interval Compared to Overall Mean (0.0035) for  $p = 2$  and  $f(t) = \sqrt{t}$ .

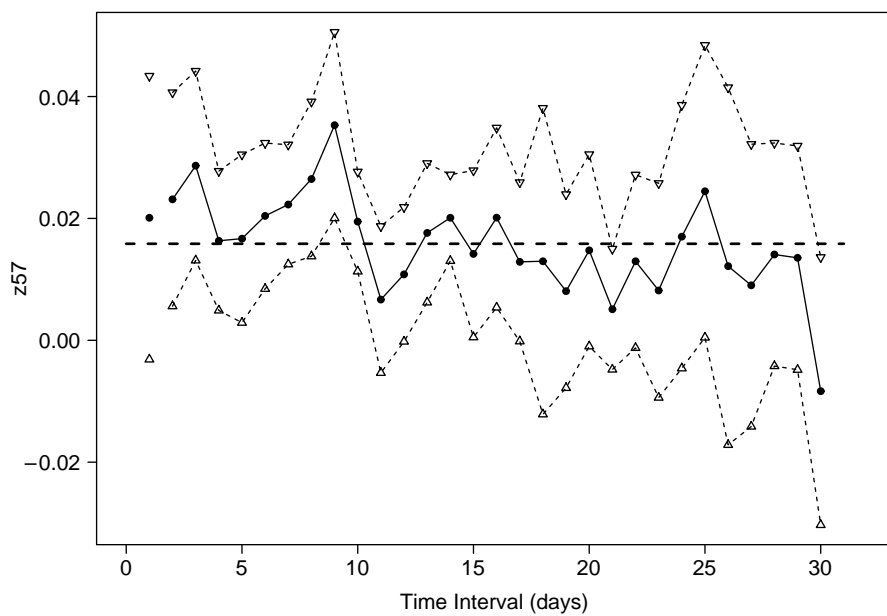

Figure S2.61. MLE of  $z_{57}$  by Time Interval Compared to Overall Mean (0.0158) for  $p = 2$  and  $f(t) = \sqrt{t}$ .

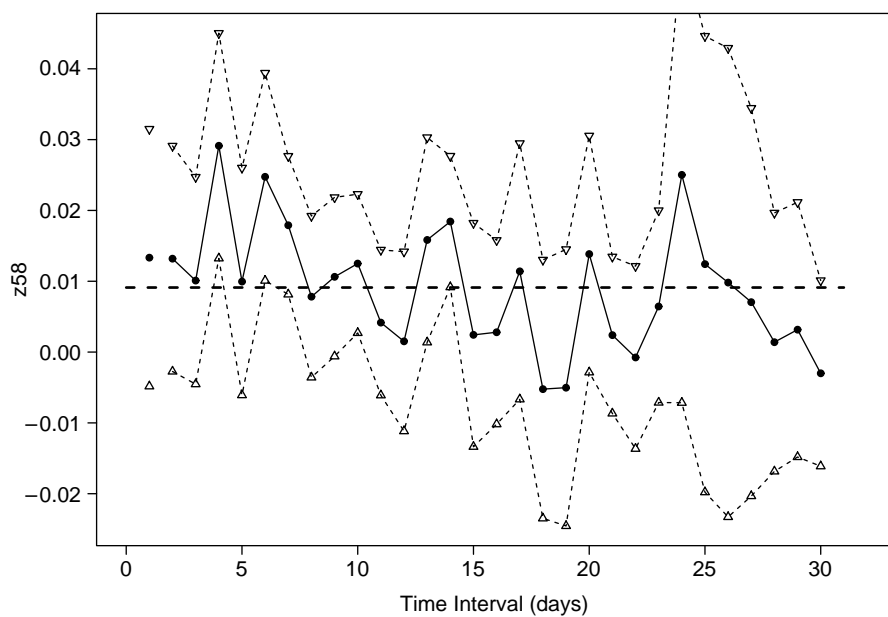

Figure S2.62. MLE of  $z_{58}$  by Time Interval Compared to Overall Mean (0.0091) for  $p = 2$  and  $f(t) = \sqrt{t}$ .

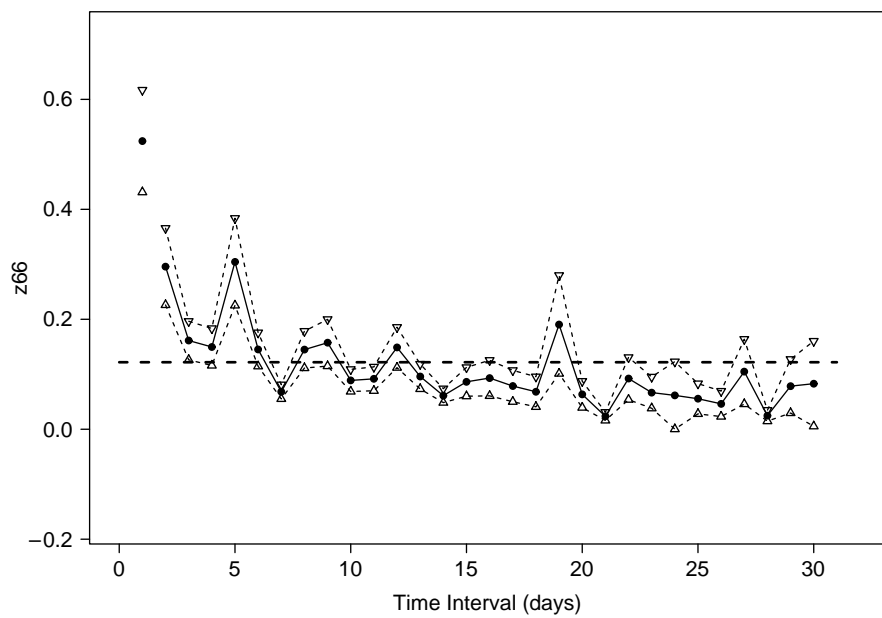

Figure S2.63. MLE of  $z_{66}$  by Time Interval Compared to Overall Mean (0.1219) for  $p = 2$  and  $f(t) = \sqrt{t}$ .

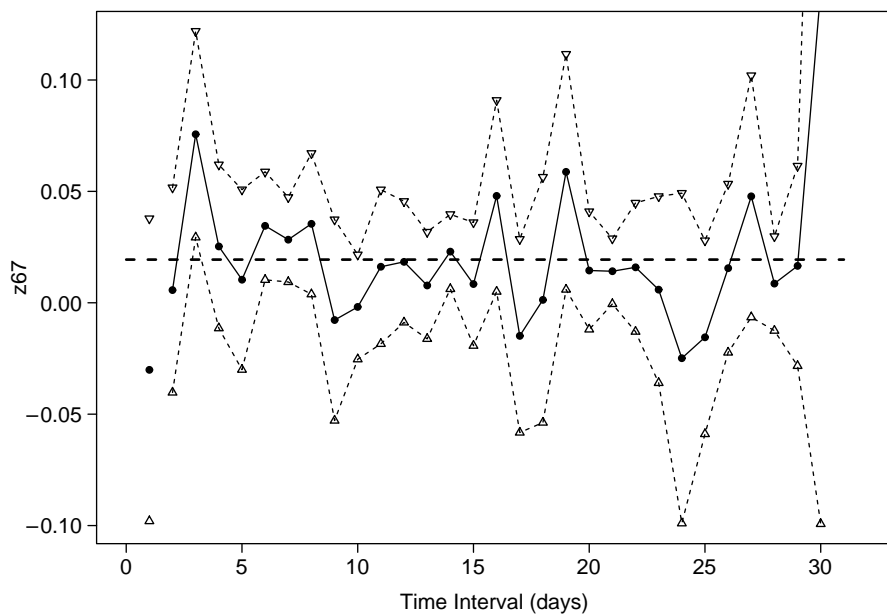

Figure S2.64. MLE of  $z_{67}$  by Time Interval Compared to Overall Mean (0.0194) for  $p = 2$  and  $f(t) = \sqrt{t}$ .

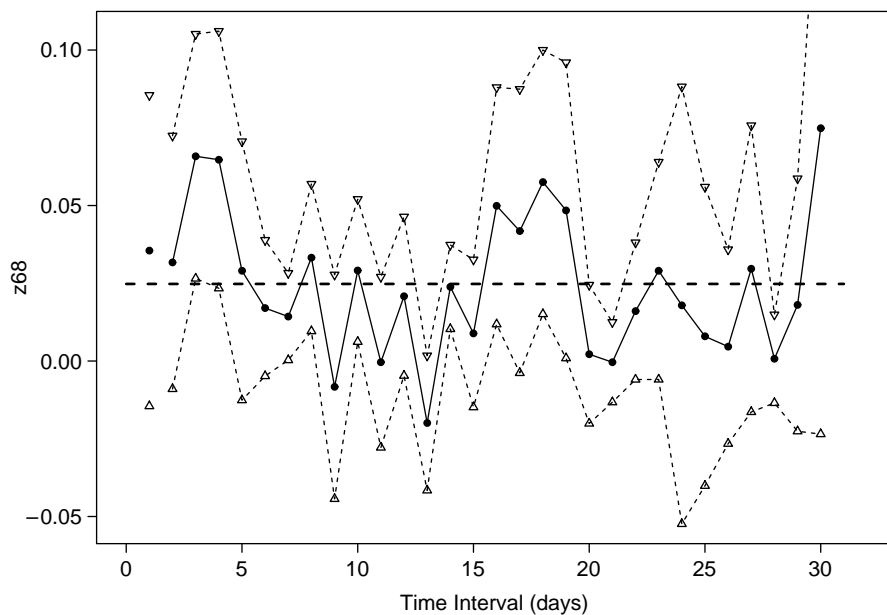

Figure S2.65. MLE of  $z_{68}$  by Time Interval Compared to Overall Mean (0.0248) for  $p = 2$  and  $f(t) = \sqrt{t}$ .

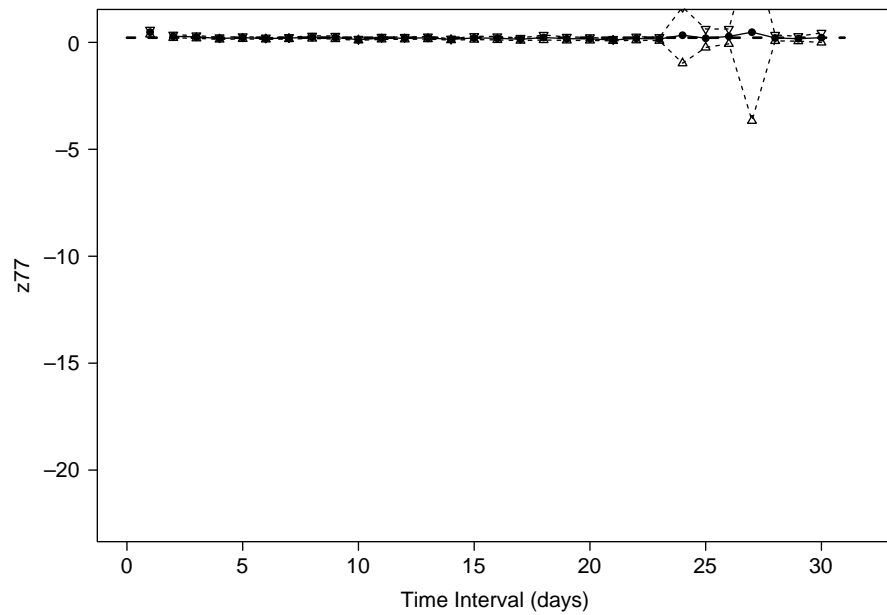

Figure S2.66. MLE of  $z_{77}$  by Time Interval Compared to Overall Mean (0.2183) for  $p = 2$  and  $f(t) = \sqrt{t}$ .

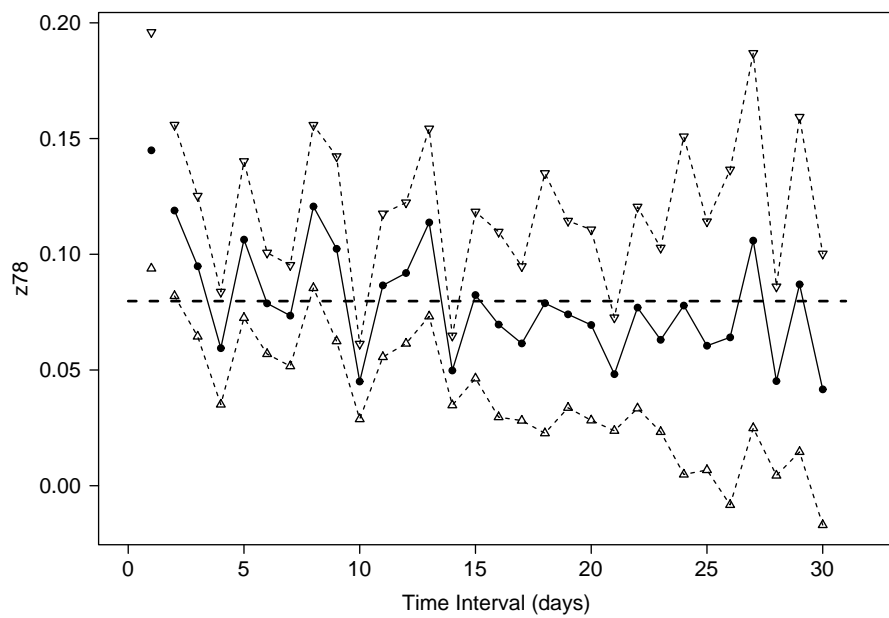

Figure S2.67. MLE of  $z_{78}$  by Time Interval Compared to Overall Mean (0.0798) for  $p = 2$  and  $f(t) = \sqrt{t}$ .

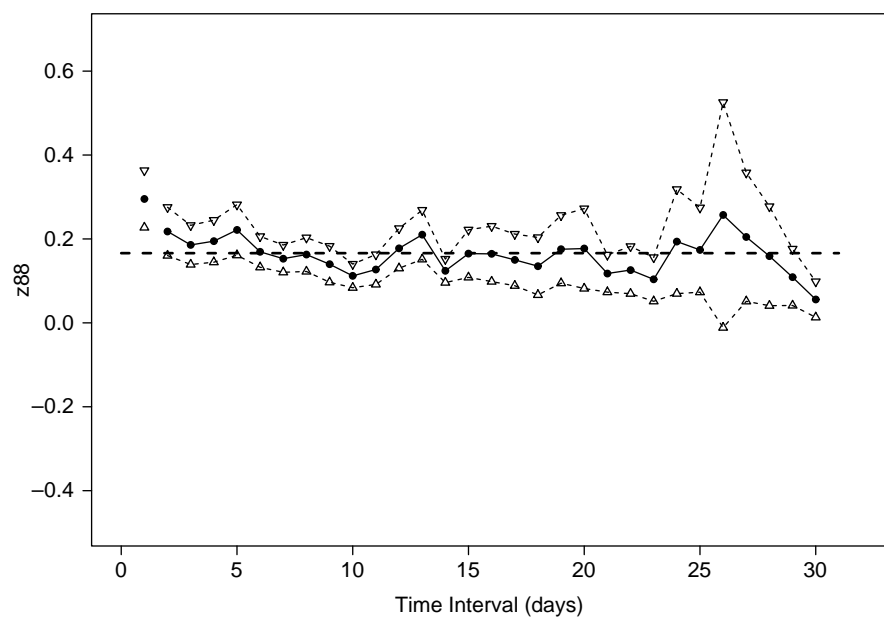

Figure S2.68. MLE of  $z_{88}$  by Time Interval Compared to Overall Mean (0.1661) for  $p = 2$  and  $f(t) = \sqrt{t}$ .

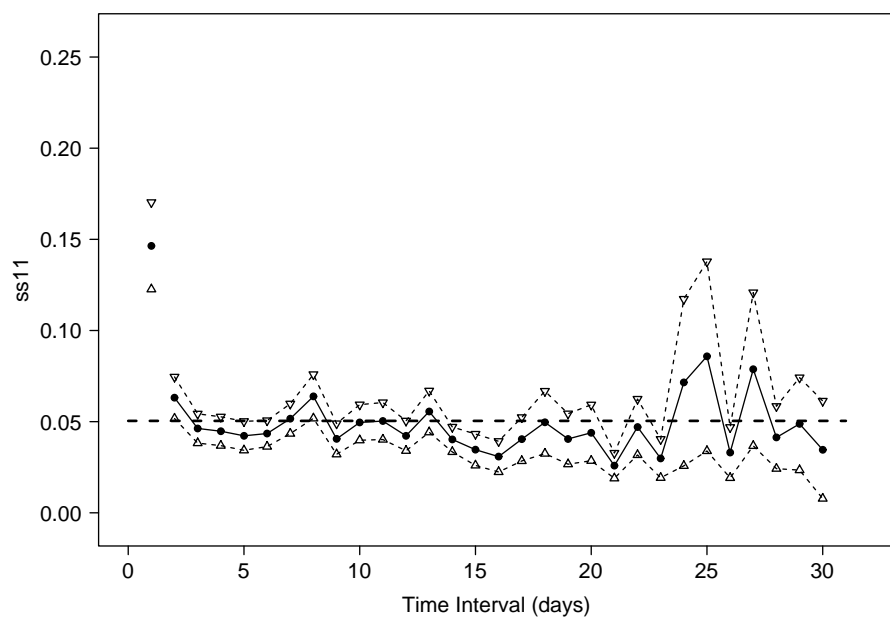

Figure S2.69. MLE of  $ss_{11}$  by Time Interval Compared to Overall Mean (0.0504) for  $p = 2$  and  $f(t) = \sqrt{t}$ .



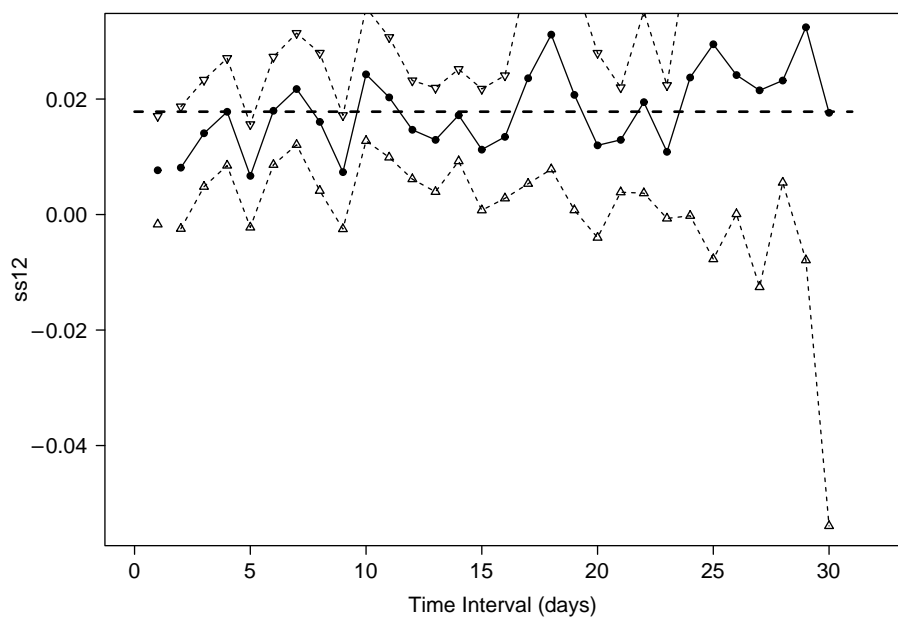

Figure S2.70. MLE of  $ss_{12}$  by Time Interval Compared to Overall Mean (0.0178) for  $p = 2$  and  $f(t) = \sqrt{t}$ .

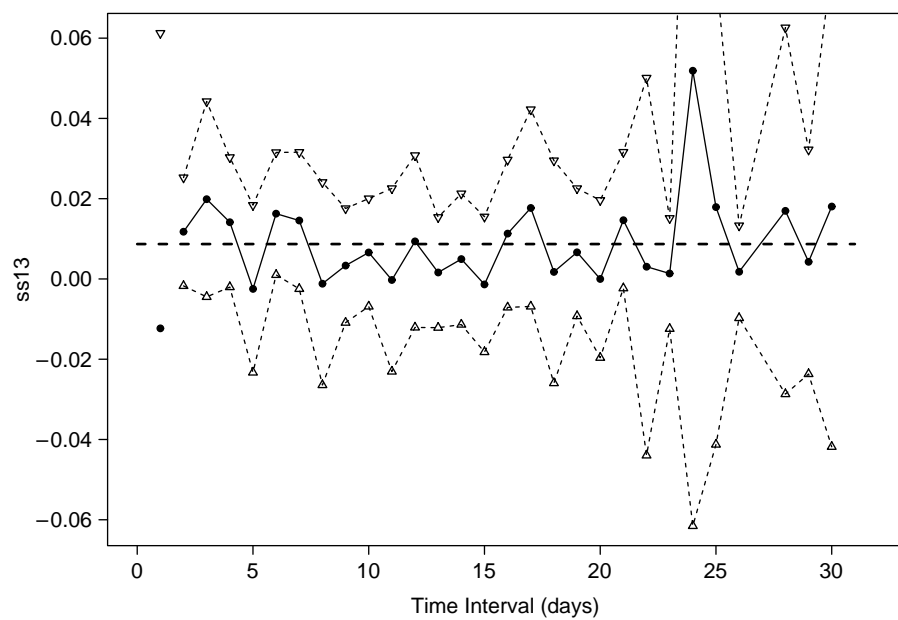

Figure S2.71. MLE of  $ss_{13}$  by Time Interval Compared to Overall Mean (0.0087) for  $p = 2$  and  $f(t) = \sqrt{t}$ .

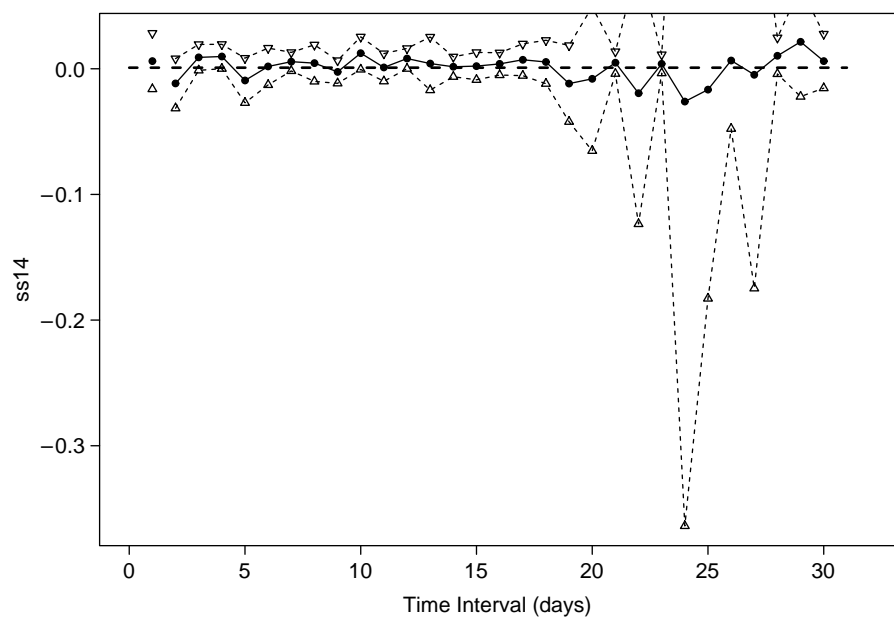

Figure S2.72. MLE of  $ss14$  by Time Interval Compared to Overall Mean ( $9e-04$ ) for  $p = 2$  and  $f(t) = \sqrt{t}$ .

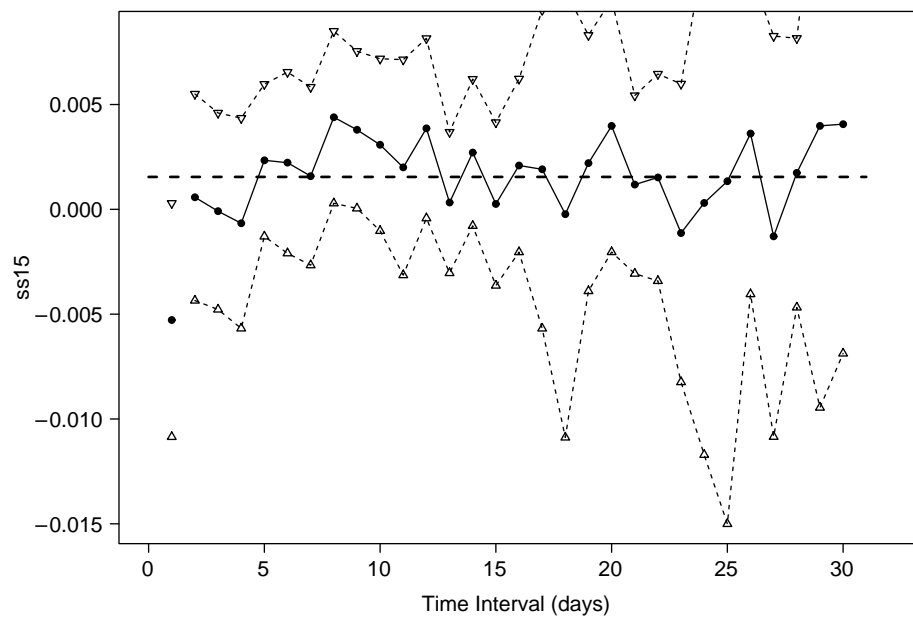

Figure S2.73. MLE of  $ss15$  by Time Interval Compared to Overall Mean ( $0.0015$ ) for  $p = 2$  and  $f(t) = \sqrt{t}$ .

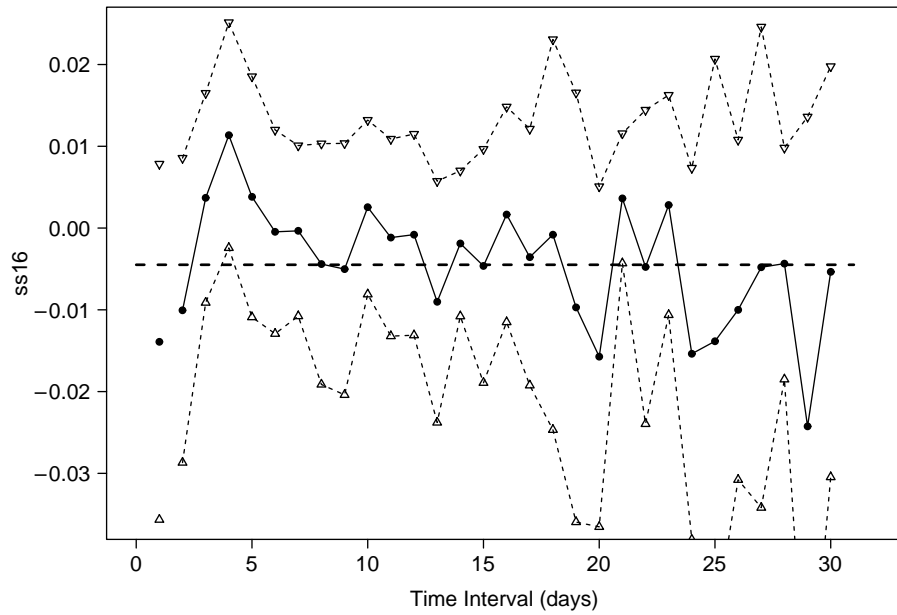

Figure S2.74. MLE of  $ss16$  by Time Interval Compared to Overall Mean ( $-0.0045$ ) for  $p = 2$  and  $f(t) = \sqrt{t}$ .

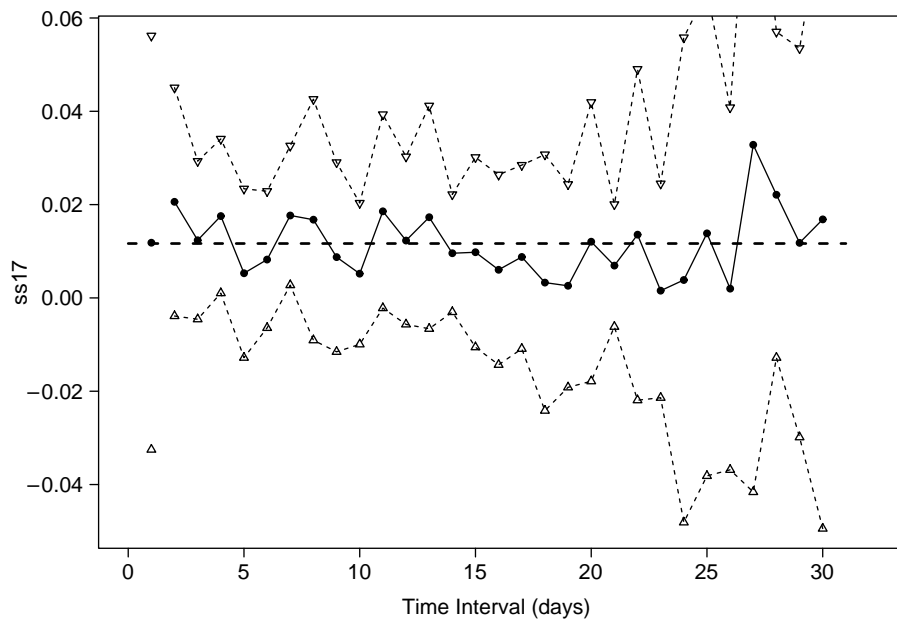

Figure S2.75. MLE of  $ss17$  by Time Interval Compared to Overall Mean ( $0.0117$ ) for  $p = 2$  and  $f(t) = \sqrt{t}$ .

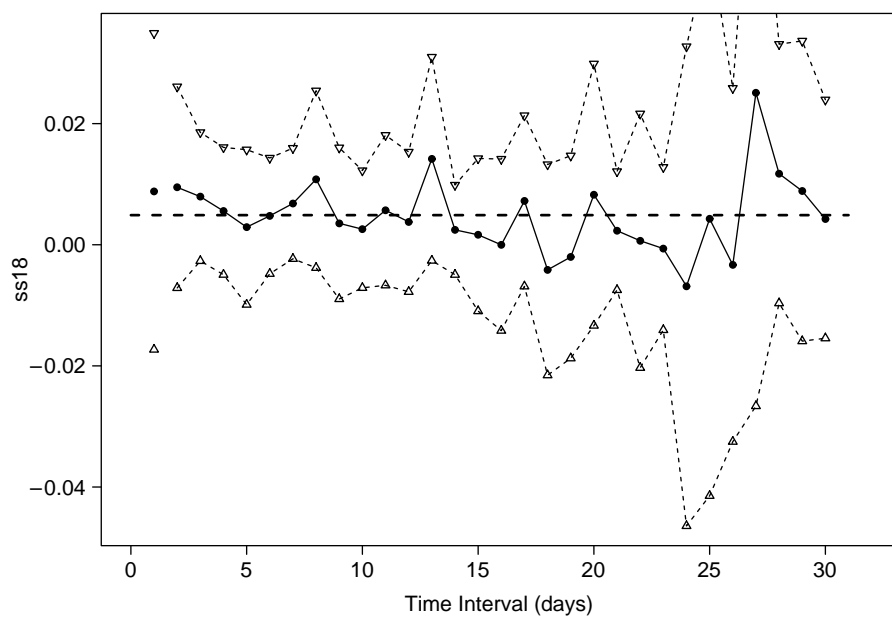

Figure S2.76. MLE of ss18 by Time Interval Compared to Overall Mean (0.0049) for  $p = 2$  and  $f(t) = \sqrt{t}$ .

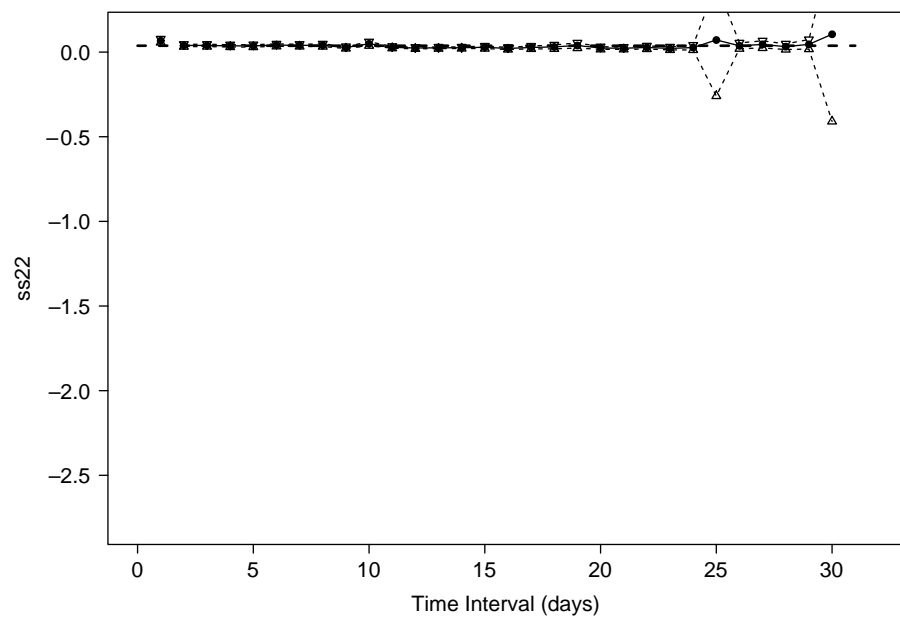

Figure S2.77. MLE of ss22 by Time Interval Compared to Overall Mean (0.0376) for  $p = 2$  and  $f(t) = \sqrt{t}$ .

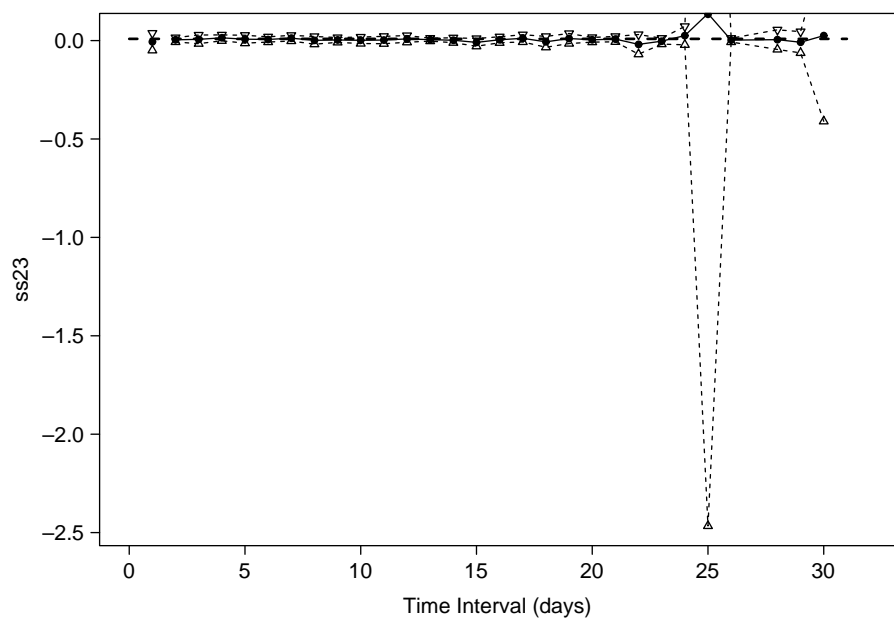

Figure S2.78. MLE of  $ss_{23}$  by Time Interval Compared to Overall Mean (0.0087) for  $p = 2$  and  $f(t) = \sqrt{t}$ .

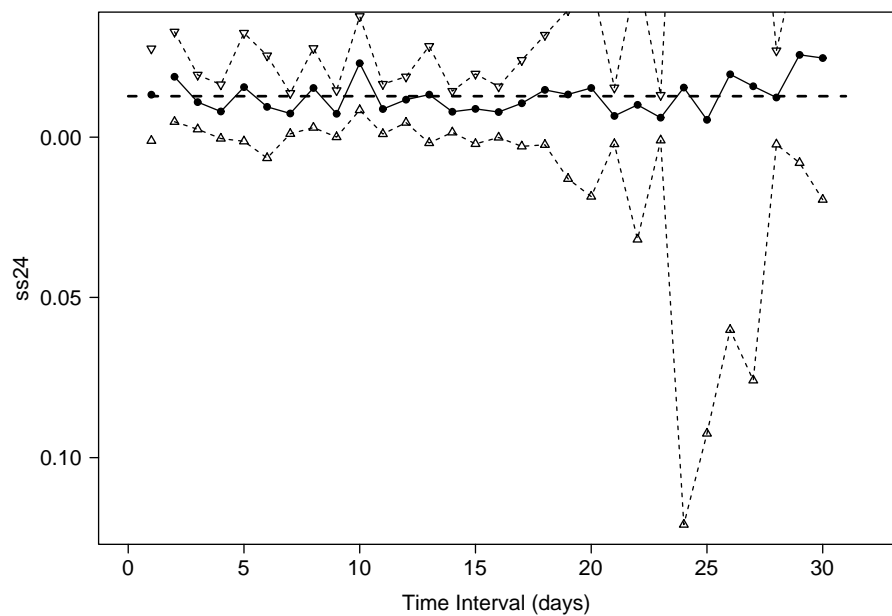

Figure S2.79. MLE of  $ss_{24}$  by Time Interval Compared to Overall Mean (0.0128) for  $p = 2$  and  $f(t) = \sqrt{t}$ .

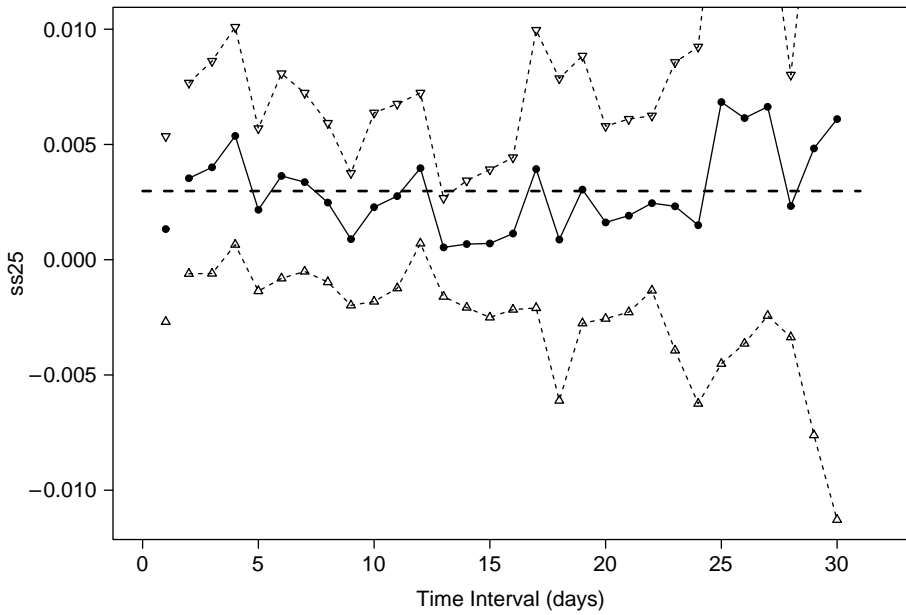

Figure S2.80. MLE of  $ss_{25}$  by Time Interval Compared to Overall Mean (0.003) for  $p = 2$  and  $f(t) = \sqrt{t}$ .

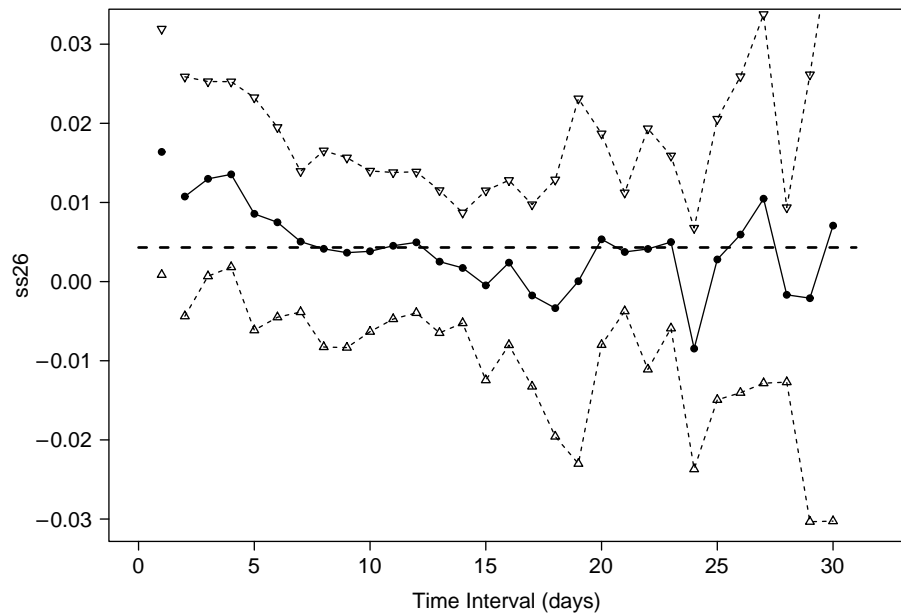

Figure S2.81. MLE of  $ss_{26}$  by Time Interval Compared to Overall Mean (0.0043) for  $p = 2$  and  $f(t) = \sqrt{t}$ .

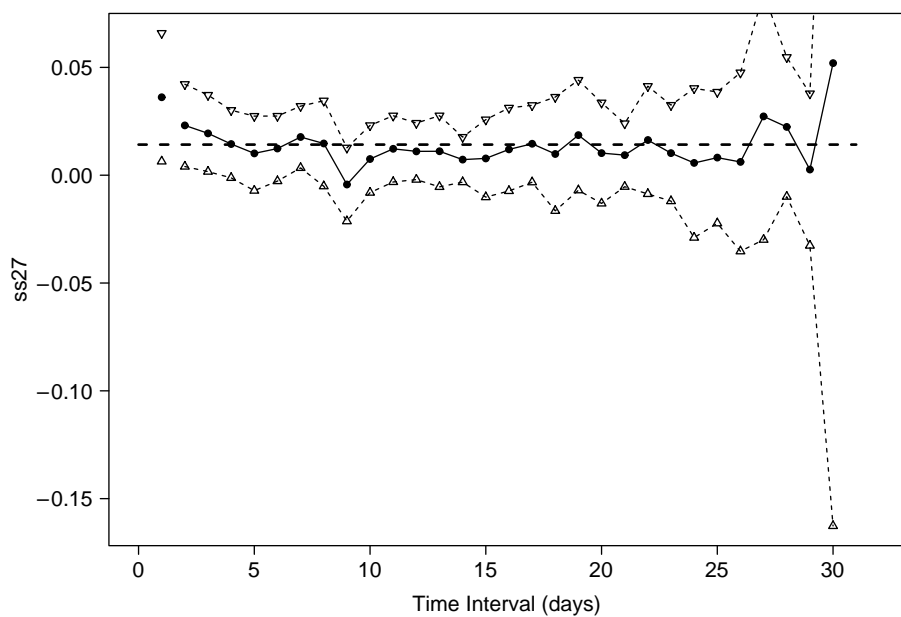

Figure S2.82. MLE of  $ss_{27}$  by Time Interval Compared to Overall Mean (0.0142) for  $p = 2$  and  $f(t) = \sqrt{t}$ .

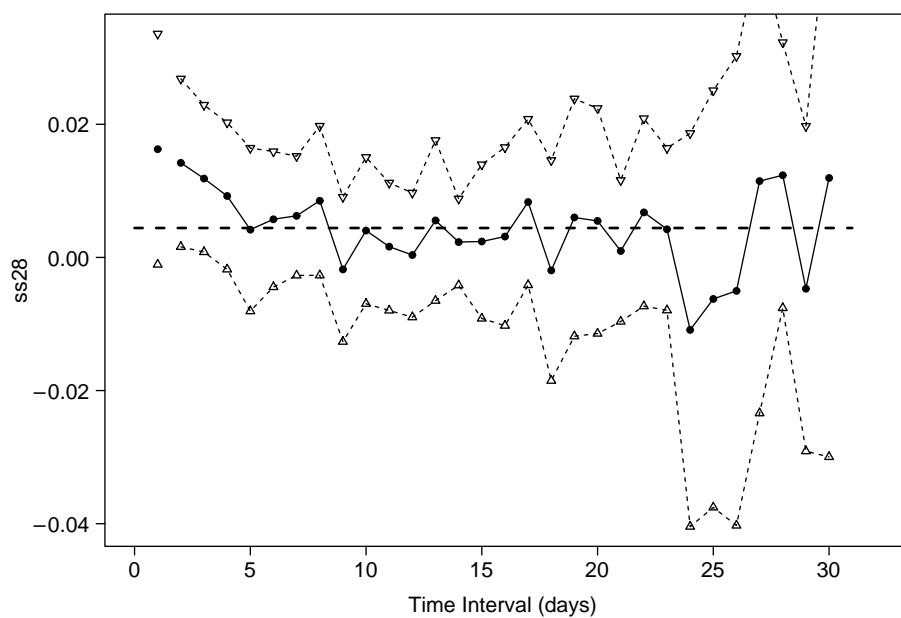

Figure S2.83. MLE of  $ss_{28}$  by Time Interval Compared to Overall Mean (0.0044) for  $p = 2$  and  $f(t) = \sqrt{t}$ .

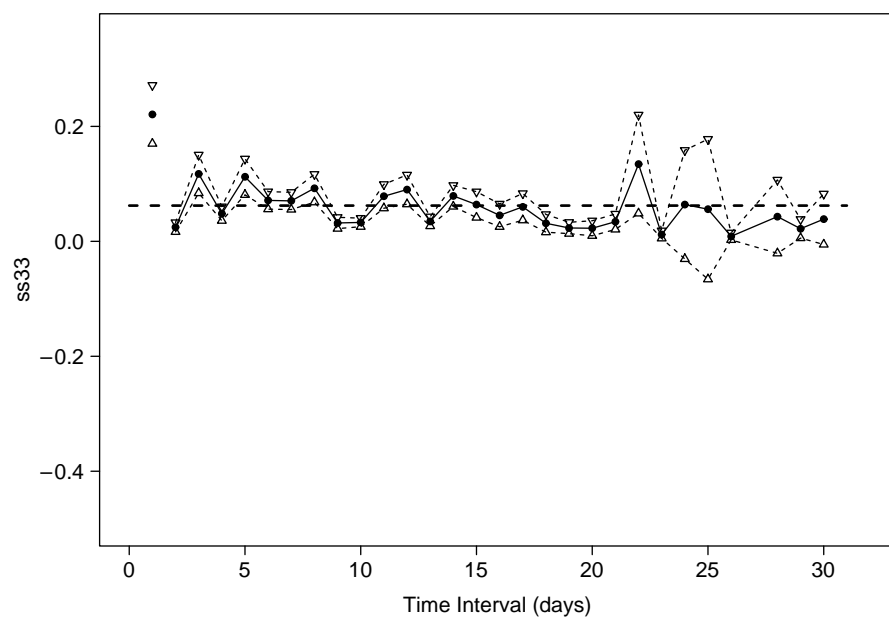

Figure S2.84. MLE of  $ss_{33}$  by Time Interval Compared to Overall Mean (0.0622) for  $p = 2$  and  $f(t) = \sqrt{t}$ .

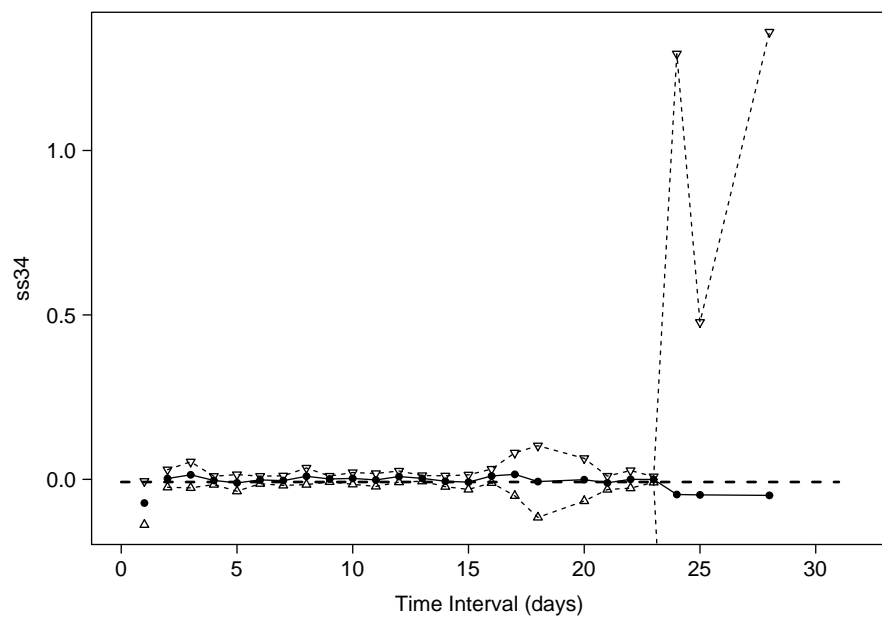

Figure S2.85. MLE of  $ss_{34}$  by Time Interval Compared to Overall Mean ( $-0.008$ ) for  $p = 2$  and  $f(t) = \sqrt{t}$ .



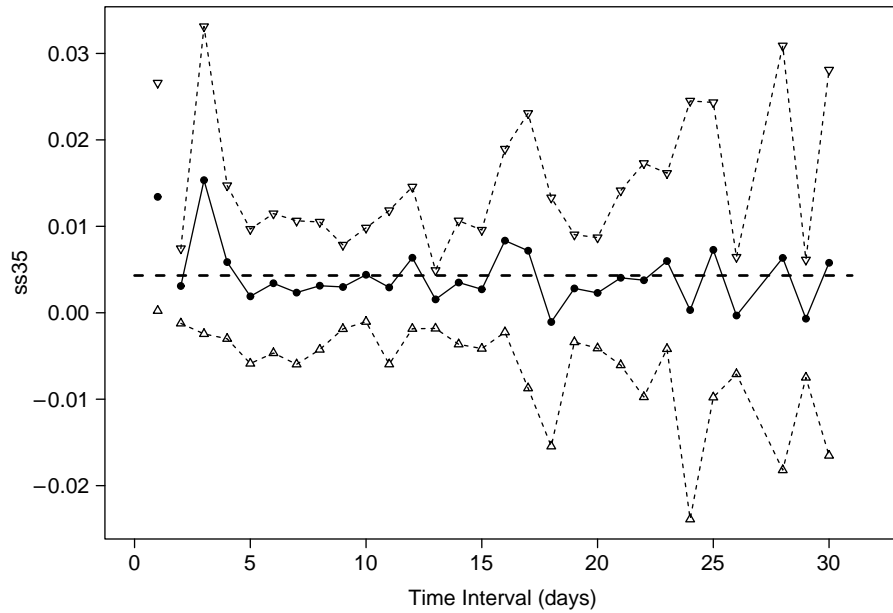

Figure S2.86. MLE of  $ss_{35}$  by Time Interval Compared to Overall Mean (0.0043) for  $p = 2$  and  $f(t) = \sqrt{t}$ .

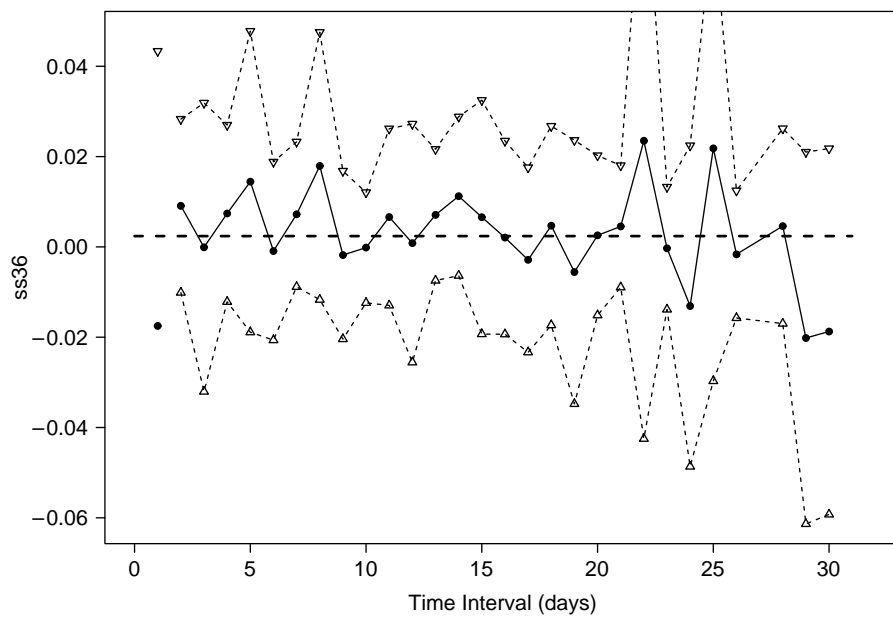

Figure S2.87. MLE of  $ss_{36}$  by Time Interval Compared to Overall Mean (0.0024) for  $p = 2$  and  $f(t) = \sqrt{t}$ .

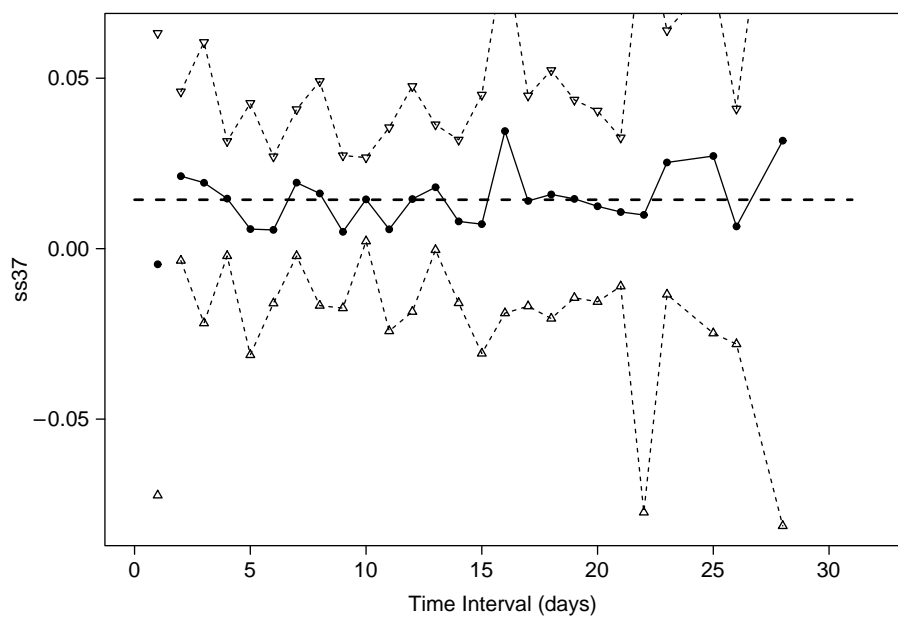

Figure S2.88. MLE of  $ss_{37}$  by Time Interval Compared to Overall Mean (0.0143) for  $p = 2$  and  $f(t) = \sqrt{t}$ .

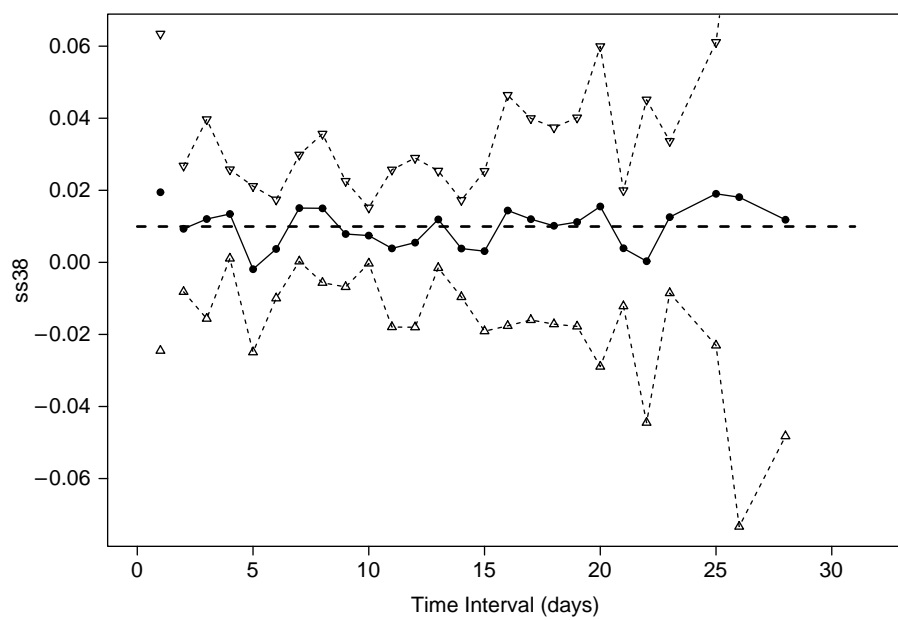

Figure S2.89. MLE of  $ss_{38}$  by Time Interval Compared to Overall Mean (0.0099) for  $p = 2$  and  $f(t) = \sqrt{t}$ .

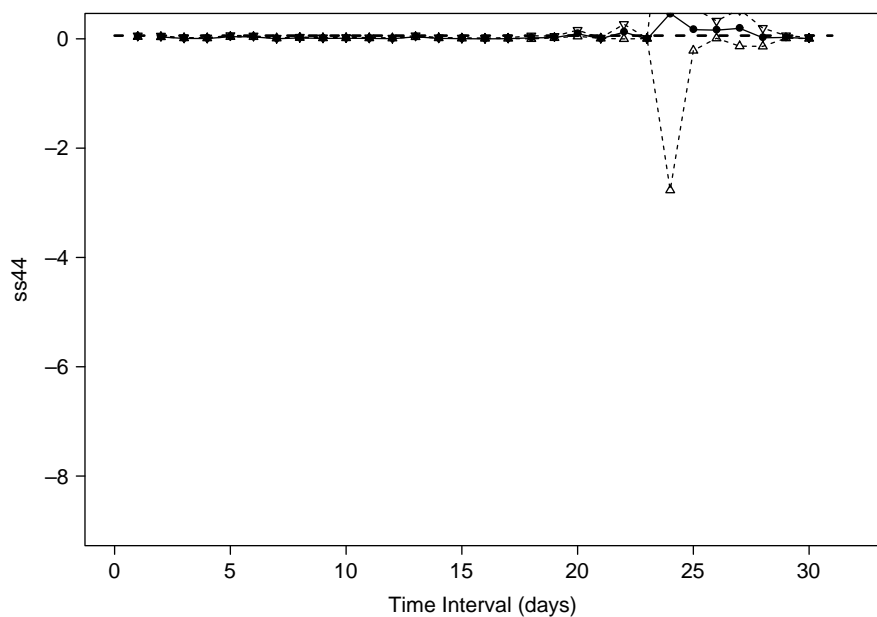

Figure S2.90. MLE of  $ss_{44}$  by Time Interval Compared to Overall Mean (0.0589) for  $p = 2$  and  $f(t) = \sqrt{t}$ .

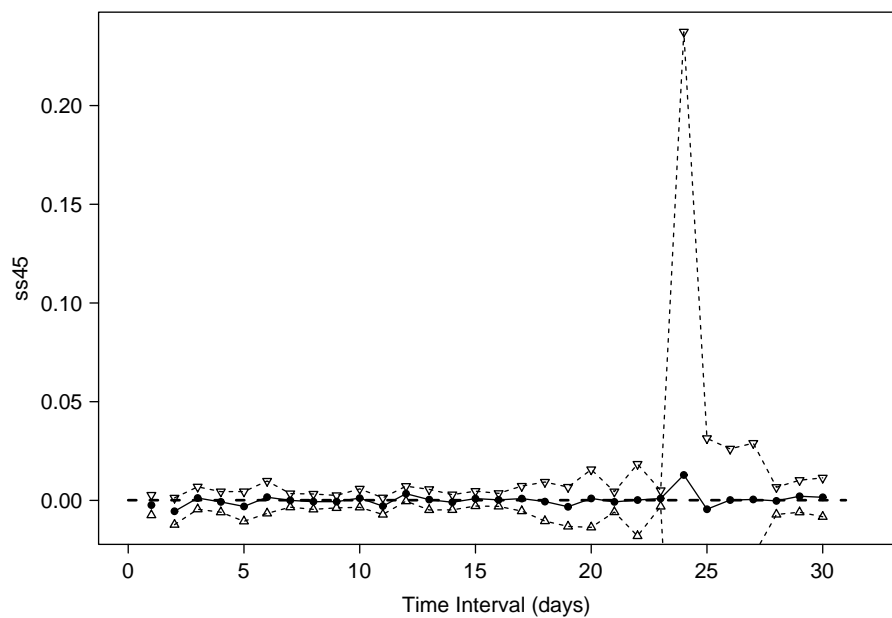

Figure S2.91. MLE of  $ss_{45}$  by Time Interval Compared to Overall Mean ( $1e-04$ ) for  $p = 2$  and  $f(t) = \sqrt{t}$ .

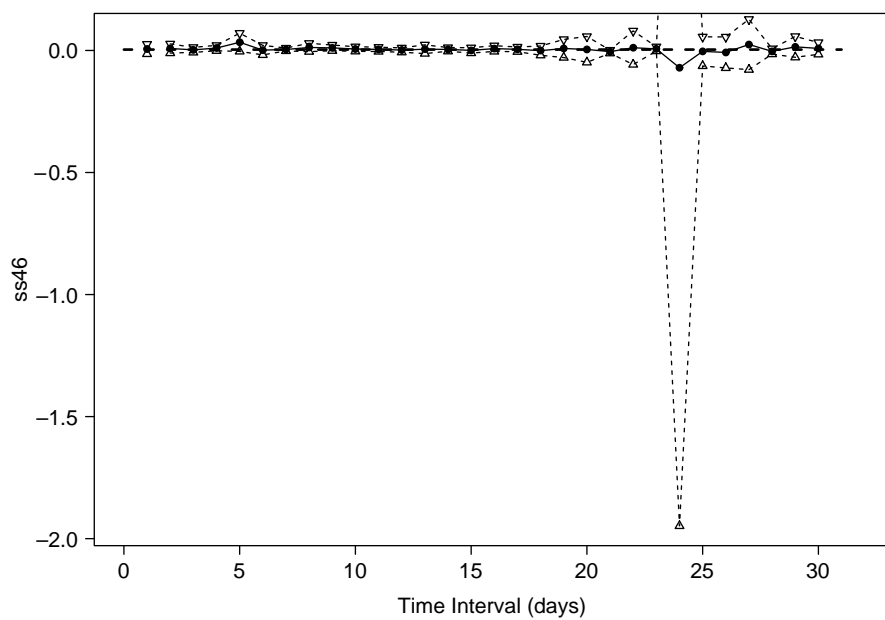

Figure S2.92. MLE of  $ss_{46}$  by Time Interval Compared to Overall Mean (0.0036) for  $p = 2$  and  $f(t) = \sqrt{t}$ .

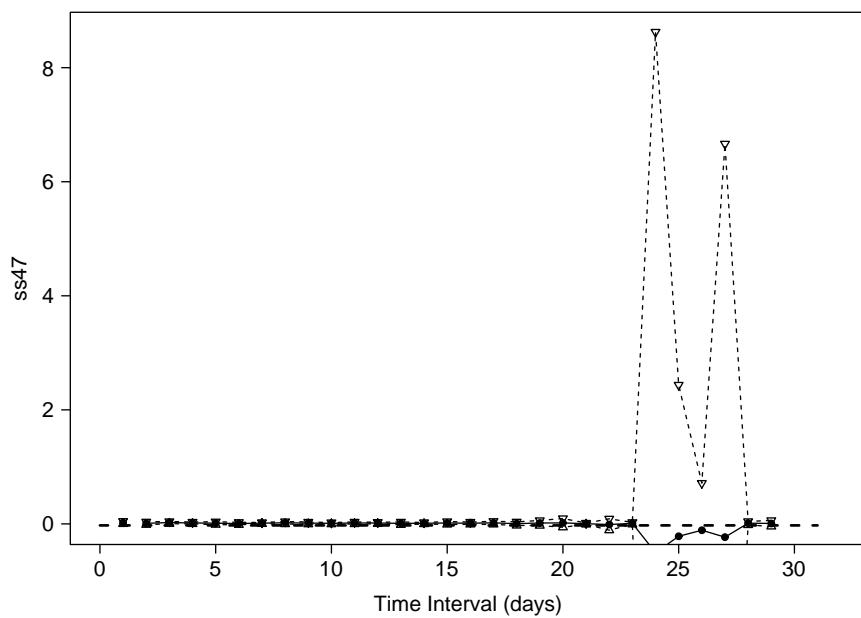

Figure S2.93. MLE of  $ss_{47}$  by Time Interval Compared to Overall Mean ( $-0.0262$ ) for  $p = 2$  and  $f(t) = \sqrt{t}$ .

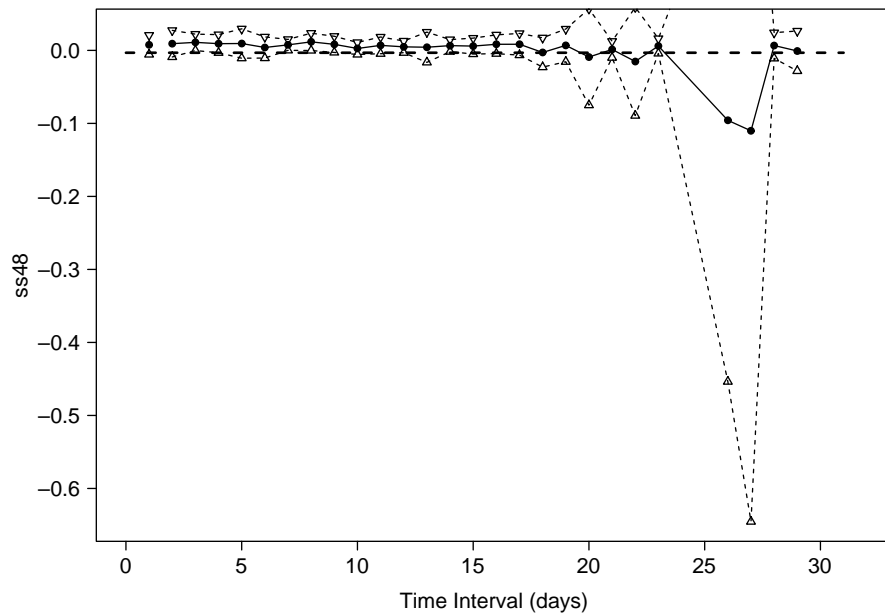

Figure S2.94. MLE of  $ss_{48}$  by Time Interval Compared to Overall Mean ( $-0.0032$ ) for  $p = 2$  and  $f(t) = \sqrt{t}$ .

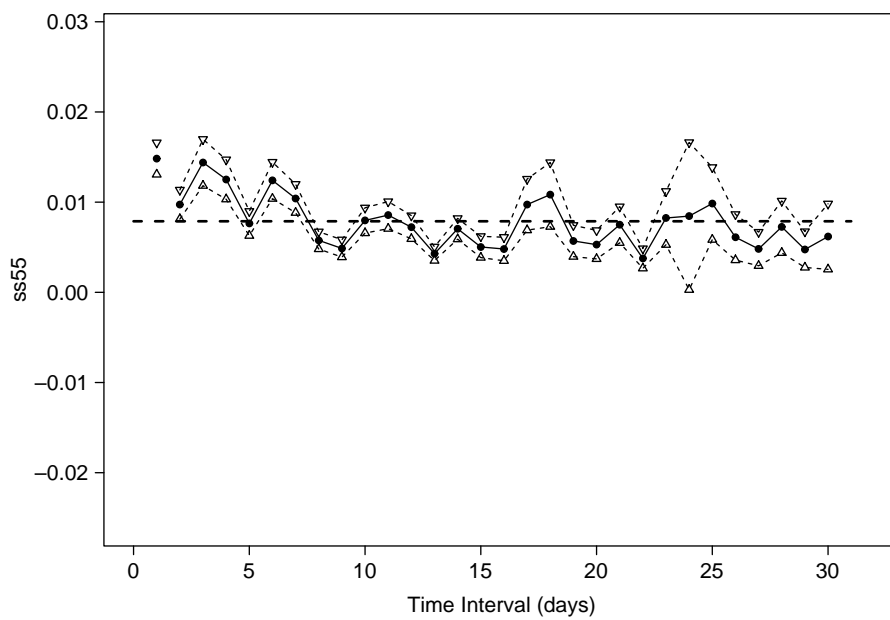

Figure S2.95. MLE of  $ss_{55}$  by Time Interval Compared to Overall Mean ( $0.0079$ ) for  $p = 2$  and  $f(t) = \sqrt{t}$ .

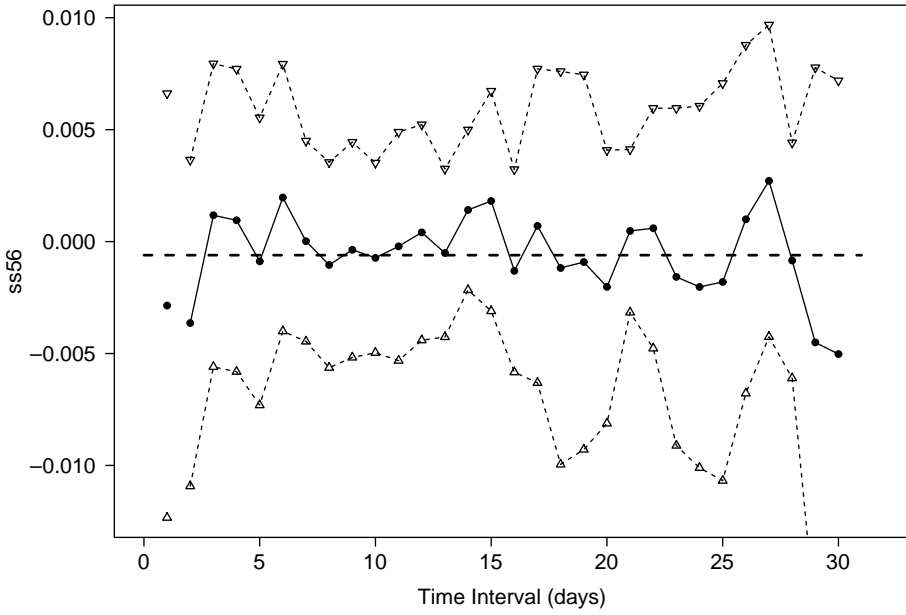

Figure S2.96. MLE of ss56 by Time Interval Compared to Overall Mean ( $-6e-04$ ) for  $p = 2$  and  $f(t) = \sqrt{t}$ .

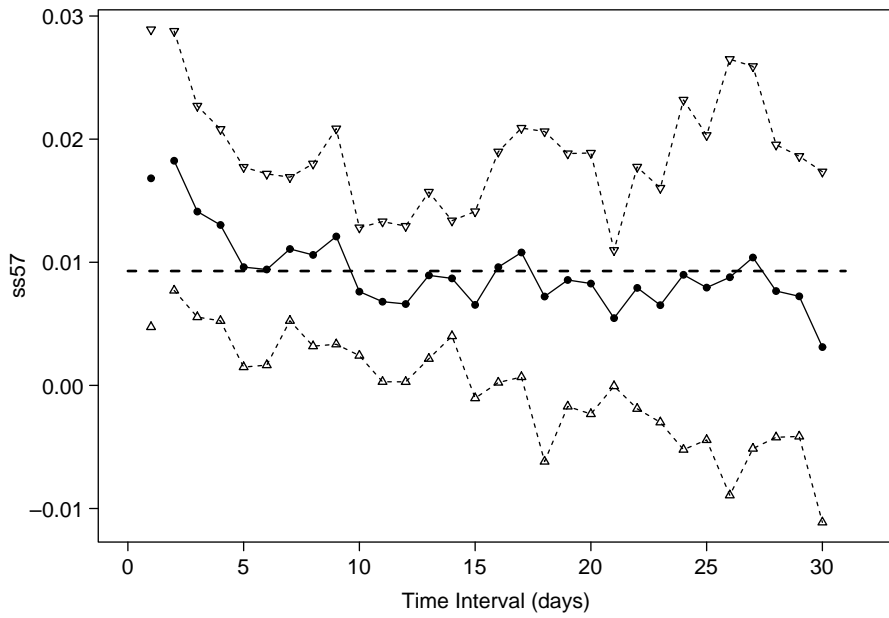

Figure S2.97. MLE of ss57 by Time Interval Compared to Overall Mean (0.0093) for  $p = 2$  and  $f(t) = \sqrt{t}$ .

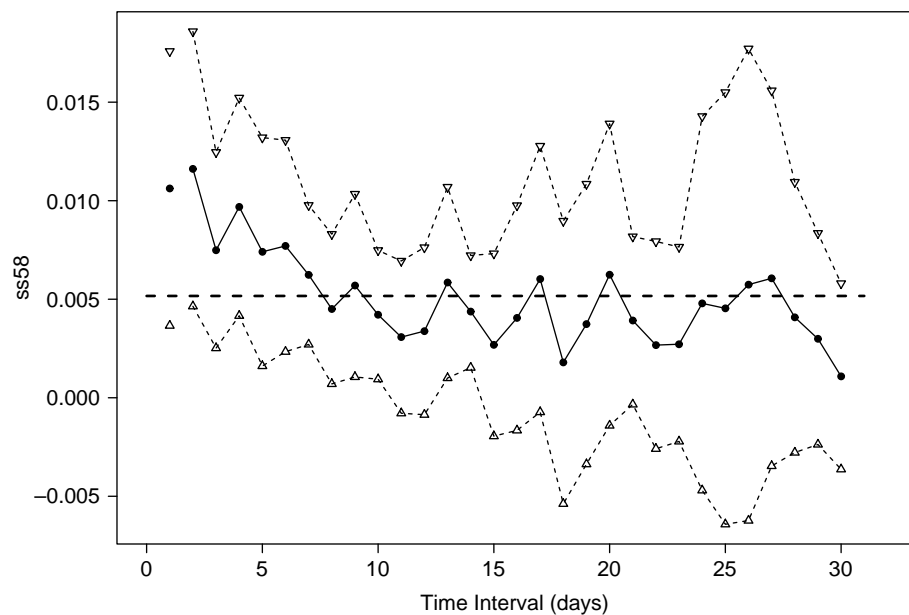

Figure S2.98. MLE of  $ss58$  by Time Interval Compared to Overall Mean (0.0052) for  $p = 2$  and  $f(t) = \sqrt{t}$ .

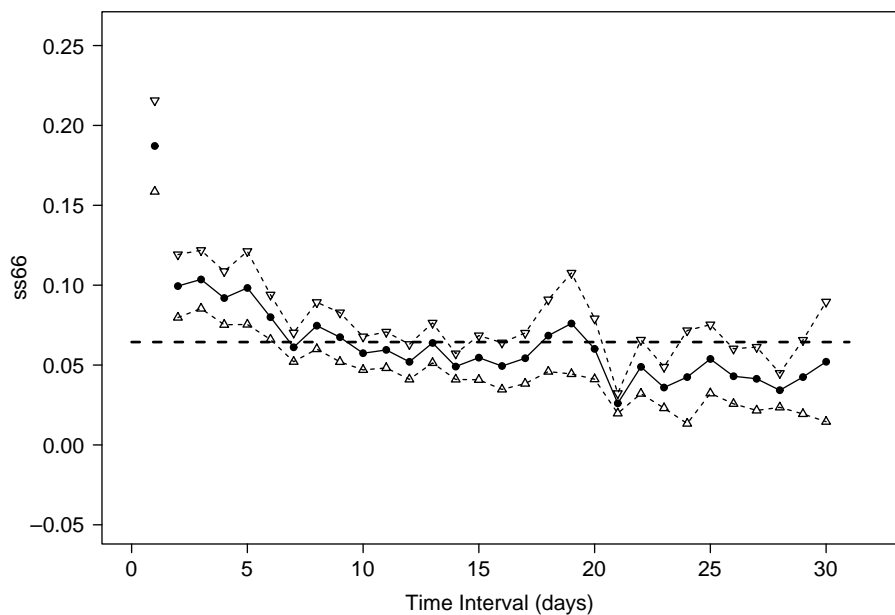

Figure S2.99. MLE of  $ss66$  by Time Interval Compared to Overall Mean (0.0644) for  $p = 2$  and  $f(t) = \sqrt{t}$ .

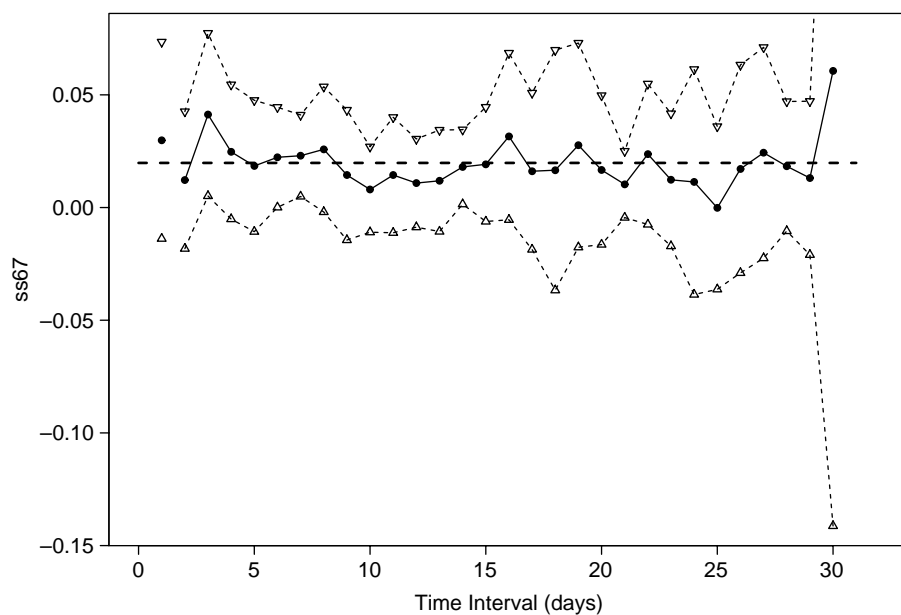

Figure S2.100. MLE of  $ss_{67}$  by Time Interval Compared to Overall Mean (0.0198) for  $p = 2$  and  $f(t) = \sqrt{t}$ .

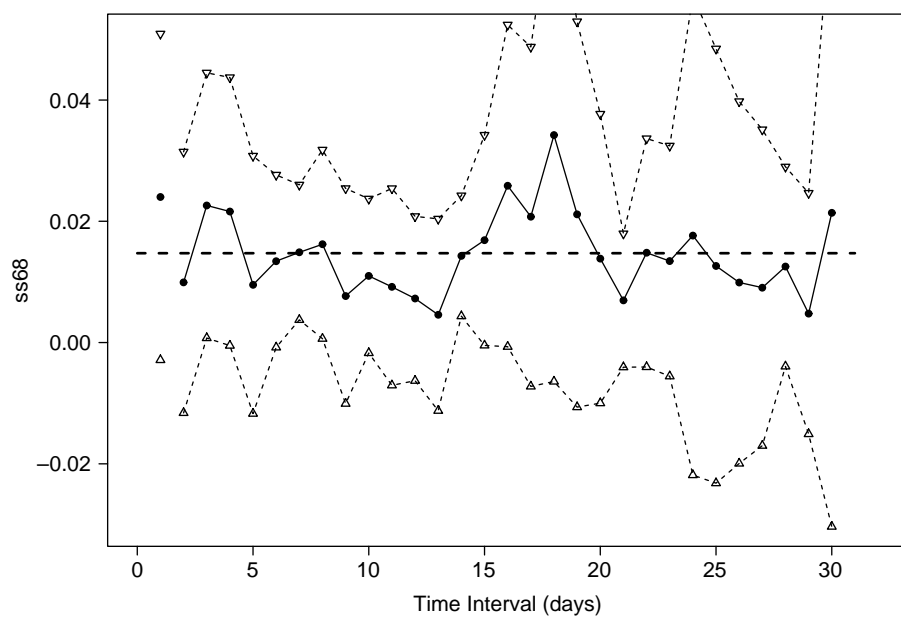

Figure S2.101. MLE of  $ss_{68}$  by Time Interval Compared to Overall Mean (0.0147) for  $p = 2$  and  $f(t) = \sqrt{t}$ .



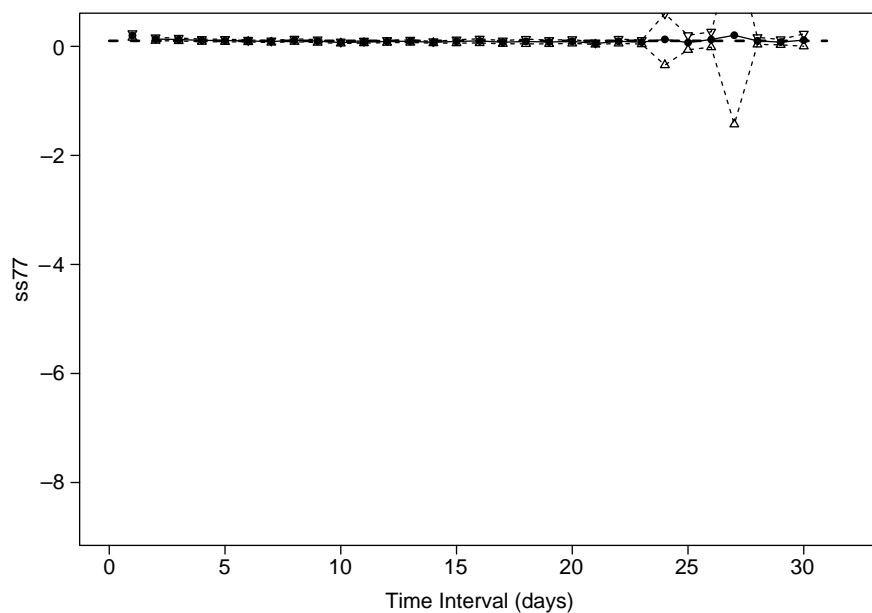

Figure S2.102. MLE of  $ss77$  by Time Interval Compared to Overall Mean (0.1013) for  $p = 2$  and  $f(t) = \sqrt{t}$ .

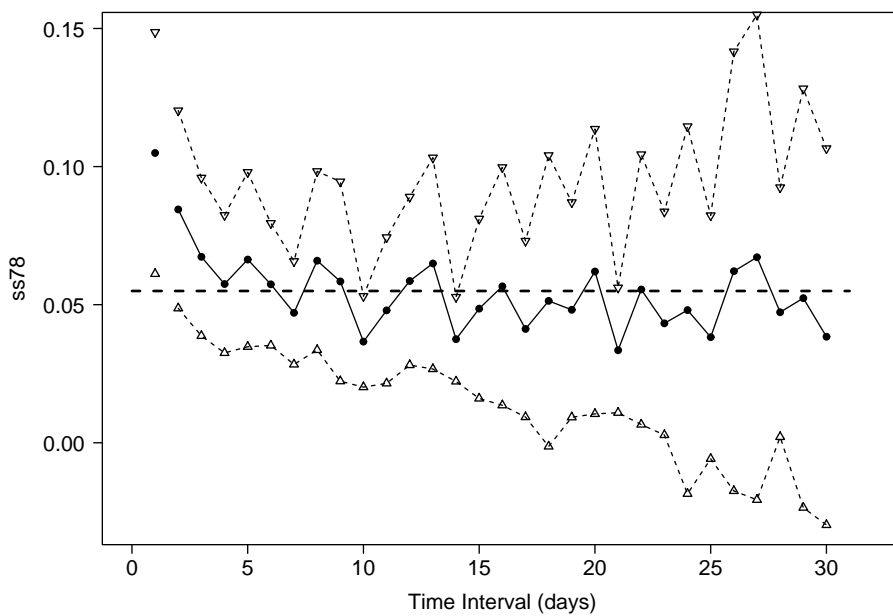

Figure S2.103. MLE of  $ss78$  by Time Interval Compared to Overall Mean (0.055) for  $p = 2$  and  $f(t) = \sqrt{t}$ .

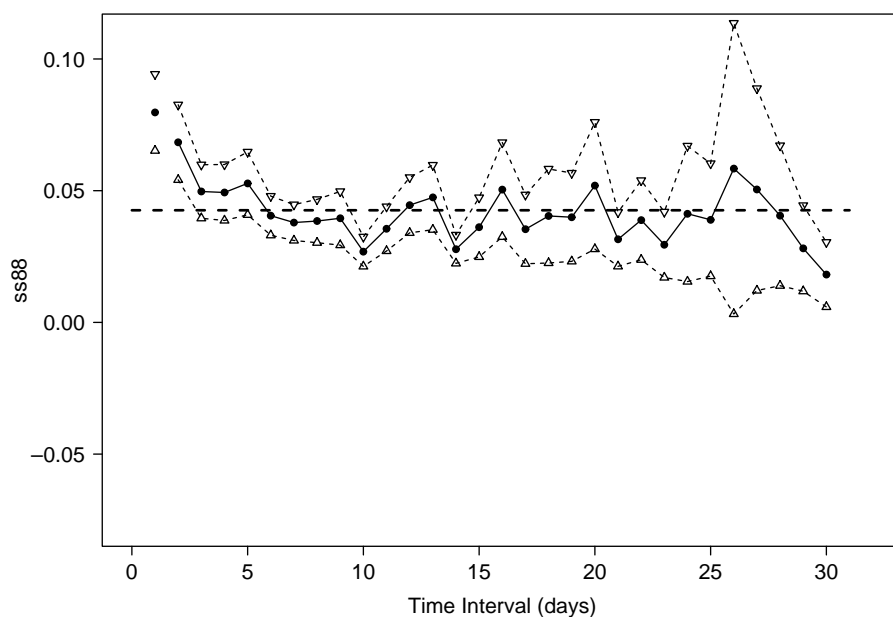

Figure S2.104. MLE of  $ss88$  by Time Interval Compared to Overall Mean (0.0426) for  $p = 2$  and  $f(t) = \sqrt{t}$ .

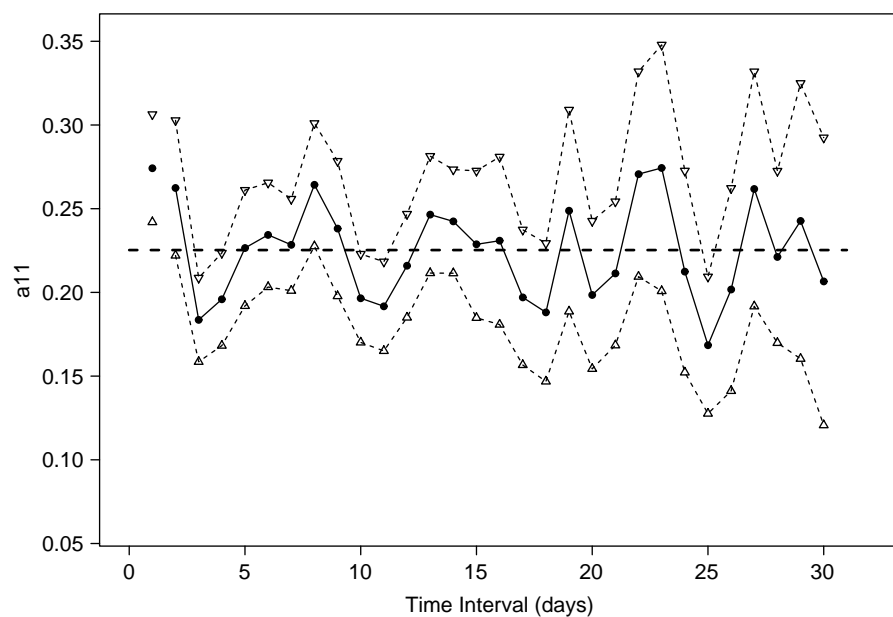

Figure S2.105. MLE of  $a11$  by Time Interval Compared to Overall Mean (0.2253) for  $p = 2$  and  $f(t) = \sqrt{t}$ .

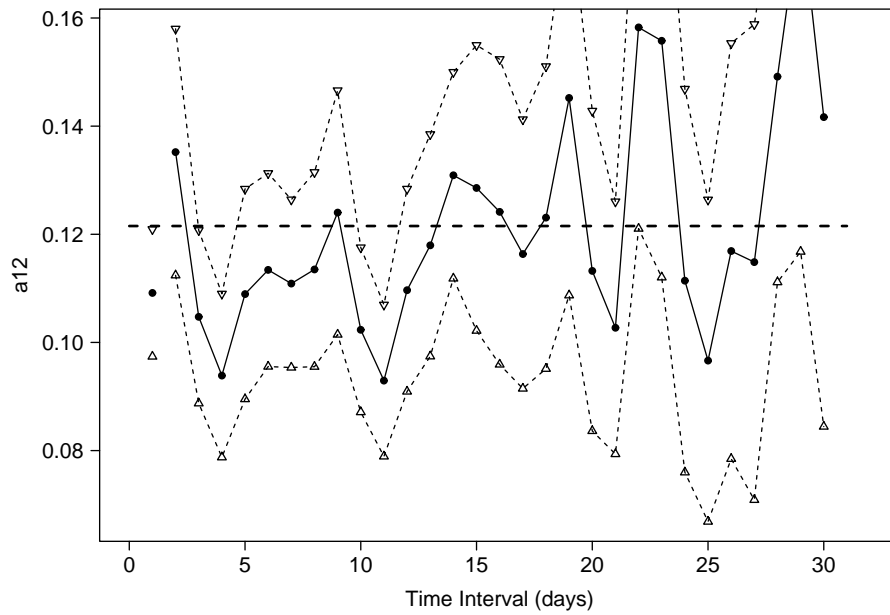

Figure S2.106. MLE of  $a_{12}$  by Time Interval Compared to Overall Mean (0.1215) for  $p = 2$  and  $f(t) = \sqrt{t}$ .

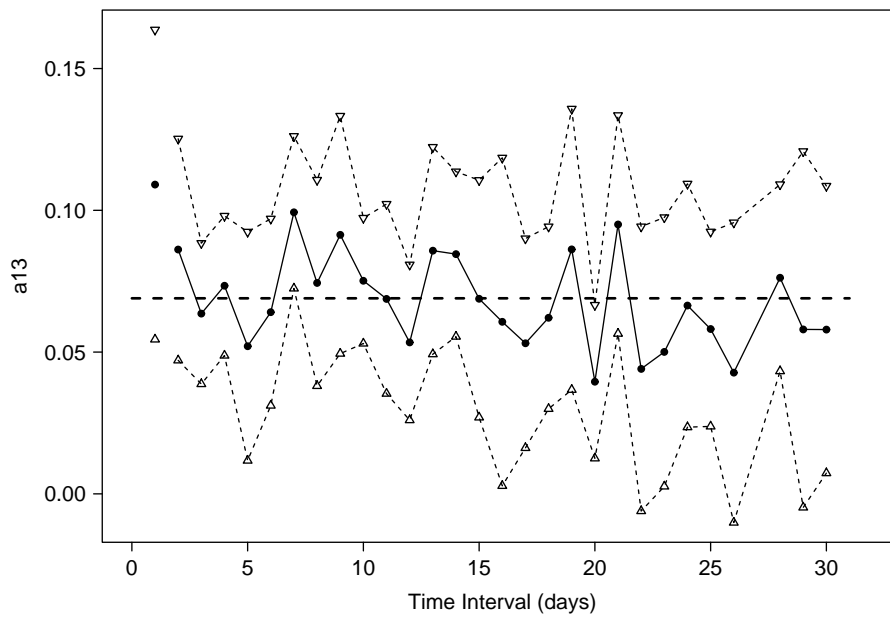

Figure S2.107. MLE of  $a_{13}$  by Time Interval Compared to Overall Mean (0.069) for  $p = 2$  and  $f(t) = \sqrt{t}$ .

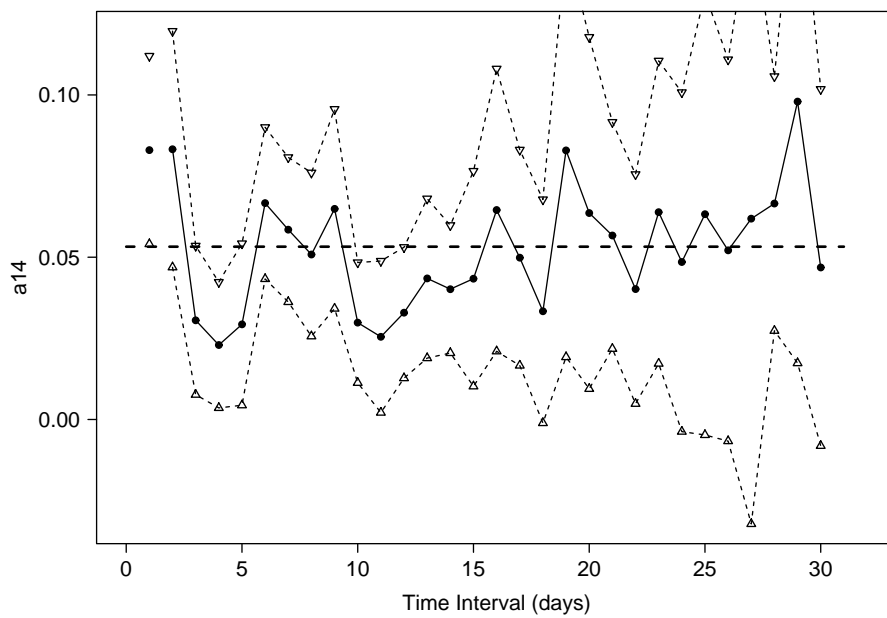

Figure S2.108. MLE of  $a_{14}$  by Time Interval Compared to Overall Mean (0.0532) for  $p = 2$  and  $f(t) = \sqrt{t}$ .

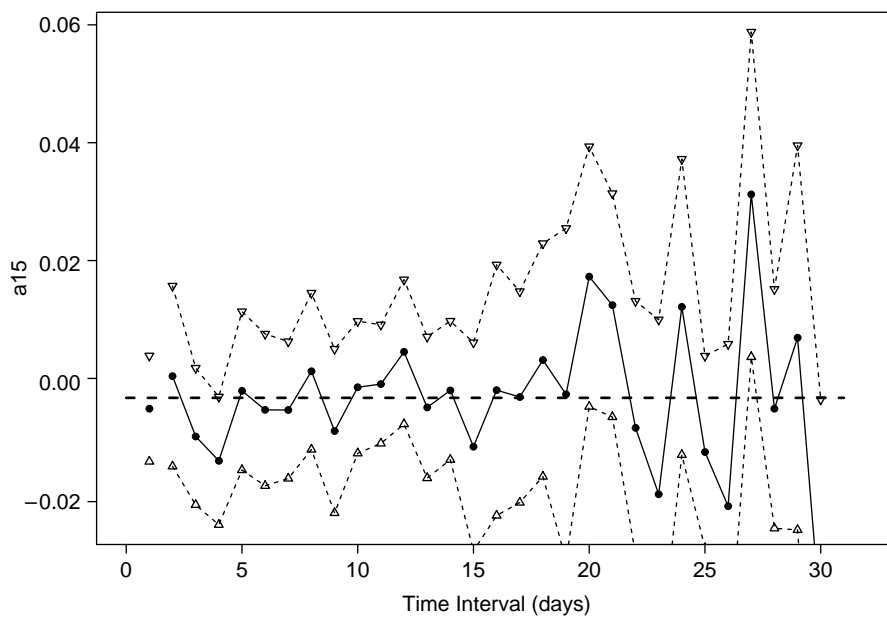

Figure S2.109. MLE of  $a_{15}$  by Time Interval Compared to Overall Mean (-0.0033) for  $p = 2$  and  $f(t) = \sqrt{t}$ .

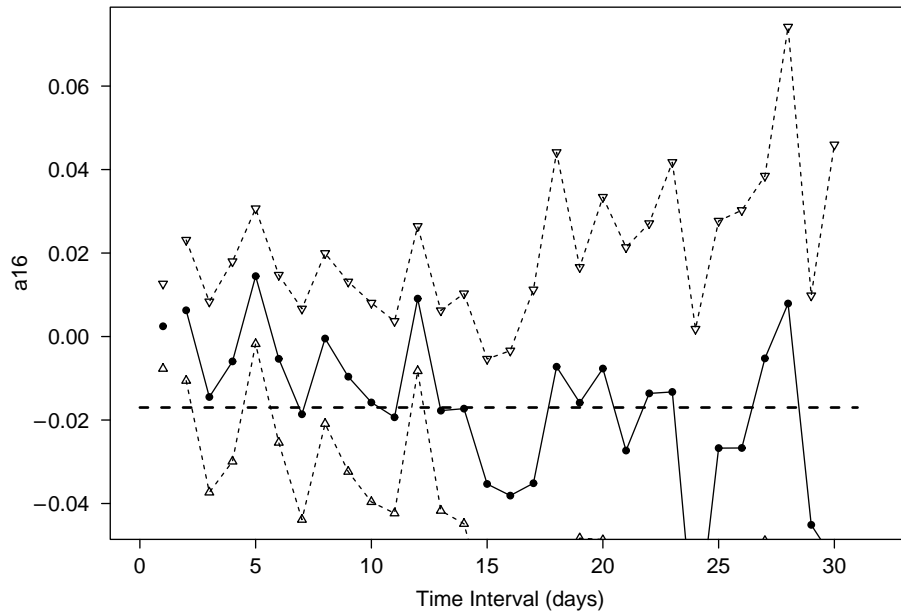

Figure S2.110. MLE of  $a_{16}$  by Time Interval Compared to Overall Mean ( $-0.017$ ) for  $p = 2$  and  $f(t) = \sqrt{t}$ .

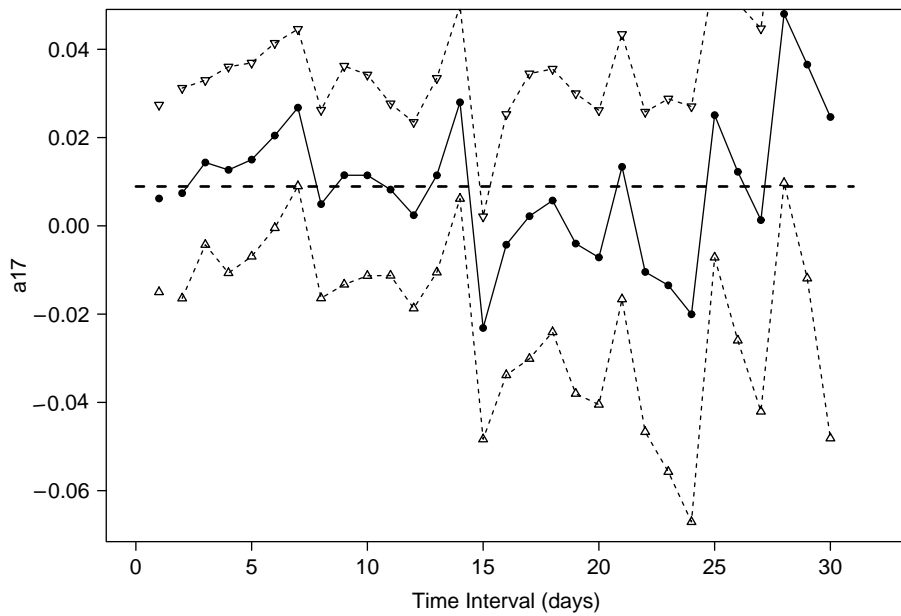

Figure S2.111. MLE of  $a_{17}$  by Time Interval Compared to Overall Mean ( $0.0089$ ) for  $p = 2$  and  $f(t) = \sqrt{t}$ .

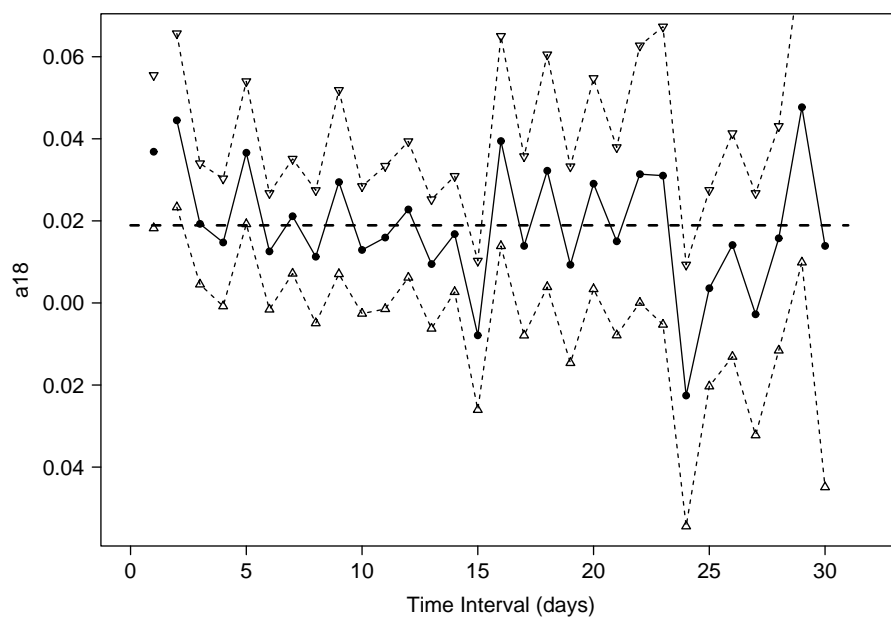

Figure S2.112. MLE of  $a_{18}$  by Time Interval Compared to Overall Mean (0.0189) for  $p = 2$  and  $f(t) = \sqrt{t}$ .

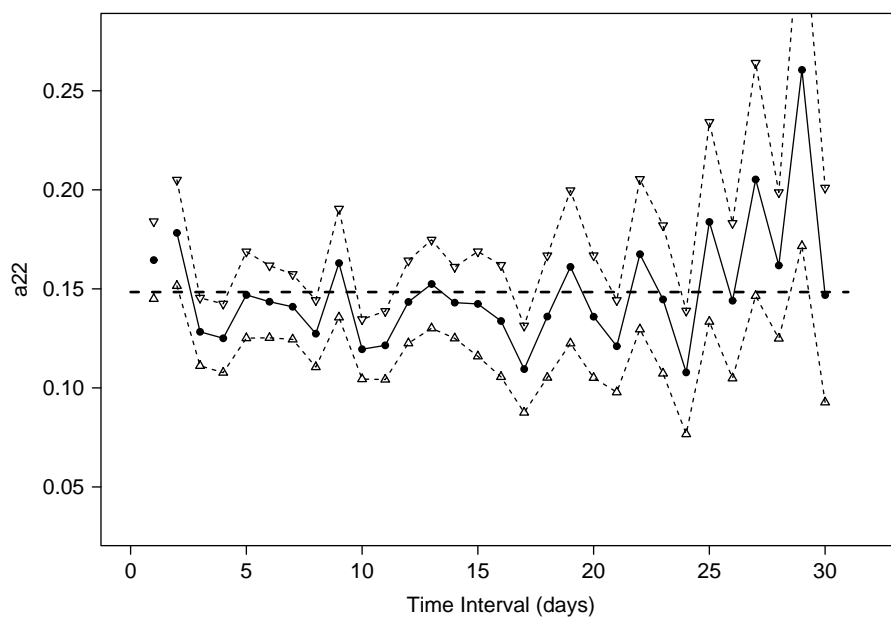

Figure S2.113. MLE of  $a_{22}$  by Time Interval Compared to Overall Mean (0.1484) for  $p = 2$  and  $f(t) = \sqrt{t}$ .

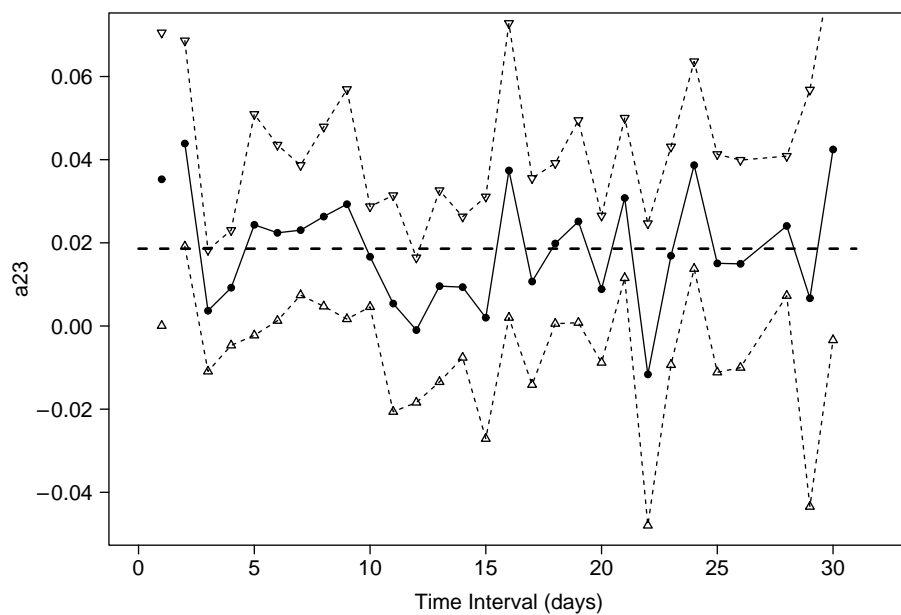

Figure S2.114. MLE of  $a_{23}$  by Time Interval Compared to Overall Mean (0.0186) for  $p = 2$  and  $f(t) = \sqrt{t}$ .

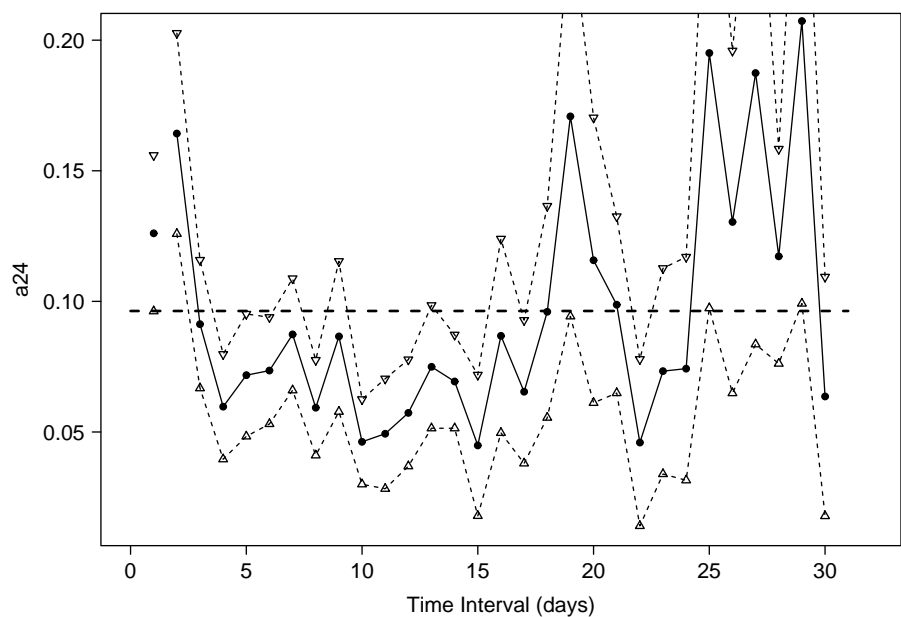

Figure S2.115. MLE of  $a_{24}$  by Time Interval Compared to Overall Mean (0.0963) for  $p = 2$  and  $f(t) = \sqrt{t}$ .

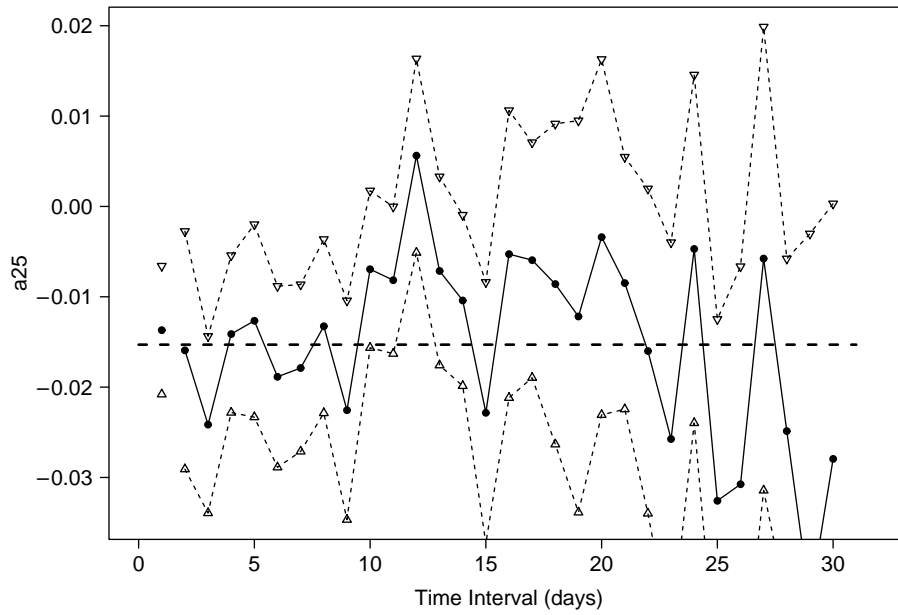

Figure S2.116. MLE of  $a_{25}$  by Time Interval Compared to Overall Mean ( $-0.0153$ ) for  $p = 2$  and  $f(t) = \sqrt{t}$ .

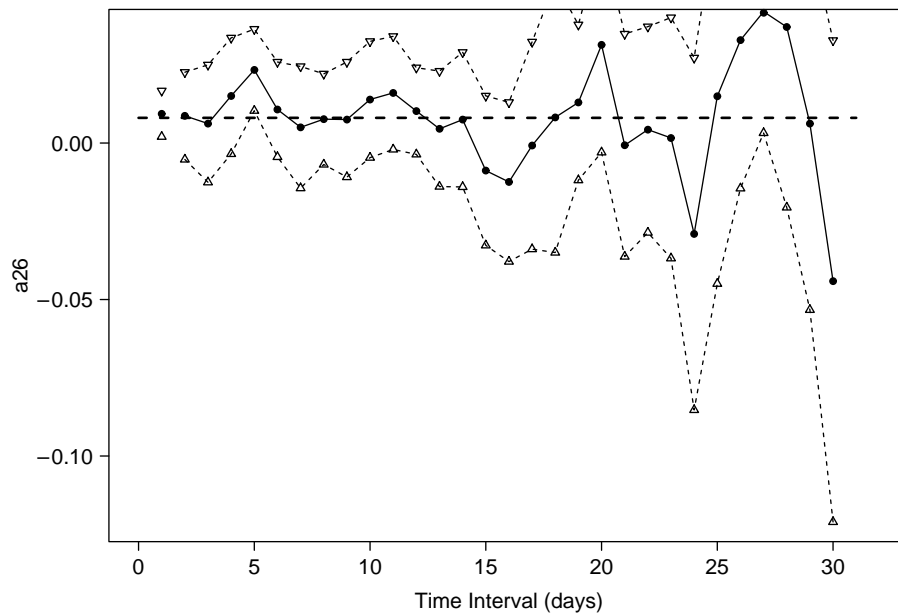

Figure S2.117. MLE of  $a_{26}$  by Time Interval Compared to Overall Mean ( $0.008$ ) for  $p = 2$  and  $f(t) = \sqrt{t}$ .



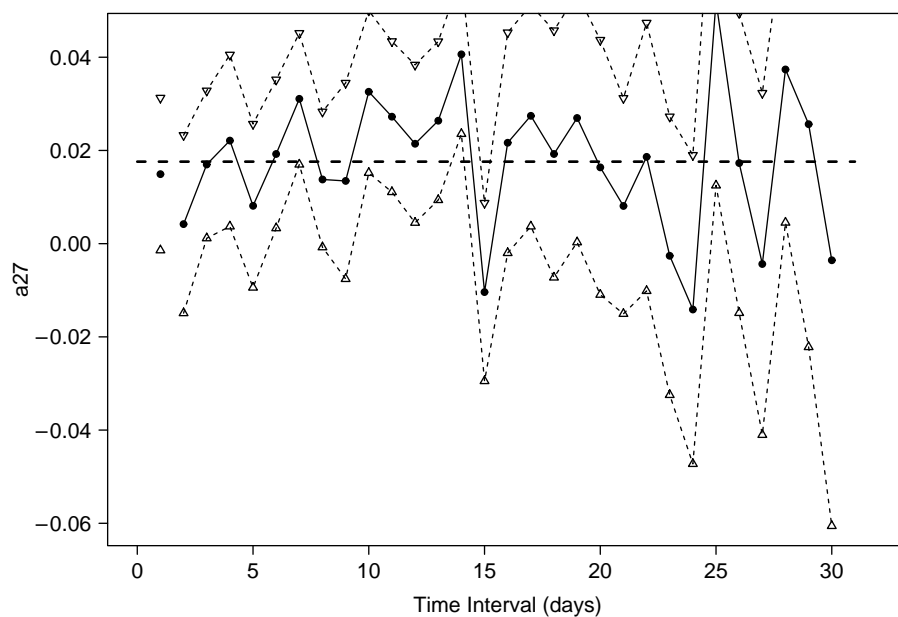

Figure S2.118. MLE of  $a_{27}$  by Time Interval Compared to Overall Mean (0.0176) for  $p = 2$  and  $f(t) = \sqrt{t}$ .

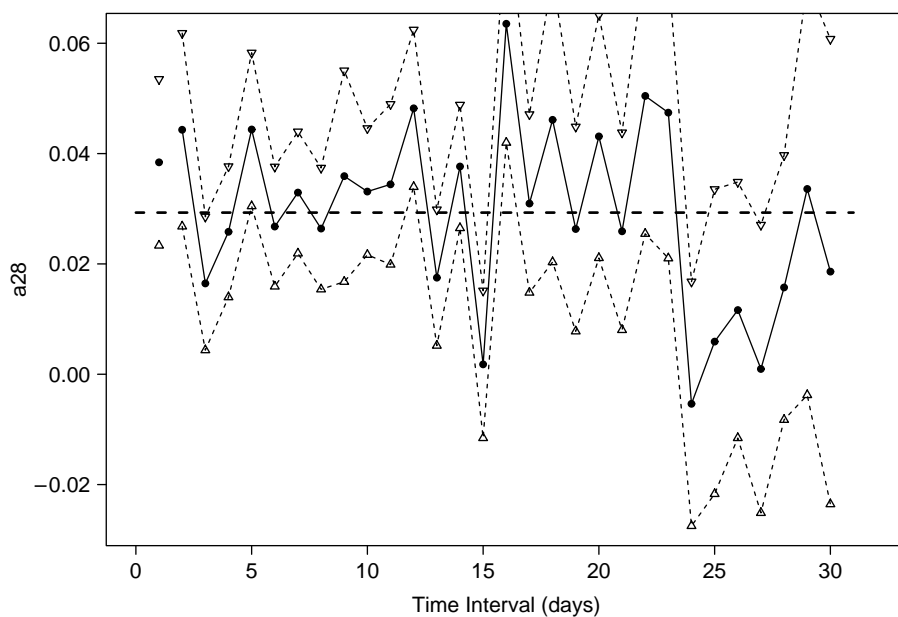

Figure S2.119. MLE of  $a_{28}$  by Time Interval Compared to Overall Mean (0.0293) for  $p = 2$  and  $f(t) = \sqrt{t}$ .

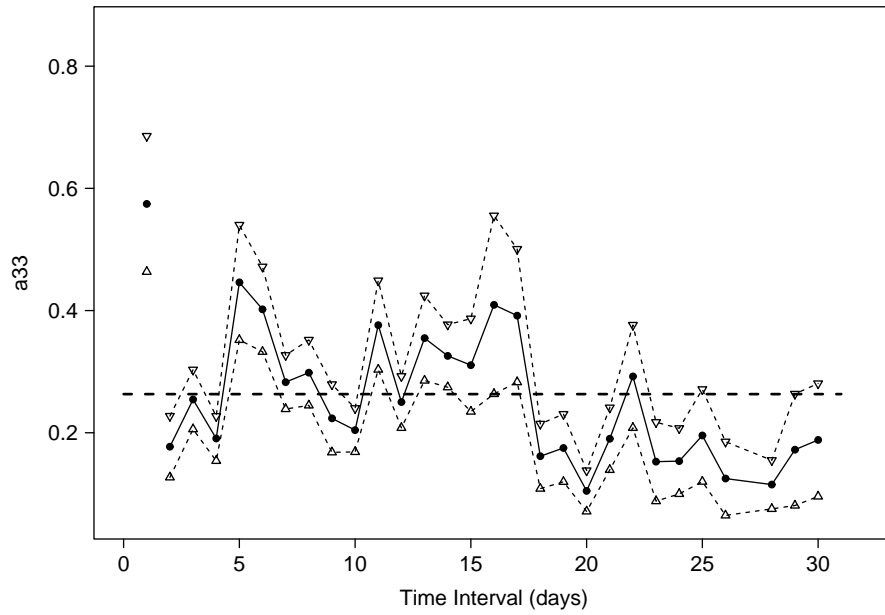

Figure S2.120. MLE of  $a_{33}$  by Time Interval Compared to Overall Mean (0.2633) for  $p = 2$  and  $f(t) = \sqrt{t}$ .

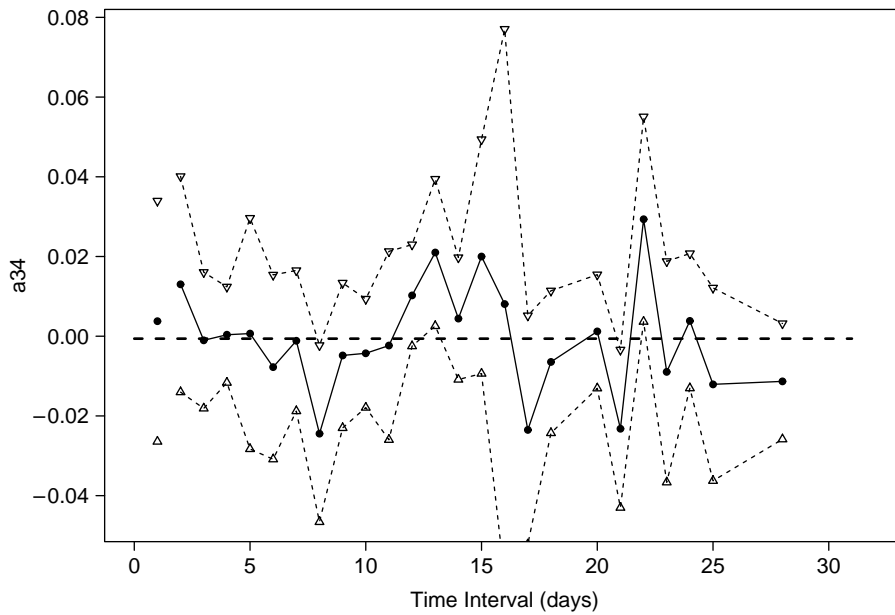

Figure S2.121. MLE of  $a_{34}$  by Time Interval Compared to Overall Mean ( $-6e-04$ ) for  $p = 2$  and  $f(t) = \sqrt{t}$ .

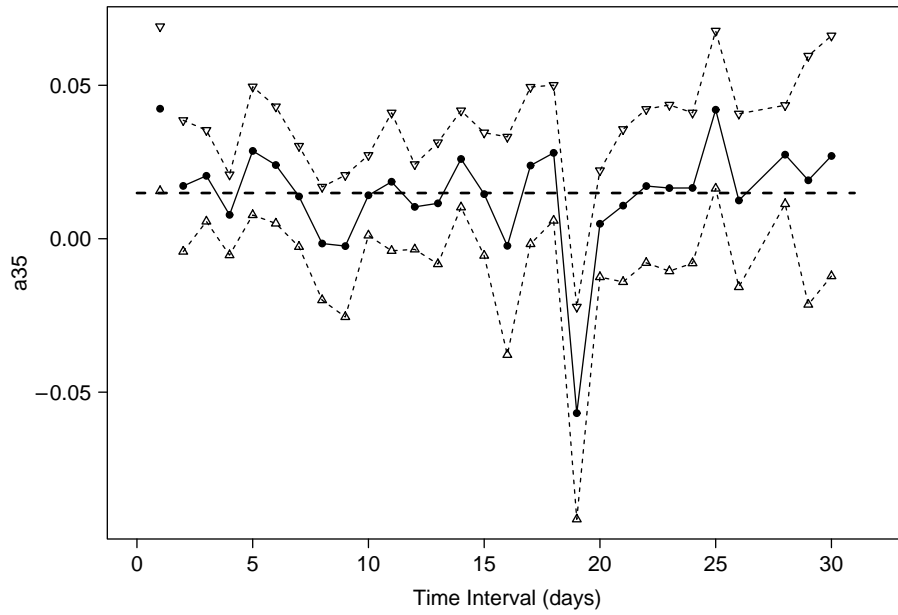

Figure S2.122. MLE of  $a_{35}$  by Time Interval Compared to Overall Mean (0.0149) for  $p = 2$  and  $f(t) = \sqrt{t}$ .

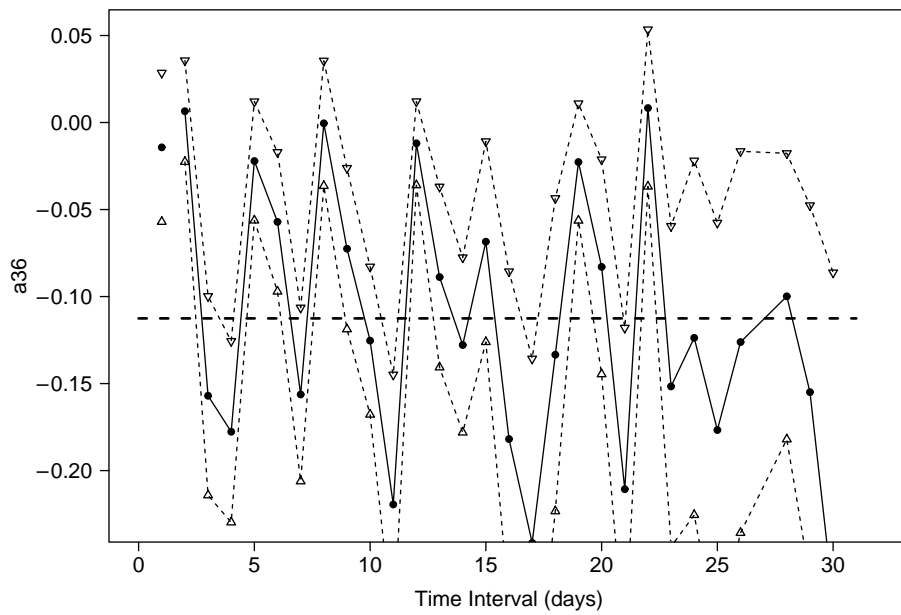

Figure S2.123. MLE of  $a_{36}$  by Time Interval Compared to Overall Mean (-0.1125) for  $p = 2$  and  $f(t) = \sqrt{t}$ .

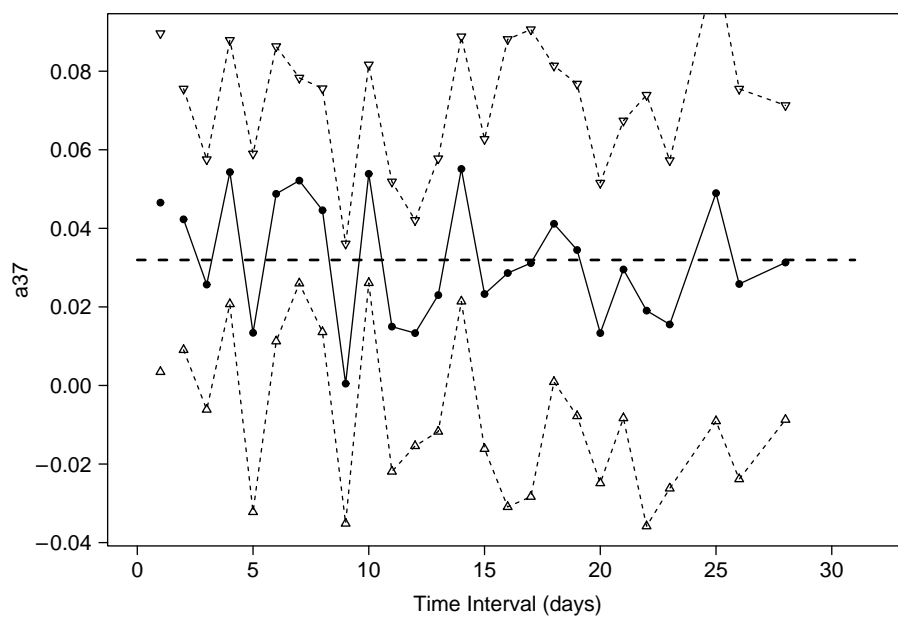

Figure S2.124. MLE of  $a_{37}$  by Time Interval Compared to Overall Mean (0.032) for  $p = 2$  and  $f(t) = \sqrt{t}$ .

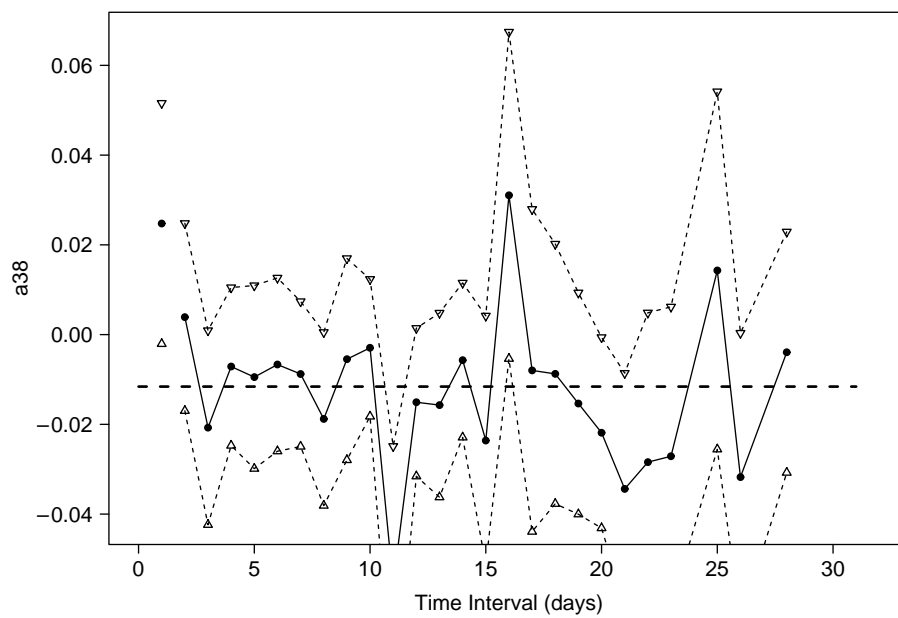

Figure S2.125. MLE of  $a_{38}$  by Time Interval Compared to Overall Mean ( $-0.0116$ ) for  $p = 2$  and  $f(t) = \sqrt{t}$ .

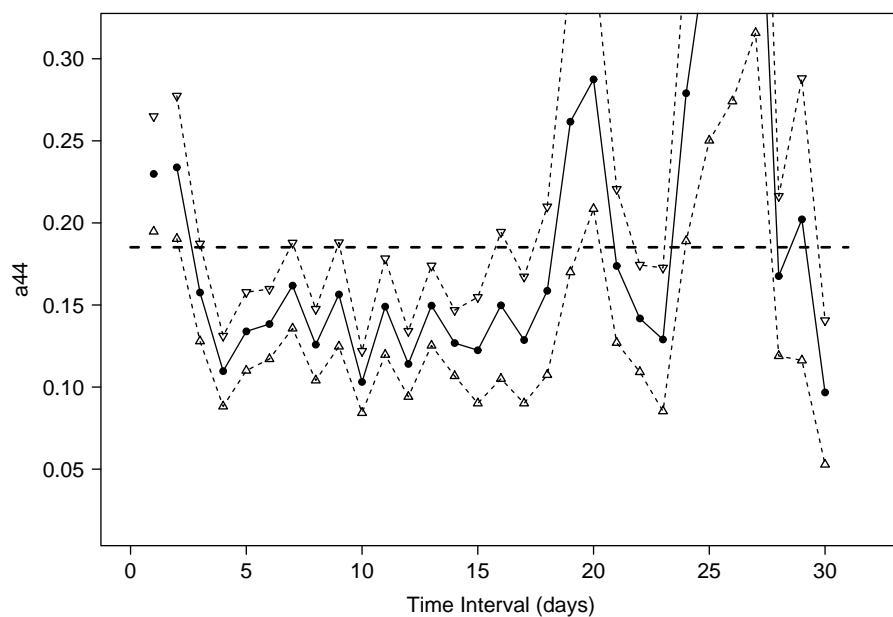

Figure S2.126. MLE of  $a_{44}$  by Time Interval Compared to Overall Mean (0.1852) for  $p = 2$  and  $f(t) = \sqrt{t}$ .

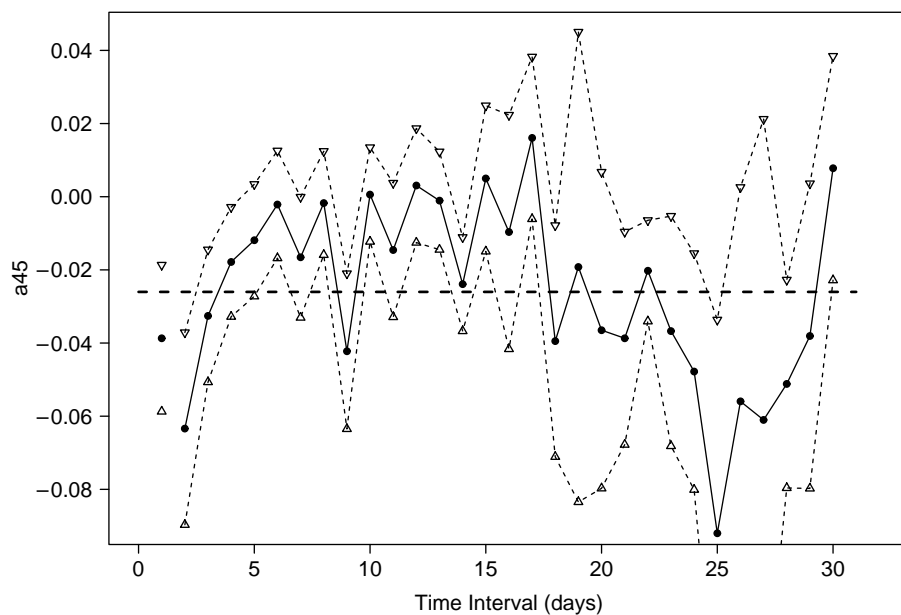

Figure S2.127. MLE of  $a_{45}$  by Time Interval Compared to Overall Mean (-0.026) for  $p = 2$  and  $f(t) = \sqrt{t}$ .

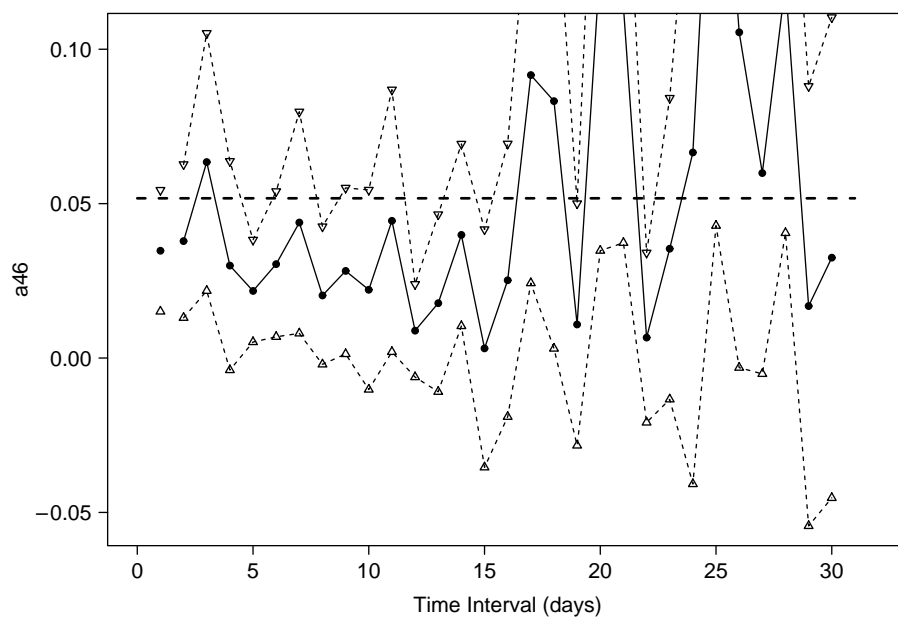

Figure S2.128. MLE of  $a_{46}$  by Time Interval Compared to Overall Mean (0.0517) for  $p = 2$  and  $f(t) = \sqrt{t}$ .

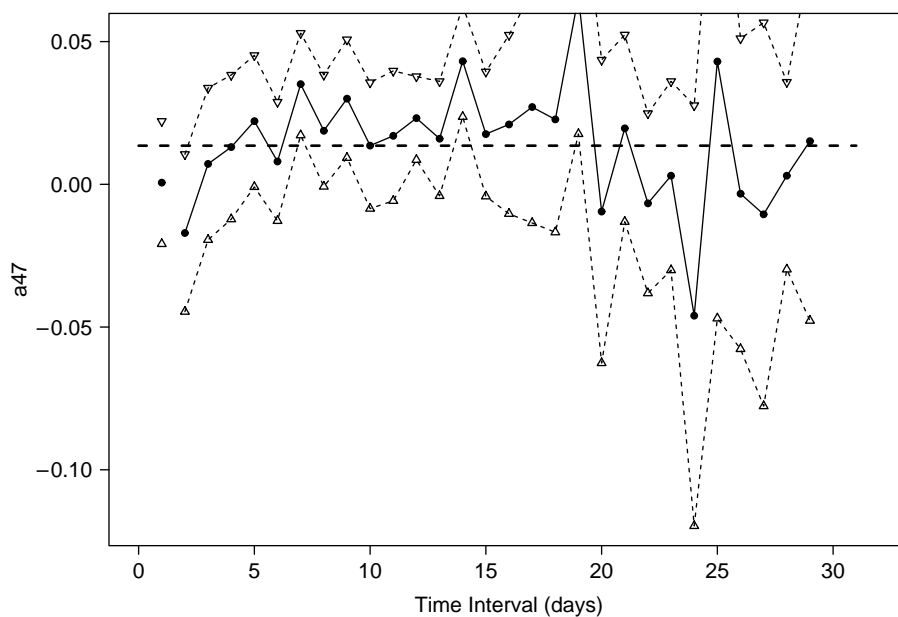

Figure S2.129. MLE of  $a_{47}$  by Time Interval Compared to Overall Mean (0.0135) for  $p = 2$  and  $f(t) = \sqrt{t}$ .

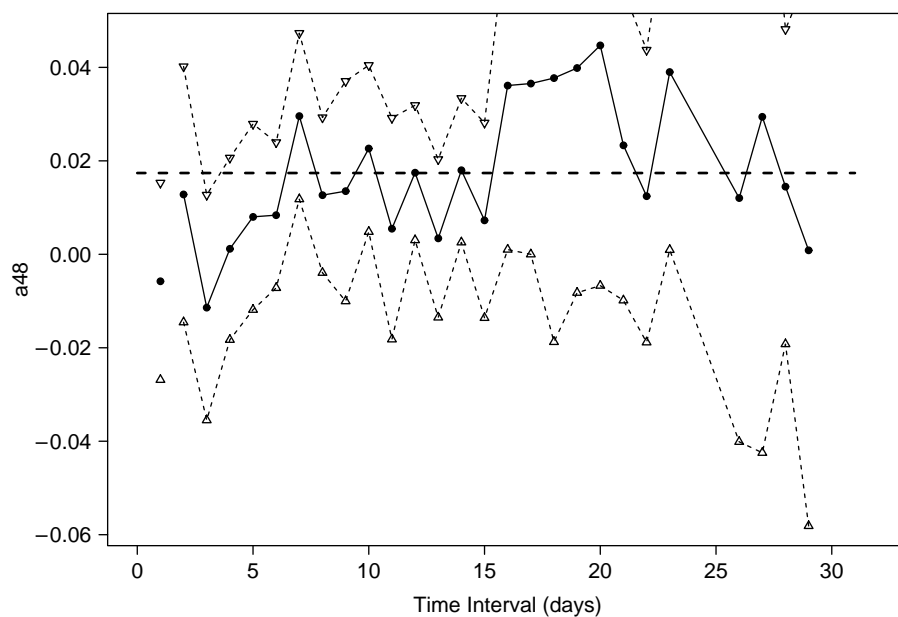

Figure S2.130. MLE of  $a_{48}$  by Time Interval Compared to Overall Mean (0.0174) for  $p = 2$  and  $f(t) = \sqrt{t}$ .

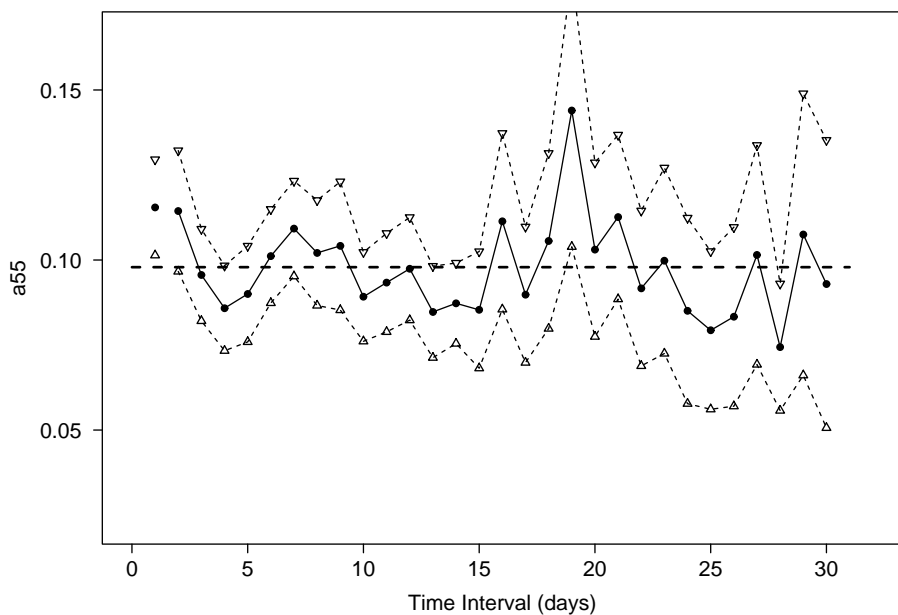

Figure S2.131. MLE of  $a_{55}$  by Time Interval Compared to Overall Mean (0.0979) for  $p = 2$  and  $f(t) = \sqrt{t}$ .

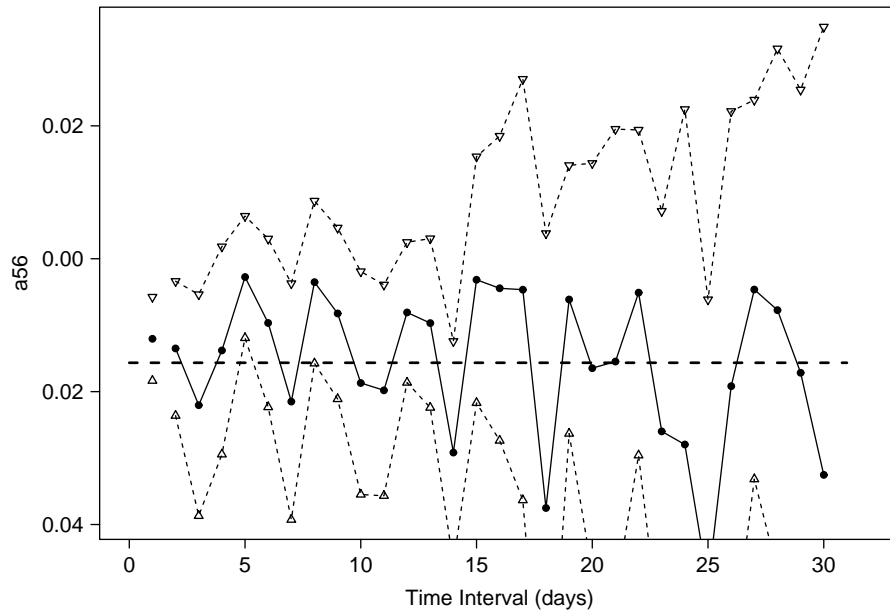

Figure S2.132. MLE of  $a_{56}$  by Time Interval Compared to Overall Mean ( $-0.0157$ ) for  $p = 2$  and  $f(t) = \sqrt{t}$ .

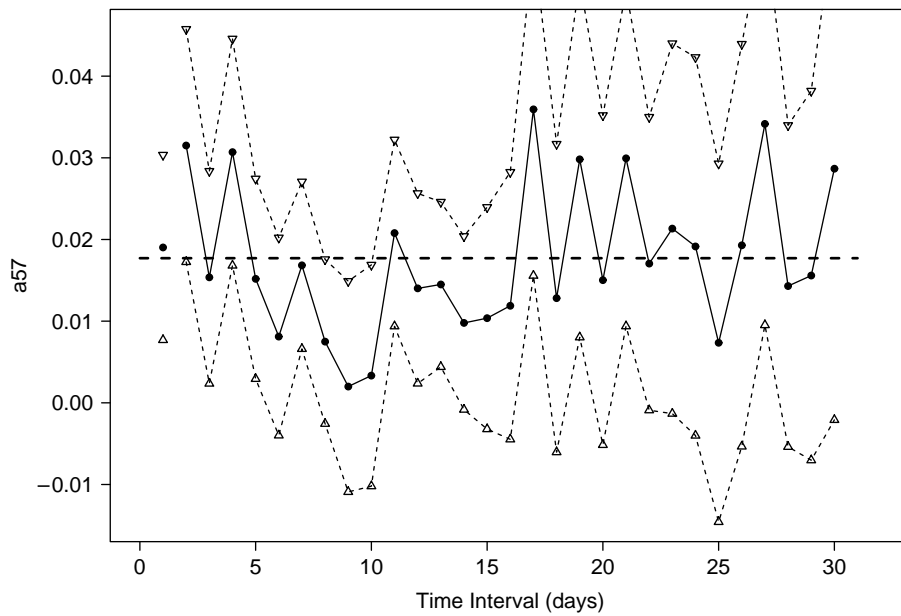

Figure S2.133. MLE of  $a_{57}$  by Time Interval Compared to Overall Mean ( $0.0177$ ) for  $p = 2$  and  $f(t) = \sqrt{t}$ .



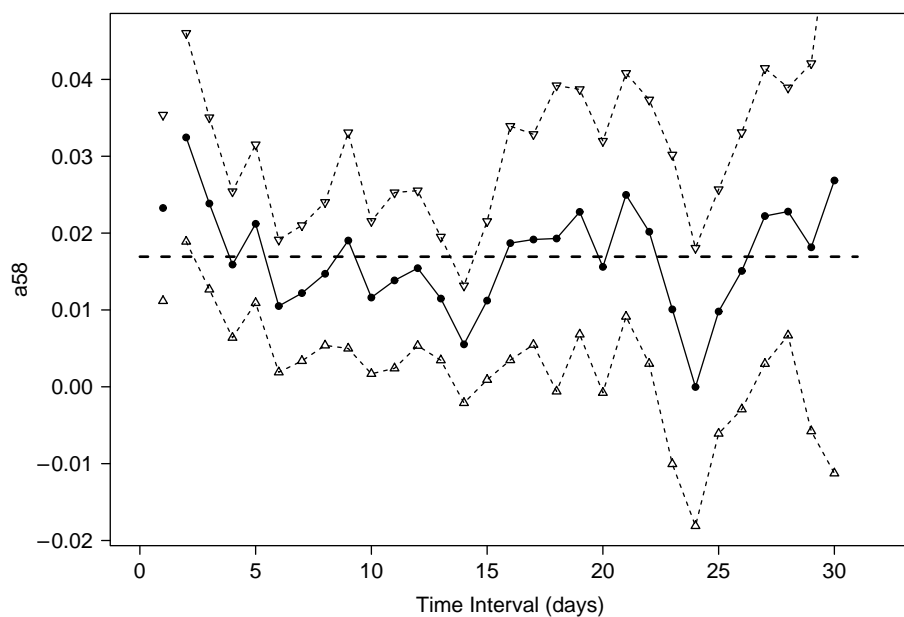

Figure S2.134. MLE of  $a_{58}$  by Time Interval Compared to Overall Mean (0.0169) for  $p = 2$  and  $f(t) = \sqrt{t}$ .

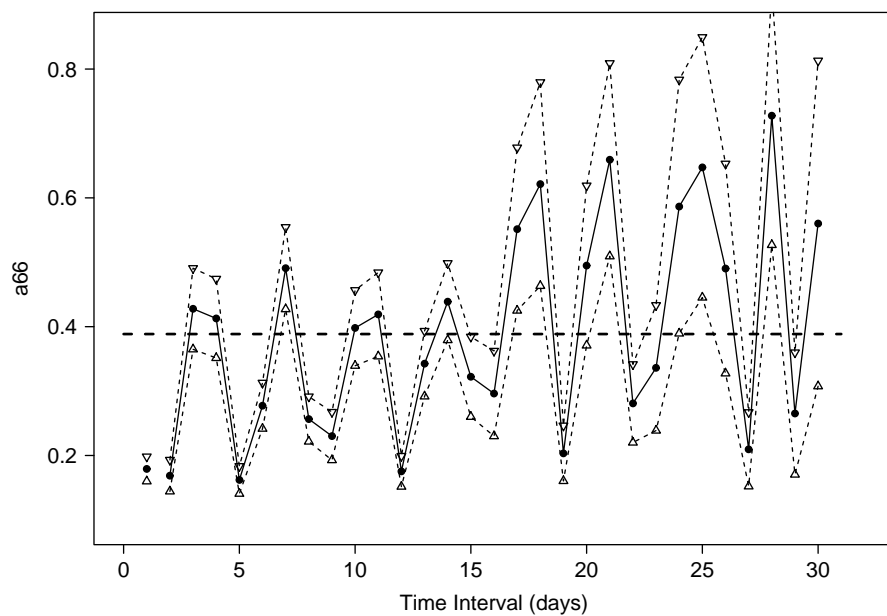

Figure S2.135. MLE of  $a_{66}$  by Time Interval Compared to Overall Mean (0.3885) for  $p = 2$  and  $f(t) = \sqrt{t}$ .

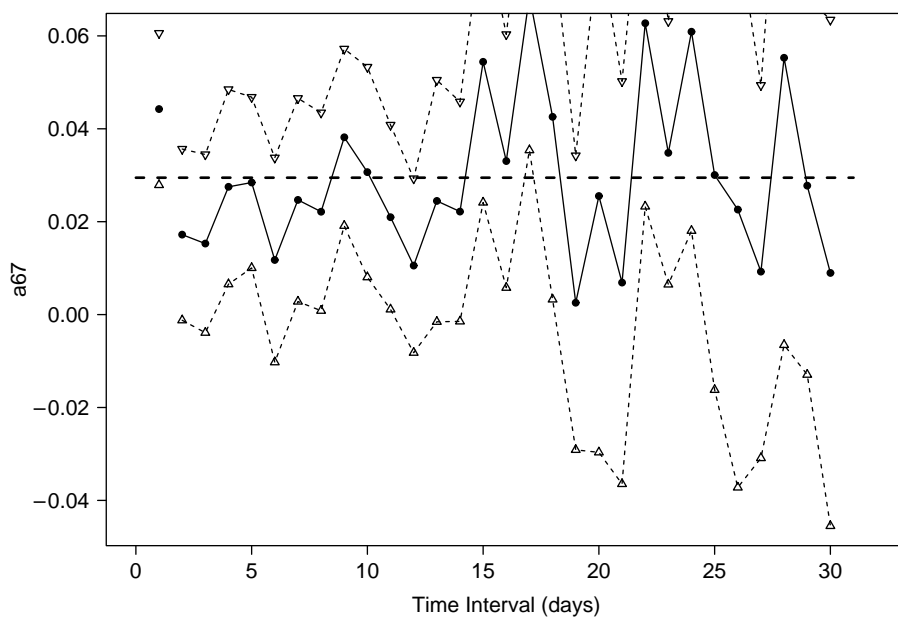

Figure S2.136. MLE of  $a_{67}$  by Time Interval Compared to Overall Mean (0.0295) for  $p = 2$  and  $f(t) = \sqrt{t}$ .

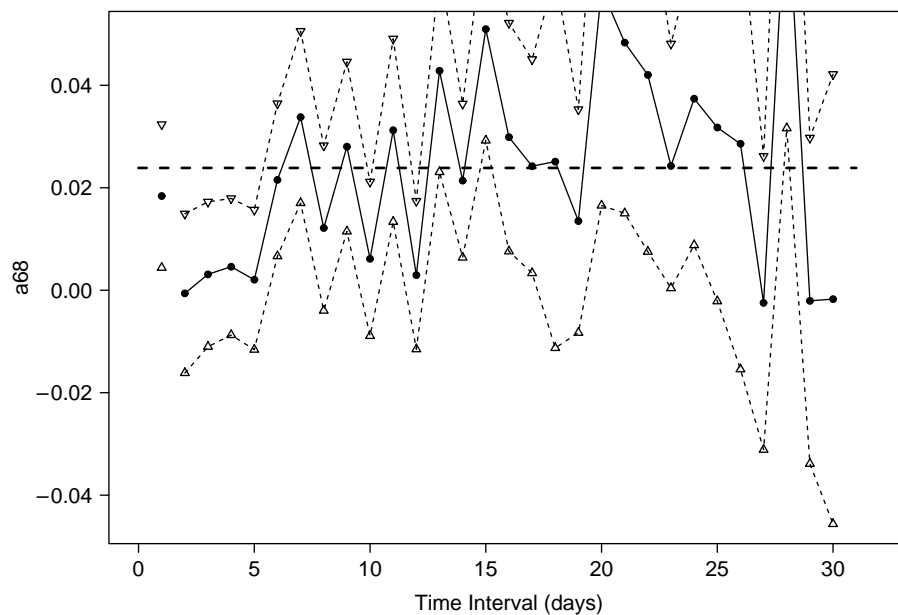

Figure S2.137. MLE of  $a_{68}$  by Time Interval Compared to Overall Mean (0.0239) for  $p = 2$  and  $f(t) = \sqrt{t}$ .

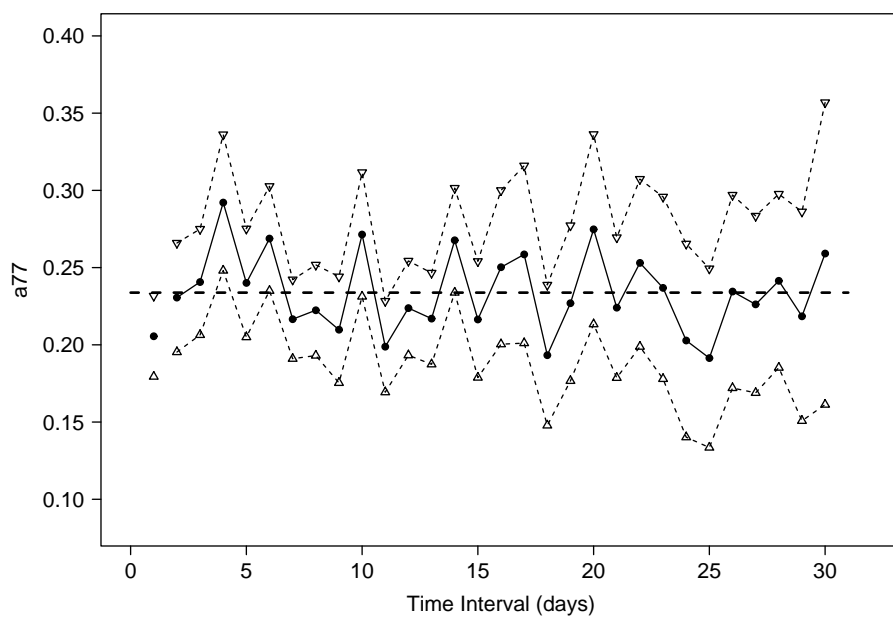

Figure S2.138. MLE of  $a_{77}$  by Time Interval Compared to Overall Mean (0.2338) for  $p = 2$  and  $f(t) = \sqrt{t}$ .

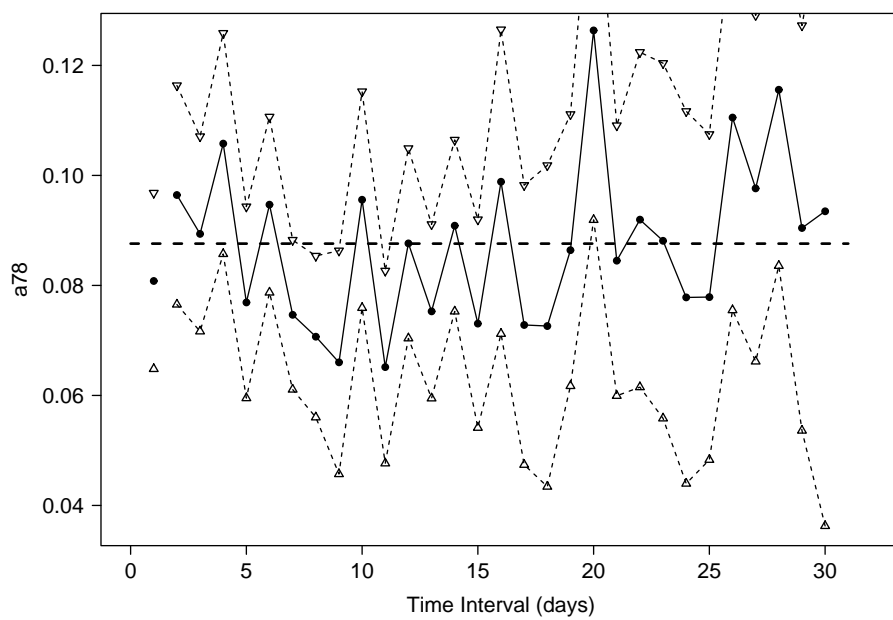

Figure S2.139. MLE of  $a_{78}$  by Time Interval Compared to Overall Mean (0.0876) for  $p = 2$  and  $f(t) = \sqrt{t}$ .

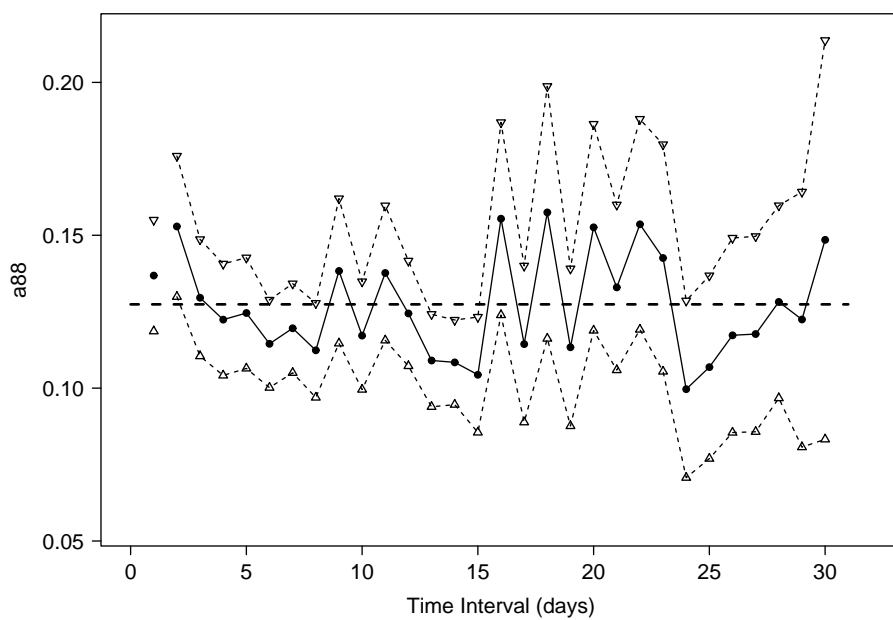

Figure S2.140. MLE of  $a_{88}$  by Time Interval Compared to Overall Mean (0.1274) for  $p = 2$  and  $f(t) = \sqrt{t}$ .

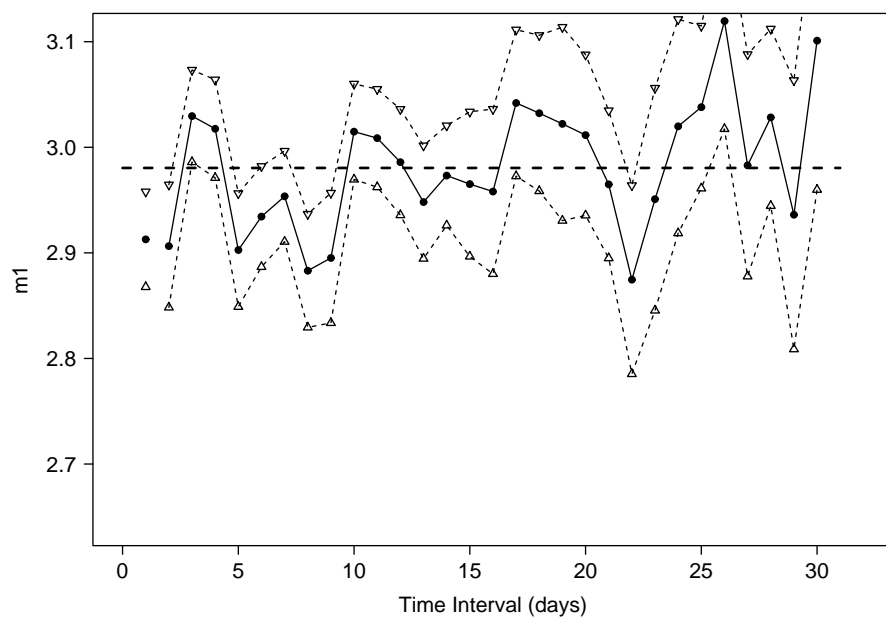

Figure S2.141. MLE of  $m_1$  by Time Interval Compared to Overall Mean (2.9804) for  $p = 2$  and  $f(t) = \sqrt{t}$ .

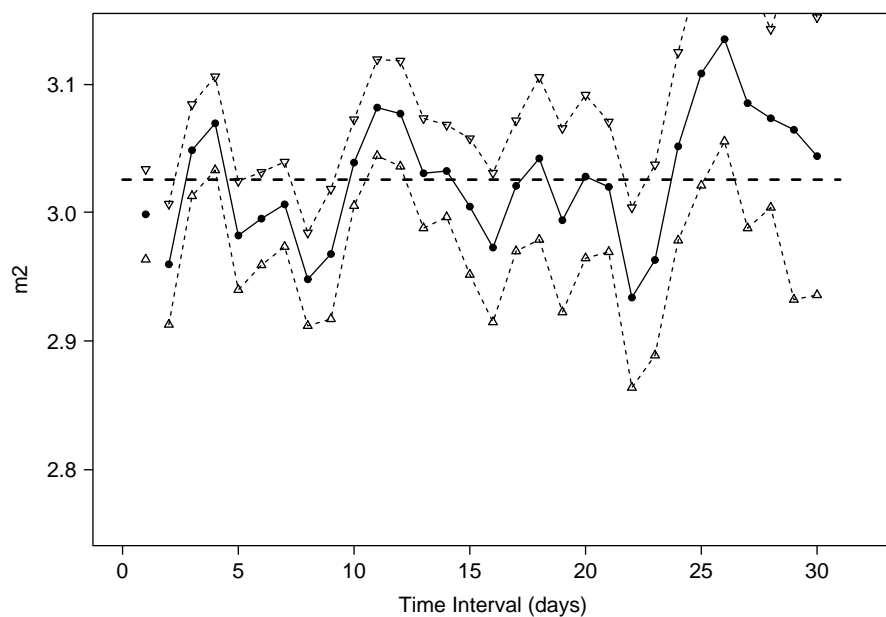

Figure S2.142. MLE of  $m_2$  by Time Interval Compared to Overall Mean (3.0252) for  $p = 2$  and  $f(t) = \sqrt{t}$ .

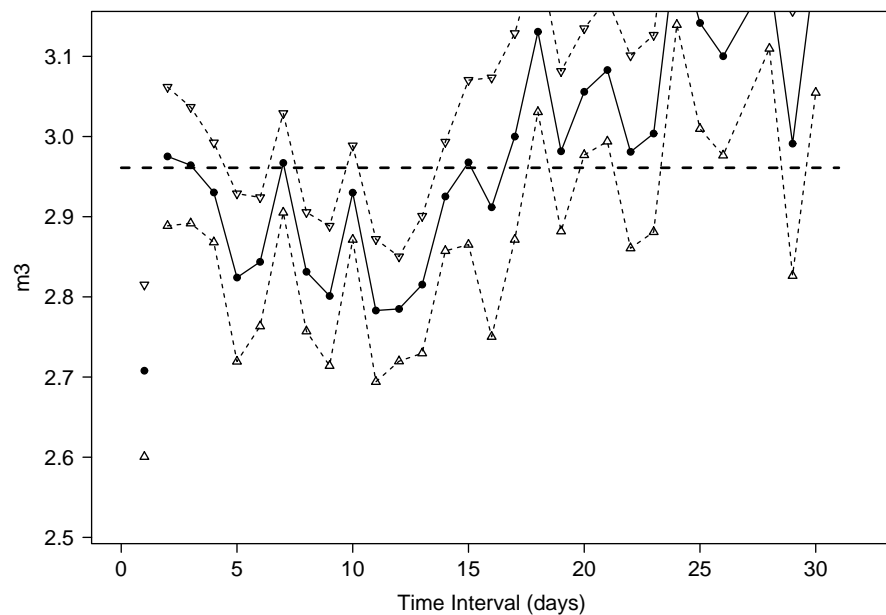

Figure S2.143. MLE of  $m_3$  by Time Interval Compared to Overall Mean (2.961) for  $p = 2$  and  $f(t) = \sqrt{t}$ .

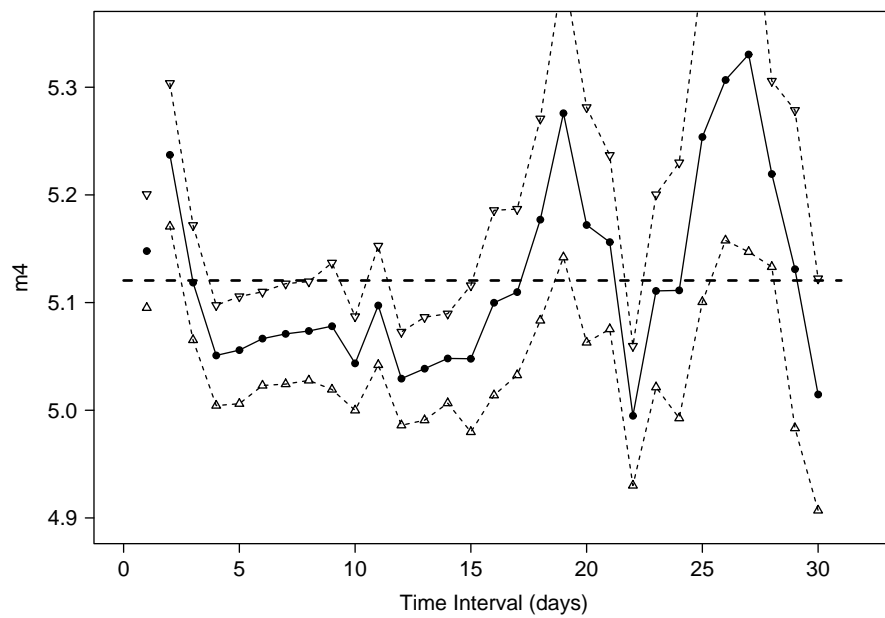

Figure S2.144. MLE of  $m_4$  by Time Interval Compared to Overall Mean (5.1205) for  $p = 2$  and  $f(t) = \sqrt{t}$ .

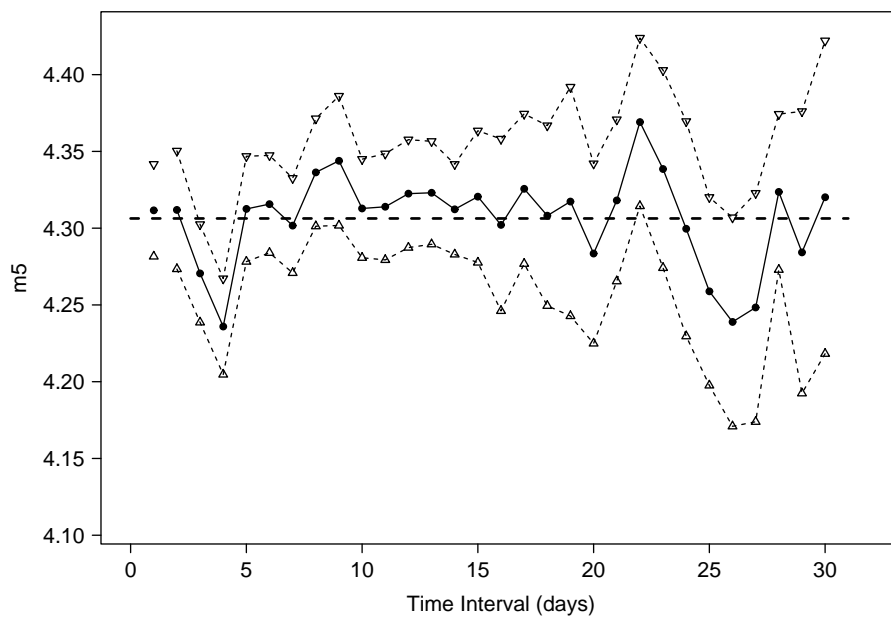

Figure S2.145. MLE of  $m_5$  by Time Interval Compared to Overall Mean (4.3063) for  $p = 2$  and  $f(t) = \sqrt{t}$ .

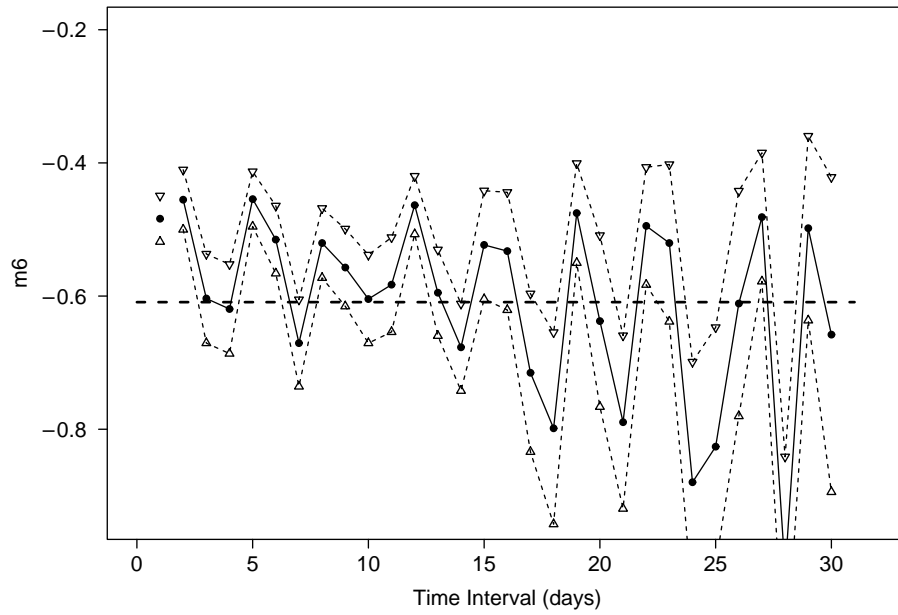

Figure S2.146. MLE of  $m_6$  by Time Interval Compared to Overall Mean ( $-0.6091$ ) for  $p = 2$  and  $f(t) = \sqrt{t}$ .

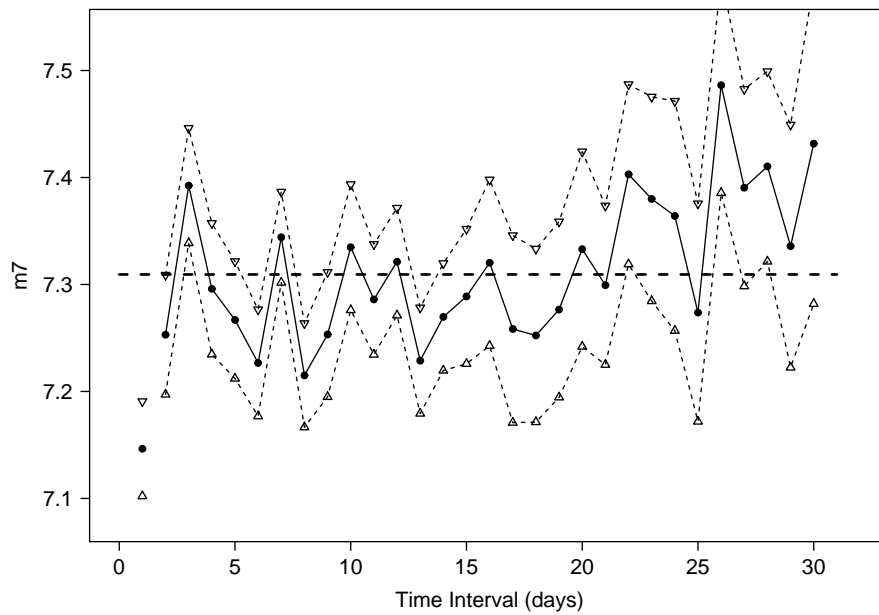

Figure S2.147. MLE of  $m_7$  by Time Interval Compared to Overall Mean ( $7.3094$ ) for  $p = 2$  and  $f(t) = \sqrt{t}$ .

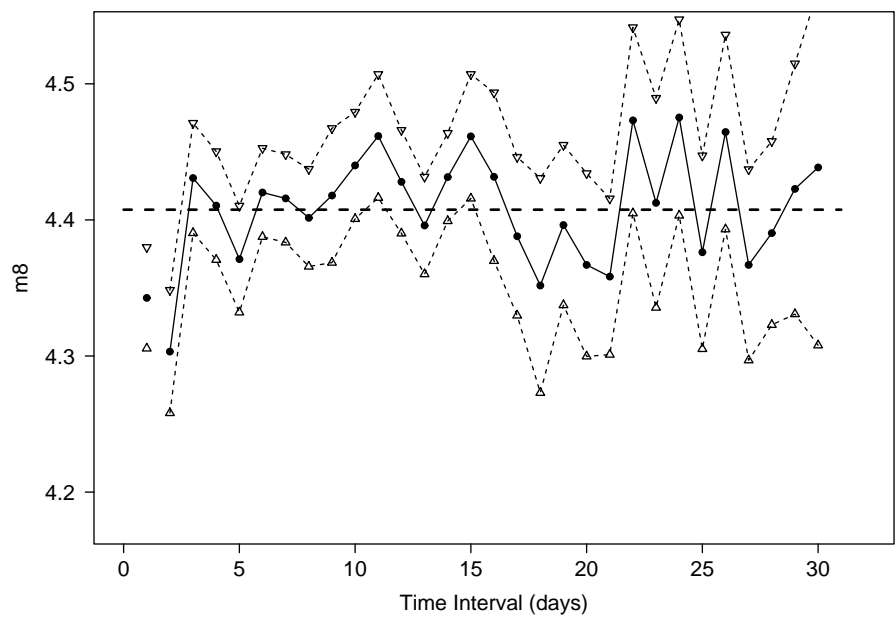

Figure S2.148. MLE of  $m_8$  by Time Interval Compared to Overall Mean (4.4075) for  $p = 2$  and  $f(t) = \sqrt{t}$ .

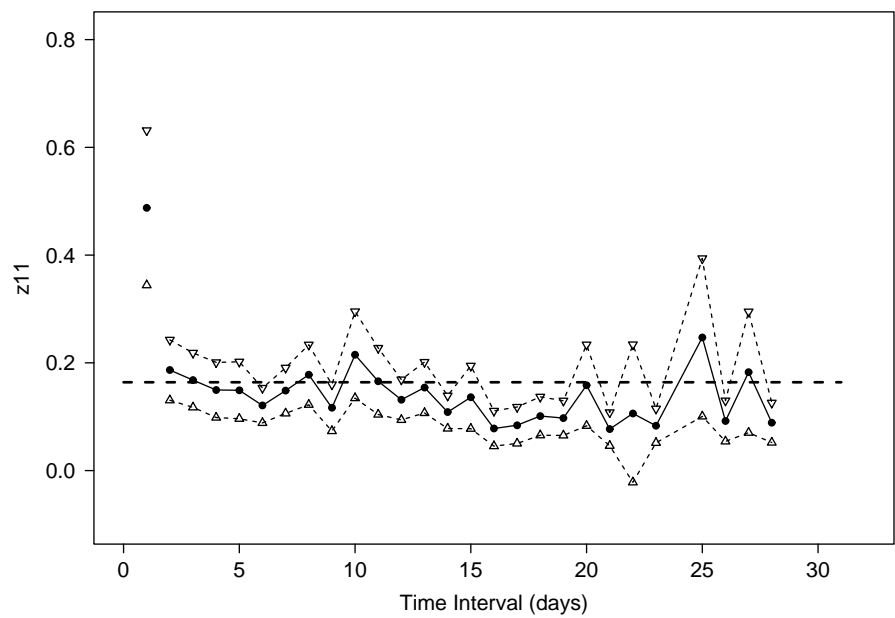

Figure S2.149. MLE of  $z_{11}$  by Time Interval Compared to Overall Mean (0.164) for  $p = 6$  and  $f(t) = \sqrt{t}$ .



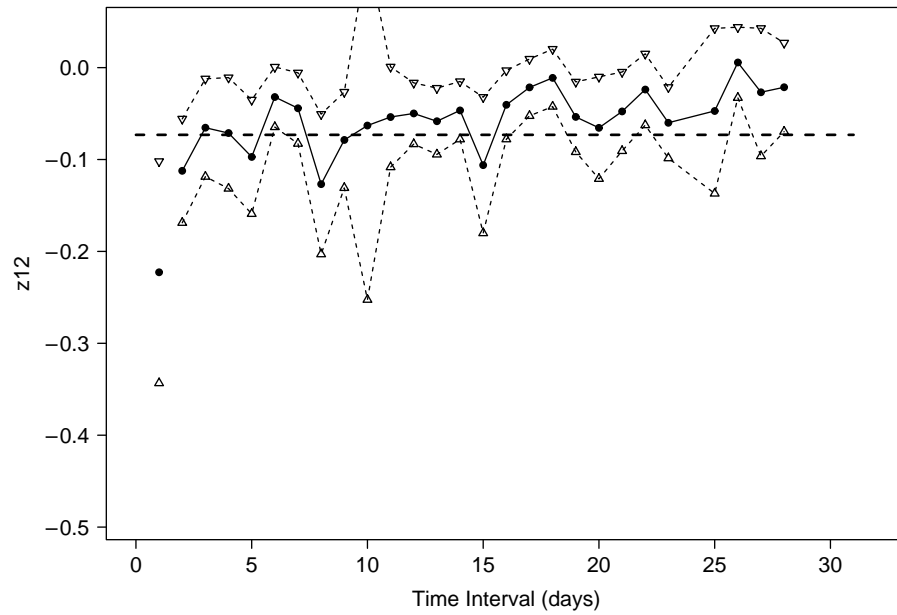

Figure S2.150. MLE of  $z_{12}$  by Time Interval Compared to Overall Mean ( $-0.0731$ ) for  $p = 6$  and  $f(t) = \sqrt{t}$ .

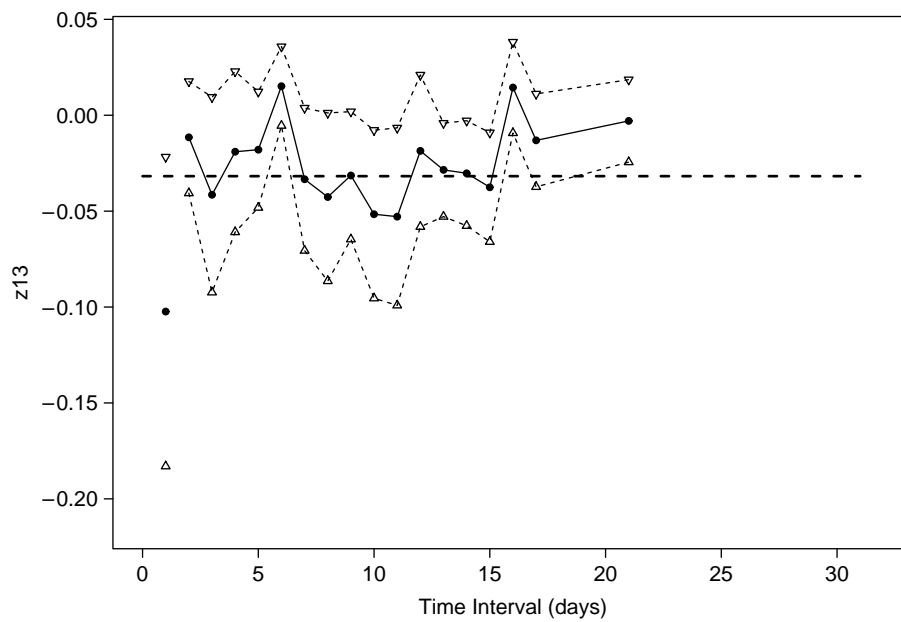

Figure S2.151. MLE of  $z_{13}$  by Time Interval Compared to Overall Mean ( $-0.0318$ ) for  $p = 6$  and  $f(t) = \sqrt{t}$ .

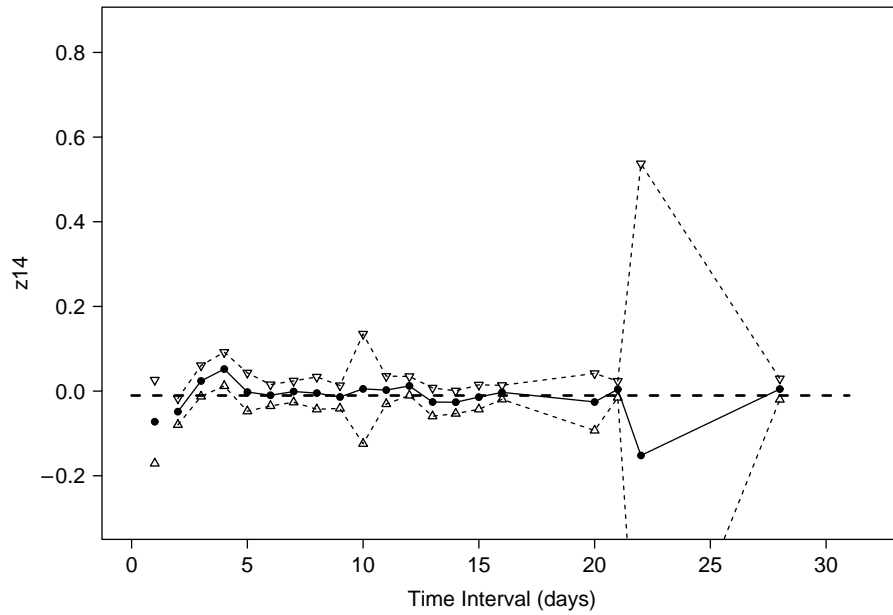

Figure S2.152. MLE of  $z_{14}$  by Time Interval Compared to Overall Mean ( $-0.0104$ ) for  $p = 6$  and  $f(t) = \sqrt{t}$ .

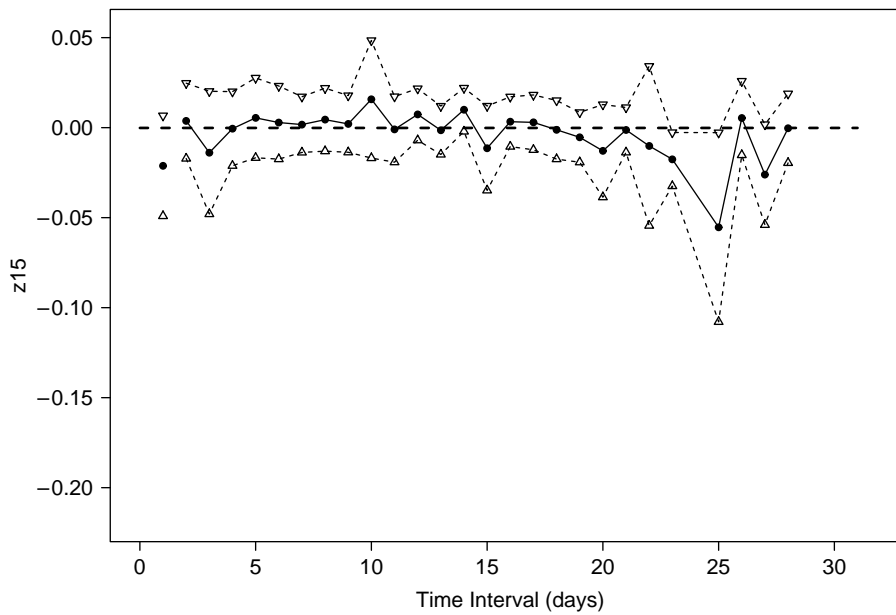

Figure S2.153. MLE of  $z_{15}$  by Time Interval Compared to Overall Mean ( $-2e-04$ ) for  $p = 6$  and  $f(t) = \sqrt{t}$ .

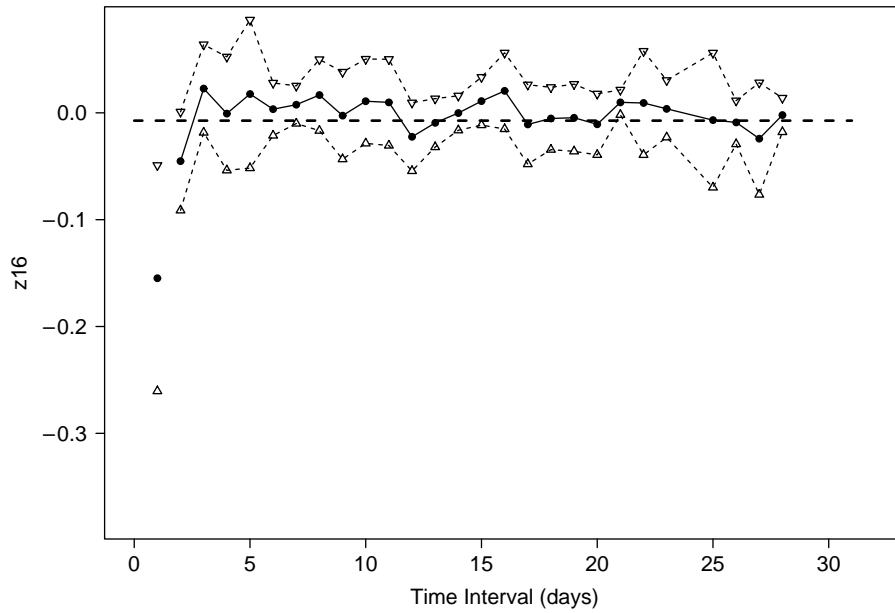

Figure S2.154. MLE of  $z_{16}$  by Time Interval Compared to Overall Mean ( $-0.0073$ ) for  $p = 6$  and  $f(t) = \sqrt{t}$ .

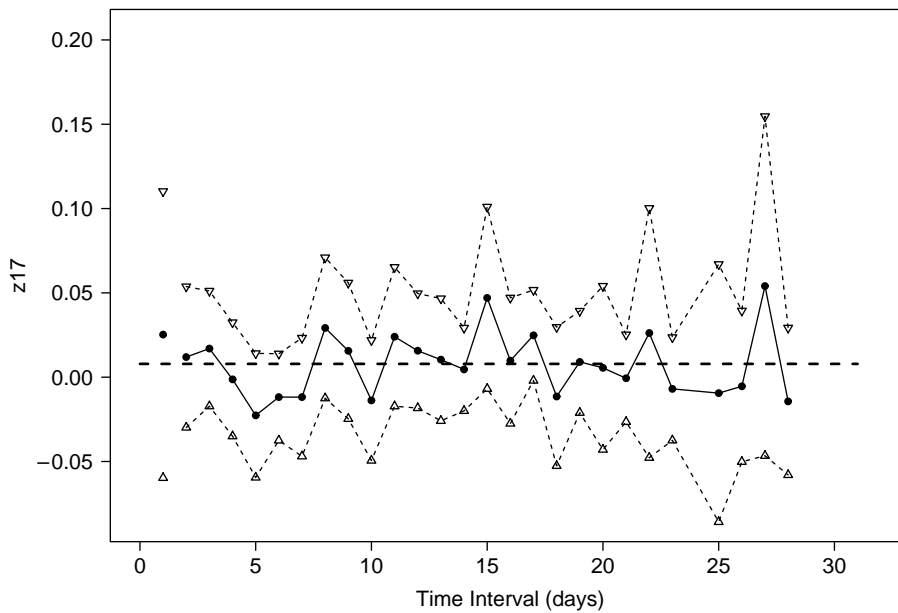

Figure S2.155. MLE of  $z_{17}$  by Time Interval Compared to Overall Mean ( $0.0079$ ) for  $p = 6$  and  $f(t) = \sqrt{t}$ .

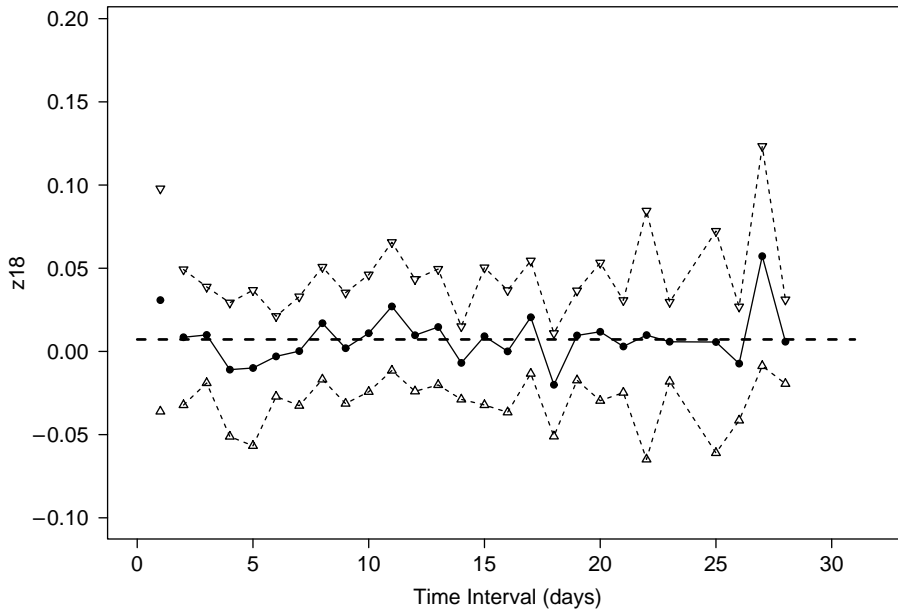

Figure S2.156. MLE of  $z_{18}$  by Time Interval Compared to Overall Mean (0.0072) for  $p = 6$  and  $f(t) = \sqrt{t}$ .

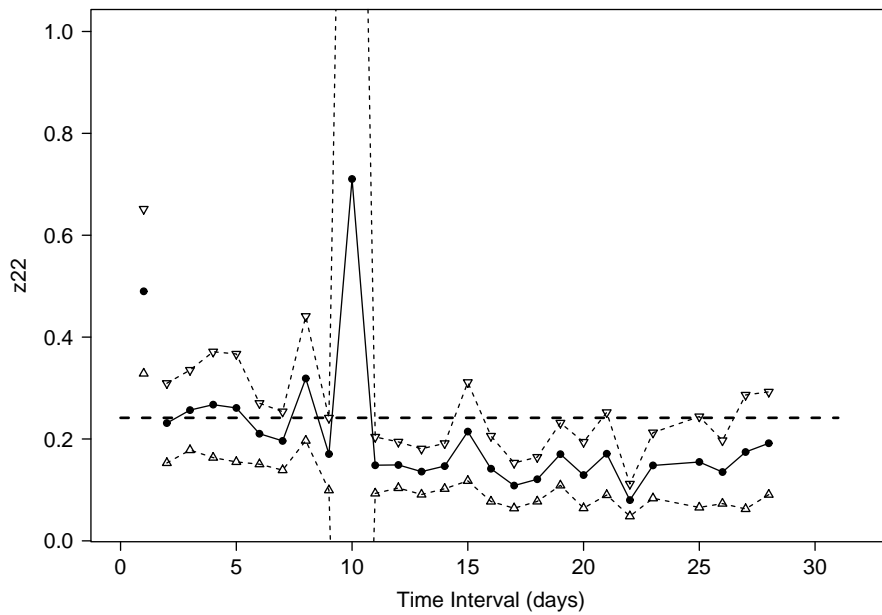

Figure S2.157. MLE of  $z_{22}$  by Time Interval Compared to Overall Mean (0.2415) for  $p = 6$  and  $f(t) = \sqrt{t}$ .

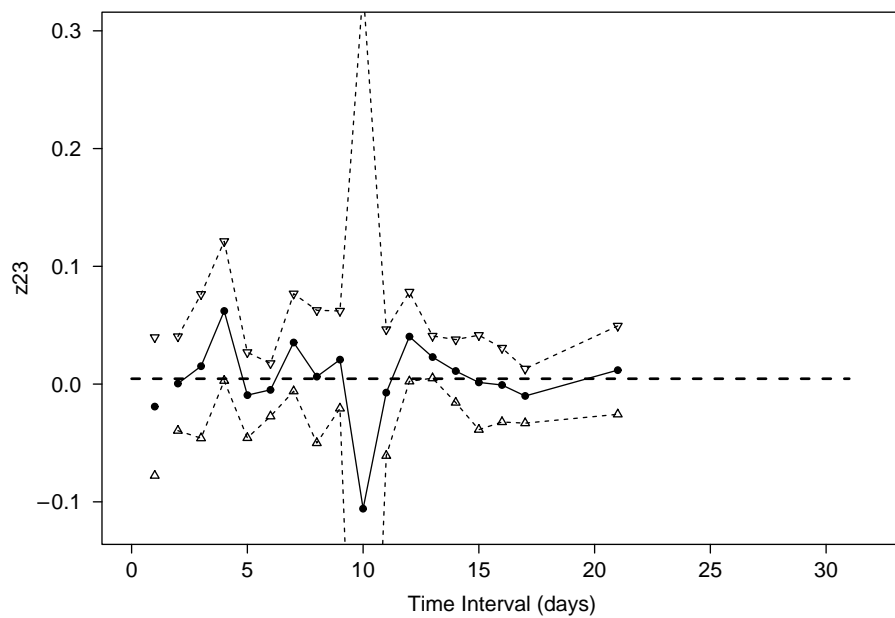

Figure S2.158. MLE of  $z_{23}$  by Time Interval Compared to Overall Mean (0.0045) for  $p = 6$  and  $f(t) = \sqrt{t}$ .

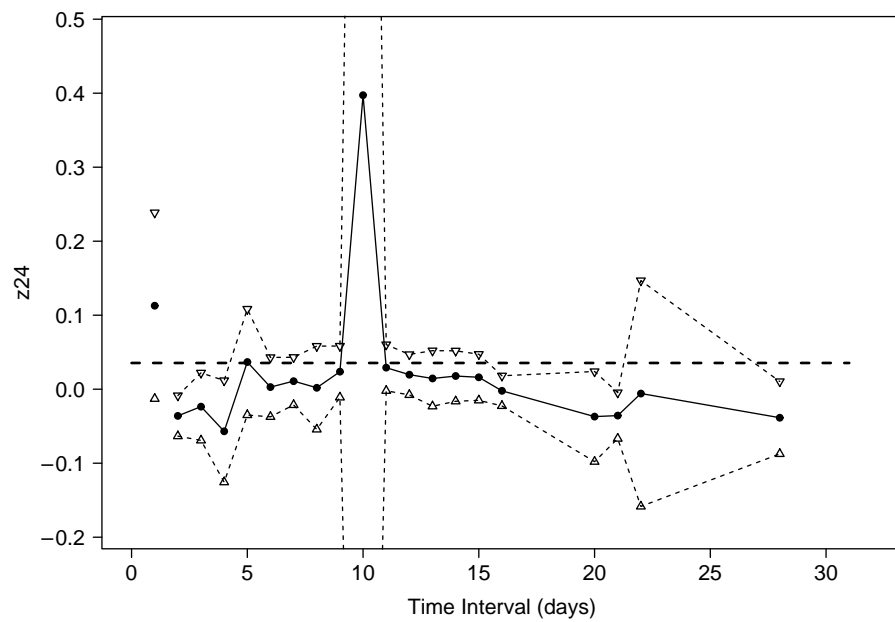

Figure S2.159. MLE of  $z_{24}$  by Time Interval Compared to Overall Mean (0.0355) for  $p = 6$  and  $f(t) = \sqrt{t}$ .

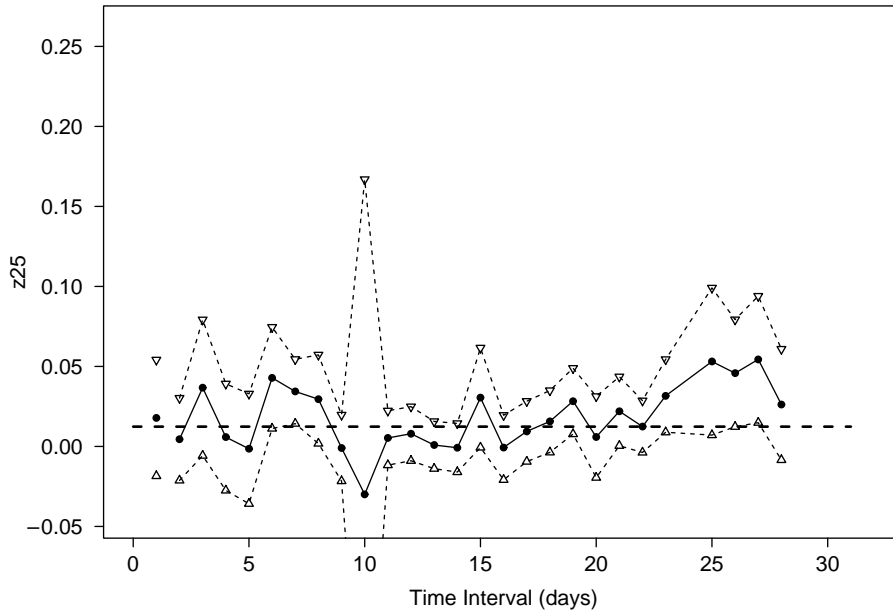

Figure S2.160. MLE of  $z_{25}$  by Time Interval Compared to Overall Mean (0.0124) for  $p = 6$  and  $f(t) = \sqrt{t}$ .

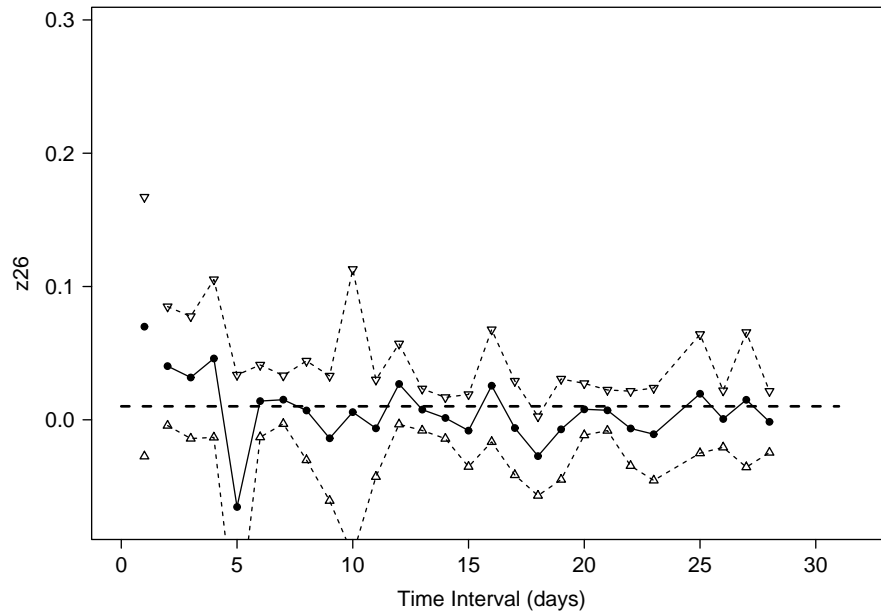

Figure S2.161. MLE of  $z_{26}$  by Time Interval Compared to Overall Mean (0.0101) for  $p = 6$  and  $f(t) = \sqrt{t}$ .

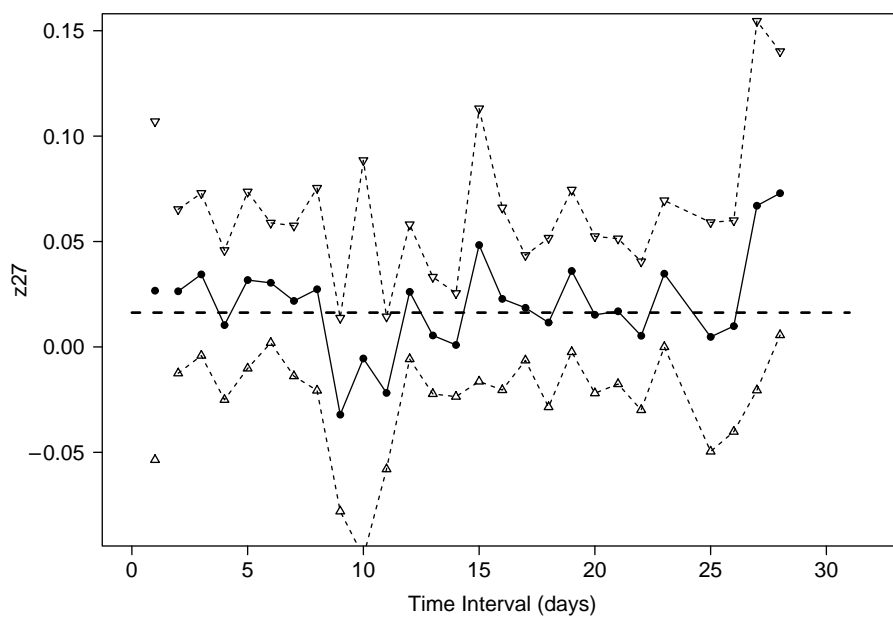

Figure S2.162. MLE of  $z_{27}$  by Time Interval Compared to Overall Mean (0.0163) for  $p = 6$  and  $f(t) = \sqrt{t}$ .

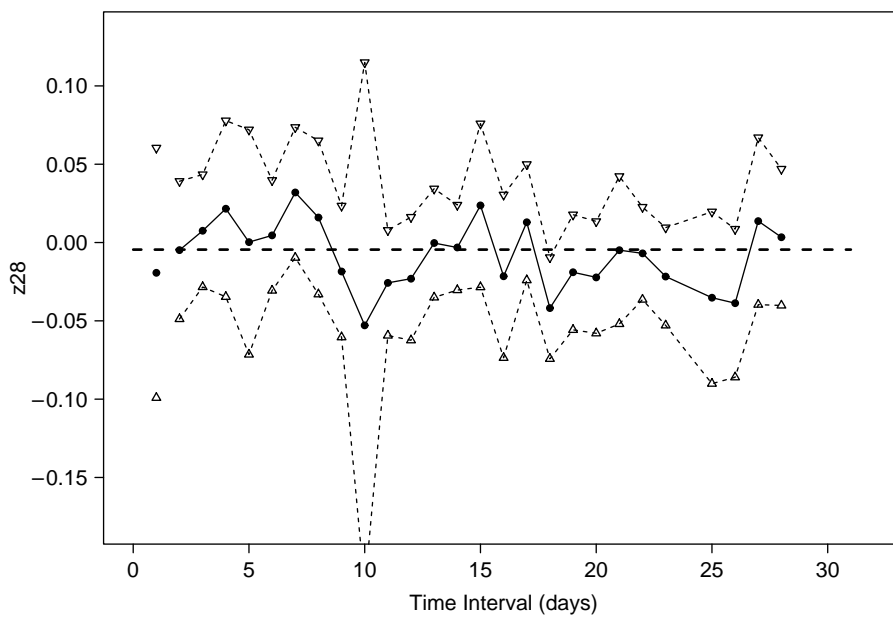

Figure S2.163. MLE of  $z_{28}$  by Time Interval Compared to Overall Mean (-0.0045) for  $p = 6$  and  $f(t) = \sqrt{t}$ .

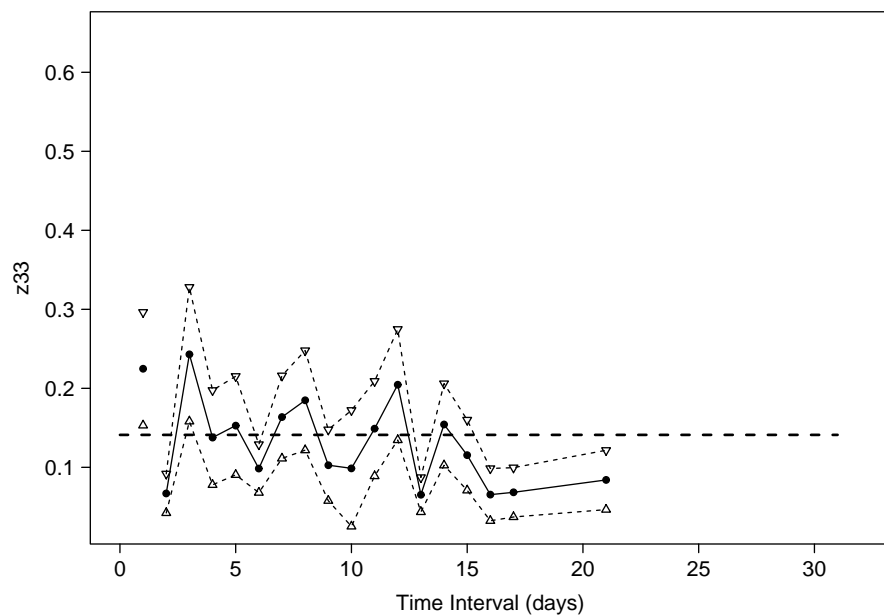

Figure S2.164. MLE of  $z_{33}$  by Time Interval Compared to Overall Mean (0.1411) for  $p = 6$  and  $f(t) = \sqrt{t}$ .

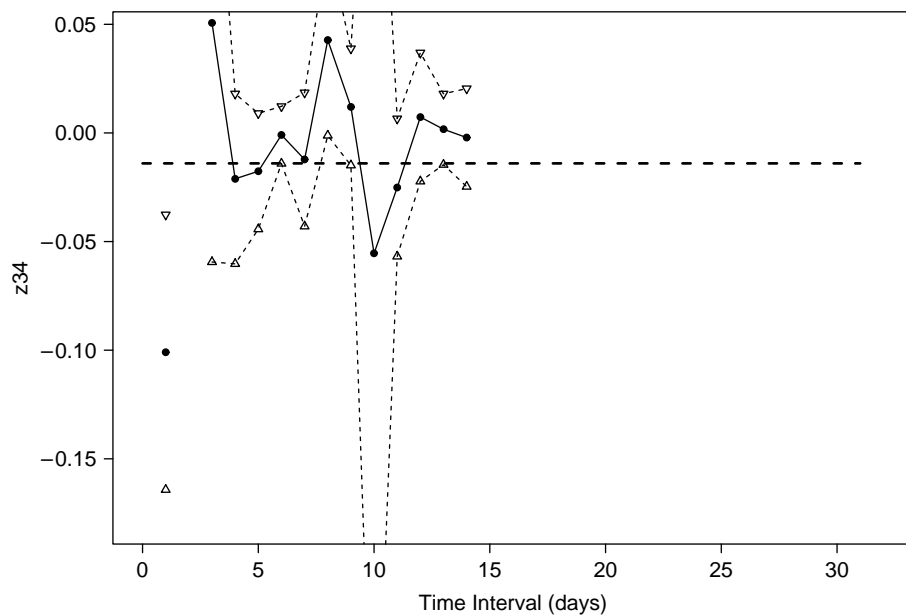

Figure S2.165. MLE of  $z_{34}$  by Time Interval Compared to Overall Mean (-0.014) for  $p = 6$  and  $f(t) = \sqrt{t}$ .



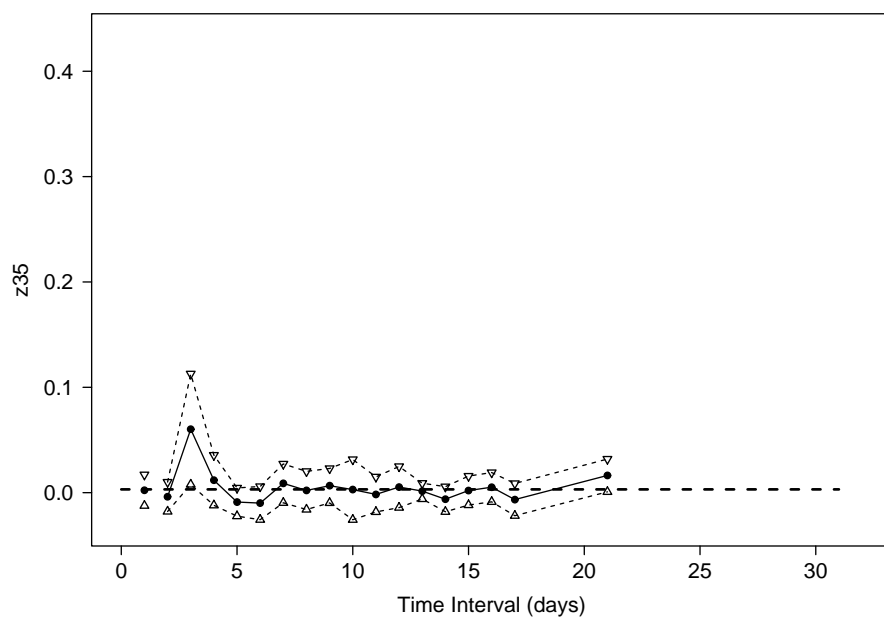

Figure S2.166. MLE of  $z_{35}$  by Time Interval Compared to Overall Mean (0.0031) for  $p = 6$  and  $f(t) = \sqrt{t}$ .

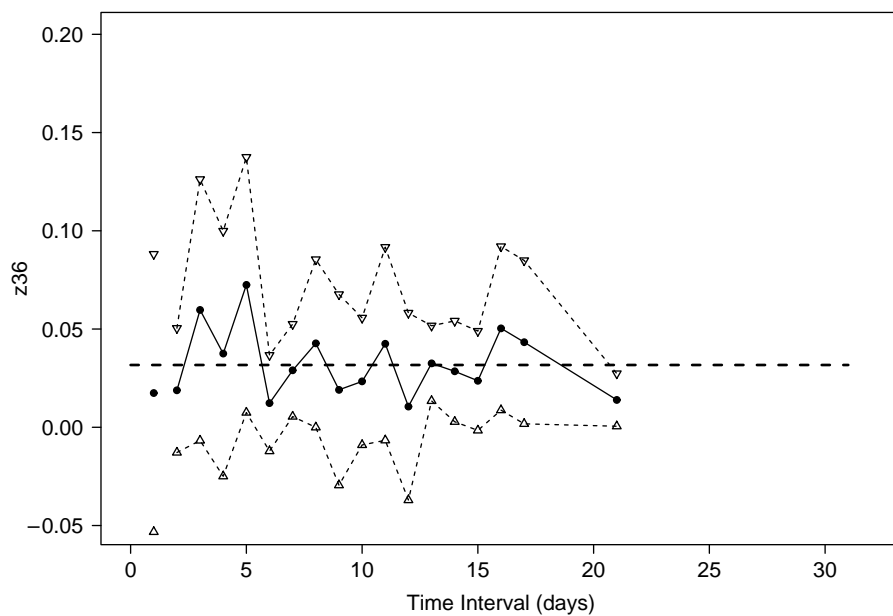

Figure S2.167. MLE of  $z_{36}$  by Time Interval Compared to Overall Mean (0.0317) for  $p = 6$  and  $f(t) = \sqrt{t}$ .

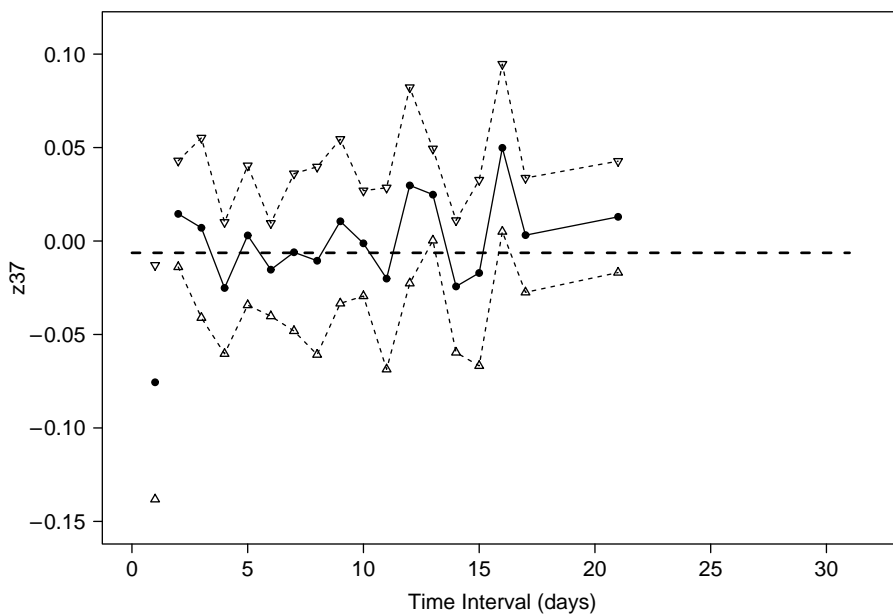

Figure S2.168. MLE of  $z_{37}$  by Time Interval Compared to Overall Mean ( $-0.0063$ ) for  $p = 6$  and  $f(t) = \sqrt{t}$ .

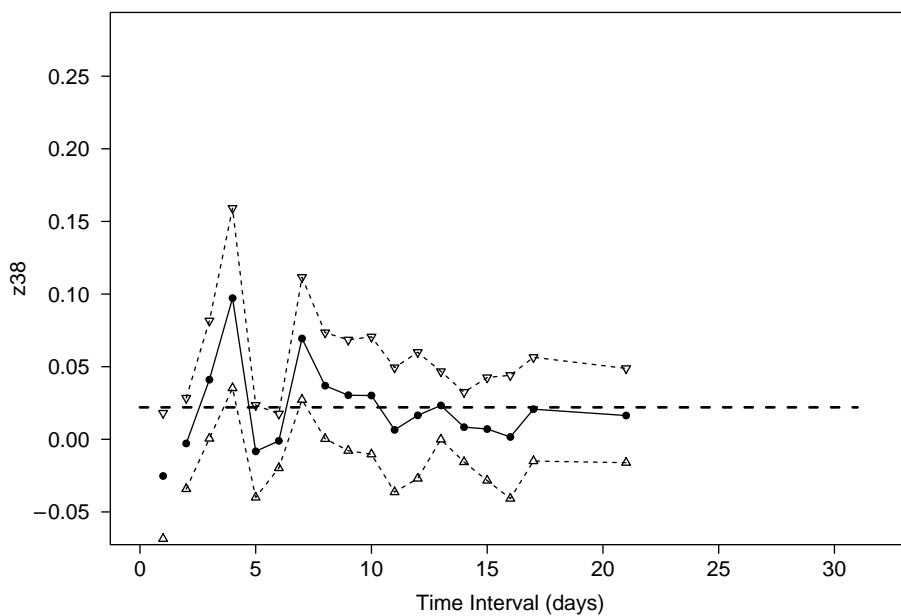

Figure S2.169. MLE of  $z_{38}$  by Time Interval Compared to Overall Mean ( $0.022$ ) for  $p = 6$  and  $f(t) = \sqrt{t}$ .

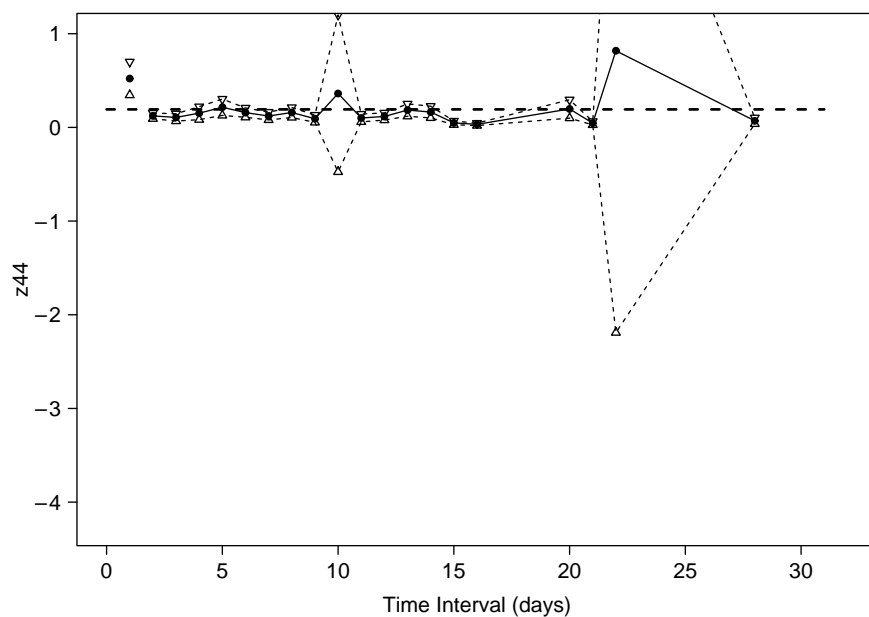

Figure S2.170. MLE of  $z_{44}$  by Time Interval Compared to Overall Mean (0.1921) for  $p = 6$  and  $f(t) = \sqrt{t}$ .

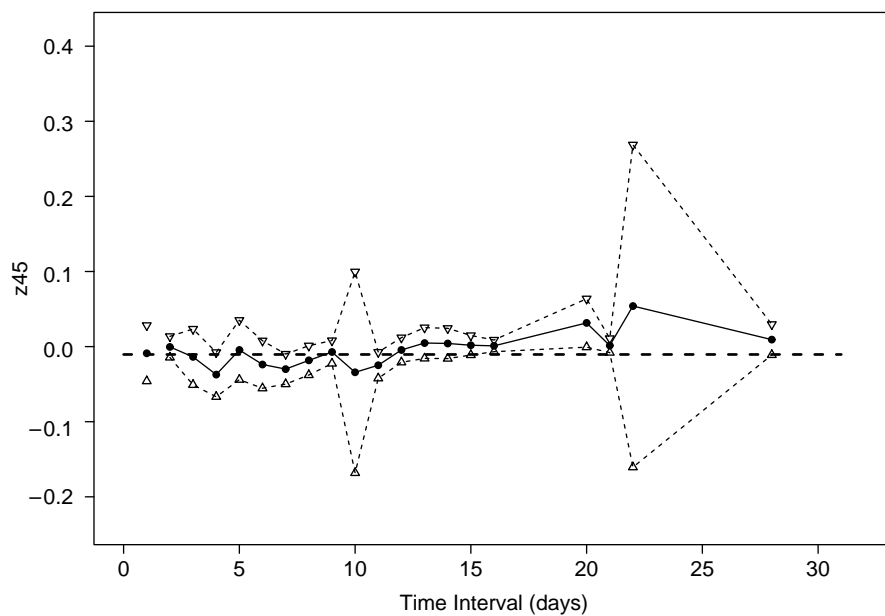

Figure S2.171. MLE of  $z_{45}$  by Time Interval Compared to Overall Mean (-0.0105) for  $p = 6$  and  $f(t) = \sqrt{t}$ .

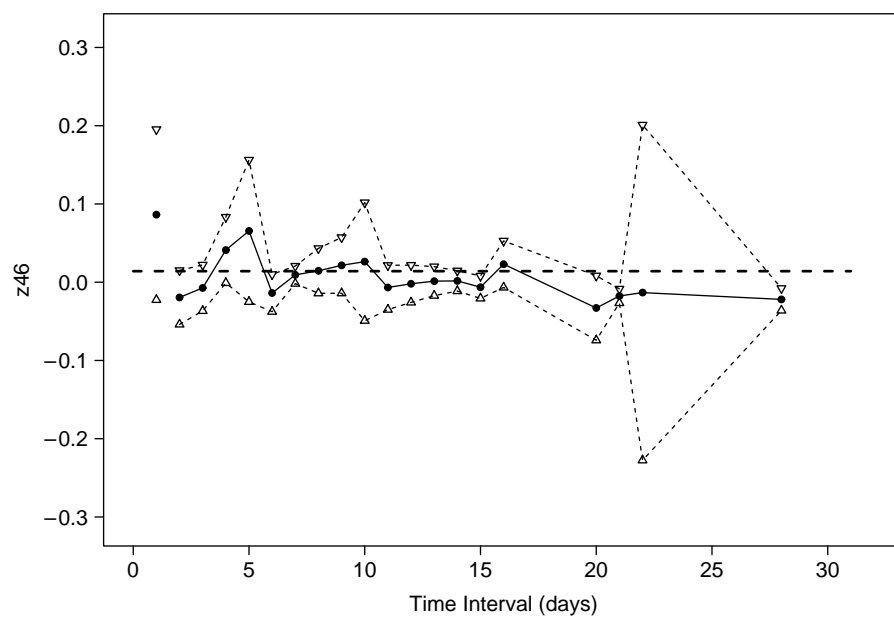

Figure S2.172. MLE of  $z_{46}$  by Time Interval Compared to Overall Mean (0.0141) for  $p = 6$  and  $f(t) = \sqrt{t}$ .

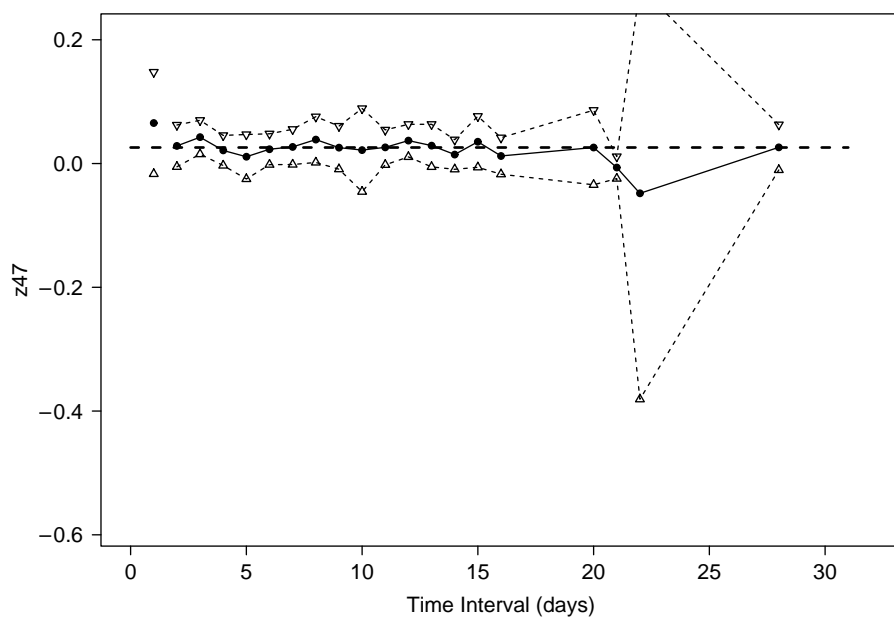

Figure S2.173. MLE of  $z_{47}$  by Time Interval Compared to Overall Mean (0.0259) for  $p = 6$  and  $f(t) = \sqrt{t}$ .

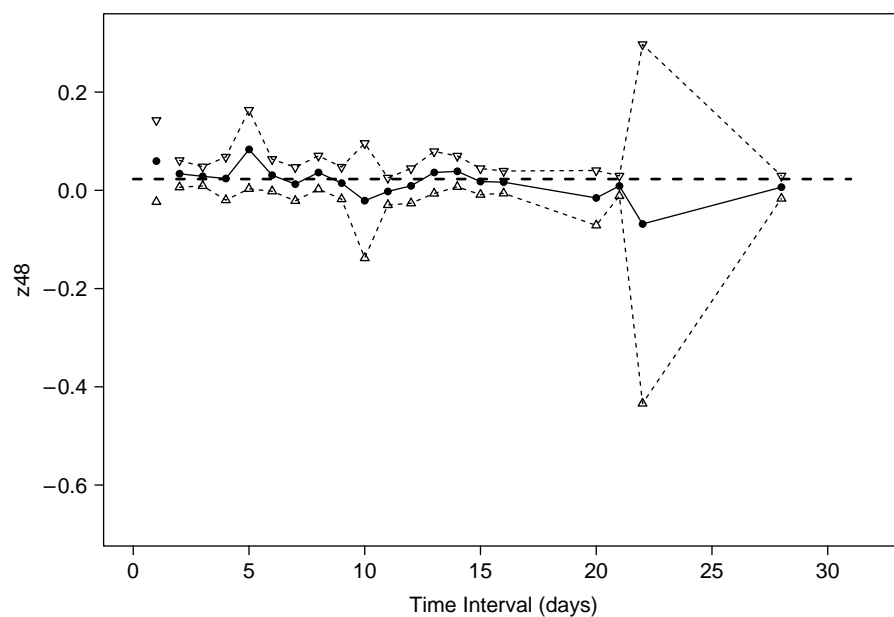

Figure S2.174. MLE of  $z_{48}$  by Time Interval Compared to Overall Mean (0.0229) for  $p = 6$  and  $f(t) = \sqrt{t}$ .

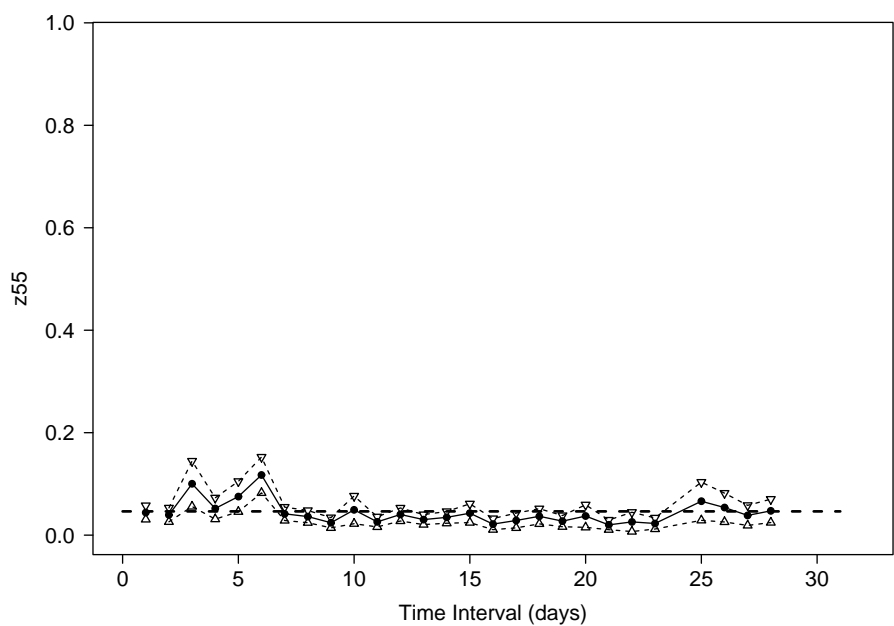

Figure S2.175. MLE of  $z_{55}$  by Time Interval Compared to Overall Mean (0.0464) for  $p = 6$  and  $f(t) = \sqrt{t}$ .

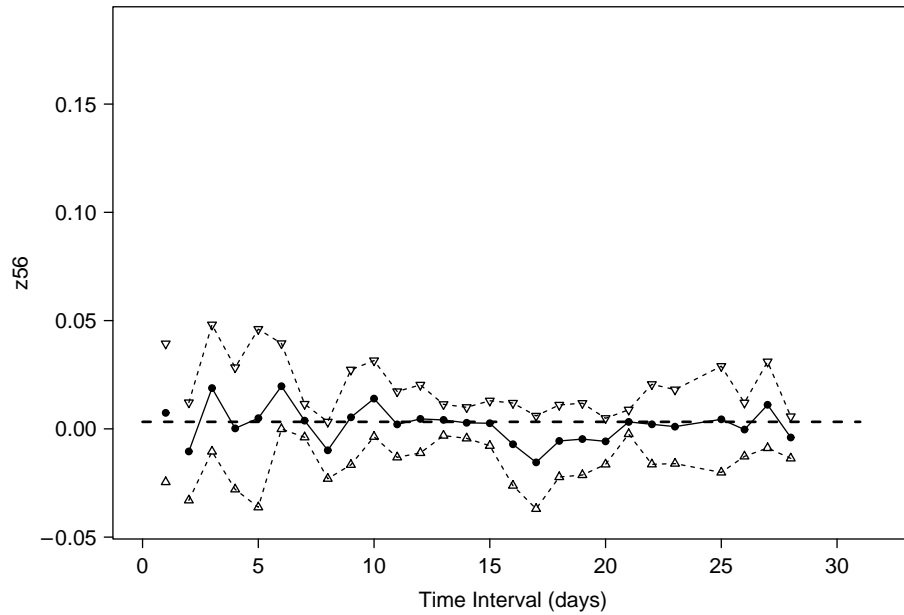

Figure S2.176. MLE of  $z_{56}$  by Time Interval Compared to Overall Mean (0.0032) for  $p = 6$  and  $f(t) = \sqrt{t}$ .

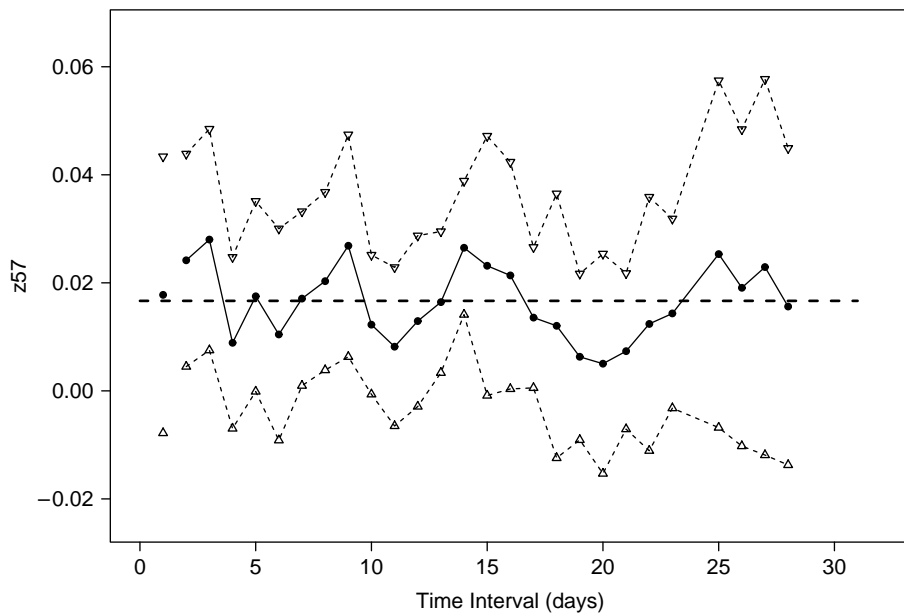

Figure S2.177. MLE of  $z_{57}$  by Time Interval Compared to Overall Mean (0.0167) for  $p = 6$  and  $f(t) = \sqrt{t}$ .

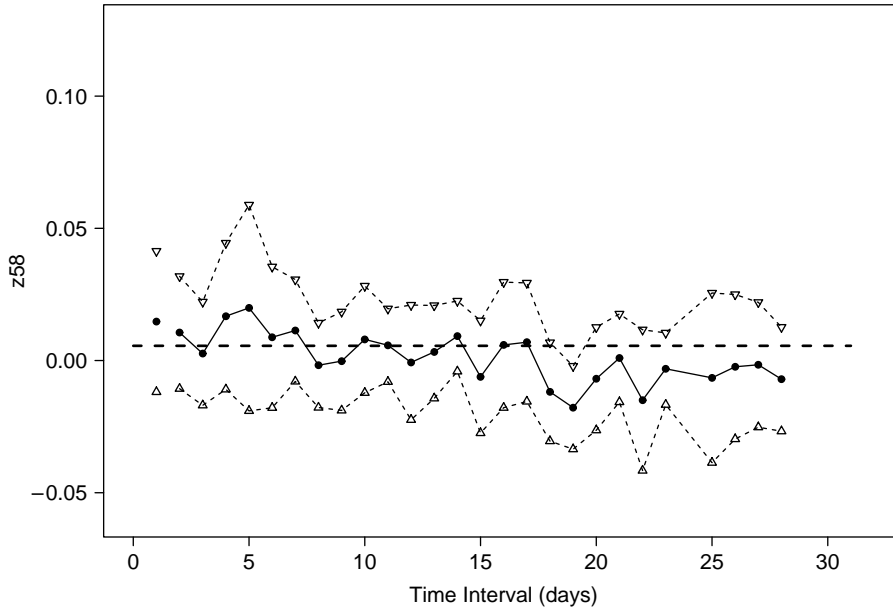

Figure S2.178. MLE of  $z_{58}$  by Time Interval Compared to Overall Mean (0.0056) for  $p = 6$  and  $f(t) = \sqrt{t}$ .

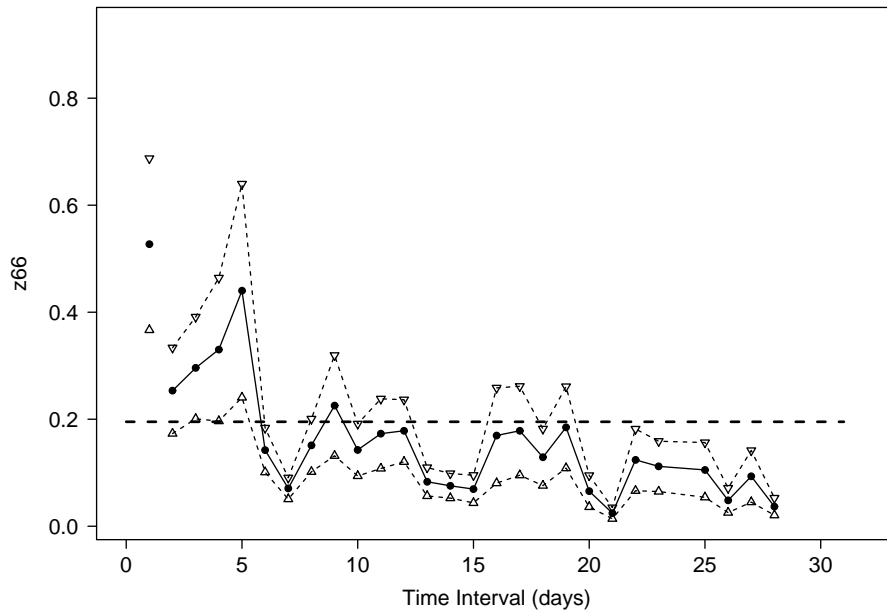

Figure S2.179. MLE of  $z_{66}$  by Time Interval Compared to Overall Mean (0.1952) for  $p = 6$  and  $f(t) = \sqrt{t}$ .

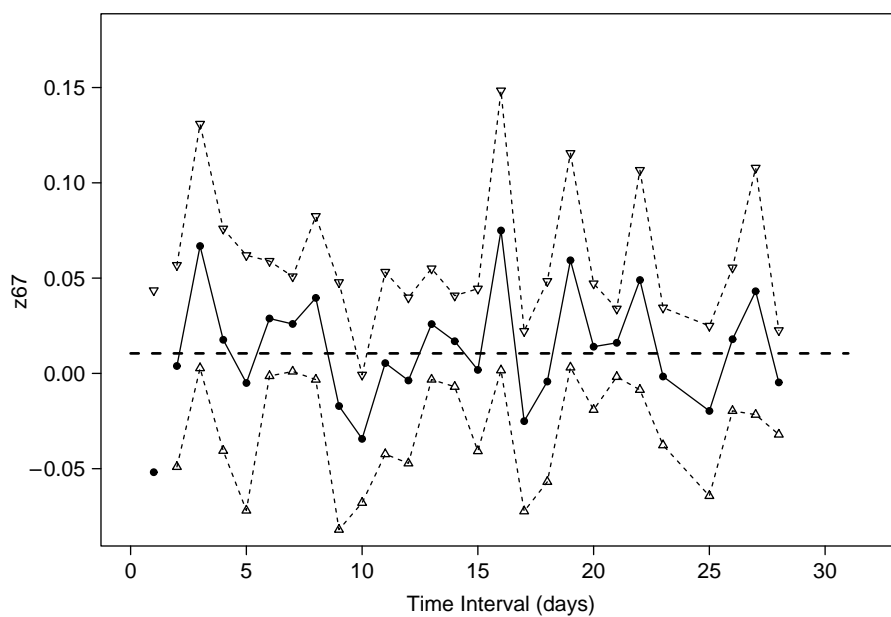

Figure S2.180. MLE of  $z_{67}$  by Time Interval Compared to Overall Mean (0.0105) for  $p = 6$  and  $f(t) = \sqrt{t}$ .

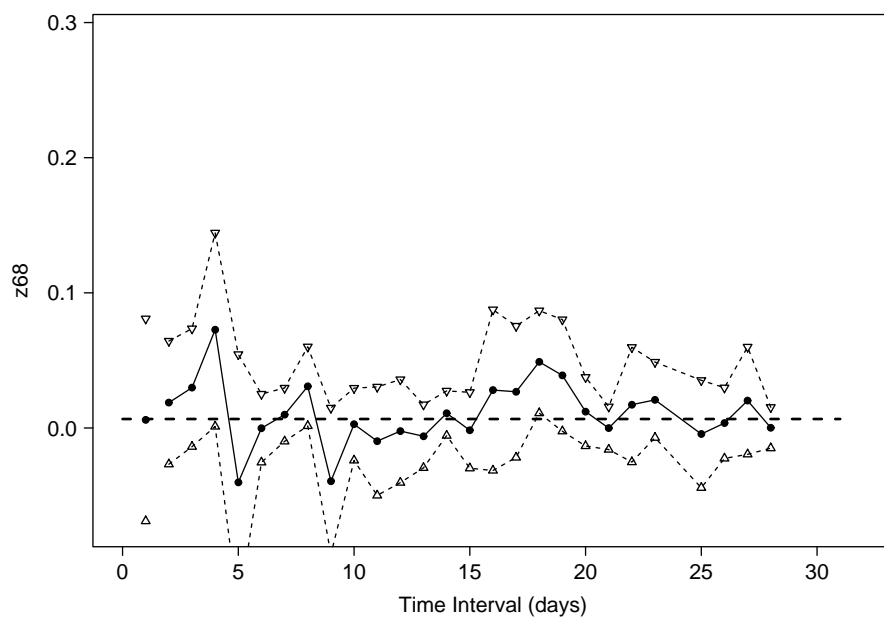

Figure S2.181. MLE of  $z_{68}$  by Time Interval Compared to Overall Mean (0.0066) for  $p = 6$  and  $f(t) = \sqrt{t}$ .



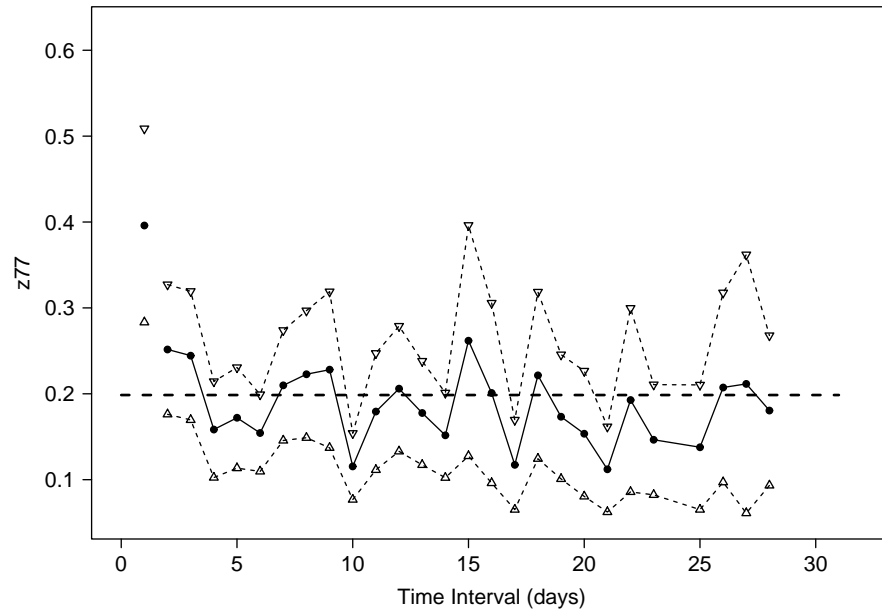

Figure S2.182. MLE of  $z_{77}$  by Time Interval Compared to Overall Mean (0.1986) for  $p = 6$  and  $f(t) = \sqrt{t}$ .

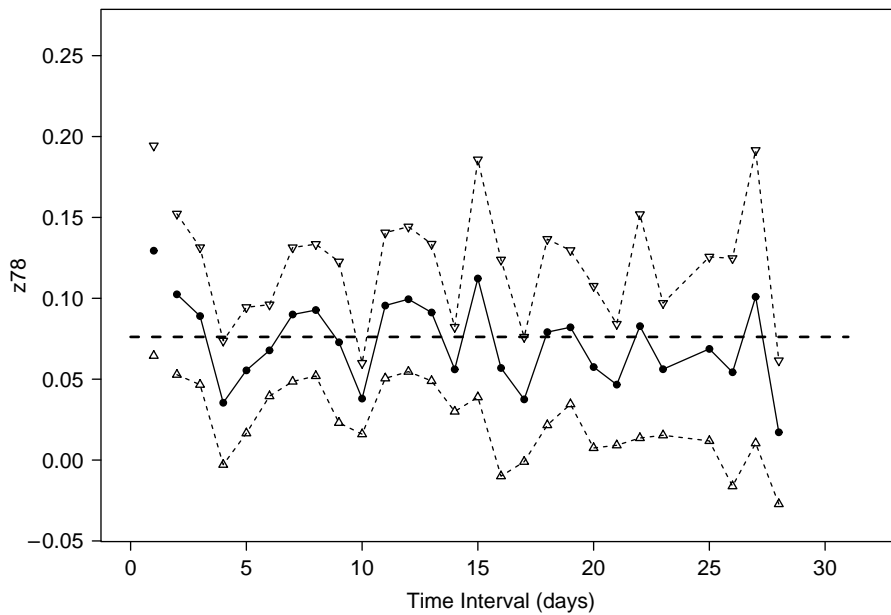

Figure S2.183. MLE of  $z_{78}$  by Time Interval Compared to Overall Mean (0.0761) for  $p = 6$  and  $f(t) = \sqrt{t}$ .

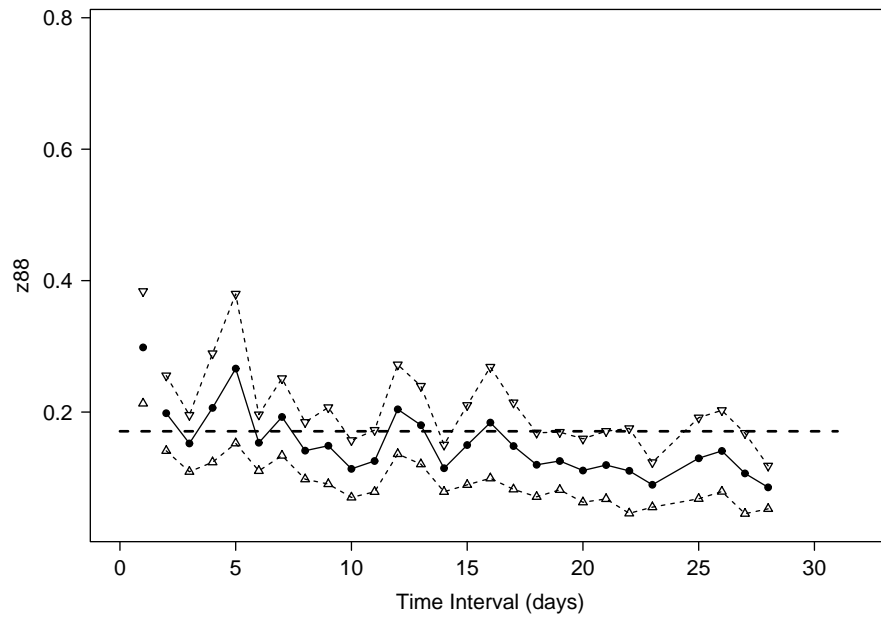

Figure S2.184. MLE of  $z_{88}$  by Time Interval Compared to Overall Mean (0.1708) for  $p = 6$  and  $f(t) = \sqrt{t}$ .

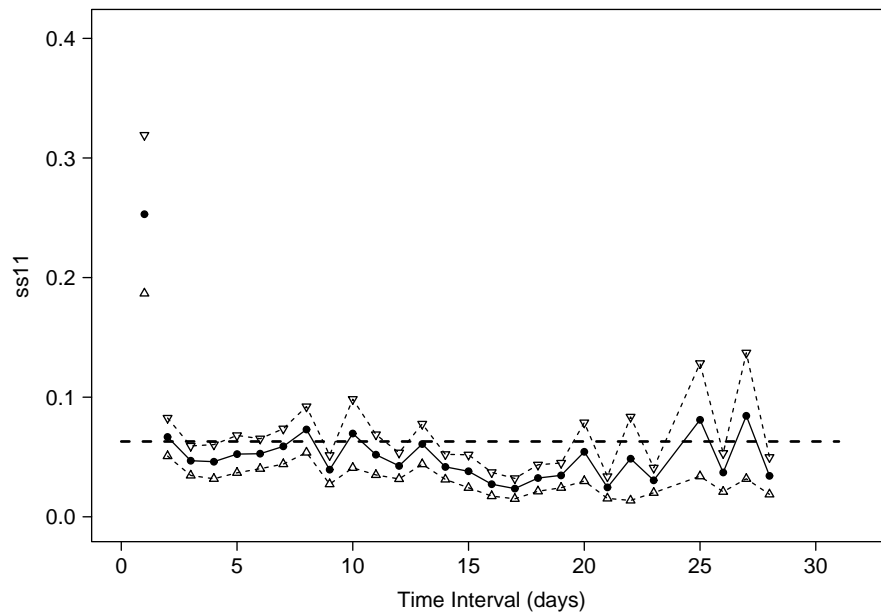

Figure S2.185. MLE of  $ss_{11}$  by Time Interval Compared to Overall Mean (0.063) for  $p = 6$  and  $f(t) = \sqrt{t}$ .

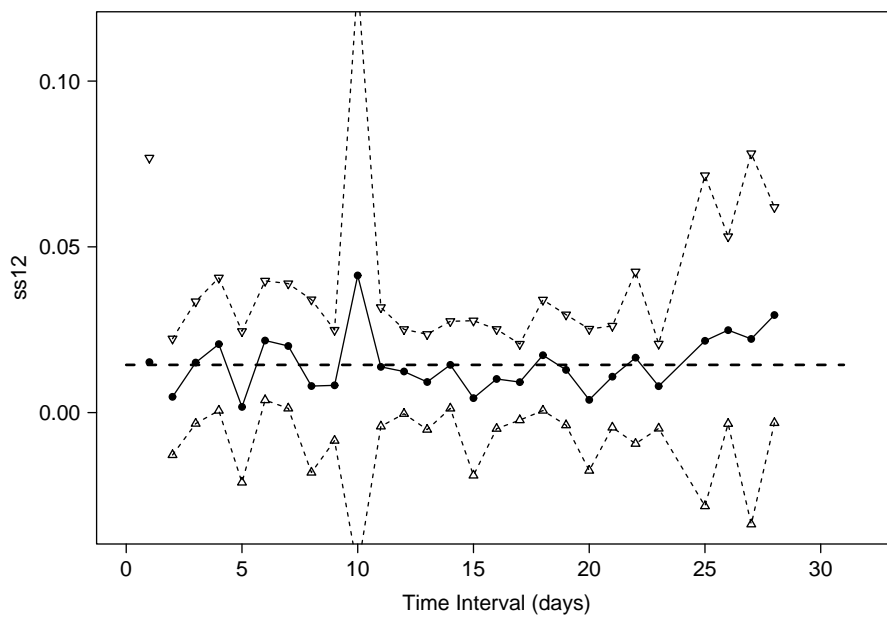

Figure S2.186. MLE of  $ss_{12}$  by Time Interval Compared to Overall Mean (0.0144) for  $p = 6$  and  $f(t) = \sqrt{t}$ .

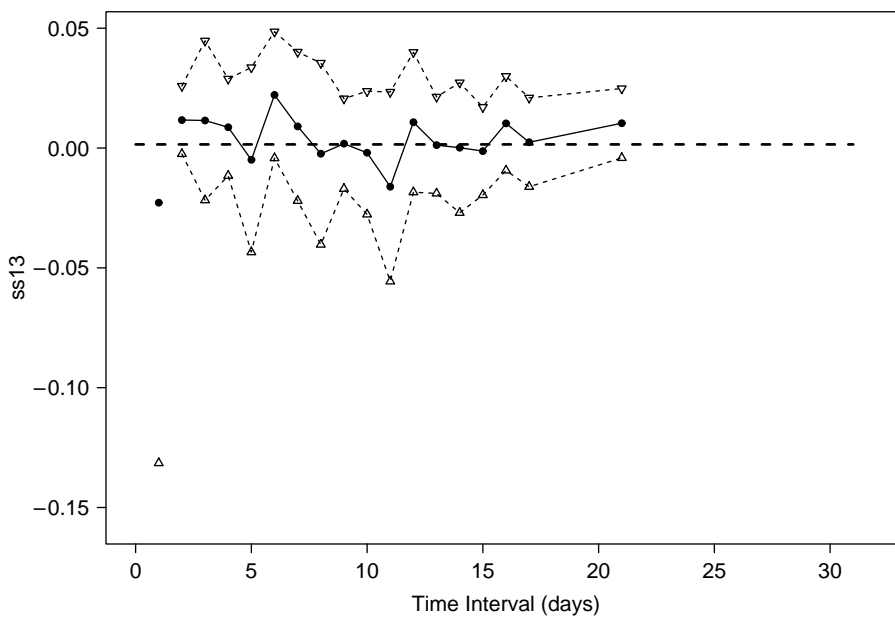

Figure S2.187. MLE of  $ss_{13}$  by Time Interval Compared to Overall Mean (0.0015) for  $p = 6$  and  $f(t) = \sqrt{t}$ .

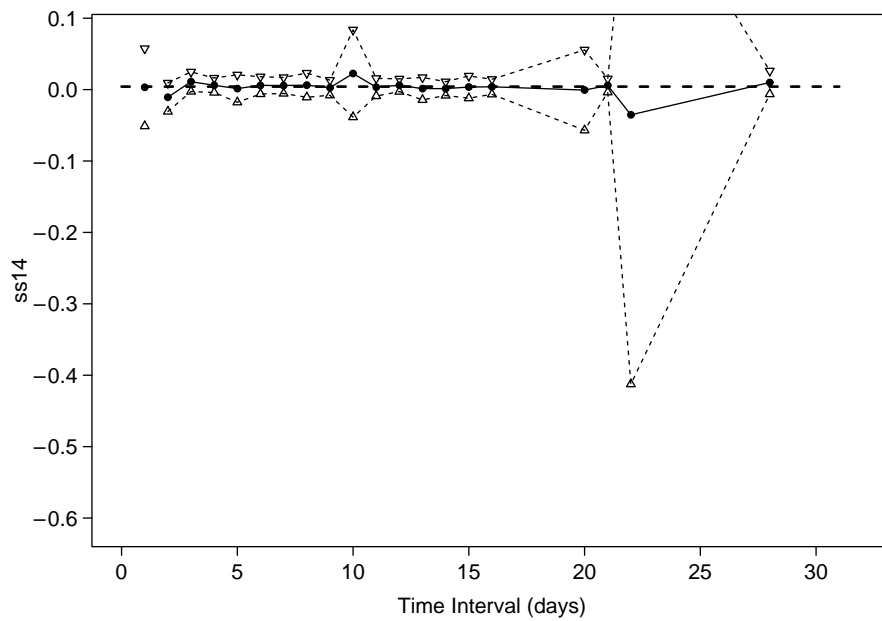

Figure S2.188. MLE of  $ss_{14}$  by Time Interval Compared to Overall Mean (0.0042) for  $p = 6$  and  $f(t) = \sqrt{t}$ .

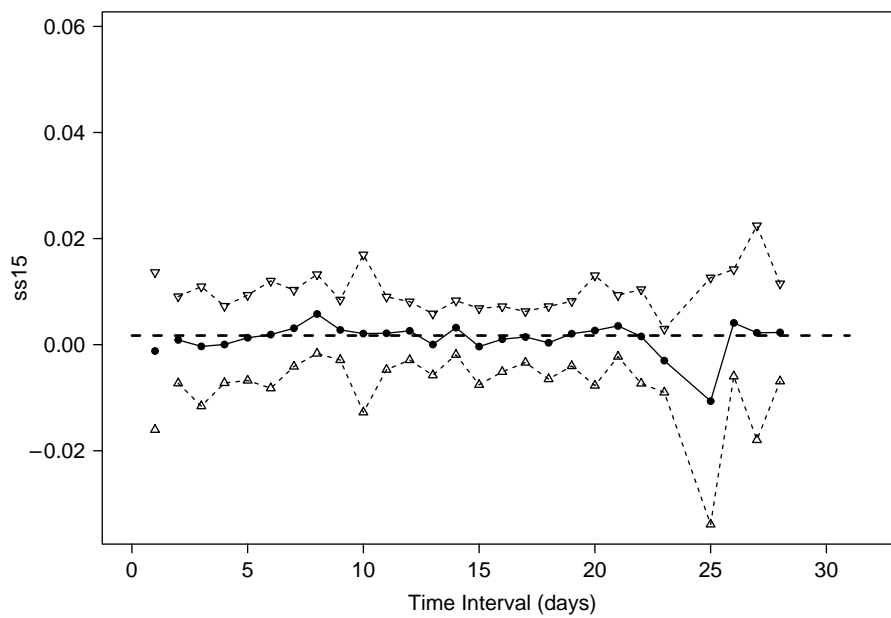

Figure S2.189. MLE of  $ss_{15}$  by Time Interval Compared to Overall Mean (0.0017) for  $p = 6$  and  $f(t) = \sqrt{t}$ .

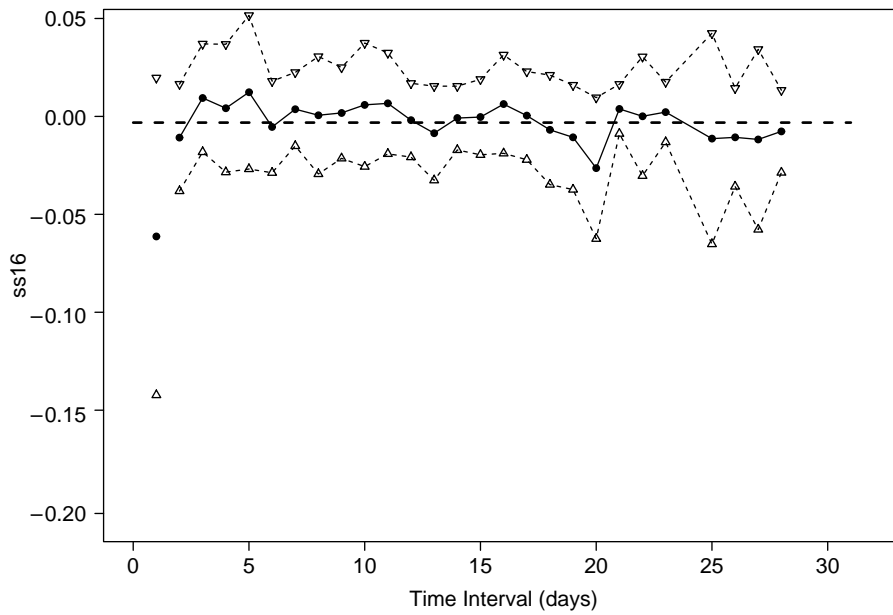

Figure S2.190. MLE of  $ss16$  by Time Interval Compared to Overall Mean ( $-0.0032$ ) for  $p = 6$  and  $f(t) = \sqrt{t}$ .

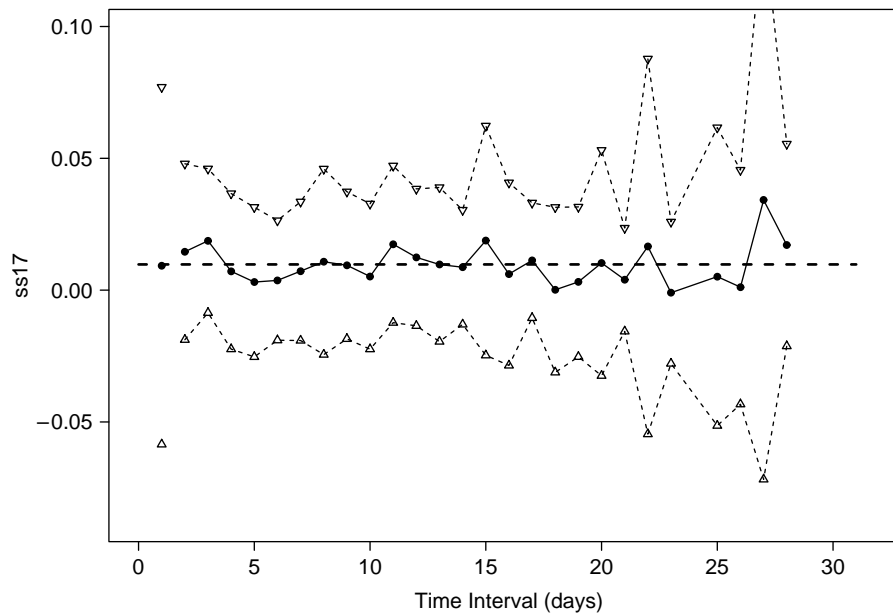

Figure S2.191. MLE of  $ss17$  by Time Interval Compared to Overall Mean ( $0.0098$ ) for  $p = 6$  and  $f(t) = \sqrt{t}$ .

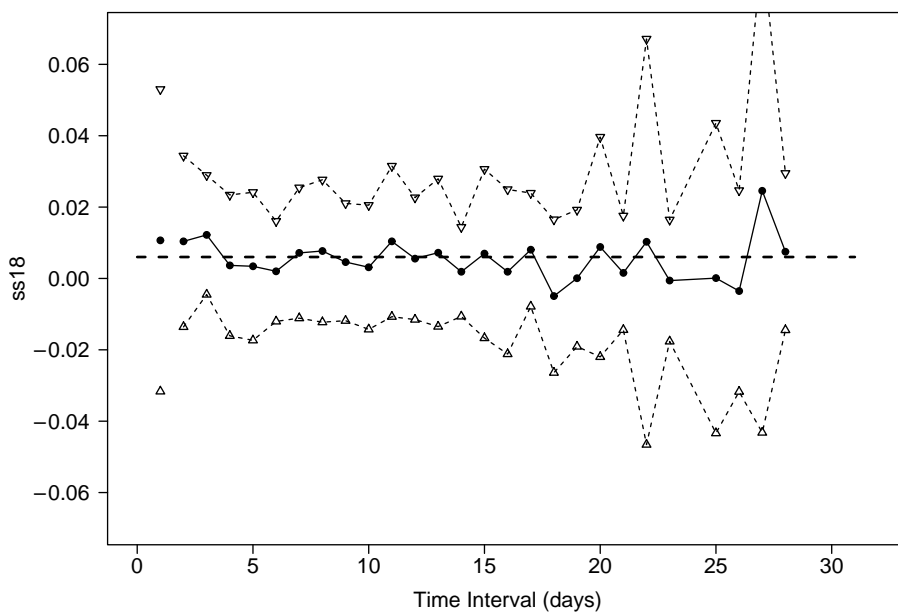

Figure S2.192. MLE of  $ss18$  by Time Interval Compared to Overall Mean (0.006) for  $p = 6$  and  $f(t) = \sqrt{t}$ .

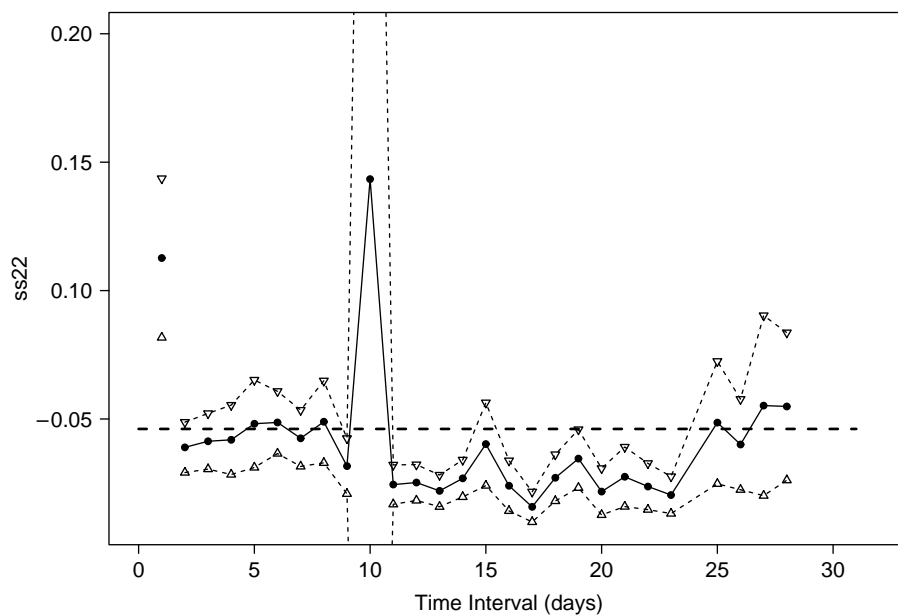

Figure S2.193. MLE of  $ss22$  by Time Interval Compared to Overall Mean (0.0461) for  $p = 6$  and  $f(t) = \sqrt{t}$ .

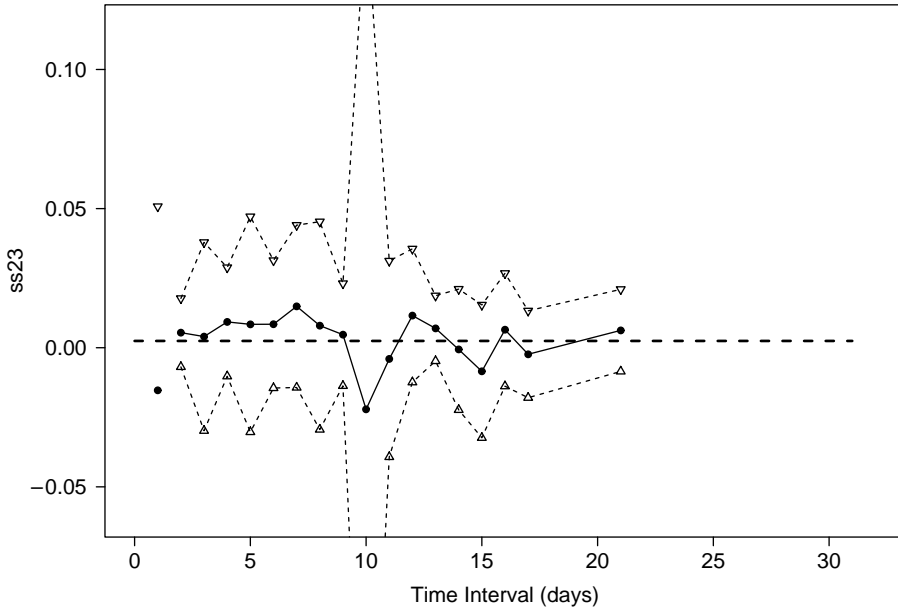

Figure S2.194. MLE of  $ss_{23}$  by Time Interval Compared to Overall Mean (0.0024) for  $p = 6$  and  $f(t) = \sqrt{t}$ .

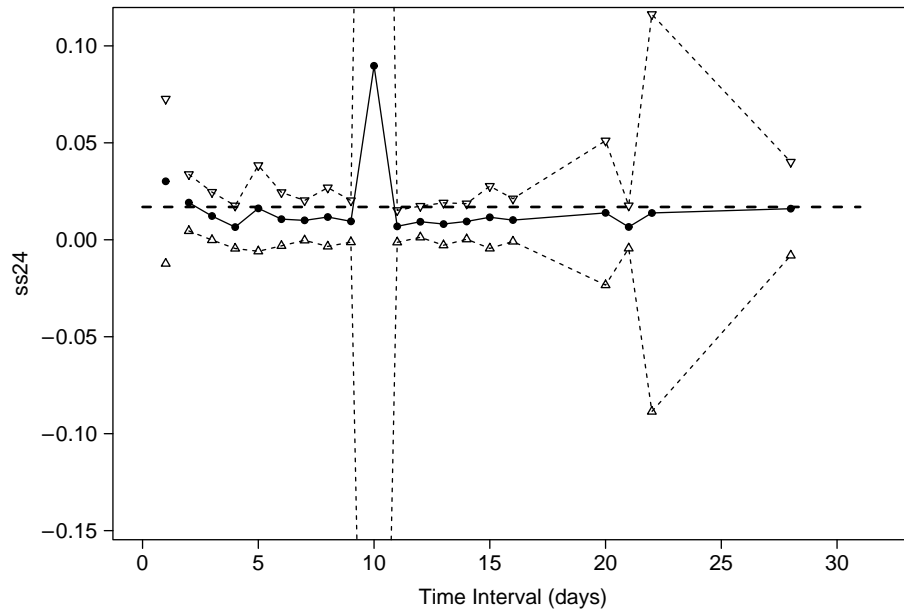

Figure S2.195. MLE of  $ss_{24}$  by Time Interval Compared to Overall Mean (0.0169) for  $p = 6$  and  $f(t) = \sqrt{t}$ .

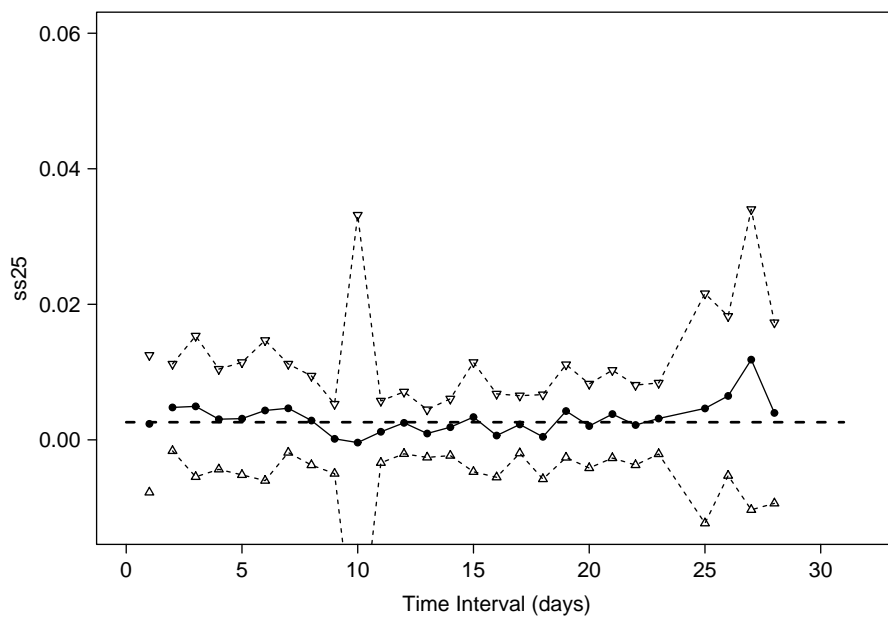

Figure S2.196. MLE of  $ss_{25}$  by Time Interval Compared to Overall Mean (0.0026) for  $p = 6$  and  $f(t) = \sqrt{t}$ .

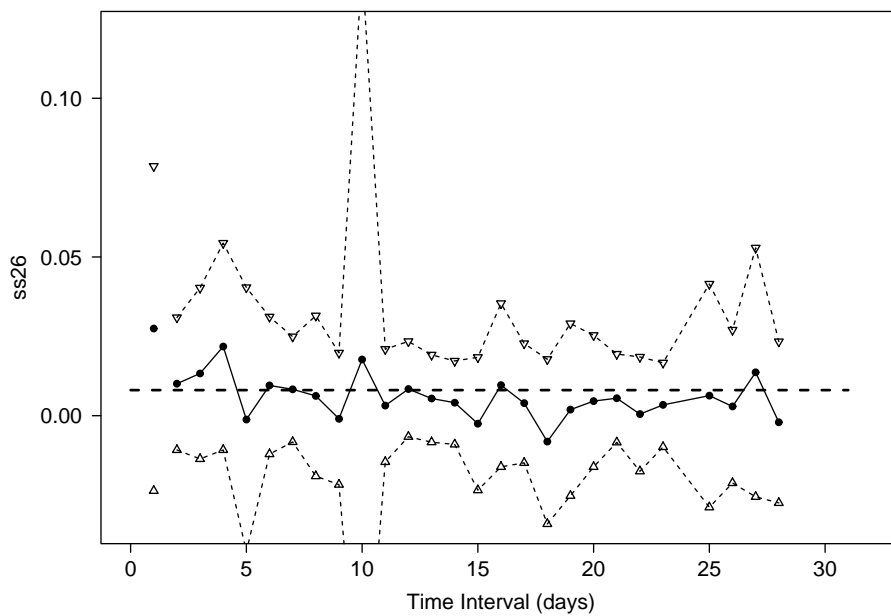

Figure S2.197. MLE of  $ss_{26}$  by Time Interval Compared to Overall Mean (0.0081) for  $p = 6$  and  $f(t) = \sqrt{t}$ .



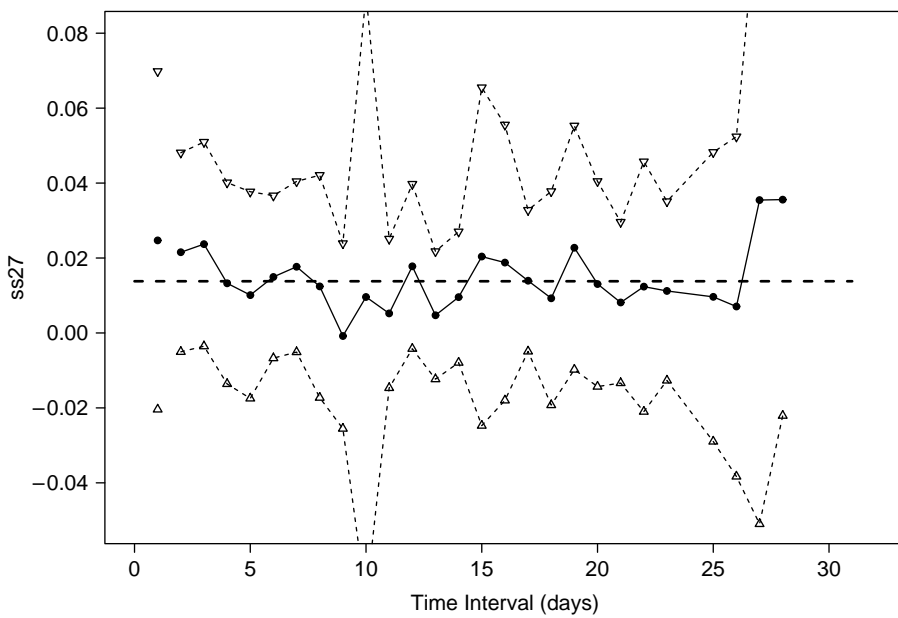

Figure S2.198. MLE of  $ss_{27}$  by Time Interval Compared to Overall Mean (0.0138) for  $p = 6$  and  $f(t) = \sqrt{t}$ .

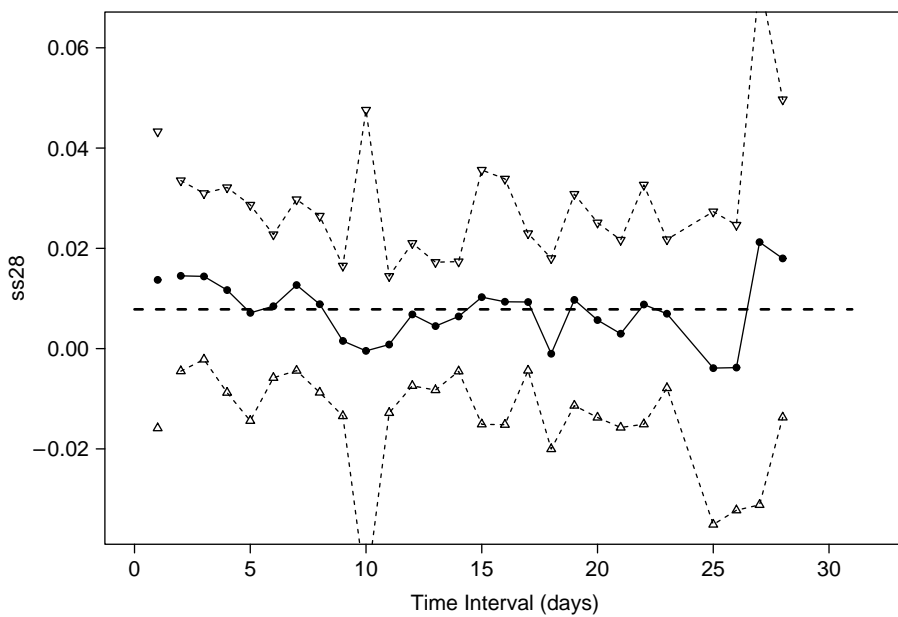

Figure S2.199. MLE of  $ss_{28}$  by Time Interval Compared to Overall Mean (0.0078) for  $p = 6$  and  $f(t) = \sqrt{t}$ .

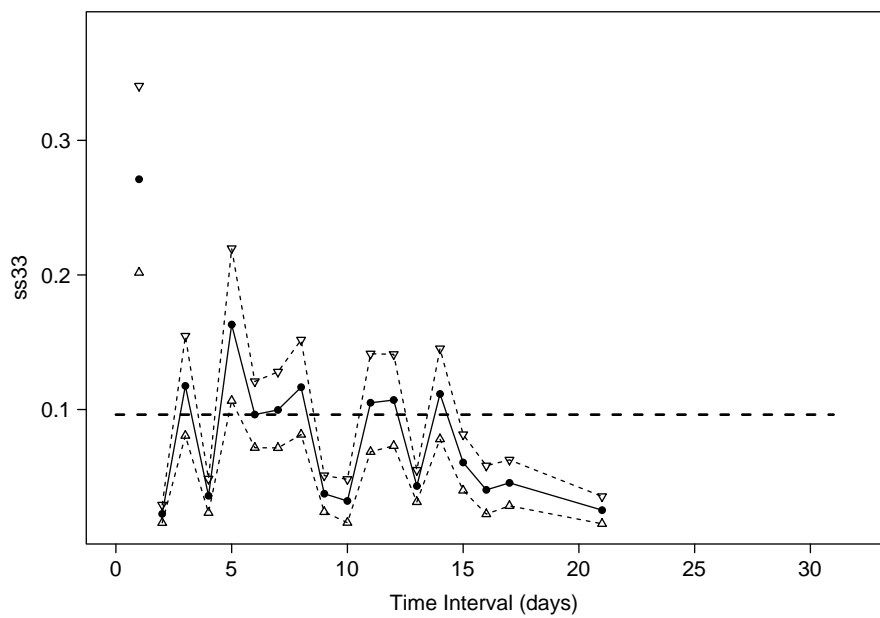

Figure S2.200. MLE of  $ss_{33}$  by Time Interval Compared to Overall Mean (0.0962) for  $p = 6$  and  $f(t) = \sqrt{t}$ .

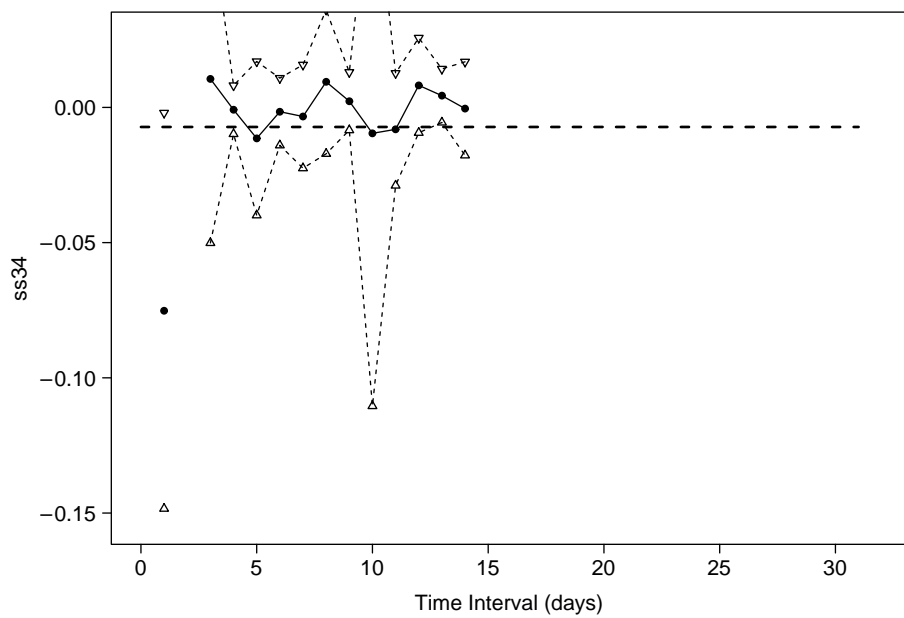

Figure S2.201. MLE of  $ss_{34}$  by Time Interval Compared to Overall Mean ( $-0.0072$ ) for  $p = 6$  and  $f(t) = \sqrt{t}$ .

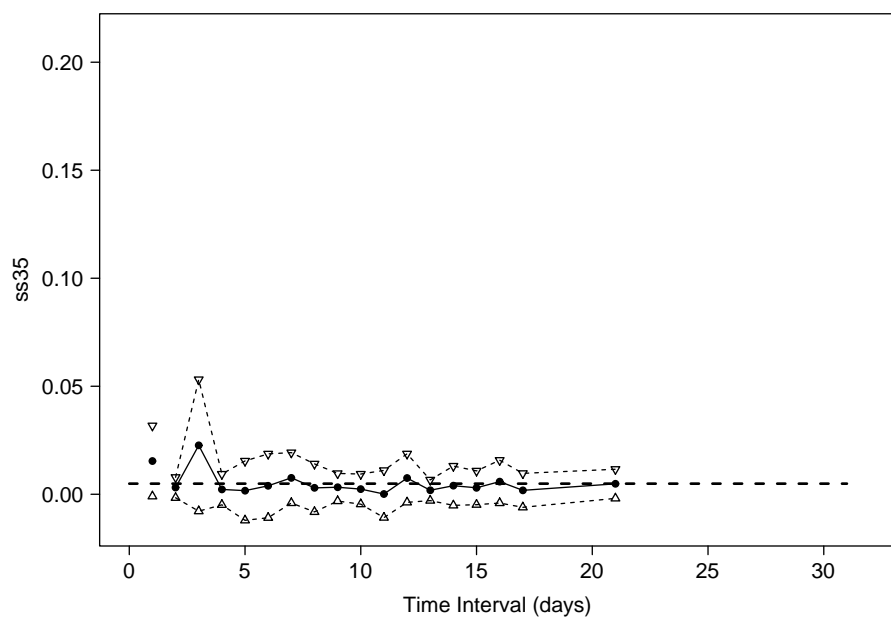

Figure S2.202. MLE of  $ss35$  by Time Interval Compared to Overall Mean (0.0049) for  $p = 6$  and  $f(t) = \sqrt{t}$ .

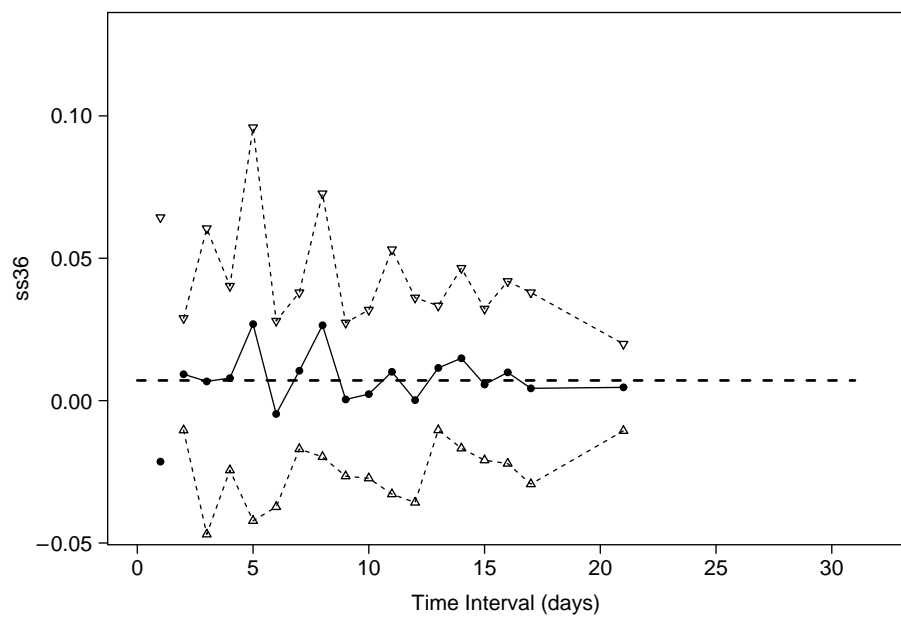

Figure S2.203. MLE of  $ss36$  by Time Interval Compared to Overall Mean (0.0071) for  $p = 6$  and  $f(t) = \sqrt{t}$ .

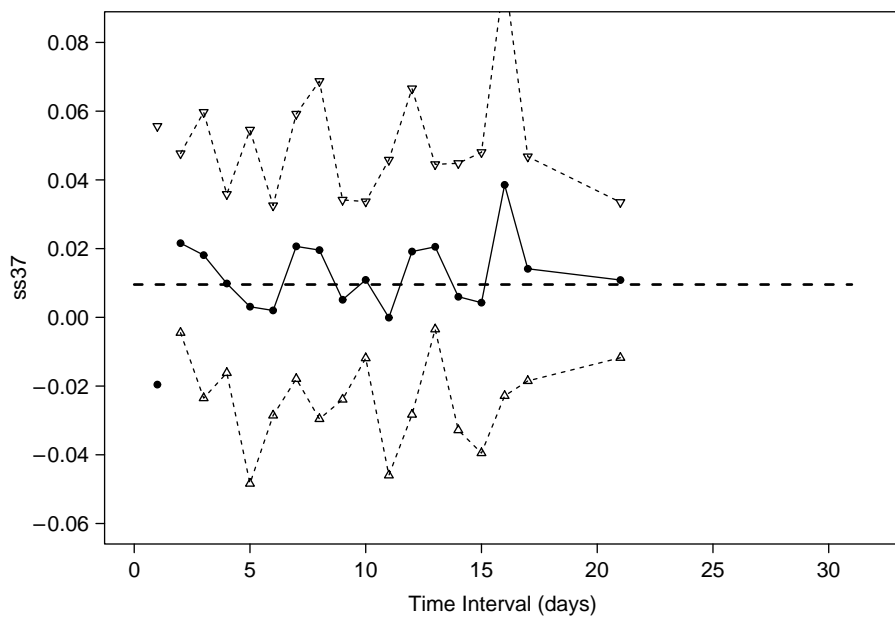

Figure S2.204. MLE of ss37 by Time Interval Compared to Overall Mean (0.0095) for  $p = 6$  and  $f(t) = \sqrt{t}$ .

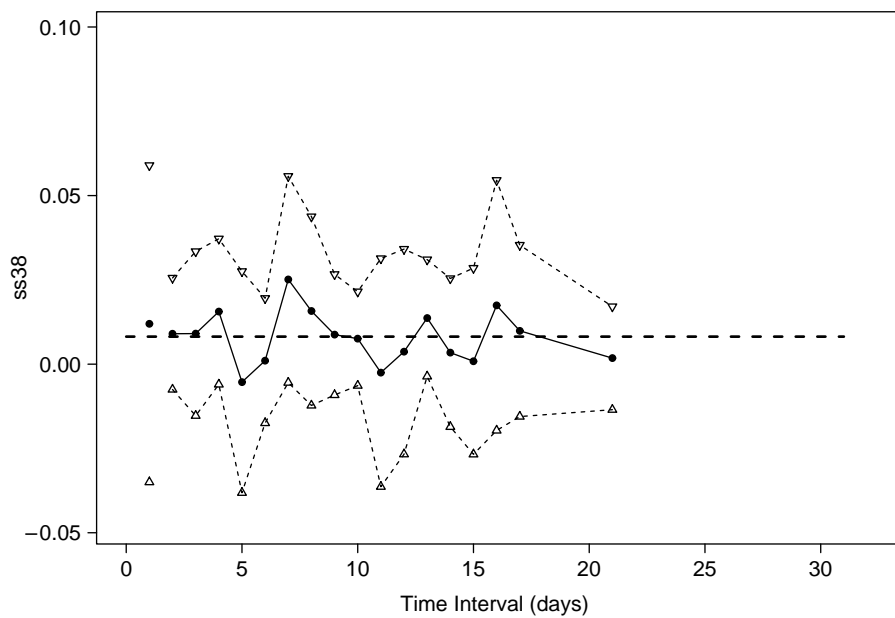

Figure S2.205. MLE of ss38 by Time Interval Compared to Overall Mean (0.0082) for  $p = 6$  and  $f(t) = \sqrt{t}$ .

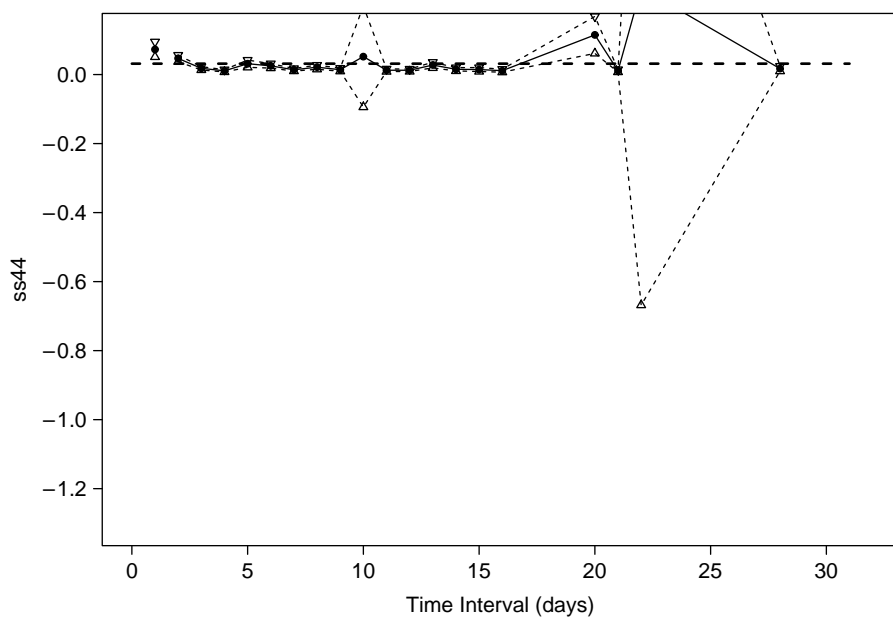

Figure S2.206. MLE of  $ss_{44}$  by Time Interval Compared to Overall Mean (0.0316) for  $p = 6$  and  $f(t) = \sqrt{t}$ .

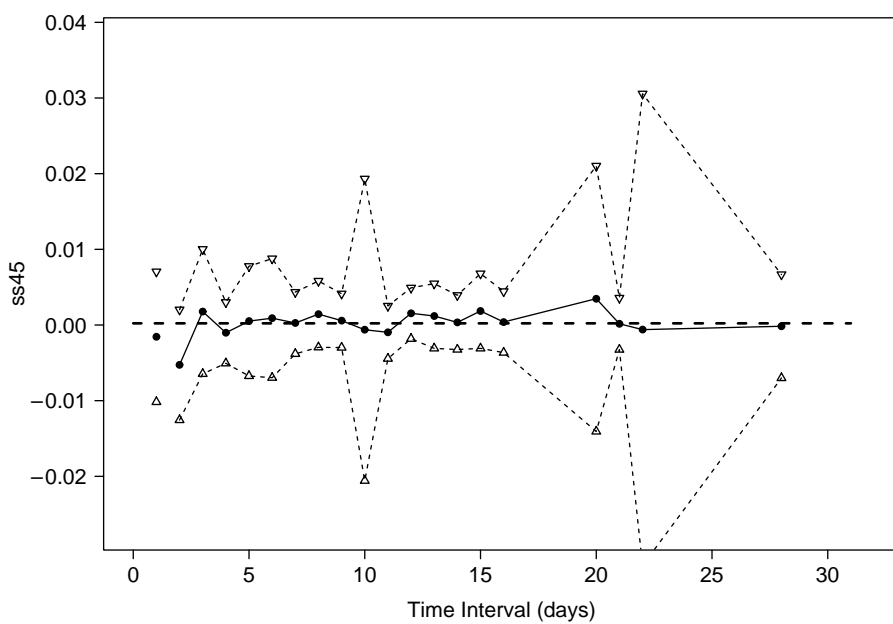

Figure S2.207. MLE of  $ss_{45}$  by Time Interval Compared to Overall Mean ( $2e-04$ ) for  $p = 6$  and  $f(t) = \sqrt{t}$ .

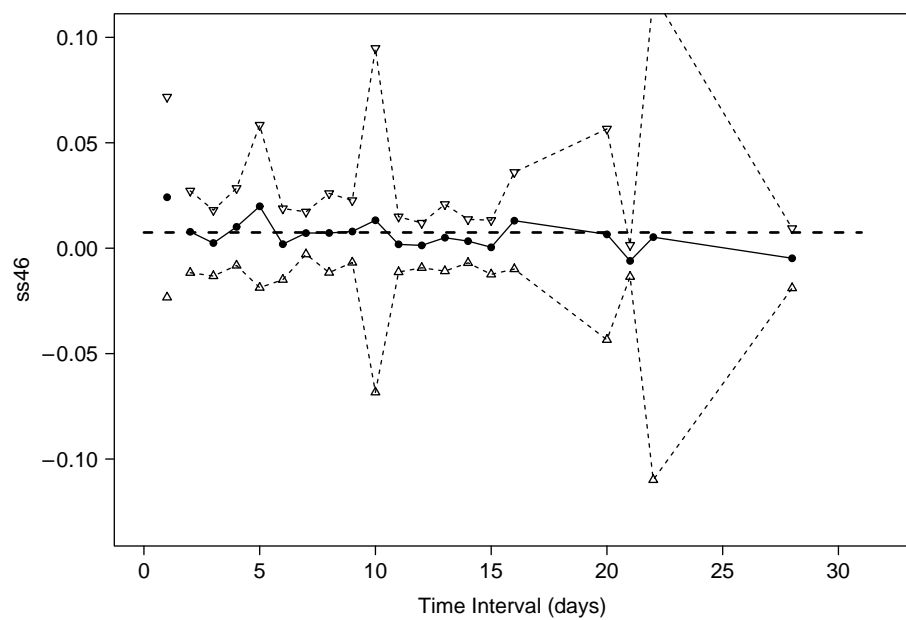

Figure S2.208. MLE of  $ss_{46}$  by Time Interval Compared to Overall Mean (0.0075) for  $p = 6$  and  $f(t) = \sqrt{t}$ .

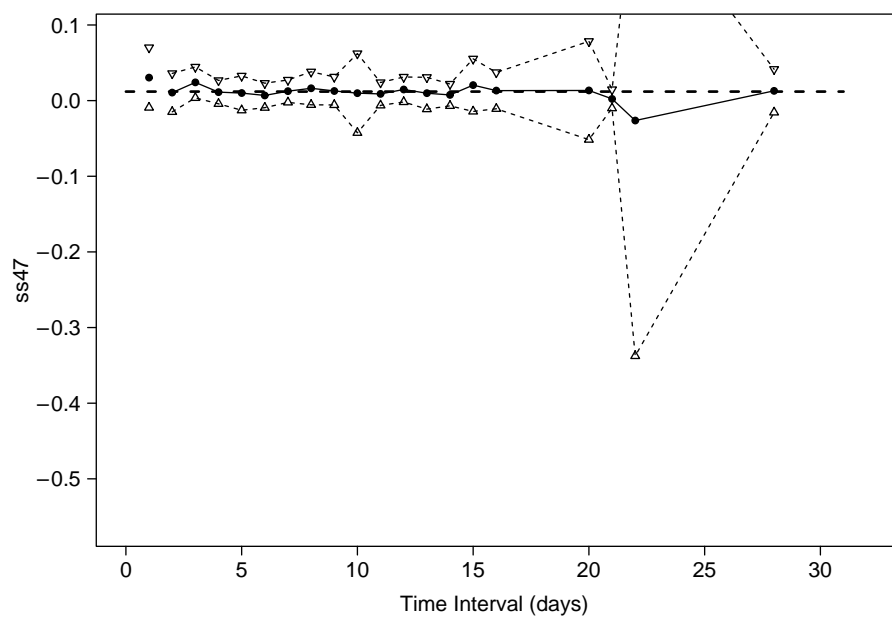

Figure S2.209. MLE of  $ss_{47}$  by Time Interval Compared to Overall Mean (0.0119) for  $p = 6$  and  $f(t) = \sqrt{t}$ .

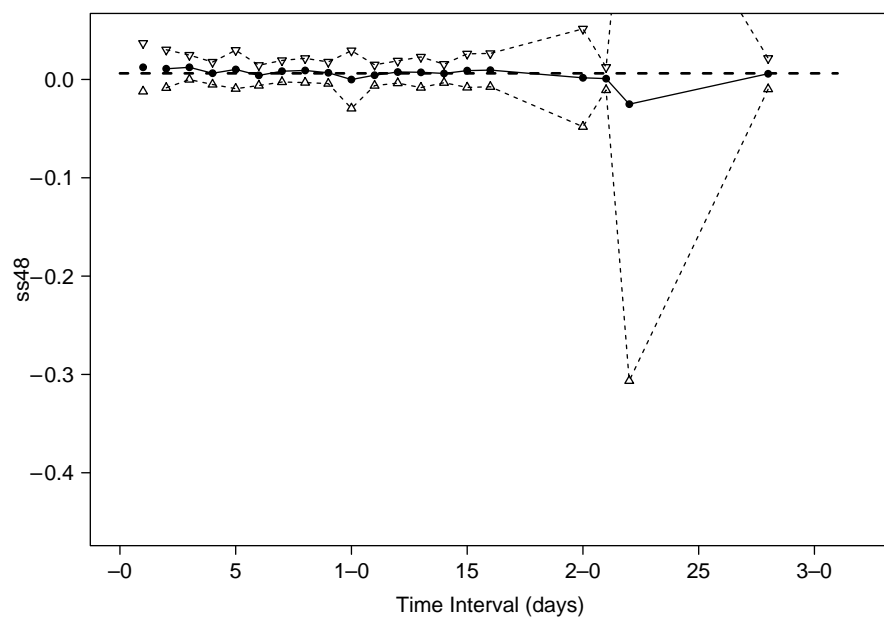

Figure S2.210. MLE of  $ss_{48}$  by Time Interval Compared to Overall Mean (0.0062) for  $p = 6$  and  $f(t) = \sqrt{t}$ .

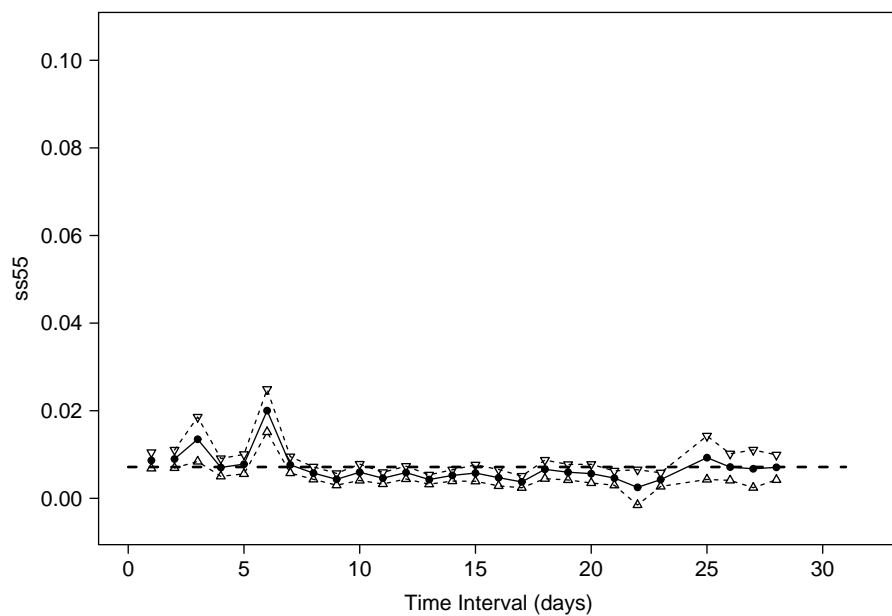

Figure S2.211. MLE of  $ss_{55}$  by Time Interval Compared to Overall Mean (0.0072) for  $p = 6$  and  $f(t) = \sqrt{t}$ .

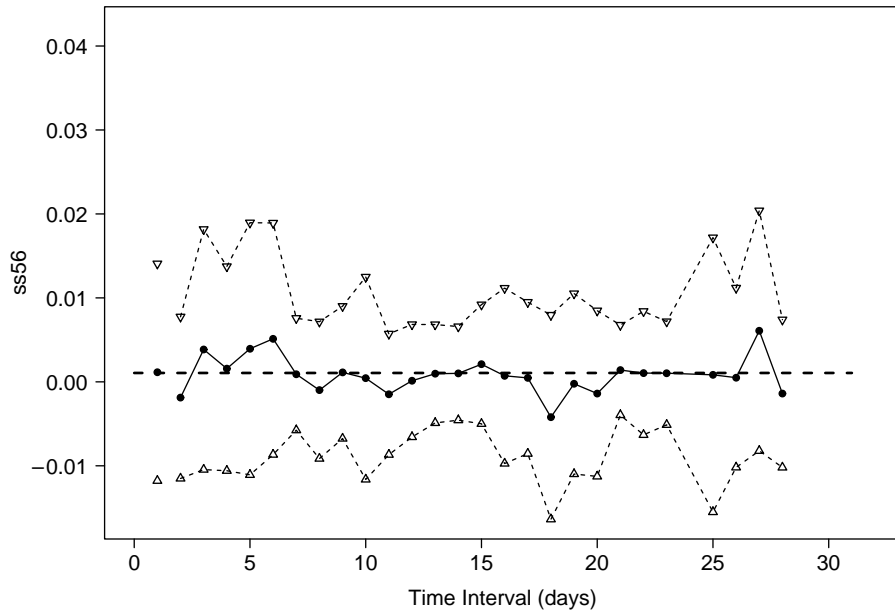

Figure S2.212. MLE of  $ss56$  by Time Interval Compared to Overall Mean (0.0011) for  $p = 6$  and  $f(t) = \sqrt{t}$ .

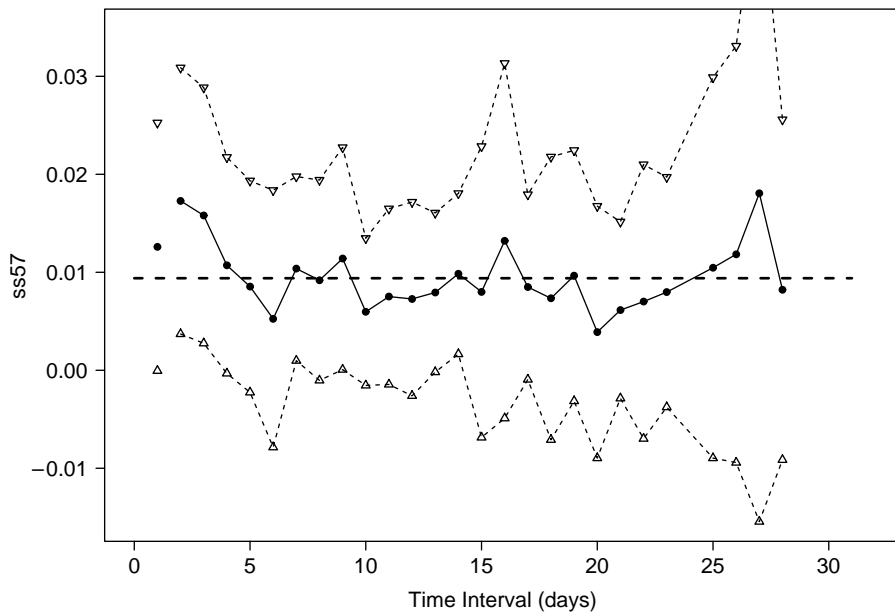

Figure S2.213. MLE of  $ss57$  by Time Interval Compared to Overall Mean (0.0094) for  $p = 6$  and  $f(t) = \sqrt{t}$ .



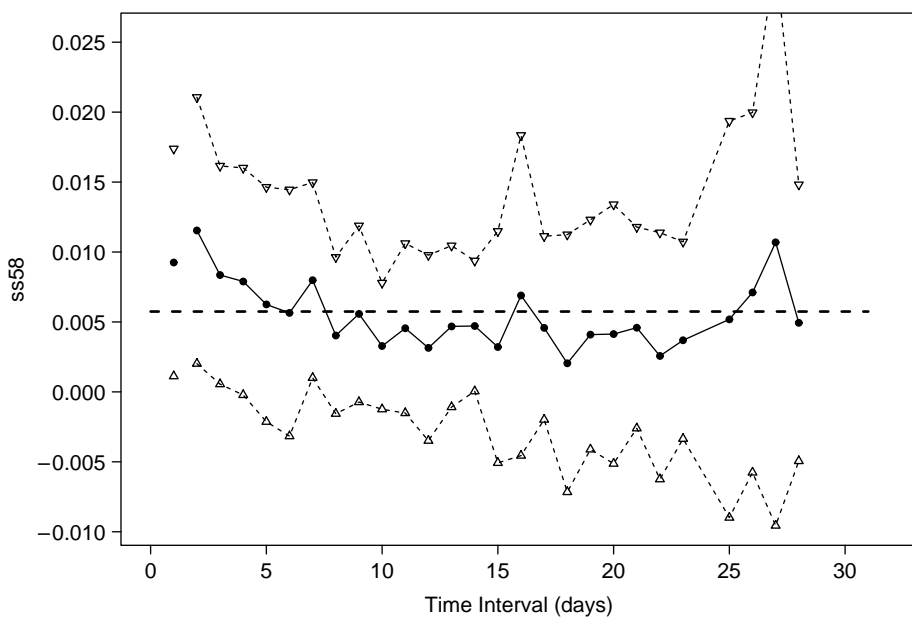

Figure S2.214. MLE of  $ss58$  by Time Interval Compared to Overall Mean (0.0057) for  $p = 6$  and  $f(t) = \sqrt{t}$ .

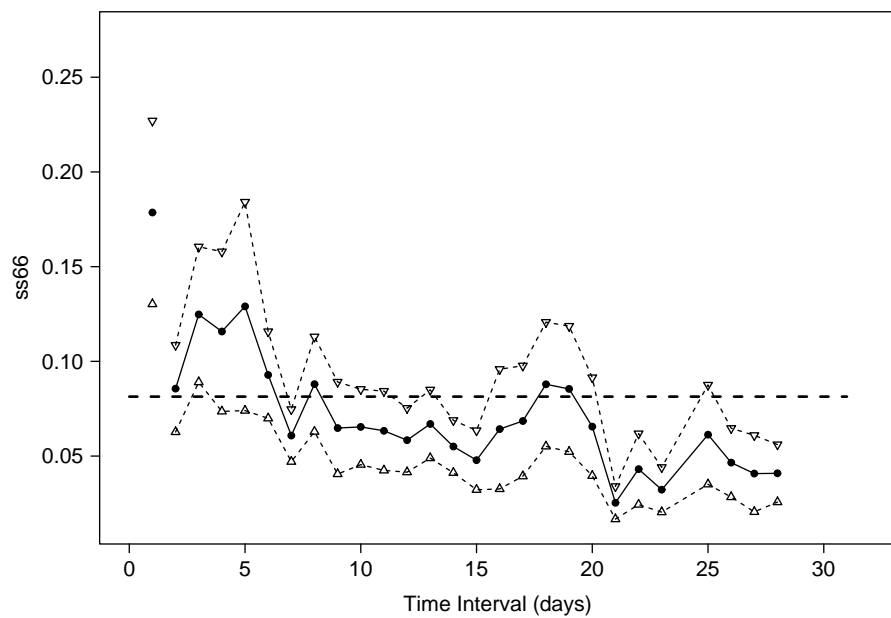

Figure S2.215. MLE of  $ss66$  by Time Interval Compared to Overall Mean (0.0814) for  $p = 6$  and  $f(t) = \sqrt{t}$ .

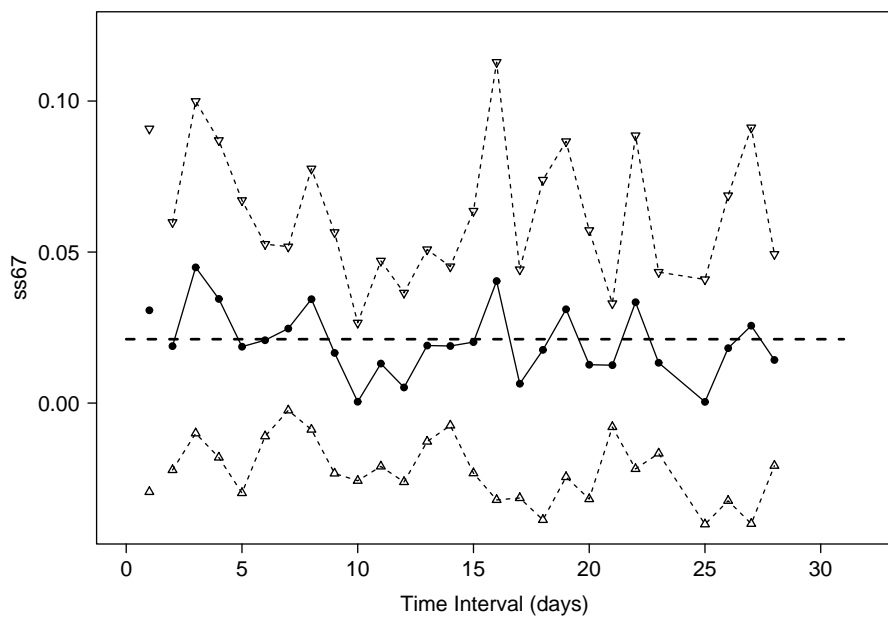

Figure S2.216. MLE of  $ss67$  by Time Interval Compared to Overall Mean (0.0212) for  $p = 6$  and  $f(t) = \sqrt{t}$ .

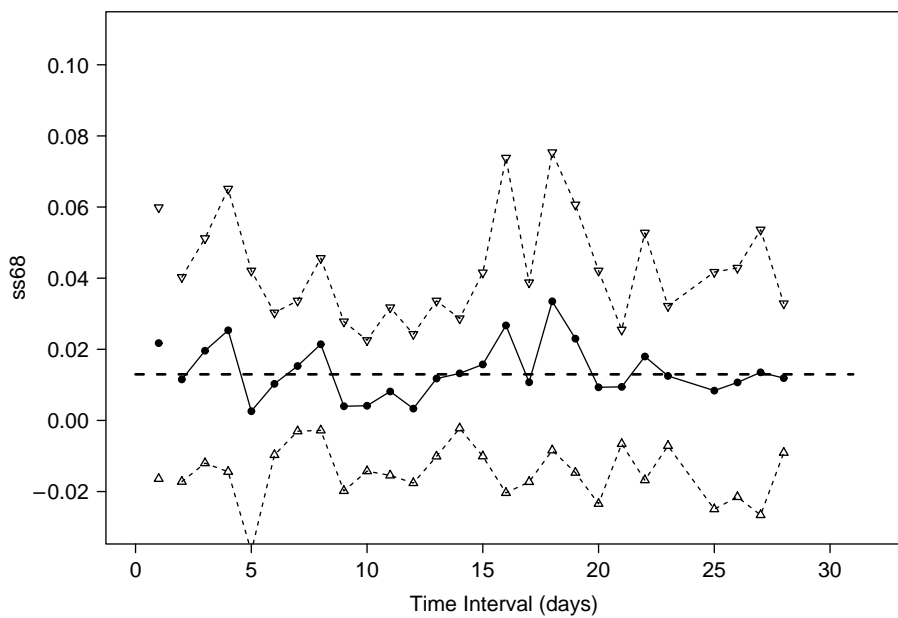

Figure S2.217. MLE of  $ss68$  by Time Interval Compared to Overall Mean (0.013) for  $p = 6$  and  $f(t) = \sqrt{t}$ .

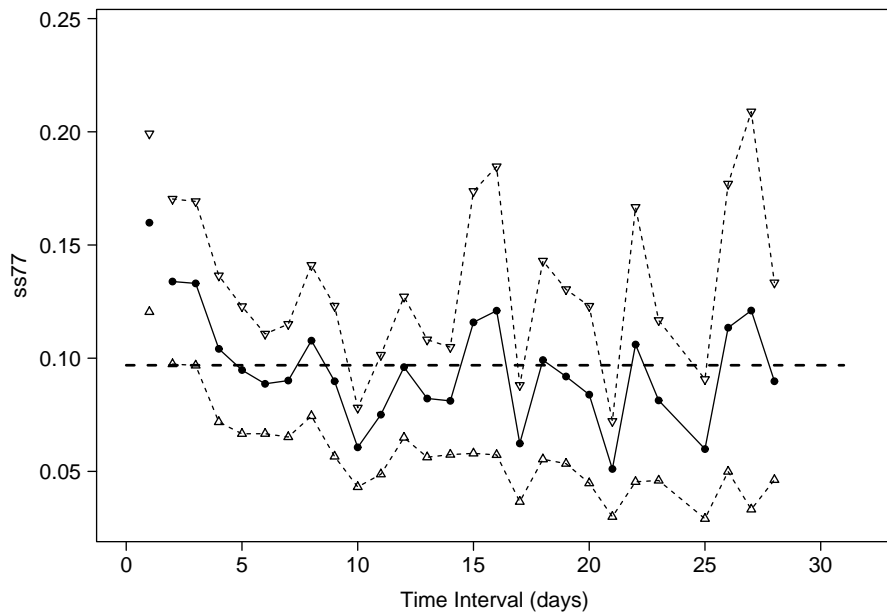

Figure S2.218. MLE of  $ss77$  by Time Interval Compared to Overall Mean (0.0969) for  $p = 6$  and  $f(t) = \sqrt{t}$ .

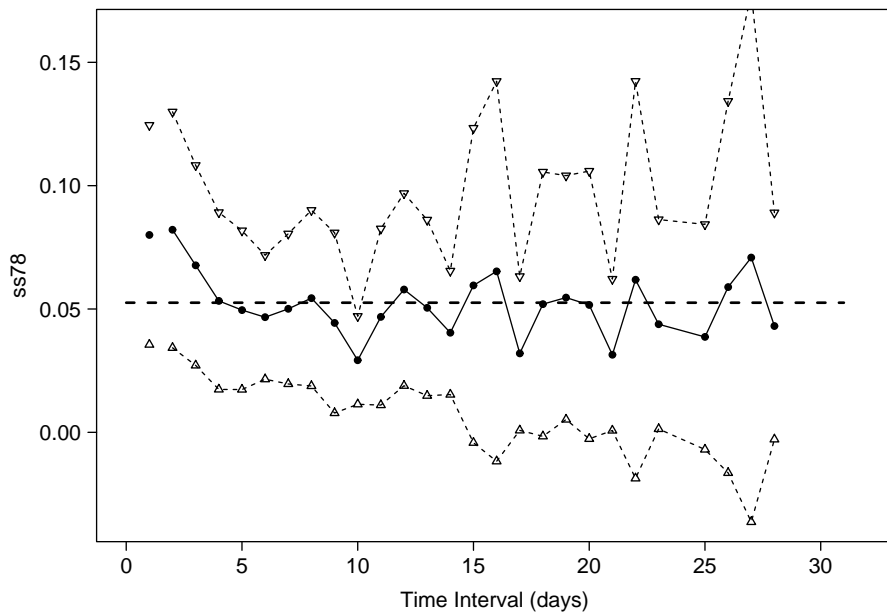

Figure S2.219. MLE of  $ss78$  by Time Interval Compared to Overall Mean (0.0526) for  $p = 6$  and  $f(t) = \sqrt{t}$ .

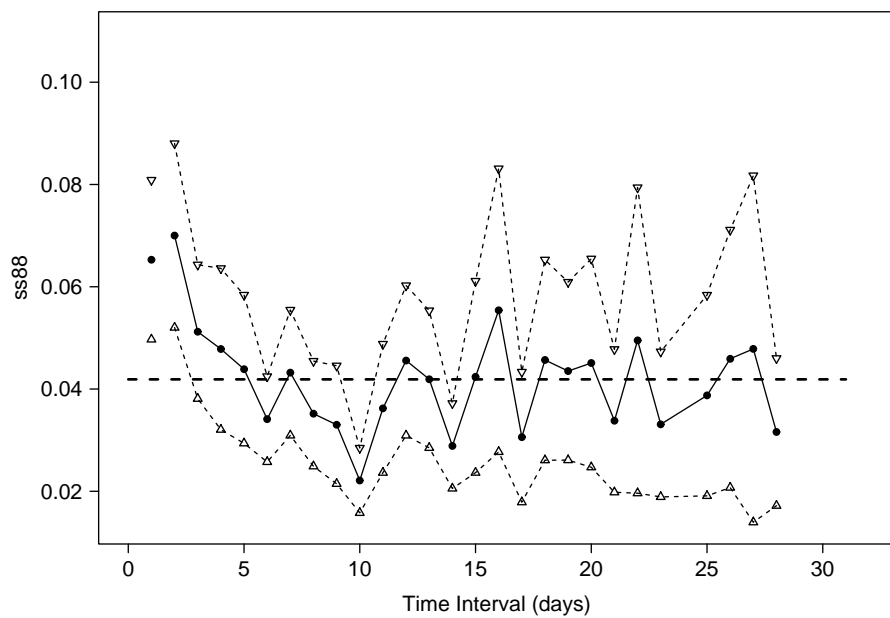

Figure S2.220. MLE of  $ss88$  by Time Interval Compared to Overall Mean (0.0419) for  $p = 6$  and  $f(t) = \sqrt{t}$ .

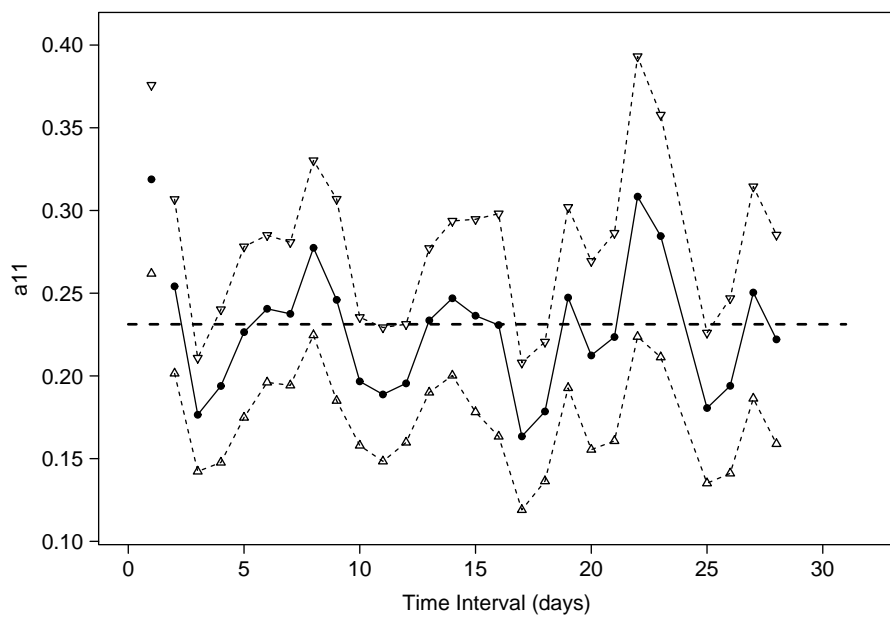

Figure S2.221. MLE of  $a11$  by Time Interval Compared to Overall Mean (0.2312) for  $p = 6$  and  $f(t) = \sqrt{t}$ .

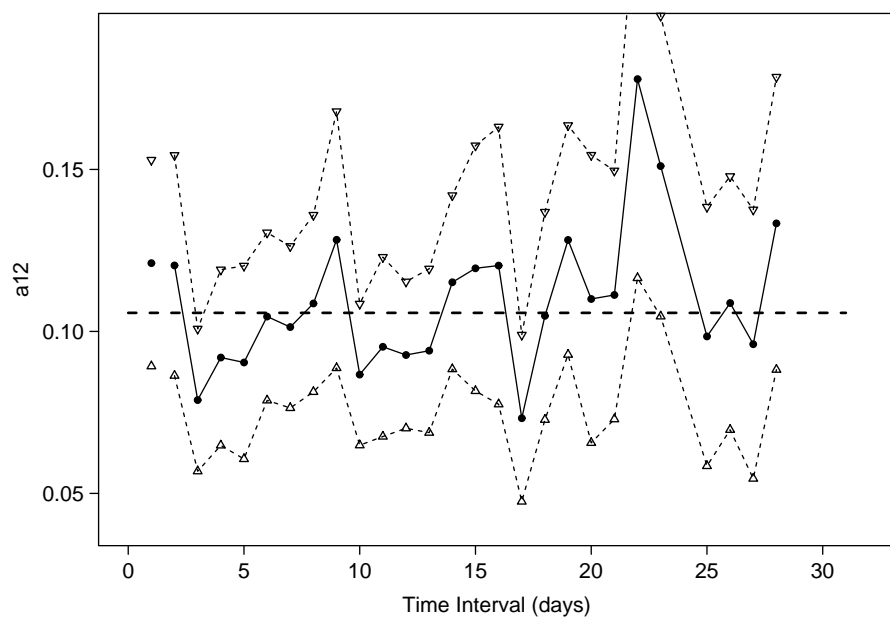

Figure S2.222. MLE of  $a_{12}$  by Time Interval Compared to Overall Mean (0.1057) for  $p = 6$  and  $f(t) = \sqrt{t}$ .

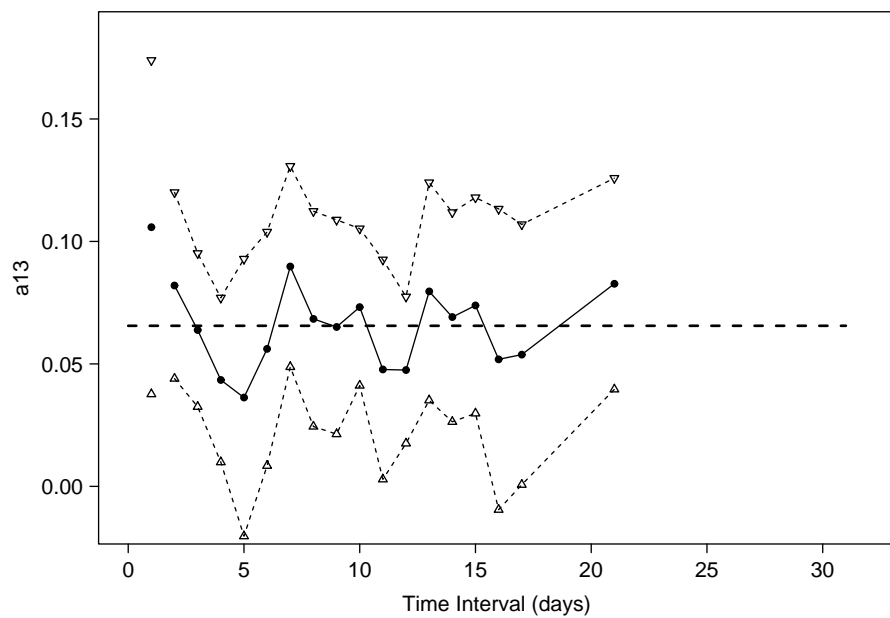

Figure S2.223. MLE of  $a_{13}$  by Time Interval Compared to Overall Mean (0.0656) for  $p = 6$  and  $f(t) = \sqrt{t}$ .

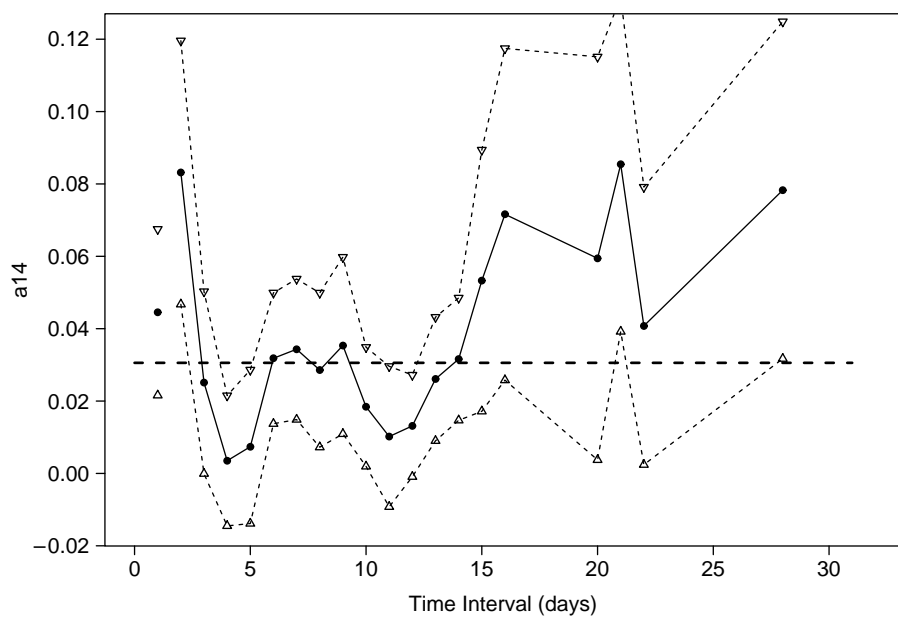

Figure S2.224. MLE of  $a_{14}$  by Time Interval Compared to Overall Mean (0.0306) for  $p = 6$  and  $f(t) = \sqrt{t}$ .

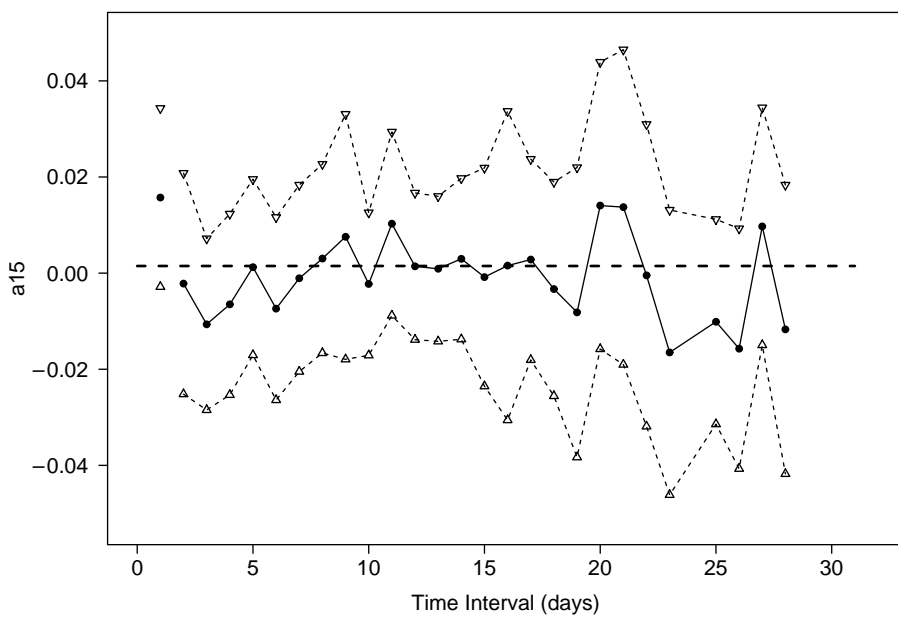

Figure S2.225. MLE of  $a_{15}$  by Time Interval Compared to Overall Mean (0.0015) for  $p = 6$  and  $f(t) = \sqrt{t}$ .

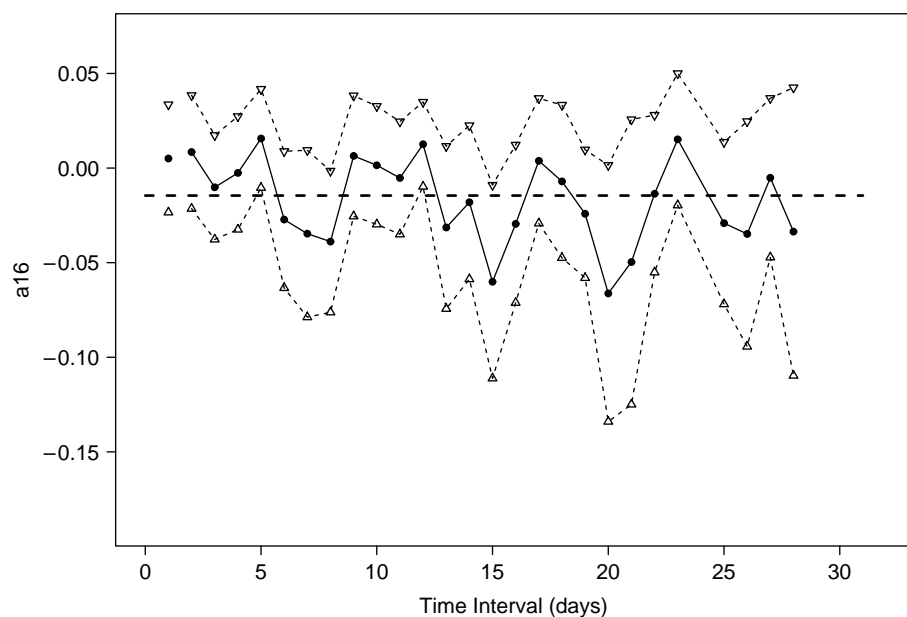

Figure S2.226. MLE of  $a_{16}$  by Time Interval Compared to Overall Mean ( $-0.0145$ ) for  $p = 6$  and  $f(t) = \sqrt{t}$ .

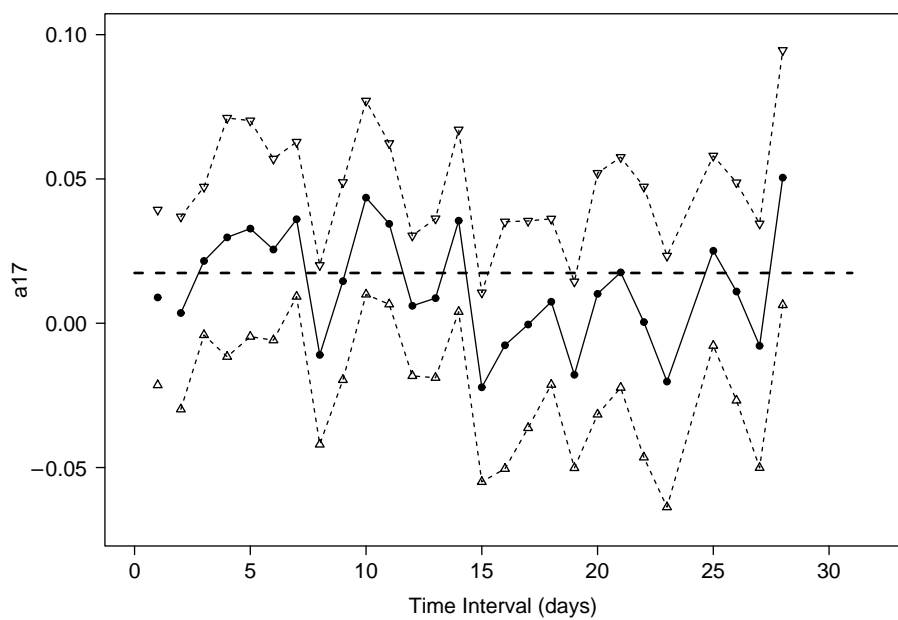

Figure S2.227. MLE of  $a_{17}$  by Time Interval Compared to Overall Mean ( $0.0174$ ) for  $p = 6$  and  $f(t) = \sqrt{t}$ .

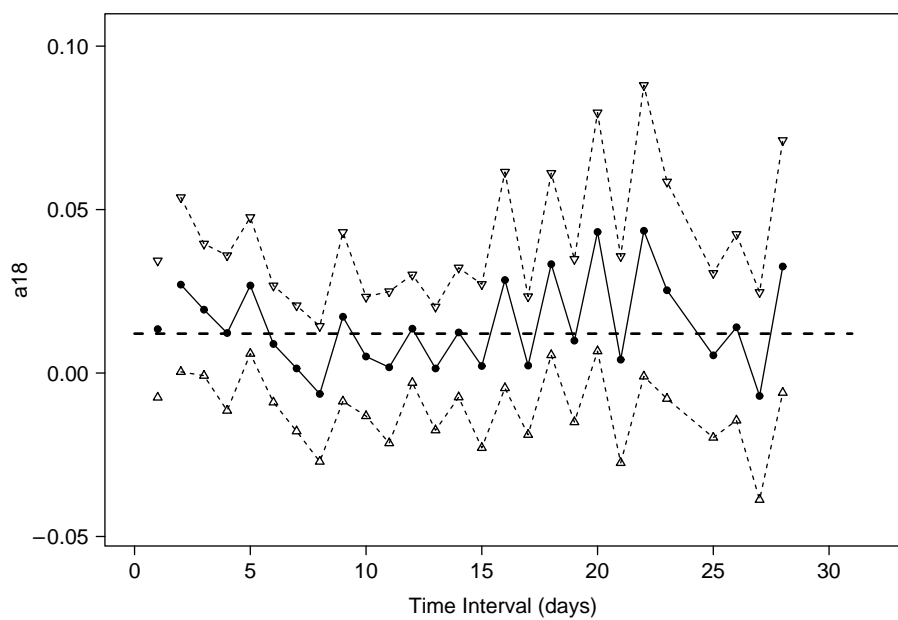

Figure S2.228. MLE of  $a_{18}$  by Time Interval Compared to Overall Mean (0.012) for  $p = 6$  and  $f(t) = \sqrt{t}$ .

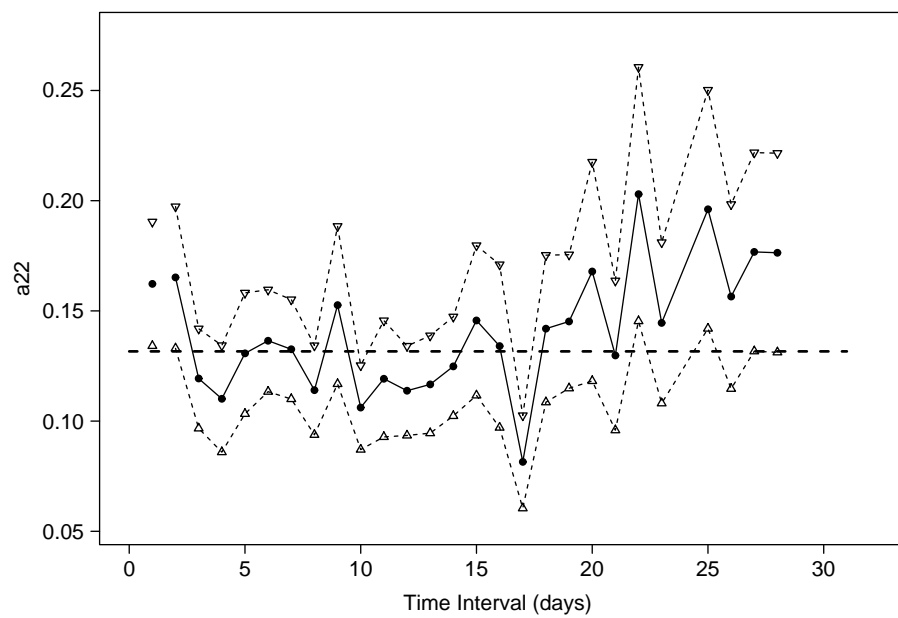

Figure S2.229. MLE of  $a_{22}$  by Time Interval Compared to Overall Mean (0.1316) for  $p = 6$  and  $f(t) = \sqrt{t}$ .



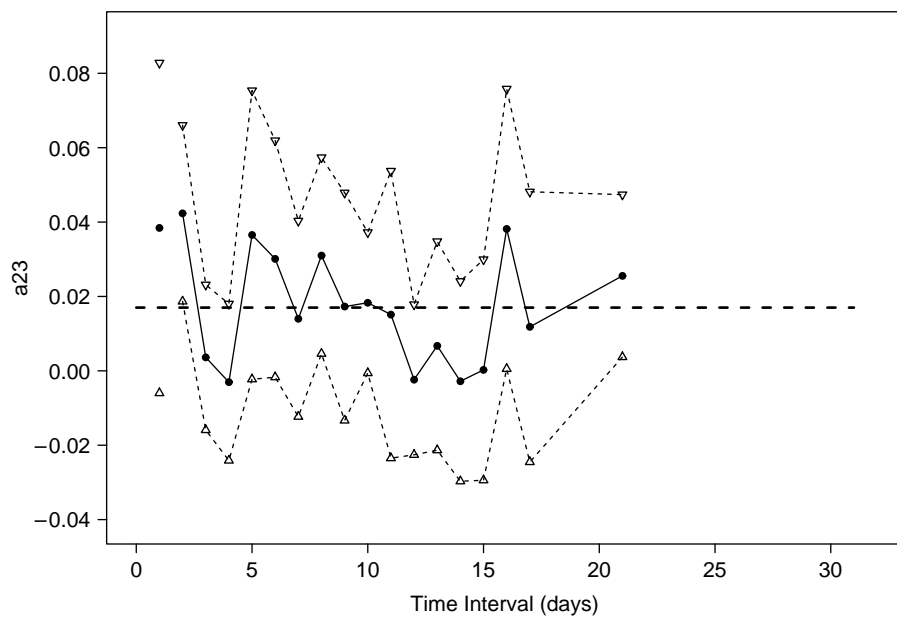

Figure S2.230. MLE of  $a_{23}$  by Time Interval Compared to Overall Mean (0.017) for  $p = 6$  and  $f(t) = \sqrt{t}$ .

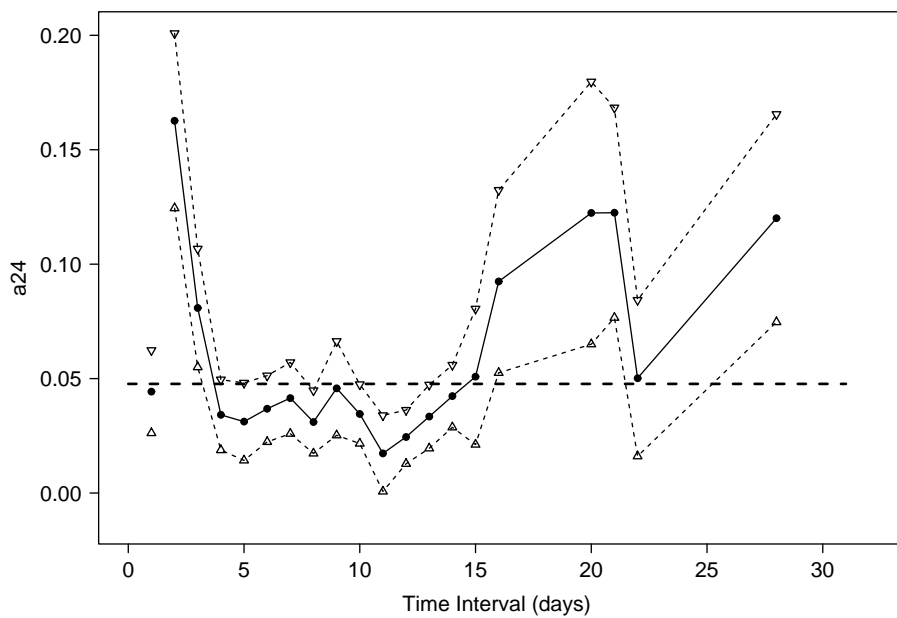

Figure S2.231. MLE of  $a_{24}$  by Time Interval Compared to Overall Mean (0.0477) for  $p = 6$  and  $f(t) = \sqrt{t}$ .

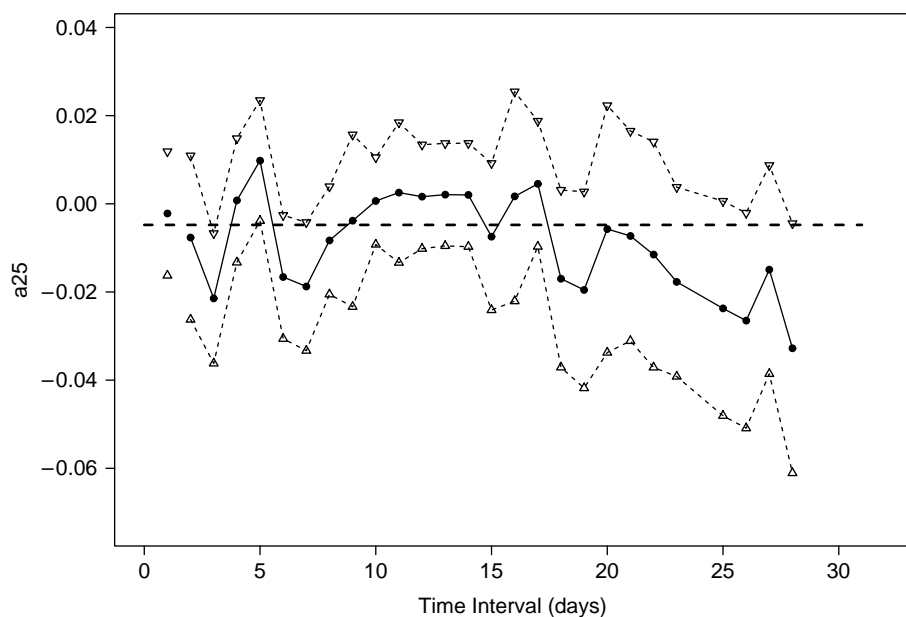

Figure S2.232. MLE of  $a_{25}$  by Time Interval Compared to Overall Mean ( $-0.0048$ ) for  $p = 6$  and  $f(t) = \sqrt{t}$ .

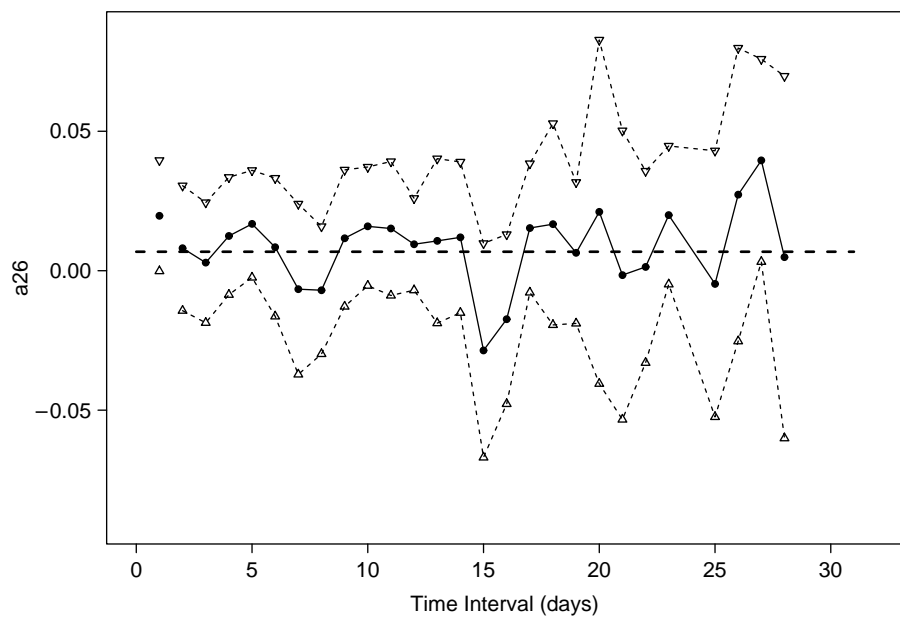

Figure S2.233. MLE of  $a_{26}$  by Time Interval Compared to Overall Mean ( $0.0068$ ) for  $p = 6$  and  $f(t) = \sqrt{t}$ .

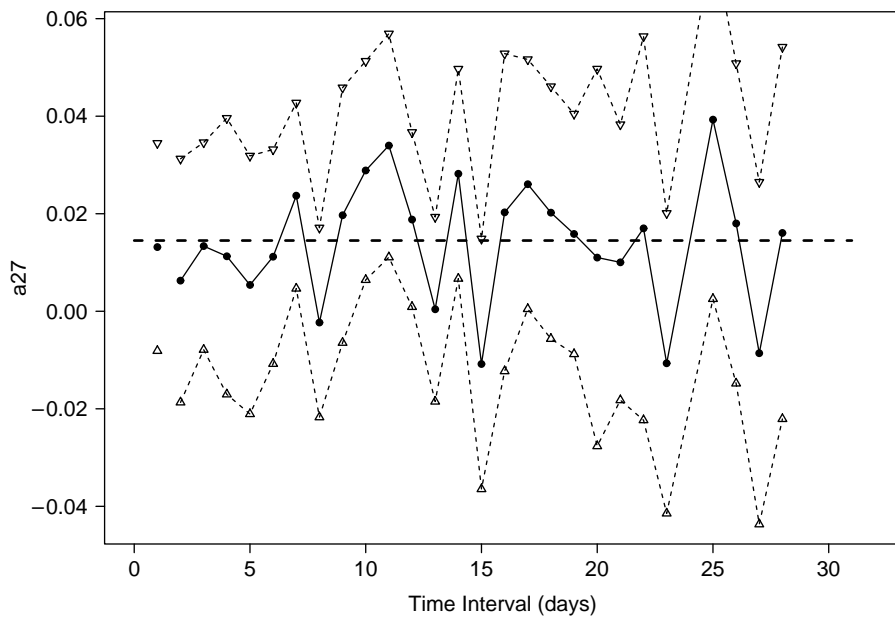

Figure S2.234. MLE of  $a_{27}$  by Time Interval Compared to Overall Mean (0.0145) for  $p = 6$  and  $f(t) = \sqrt{t}$ .

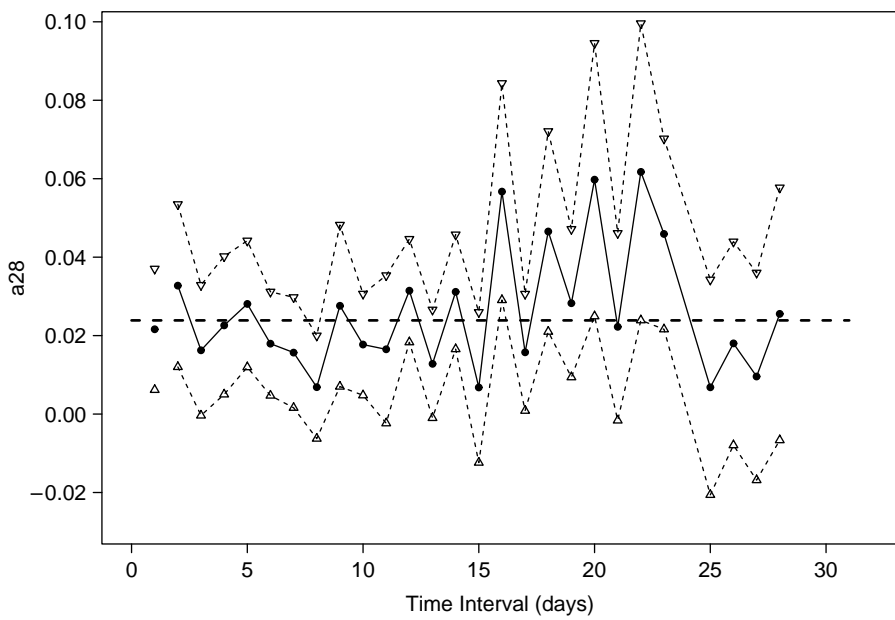

Figure S2.235. MLE of  $a_{28}$  by Time Interval Compared to Overall Mean (0.0239) for  $p = 6$  and  $f(t) = \sqrt{t}$ .

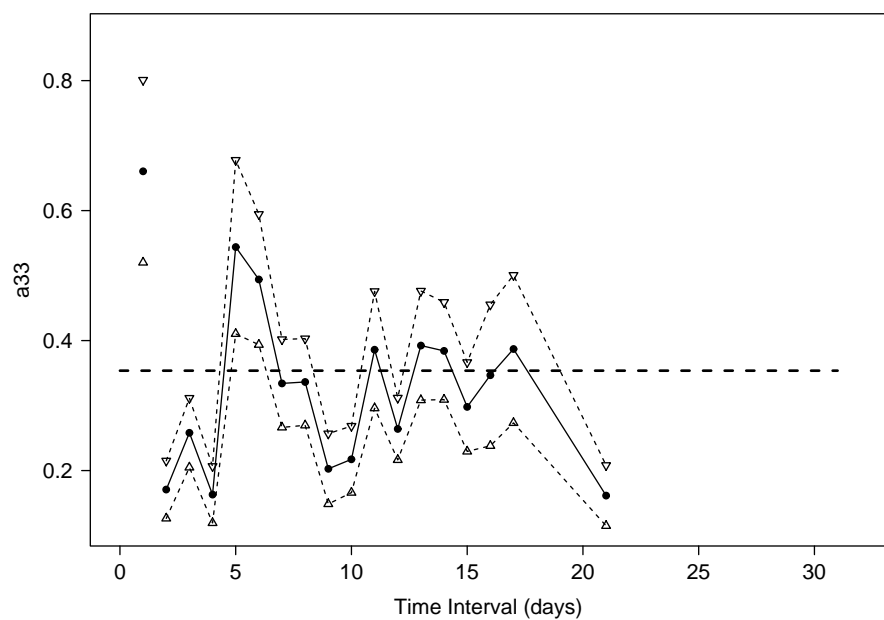

Figure S2.236. MLE of  $a_{33}$  by Time Interval Compared to Overall Mean (0.3537) for  $p = 6$  and  $f(t) = \sqrt{t}$ .

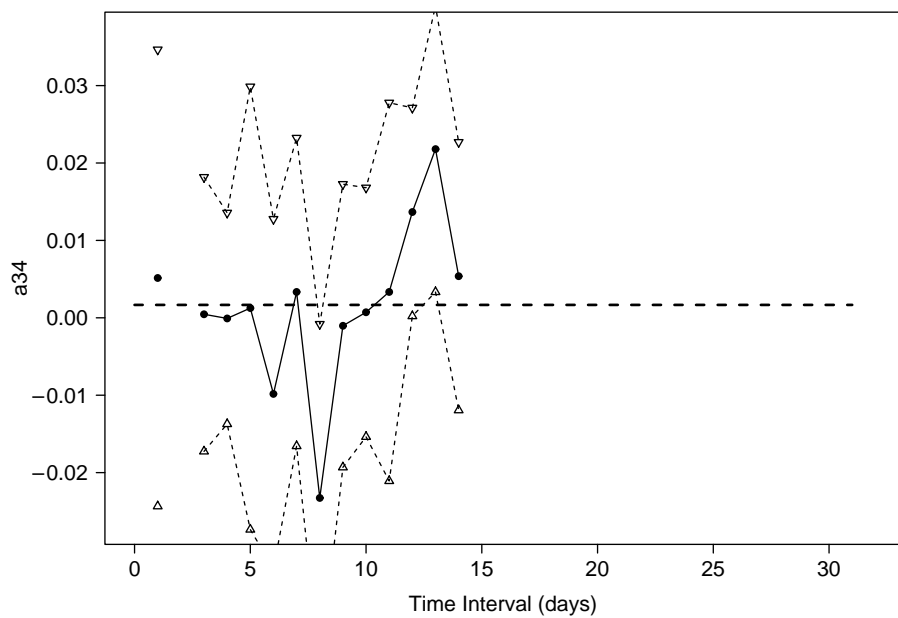

Figure S2.237. MLE of  $a_{34}$  by Time Interval Compared to Overall Mean (0.0017) for  $p = 6$  and  $f(t) = \sqrt{t}$ .

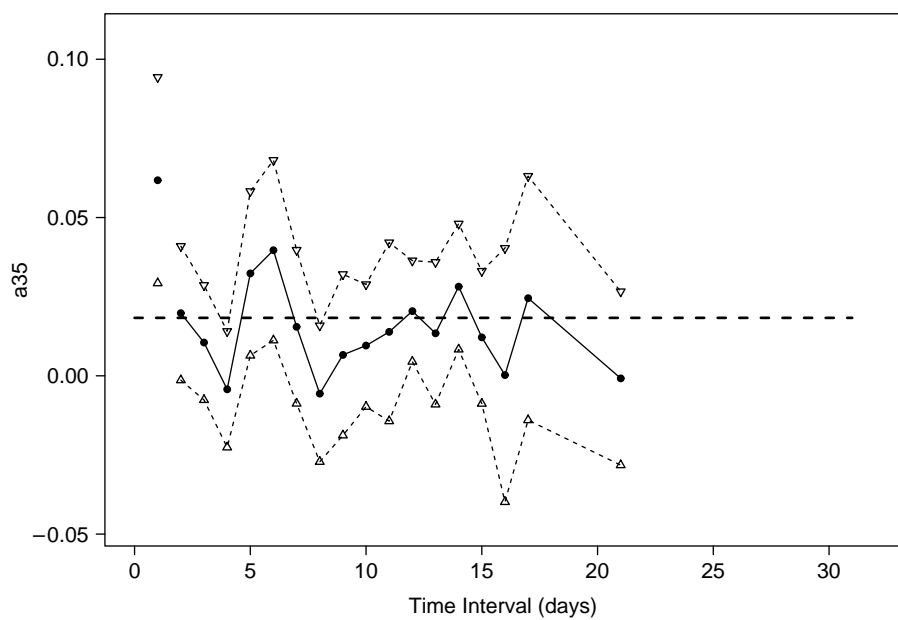

Figure S2.238. MLE of  $a_{35}$  by Time Interval Compared to Overall Mean (0.0183) for  $p = 6$  and  $f(t) = \sqrt{t}$ .

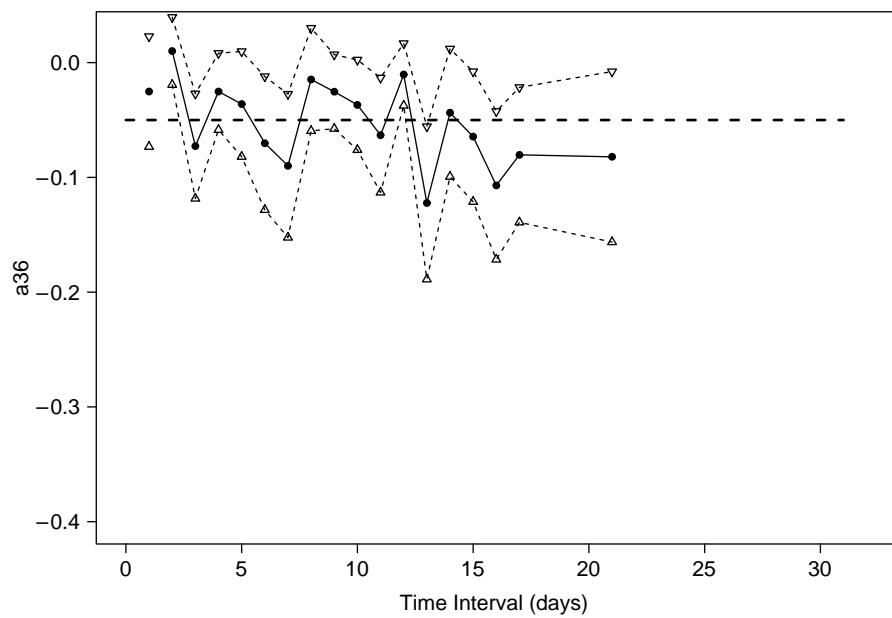

Figure S2.239. MLE of  $a_{36}$  by Time Interval Compared to Overall Mean (-0.05) for  $p = 6$  and  $f(t) = \sqrt{t}$ .

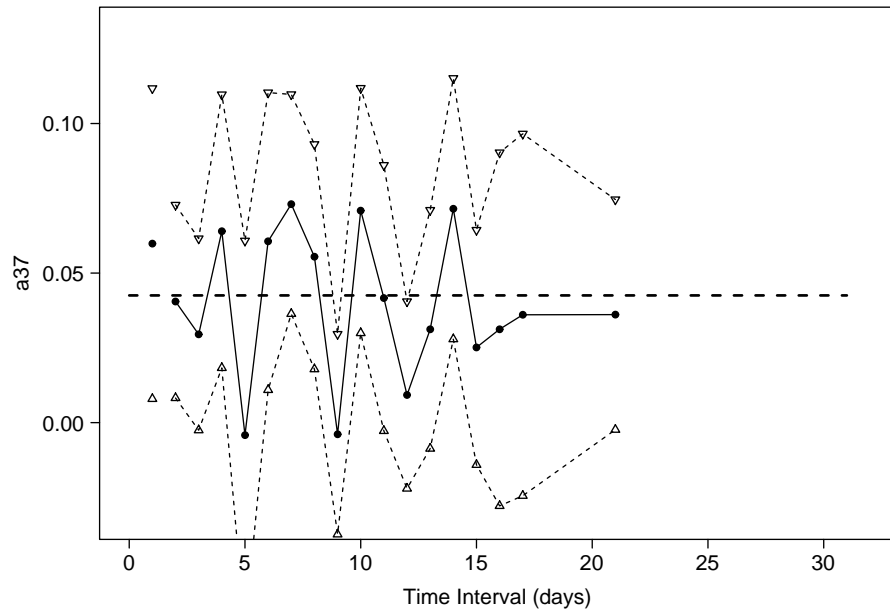

Figure S2.240. MLE of  $a_{37}$  by Time Interval Compared to Overall Mean (0.0425) for  $p = 6$  and  $f(t) = \sqrt{t}$ .

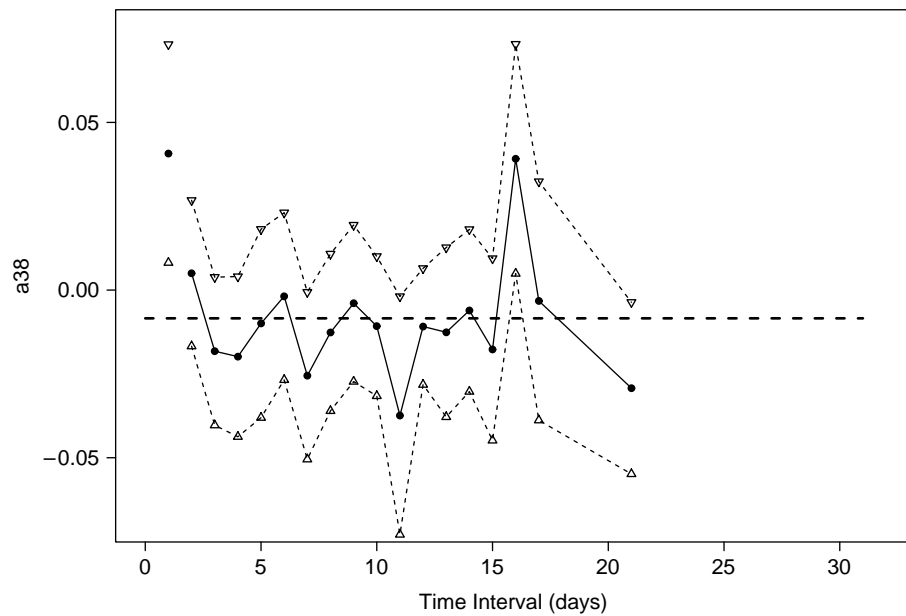

Figure S2.241. MLE of  $a_{38}$  by Time Interval Compared to Overall Mean (-0.0084) for  $p = 6$  and  $f(t) = \sqrt{t}$ .

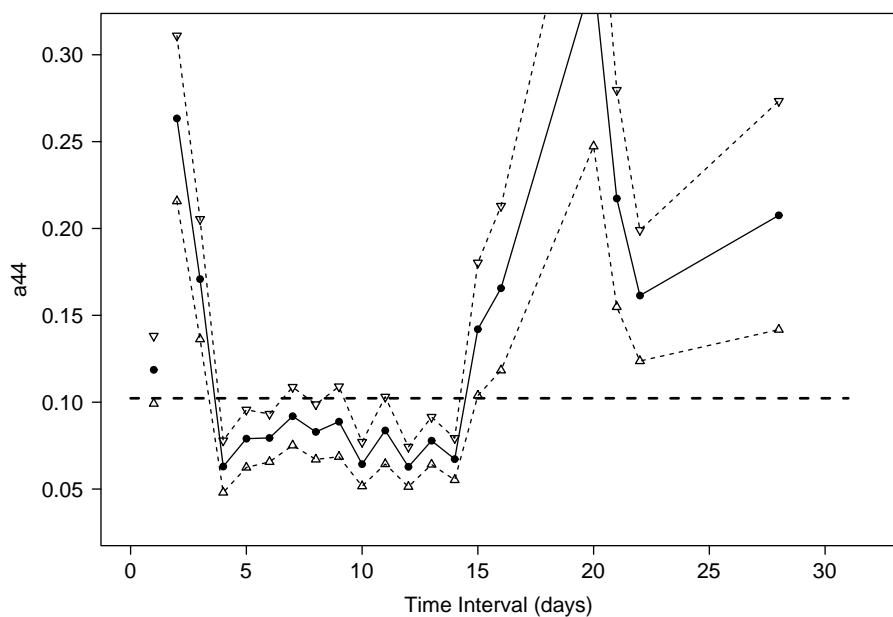

Figure S2.242. MLE of  $a_{44}$  by Time Interval Compared to Overall Mean (0.1023) for  $p = 6$  and  $f(t) = \sqrt{t}$ .

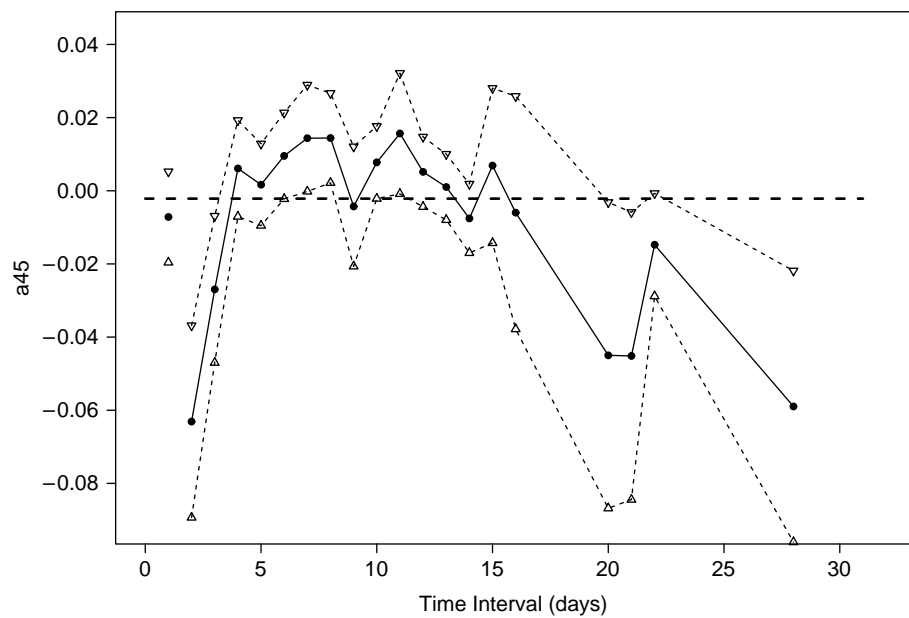

Figure S2.243. MLE of  $a_{45}$  by Time Interval Compared to Overall Mean ( $-0.0022$ ) for  $p = 6$  and  $f(t) = \sqrt{t}$ .

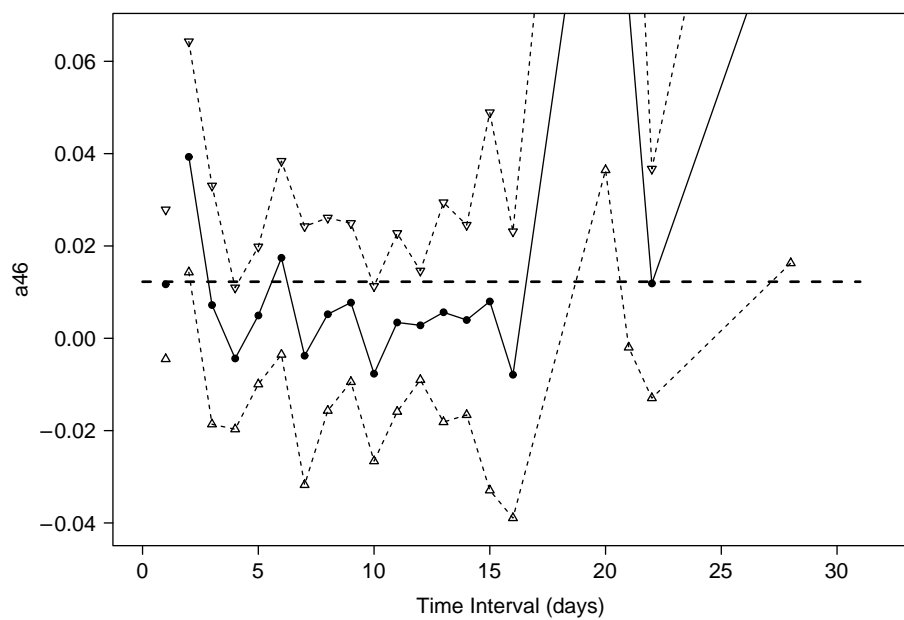

Figure S2.244. MLE of  $a_{46}$  by Time Interval Compared to Overall Mean (0.0123) for  $p = 6$  and  $f(t) = \sqrt{t}$ .

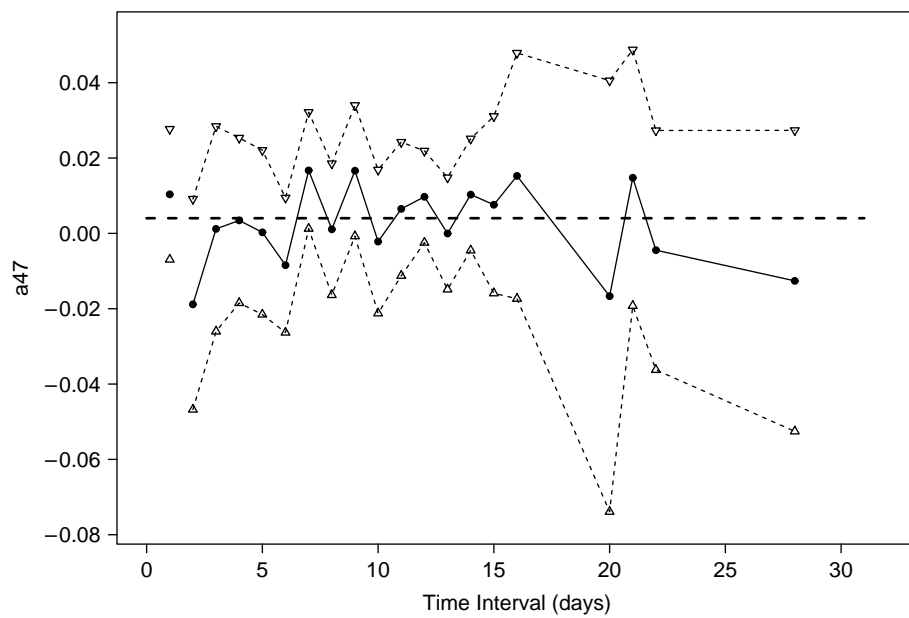

Figure S2.245. MLE of  $a_{47}$  by Time Interval Compared to Overall Mean (0.004) for  $p = 6$  and  $f(t) = \sqrt{t}$ .



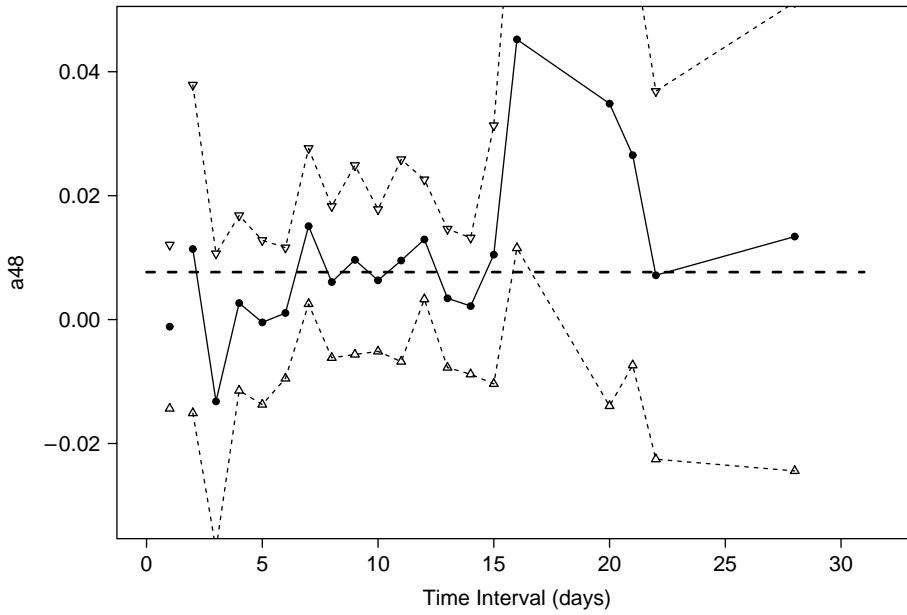

Figure S2.246. MLE of  $a_{48}$  by Time Interval Compared to Overall Mean (0.0077) for  $p = 6$  and  $f(t) = \sqrt{t}$ .

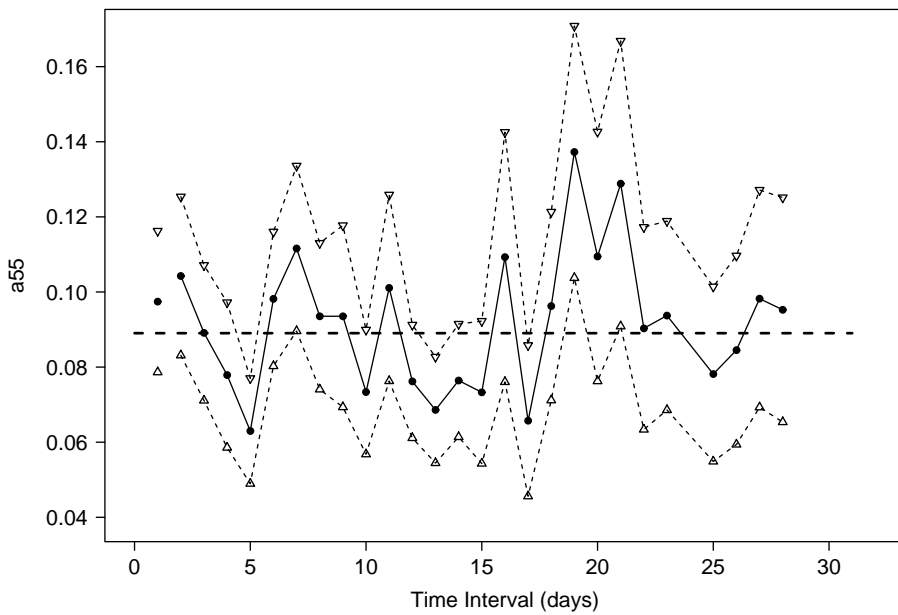

Figure S2.247. MLE of  $a_{55}$  by Time Interval Compared to Overall Mean (0.089) for  $p = 6$  and  $f(t) = \sqrt{t}$ .

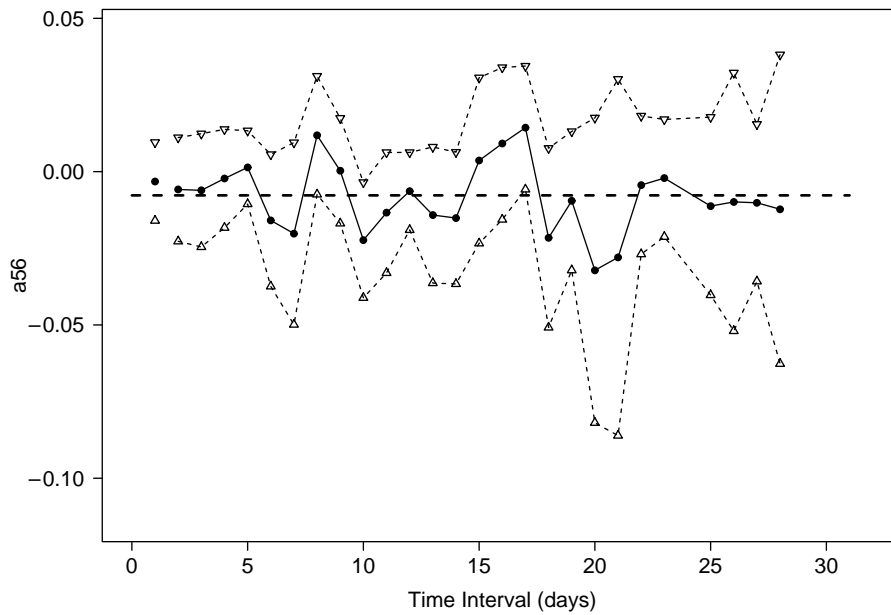

Figure S2.248. MLE of  $a_{56}$  by Time Interval Compared to Overall Mean ( $-0.0077$ ) for  $p = 6$  and  $f(t) = \sqrt{t}$ .

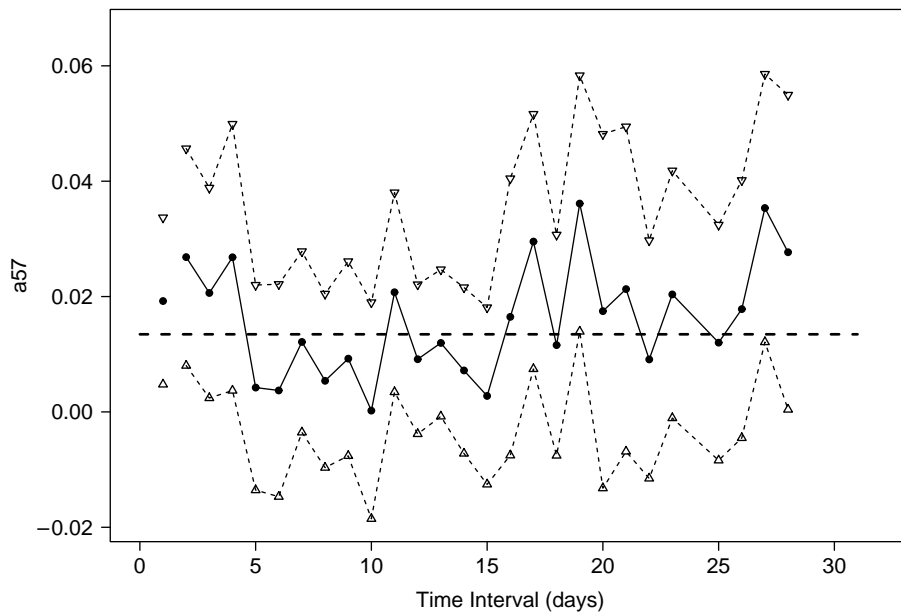

Figure S2.249. MLE of  $a_{57}$  by Time Interval Compared to Overall Mean ( $0.0135$ ) for  $p = 6$  and  $f(t) = \sqrt{t}$ .

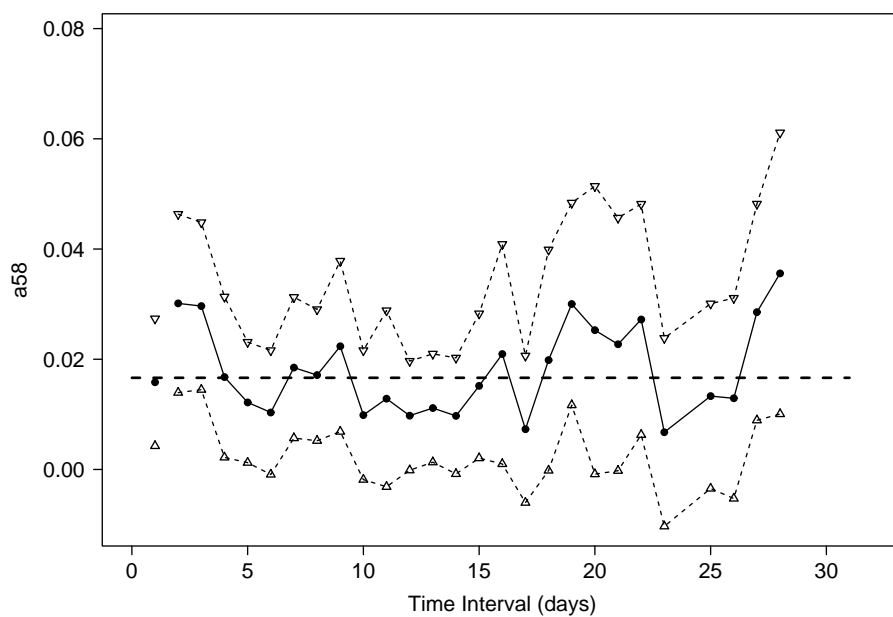

Figure S2.250. MLE of  $a_{58}$  by Time Interval Compared to Overall Mean (0.0166) for  $p = 6$  and  $f(t) = \sqrt{t}$ .

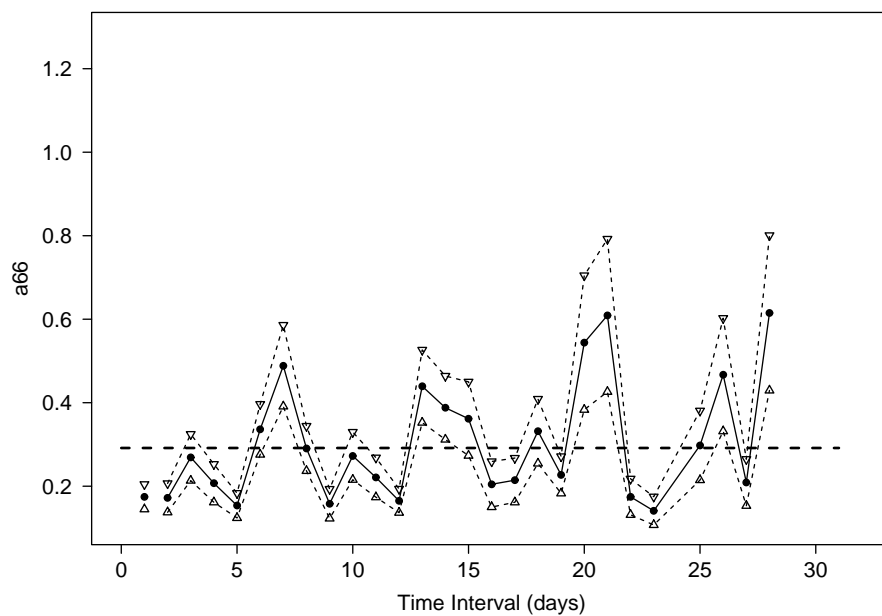

Figure S2.251. MLE of  $a_{66}$  by Time Interval Compared to Overall Mean (0.2915) for  $p = 6$  and  $f(t) = \sqrt{t}$ .

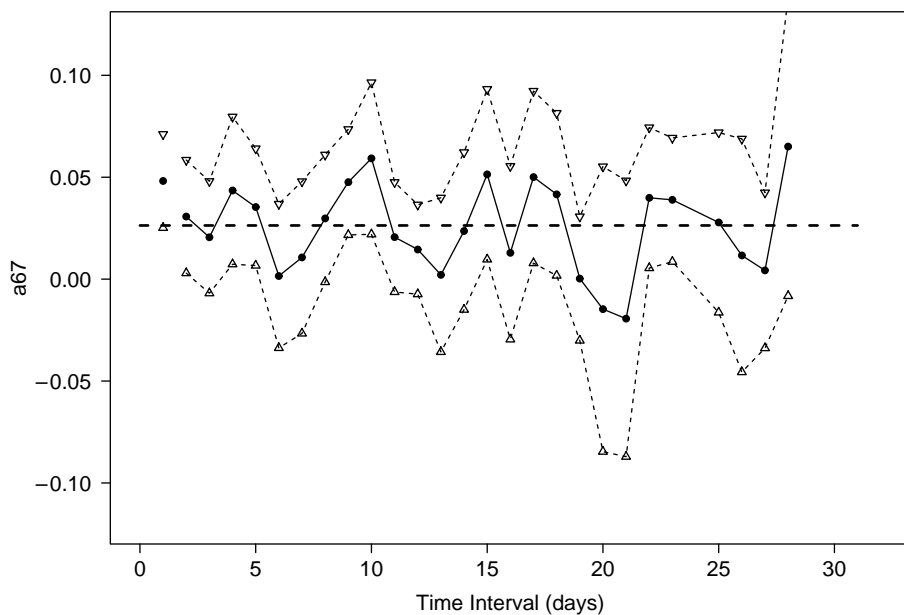

Figure S2.252. MLE of  $a_{67}$  by Time Interval Compared to Overall Mean (0.0263) for  $p = 6$  and  $f(t) = \sqrt{t}$ .

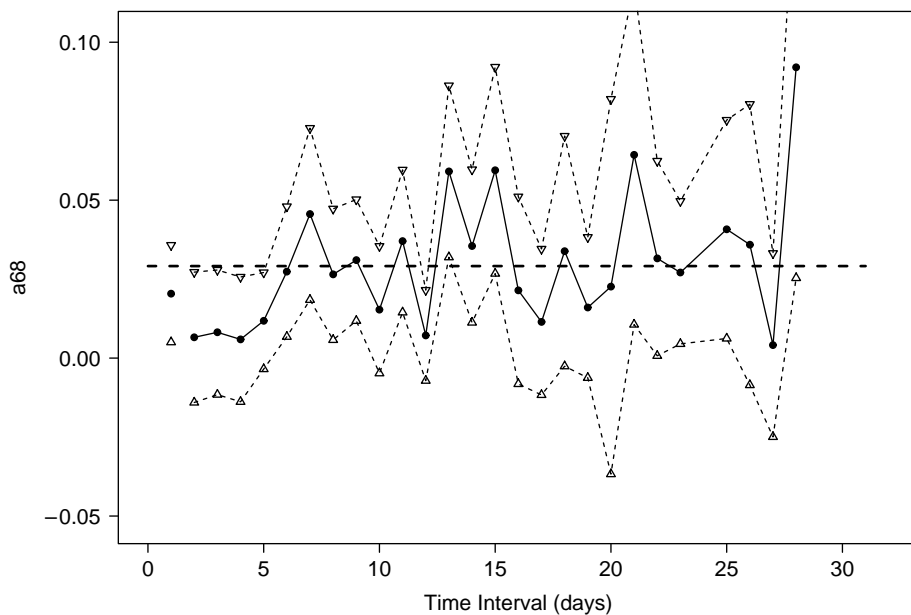

Figure S2.253. MLE of  $a_{68}$  by Time Interval Compared to Overall Mean (0.0291) for  $p = 6$  and  $f(t) = \sqrt{t}$ .

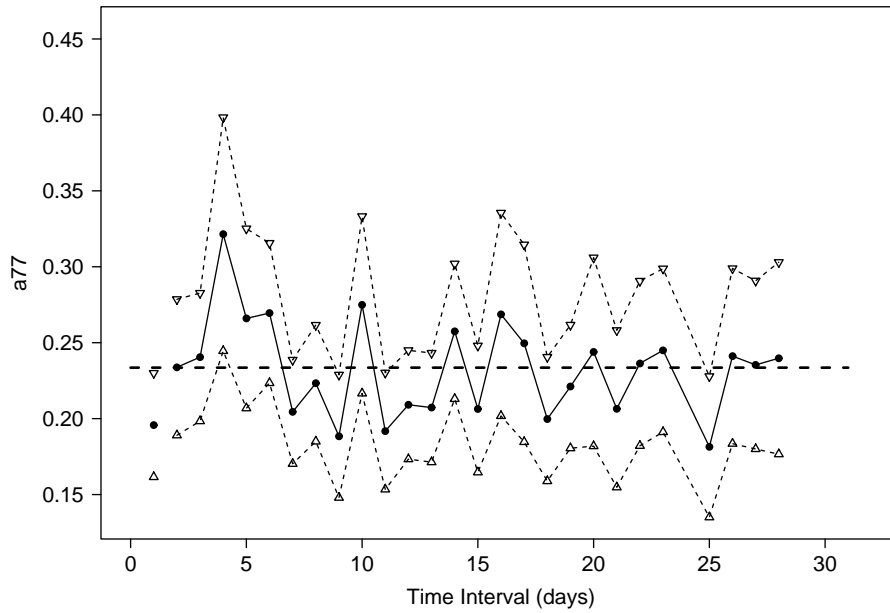

Figure S2.254. MLE of  $a_{77}$  by Time Interval Compared to Overall Mean (0.2336) for  $p = 6$  and  $f(t) = \sqrt{t}$ .

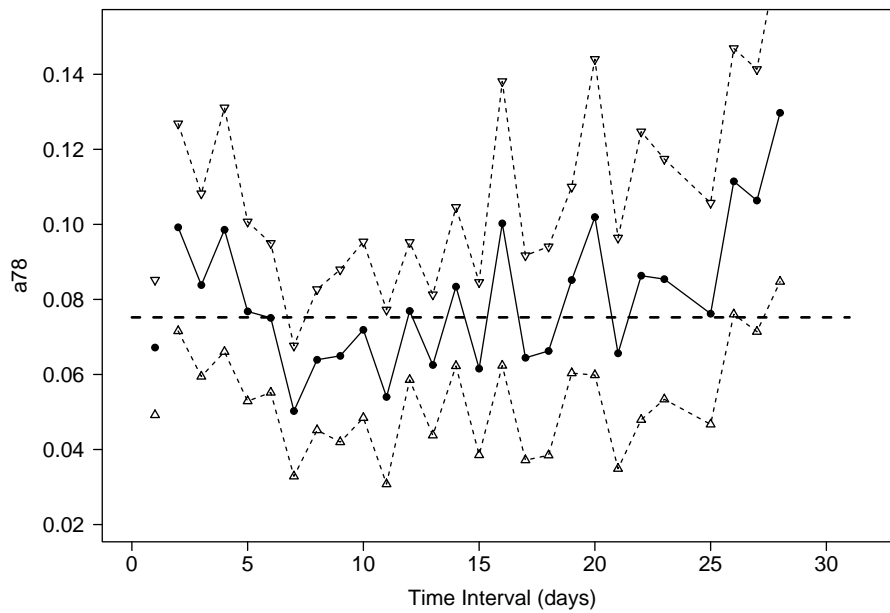

Figure S2.255. MLE of  $a_{78}$  by Time Interval Compared to Overall Mean (0.0752) for  $p = 6$  and  $f(t) = \sqrt{t}$ .

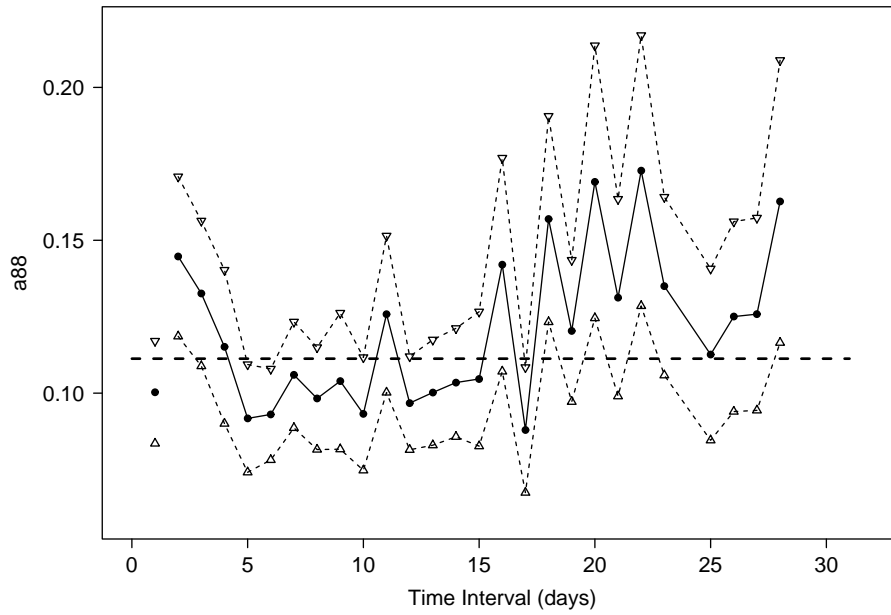

Figure S2.256. MLE of  $a_{88}$  by Time Interval Compared to Overall Mean (0.1113) for  $p = 6$  and  $f(t) = \sqrt{t}$ .

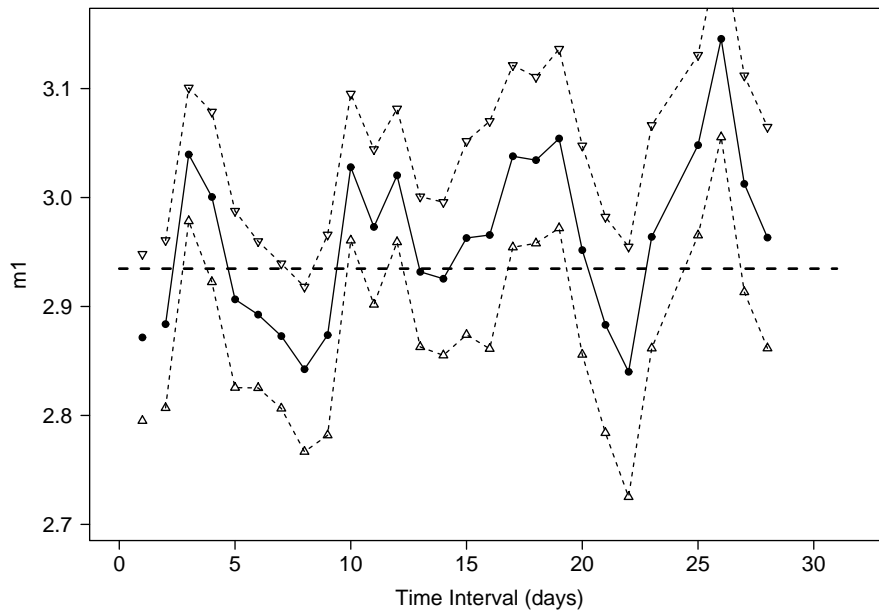

Figure S2.257. MLE of  $m_1$  by Time Interval Compared to Overall Mean (2.9347) for  $p = 6$  and  $f(t) = \sqrt{t}$ .

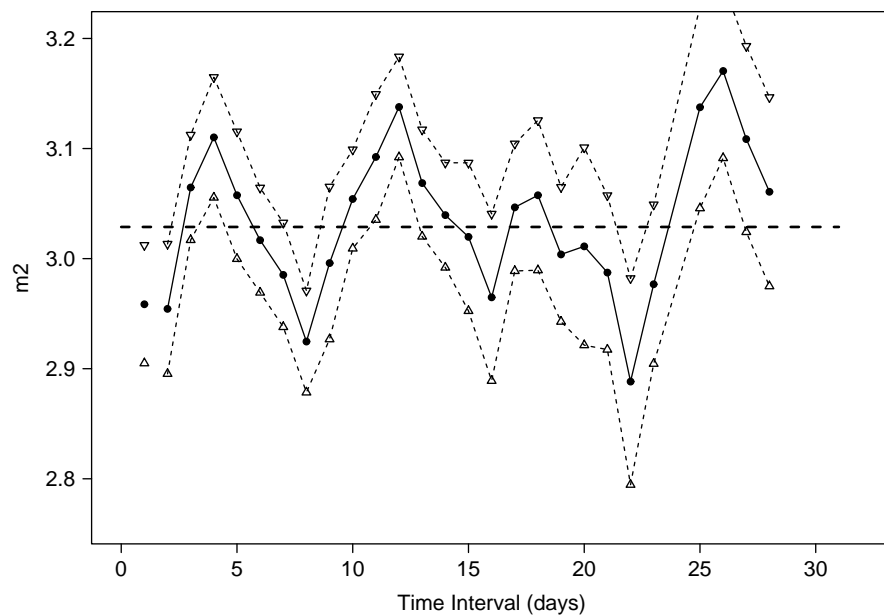

Figure S2.258. MLE of  $m_2$  by Time Interval Compared to Overall Mean (3.0288) for  $p = 6$  and  $f(t) = \sqrt{t}$ .

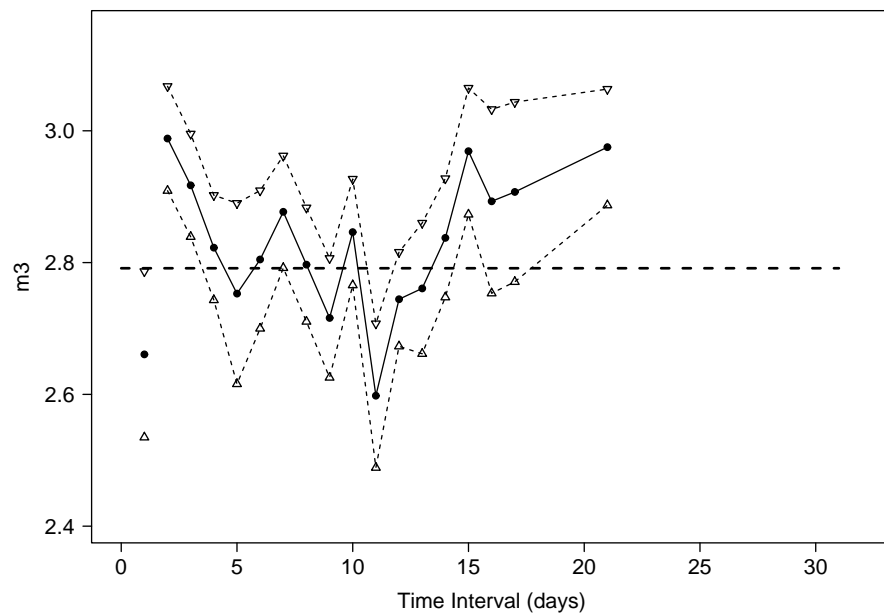

Figure S2.259. MLE of  $m_3$  by Time Interval Compared to Overall Mean (2.7914) for  $p = 6$  and  $f(t) = \sqrt{t}$ .

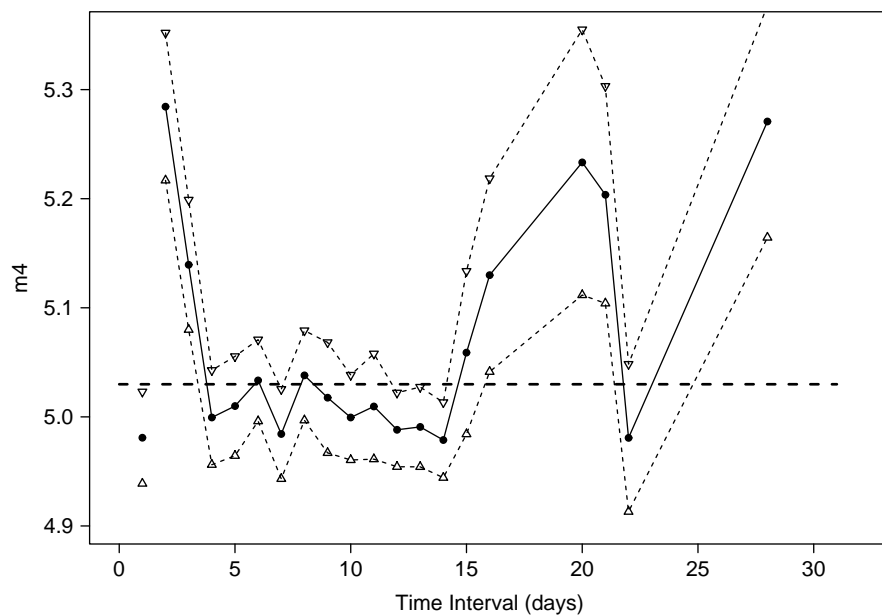

Figure S2.260. MLE of  $m_4$  by Time Interval Compared to Overall Mean (5.0299) for  $p = 6$  and  $f(t) = \sqrt{t}$ .

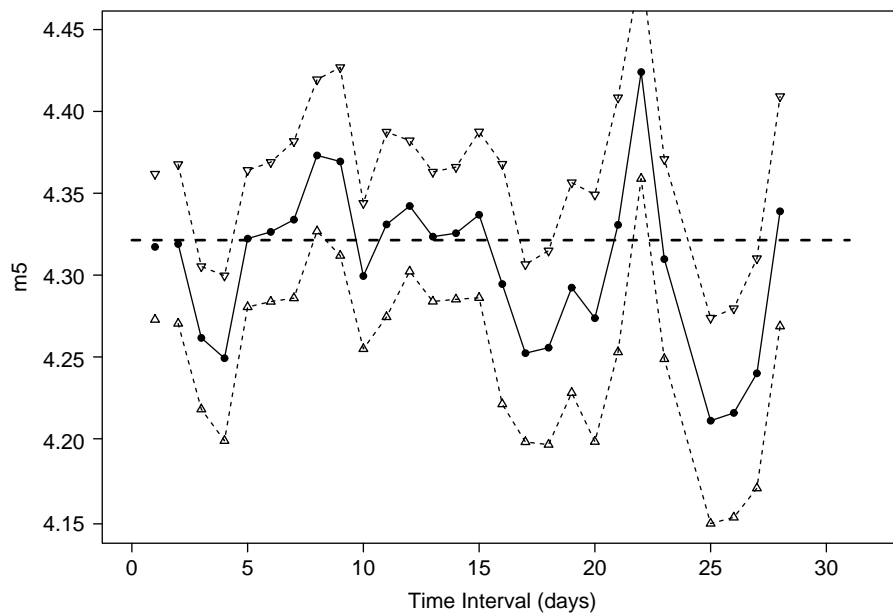

Figure S2.261. MLE of  $m_5$  by Time Interval Compared to Overall Mean (4.3214) for  $p = 6$  and  $f(t) = \sqrt{t}$ .



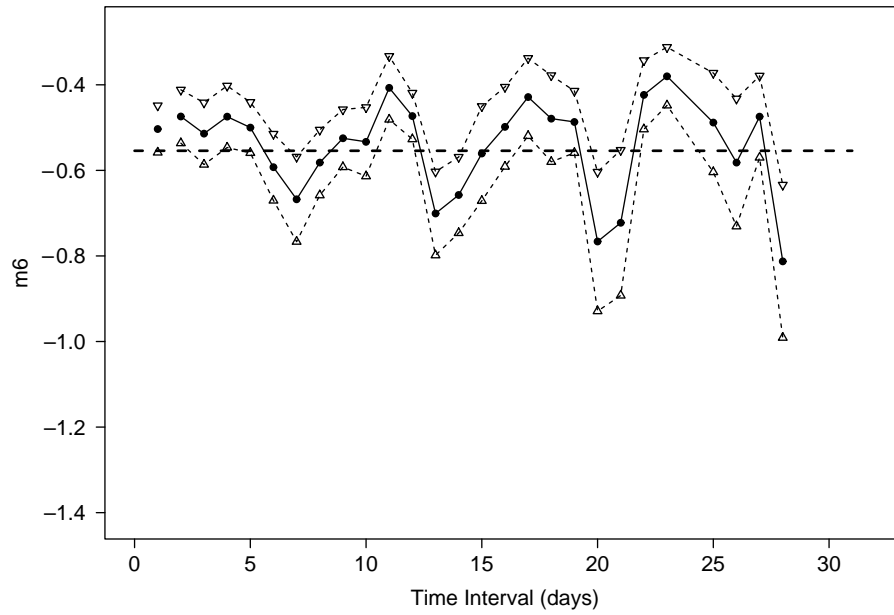

Figure S2.262. MLE of  $m_6$  by Time Interval Compared to Overall Mean ( $-0.5542$ ) for  $p = 6$  and  $f(t) = \sqrt{t}$ .

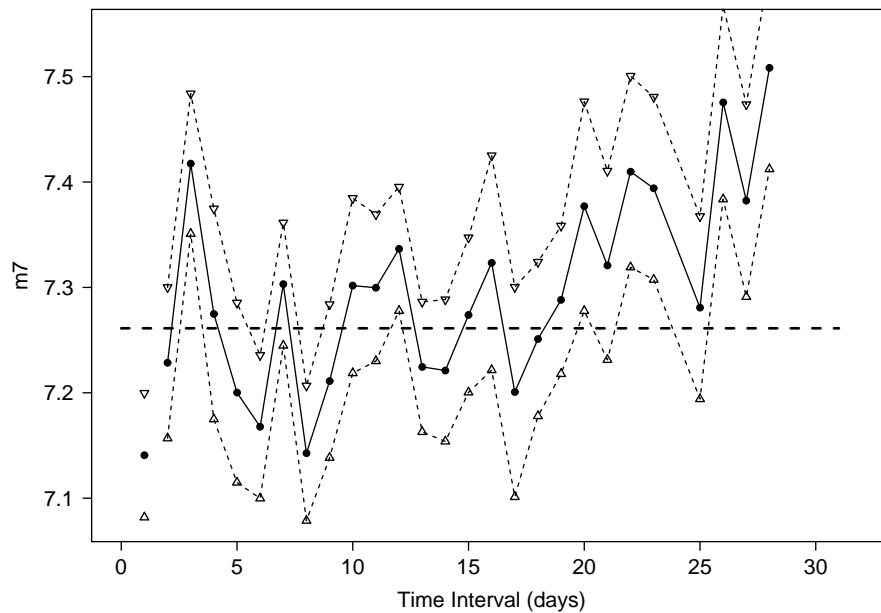

Figure S2.263. MLE of  $m_7$  by Time Interval Compared to Overall Mean ( $7.2612$ ) for  $p = 6$  and  $f(t) = \sqrt{t}$ .

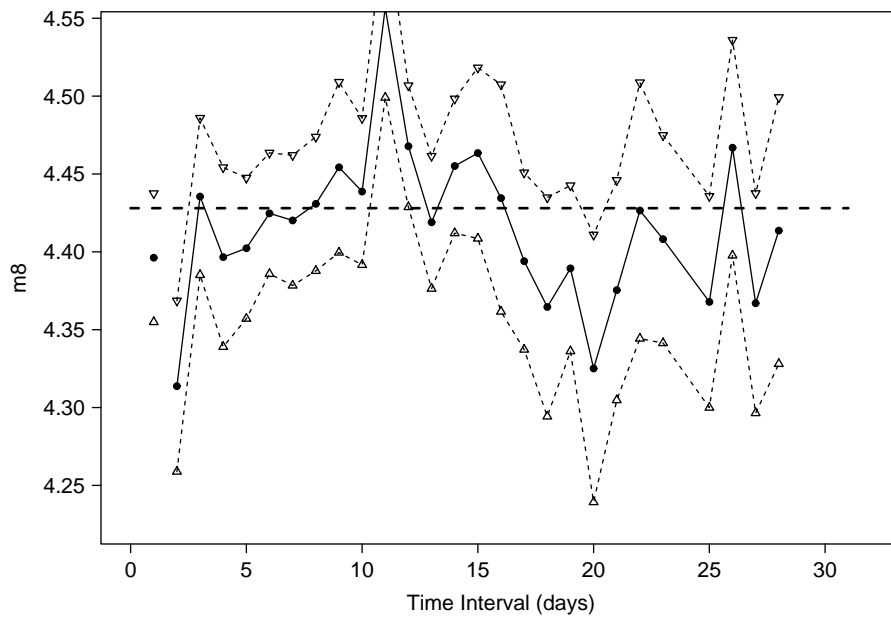

Figure S2.264. MLE of  $m_8$  by Time Interval Compared to Overall Mean (4.428) for  $p = 6$  and  $f(t) = \sqrt{t}$ .

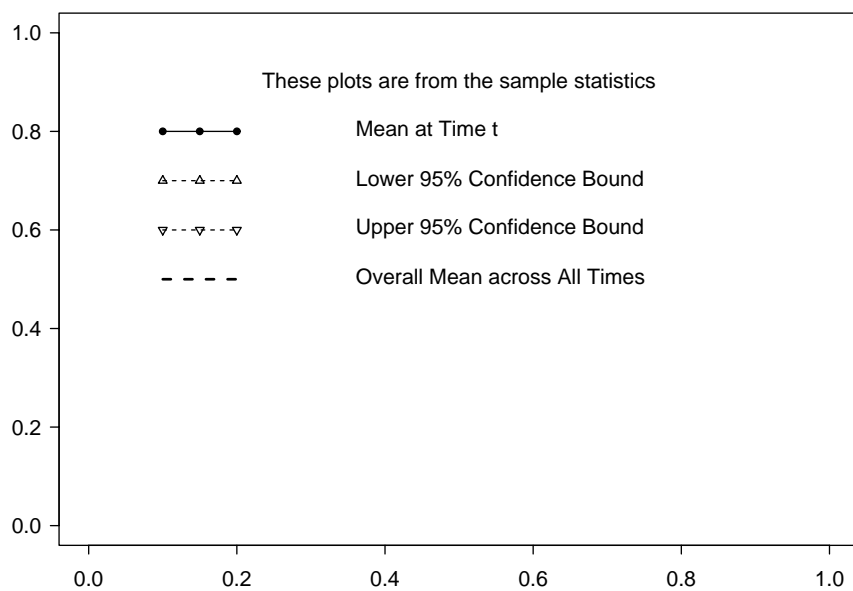

Legend for Mean Plots by Time Interval (Figures S3.10–S3.189).

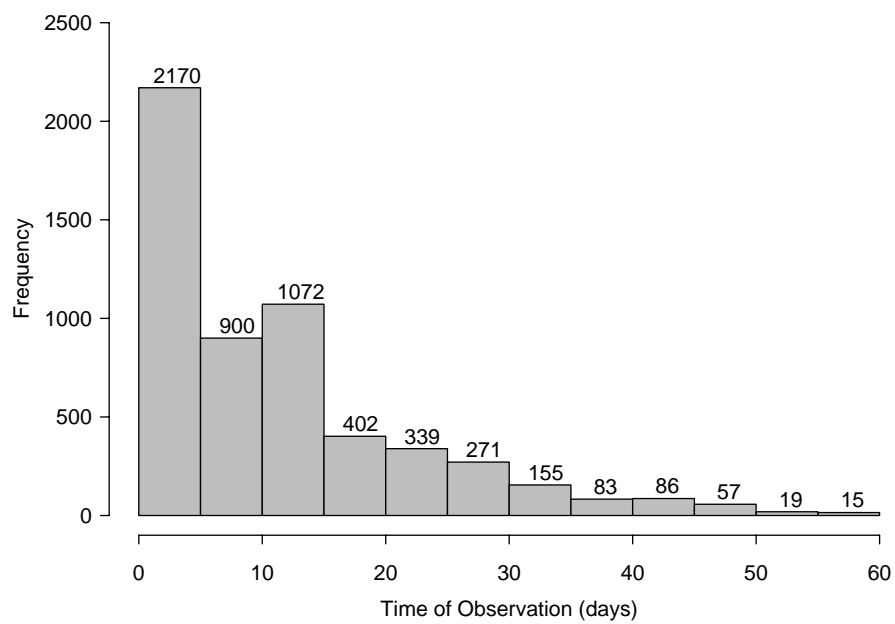

Figure S3.1. Number of Observations by Day of Observation.

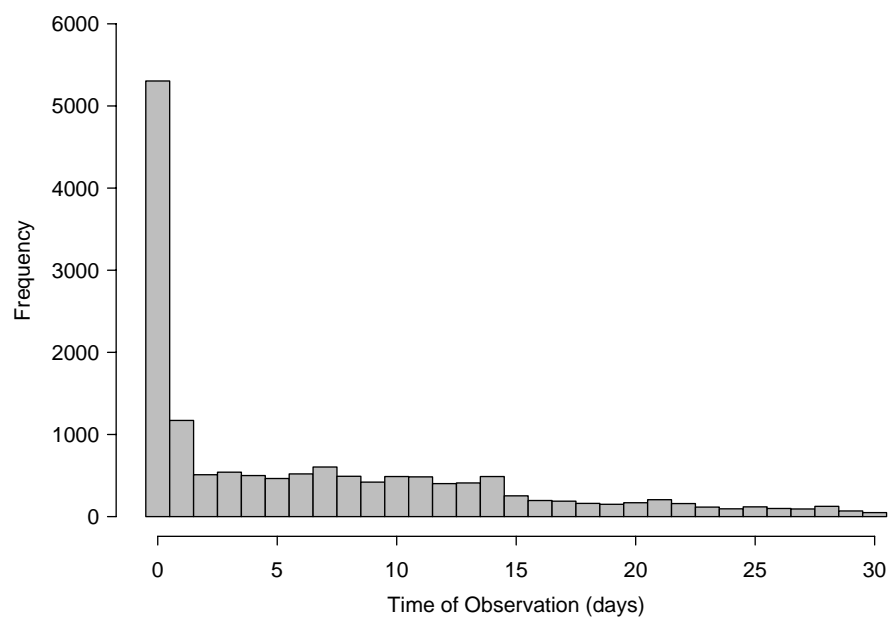

Figure S3.2. Number of ALT Observations by Time Interval.

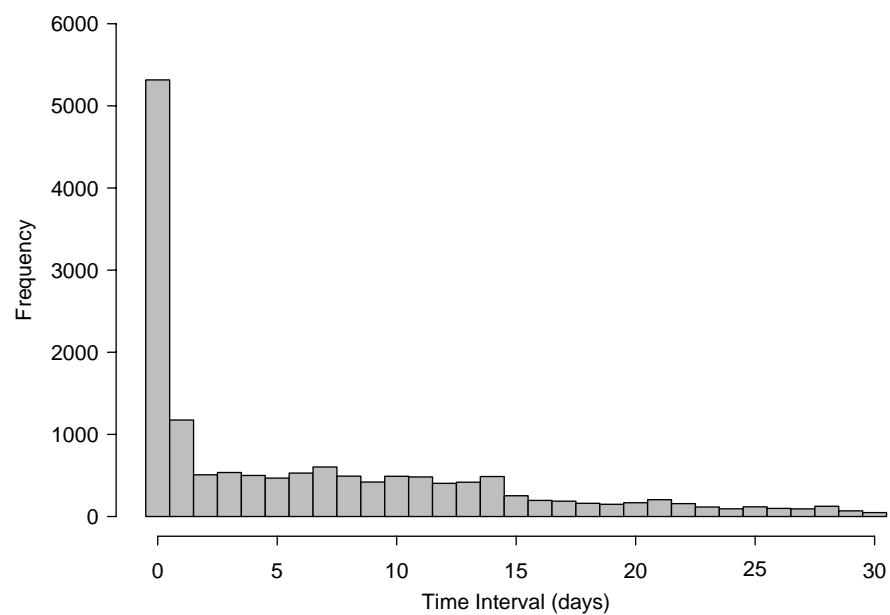

Figure S3.3. Number of ALT Observations by Time Interval.

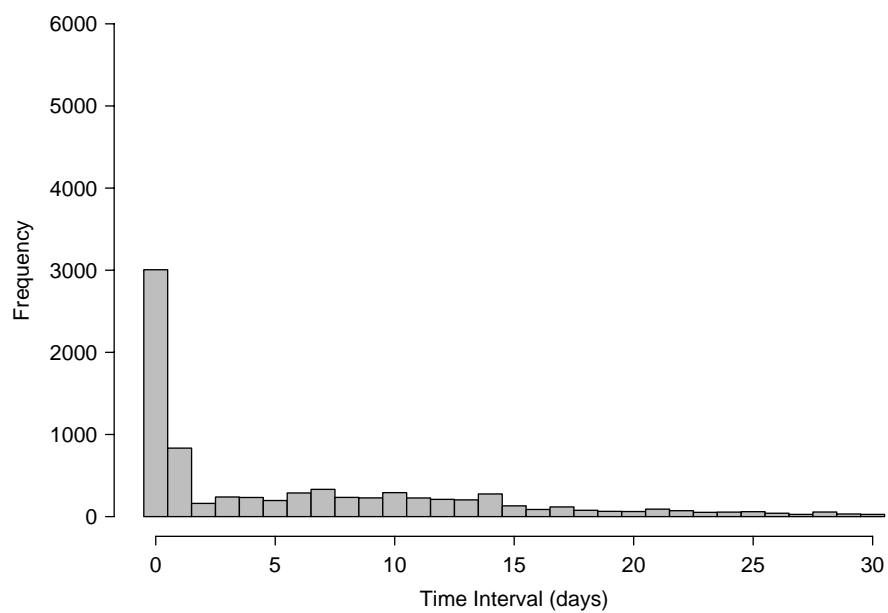

Figure S3.4. Number of ALT Observations by Time Interval.

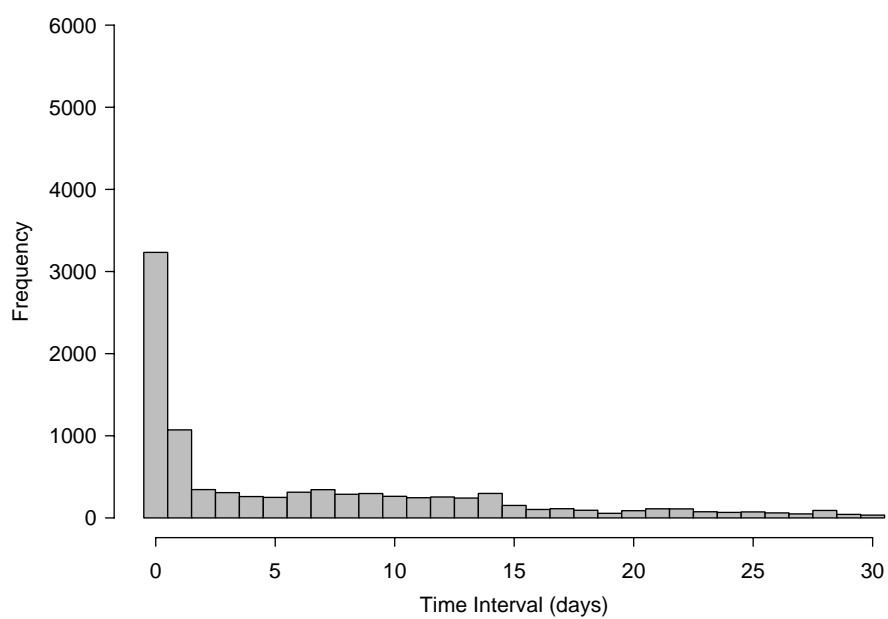

Figure S3.5. Number of ALT Observations by Time Interval.

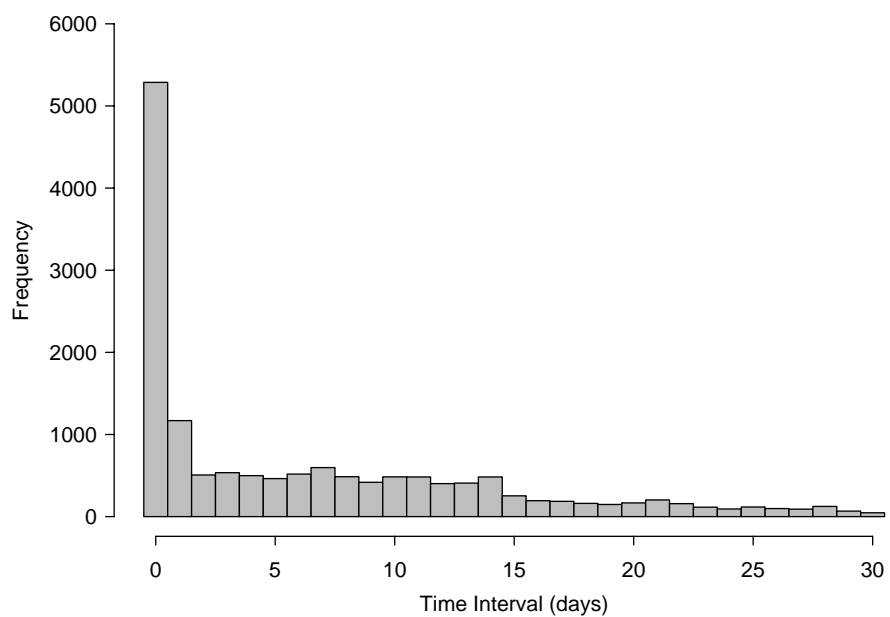

Figure S3.6. Number of ALT Observations by Time Interval.

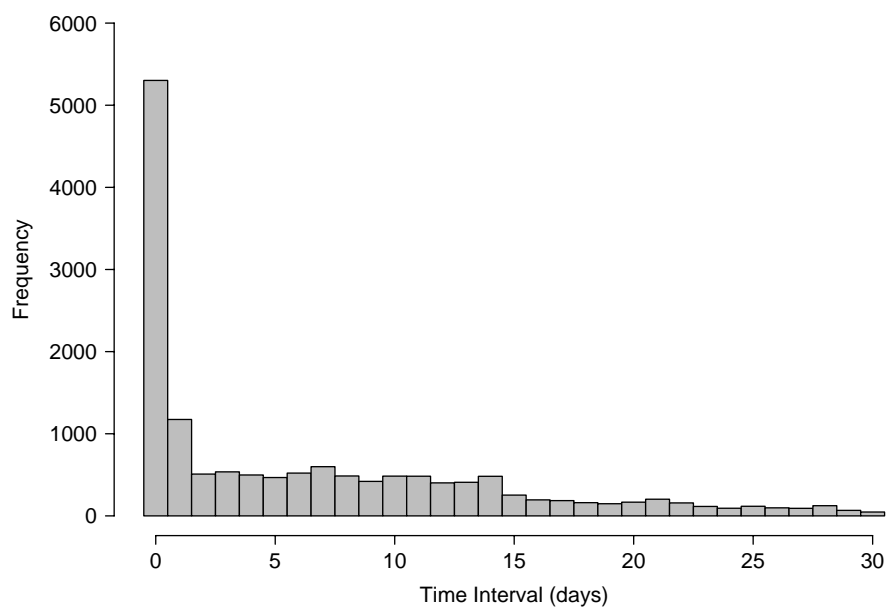

Figure S3.7. Number of ALT Observations by Time Interval.

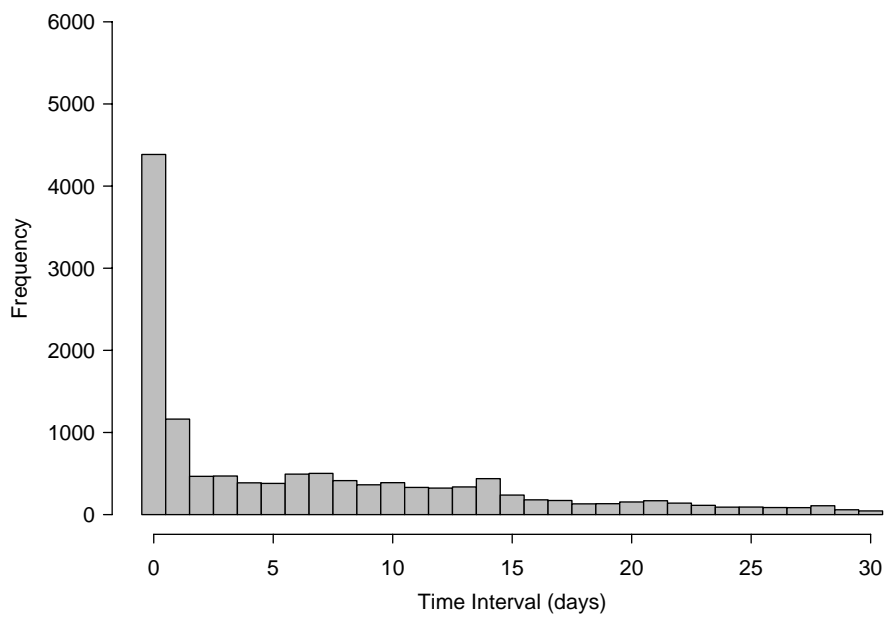

Figure S3.8. Number of ALT Observations by Time Interval.

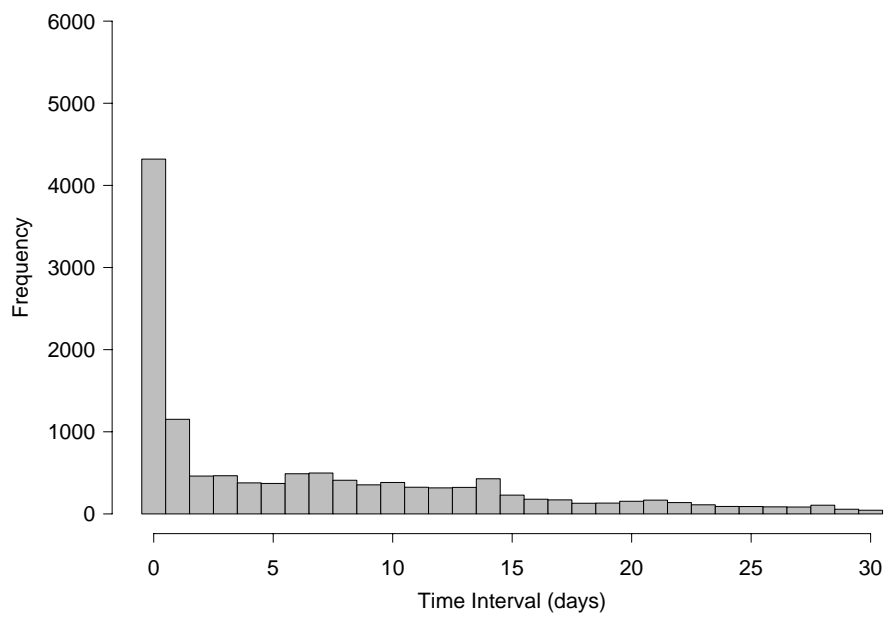

Figure S3.9. Number of ALT Observations by Time Interval.

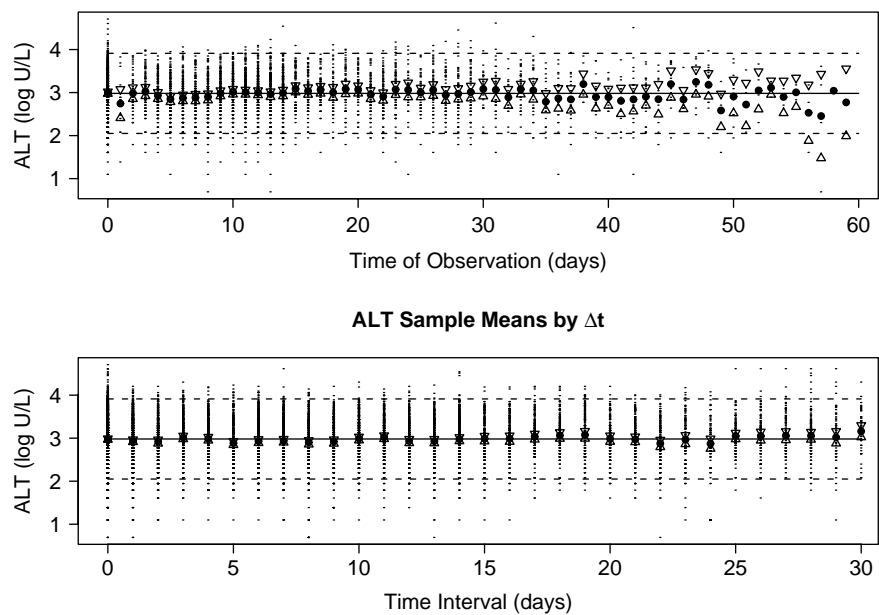

Figure S3.10. ALT Sample Means by Day of Observation.

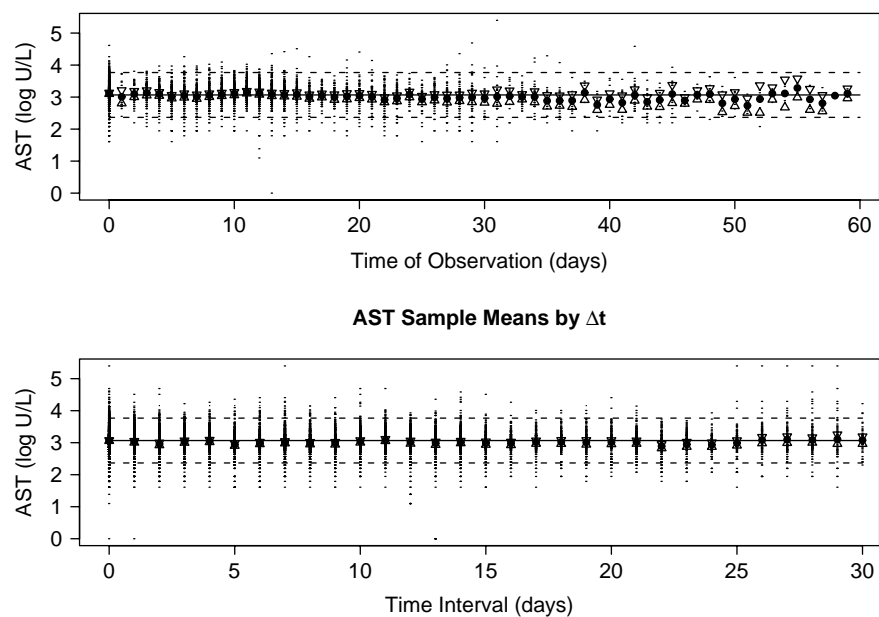

Figure S3.11. AST Sample Means by Day of Observation.



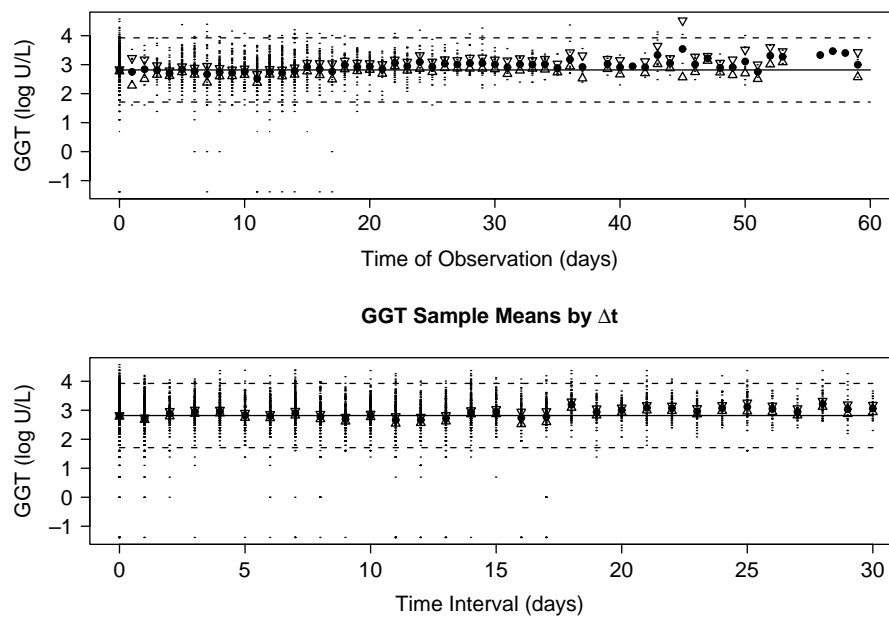

Figure S3.12. GGT Sample Means by Day of Observation.

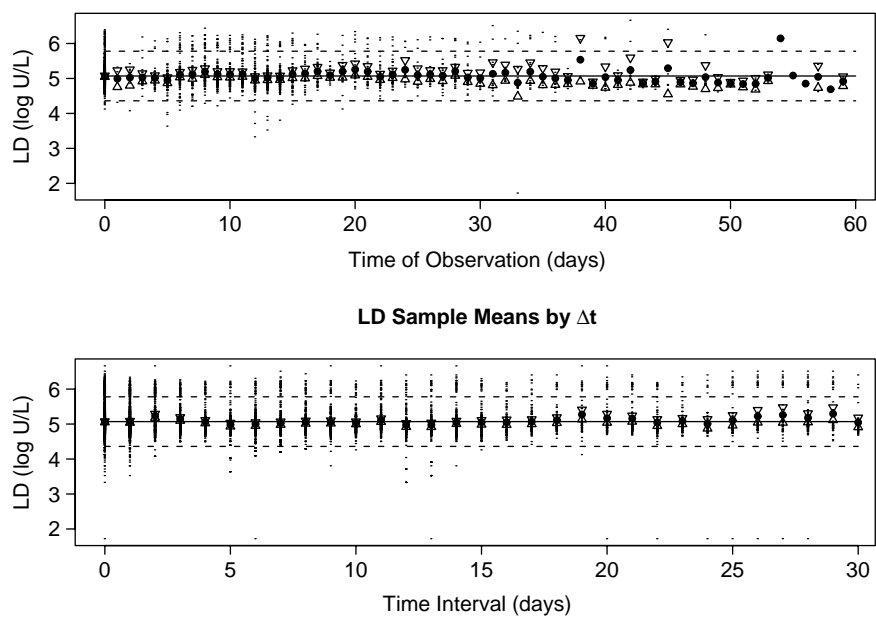

Figure S3.13. LD Sample Means by Day of Observation.

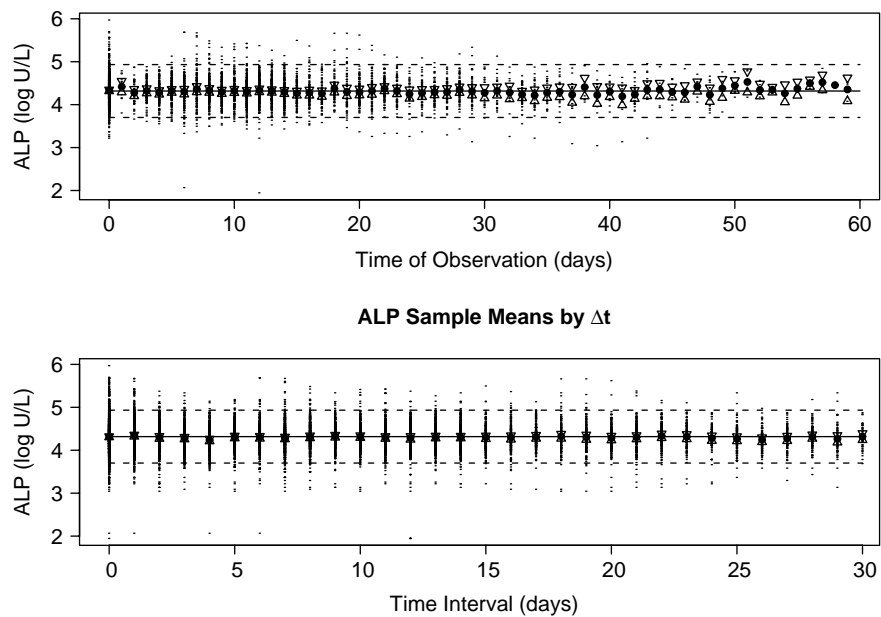

Figure S3.14. ALP Sample Means by Day of Observation.

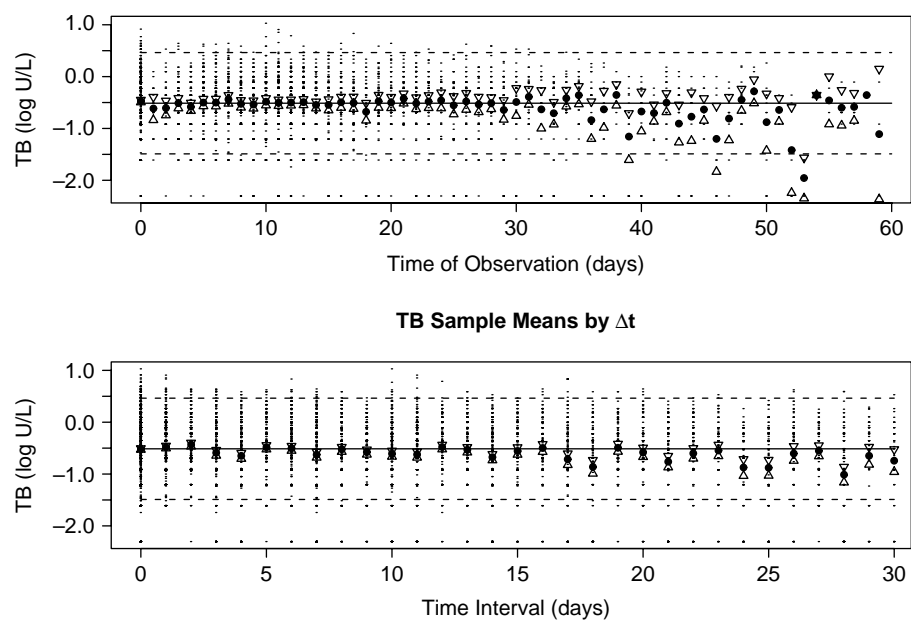

Figure S3.15. TB Sample Means by Day of Observation.

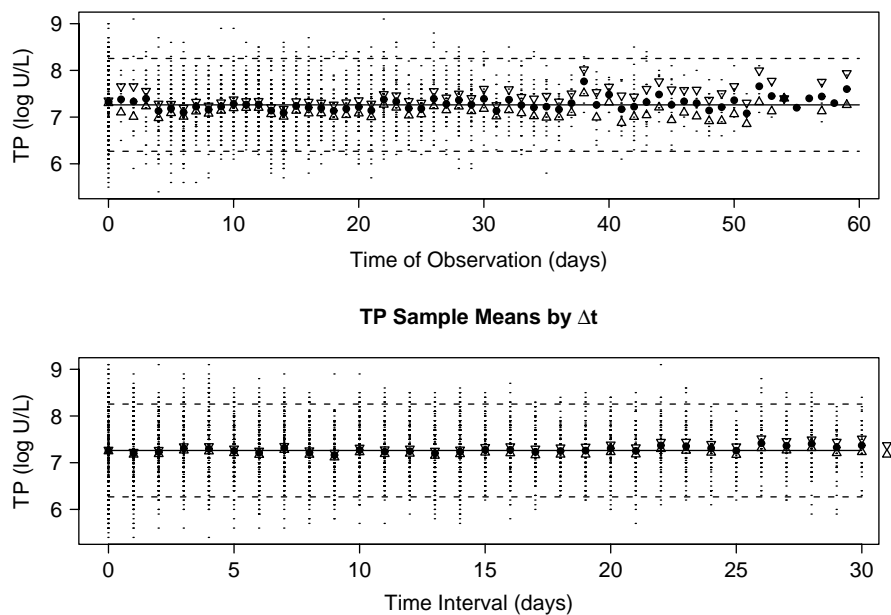

Figure S3.16. TP Sample Means by Day of Observation.

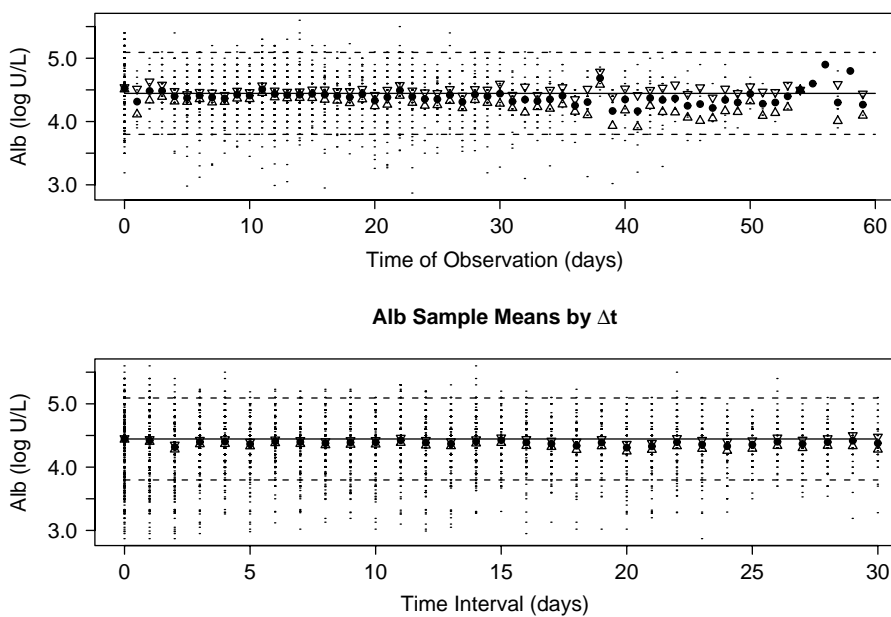

Figure S3.17. Alb Sample Means by Day of Observation.

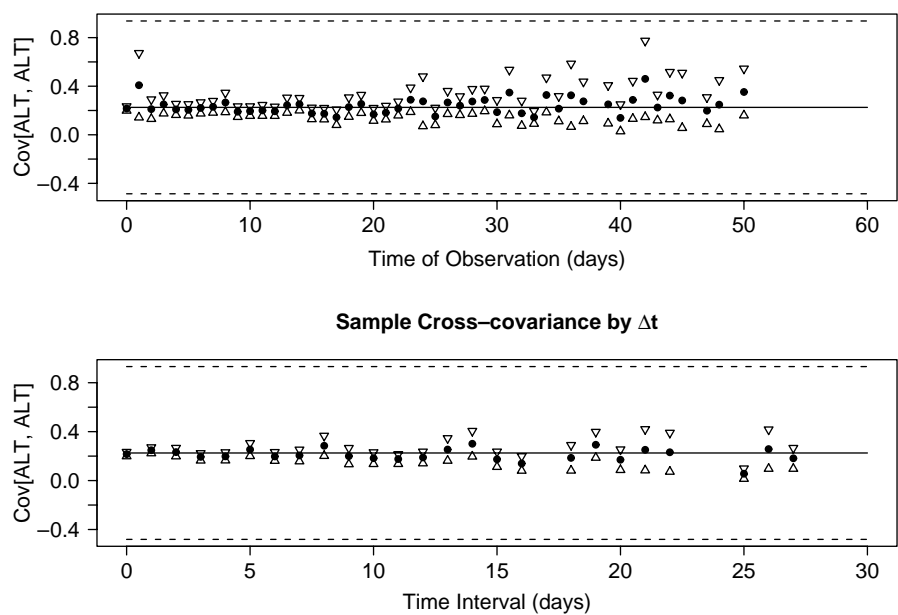

Figure S3.18. ALT and ALT Sample Cross-covariance by Day of Observation.

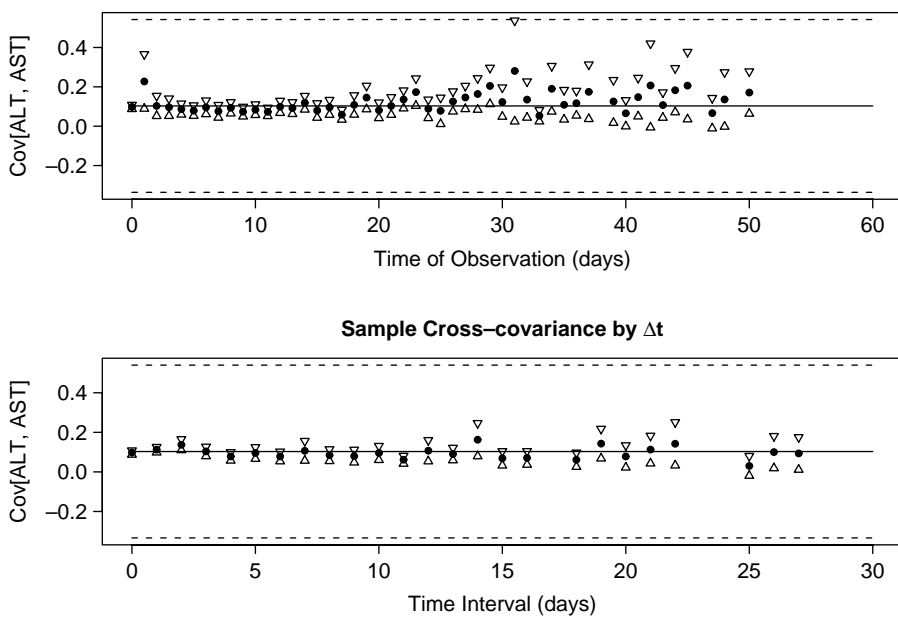

Figure S3.19. ALT and AST Sample Cross-covariance by Day of Observation.

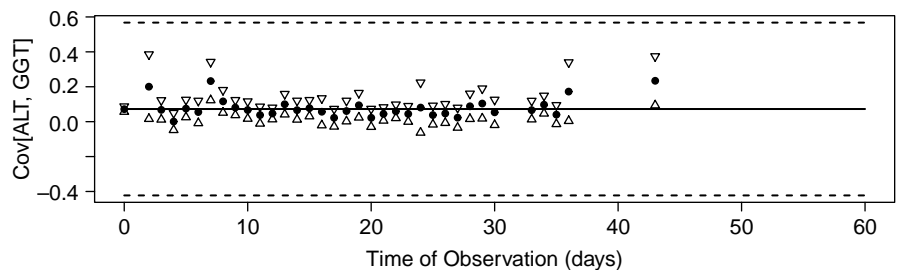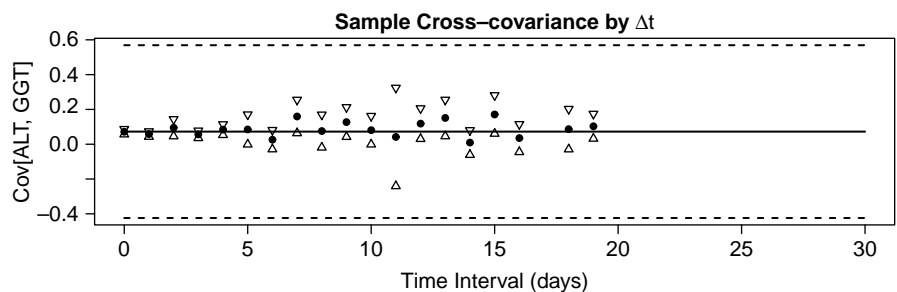

Figure S3.20. ALT and GGT Sample Cross-covariance by Day of Observation.

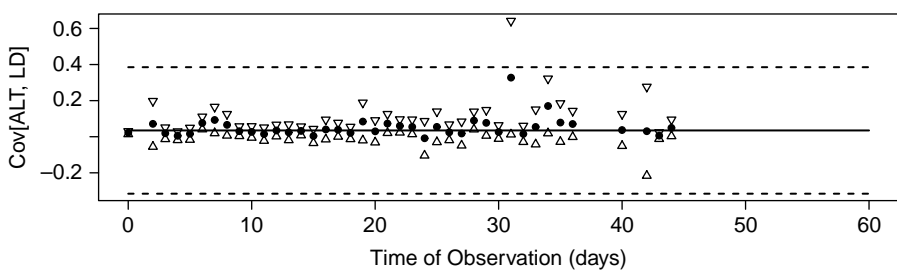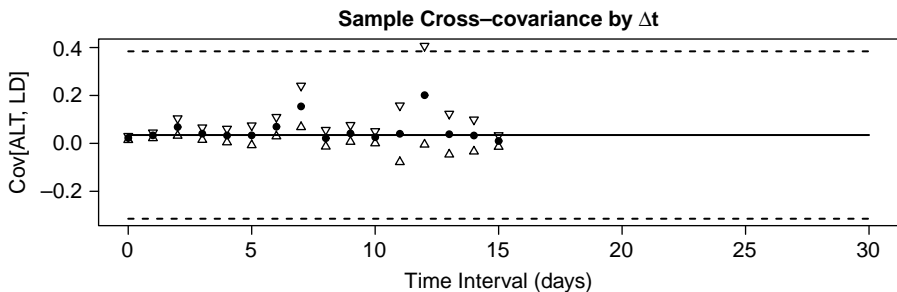

Figure S3.21. ALT and LD Sample Cross-covariance by Day of Observation.

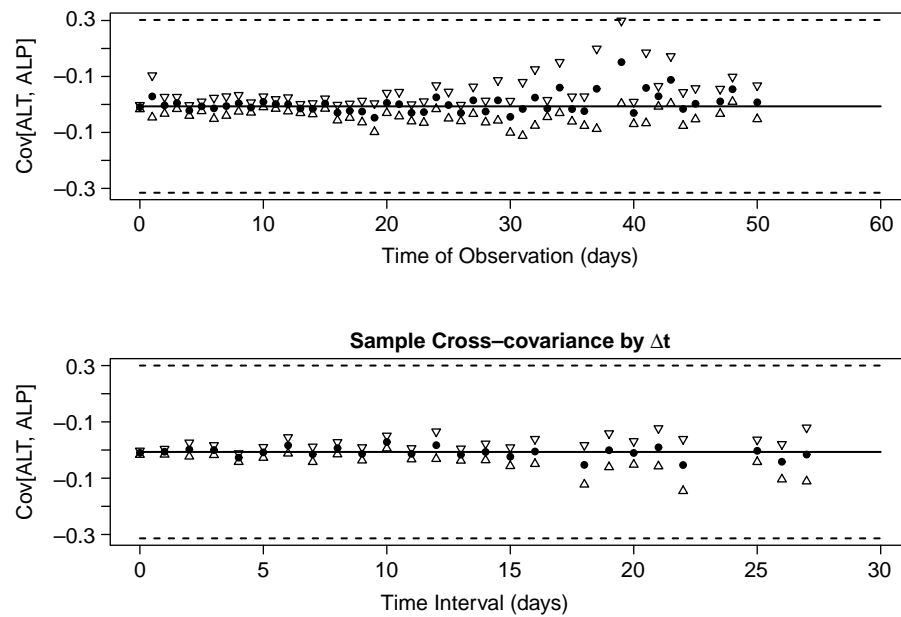

Figure S3.22. ALT and ALP Sample Cross-covariance by Day of Observation.

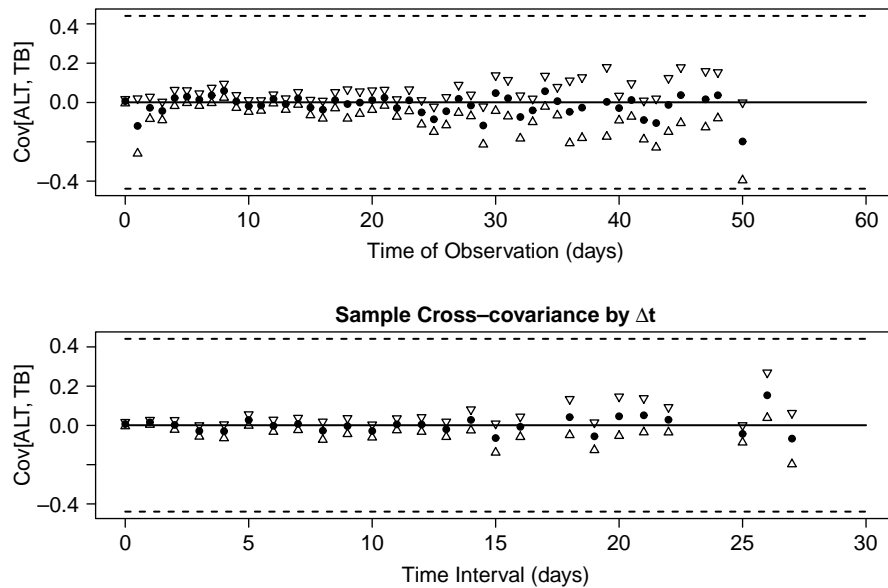

Figure S3.23. ALT and TB Sample Cross-covariance by Day of Observation.

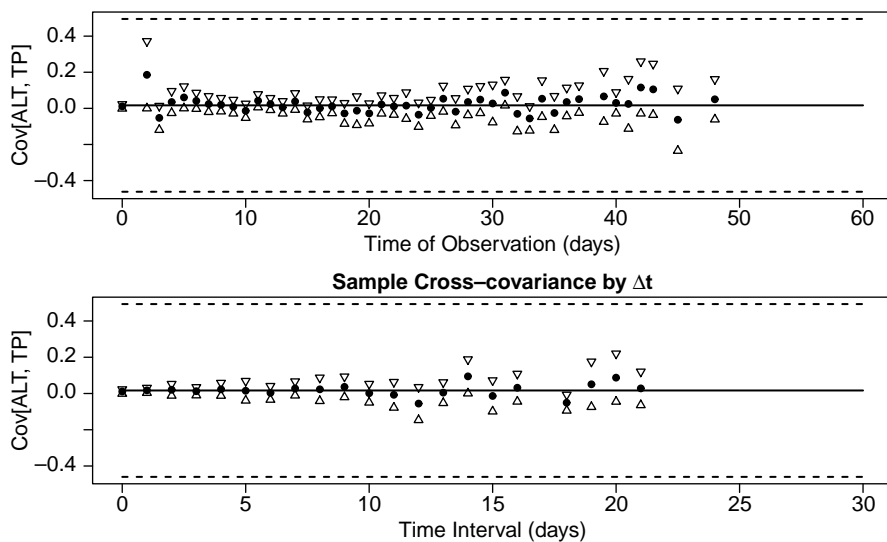

Figure S3.24. ALT and TP Sample Cross-covariance by Day of Observation.

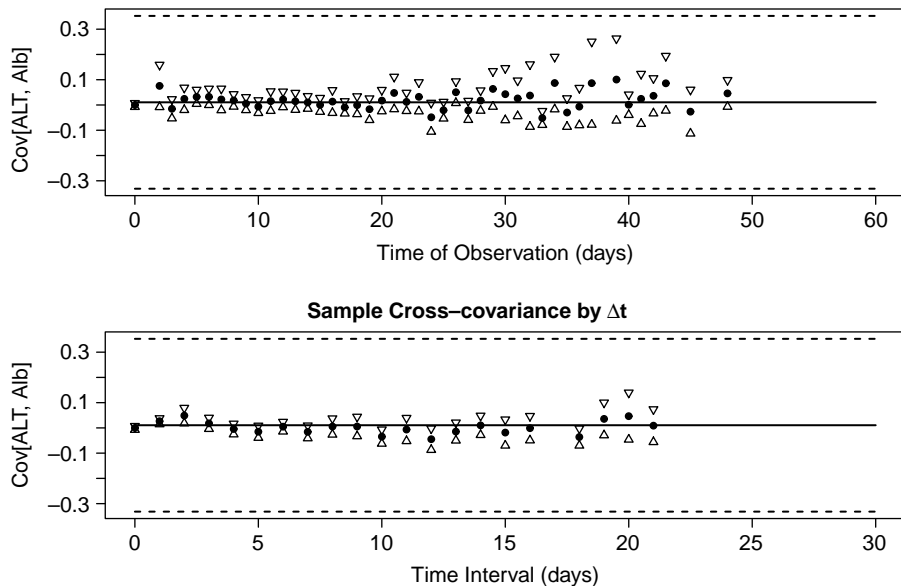

Figure S3.25. ALT and Alb Sample Cross-covariance by Day of Observation.

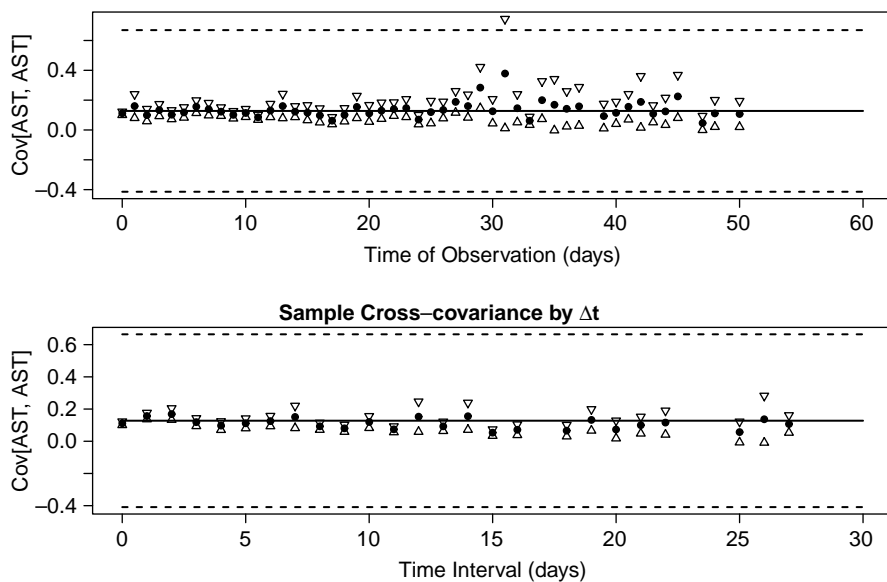

Figure S3.26. AST and AST Sample Cross-covariance by Day of Observation.

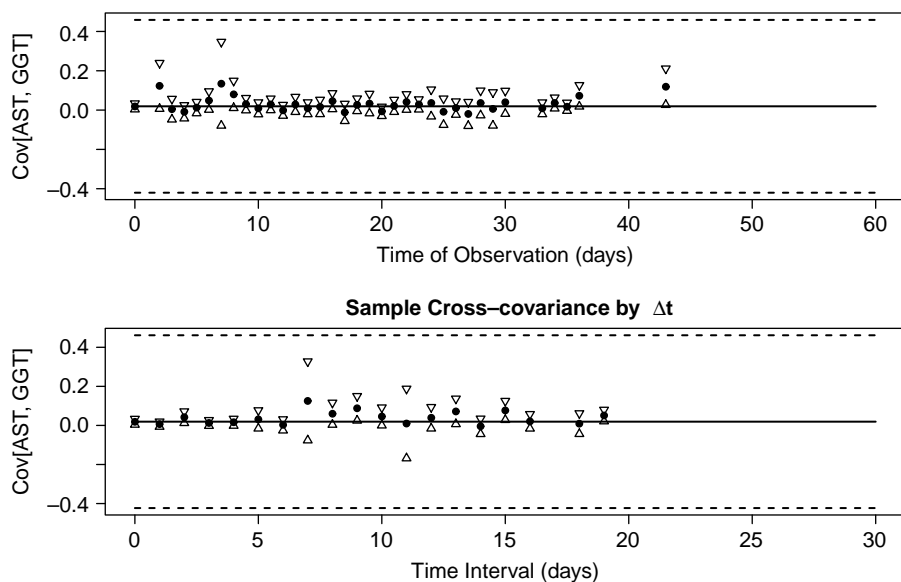

Figure S3.27. AST and GGT Sample Cross-covariance by Day of Observation.



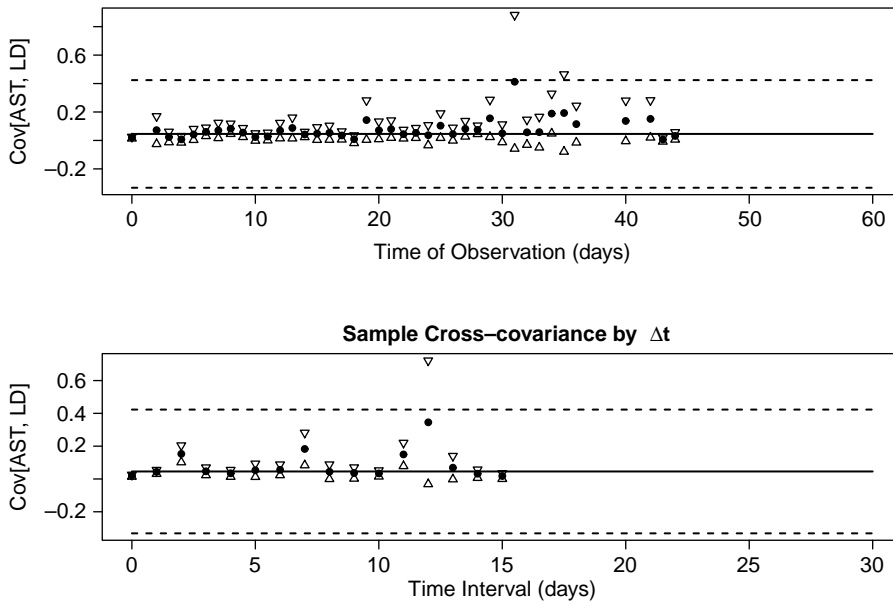

Figure S3.28. AST and LD Sample Cross-covariance by Day of Observation.

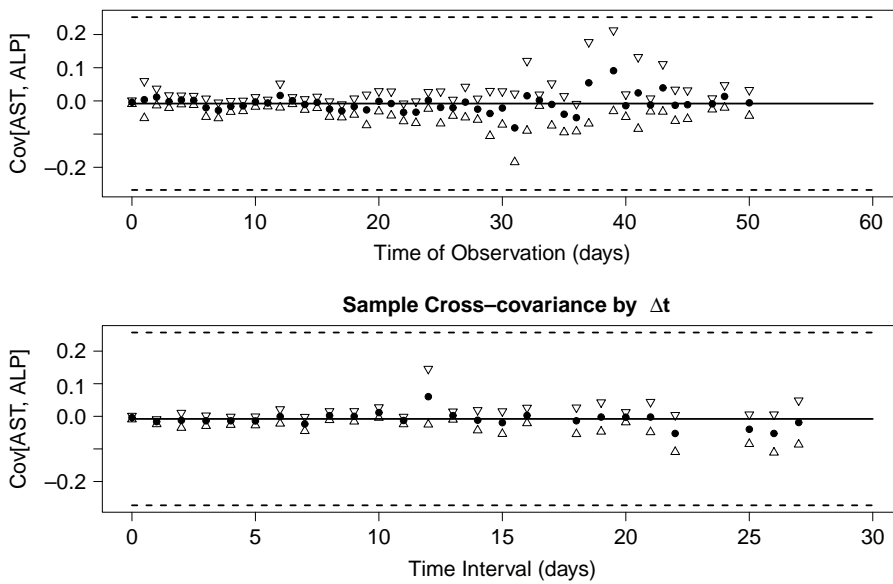

Figure S3.29. AST and ALP Sample Cross-covariance by Day of Observation.

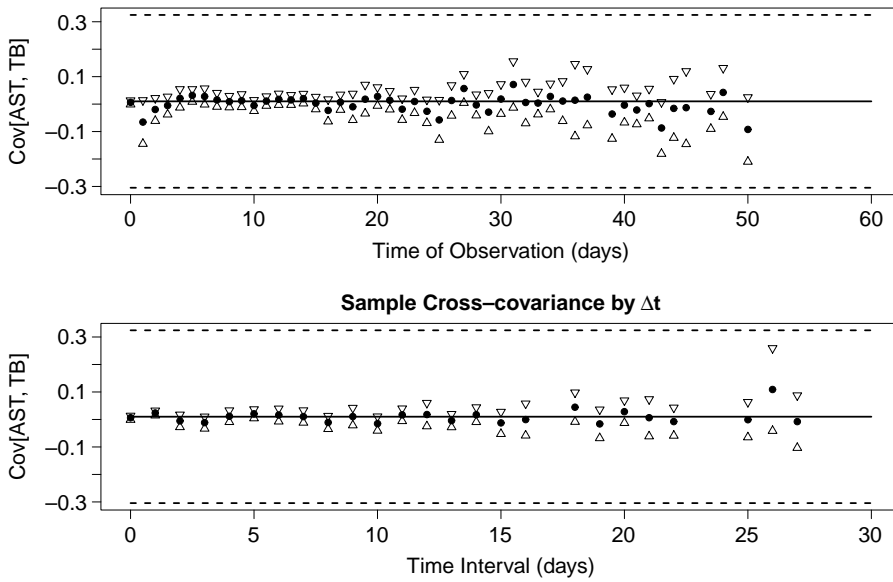

Figure S3.30. AST and TB Sample Cross-covariance by Day of Observation.

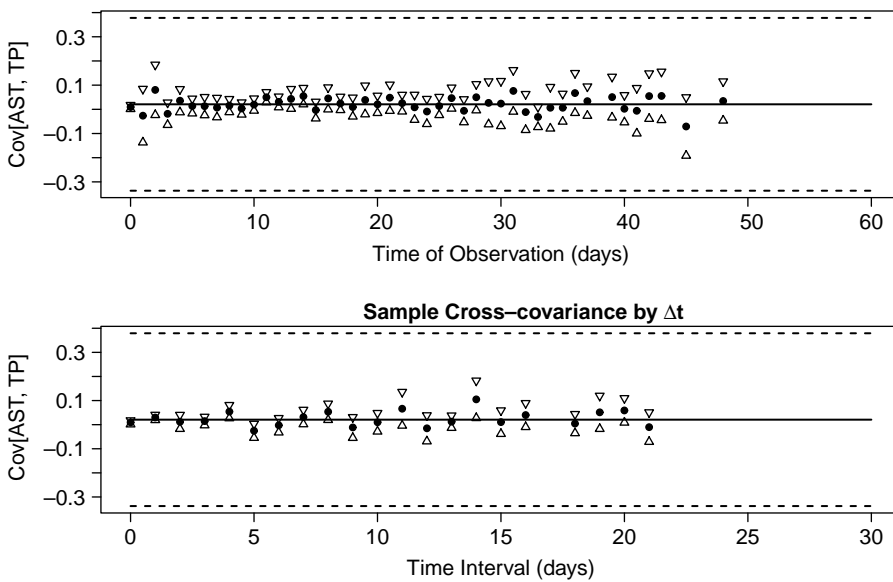

Figure S3.31. AST and TP Sample Cross-covariance by Day of Observation.

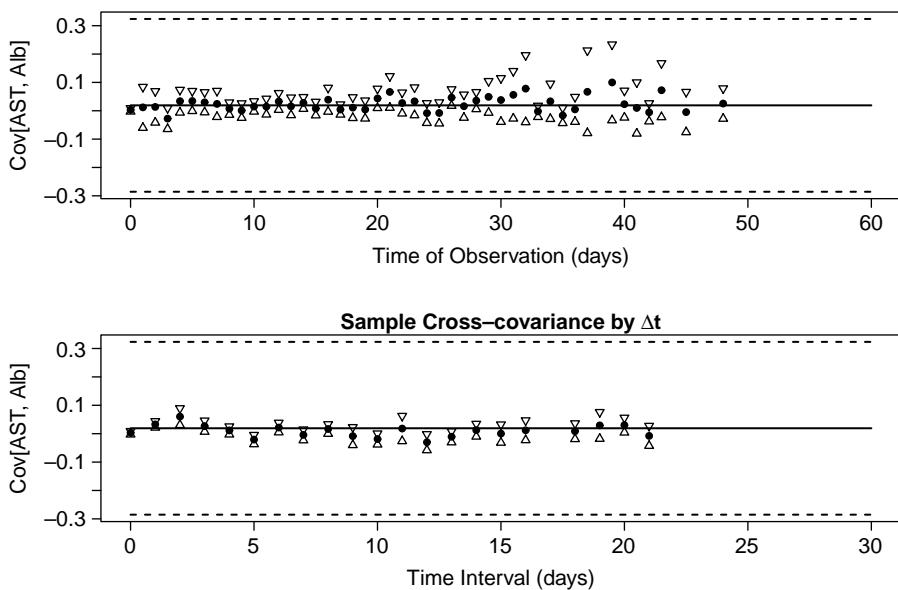

Figure S3.32. AST and Alb Sample Cross-covariance by Day of Observation.

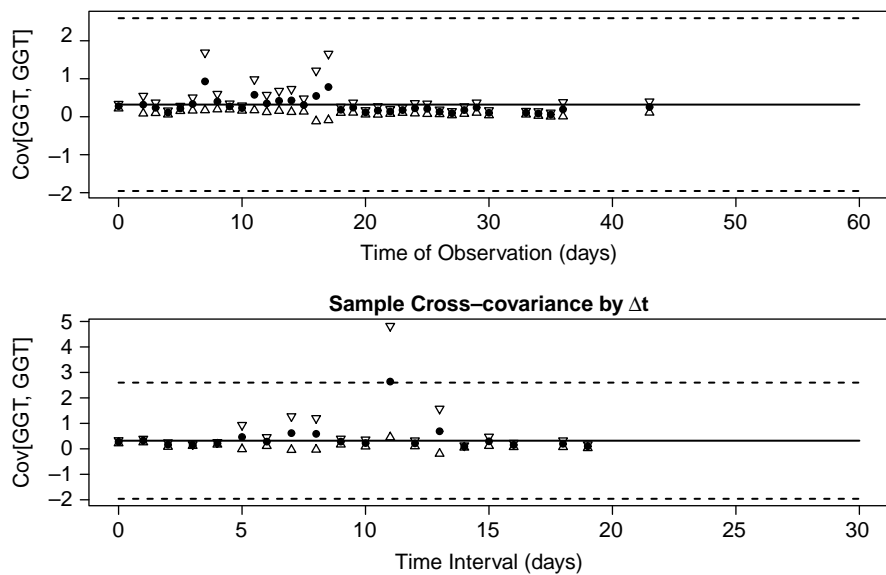

Figure S3.33. GGT and GGT Sample Cross-covariance by Day of Observation.

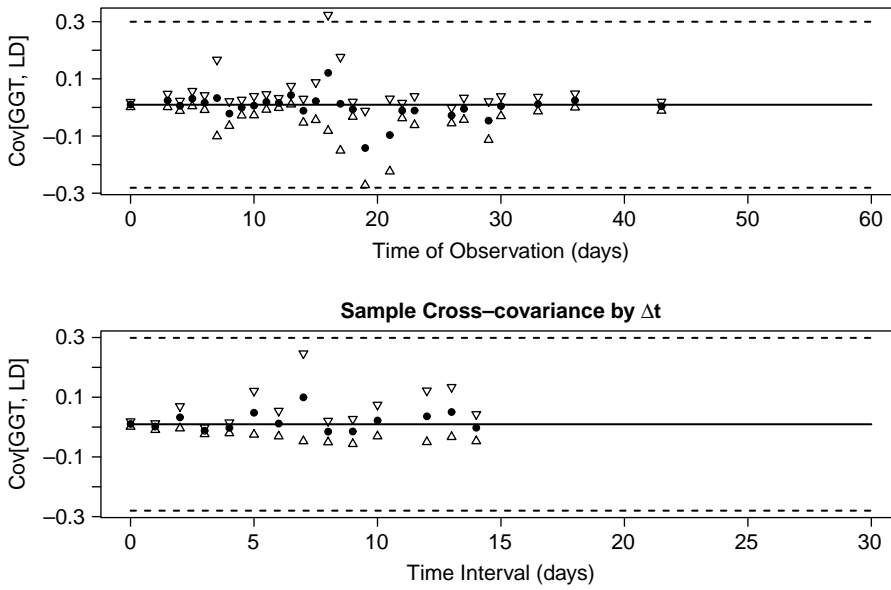

Figure S3.34. GGT and LD Sample Cross-covariance by Day of Observation.

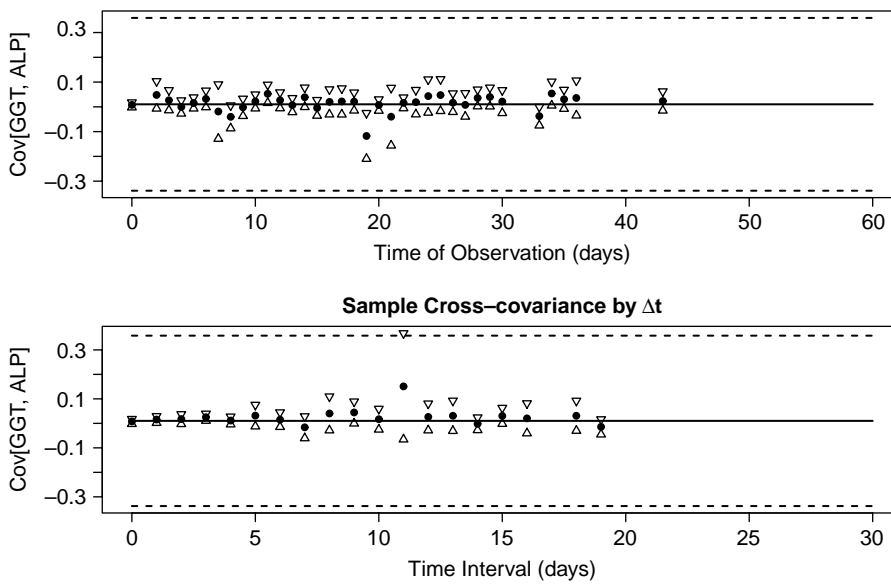

Figure S3.35. GGT and ALP Sample Cross-covariance by Day of Observation.

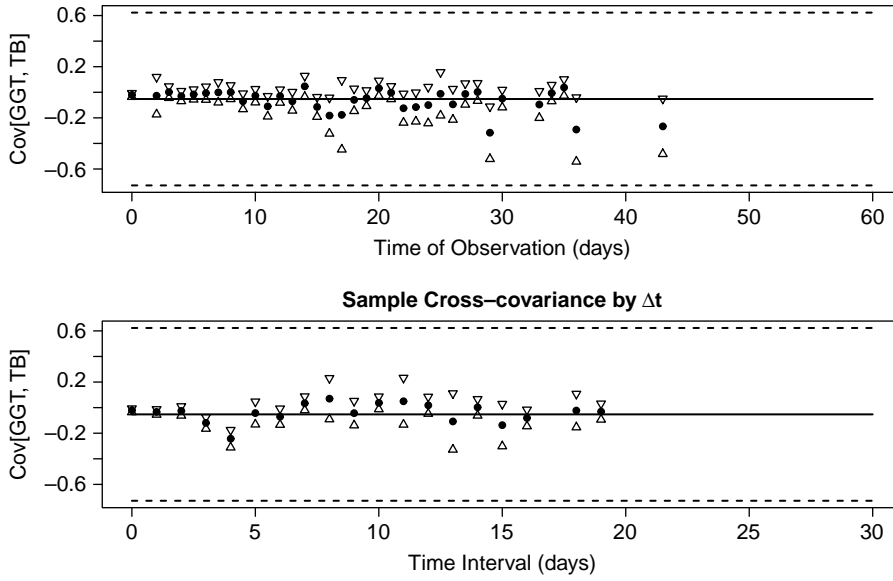

Figure S3.36. GGT and TB Sample Cross-covariance by Day of Observation.

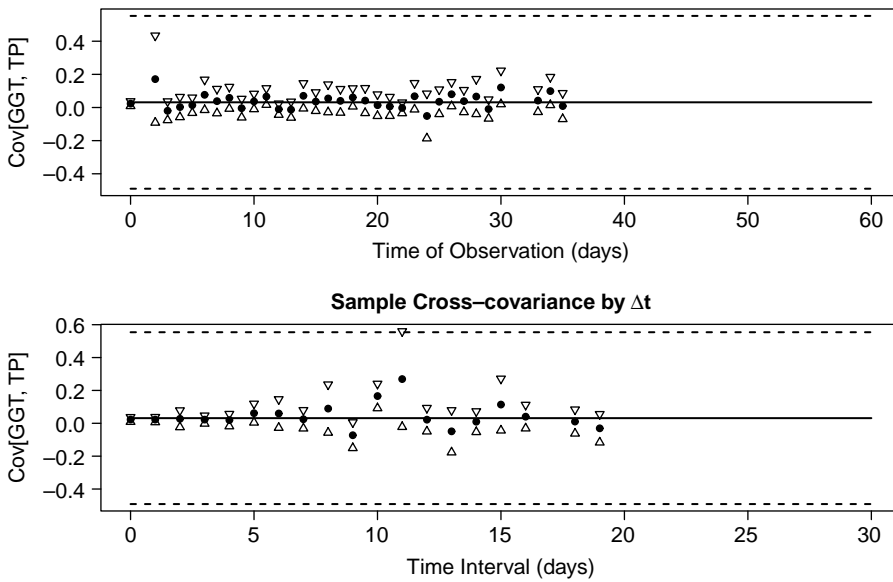

Figure S3.37. GGT and TP Sample Cross-covariance by Day of Observation.

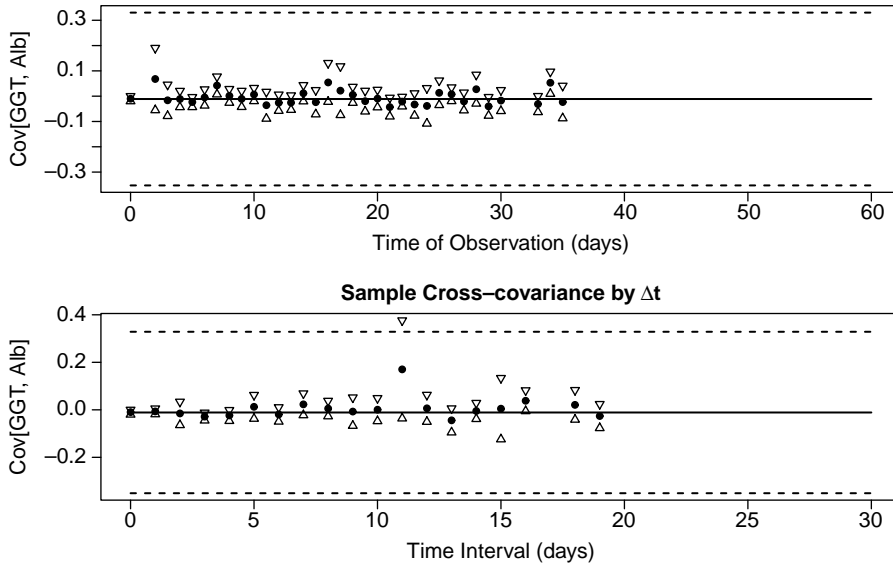

Figure S3.38. GGT and Alb Sample Cross-covariance by Day of Observation.

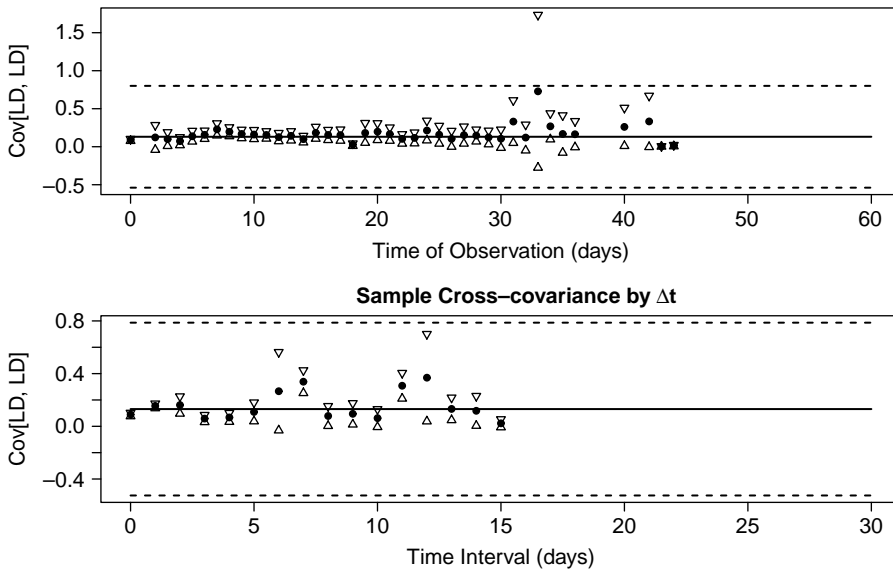

Figure S3.39. LD and LD Sample Cross-covariance by Day of Observation.

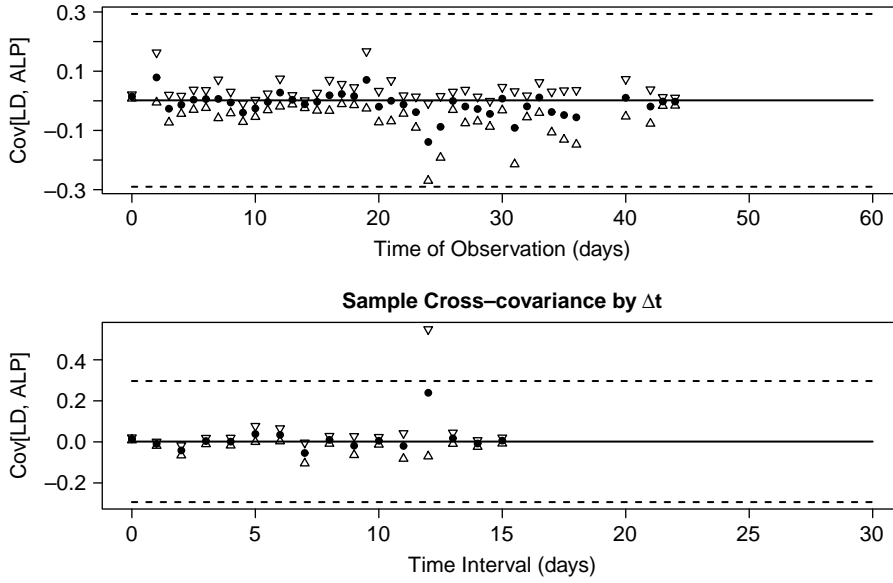

Figure S3.40. LD and ALP Sample Cross-covariance by Day of Observation.

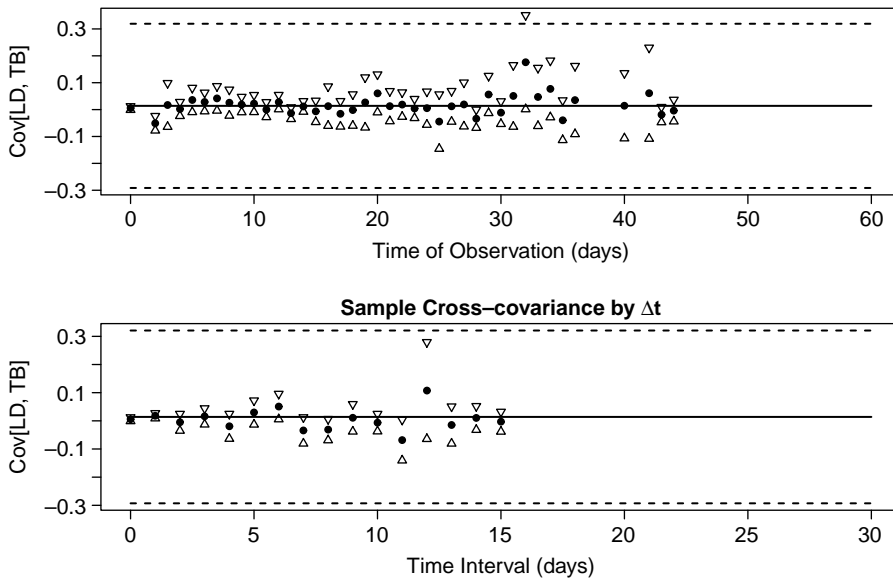

Figure S3.41. LD and TB Sample Cross-covariance by Day of Observation.

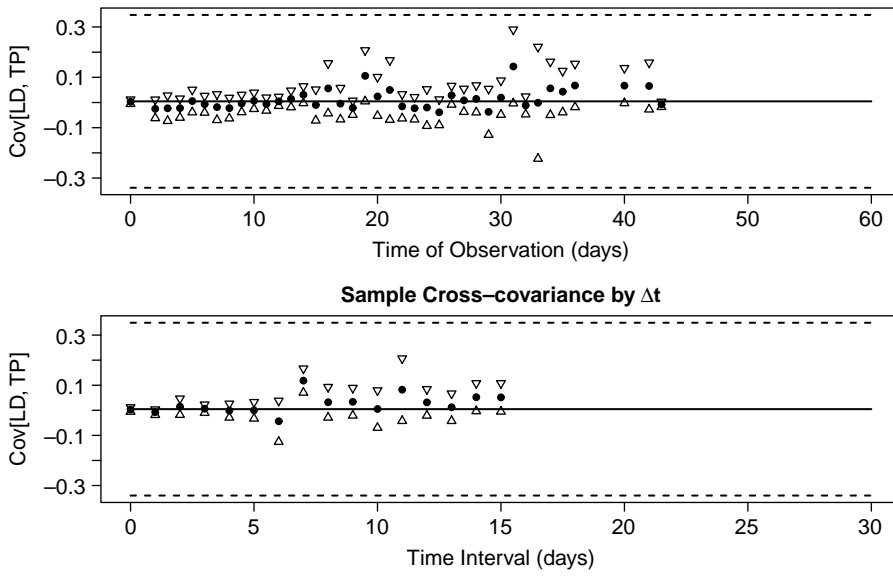

Figure S3.42. LD and TP Sample Cross-covariance by Day of Observation.

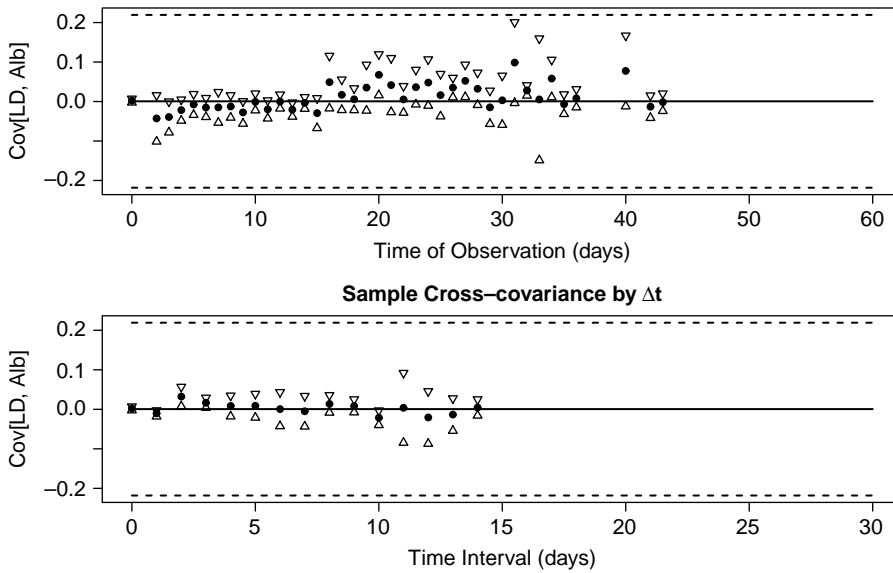

Figure S3.43. LD and Alb Sample Cross-covariance by Day of Observation.



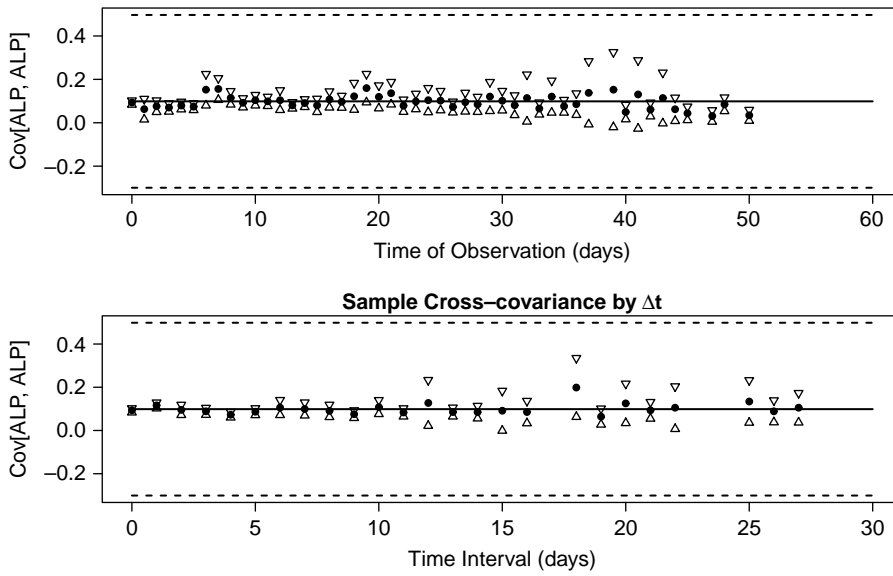

Figure S3.44. ALP and ALP Sample Cross-covariance by Day of Observation.

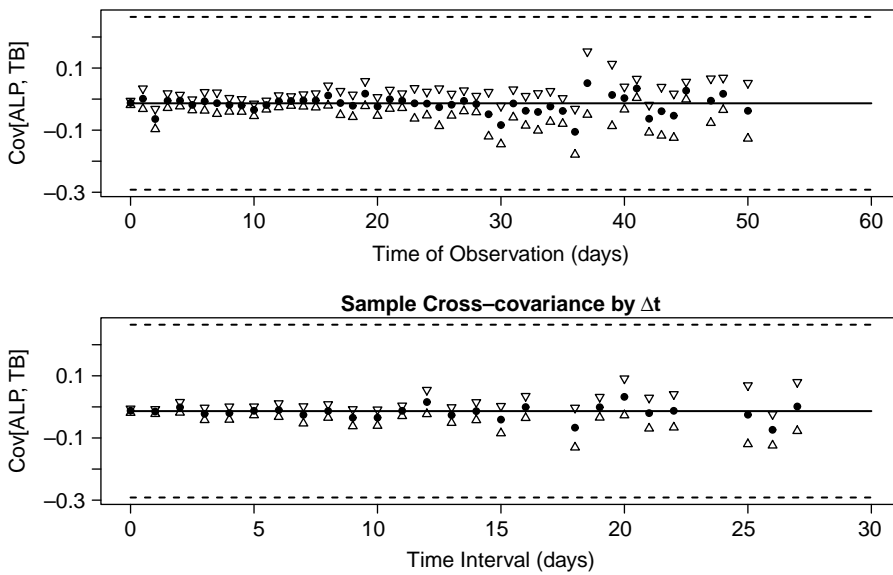

Figure S3.45. ALP and TB Sample Cross-covariance by Day of Observation.

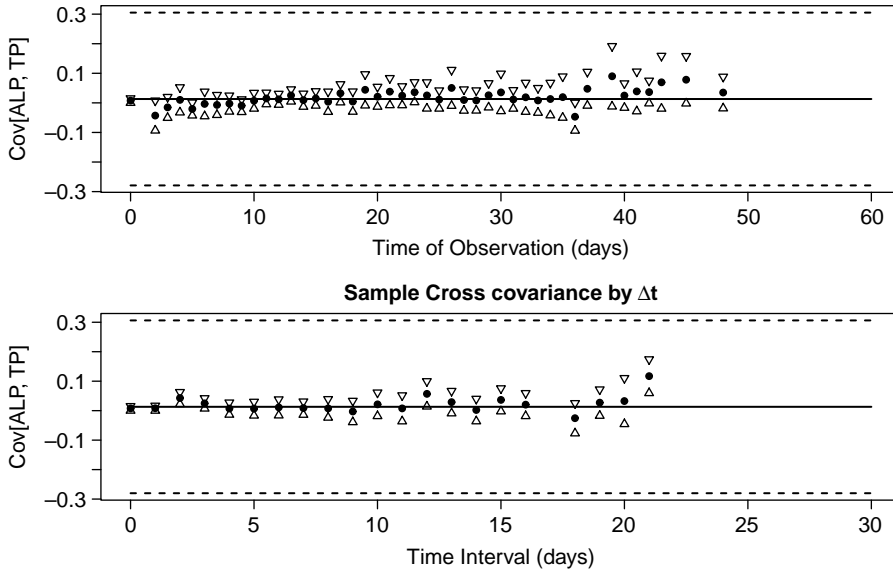

Figure S3.46. ALP and TP Sample Cross-covariance by Day of Observation.

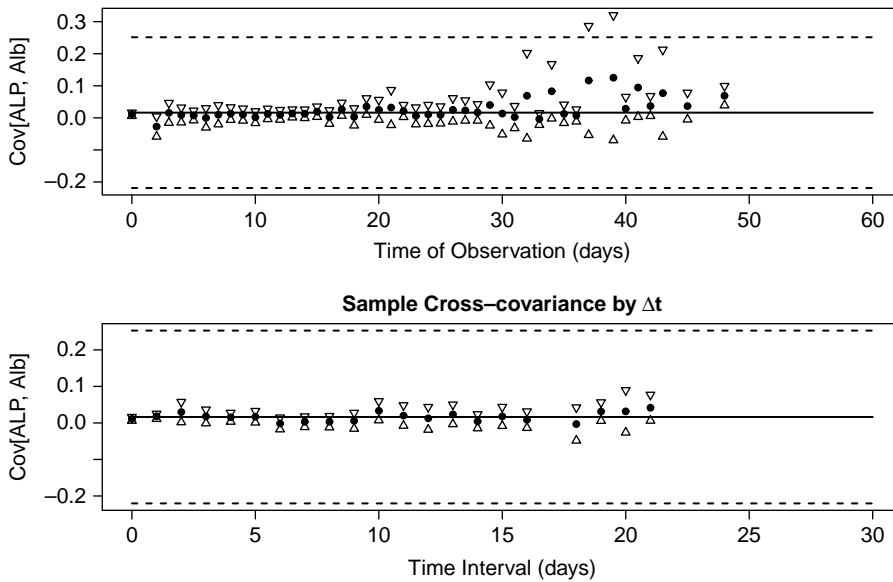

Figure S3.47. ALP and Alb Sample Cross-covariance by Day of Observation.

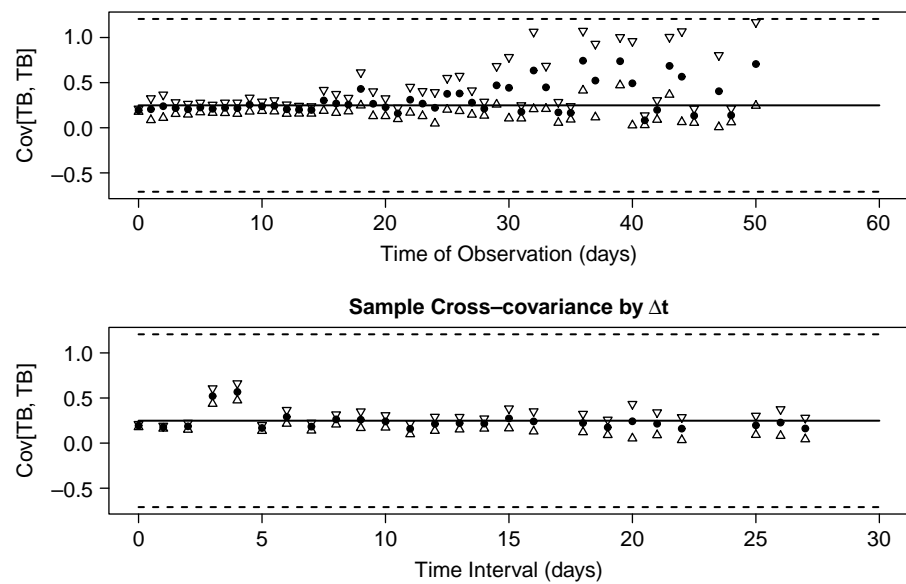

Figure S3.48. TB and TB Sample Cross-covariance by Day of Observation.

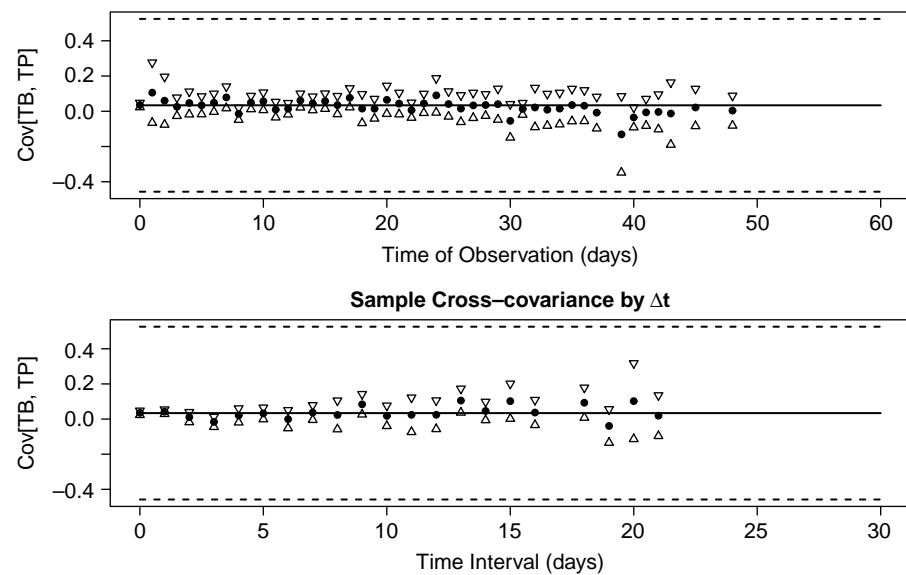

Figure S3.49. TB and TP Sample Cross-covariance by Day of Observation.

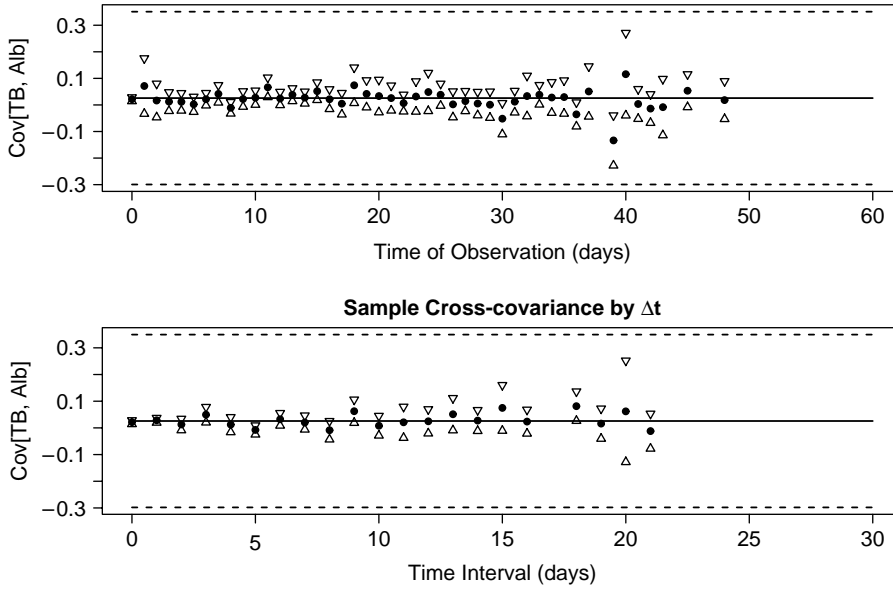

Figure S3.50. TB and Alb Sample Cross-covariance by Day of Observation.

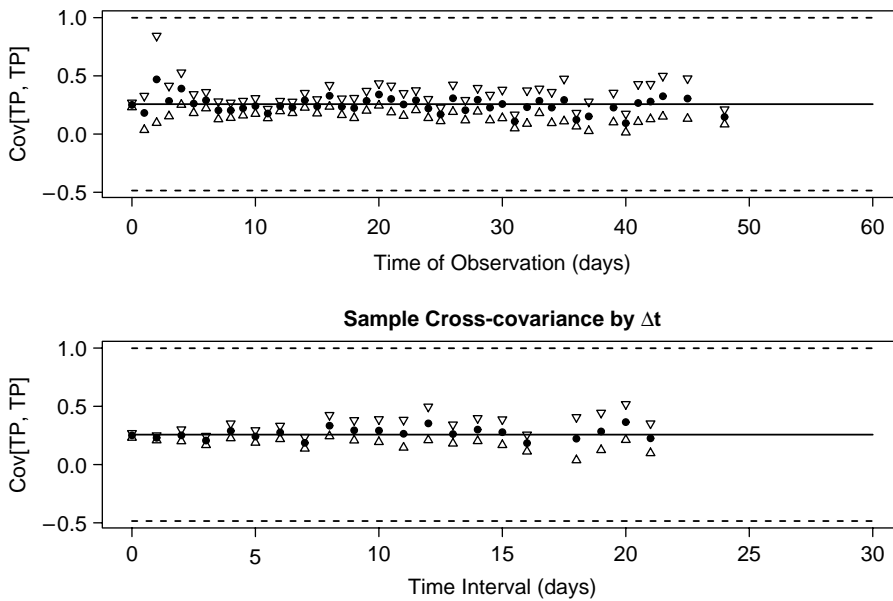

Figure S3.51. TP and TP Sample Cross-covariance by Day of Observation.

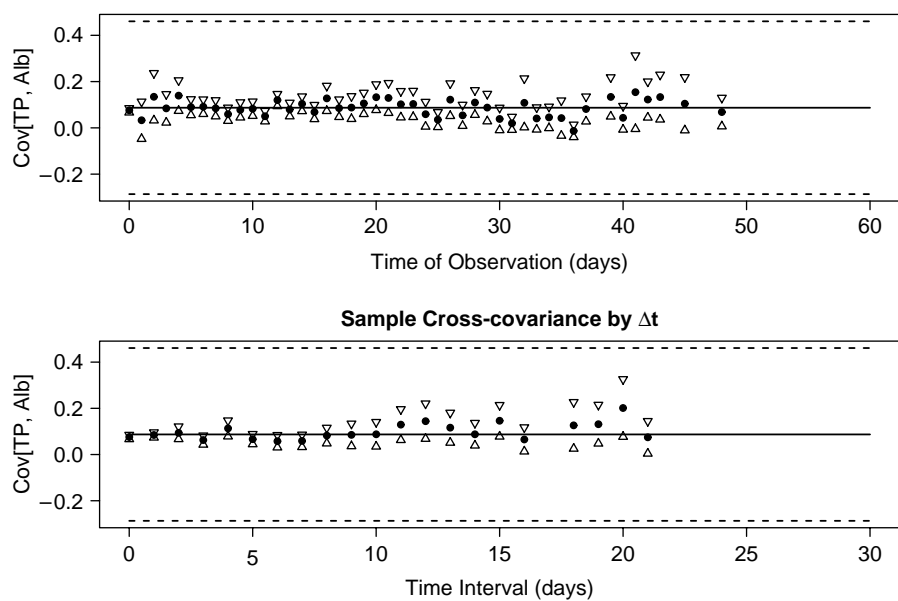

Figure S3.52. TP and Alb Sample Cross-covariance by Day of Observation.

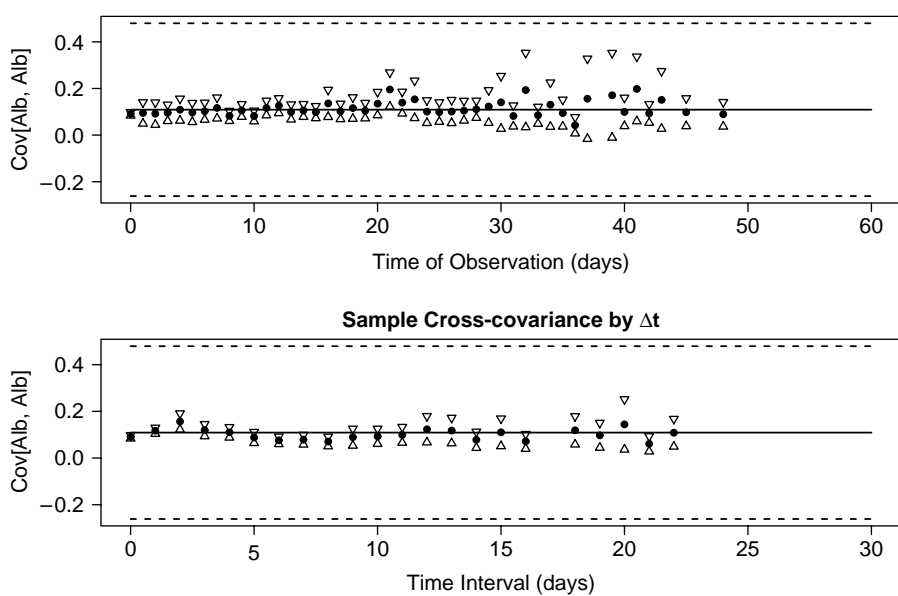

Figure S3.53. Alb and Alb Sample Cross-covariance by Day of Observation.

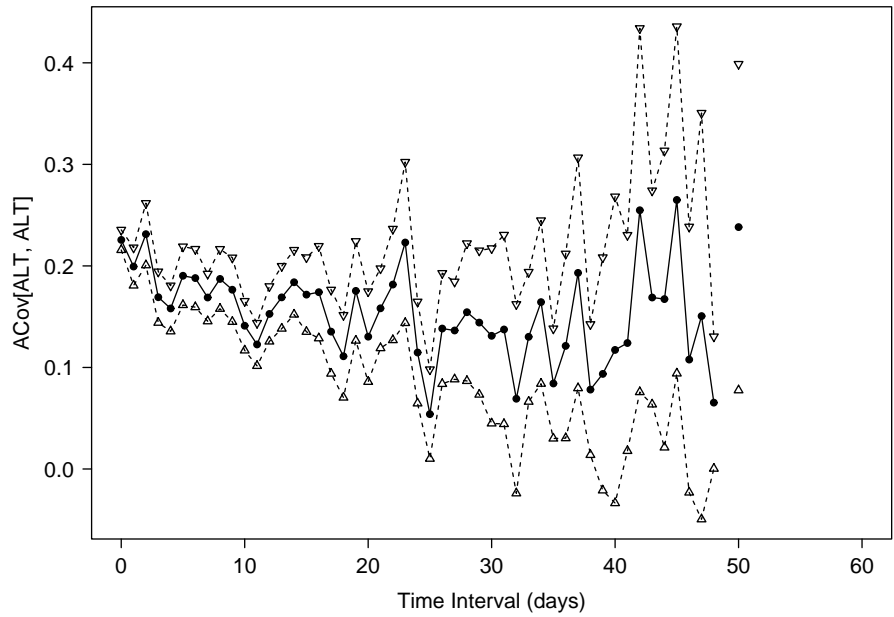

Figure S3.54. ALT and ALT Sample Auto-covariance by Time Interval.

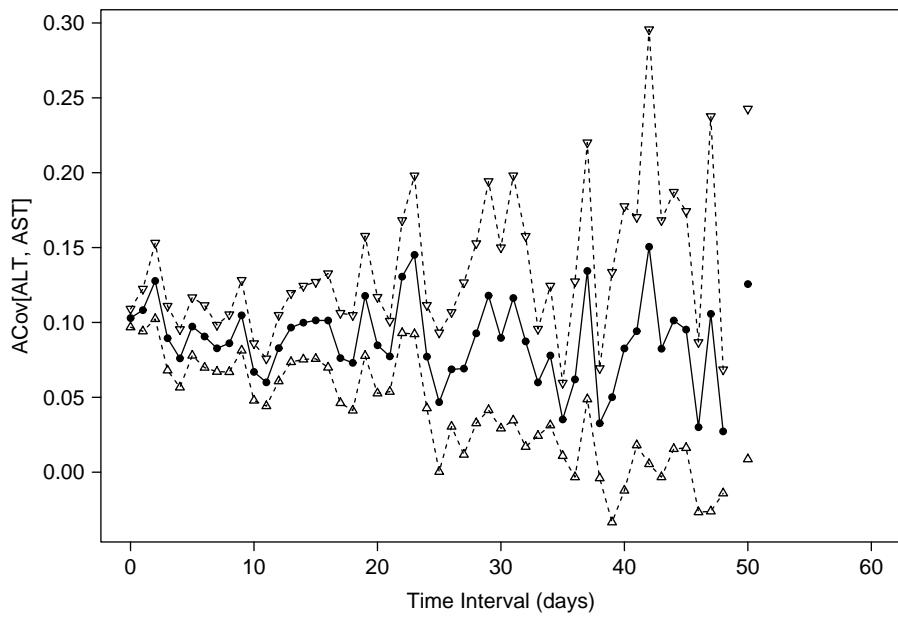

Figure S3.55. ALT and AST Sample Auto-covariance by Time Interval.

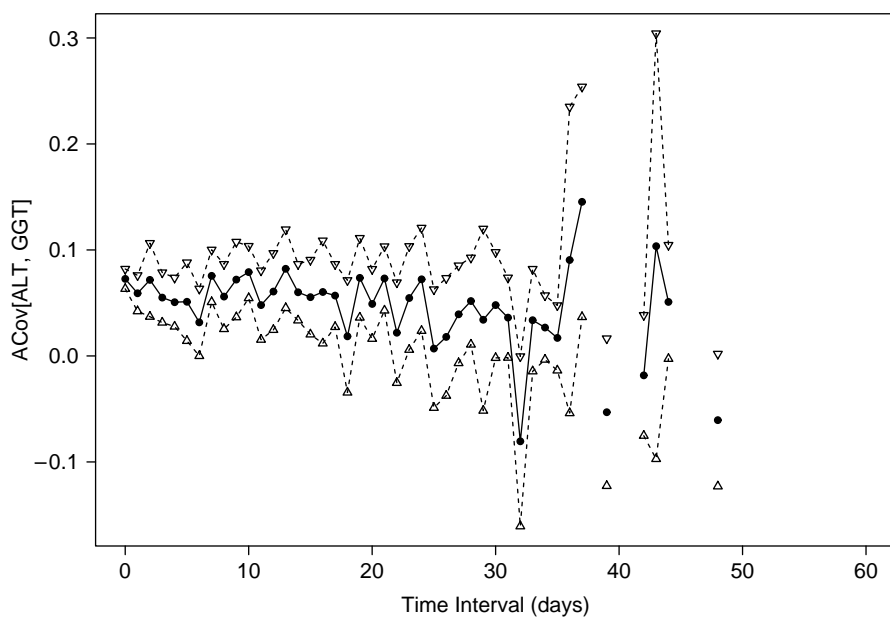

Figure S3.56. ALT and GGT Sample Auto-covariance by Time Interval.

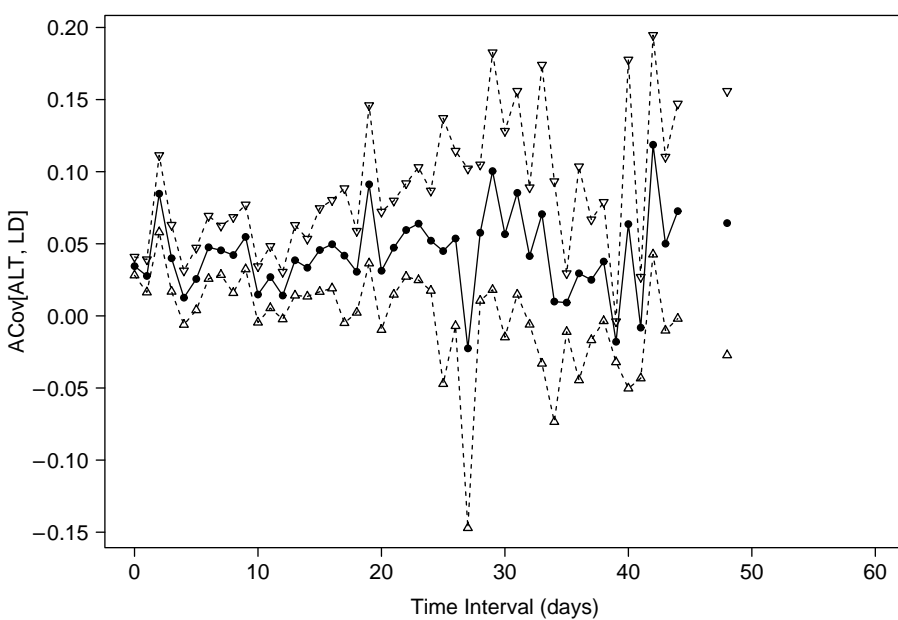

Figure S3.57. ALT and LD Sample Auto-covariance by Time Interval.

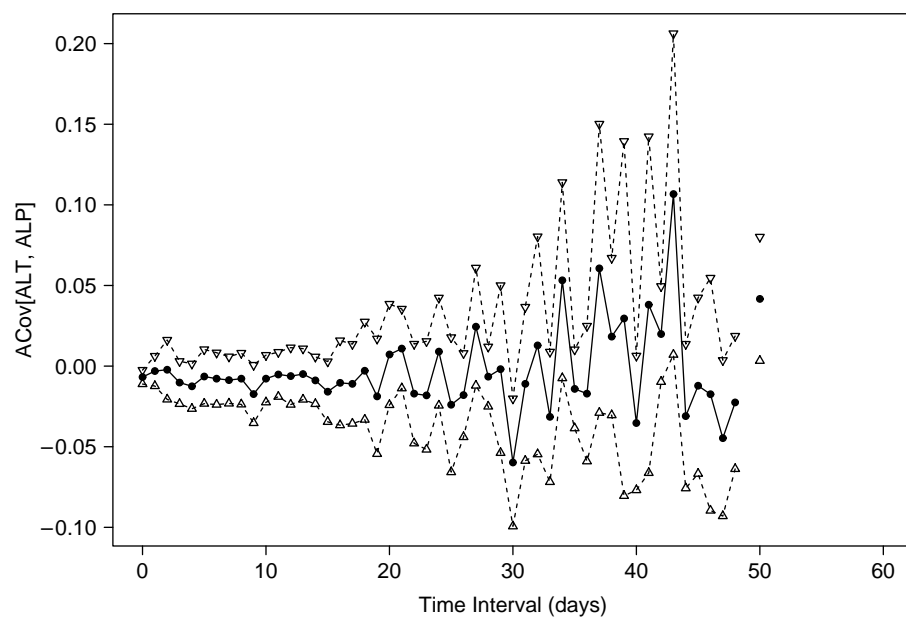

Figure S3.58. ALT and ALP Sample Auto-covariance by Time Interval.

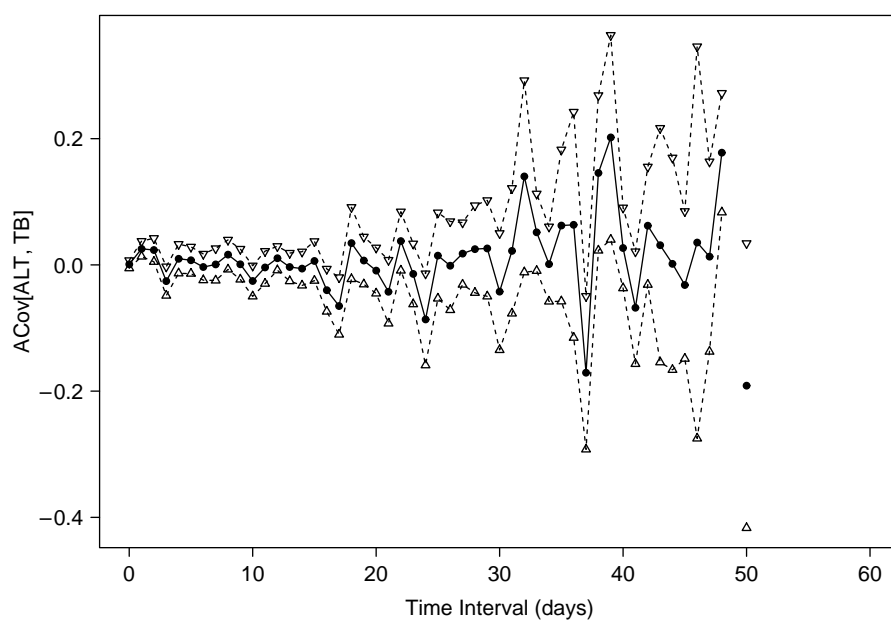

Figure S3.59. ALT and TB Sample Auto-covariance by Time Interval.



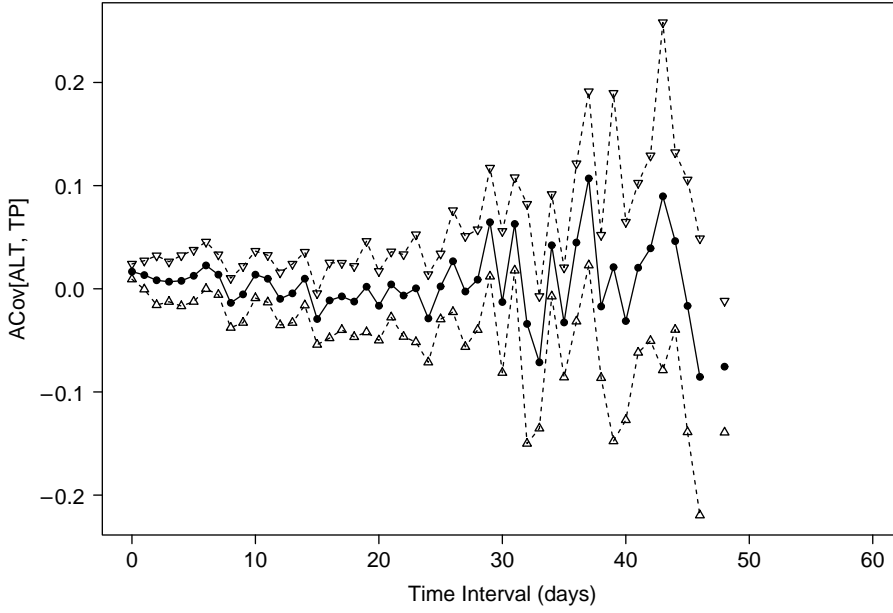

Figure S3.60. ALT and TP Sample Auto-covariance by Time Interval.

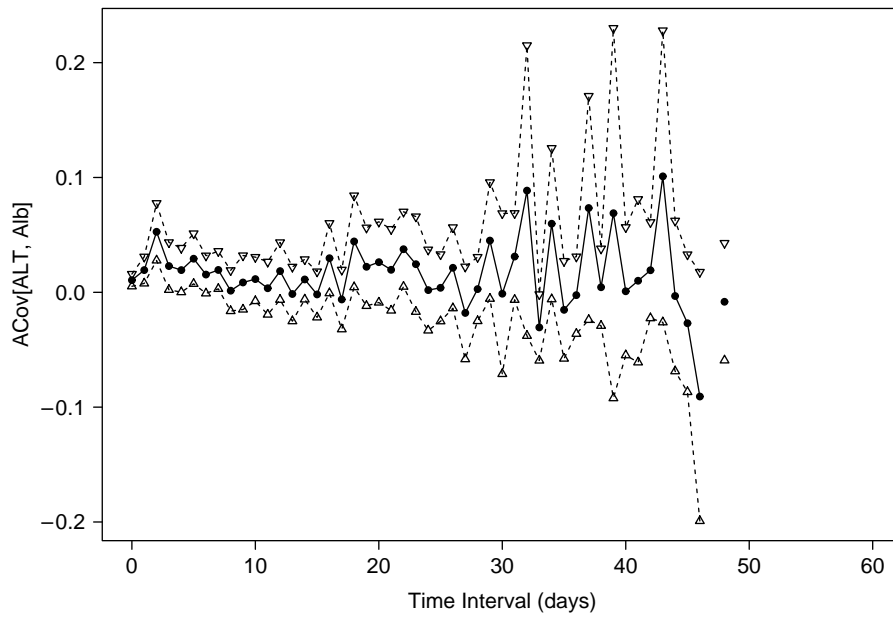

Figure S3.61. ALT and Alb Sample Auto-covariance by Time Interval.

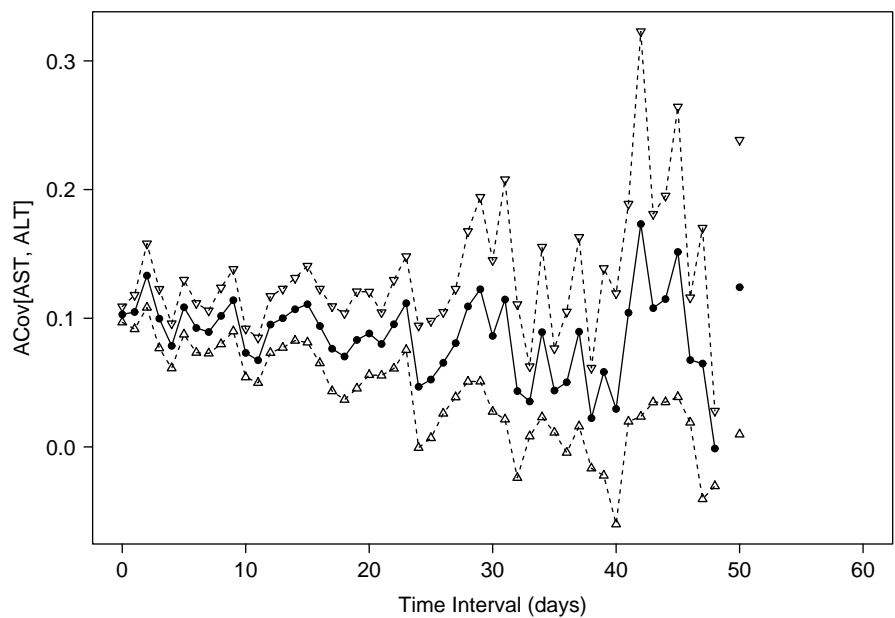

Figure S3.62. AST and ALT Sample Auto-covariance by Time Interval.

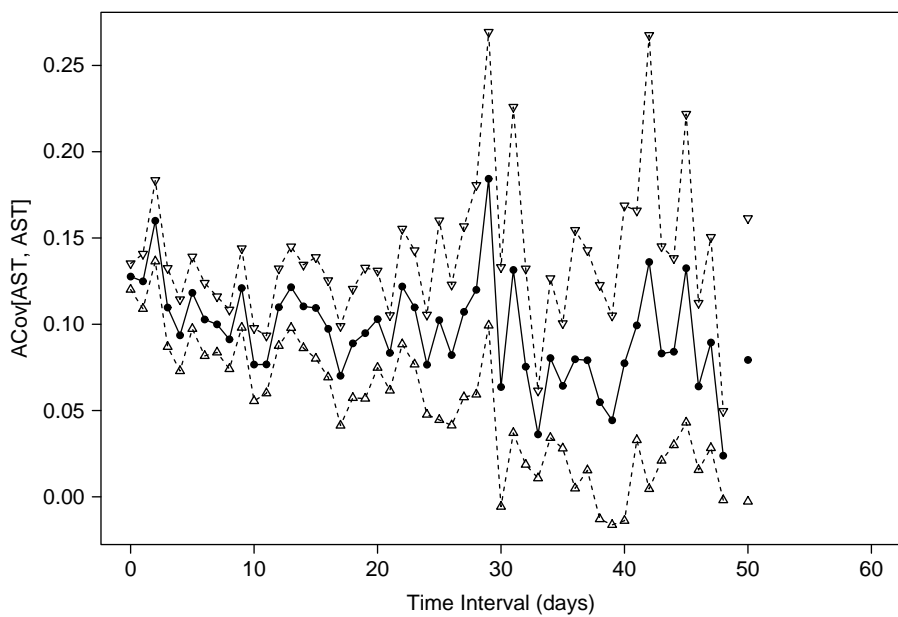

Figure S3.63. AST and AST Sample Auto-covariance by Time Interval.

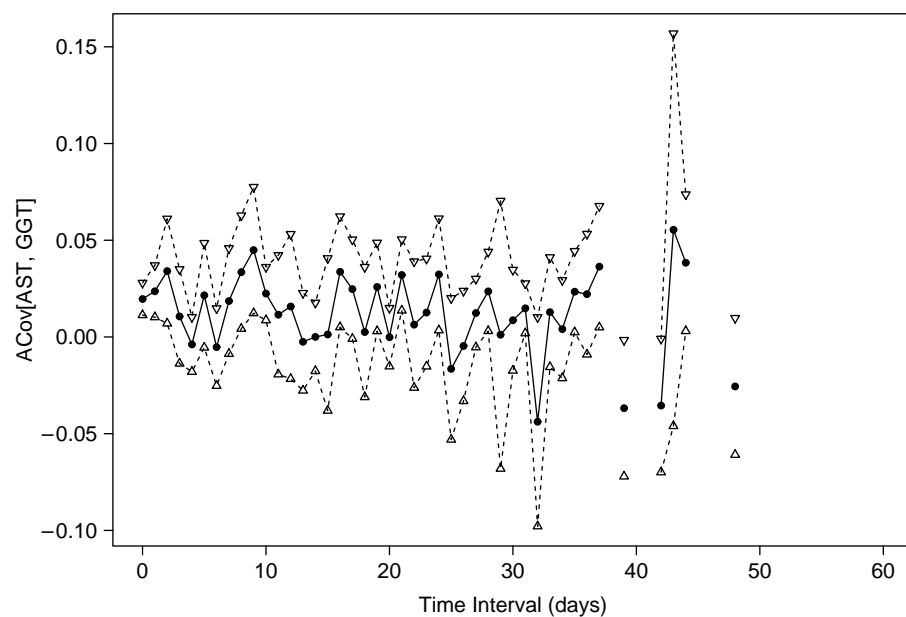

Figure S3.64. AST and GGT Sample Auto-covariance by Time Interval.

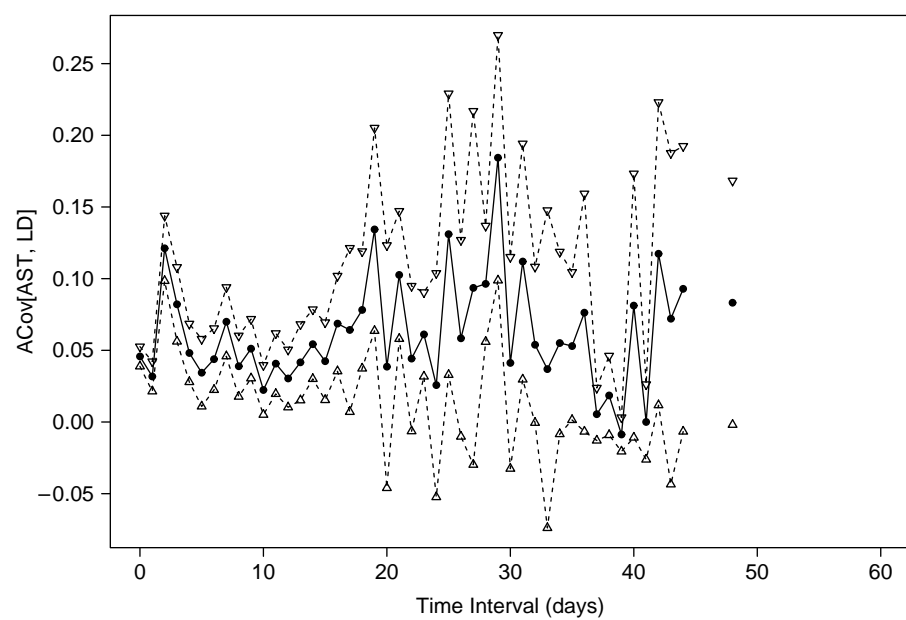

Figure S3.65. AST and LD Sample Auto-covariance by Time Interval.

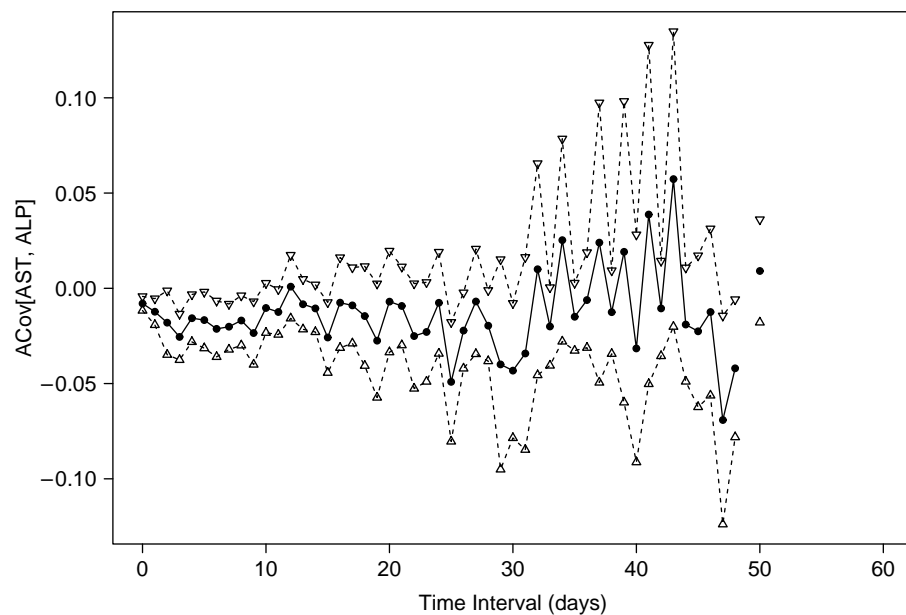

Figure S3.66. AST and ALP Sample Auto-covariance by Time Interval.

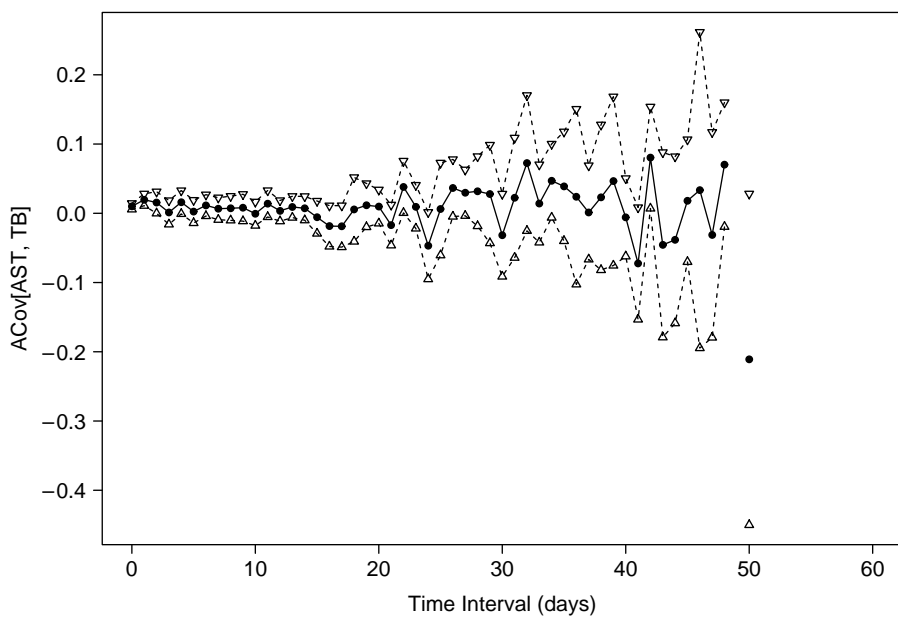

Figure S3.67. AST and TB Sample Auto-covariance by Time Interval.

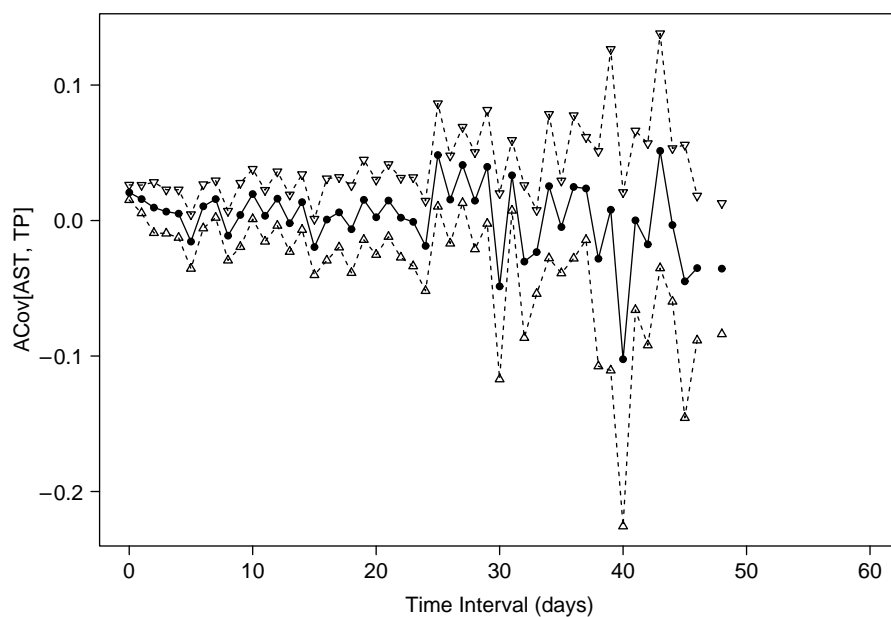

Figure S3.68. AST and TP Sample Auto-covariance by Time Interval.

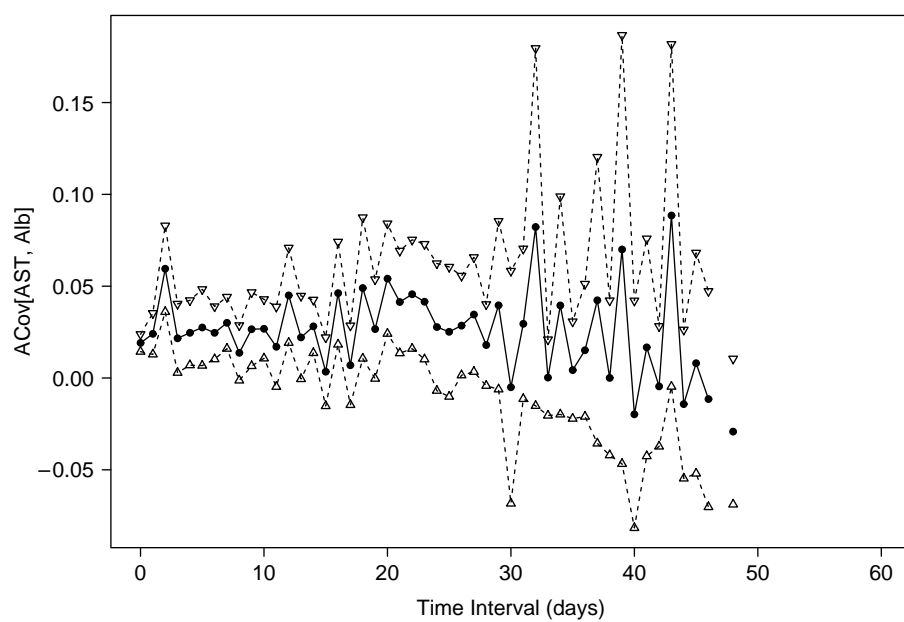

Figure S3.69. AST and Alb Sample Auto-covariance by Time Interval.

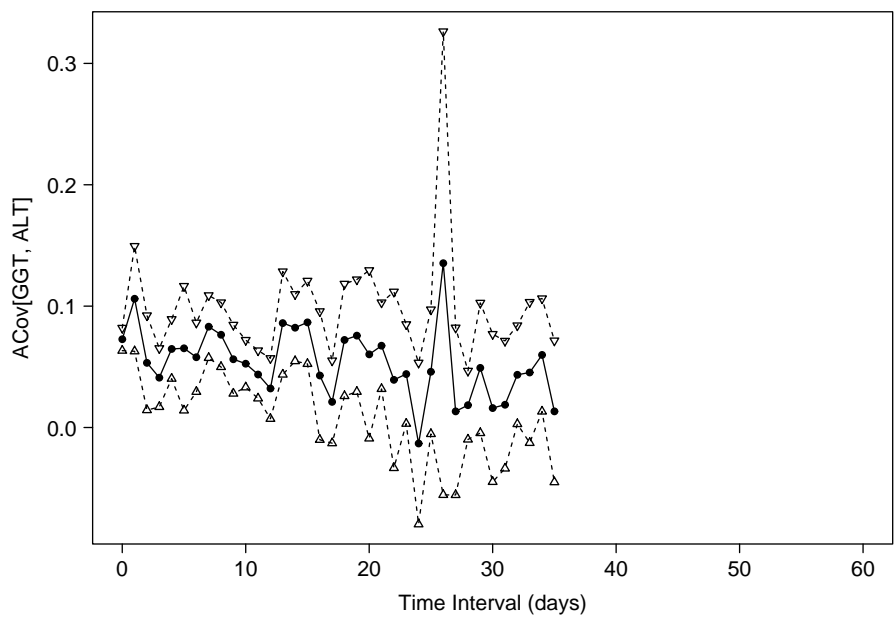

Figure S3.70. GGT and ALT Sample Auto-covariance by Time Interval.

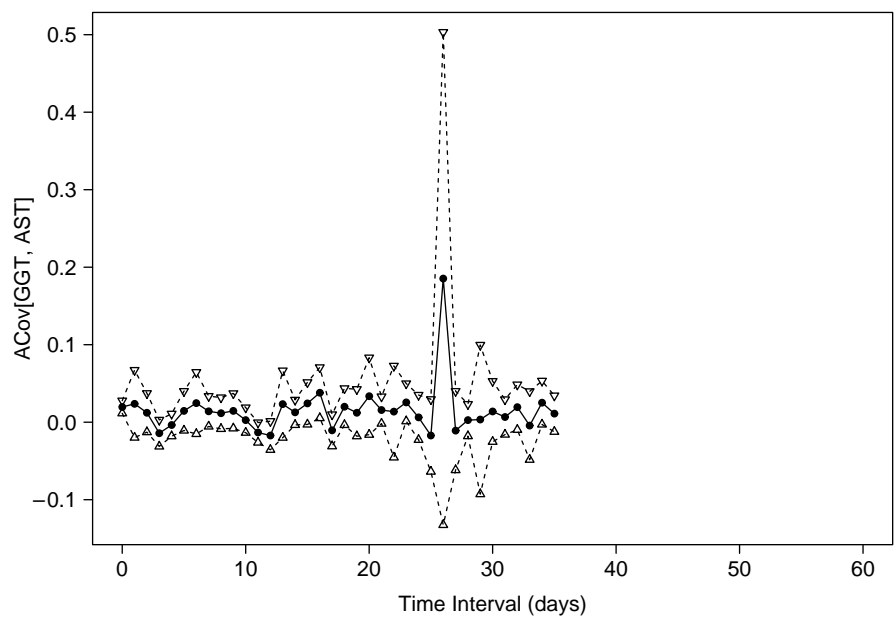

Figure S3.71. GGT and AST Sample Auto-covariance by Time Interval.

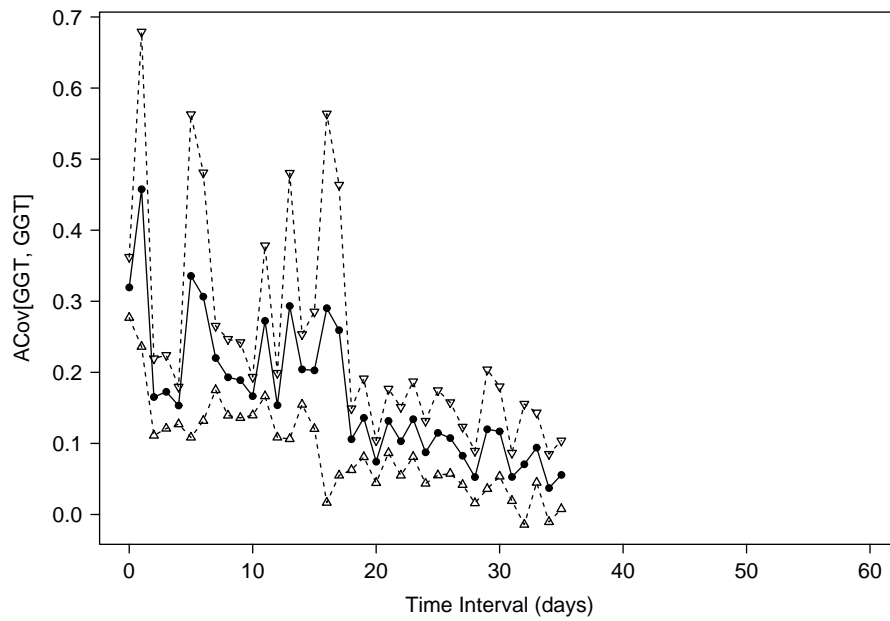

Figure S3.72. GGT and GGT Sample Auto-covariance by Time Interval.

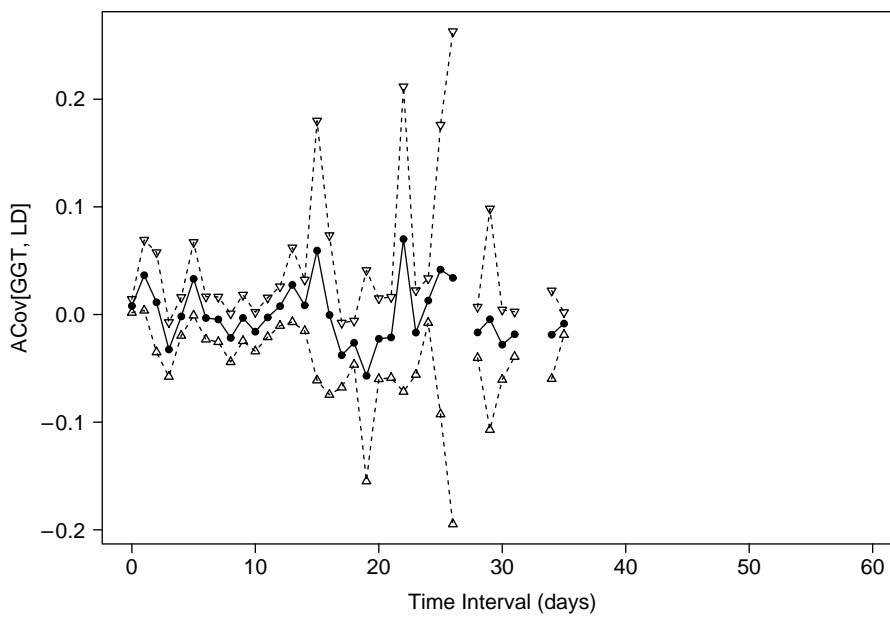

Figure S3.73. GGT and LD Sample Auto-covariance by Time Interval.

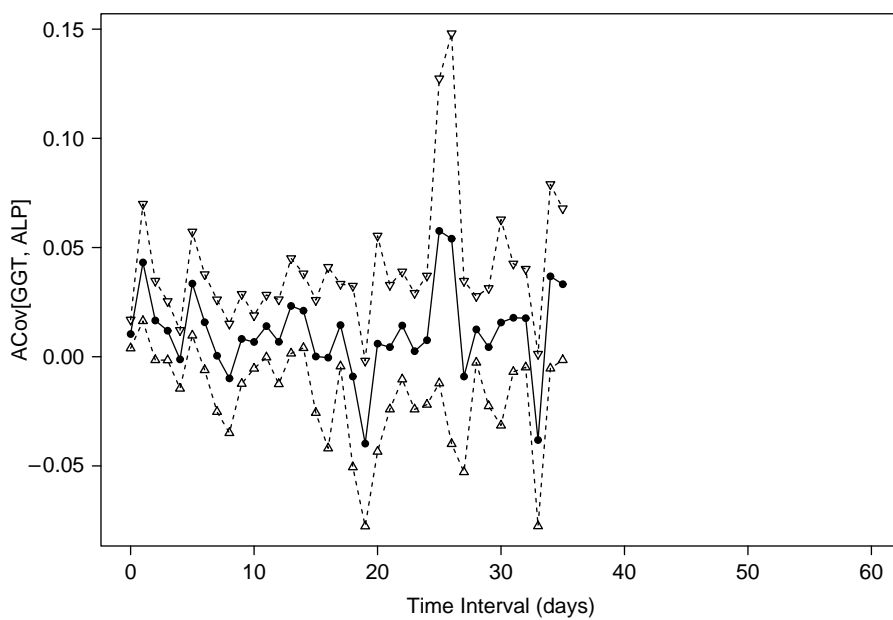

Figure S3.74. GGT and ALP Sample Auto-covariance by Time Interval.

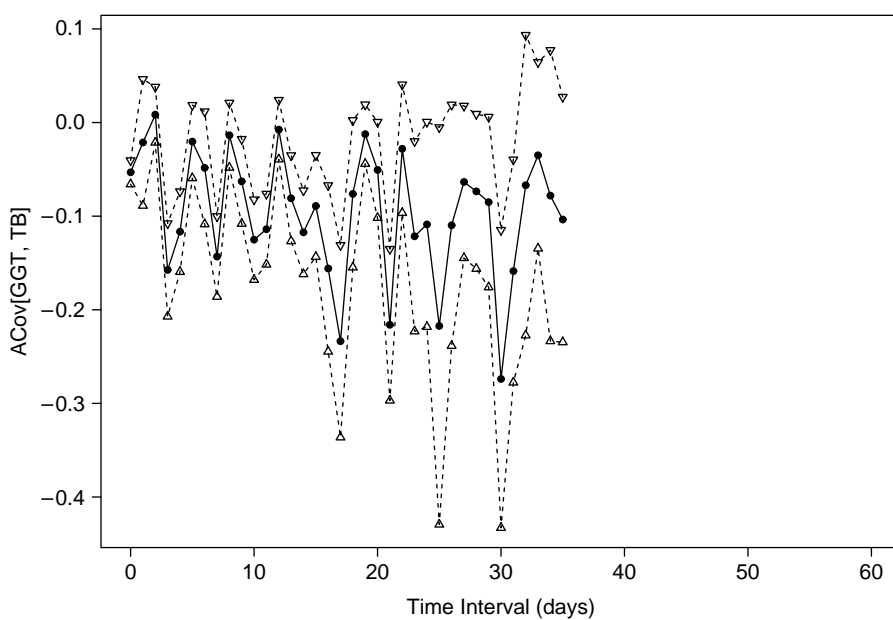

Figure S3.75. GGT and TB Sample Auto-covariance by Time Interval.



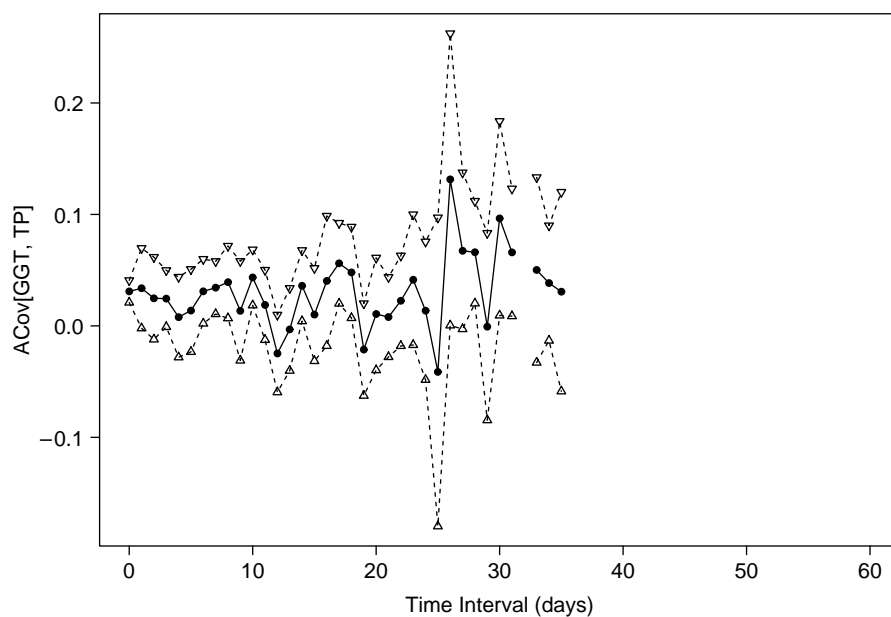

Figure S3.76. GGT and TP Sample Auto-covariance by Time Interval.

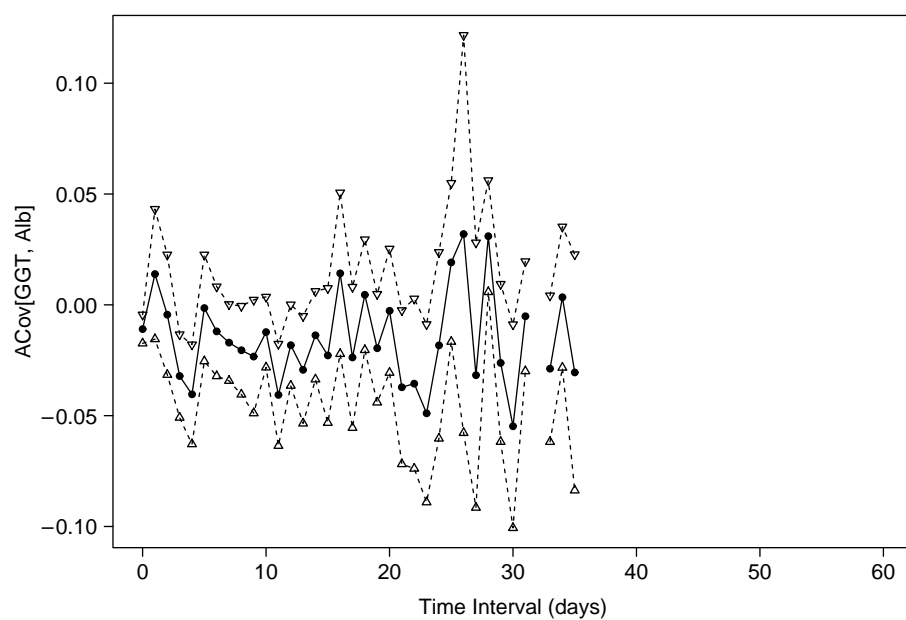

Figure S3.77. GGT and Alb Sample Auto-covariance by Time Interval.

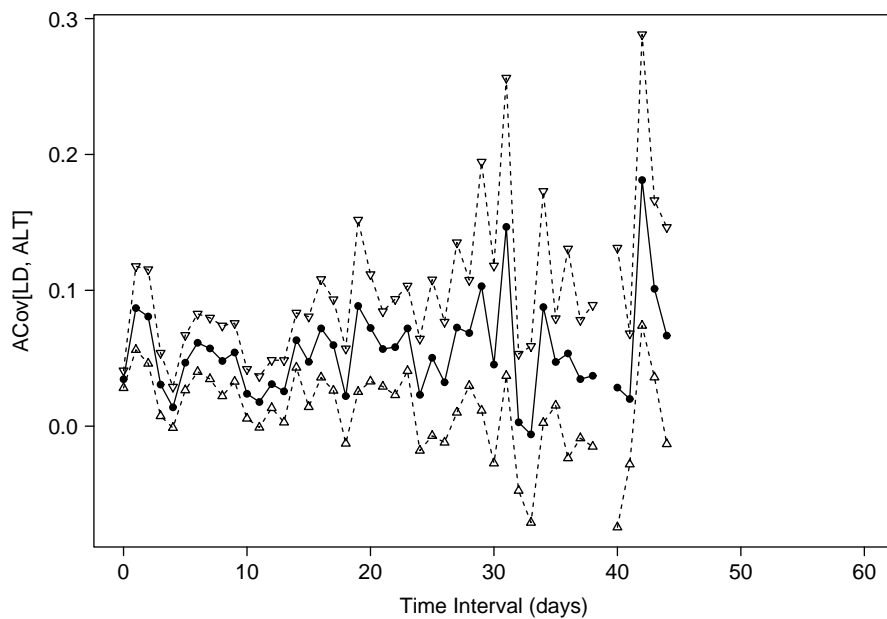

Figure S3.78. LD and ALT Sample Auto-covariance by Time Interval.

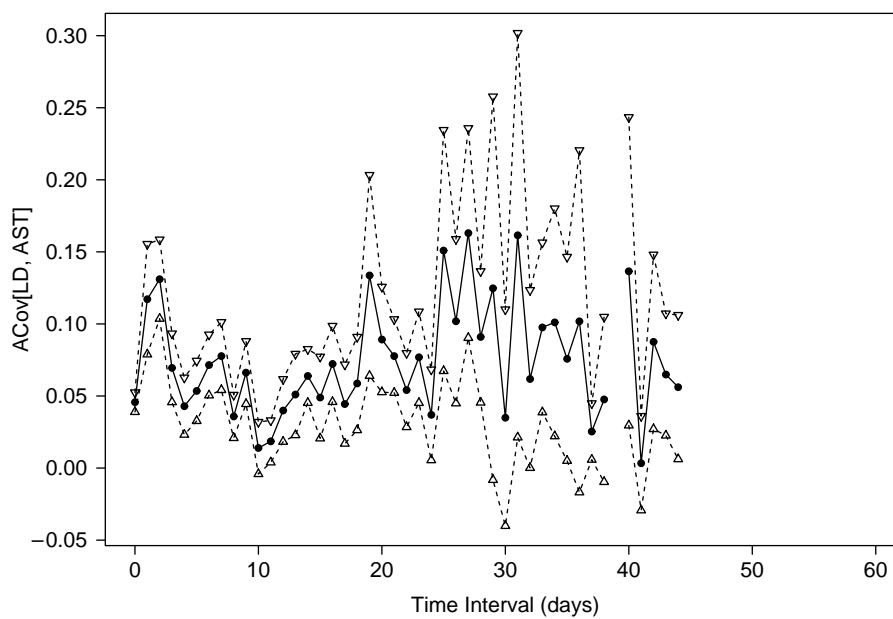

Figure S3.79. LD and AST Sample Auto-covariance by Time Interval.

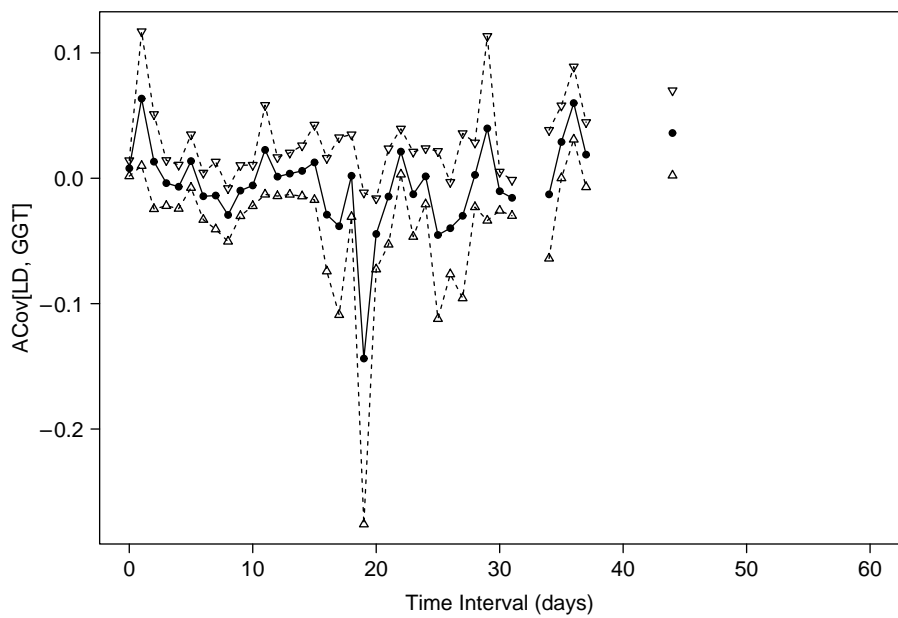

Figure S3.80. LD and GGT Sample Auto-covariance by Time Interval.

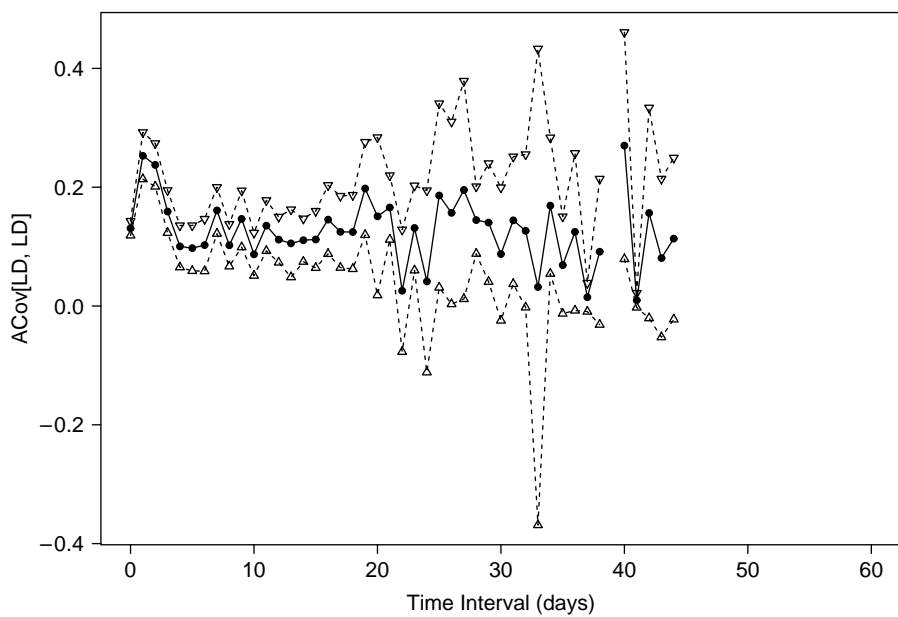

Figure S3.81. LD and LD Sample Auto-covariance by Time Interval.

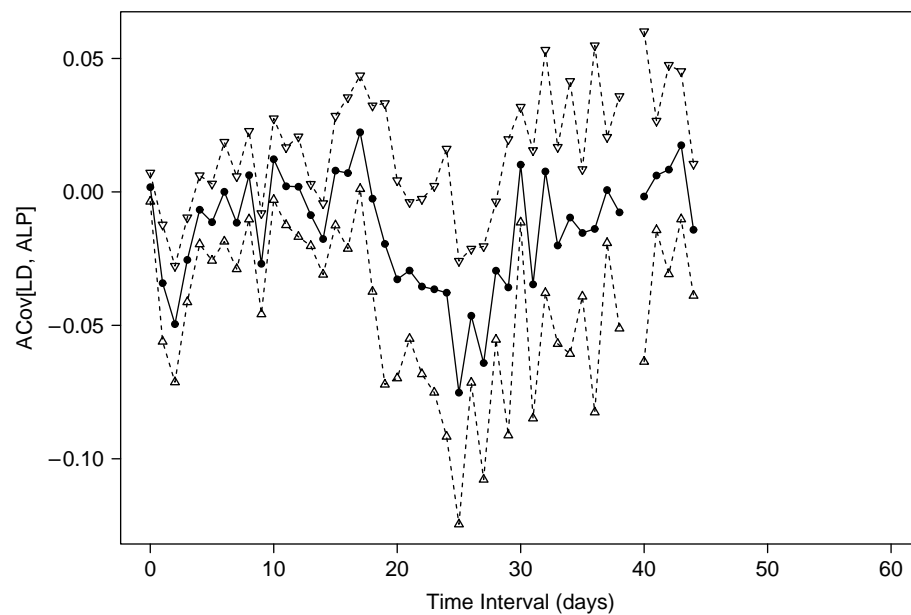

Figure S3.82. LD and ALP Sample Auto-covariance by Time Interval.

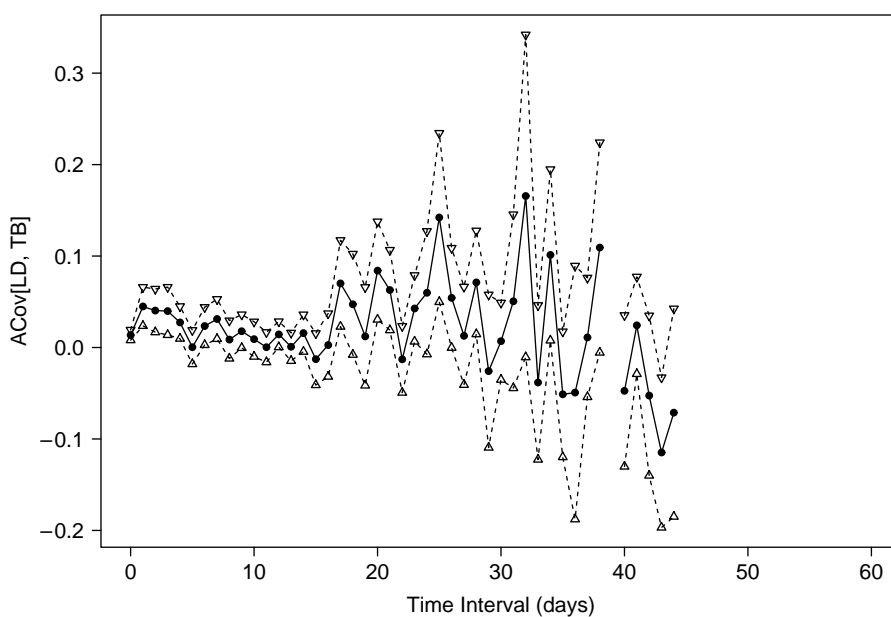

Figure S3.83. LD and TB Sample Auto-covariance by Time Interval.

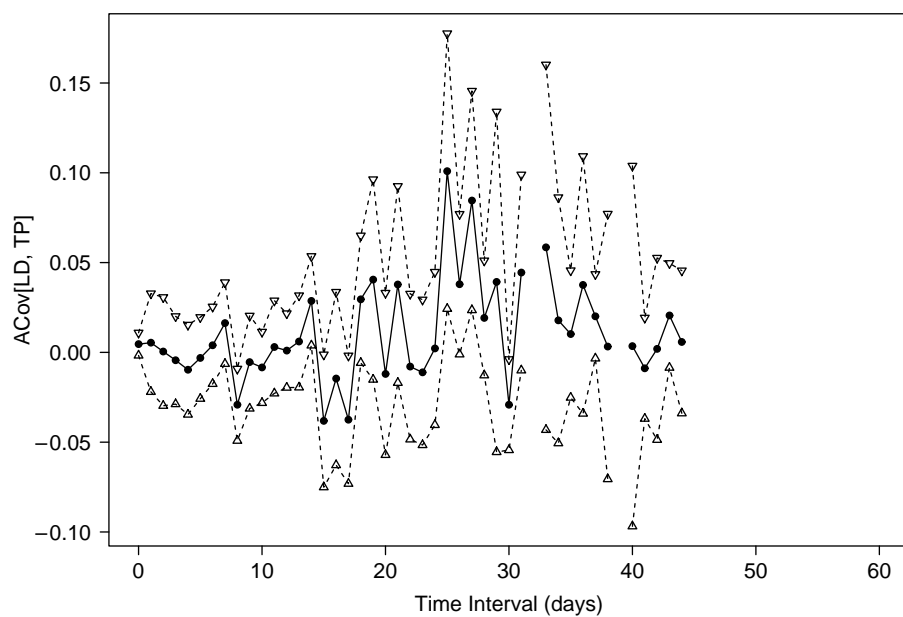

Figure S3.84. LD and TP Sample Auto-covariance by Time Interval.

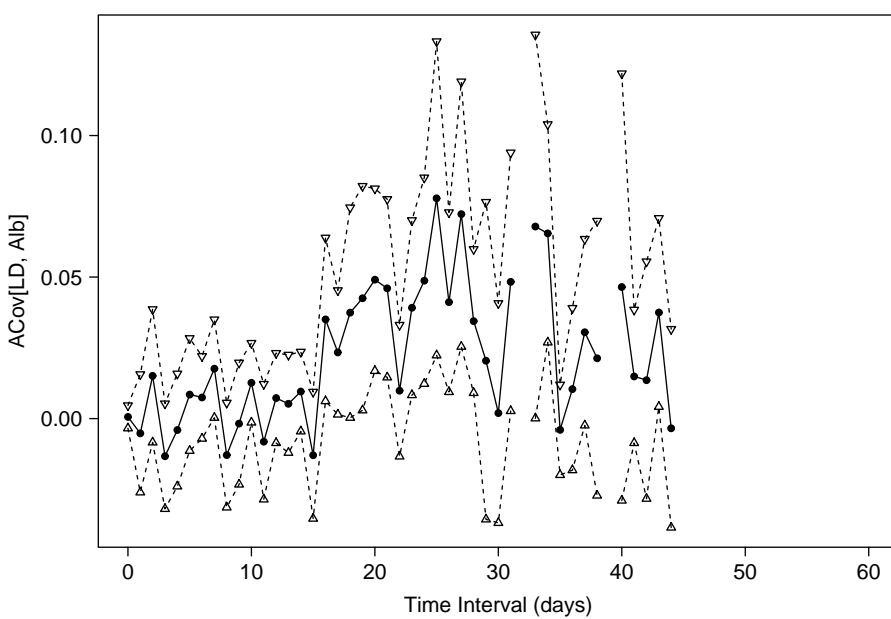

Figure S3.85. LD and Alb Sample Auto-covariance by Time Interval.

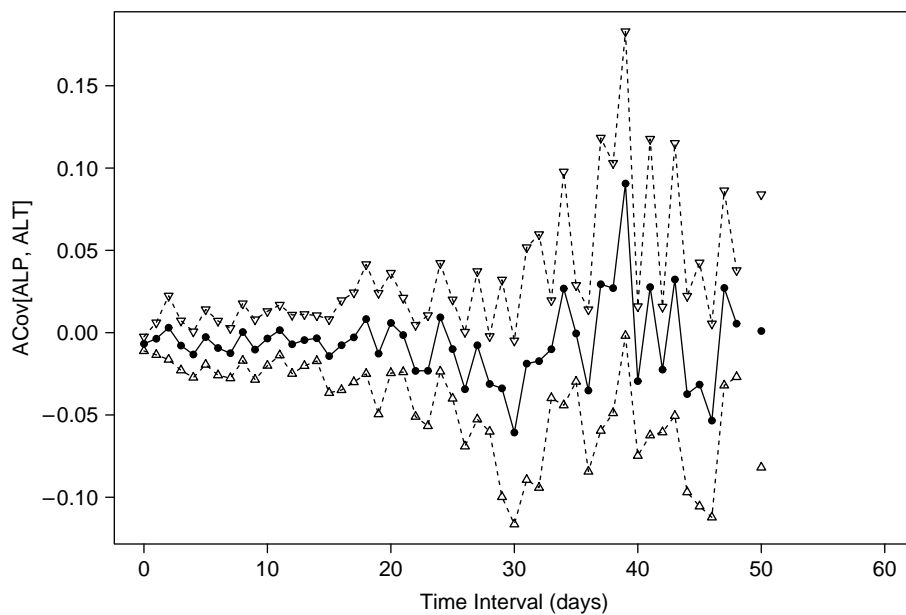

Figure S3.86. ALP and ALT Sample Auto-covariance by Time Interval.

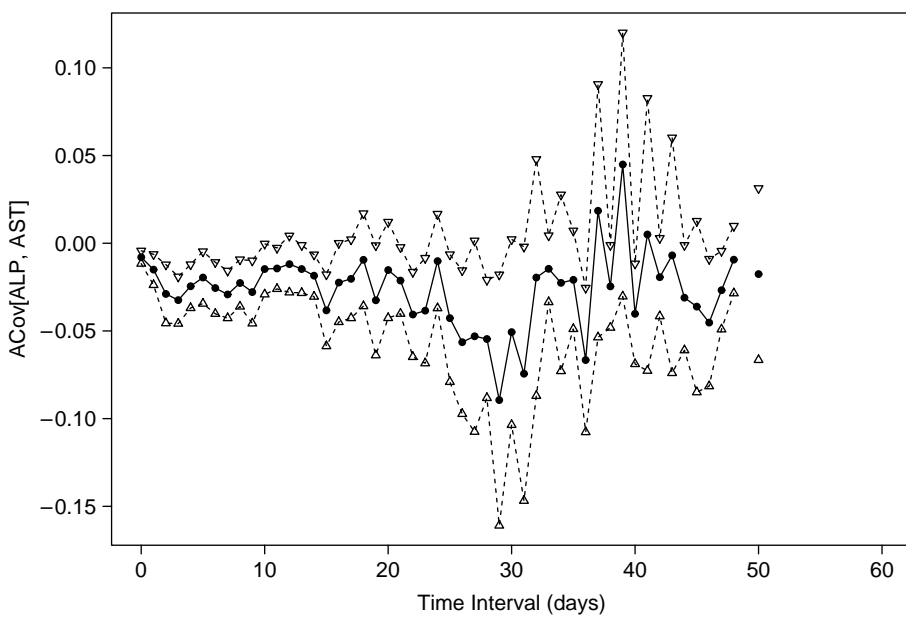

Figure S3.87. ALP and AST Sample Auto-covariance by Time Interval.

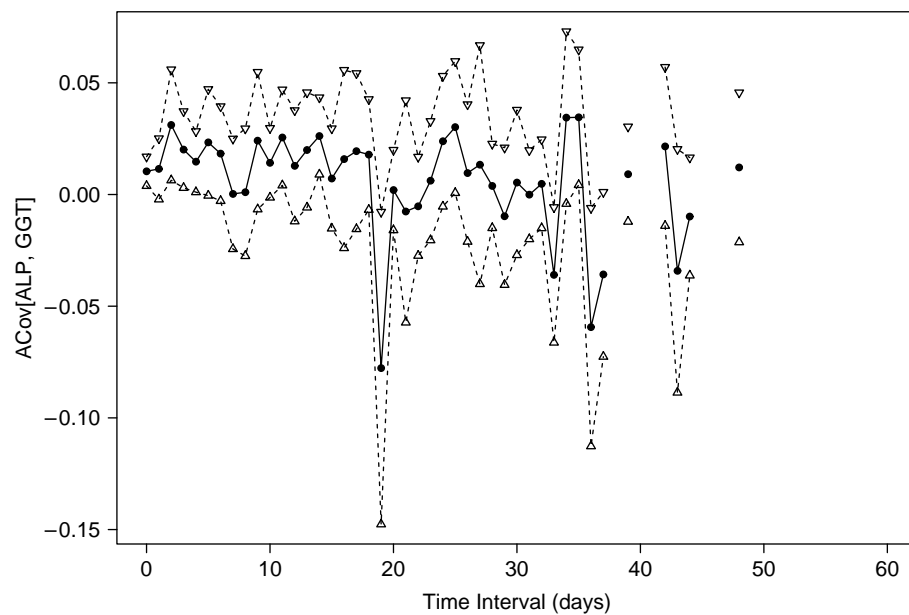

Figure S3.88. ALP and GGT Sample Auto-covariance by Time Interval.

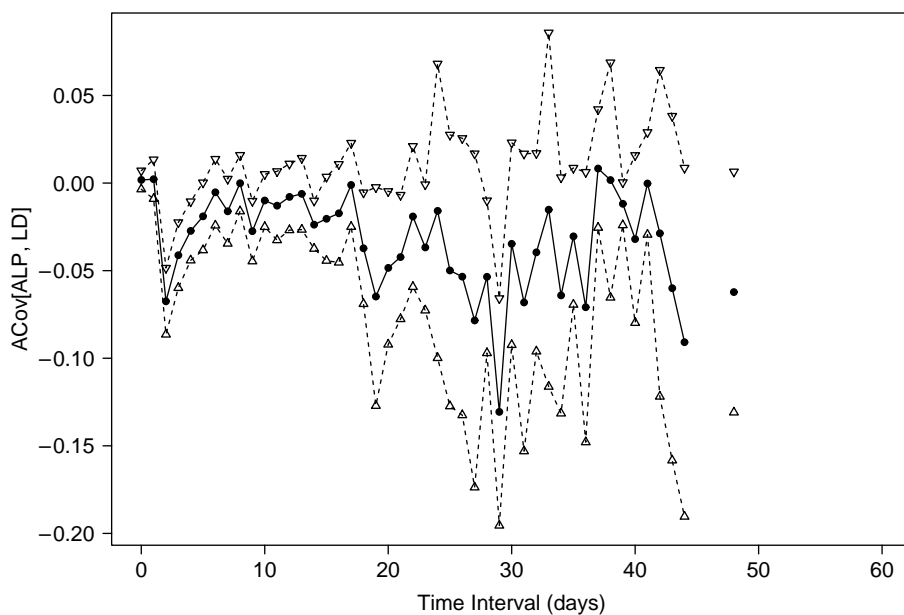

Figure S3.89. ALP and LD Sample Auto-covariance by Time Interval.

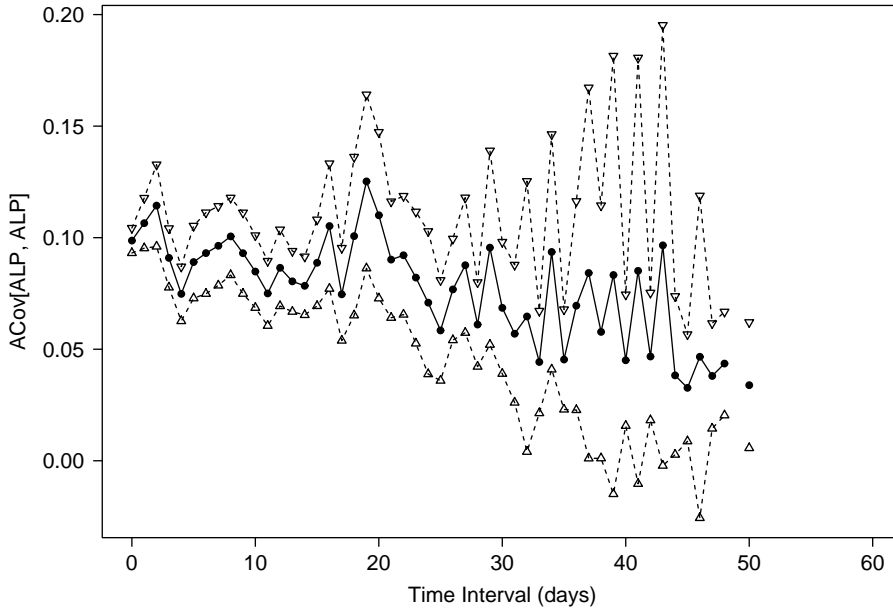

Figure S3.90. ALP and ALP Sample Auto-covariance by Time Interval.

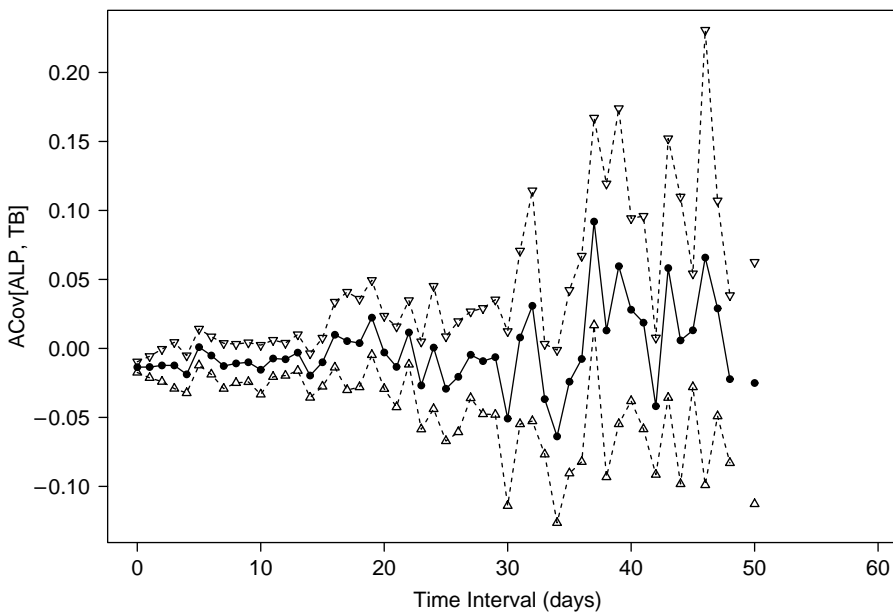

Figure S3.91. ALP and TB Sample Auto-covariance by Time Interval.



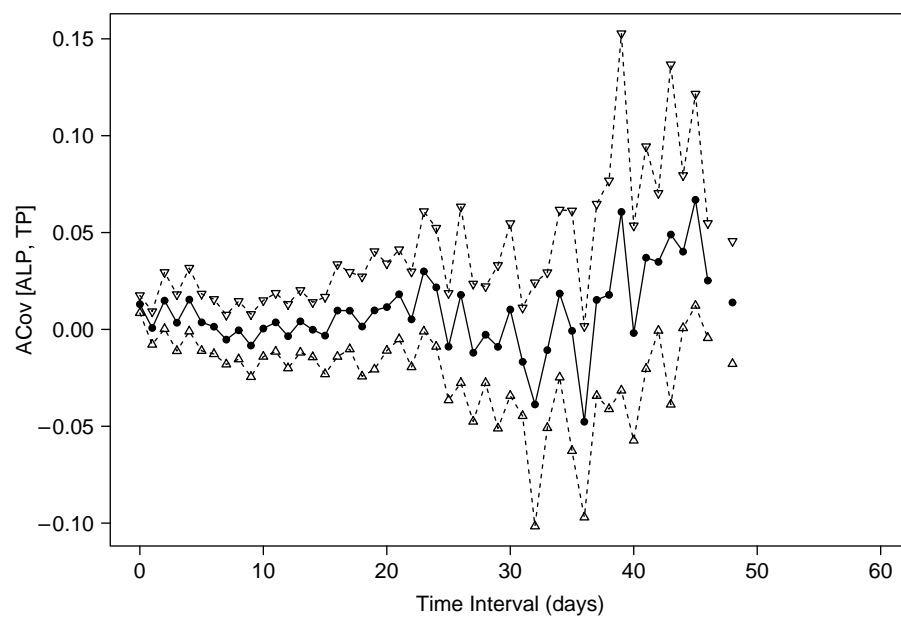

Figure S3.92. ALP and TP Sample Auto-covariance by Time Interval.

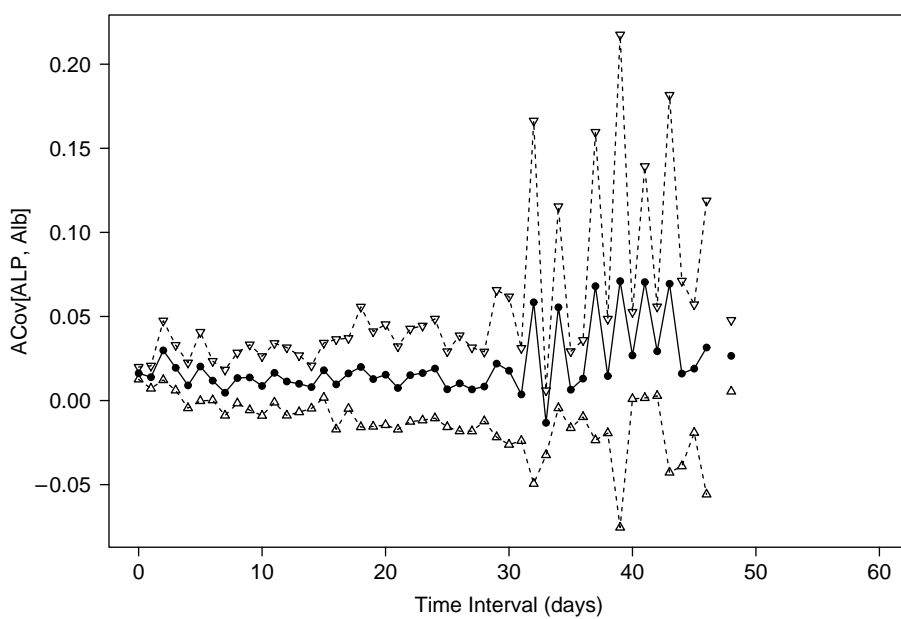

Figure S3.93. ALP and Alb Sample Auto-covariance by Time Interval.

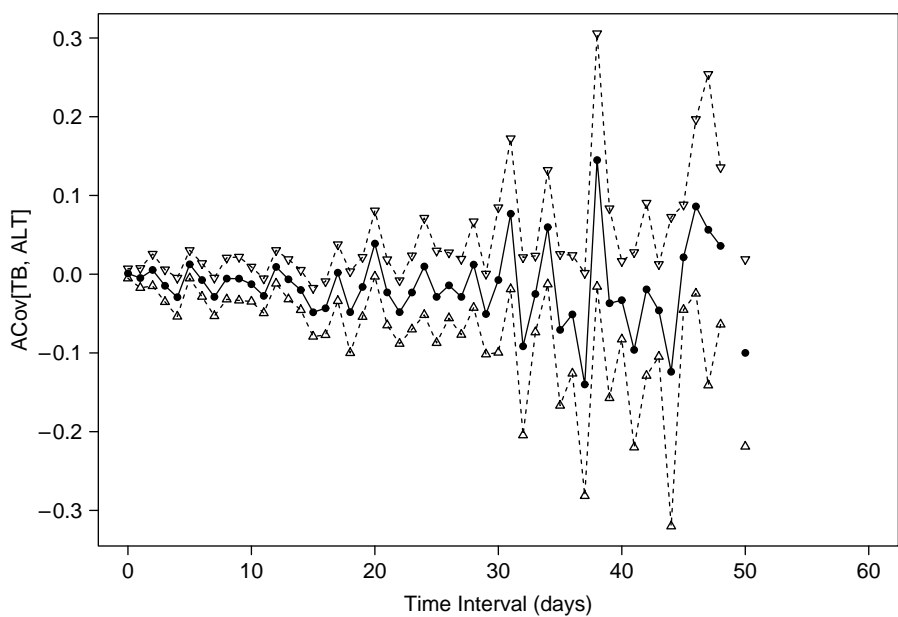

Figure S3.94. TB and ALT Sample Auto-covariance by Time Interval.

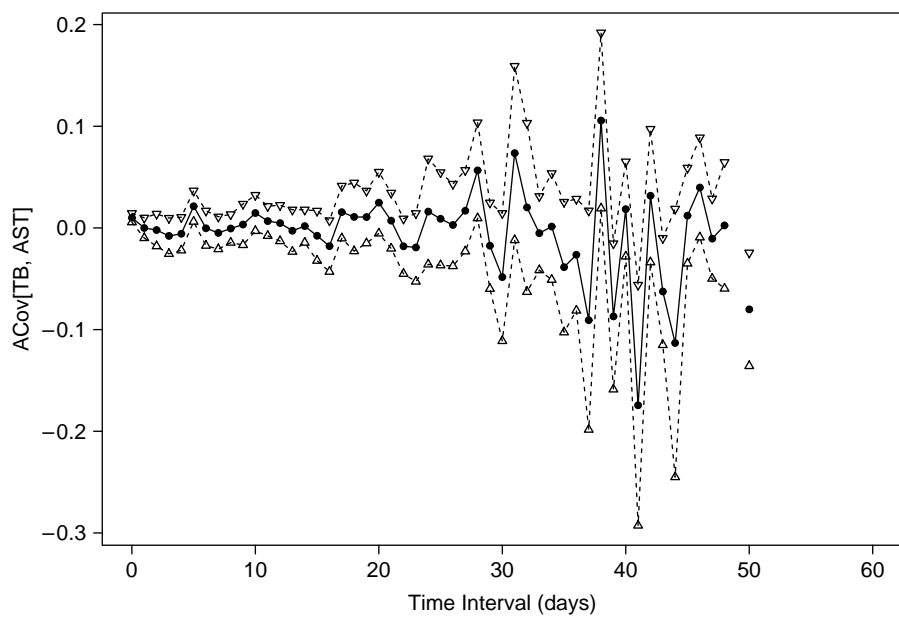

Figure S3.95. TB and AST Sample Auto-covariance by Time Interval.

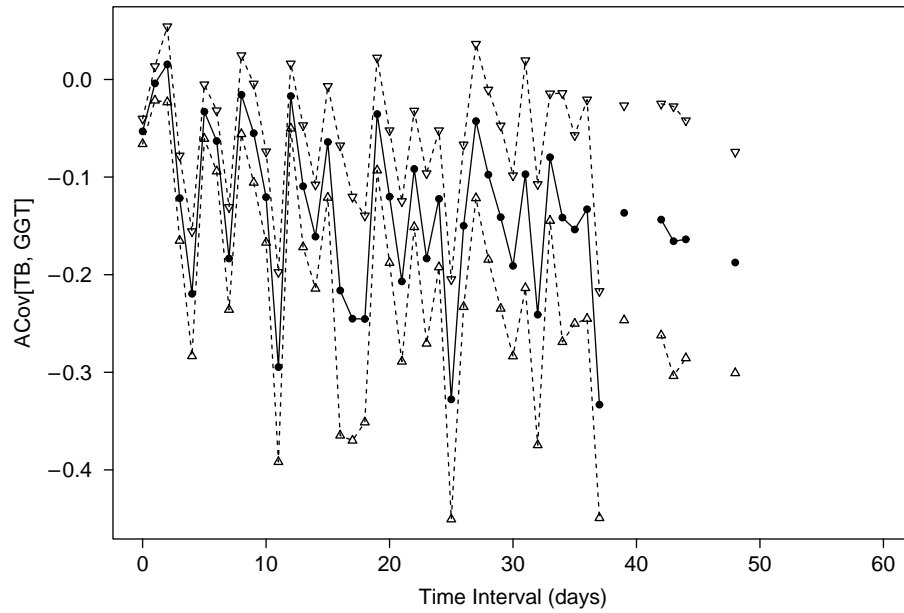

Figure S3.96. TB and GGT Sample Auto-covariance by Time Interval.

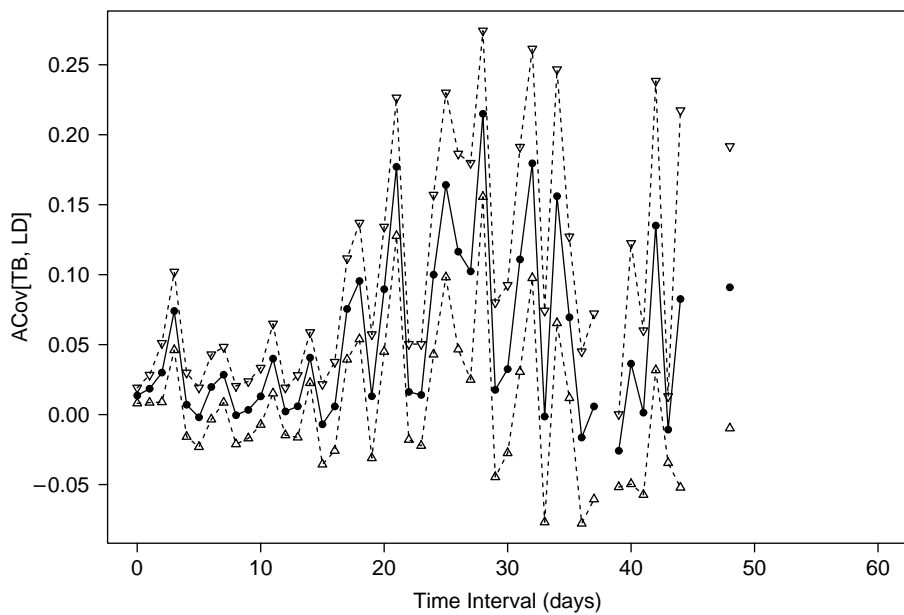

Figure S3.97. TB and LD Sample Auto-covariance by Time Interval.

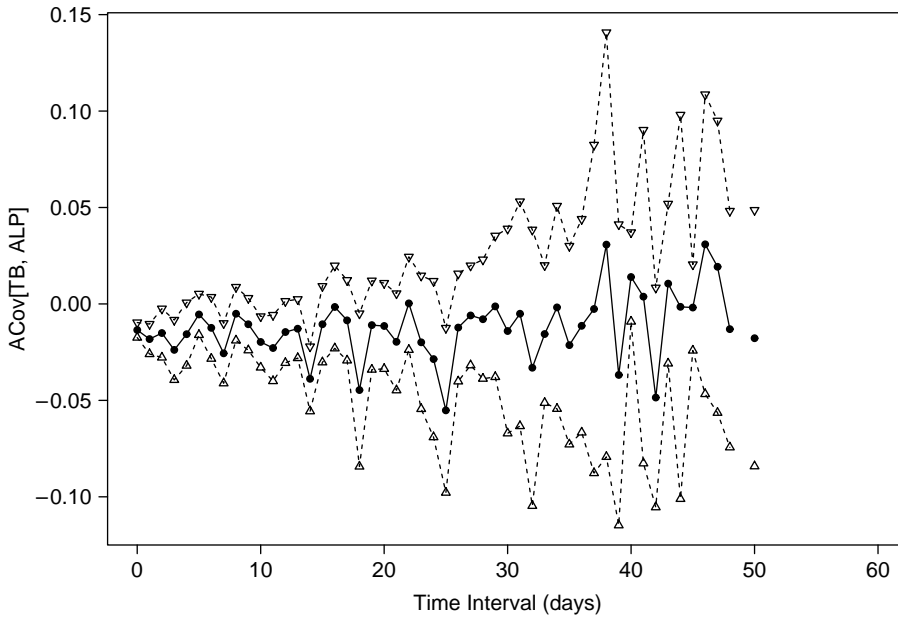

Figure S3.98. TB and ALP Sample Auto-covariance by Time Interval.

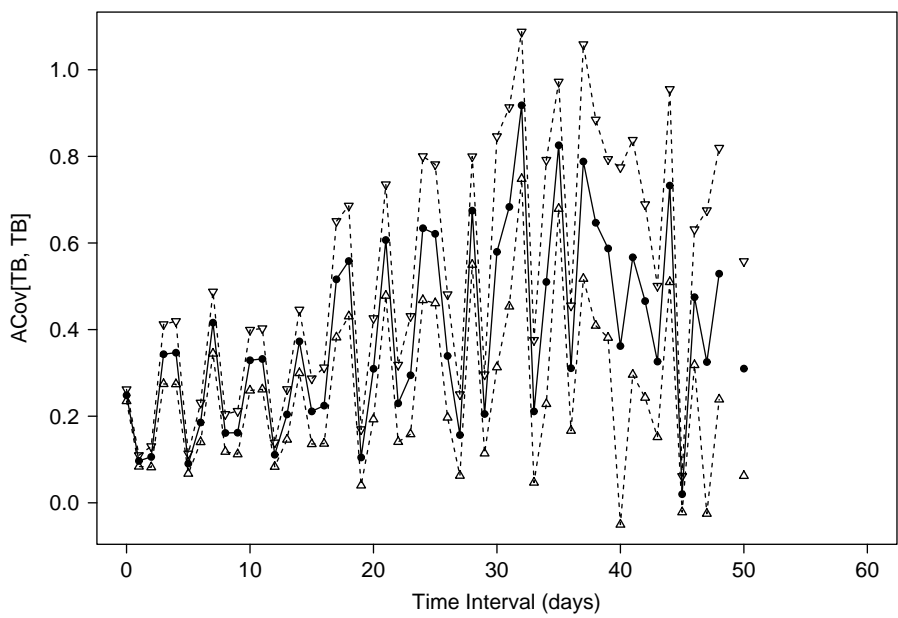

Figure S3.99. TB and TB Sample Auto-covariance by Time Interval.

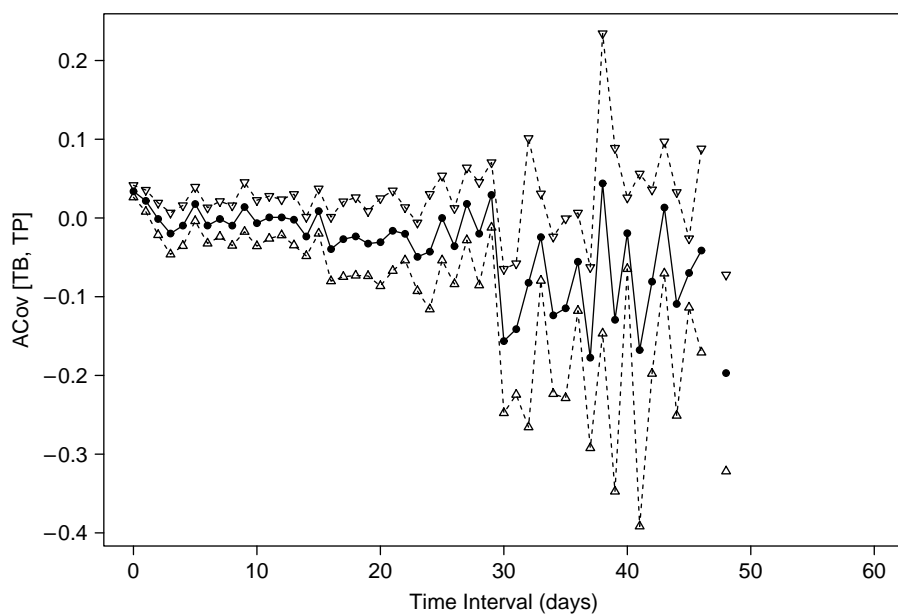

Figure S3.100. TB and TP Sample Auto-covariance by Time Interval.

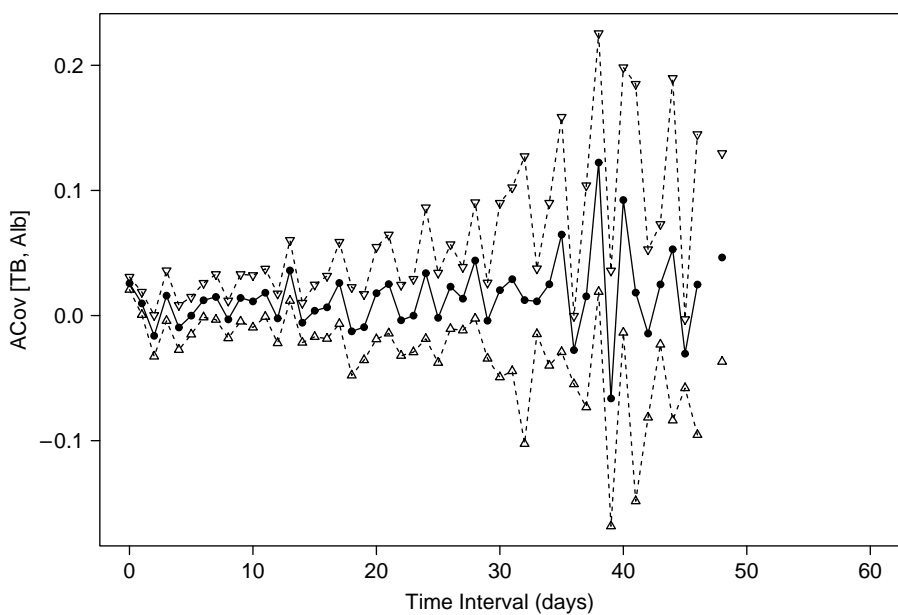

Figure S3.101. TB and Alb Sample Auto-covariance by Time Interval.

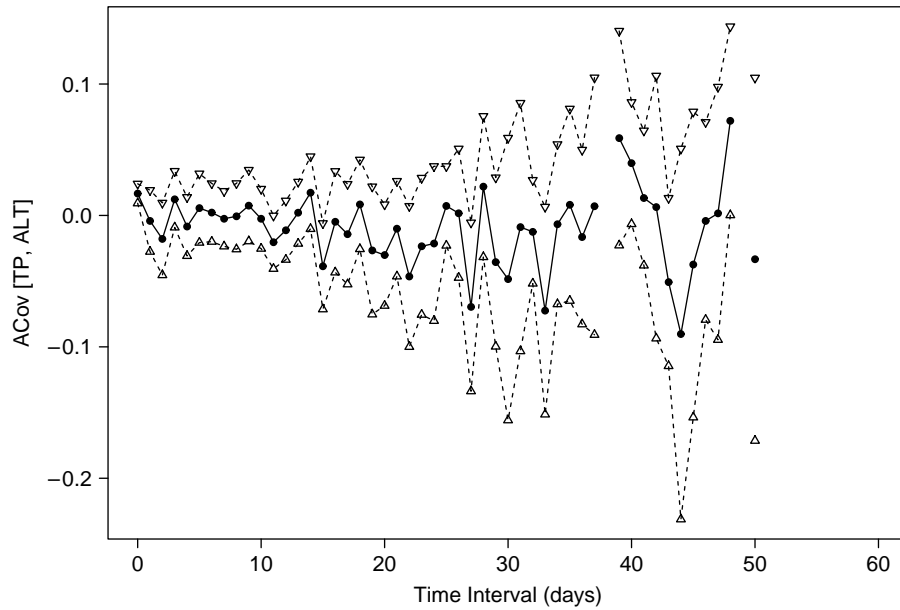

Figure S3.102. TP and ALT Sample Auto-covariance by Time Interval.

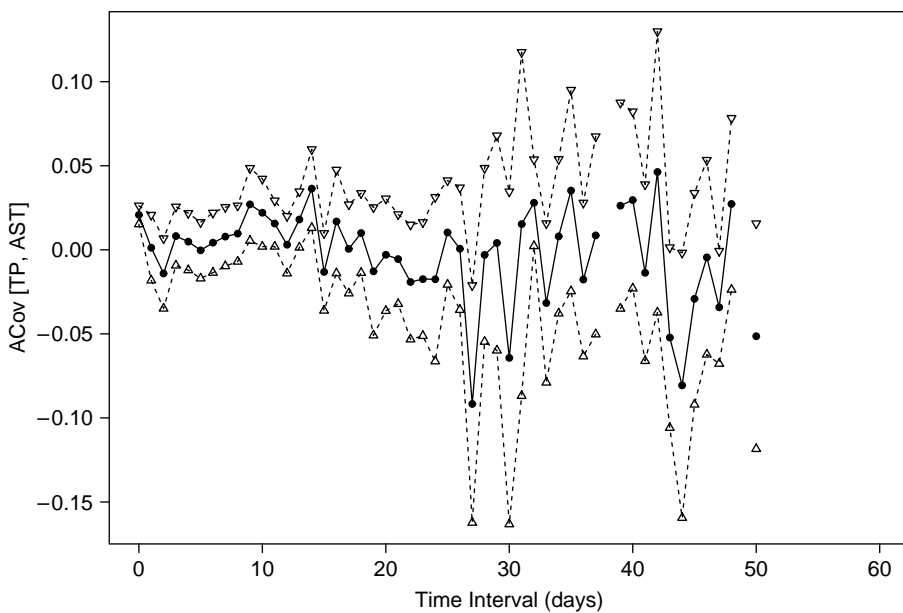

Figure S3.103. TP and AST Sample Auto-covariance by Time Interval.

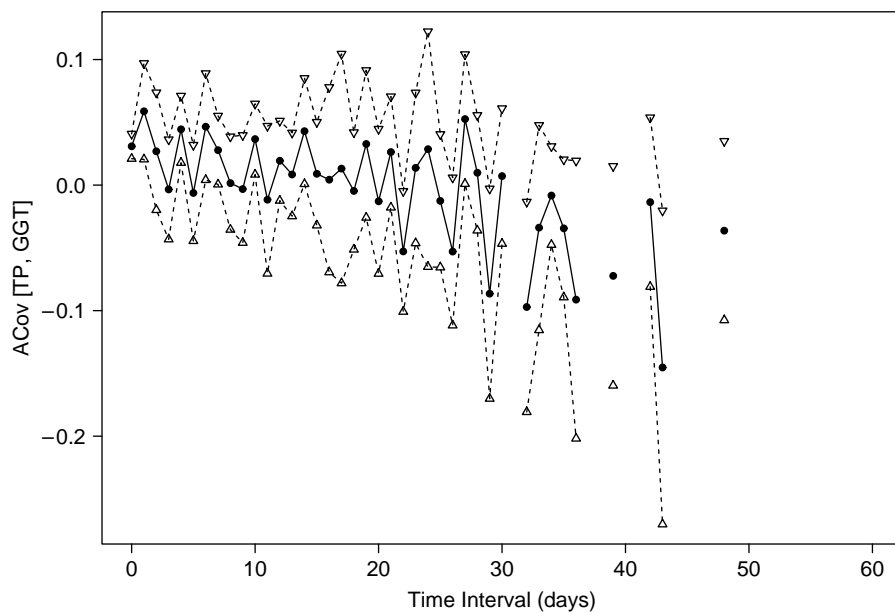

Figure S3.104. TP and GGT Sample Auto-covariance by Time Interval.

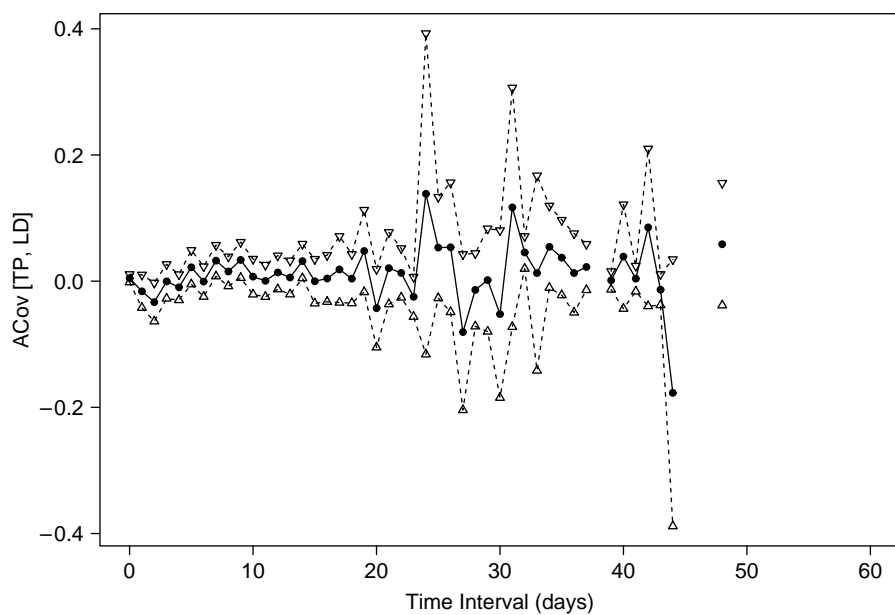

Figure S3.105. TP and LD Sample Auto-covariance by Time Interval.

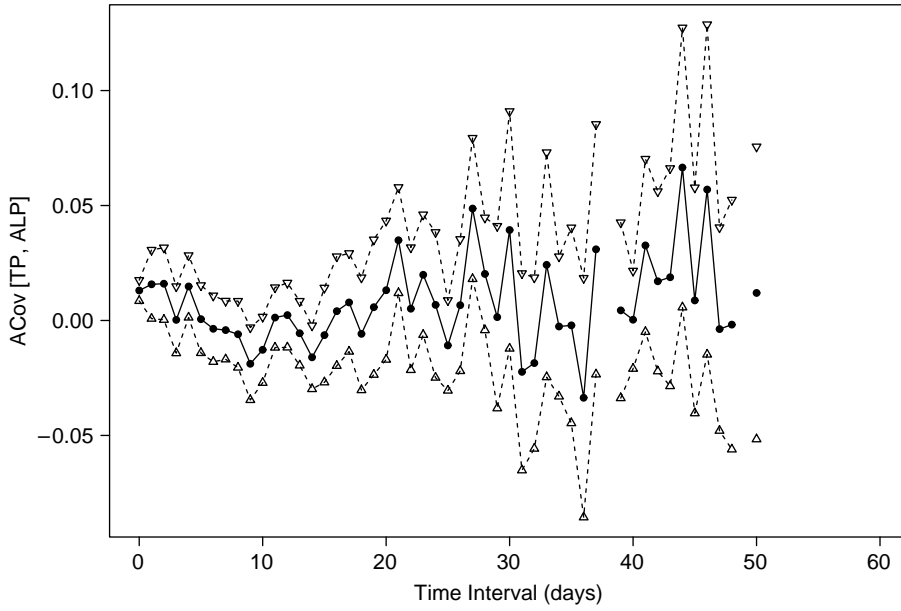

Figure S3.106. TP and ALP Sample Auto-covariance by Time Interval.

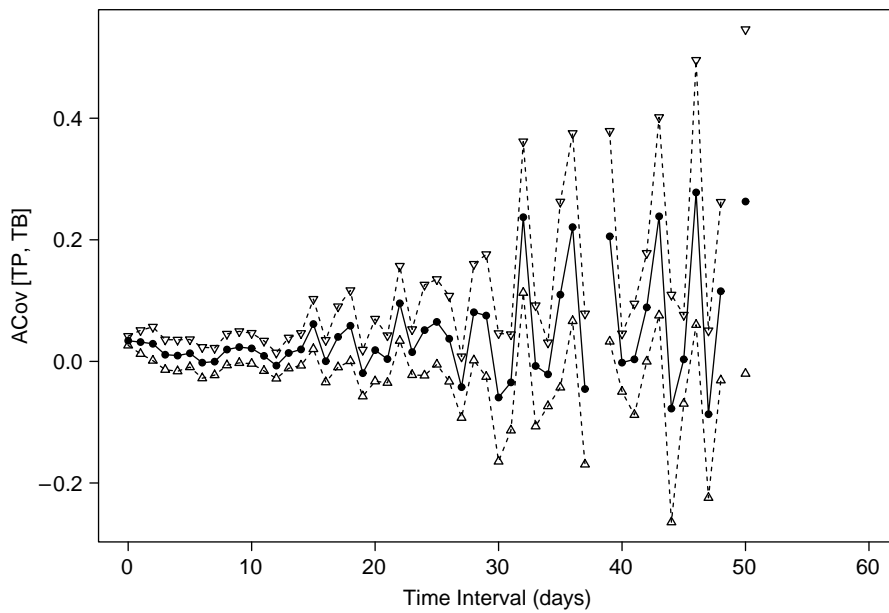

Figure S3.107. TP and TB Sample Auto-covariance by Time Interval.



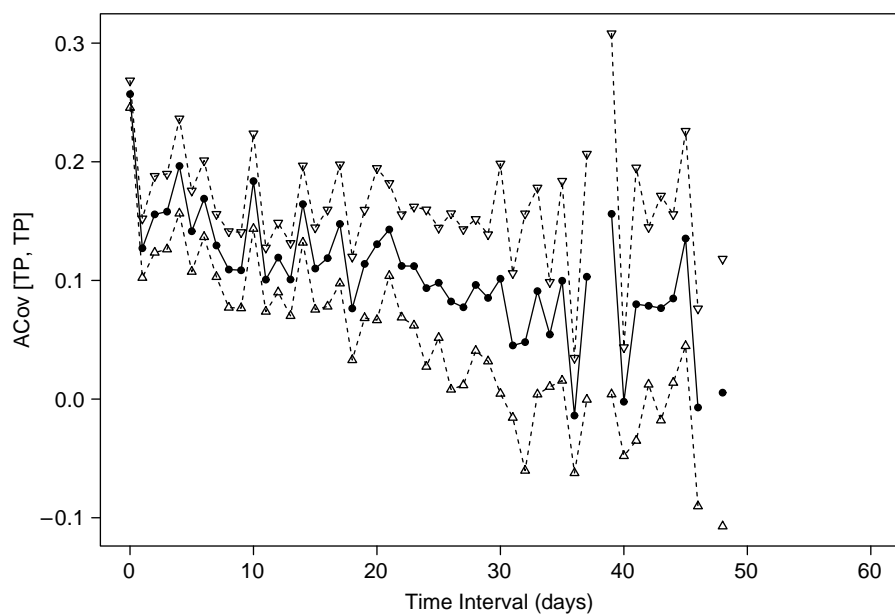

Figure S3.108. TP and TP Sample Auto-covariance by Time Interval.

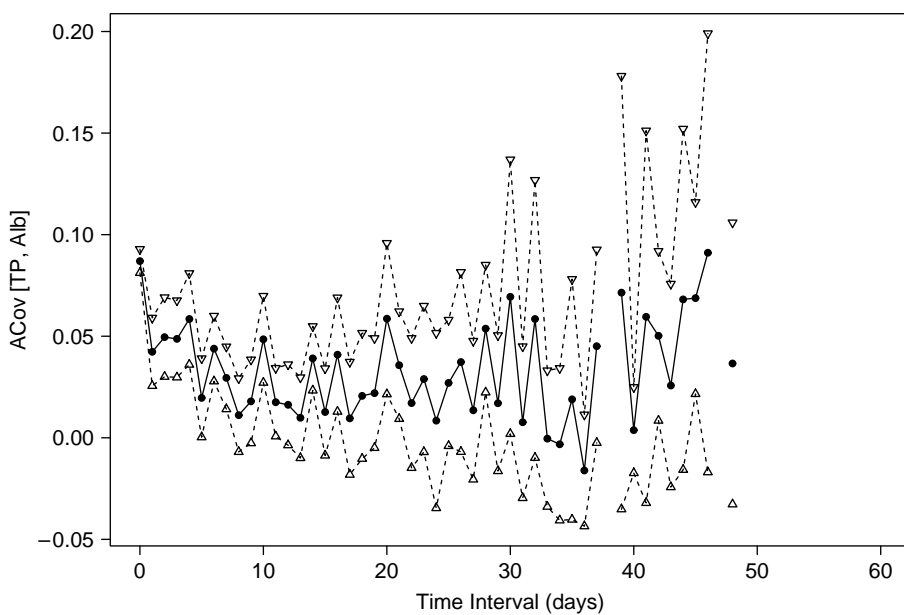

Figure S3.109. TP and Alb Sample Auto-covariance by Time Interval.

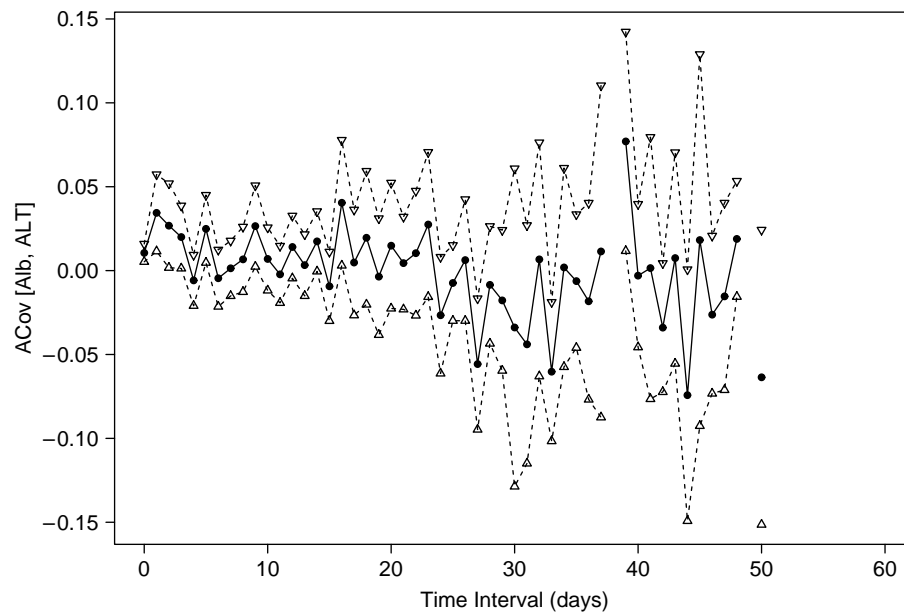

Figure S3.110. Alb and ALT Sample Auto-covariance by Time Interval.

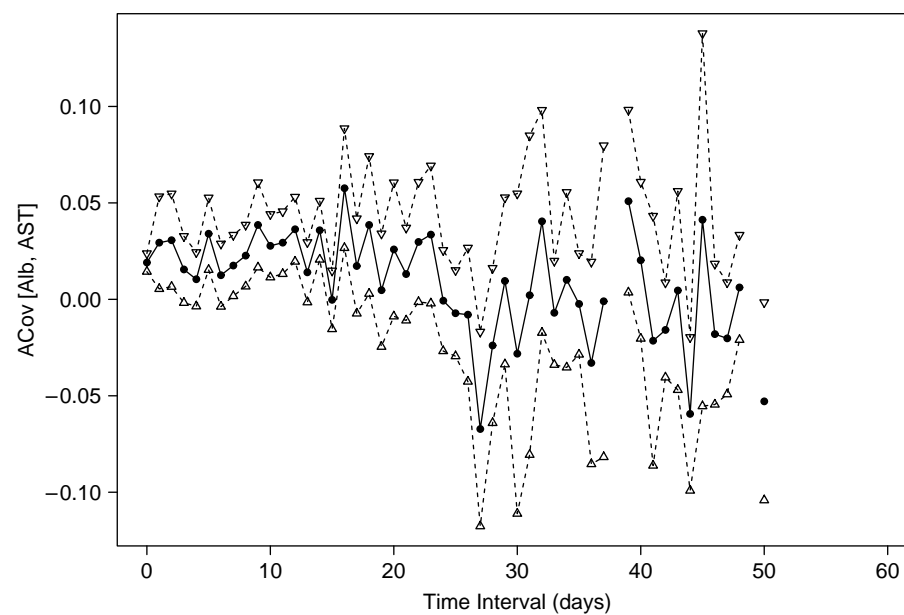

Figure S3.111. Alb and AST Sample Auto-covariance by Time Interval.

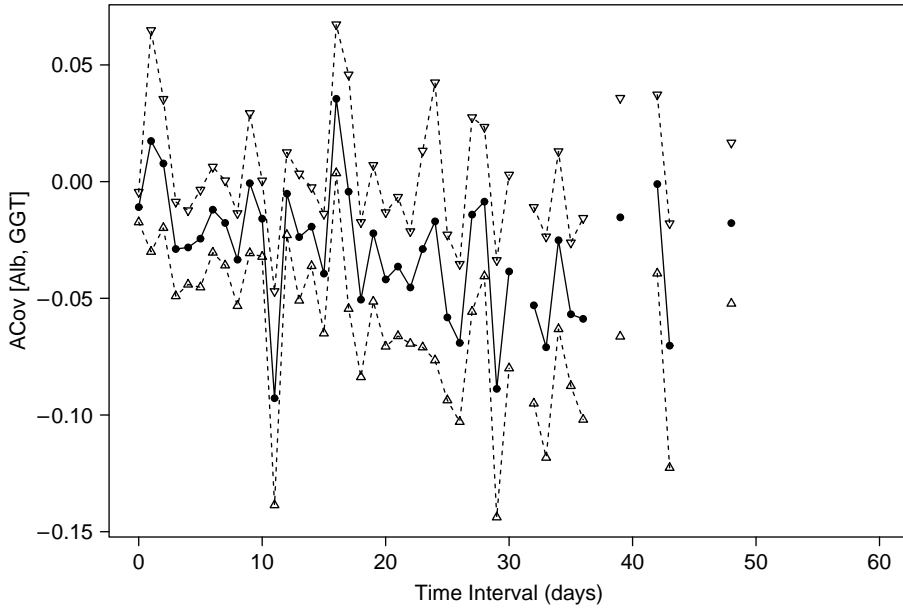

Figure S3.112. Alb and GGT Sample Auto-covariance by Time Interval.

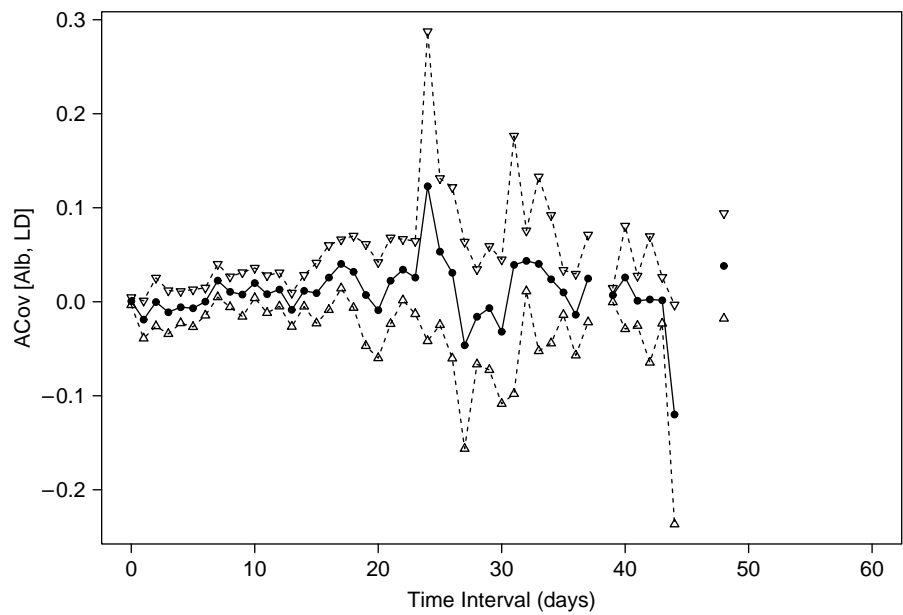

Figure S3.113. Alb and LD Sample Auto-covariance by Time Interval.

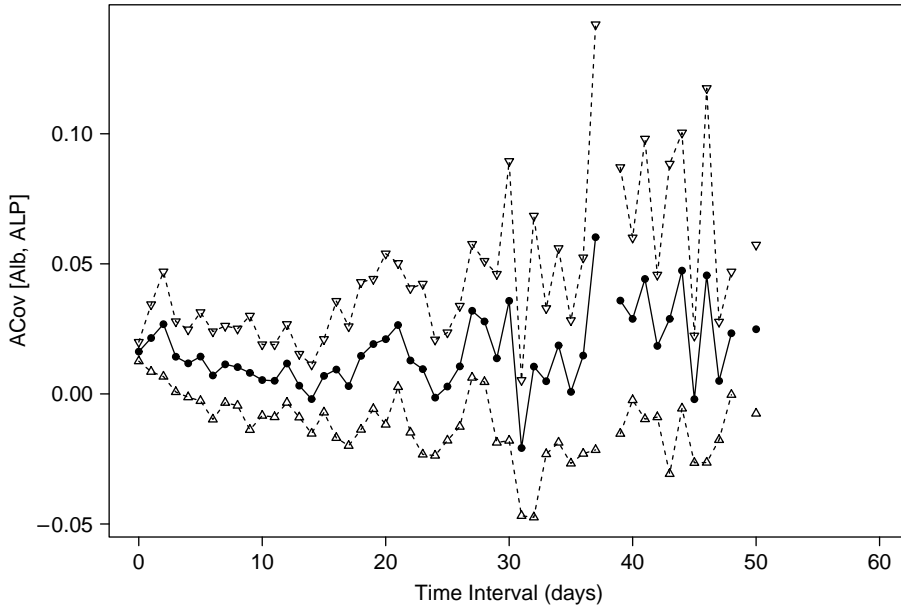

Figure S3.114. Alb and ALP Sample Auto-covariance by Time Interval.

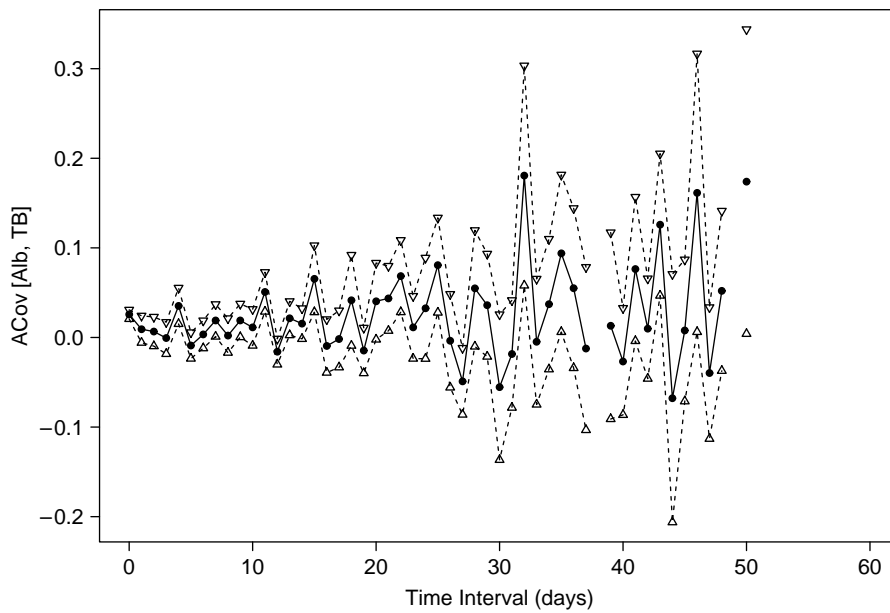

Figure S3.115. Alb and TB Sample Auto-covariance by Time Interval.

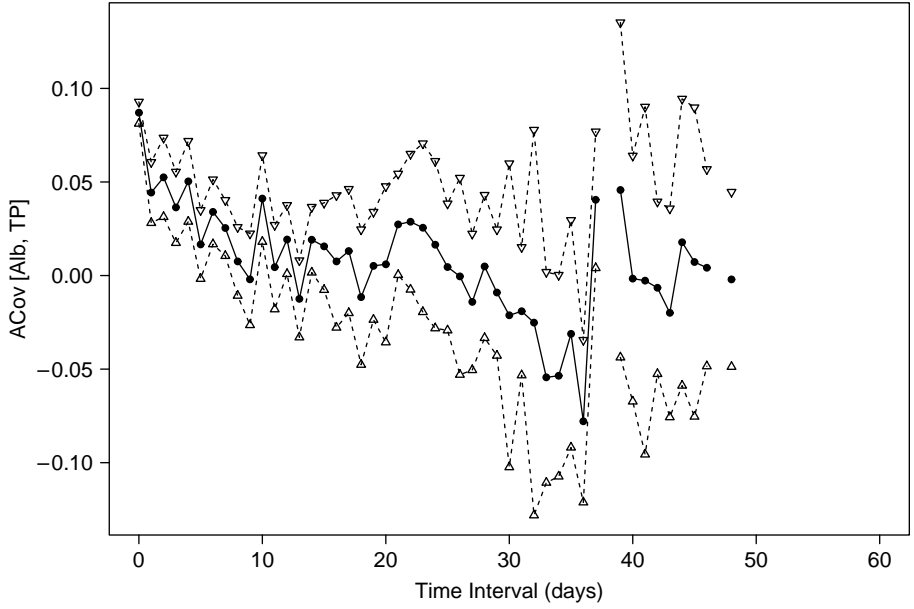

Figure S3.116. Alb and TP Sample Auto-covariance by Time Interval.

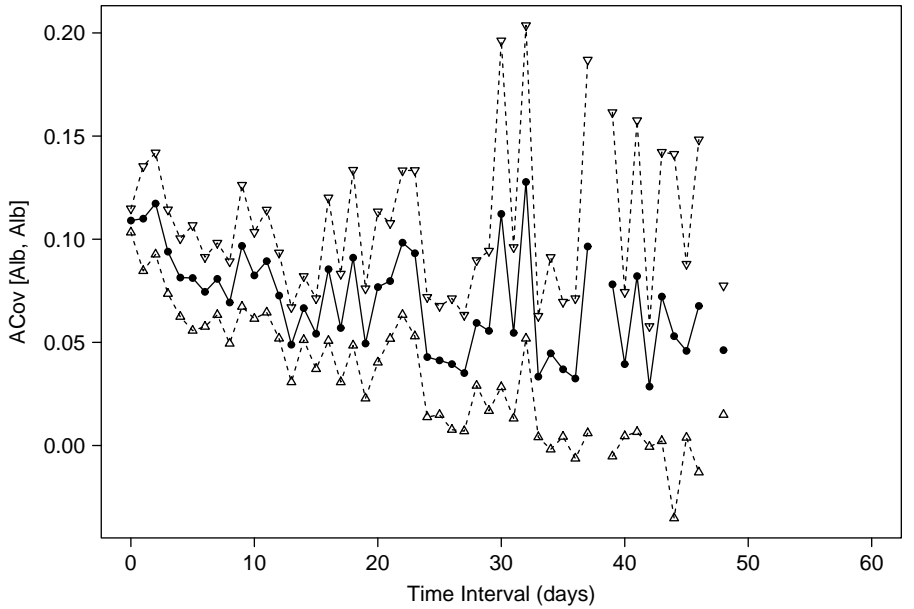

Figure S3.117. Alb and Alb Sample Auto-covariance by Time Interval.

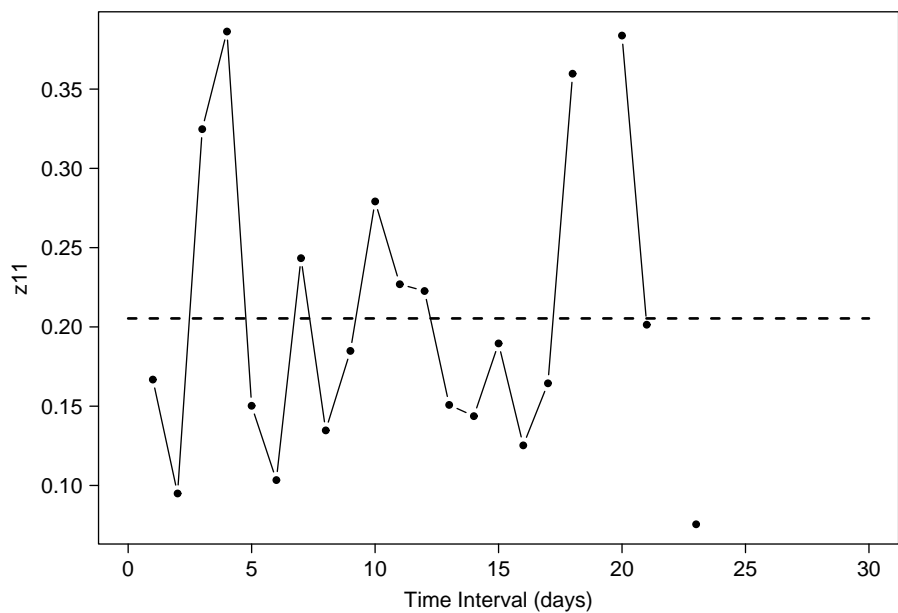

Figure S3.118. Sample Estimate of  $z_{11}$  0.2054.

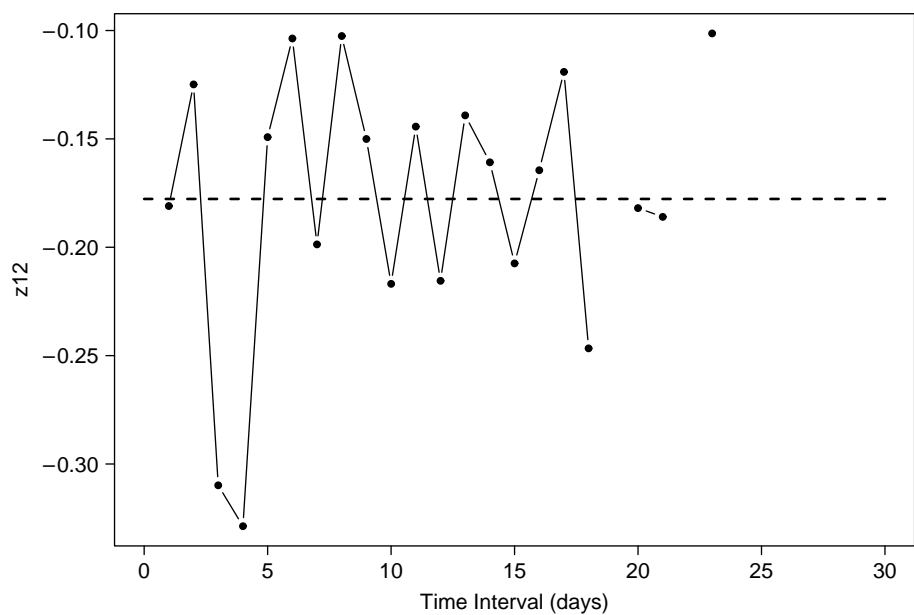

Figure S3.119. Sample Estimate of  $z_{12}$   $-0.1777$ .

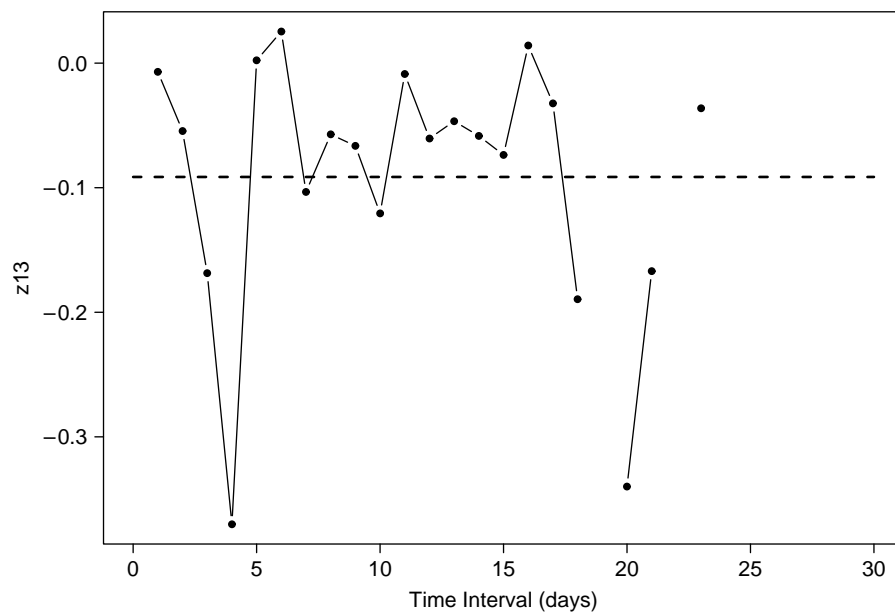

Figure S3.120. Sample Estimate of  $z_{13} - 0.0914$ .

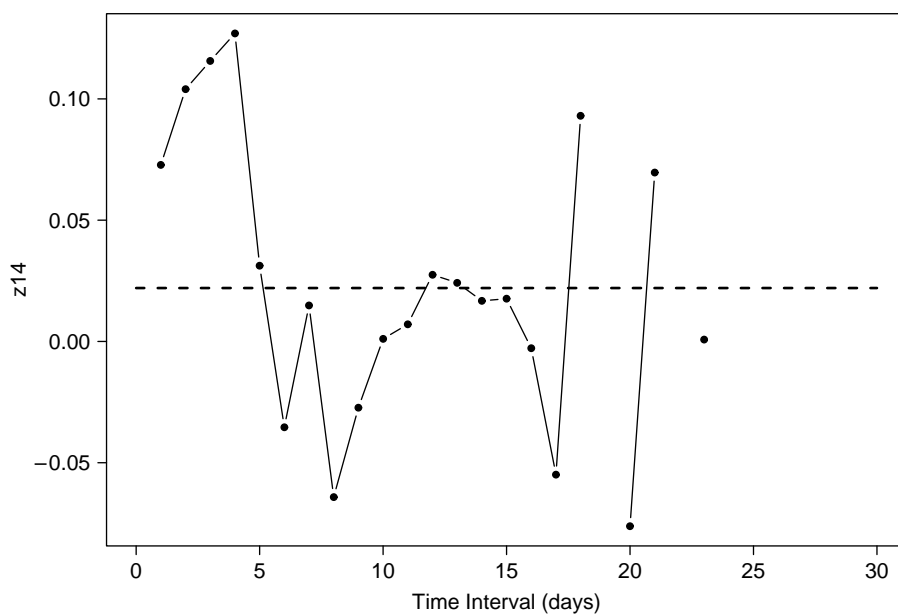

Figure S3.121. Sample Estimate of  $z_{14} 0.022$ .

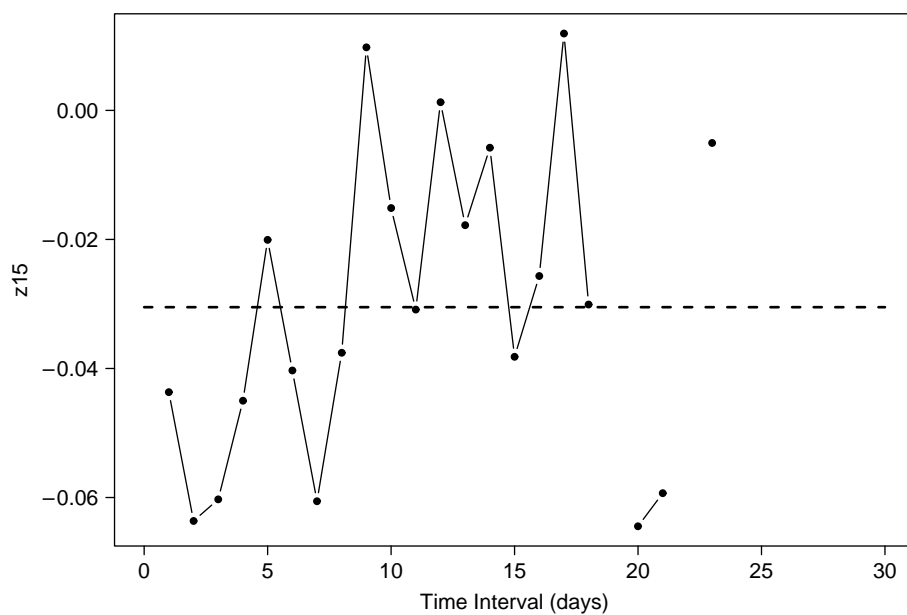

Figure S3.122. Sample Estimate of  $z_{15} - 0.0305$ .

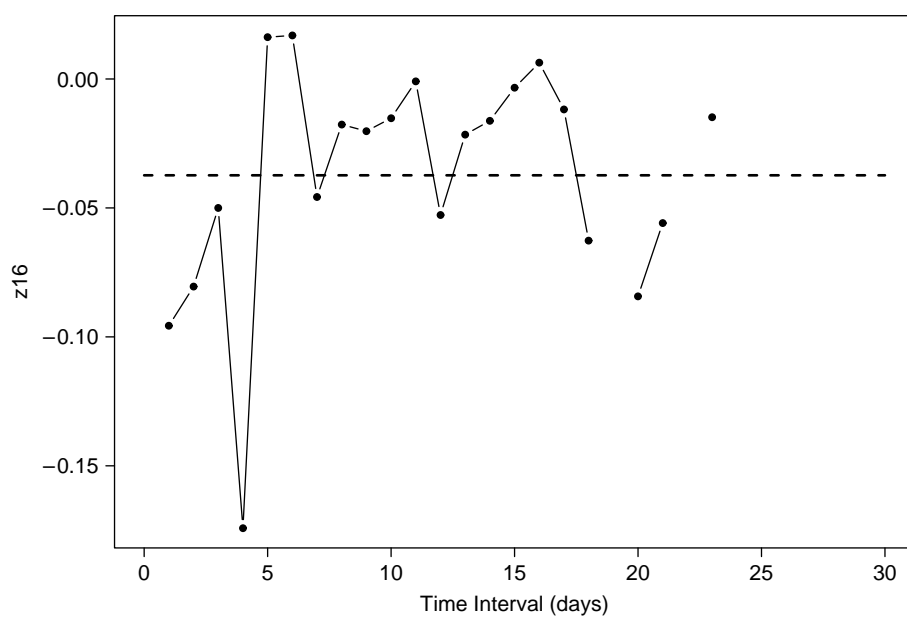

Figure S3.123. Sample Estimate of  $z_{16} - 0.0373$ .



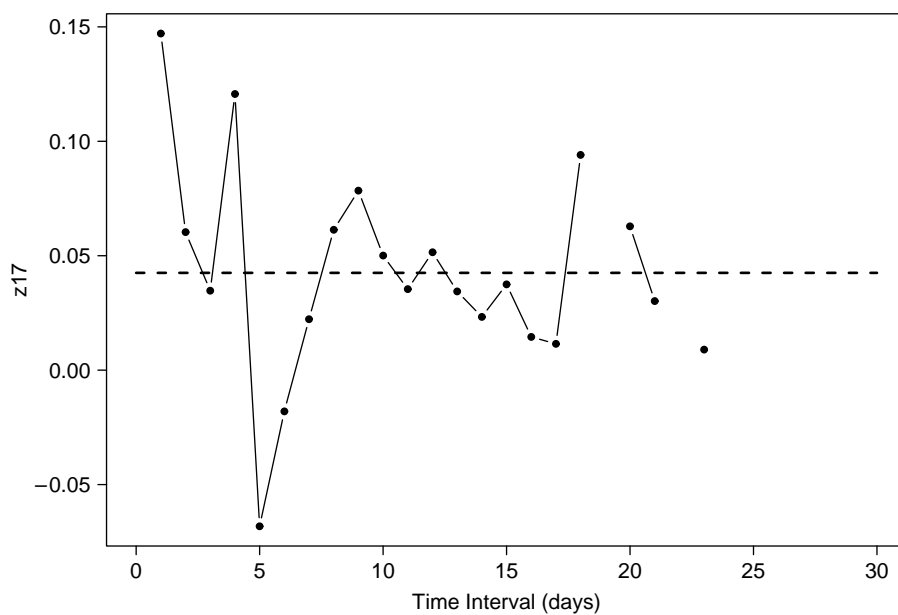

Figure S3.124. Sample Estimate of  $z_{17}$  0.0425.

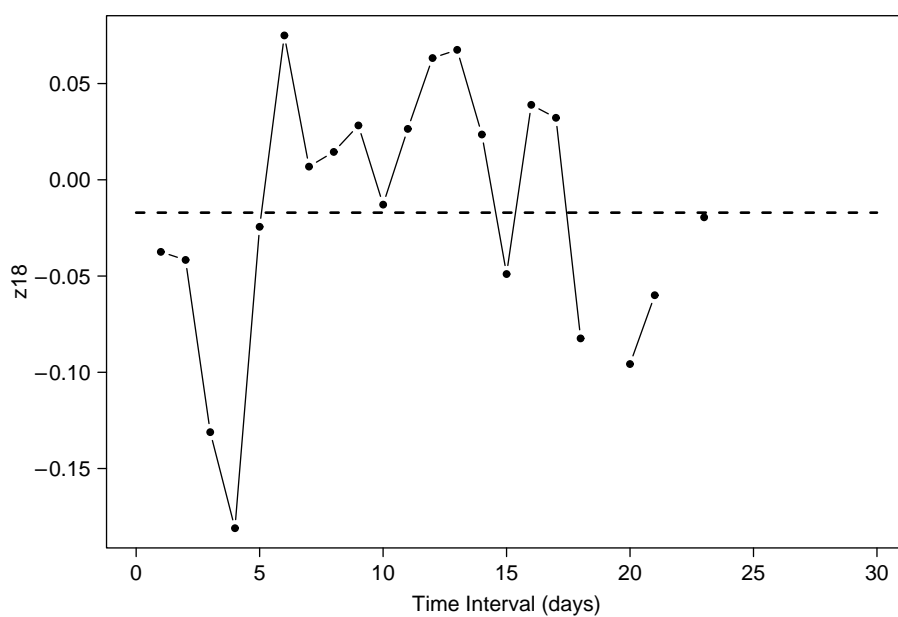

Figure S3.125. Sample Estimate of  $z_{18}$  -0.0171.

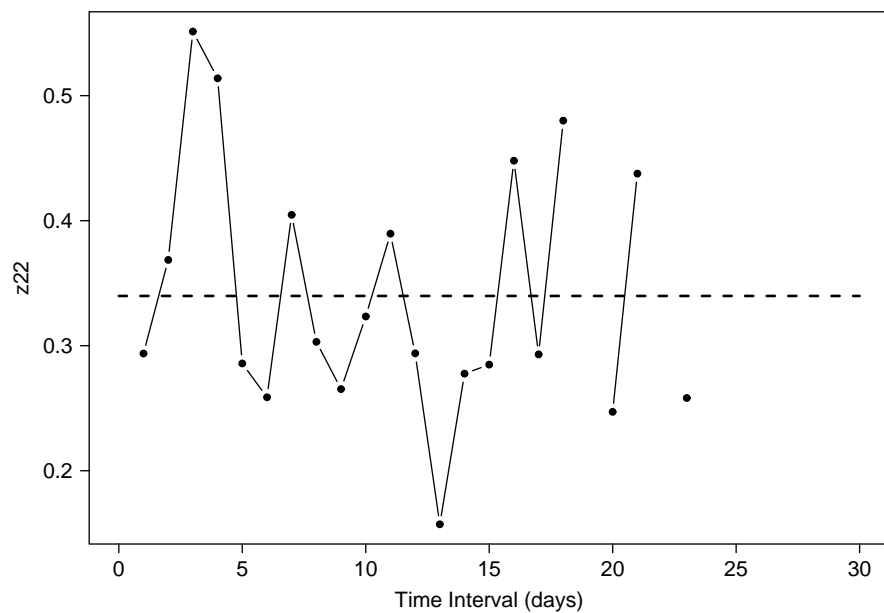

Figure S3.126. Sample Estimate of  $z_{22} = 0.3398$ .

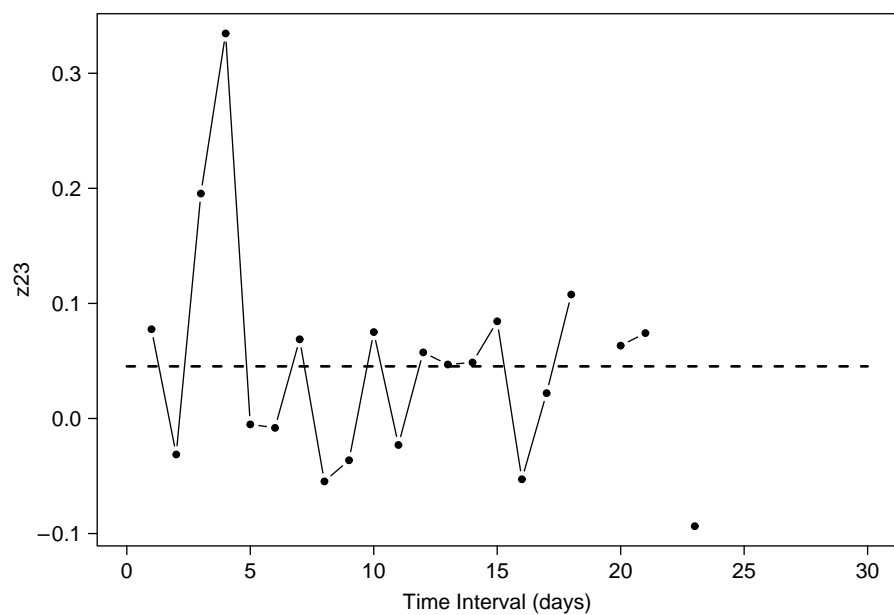

Figure S3.127. Sample Estimate of  $z_{23} = 0.0453$ .

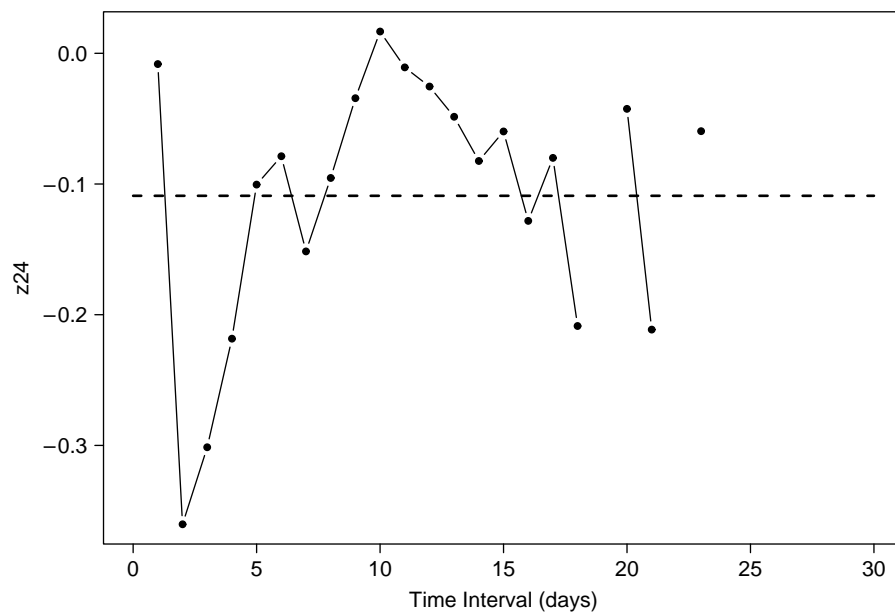

Figure S3.128. Sample Estimate of  $z_{24} - 0.109$ .

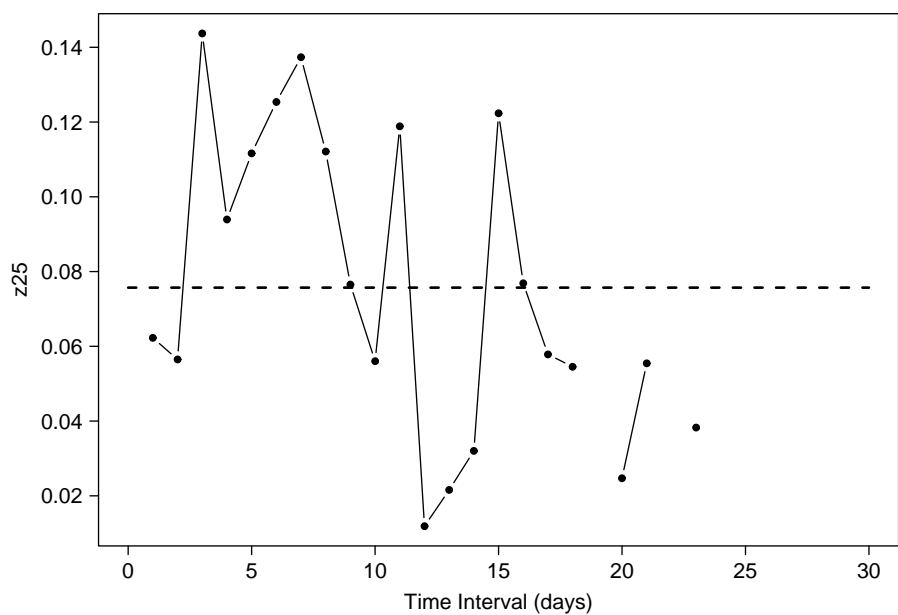

Figure S3.129. Sample Estimate of  $z_{25} 0.0757$ .

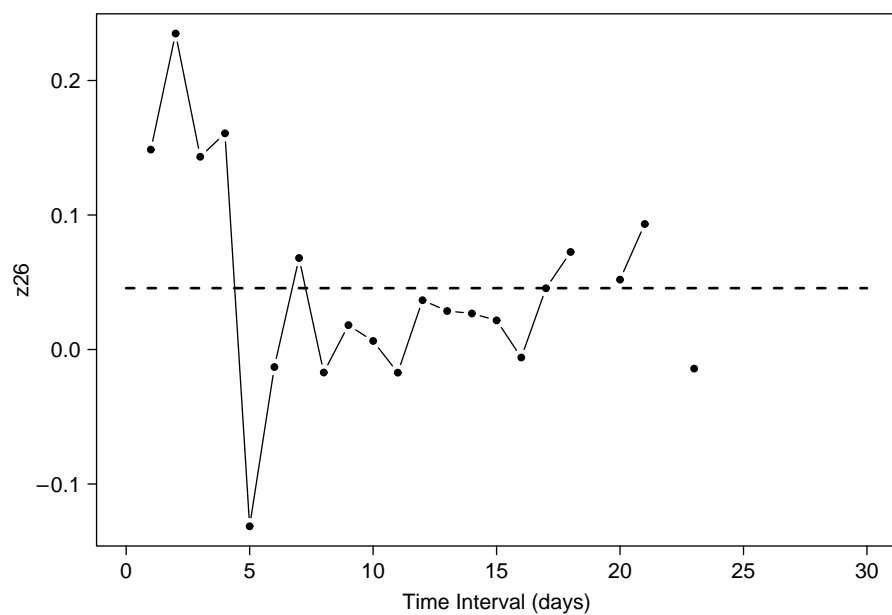

Figure S3.130. Sample Estimate of  $z_{26}$  0.0456.

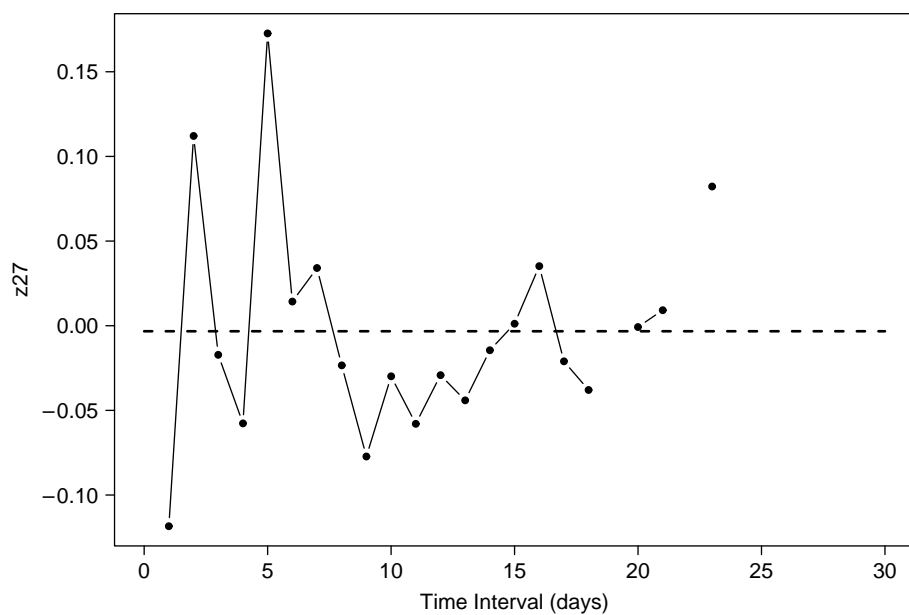

Figure S3.131. Sample Estimate of  $z_{27} - 0.0033$ .

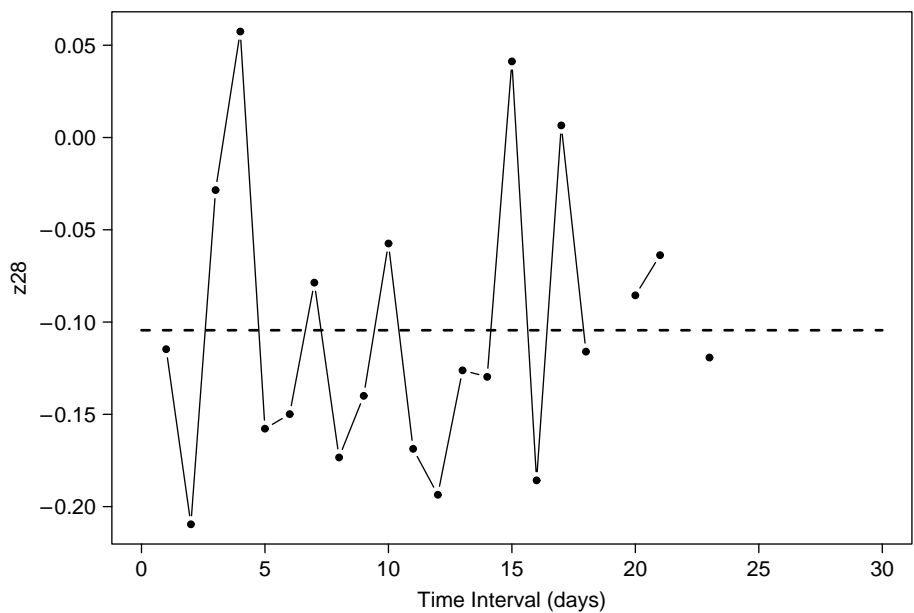

Figure S3.132. Sample Estimate of  $z_{28} - 0.1044$ .

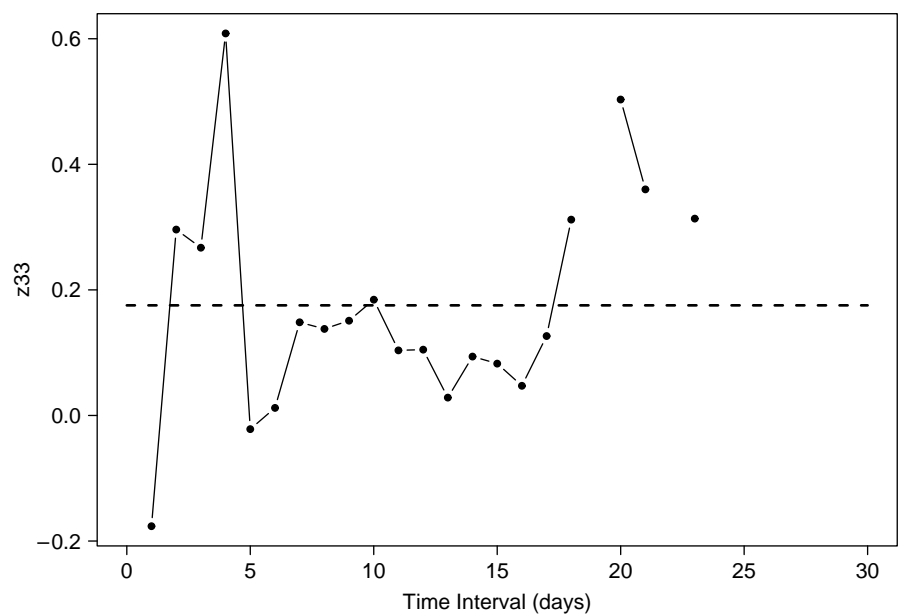

Figure S3.133. Sample Estimate of  $z_{33} - 0.1754$ .

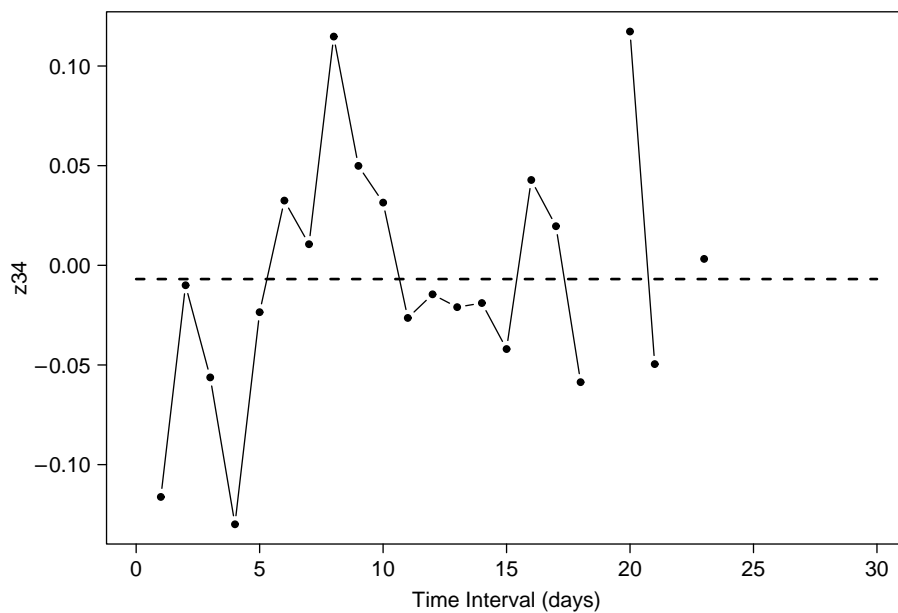

Figure S3.134. Sample Estimate of  $z_{34} - 0.0069$ .

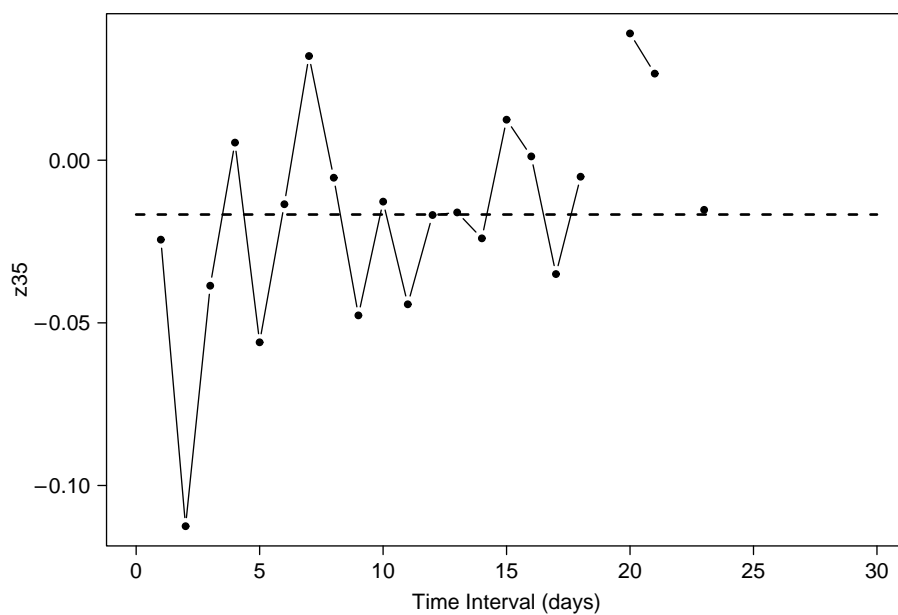

Figure S3.135. Sample Estimate of  $z_{35} - 0.0167$ .

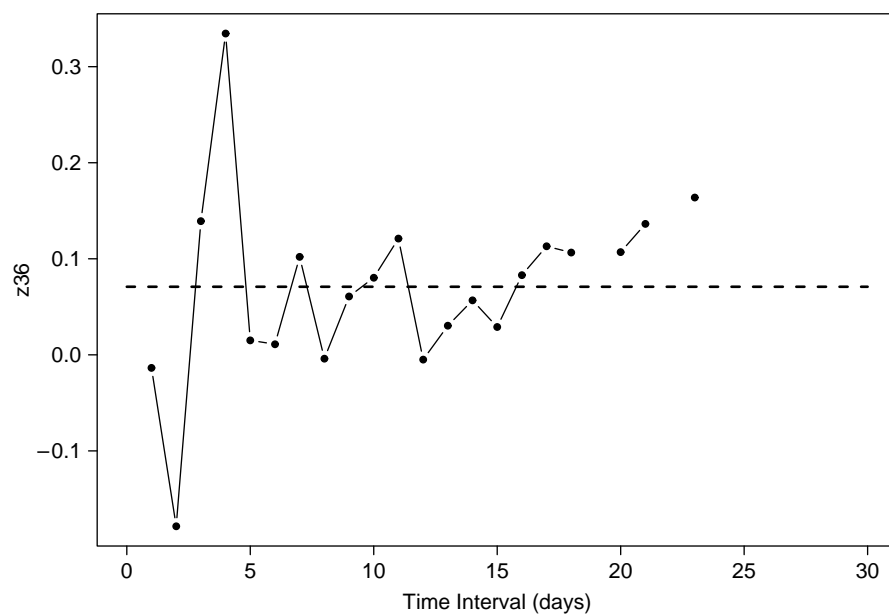

Figure S3.136. Sample Estimate of  $z_{36}$  0.0709.

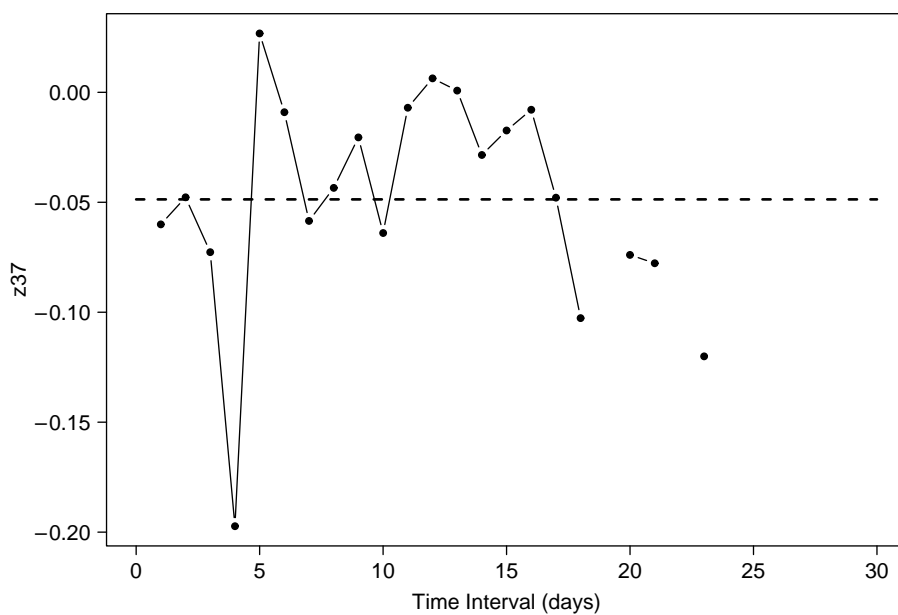

Figure S3.137. Sample Estimate of  $z_{37} - 0.0487$ .

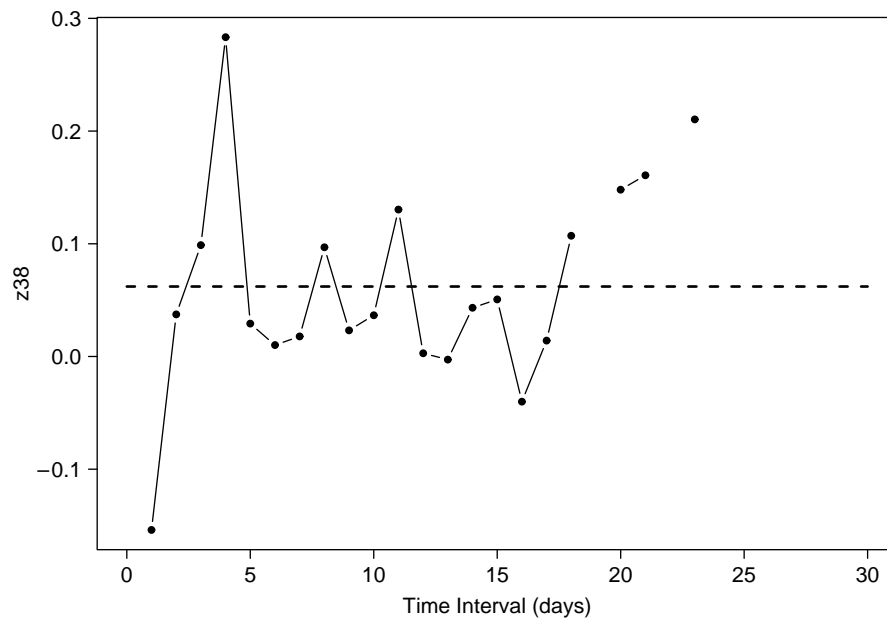

Figure S3.138. Sample Estimate of  $z_{38}$  0.0621.

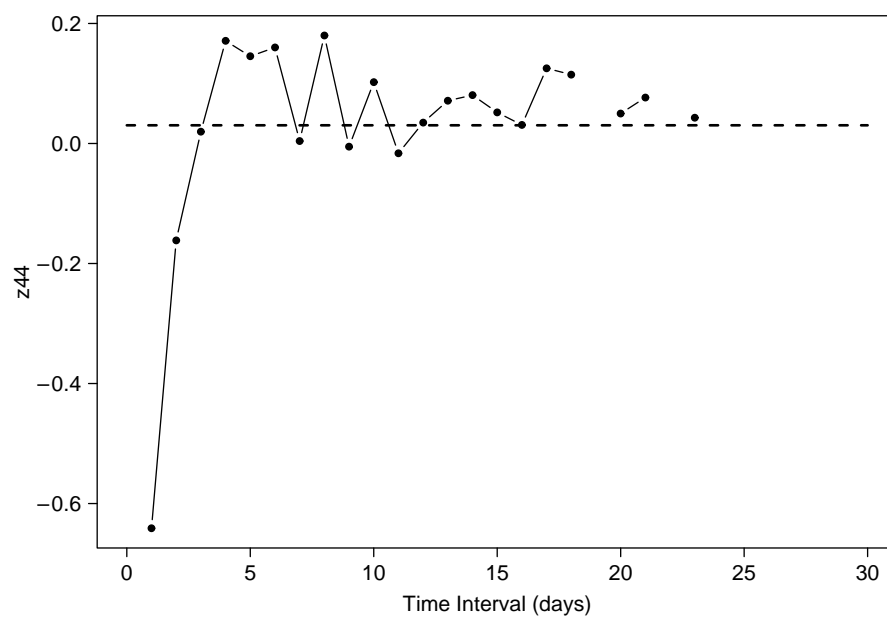

Figure S3.139. Sample Estimate of  $z_{44}$  0.0303.



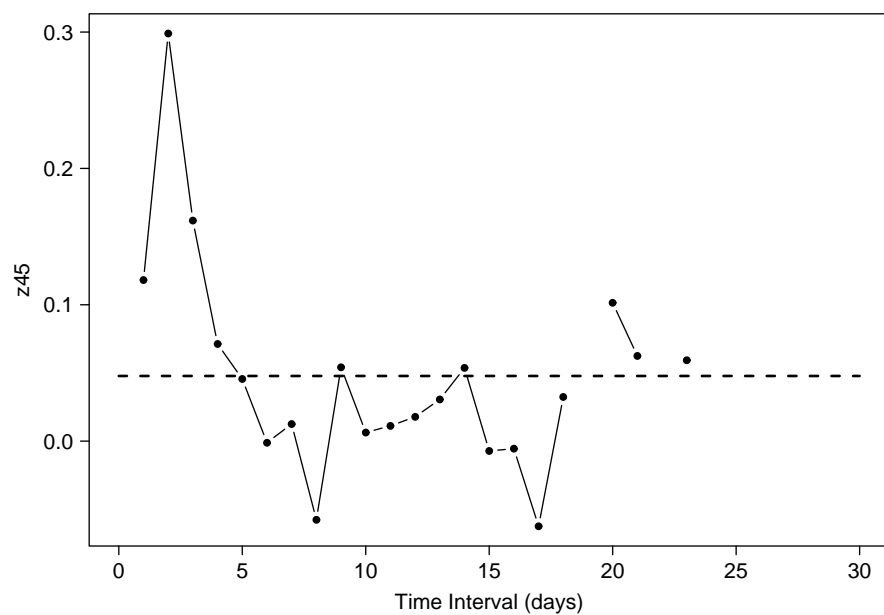

Figure S3.140. Sample Estimate of  $z_{45}$  0.0478.

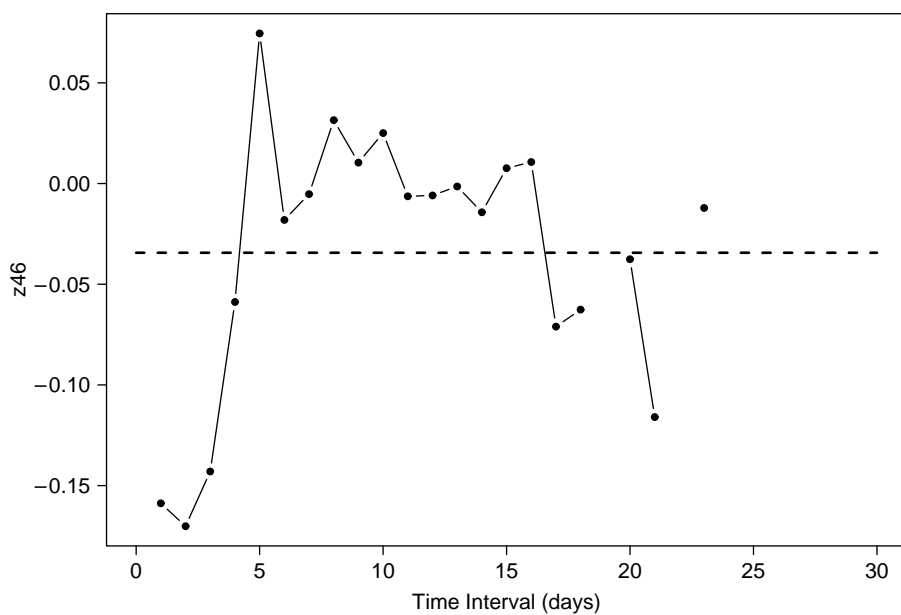

Figure S3.141. Sample Estimate of  $z_{46}$  -0.0344.

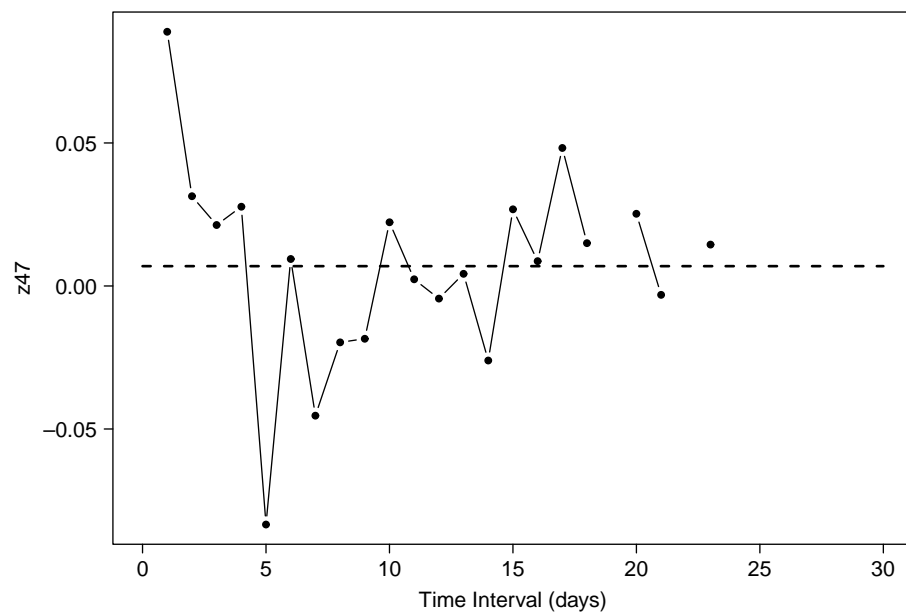

Figure S3.142. Sample Estimate of  $z_{47}$  0.0069.

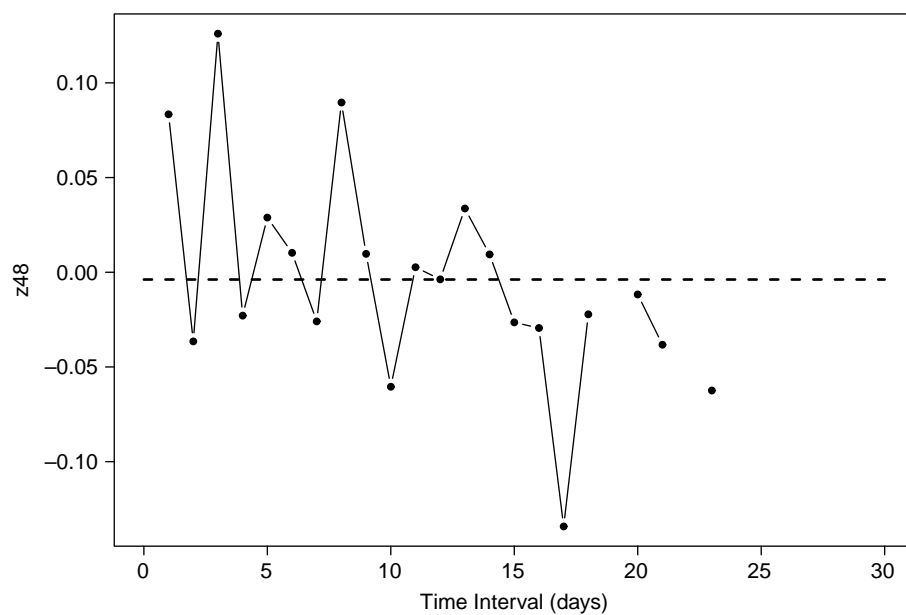

Figure S3.143. Sample Estimate of  $z_{48}$   $-0.0038$ .

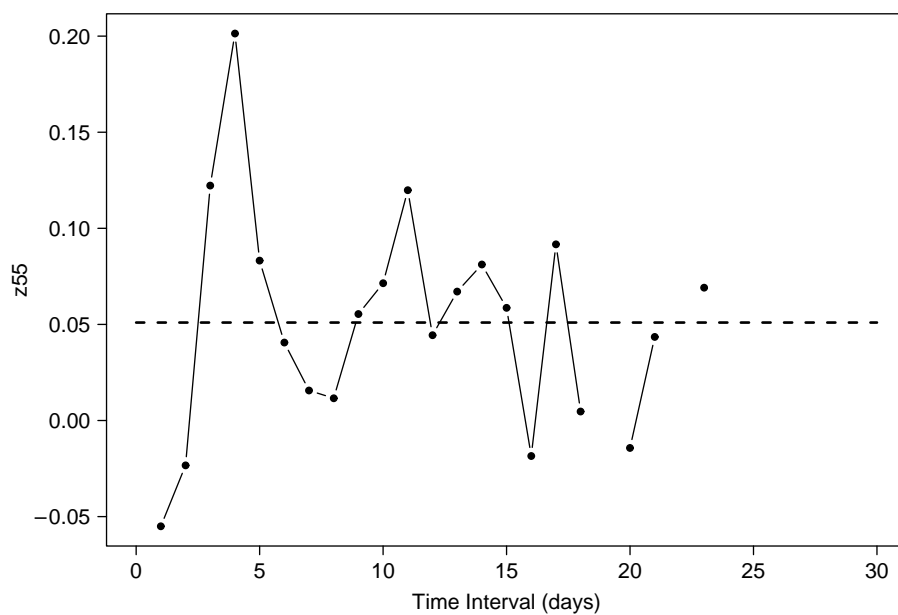

Figure S3.144. Sample Estimate of  $z_{55}$  0.051.

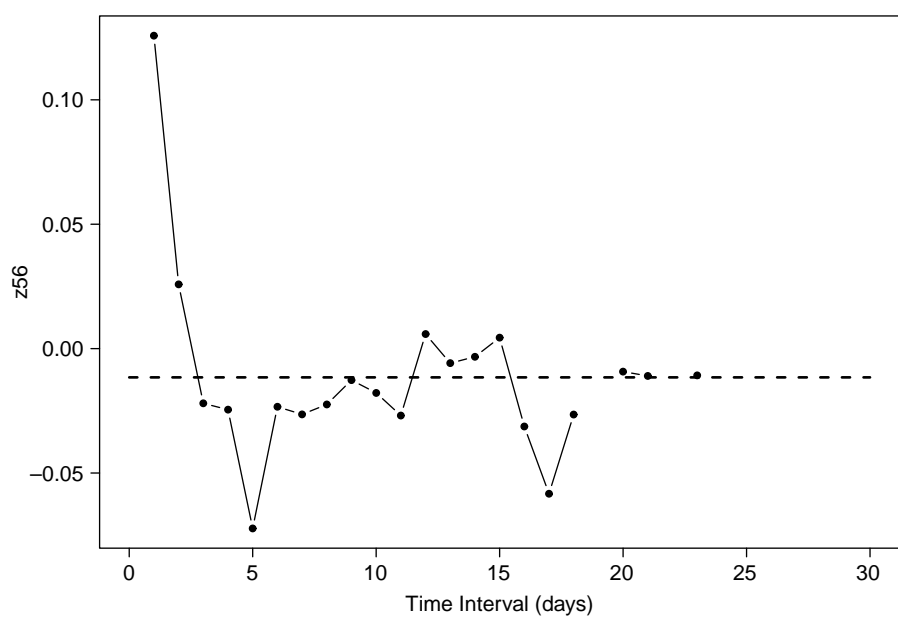

Figure S3.145. Sample Estimate of  $z_{56} - 0.0116$ .

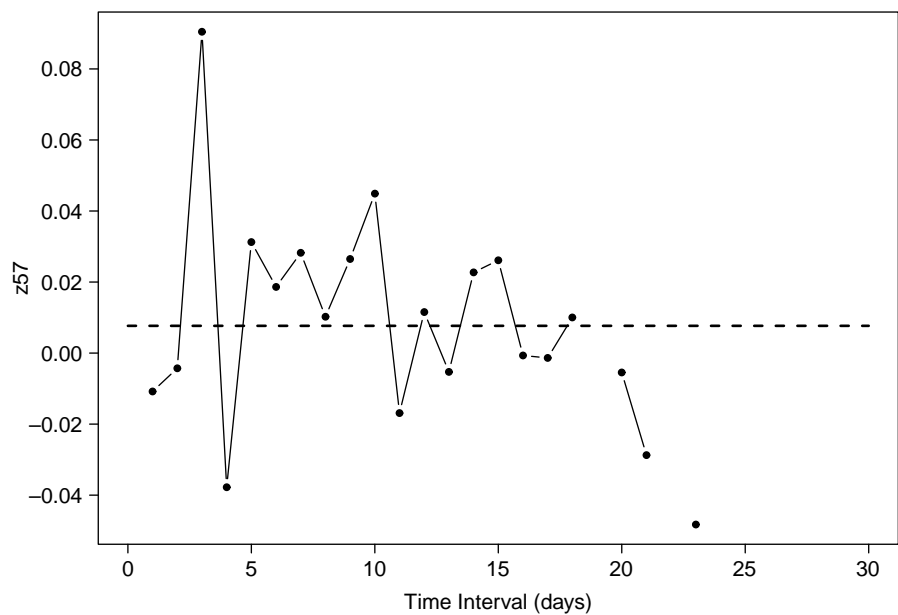

Figure S3.146. Sample Estimate of  $z_{57}$  0.0077.

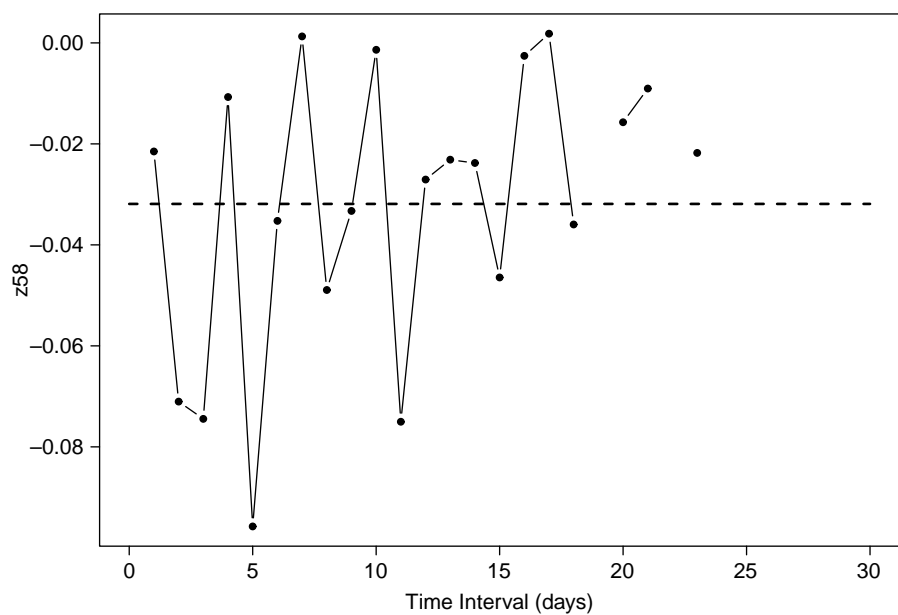

Figure S3.147. Sample Estimate of  $z_{58}$  -0.0319.

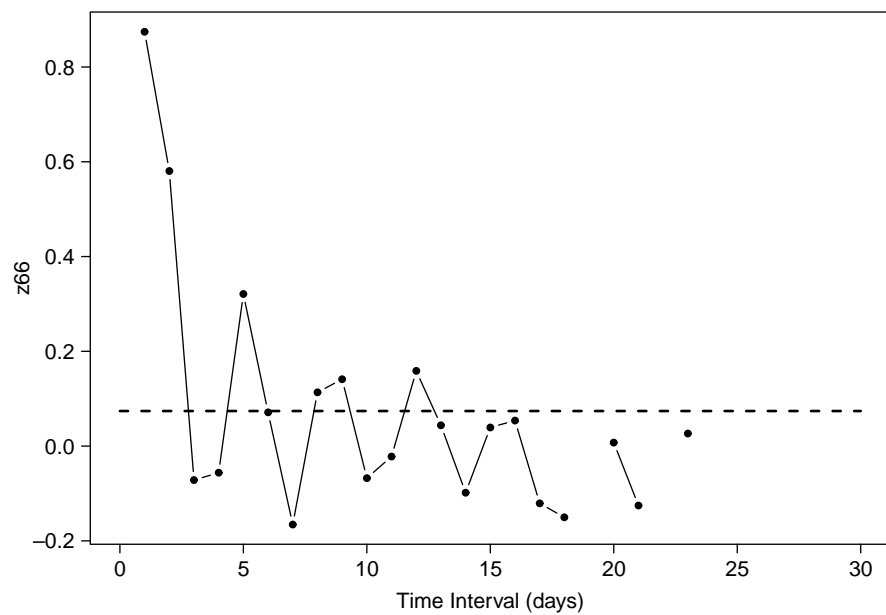

Figure S3.148. Sample Estimate of  $z_{66}$  0.074.

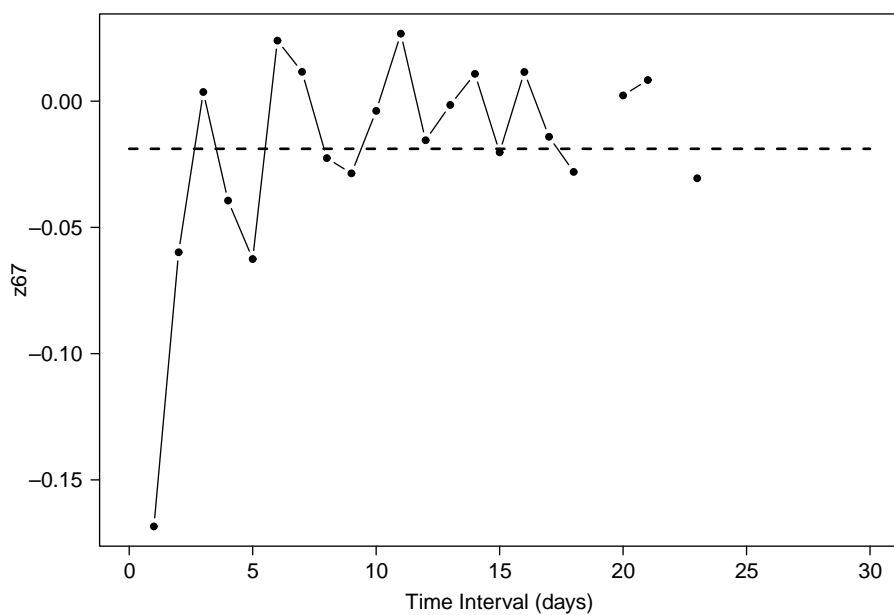

Figure S3.149. Sample Estimate of  $z_{67} - 0.0189$ .

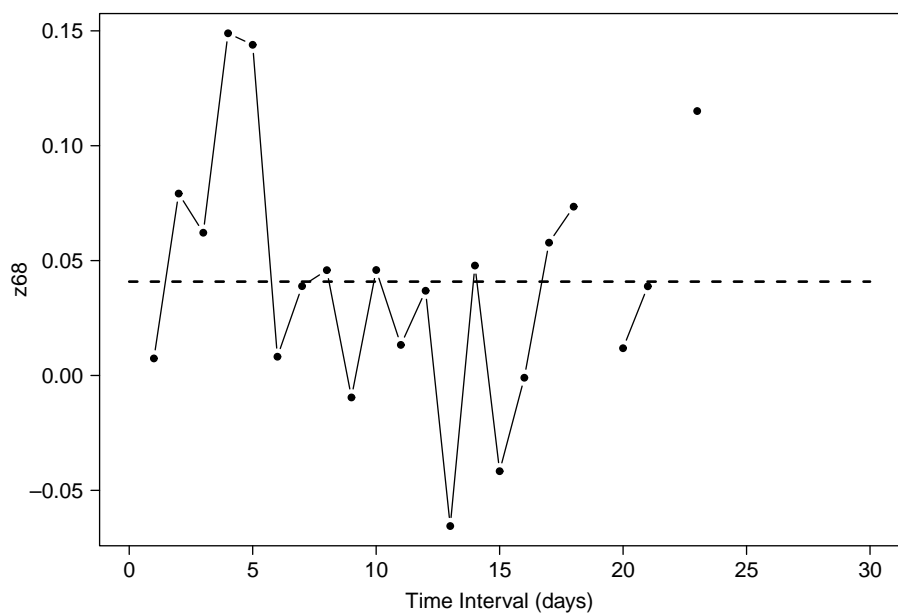

Figure S3.150. Sample Estimate of  $z_{68}$  0.0408.

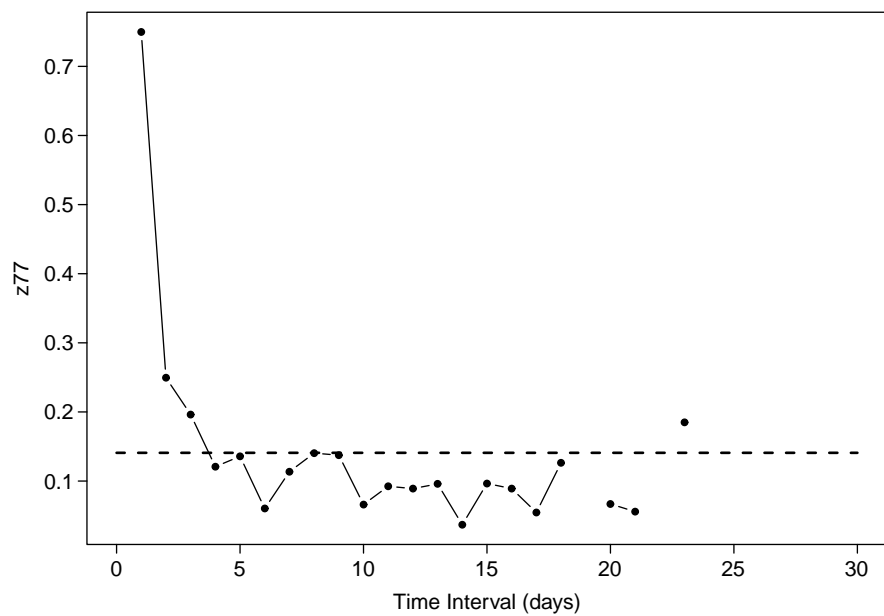

Figure S3.151. Sample Estimate of  $z_{77}$  0.1409.

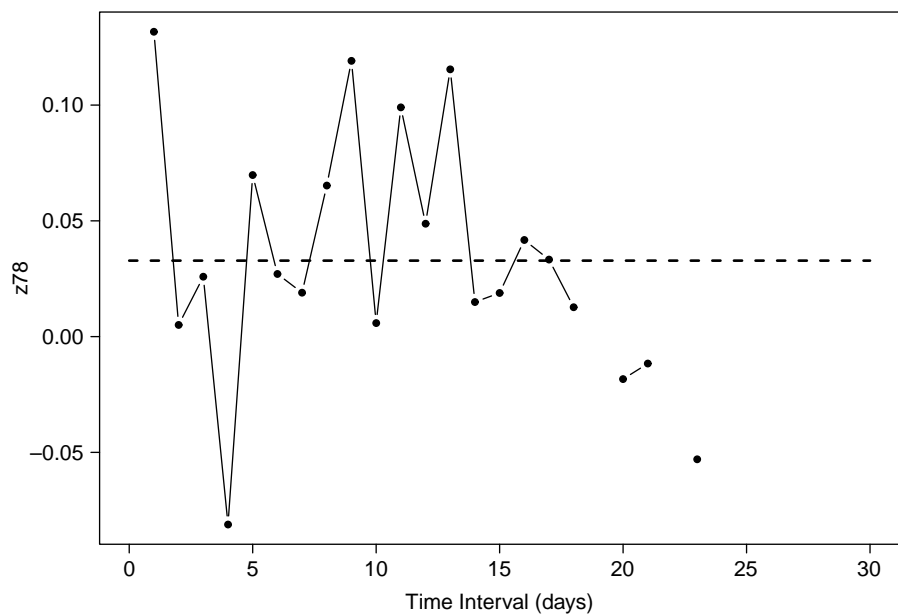

Figure S3.152. Sample Estimate of  $z_{78}$  0.0328.

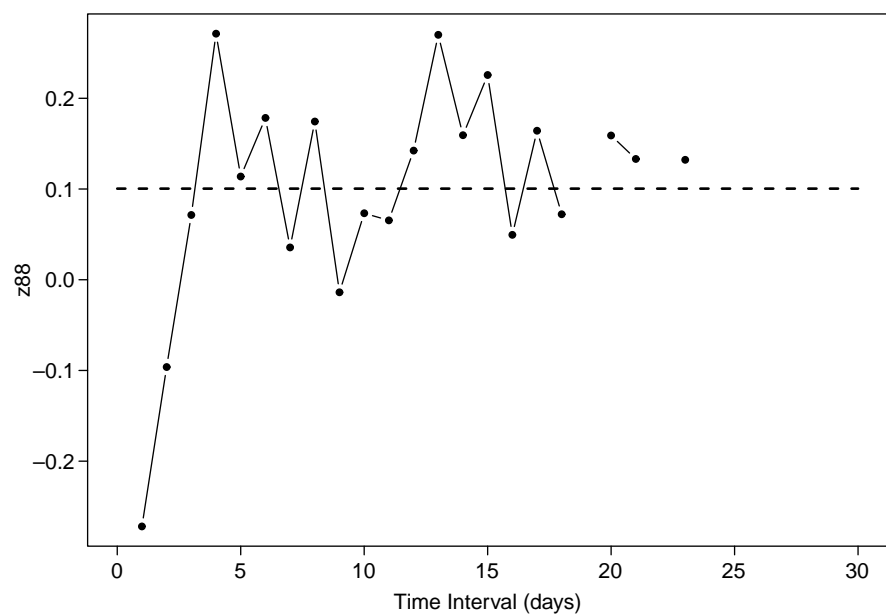

Figure S3.153. Sample Estimate of  $z_{88}$  0.1004.

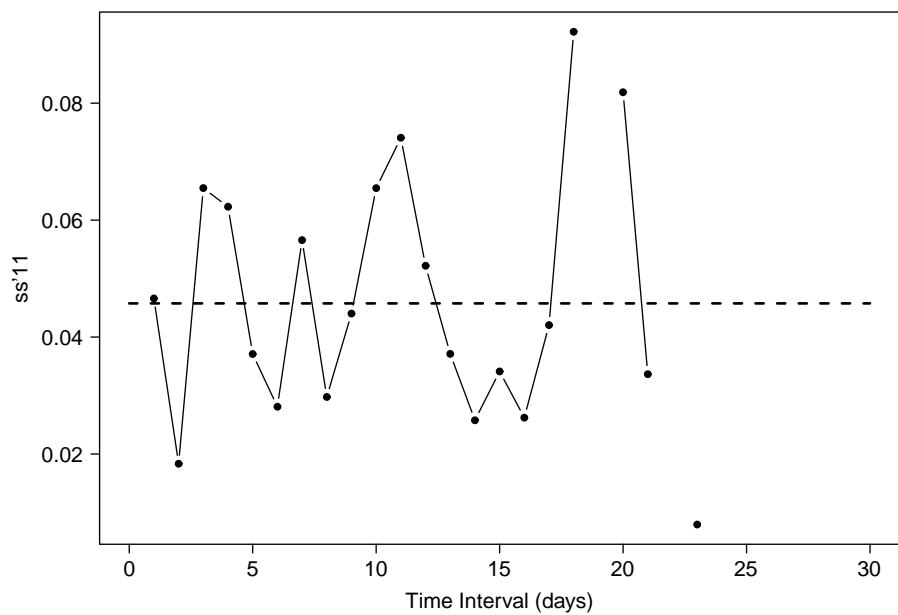

Figure S3.154. Sample Estimate of  $ss'11$  0.0458.

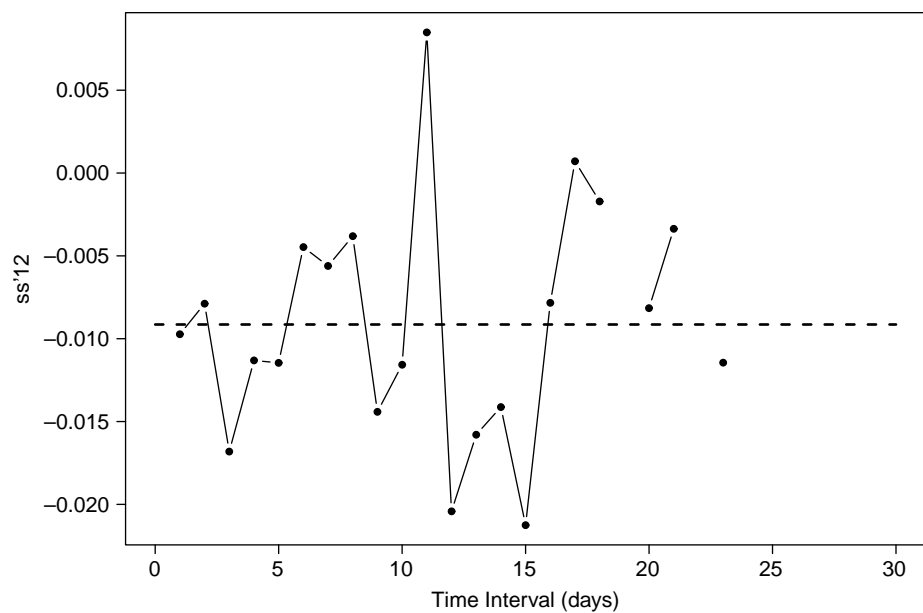

Figure S3.155. Sample Estimate of  $ss'12$  -0.0091.



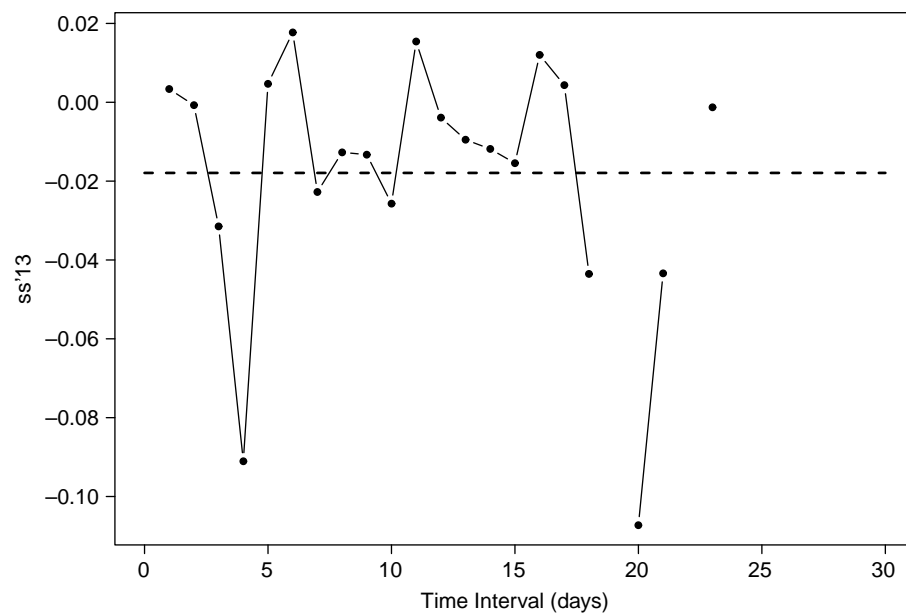

Figure S3.156. Sample Estimate of  $ss'13 = -0.0179$ .

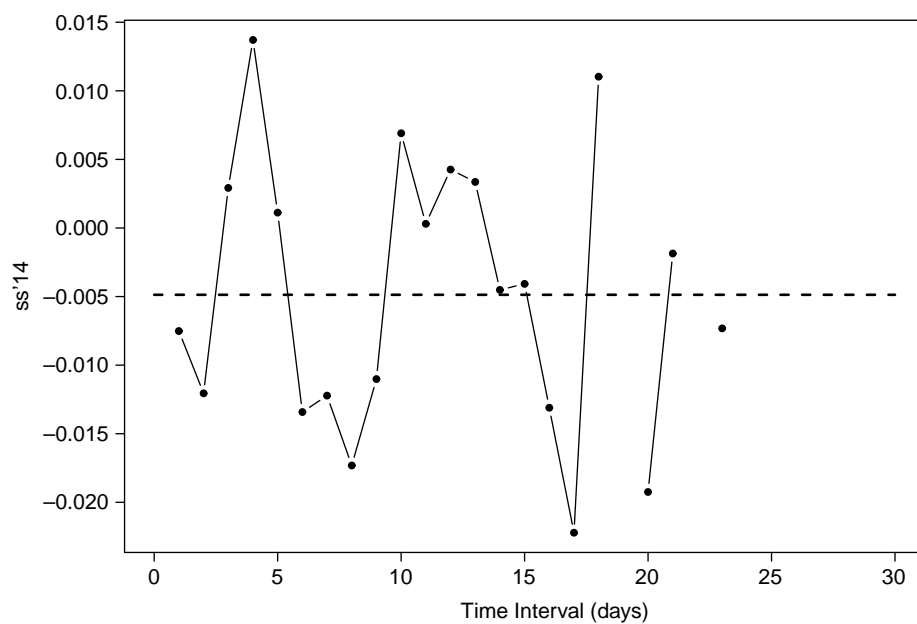

Figure S3.157. Sample Estimate of  $ss'14 = -0.0049$ .

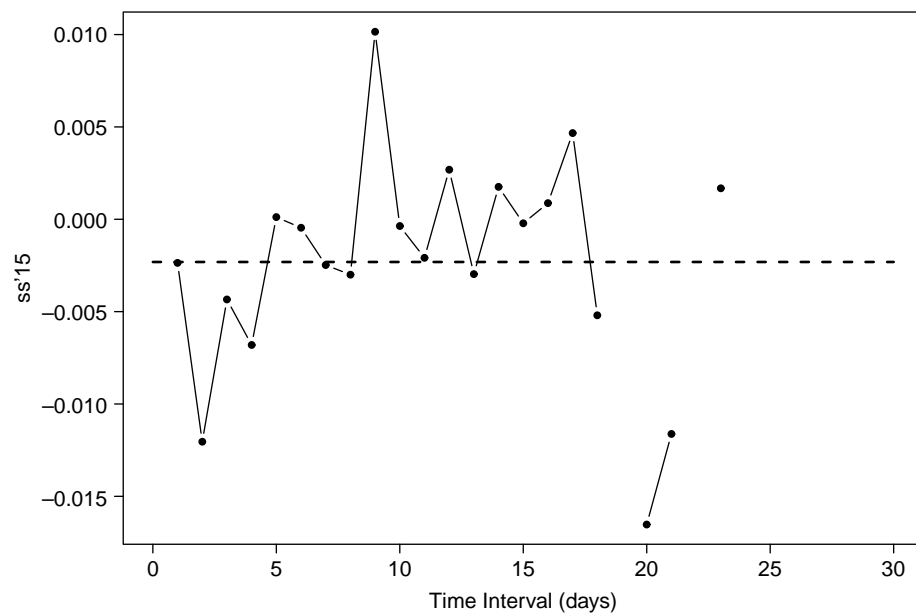

Figure S3.158. Sample Estimate of  $ss'15 - 0.0023$ .

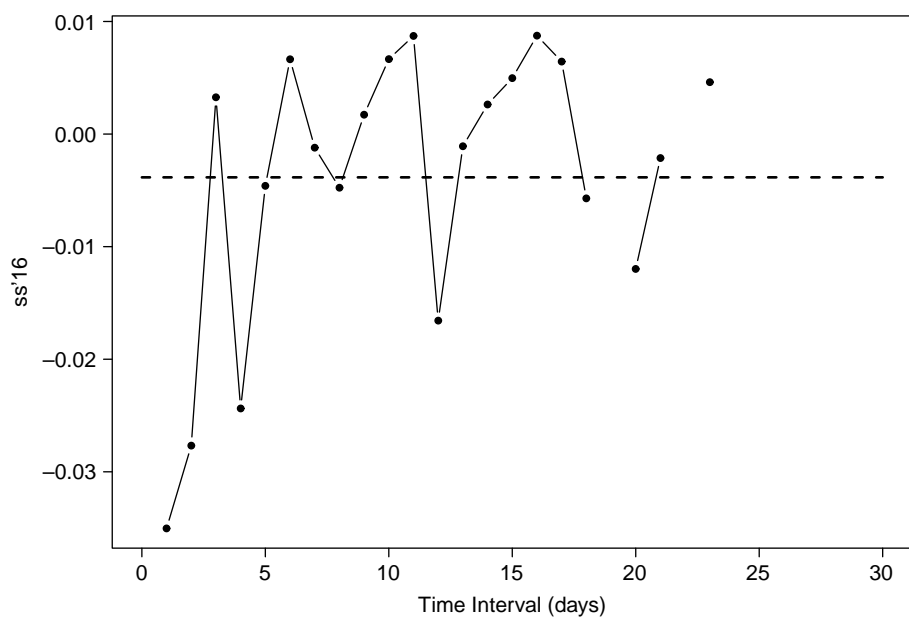

Figure S3.159. Sample Estimate of  $ss'16 - 0.0038$ .

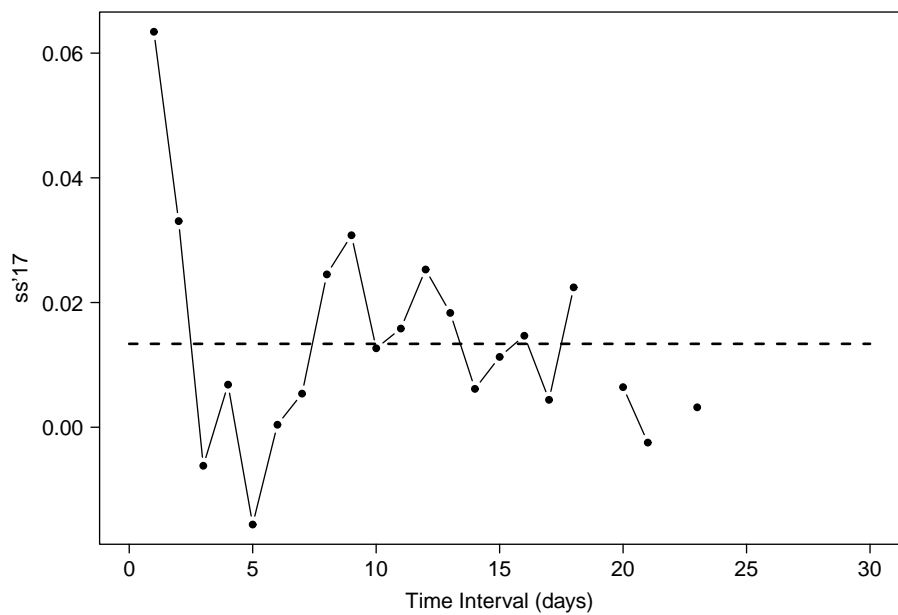

Figure S3.160. Sample Estimate of  $ss'17$  0.0134.

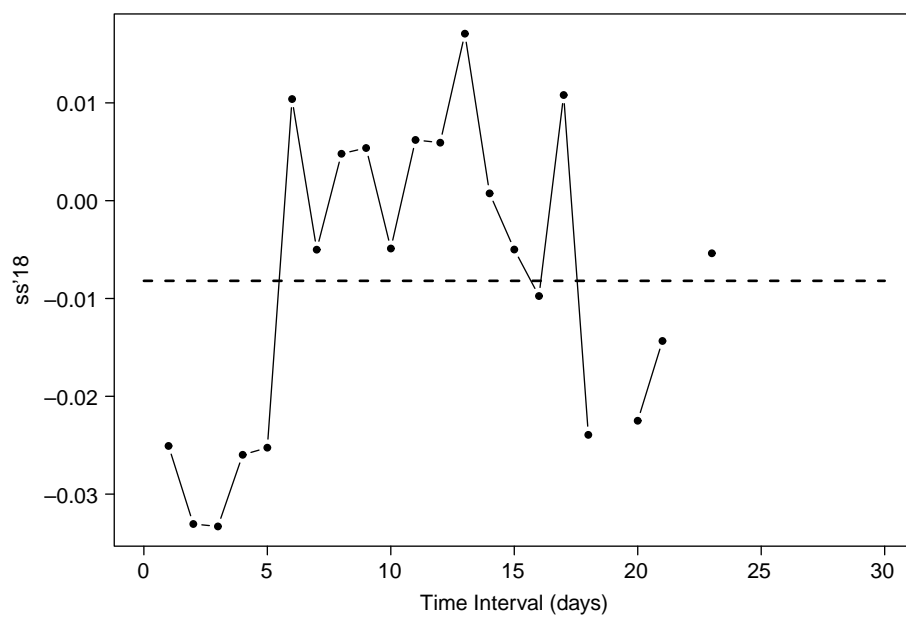

Figure S3.161. Sample Estimate of  $ss'18$  -0.0082.

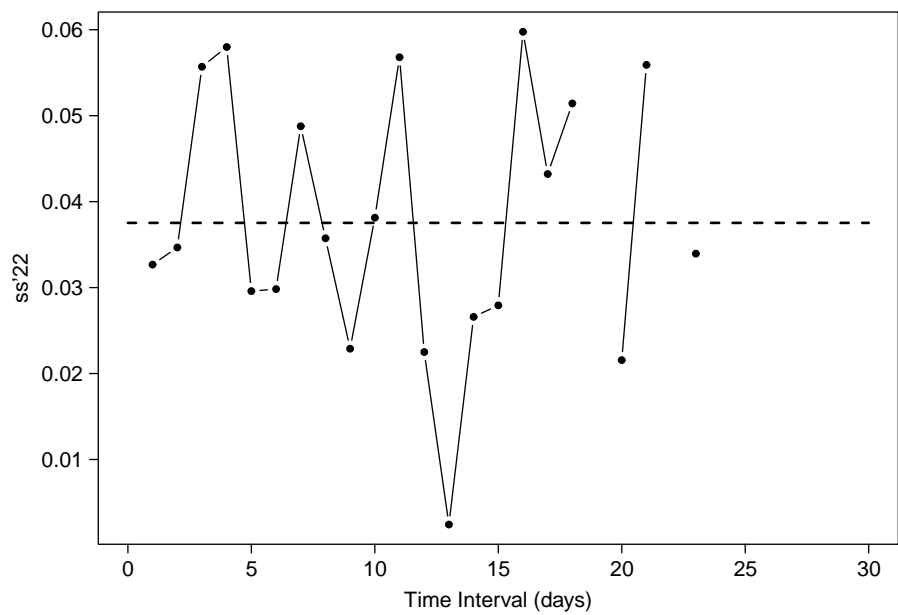

Figure S3.162. Sample Estimate of  $ss'_{22}$  0.0375.

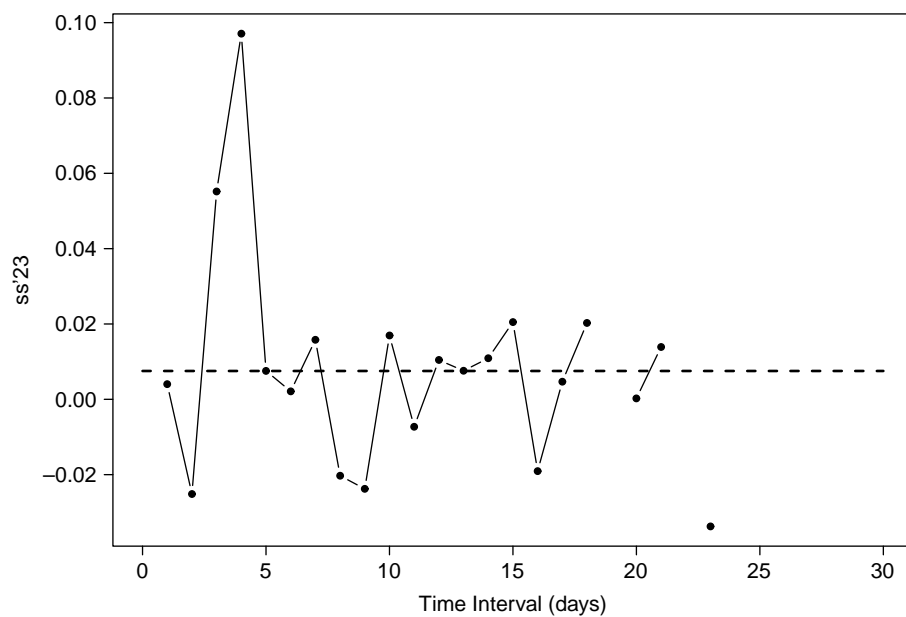

Figure S3.163. Sample Estimate of  $ss'_{23}$  0.0075.

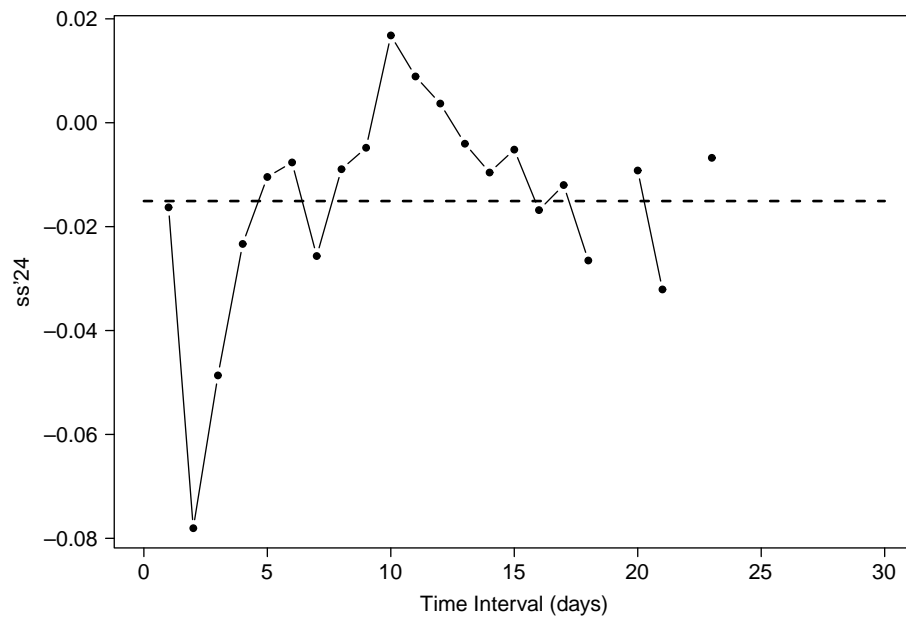

Figure S3.164. Sample Estimate of  $ss'_{24} - 0.0151$ .

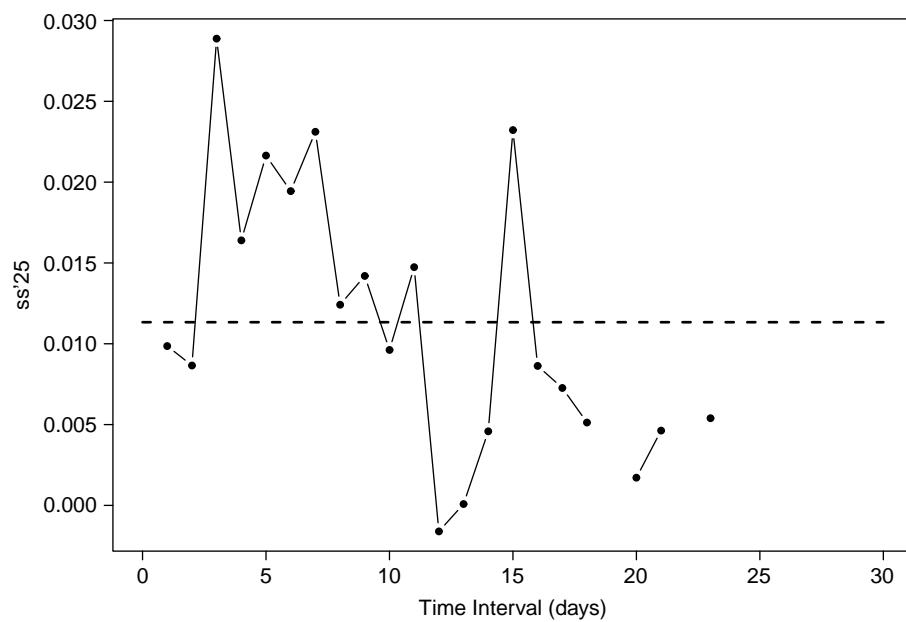

Figure S3.165. Sample Estimate of  $ss'_{25} 0.0113$ .

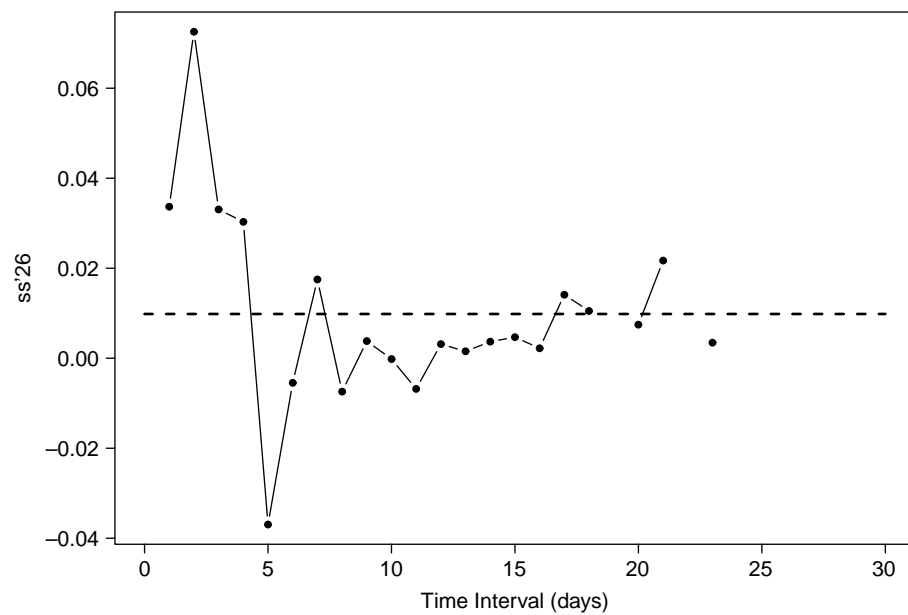

Figure S3.166. Sample Estimate of  $ss'_{26}$  0.0098.

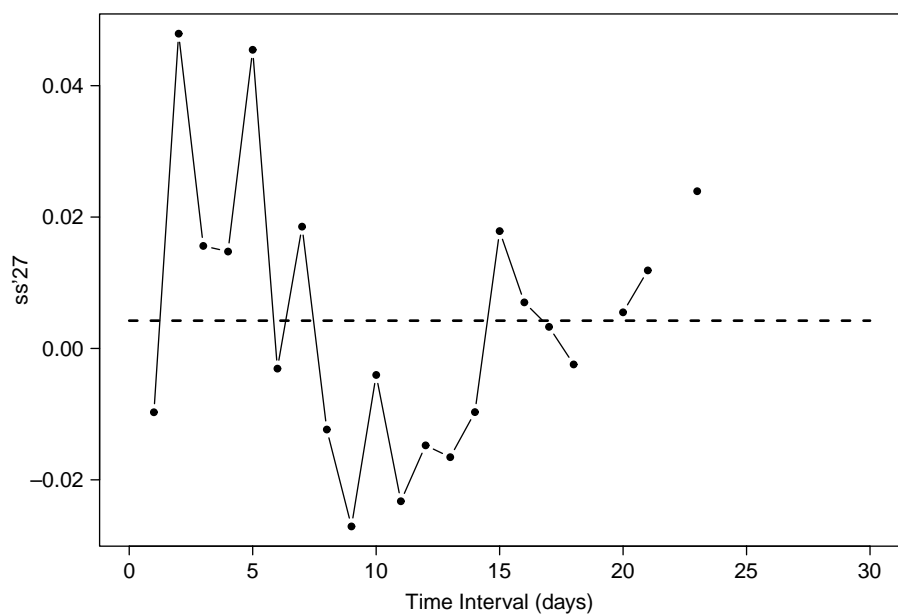

Figure S3.167. Sample Estimate of  $ss'_{27}$  0.0042.

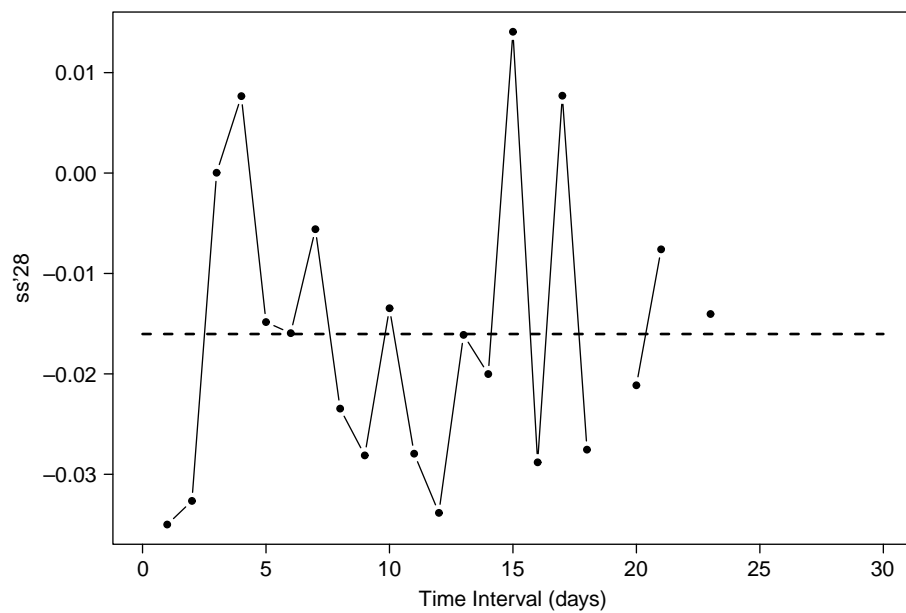

Figure S3.168. Sample Estimate of  $ss'28 - 0.016$ .

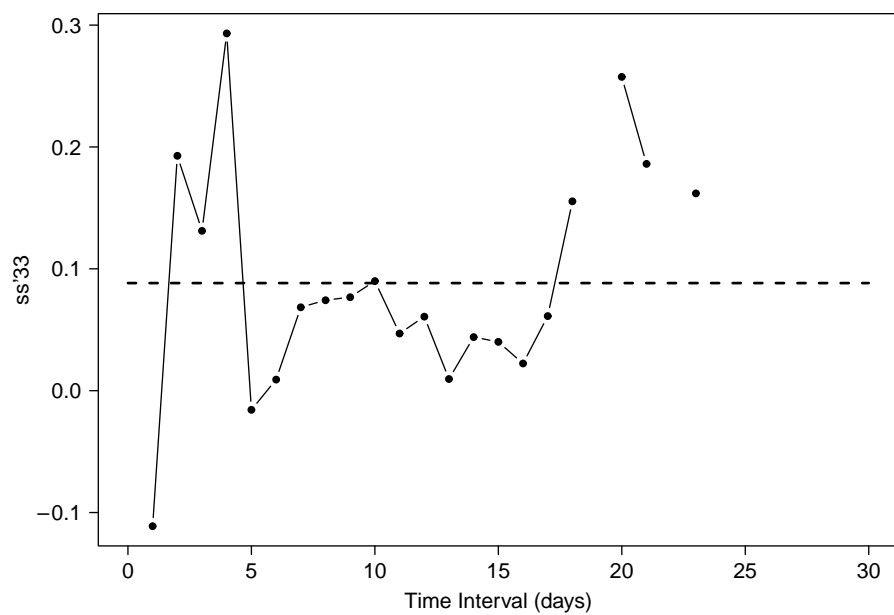

Figure S3.169. Sample Estimate of  $ss'33 - 0.0883$ .

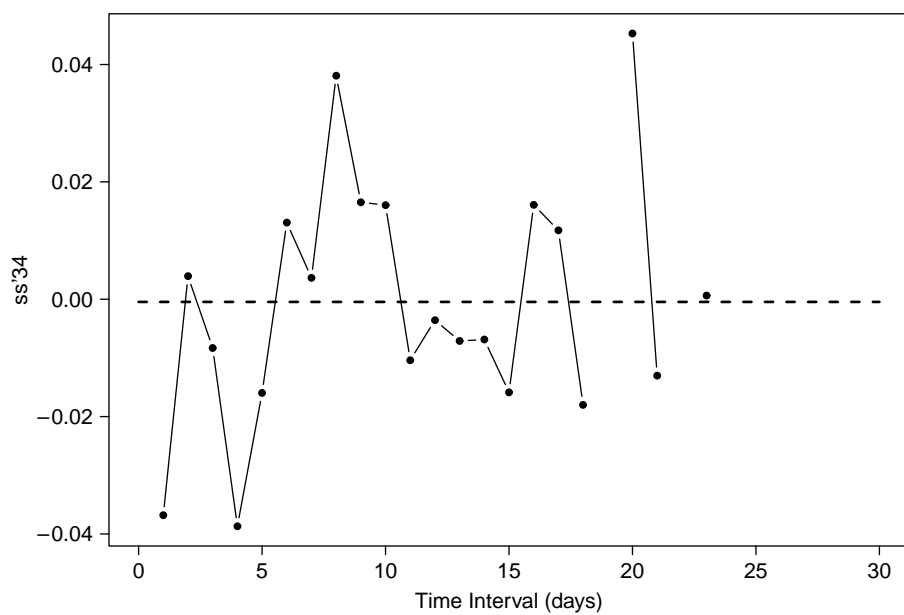

Figure S3.170. Sample Estimate of  $ss'34 - 5e-04$ .

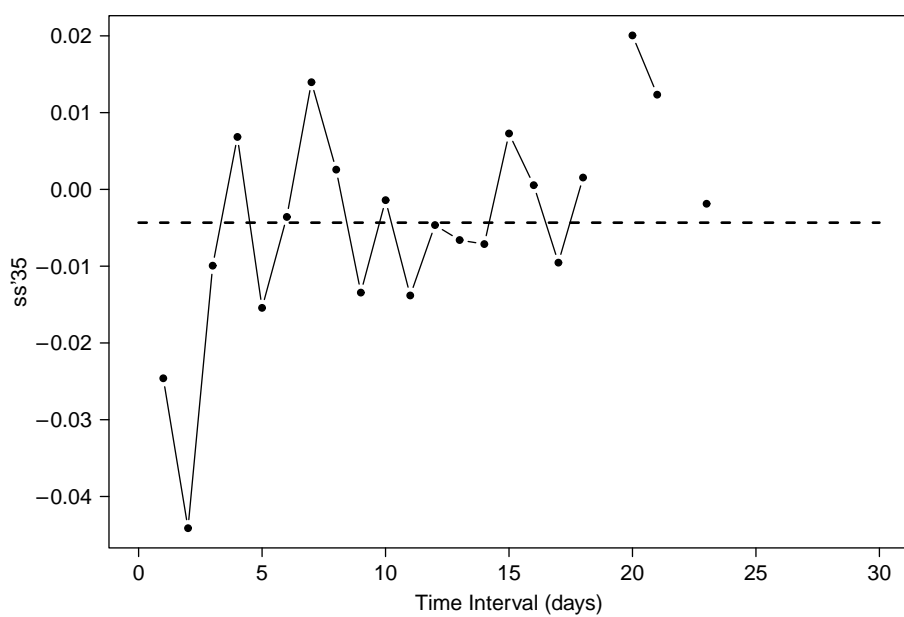

Figure S3.171. Sample Estimate of  $ss'35 - 0.0043$ .



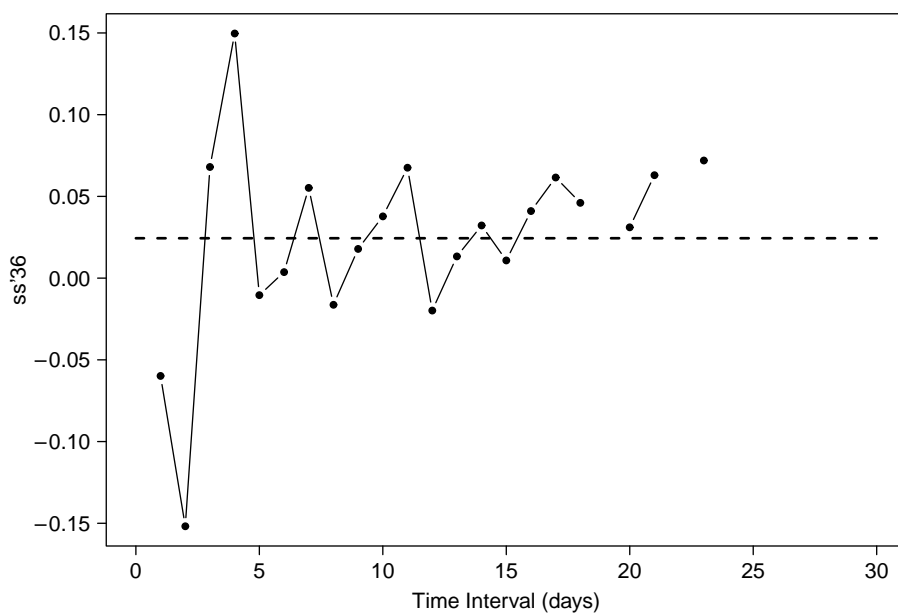

Figure S3.172. Sample Estimate of  $ss'36$  0.0244.

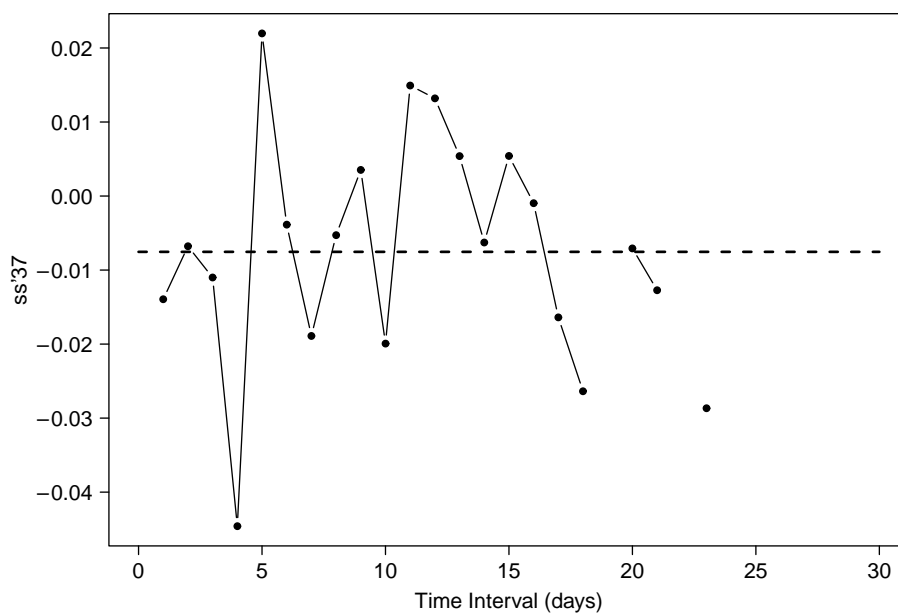

Figure S3.173. Sample Estimate of  $ss'37$  -0.0075.

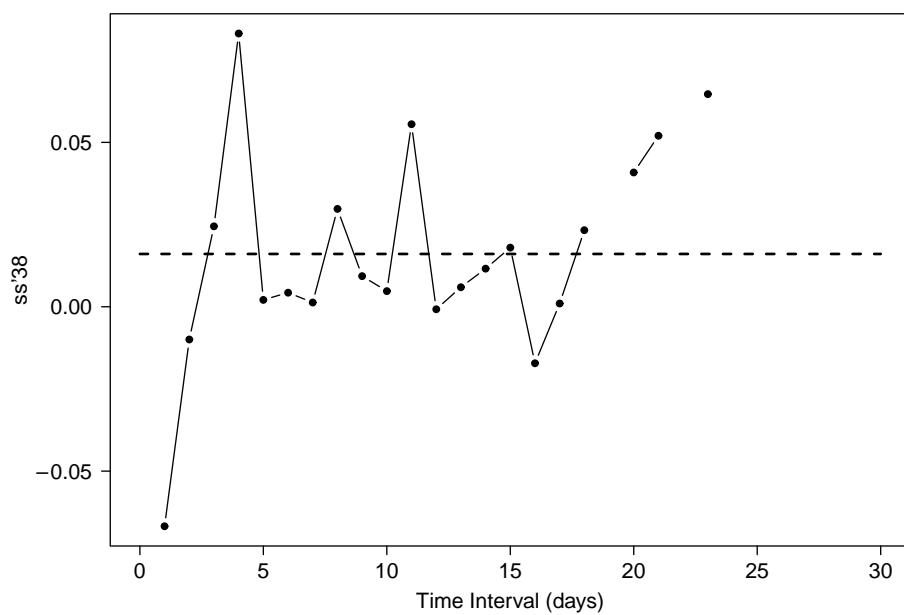

Figure S3.174. Sample Estimate of  $ss'38$  0.0161.

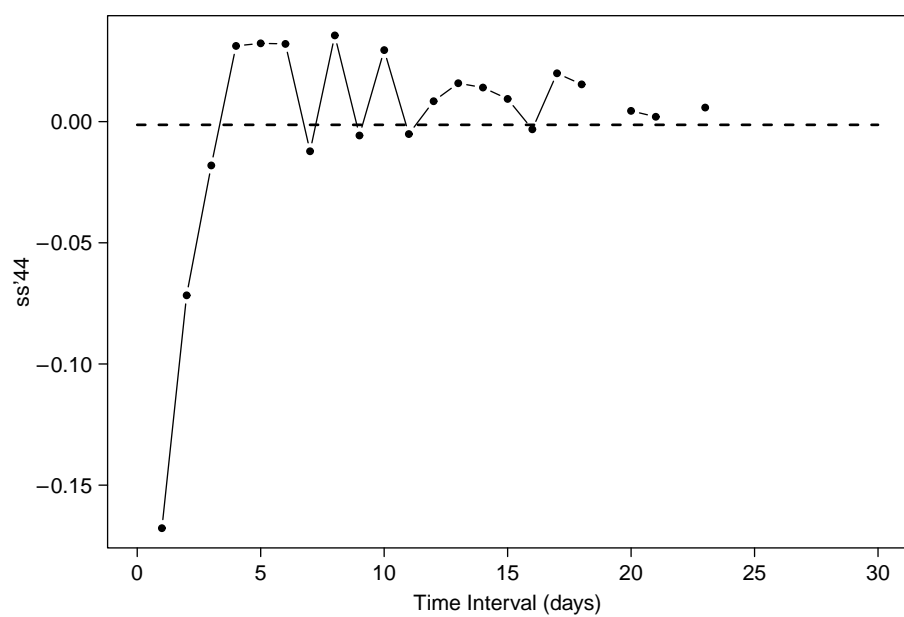

Figure S3.175. Sample Estimate of  $ss'44$  -0.0013.

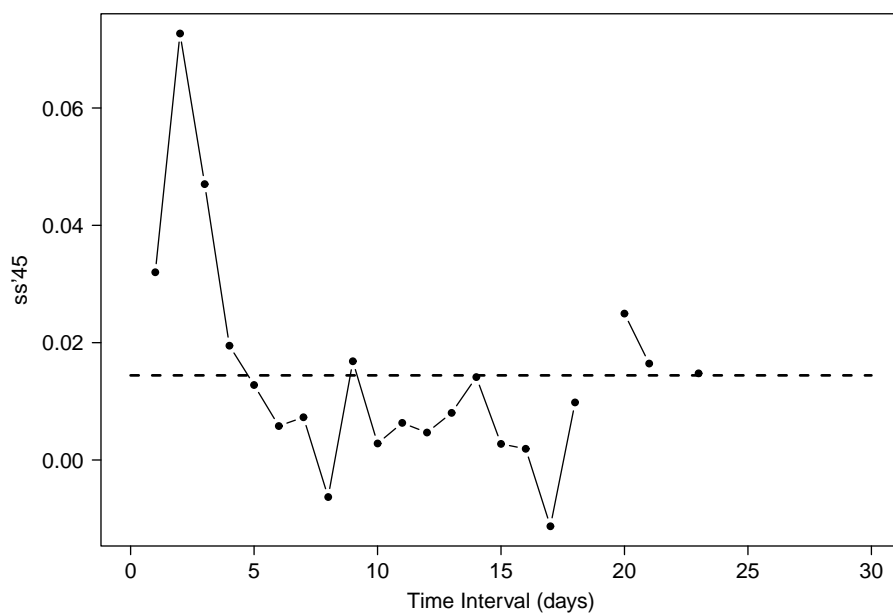

Figure S3.176. Sample Estimate of  $ss'45$  0.0144.

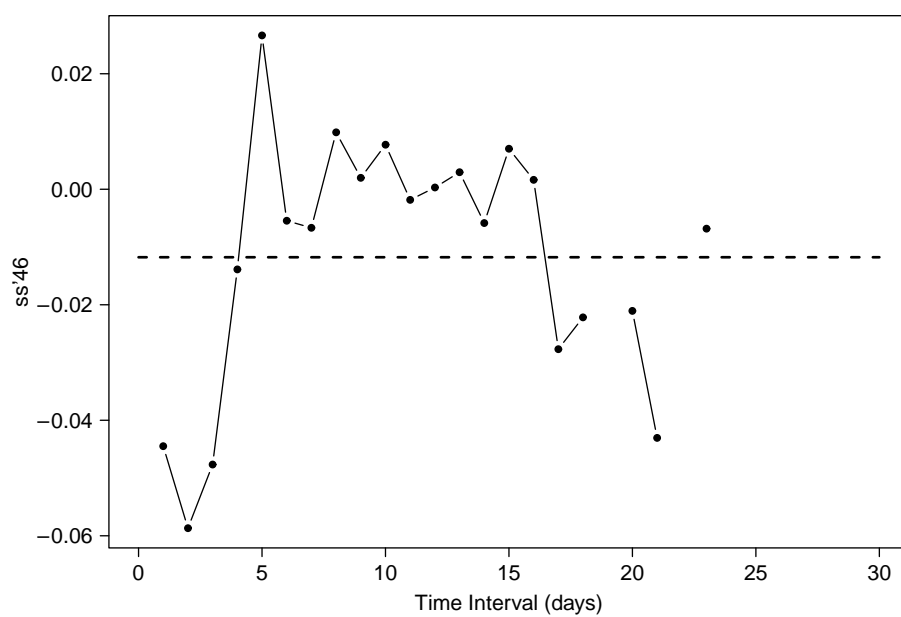

Figure S3.177. Sample Estimate of  $ss'46$  -0.0118.

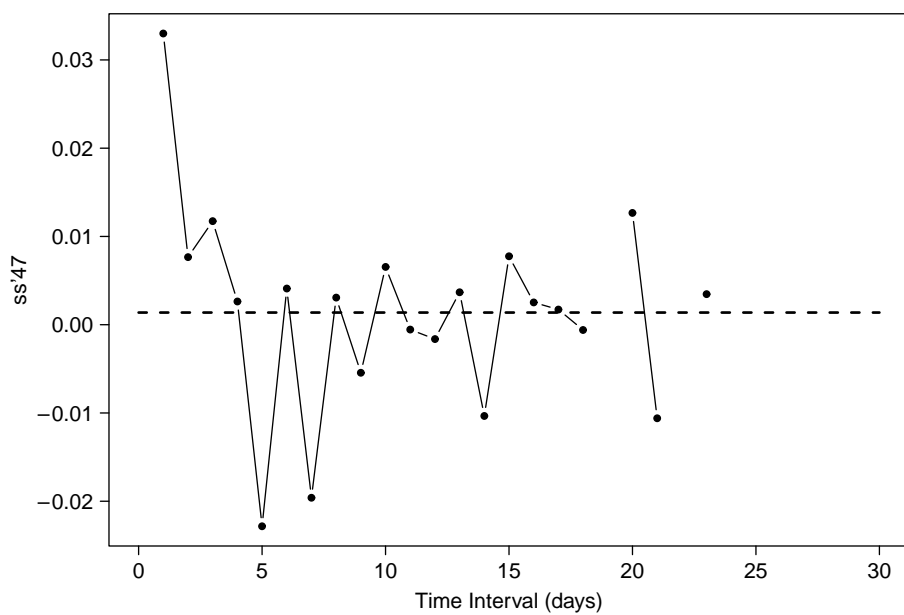

Figure S3.178. Sample Estimate of  $ss'47$  0.0014.

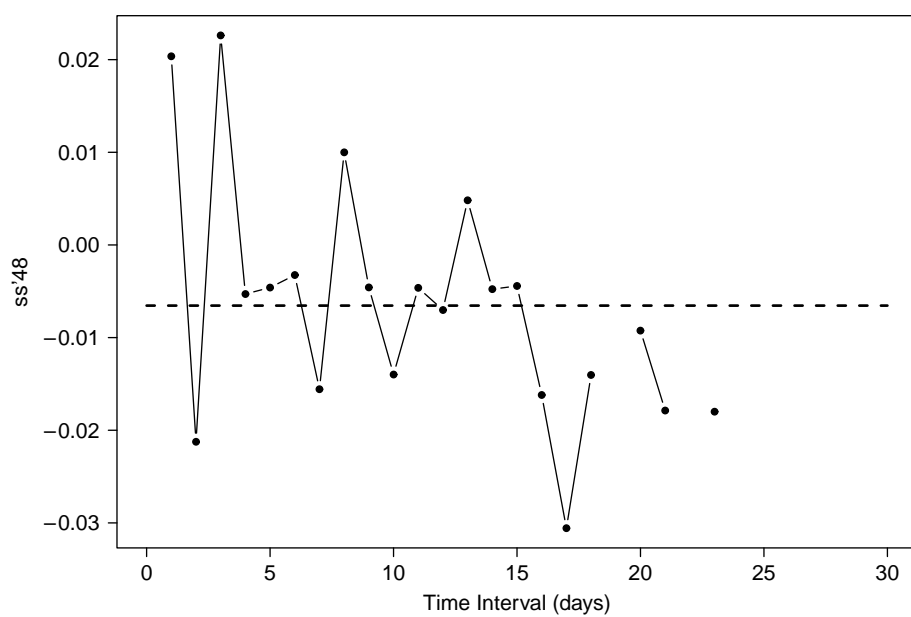

Figure S3.179. Sample Estimate of  $ss'48$  -0.0065.

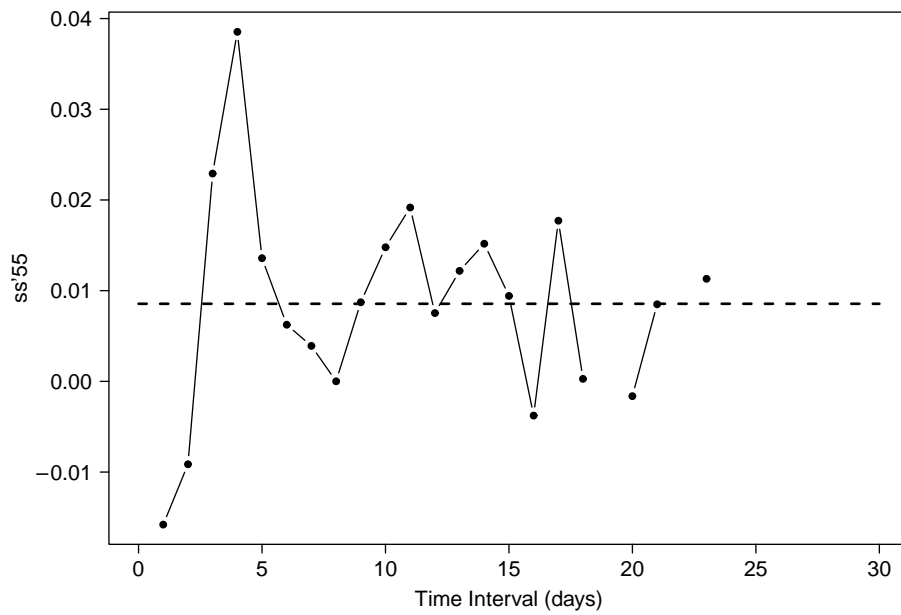

Figure S3.180. Sample Estimate of  $ss'55$  0.0086.

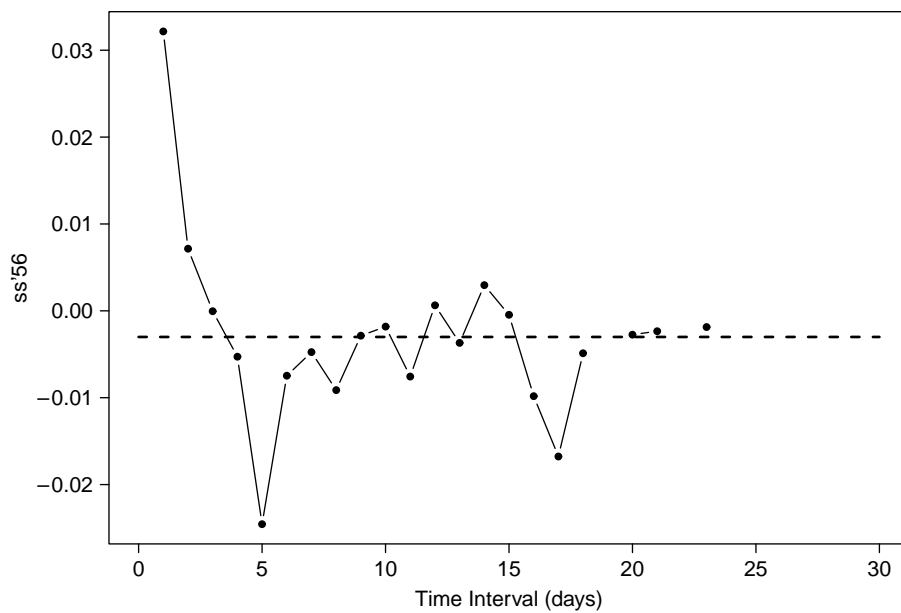

Figure S3.181. Sample Estimate of  $ss'56$  -0.003.

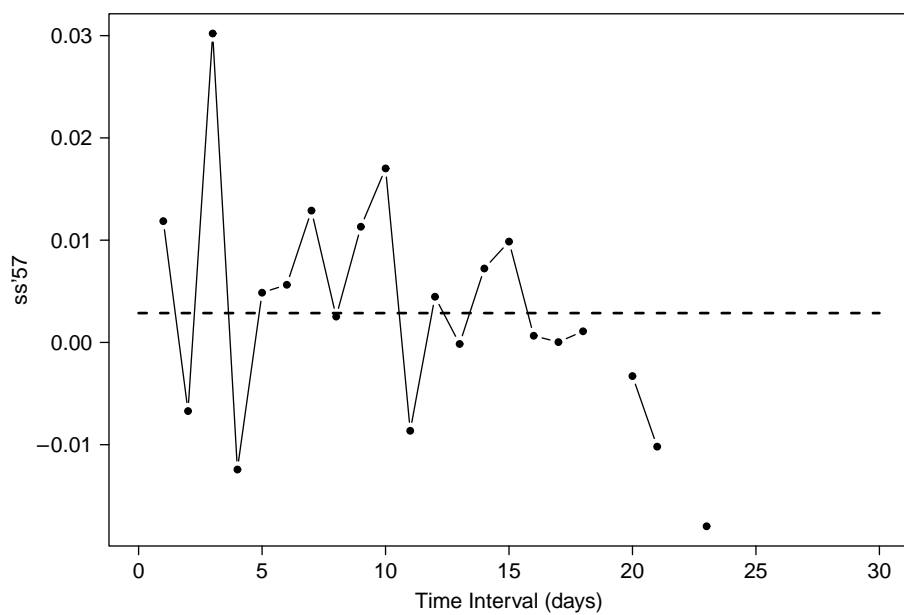

Figure S3.182. Sample Estimate of  $ss'57$  0.0029.

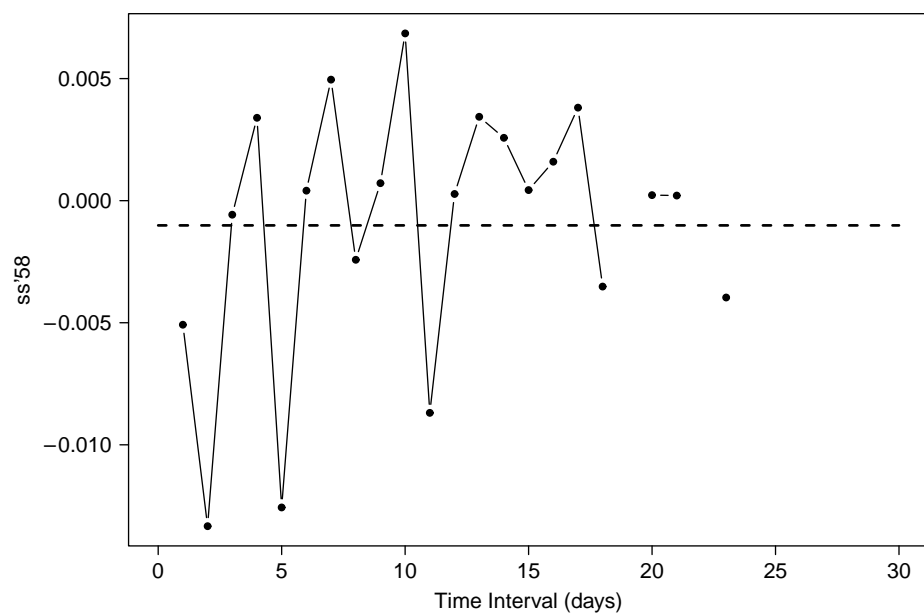

Figure S3.183. Sample Estimate of  $ss'58$  -0.001.

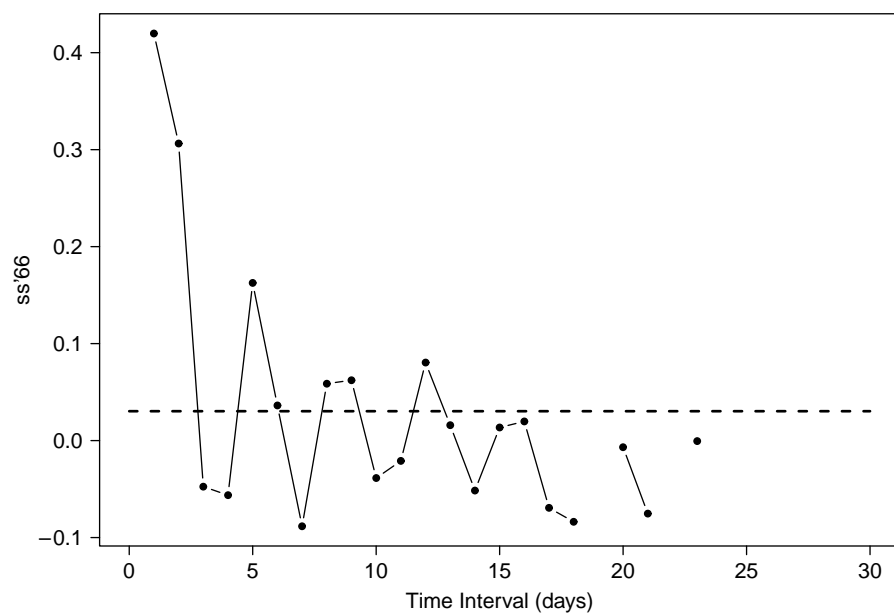

Figure S3.184. Sample Estimate of  $ss'66$  0.0303.

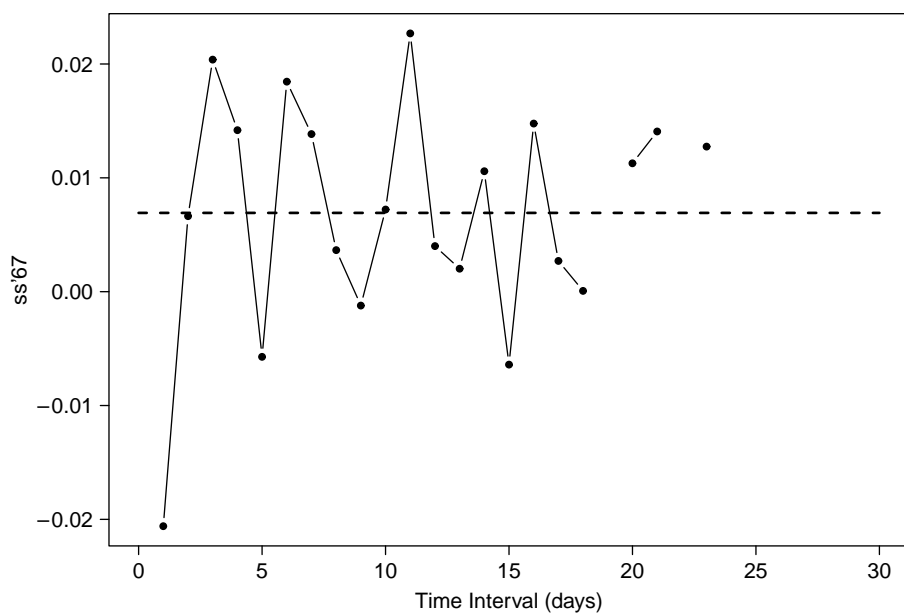

Figure S3.185. Sample Estimate of  $ss'67$  0.0069.

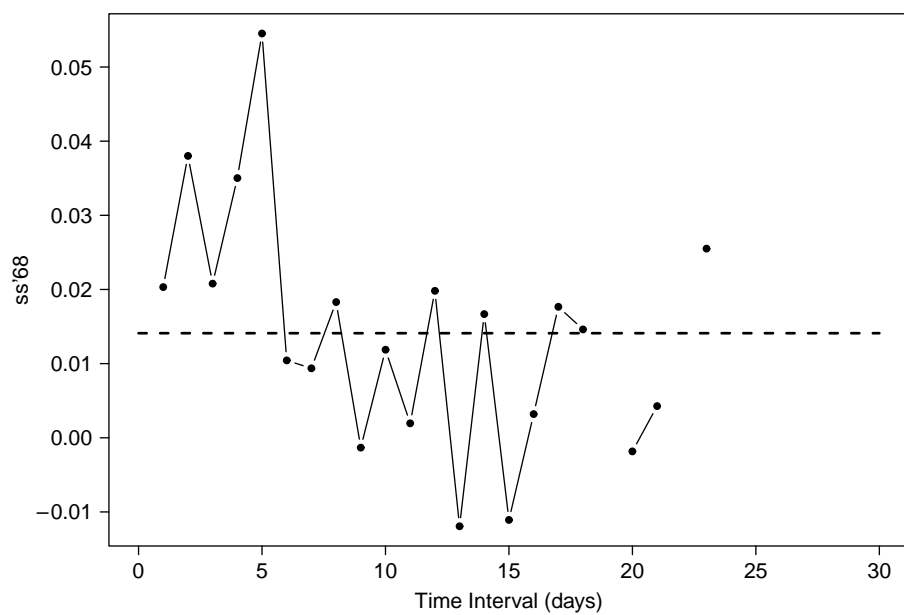

Figure S3.186. Sample Estimate of  $ss'68$  0.0141.

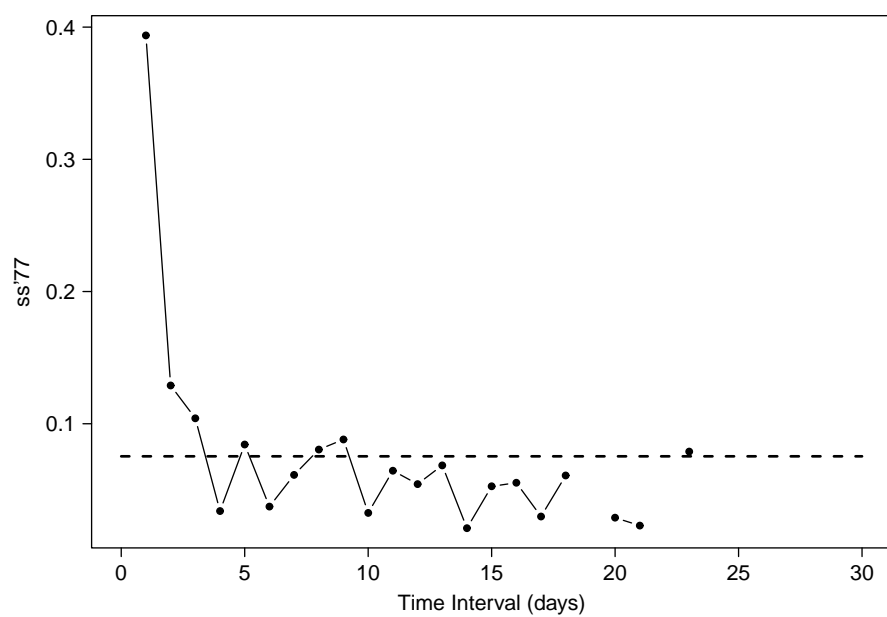

Figure S3.187. Sample Estimate of  $ss'77$  0.0754.



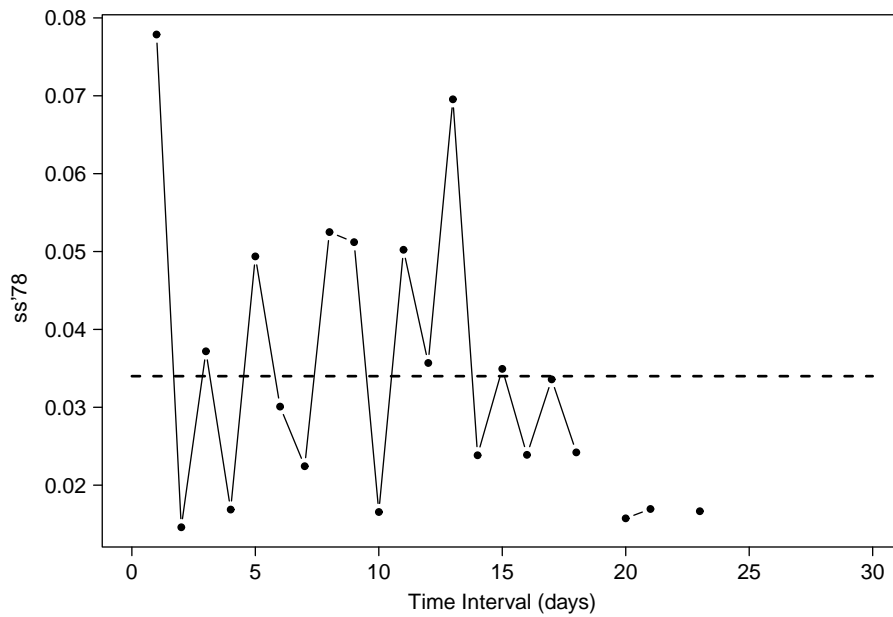

Figure S3.188. Sample Estimate of  $ss'78$  0.034.

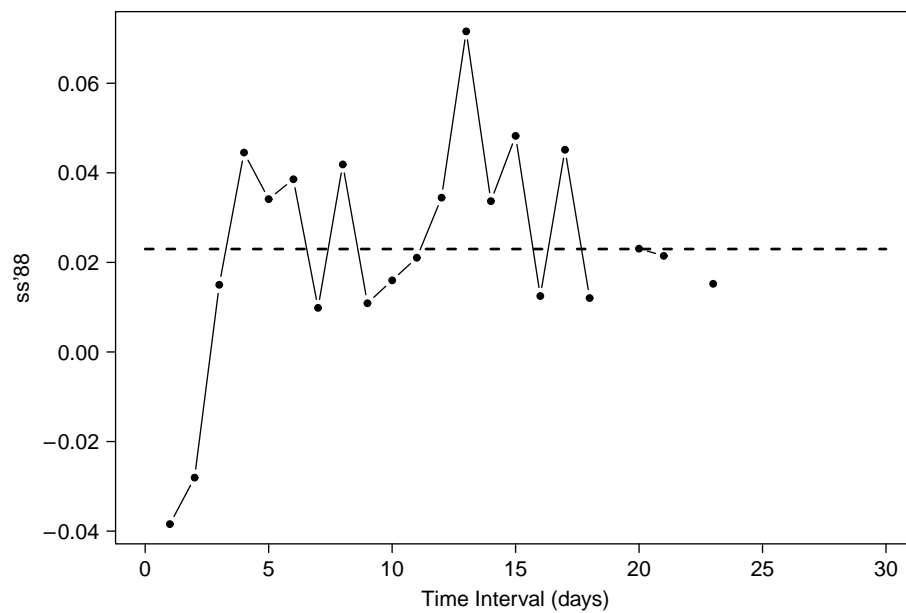

Figure S3.189. Sample Estimate of  $ss'88$  0.023.
